# Supplementary material for: Detecting the Critical States of Type 2 Diabetes Mellitus Based on Degree Matrix Network Entropy by Cross-Tissue Analysis
Source: Entropy (Basel). 2022 Sep 5;24(9):1249. doi: 10.3390/e24091249 (PMC9498060; doi:10.3390/e24091249)
Supplement: Supplementary file 1 [file entropy-24-01249-s001.zip]

Archive with 7 entries (7 files):
- Supplementary Material.pdf
- Supplementary Table S1.xlsx
- Supplementary Table S2.xlsx
- Supplementary Table S3.xlsx
- Supplementary Table S4.xlsx
- Supplementary Table S5.xlsx
- Supplementary Table S6.xlsx
