# Supplementary material for: Detecting the Critical States of Type 2 Diabetes Mellitus Based on Degree Matrix Network Entropy by Cross-Tissue Analysis
Source: Entropy (Basel). 2022 Sep 5;24(9):1249. doi: 10.3390/e24091249 (PMC9498060; doi:10.3390/e24091249)
Supplement: Supplementary file 1 [file entropy-24-01249-s001.zip › Supplementary Material.pdf]

**Supplementary Material:**  
**Detecting the Critical States of Type 2 Diabetes**  
**Mellitus Based on Degree Matrix Network Entropy by**  
**Cross-tissue Analysis**

**Contents**

|     |                                                                                                                       |    |
|-----|-----------------------------------------------------------------------------------------------------------------------|----|
| S1. | Comparison of different parameters of CSN.....                                                                        | 1  |
| S2. | The identification of 'dark genes' for T2DM with PAAD data.....                                                       | 2  |
| S3. | Drug target analysis for GSE13268: Rat Adipose Tissue .....                                                           | 4  |
| S4. | Drug target analysis for GSE13269: Rat Gastrocnemius Muscle Tissue.....                                               | 10 |
| S5. | Drug target analysis for GSE13270: Rat Liver: Rat Liver Tissue .....                                                  | 16 |
| S6. | Enrichment Results and Analysis of GSE13269 (Rat Gastrocnemius Muscle Tissue)<br>and GSE13270 (Rat Liver Tissue)..... | 19 |
|     | References.....                                                                                                       | 24 |

### S1. Comparison of different parameters of CSN

According to the research of Dai et al. [1], the influence of box size and P value in different data sets on clustering effect is tested from the point of view of clustering. It is indicated that the optimum box size is about 0.1, and the optimum P-value is about 0.01 on average, which are set as the default parameters of CSN method. So we choose  $0.1 \times k$ , and we can adjust the parameters according to the specific needs. From the Figure 1, we can see some different data sets box size is stable and the final estimate of the value not much difference.

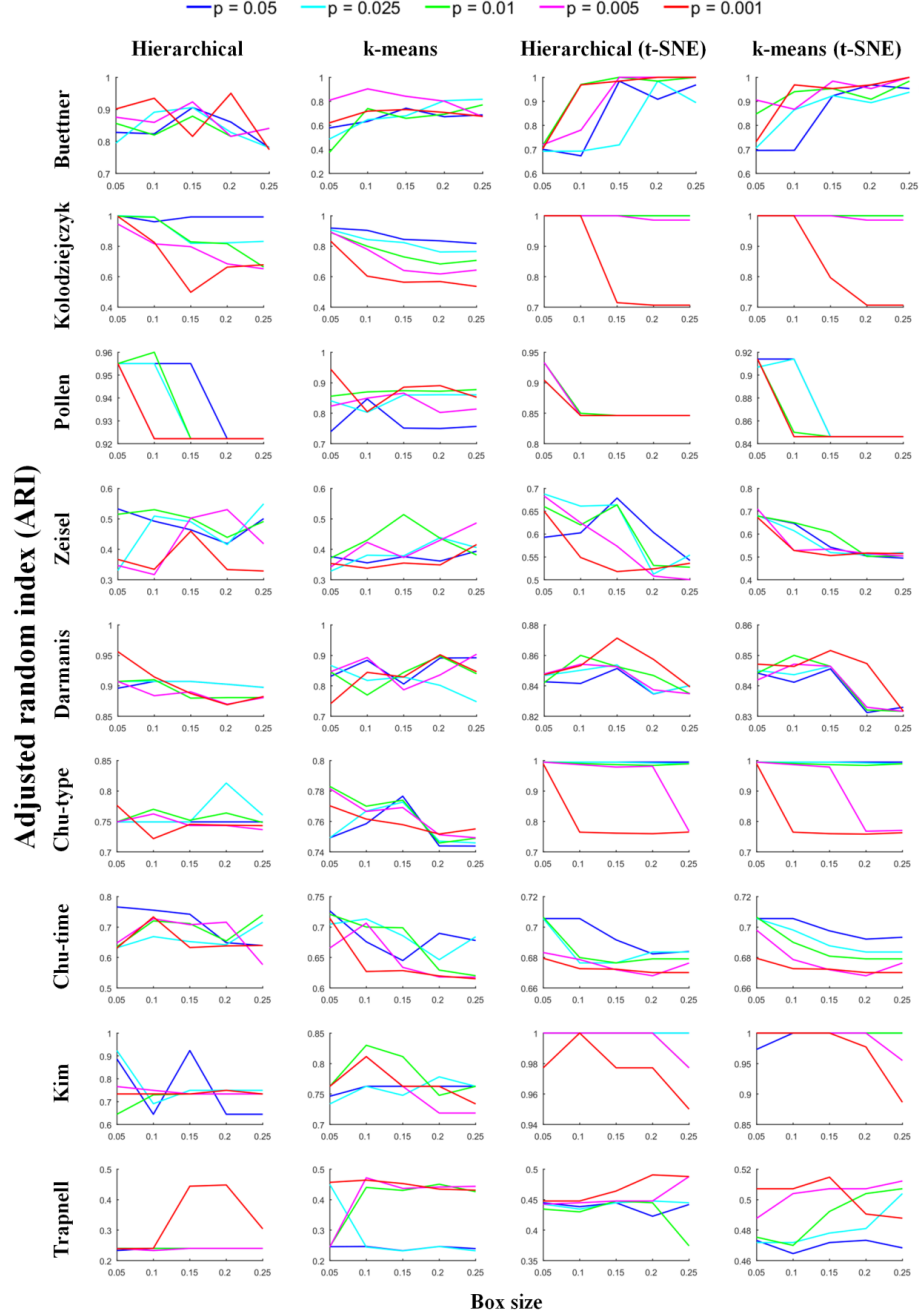

Figure S1. Comparison of different parameters of CSN. X-axis is box size and different colors represent different p-value. Y-axis is the ARI in clustering analysis. The results show that the optimum box size is about 0.1, and the optimum p-value is about 0.01, on average.

## S2. The identification of ‘dark genes’ for T2DM with PAAD data

In clinical practice and scientific research, differentially expressed genes draw much attention in early diagnosis of disease, screening drug targets, treating diseases, and developing new drugs. However, some non-differential genes in the coding region of DNA are called “Dark Matter” [2]. Based on DMNE method, we find some ‘dark genes’ with-out differential expressions which are especially sensitive to DMNE score. Traditional analyses usually ignore them.

Pancreatic adenocarcinoma (PAAD) and T2DM are inter-related. The outcomes of this association are the topic of interest of a lot of prior research in this field. At present, due to the lack of corresponding prognostic data in the study of T2DM, the prognostic analysis of T2DM cannot be performed directly. Therefore, we use the data of PAAD to analyze the prognosis of T2DM, attempting to reveal the mechanism of the development of T2DM from another view.

PAAD survival data and the gene expression values in different samples are downloaded from the TCGA database. 178 samples are selected for analysis. The expression values are processed by DMNE to obtain the DMNE score. We analyze the prognosis of these ‘dark genes’ respectively based on gene expression and DMNE score by dividing the samples into two groups based on the median of genes expression or DMNE score. Group 1 is a group with higher value and Group 2 is a group with a lower value. Based on the result of prognosis, the ‘dark genes’ can be categorized into two types of molecules as a mutual biomarker for all samples. Those genes with high scores that cause poor prognosis are termed “negative dark genes”, and those genes with high scores that cause good prognosis termed “positive dark genes”. If “negative dark genes” appear in the DNBs, the sample’s prognosis will be more negative than that of other samples. Similarly, if “positive dark genes” appear in the DNBs, the sample’s prognosis will be more positive than others.

Further analysis shows that ‘dark genes’ are all strongly related to patients’ survival based on DMNE score but not expression levels. Figure.S4 shows the survival analysis of PCOLCE, HPX, BCKDHA, IFITM1, DEPDC1 and COL1A1 results with P-values < 0.05 based on some non-differential genes in DNBs of T2DM. As shown in Figure S4, the p values of survival curves obtained from gene expression values are all greater than 0.05 (PCOLCE:0.56, HPX:0.41, BCKDHA:0.89, IFITM1:0.19, DEPDC1:0.72, COL1A1:0.93), and the p values of survival curves obtained from DMNE score are all less than 0.05 (PCOLCE:0.034, HPX:0.036, BCKDHA:0.028, IFITM1:0.031, DEPDC1:0.0041, COL1A1:0.0071). P value <0.05 is statistically significant. A higher level of DMNE score in PCOLCE and HPX is significantly related to a good prognosis, i.e., positive ‘dark genes’. While a higher level of DMNE score in BCKDHA, IFITM1, DEPDC1 and COL1A1 is significantly related to poor prognosis, i.e., negative ‘dark genes’ (Figure 4). COL1A1 is linked to hypoglycemic activity [2]. This shows the effectiveness of the development of PAAD for the ‘dark genes’ in the DNBs from the side.

A large number of epidemiological studies have found that T2DM is positively associated with an increased risk of PAAD. Long-term type 2 diabetes increases the risk of PAAD by 1.5 to 2 times. Thirty to 40 percent of pancreatic cancer patients have

diabetes and 80 percent have abnormal glucose tolerance. Therefore, some ‘dark genes’ related with the prognosis of PAAD may play important role in the development of T2DM, such as COL1A1 is the most significant gene in the extracellular matrix receptor interaction pathway and is linked to hypoglycemic activity [3], which may affect the fluctuation of blood glucose and the prognosis of T2DM and the occurrence and development of chronic complications [4].

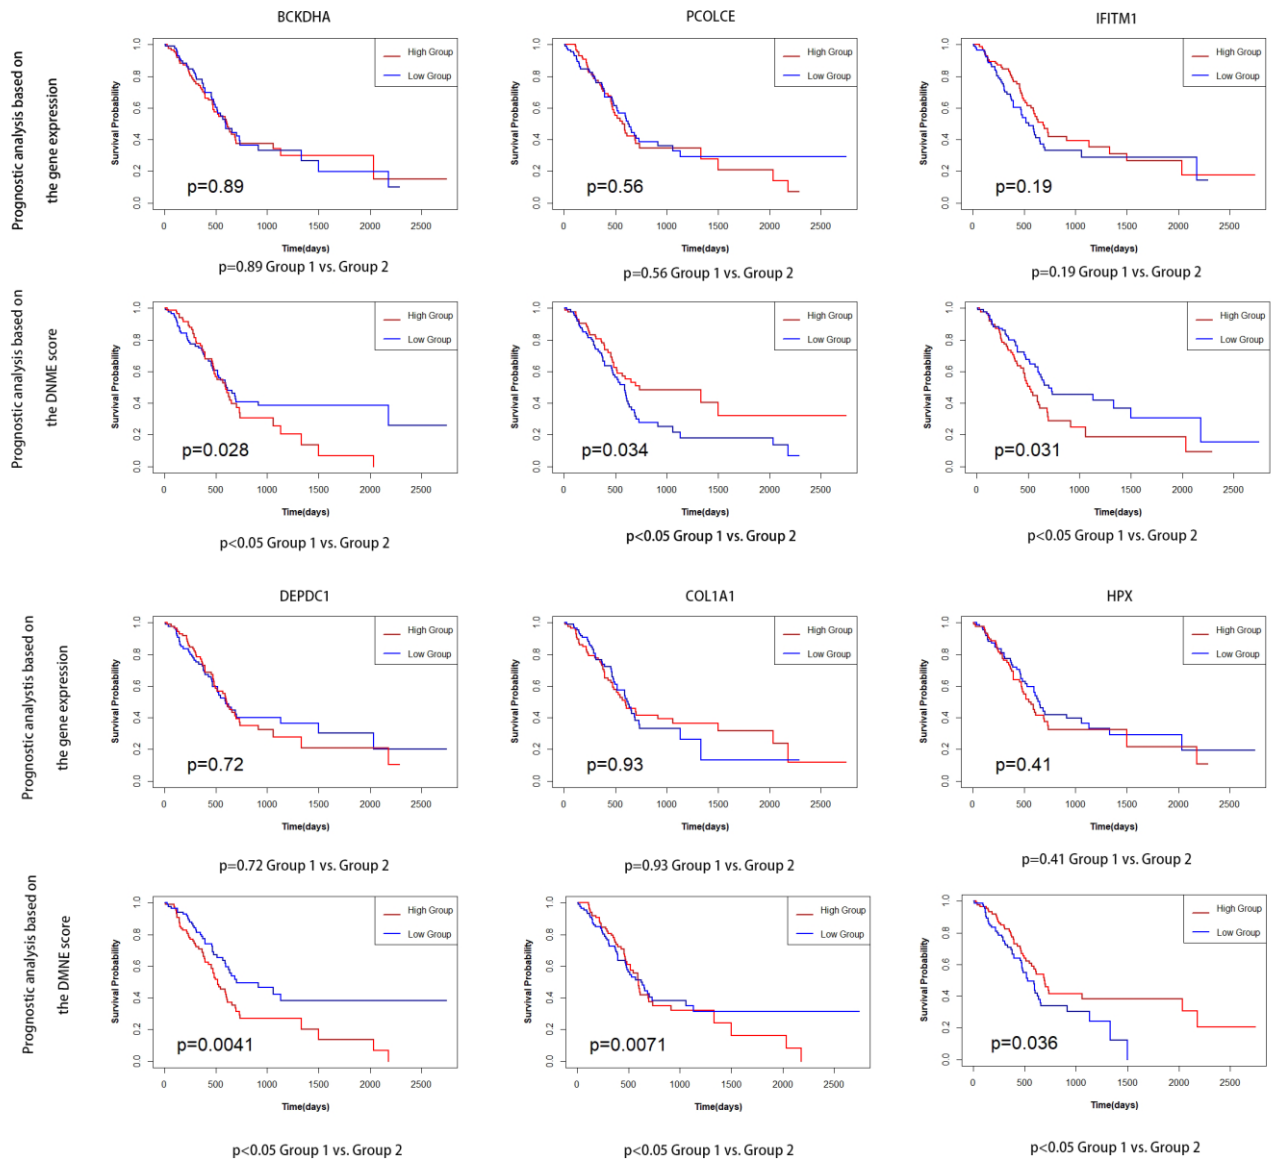

Figure S2. The comparison of prognosis analysis between gene expression and DMNE score of ‘dark genes’. For T2DM, BCKDHA, PCOLCE, IFITM1, DEPDC1, COL1A1 and HPX, are ‘dark genes’, whose DMNE scores are more sensitive to the early-warning signal of disease deterioration, and can predict prognosis better than gene expressions. The prognosis of these ‘dark genes’ show that there are significant differences between survival times of the two group samples, i.e., the high value group and the low value group, based on DMNE scores rather than gene expressions.

### S3. Drug target analysis for GSE13268: Rat Adipose Tissue

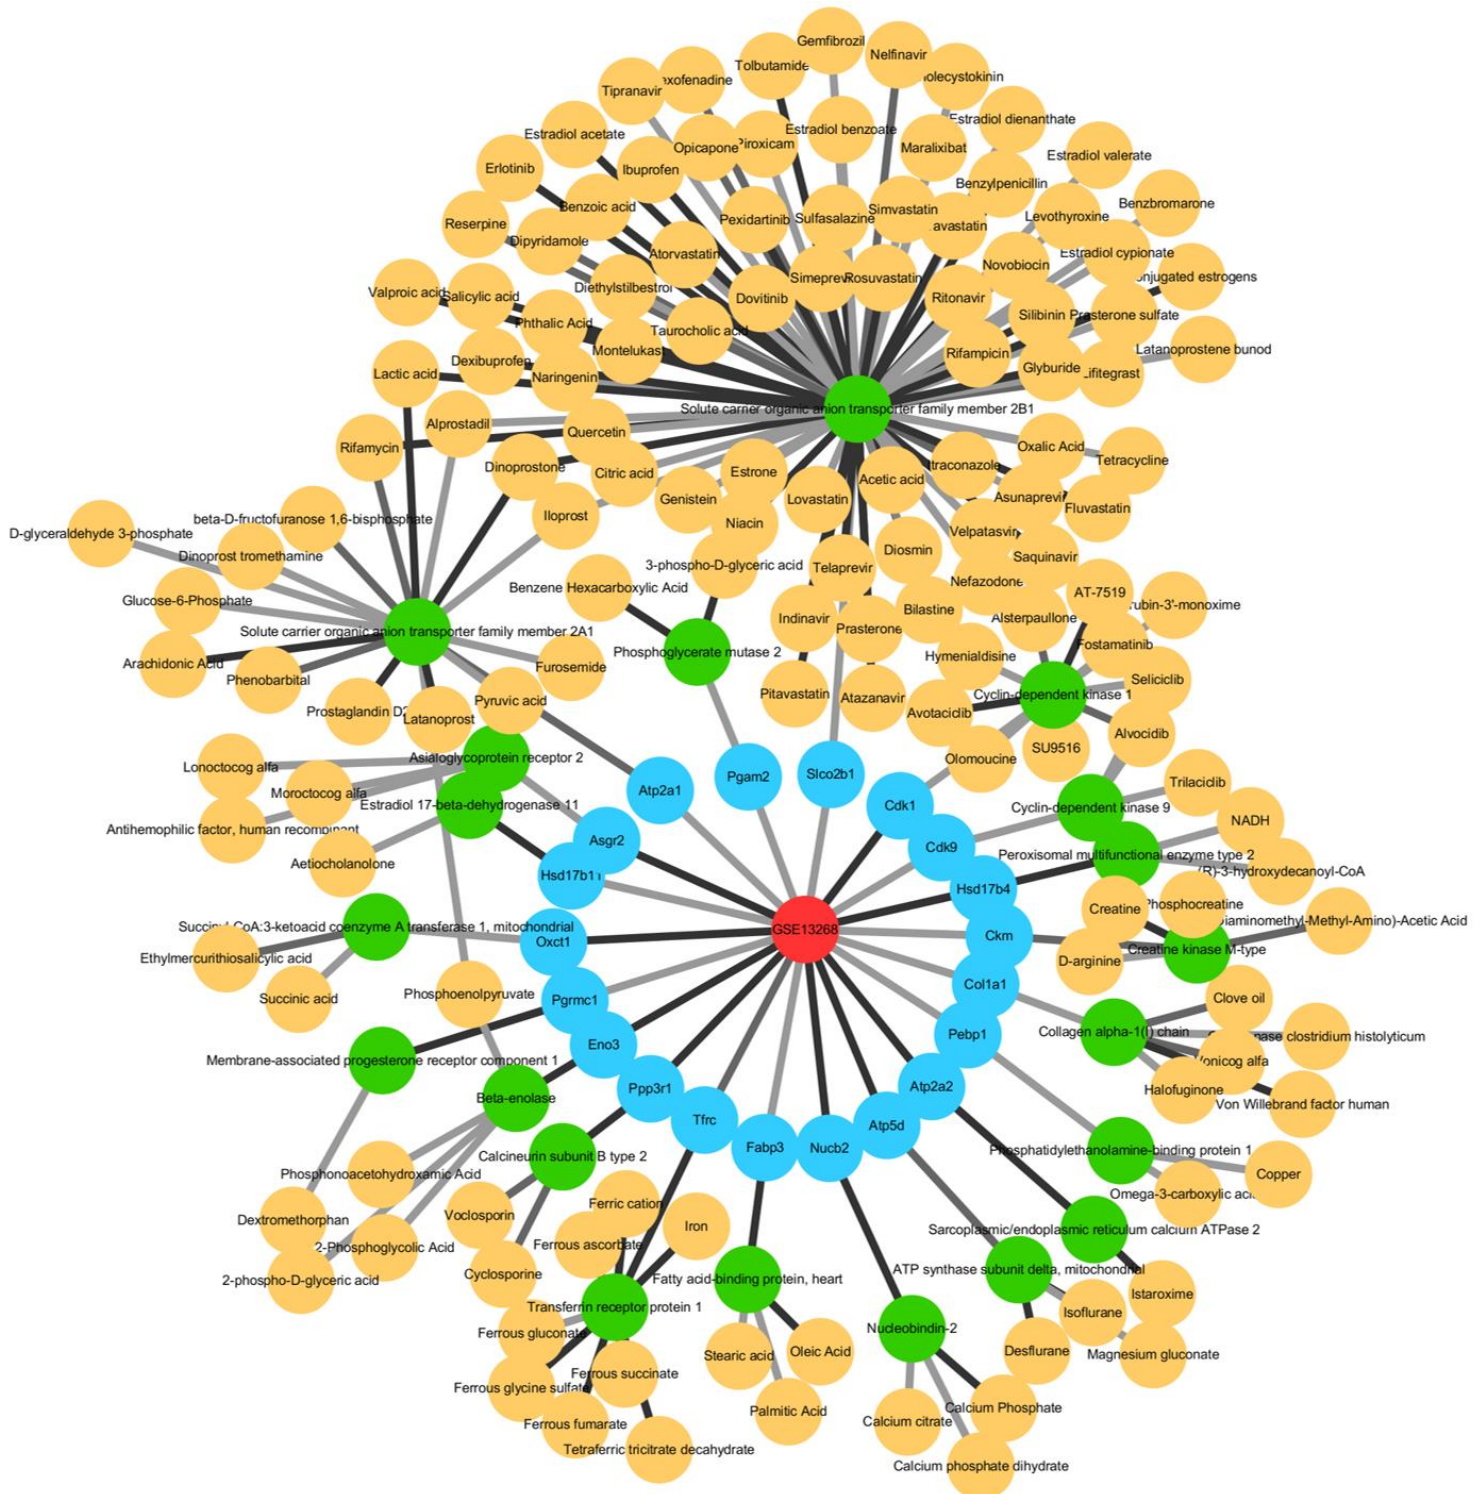

a

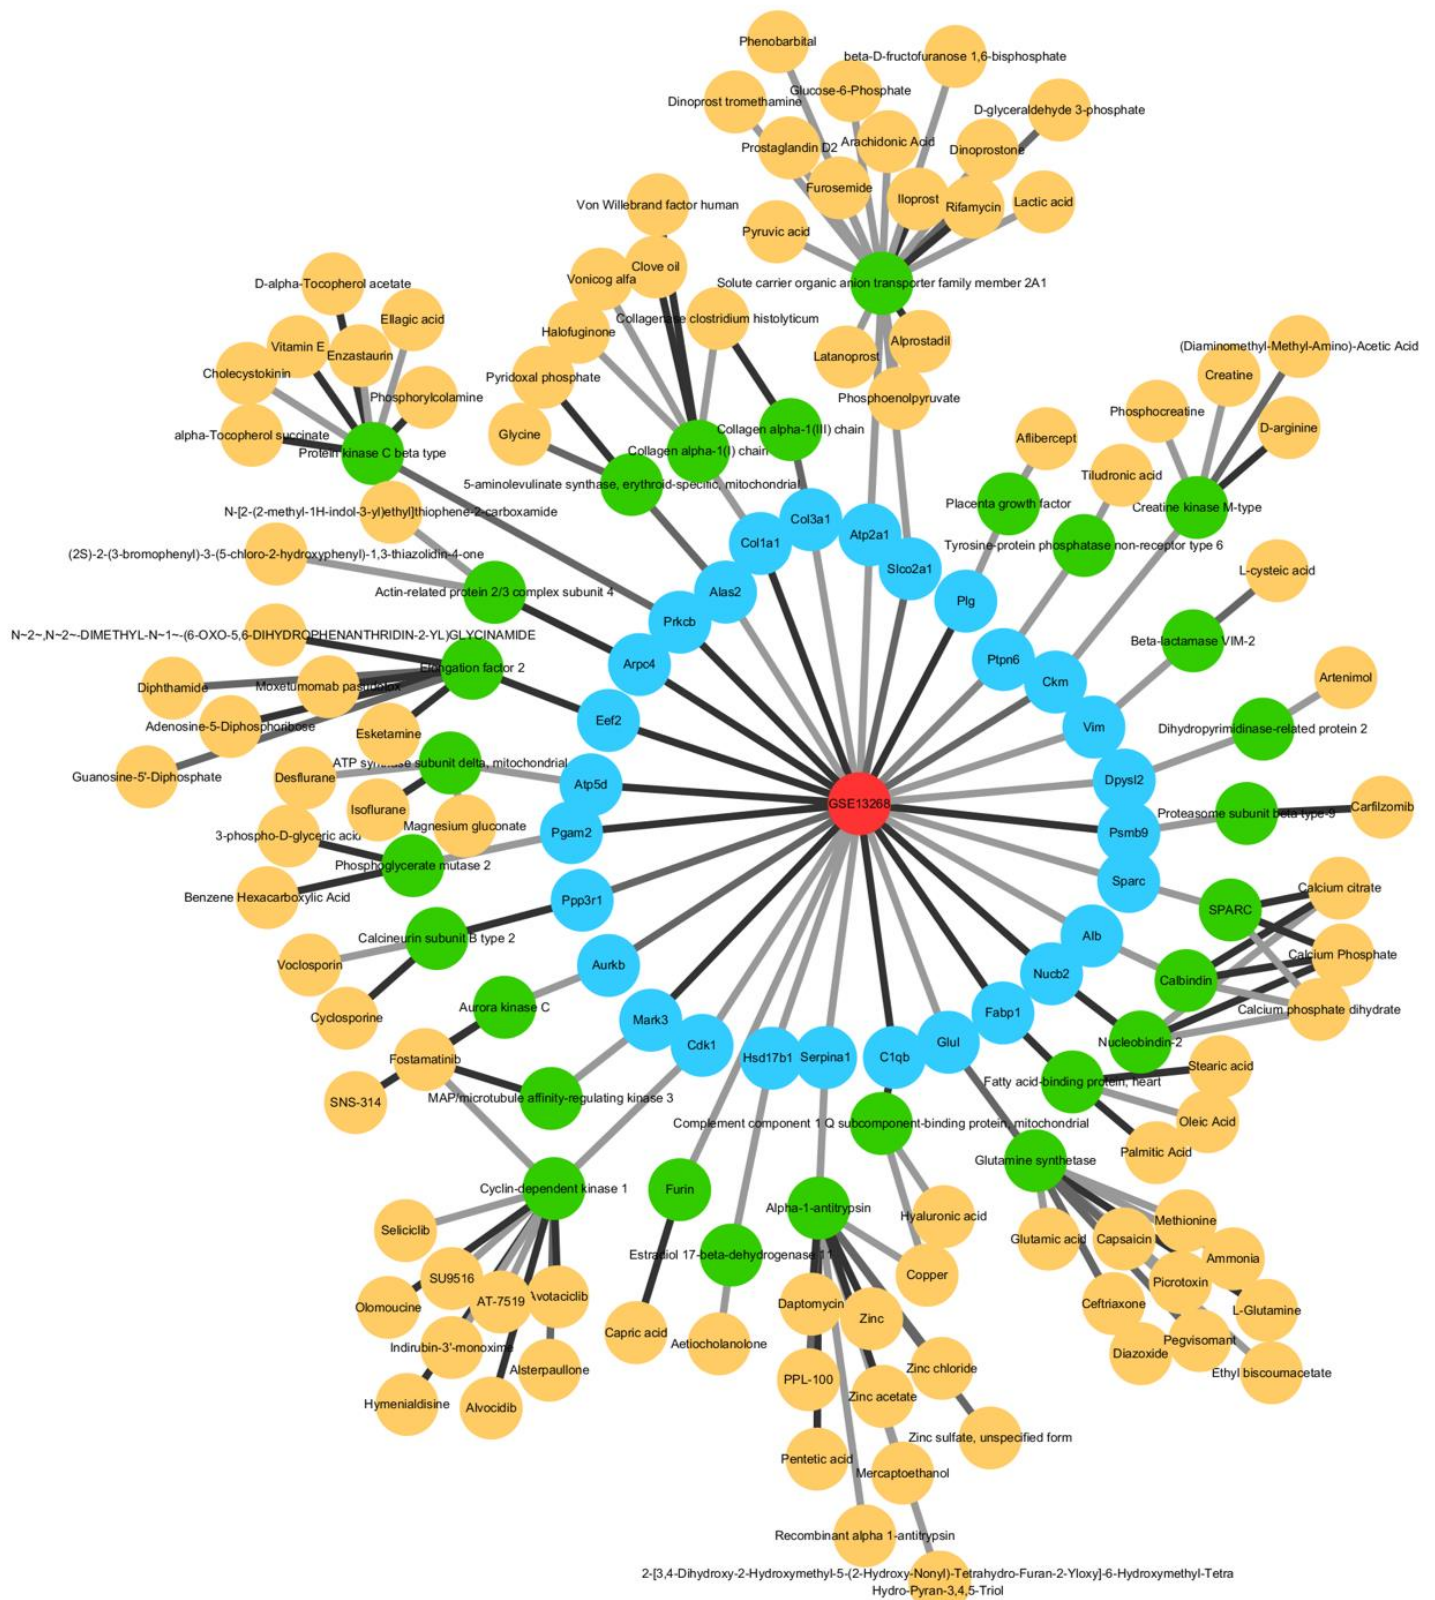

b





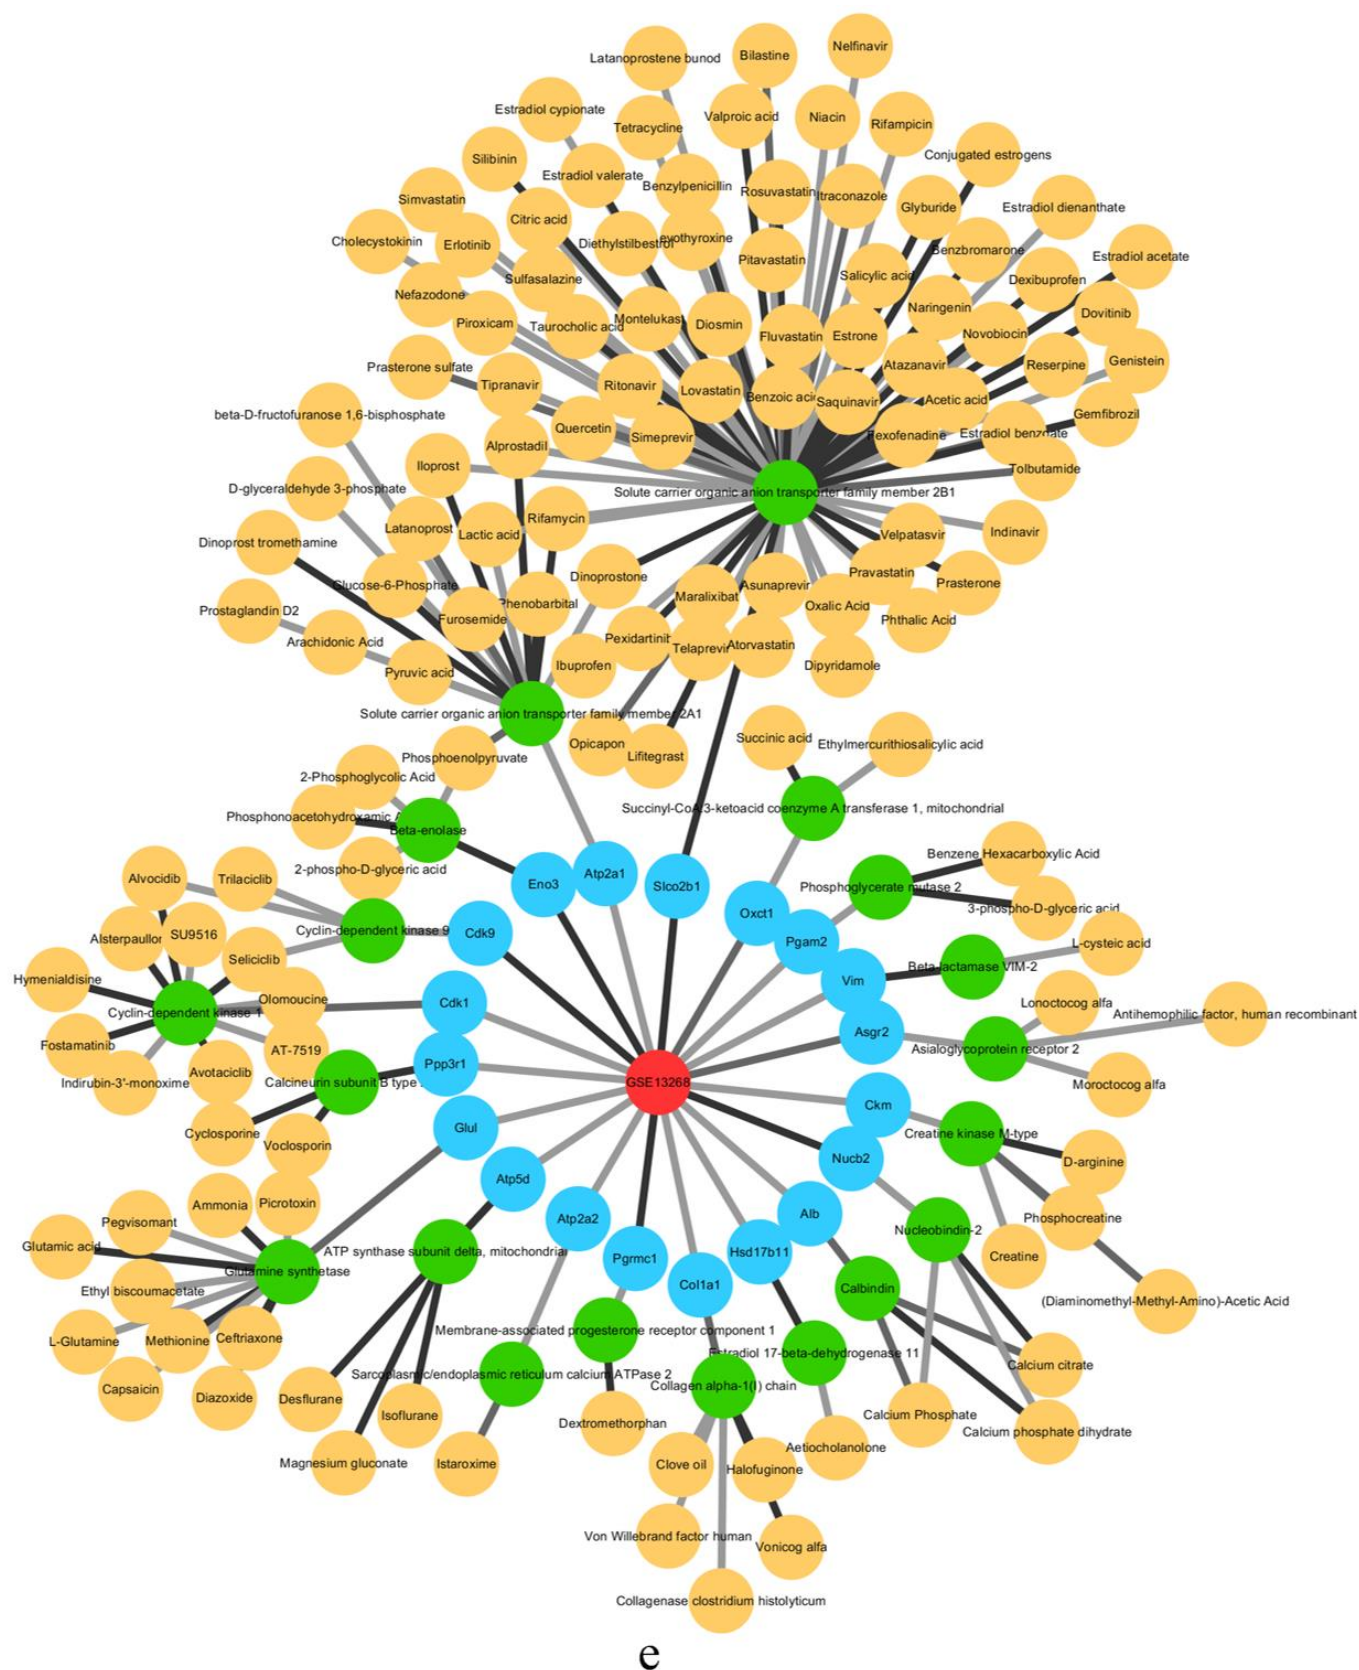

Figure S3: The drug target analysis for GSE13268, involving rat adipose tissue. (a) Drug targets, the corresponding proteins and targeted drugs at (a) stage I; (b) stage II; (c)

stage III; (d) stage IV; (e) stage V.

In the drug target of the second phase of GSE13268, CKM, or creatine kinase, is a target protein sought from mouse skeletal muscle and is associated with T2D-associated energy metabolism. CKM binds to 16:0/16:0-PA, with the highest affinity among PA binding proteins reported to date [5]. Col1a1 is the most important gene in extracellular matrix receptor interactions and has been identified to be associated with hypoglycemic activity. Therefore, in terms of alleviating T2D, Col1a1 can serve as a new potential therapeutic target [3].

## S4. Drug target analysis for GSE13269: Rat Gastrocnemius Muscle Tissue

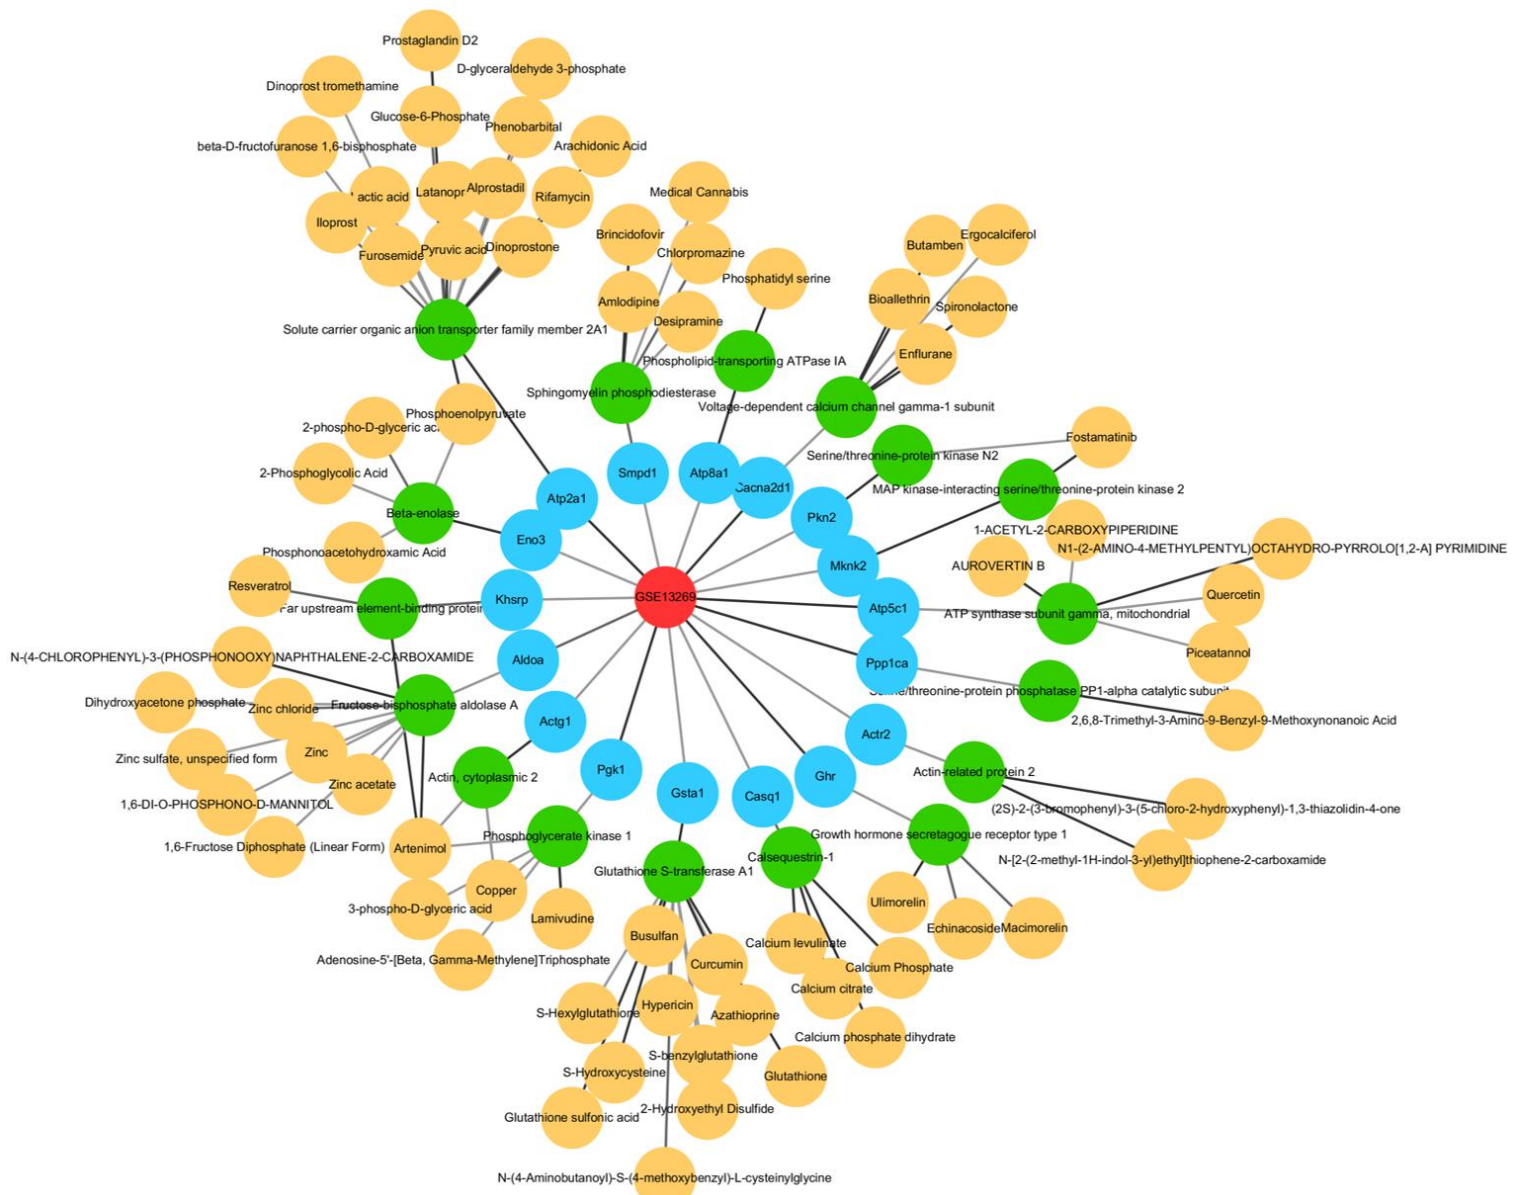

a



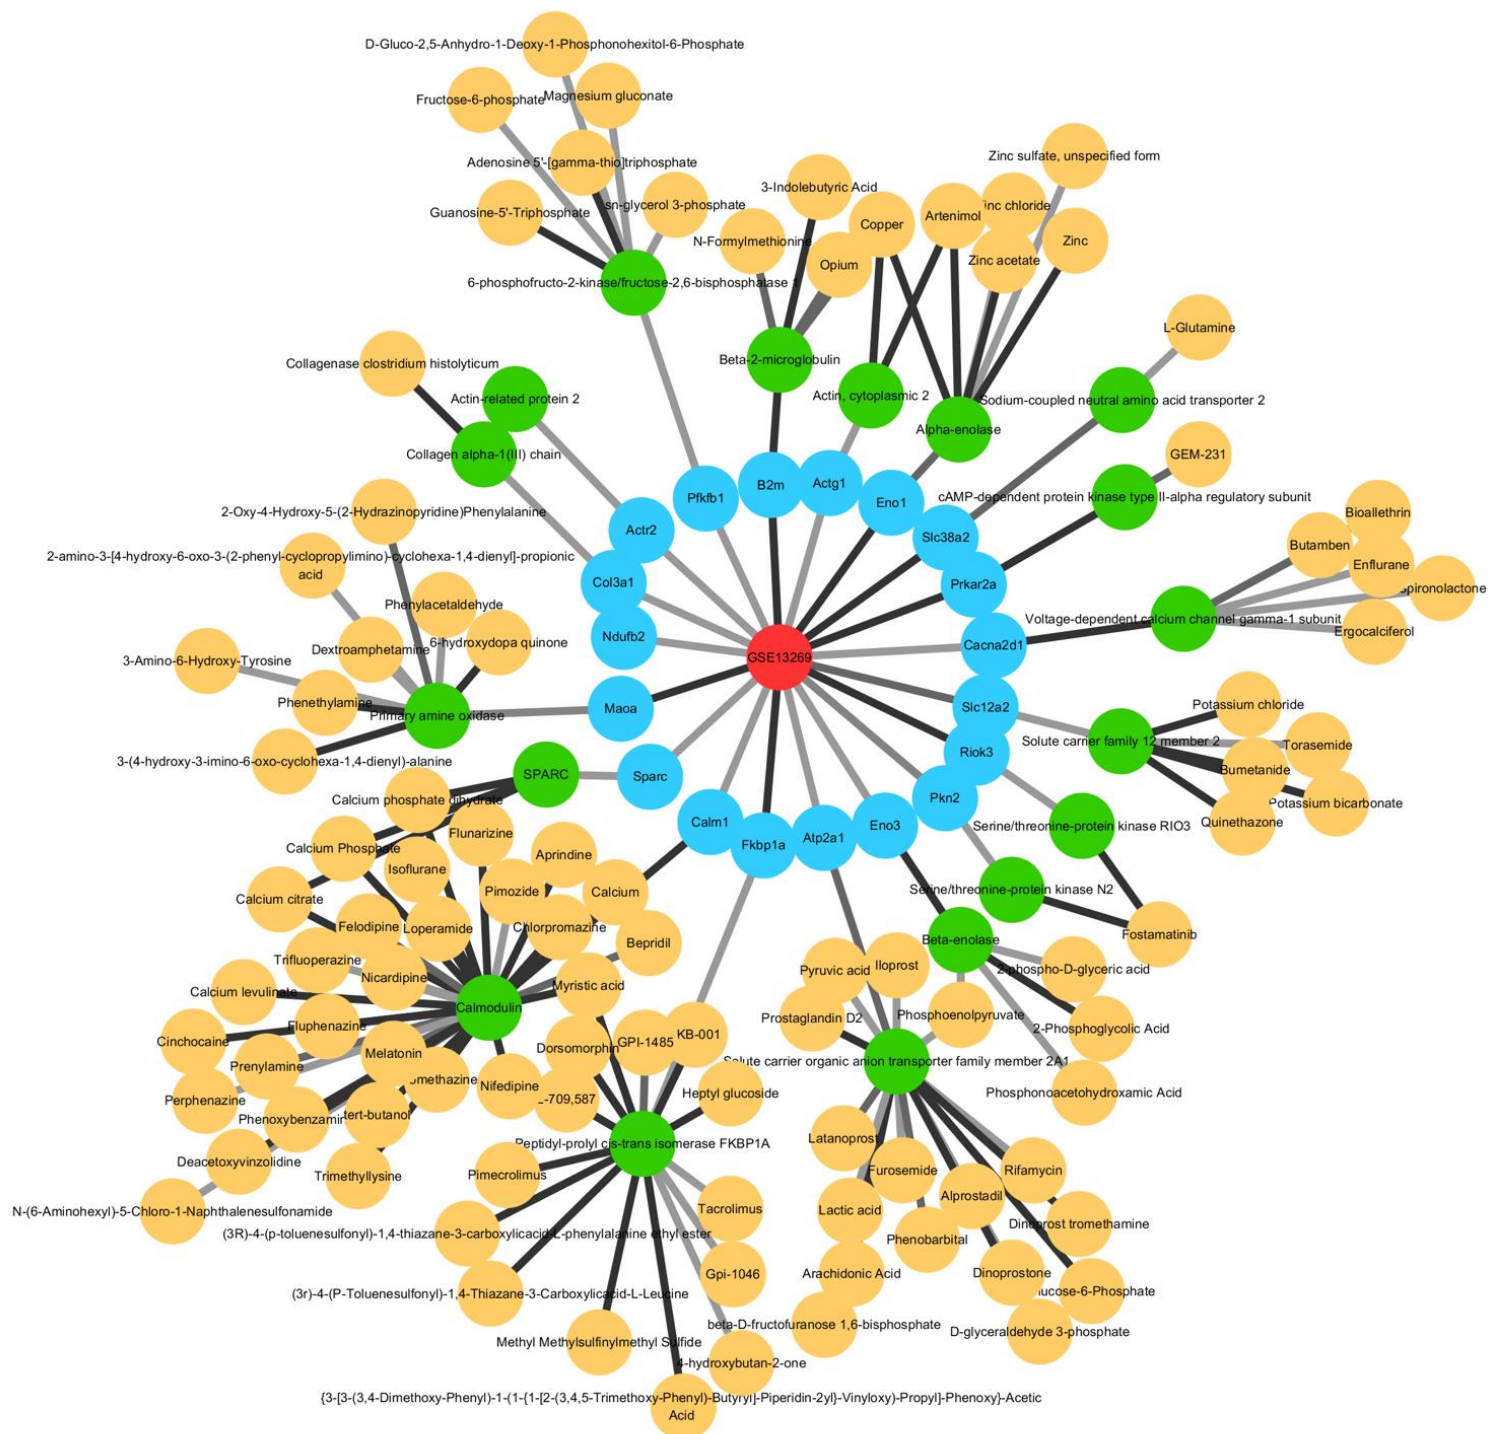

C

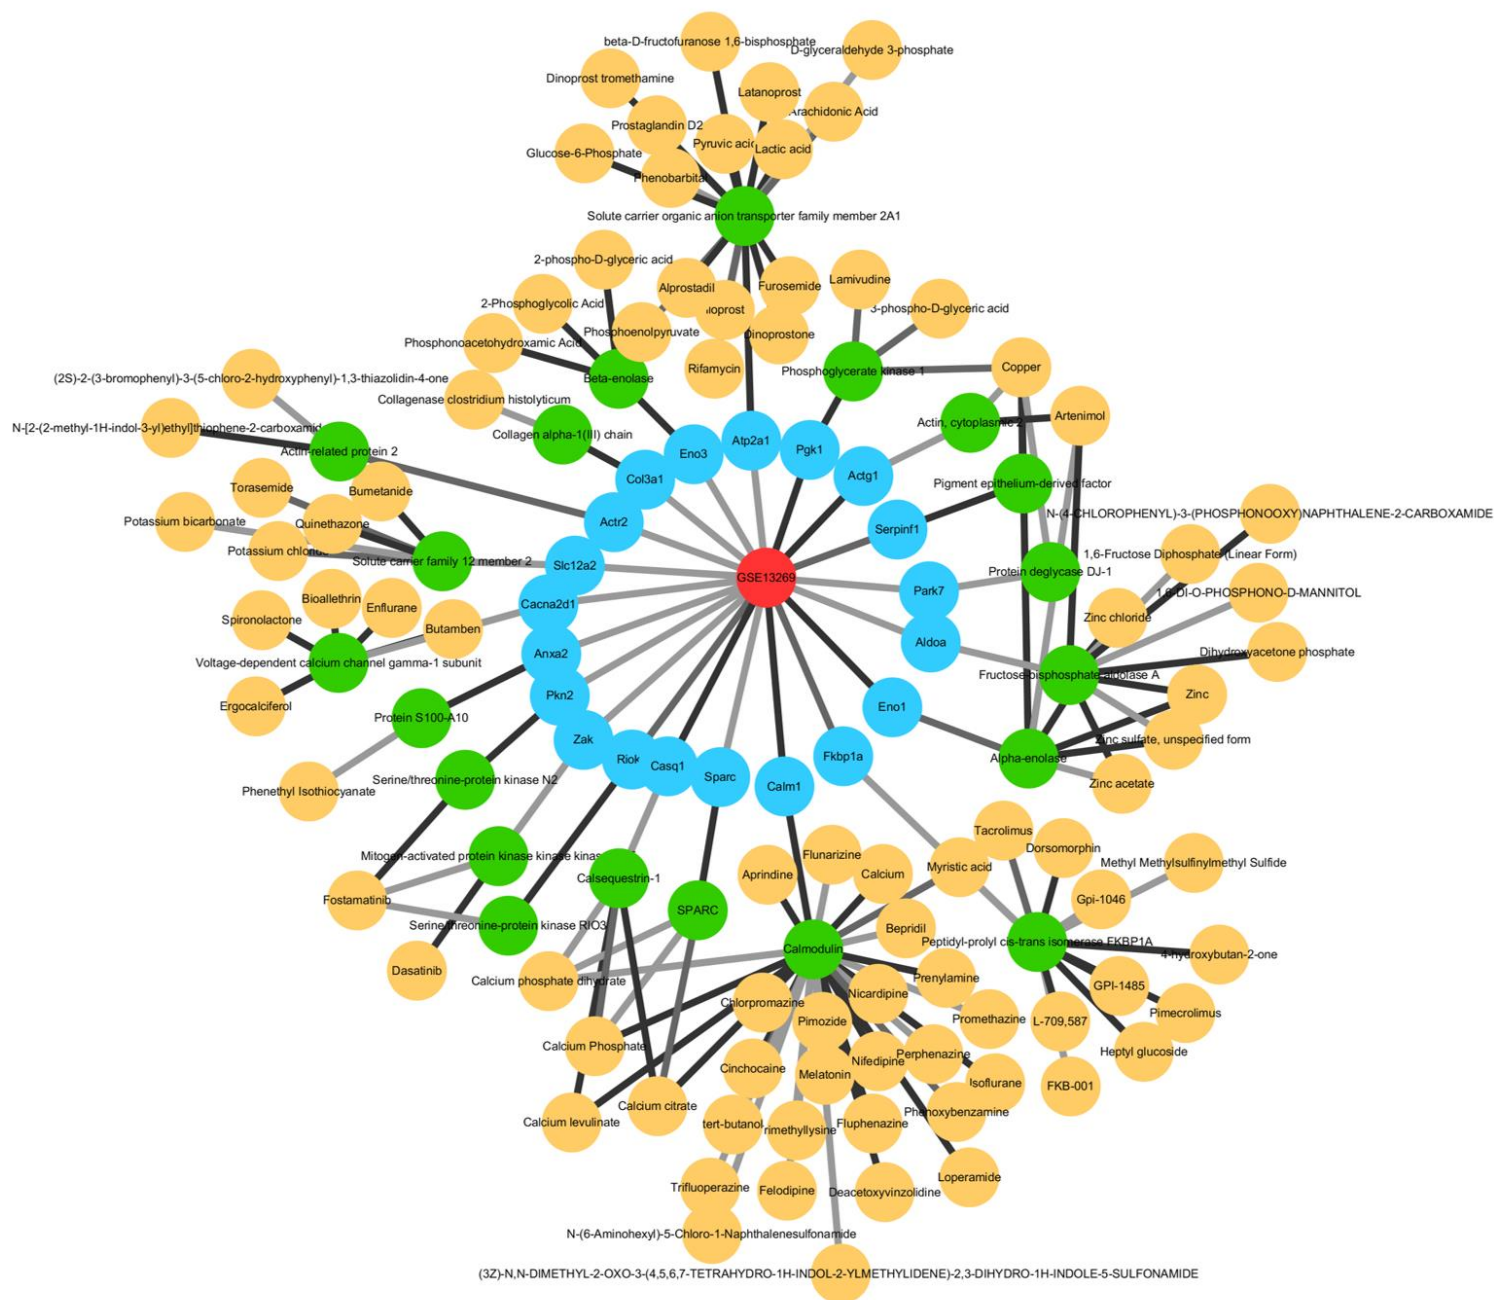

d

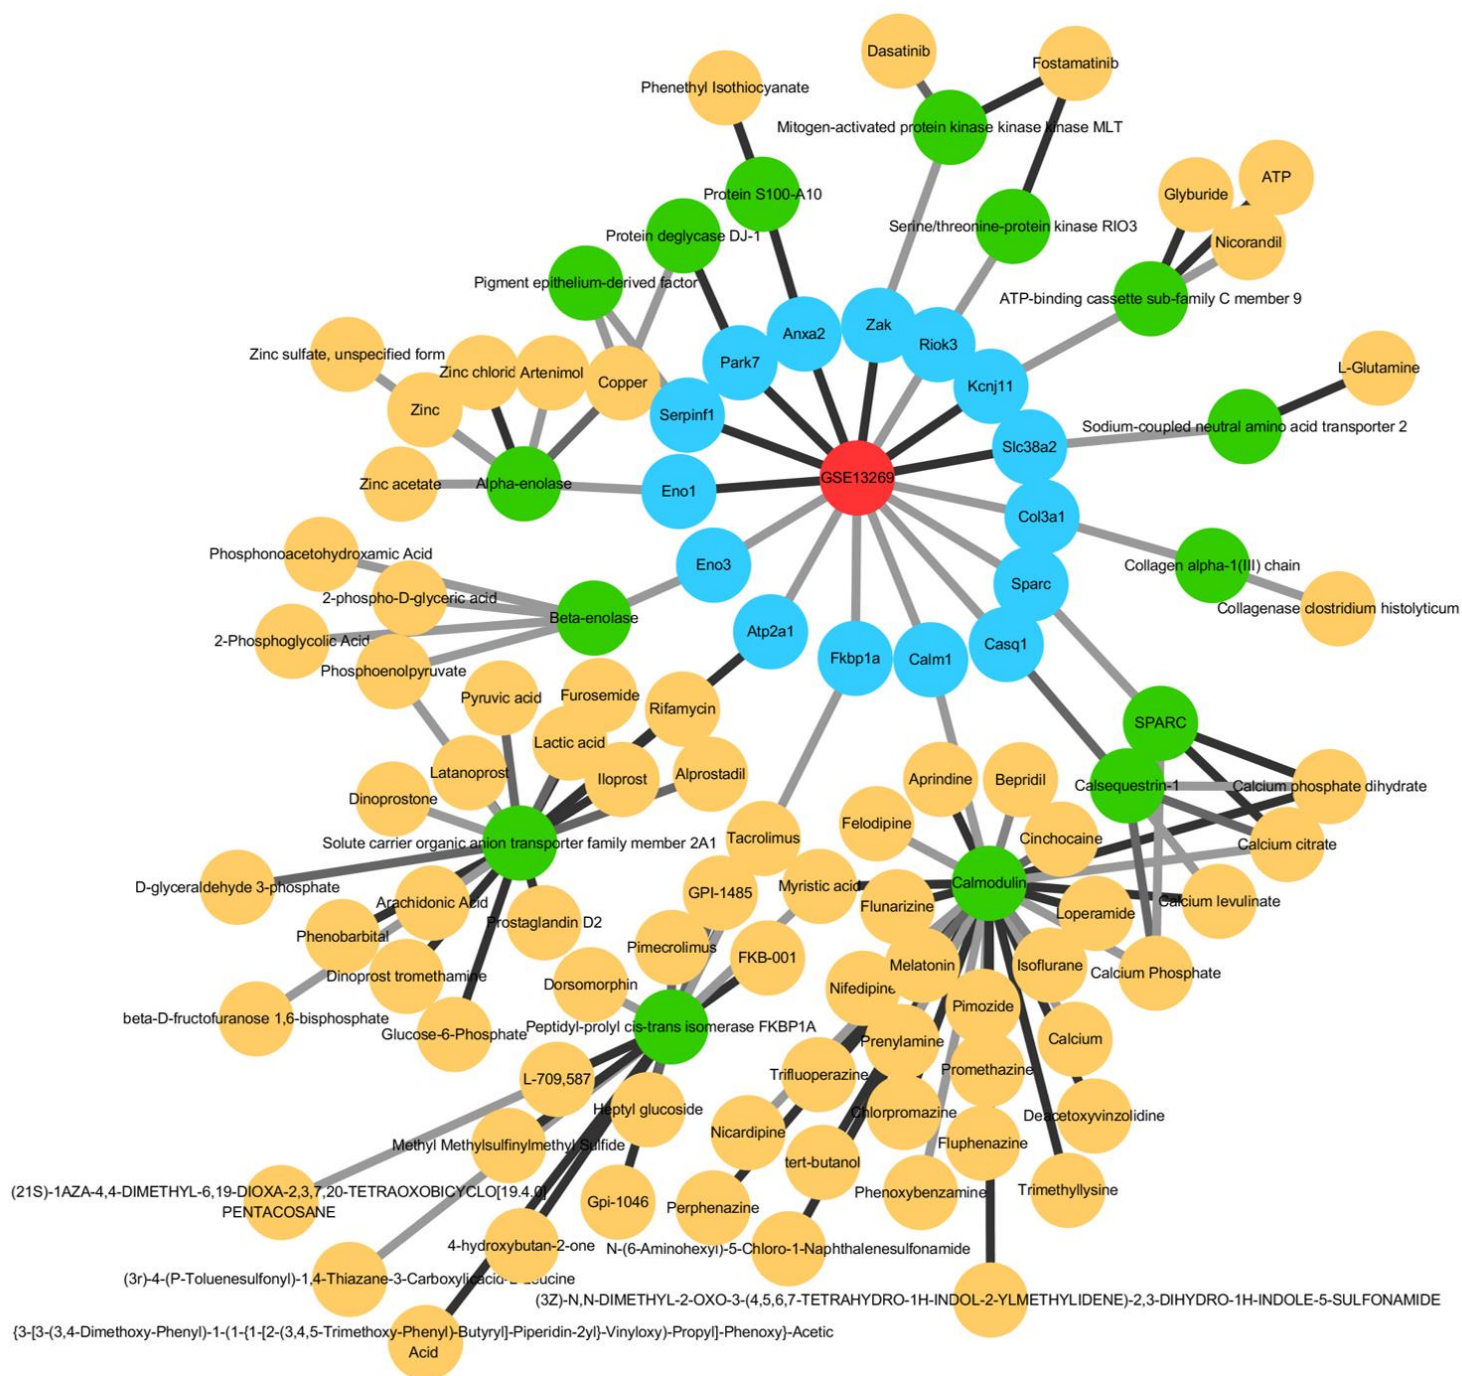

e

Figure S4: The drug target analysis for GSE13269, involving rat gastrocnemius muscle tissue. Drug targets, the corresponding proteins and targeted drugs at (a) stage I; (b) stage II; (c) stage III; (d) stage IV; (e) stage V.

In the first stage of GSE13269, the calsequestrin protein (CASQ) is involved in calcium chelation, storing and releasing calcium within cells, a process that has been shown to mediate the transport of glucose in muscles. CasQ' s gene CASQ1 is encoded in chromosome 1q21, a region that has been shown to be associated with type 2 diabetes in Amish people and several other populations [6]. The single-stranded nucleic acid-binding protein KHSRP (KH-type splicing regulatory protein) regulates the lifespan of RNA and its gene expression at different levels. KHSRP also controls important cellular functions such as proliferation, differentiation, metabolism, and response to infectious agents [7]. In the fourth stage of GSE13269, there is an *in vitro* protein that reduces the process of insulin-stimulated glucose uptake, glycogen incorporation and oxidation by increasing the signaling of the 5'-adenosine monophosphate-activated protein kinase AMPK, while stimulating fatty acid oxidation and incorporation into triglycerides, thereby reducing protein synthesis [8]. We also demonstrated *in vivo* function and effects on overall obesity with the common SERPINF1 variant rs12603825, where the secondary A allele represents plasma PEDF- and the risk of elevated body fat alleles [9].

### S5. Drug target analysis for GSE13270: Rat Liver: Rat Liver Tissue

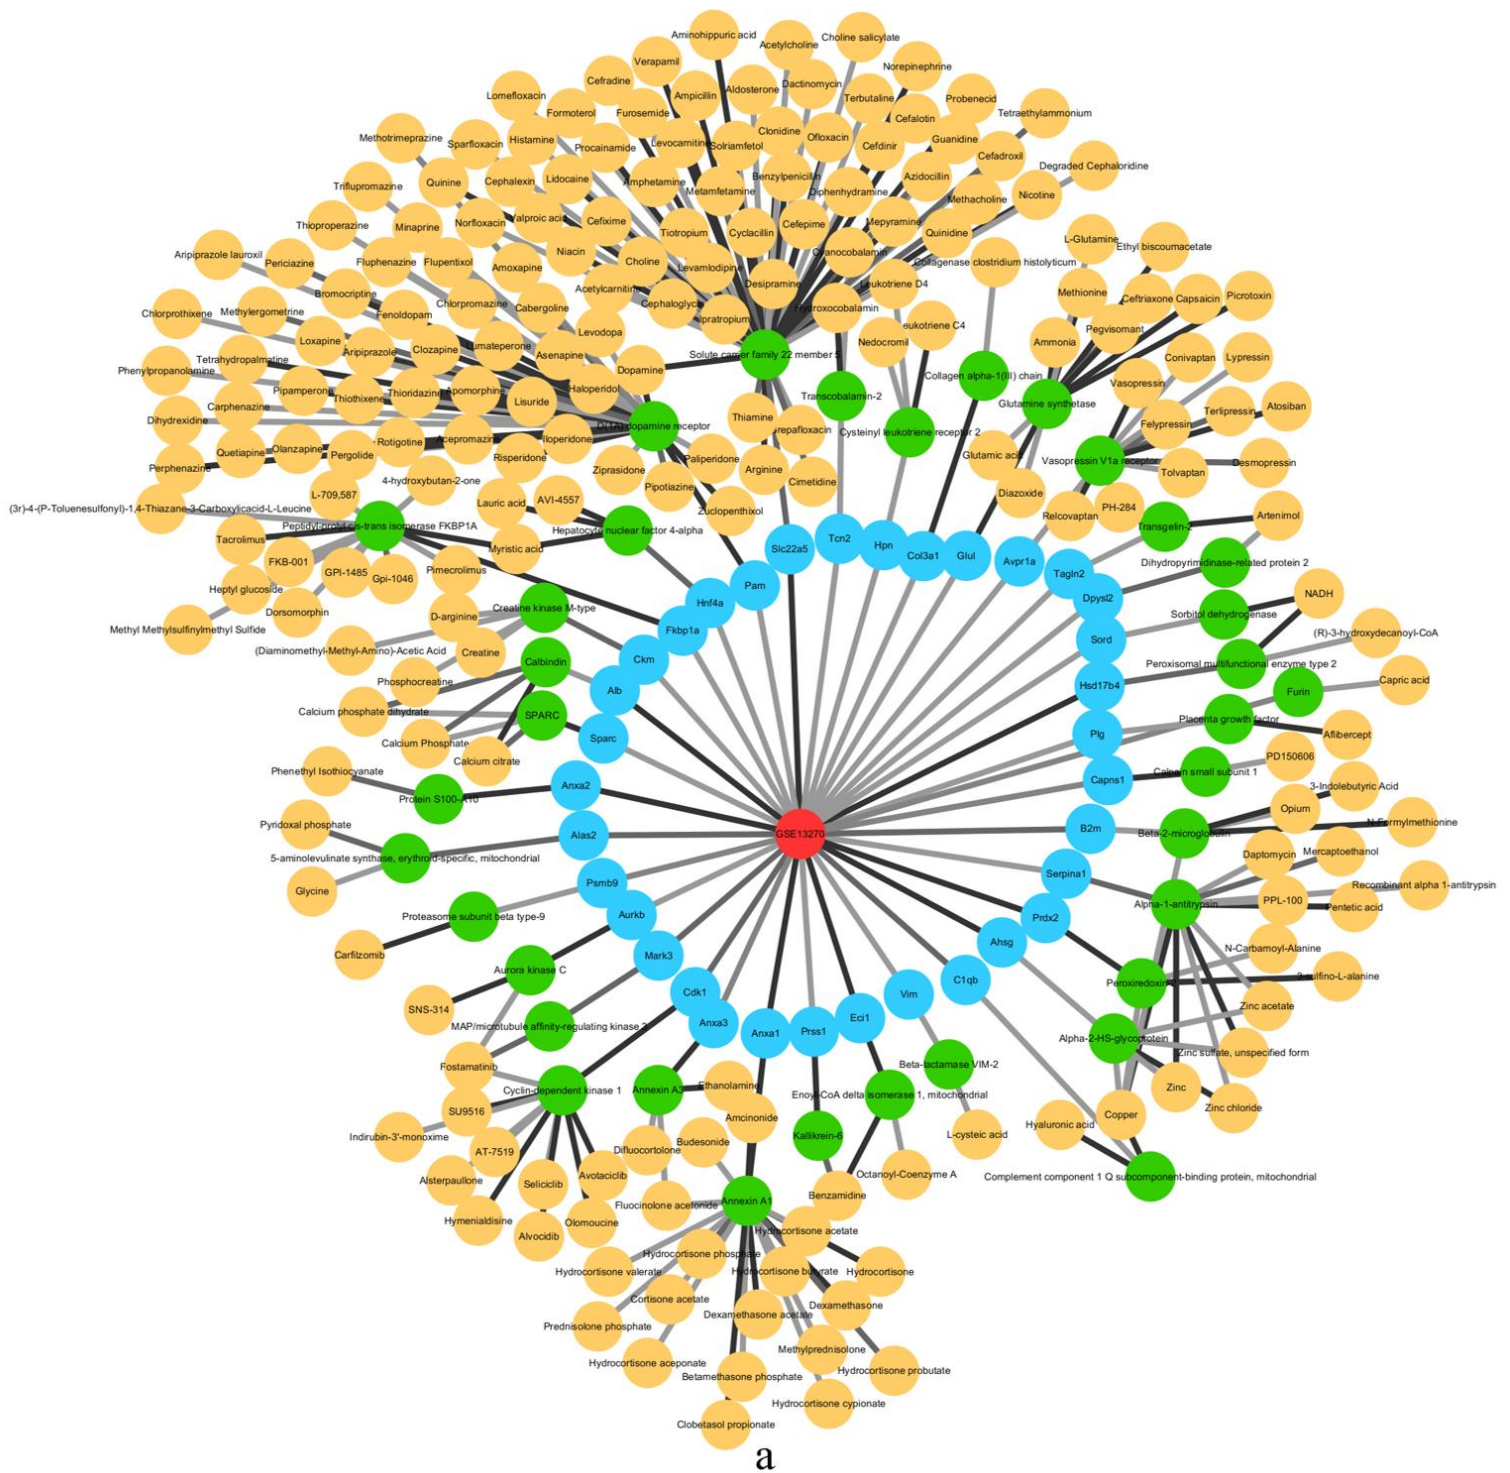



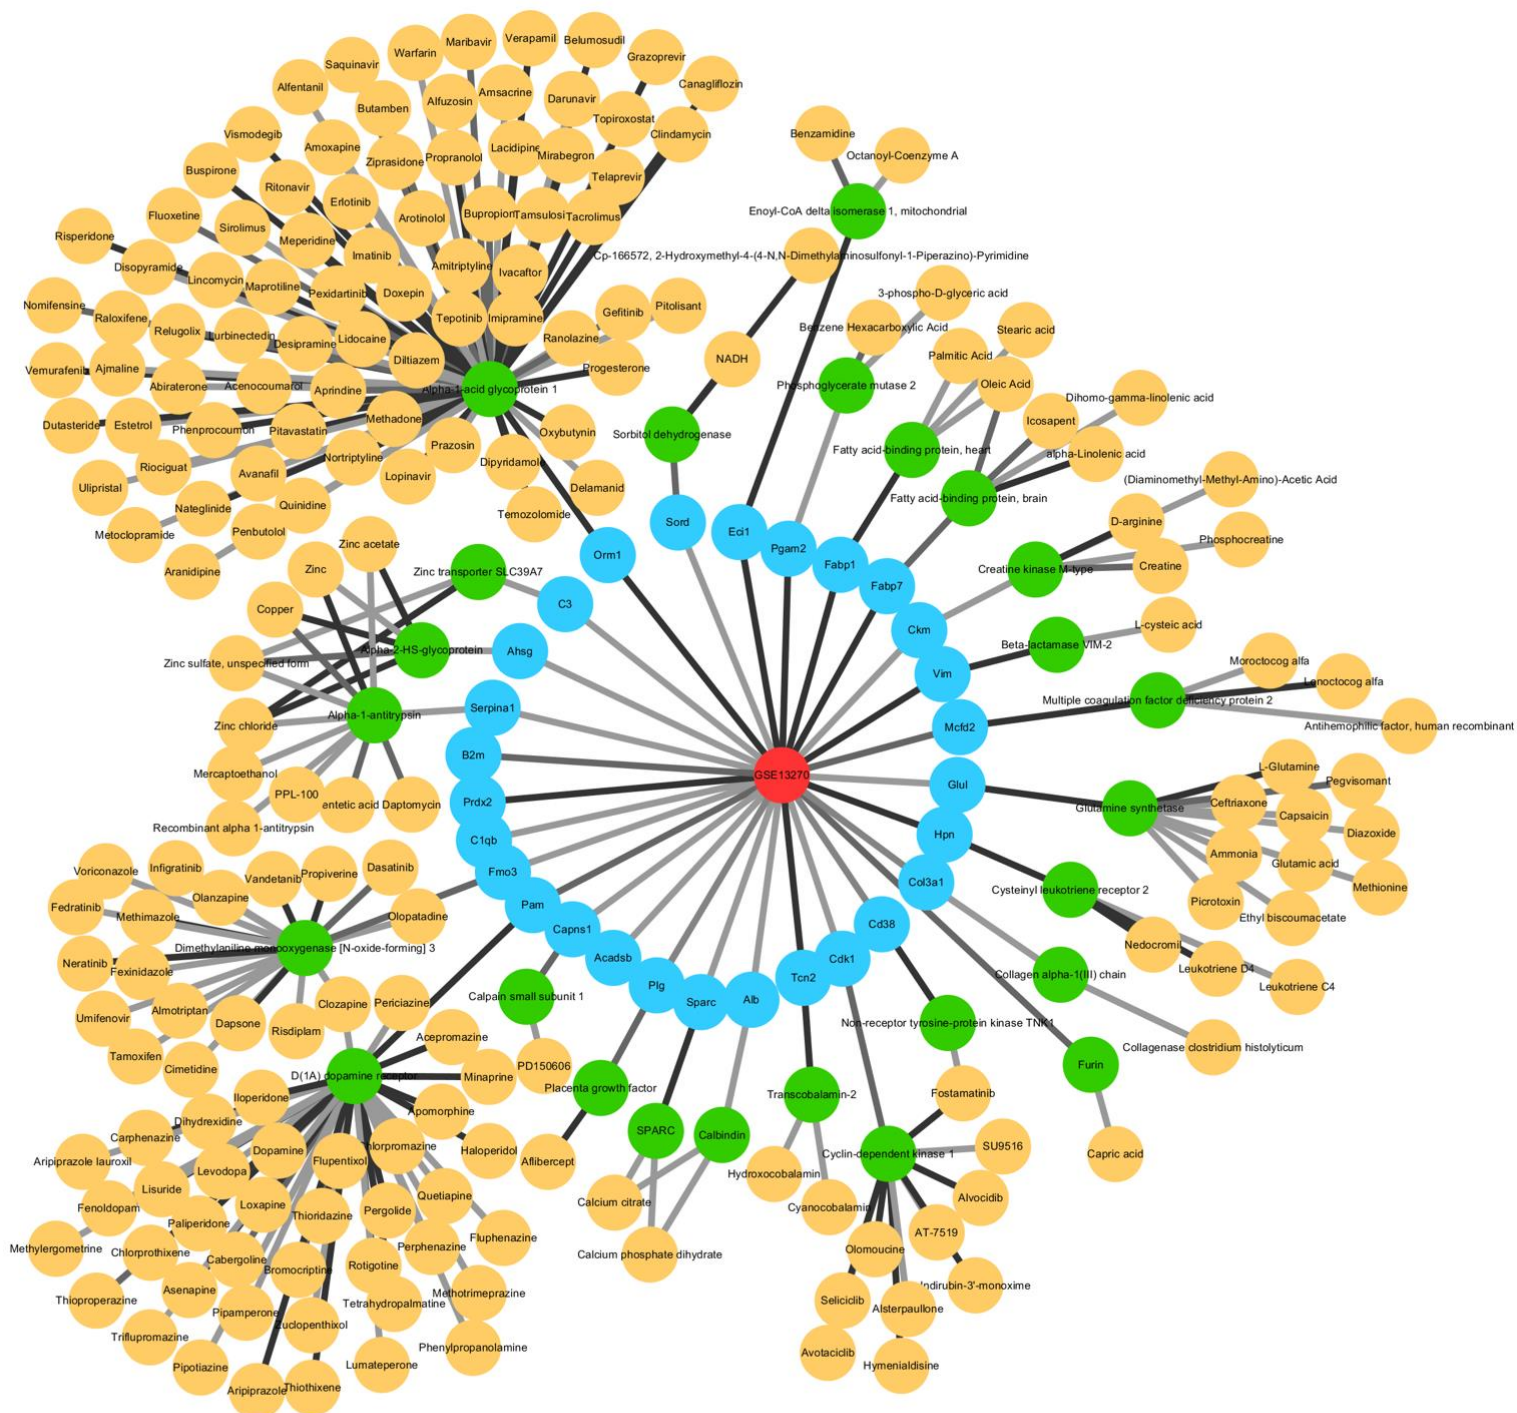

C

Figure S5: The drug target analysis for GSE13270, involving rat liver tissue. Drug targets, the corresponding proteins and targeted drugs at (a) stage II; (b) stage III; (c) stage V.

In addition, the stage I and the stage IV are critical stages, and the corresponding drug target map is put into the body of the paper and analyzed, so it will not be repeated here. The non-critical phase does not have to be analyzed.

## **S6. Enrichment Results and Analysis of GSE13269 (Rat Gastrocnemius Muscle Tissue) and GSE13270 (Rat Liver Tissue).**

For GK rat muscle, the biological processes related in 4 weeks mainly include muscle system process, response to stimulus, response to glucose, heart process, cellular response to glucose stimulus and PI3K-Akt signaling pathway, which are provided in Table S7 and Figure S6 (a). The biological processes in 16 weeks mainly include regulation of peptidase activity, negative regulation of phosphorylation, regulation of necrotic cell death, carbohydrate metabolic process, glycolysis/gluconeogenesis, HIF-1 signaling pathway, PI3K-Akt signaling pathway, proteoglycans in cancer and response to lipid, which are also provided in Table S7 and Figure S6 (a). For PI3K-Akt signaling pathway, the gene Sirt1 participates in diabetic myocardial injury and the occurrence and development of early diabetic cardiomyopathy by negatively regulating PI3K/Akt/MTOR signaling pathway [10]. Previous studies through cell transfection and other experiments have shown that HIF-1 $\alpha$ /KIM1 signaling pathway can participate in the process of renal fibrosis in diabetic nephropathy by regulating the expression of KIM1 in renal tubular epithelial cells in high glucose environment. HIF-1 $\alpha$  is the key transcription factor of oxygen homeostasis regulation, which can make the body adapt to the external environment oxygen by regulating the expression of target genes. The expression levels of HIF-1 $\alpha$ , KIM1, COL-1mRNA and protein in kidney of diabetic rats are significantly increased, suggesting that diabetic nephropathy model is accompanied by changes of HIF-1 $\alpha$ /KIM1 pathway in kidney [11]. For some genes in DNB, PRDX2 has been found to participate in the oxidative stress process through a variety of signaling pathways. The hypoxia environment caused by it leads to the increase of reactive oxygen species. In order to survive in a high level of reactive oxygen species, cells need to increase antioxidants, so the expression of related factors, including PRDX2 protein, has changed. Previous studies suggest that overexpression of PRDX2 can protect pancreatic cell apoptosis induced by oxidative stress and reduce the risk of diabetes [12]. Some studies [13,14] believe that SPARC is an autocrine and/or paracrine factor of adipose tissue, which can inhibit the fat formation. Other studies [15] show that insulin can increase the expression of SPARC, while SPARC can increase the phosphorylation of AKT and PI3-K, indicating that SPARC may be involved in insulin signaling pathway [16].

For GK rat liver, the biological processes in 4 weeks mainly include response to hormone, inflammatory response, response to interleukin-1, metabolism of xenobiotics by cytochrome P450, AGE-RAGE signaling pathway in diabetic complications and protein digestion and absorption, which are provided in Table S7 and Figure S6 (b). The biological processes in 16 weeks mainly include liver development, regulation of secretion, cellular lipid metabolic process, vitamin A metabolic process, regulation of cellular protein metabolic process, PPAR signaling pathway and AGE-RAGE signaling pathway in diabetic complications, which are also provided in Table S7 and Figure S6 (b). Vitamin A is required for PSC (a lipid storage cell, which is normally in a resting state) to maintain a resting state. Vitamin A and its metabolites can inhibit the expression of resting and activated pancreatic stellate cells  $\alpha$ -SMA [17]. The peroxisome proliferator-activated receptors (PPARs) modulate several biological processes that are perturbed in obesity, including inflammation, lipid and glucose metabolism and overall energy homeostasis. And PPARs regulate the functions of adipose tissues, such as adipogenesis, lipid storage and adaptive thermogenesis [18]. For the AGE-RAGE signaling pathway, moderate intensity aerobic exercise inhibits its AGE-RAGE axis and NF- $\kappa$ B pathway, which may decrease oxidative stress and inflammation, and so reduce tissue injury for the prevention and treatment of complications of the T2DM [19]. For some genes in DNB, CD74 receptor and other

mechanisms are stimulated by multi effect cytokine MIF to promote inflammatory response in glomerular podocytes. MIF can activate CD74 on the surface of local glomerular podocytes, resulting in the phosphorylation of extracellular signal regulated kinase 1/2 (ERK1/2) and p38MAPK [20]. SPARC is an autocrine and paracrine factor of adipose tissue, which can inhibit adipogenesis. Insulin can increase SPARC expression, while SPARC can increase Akt and P13-K phosphorylation, indicating that SPARC may be involved in insulin signaling pathway [21]. The overexpression of PRDX2 can protect pancreatic  $\beta$  cell apoptosis induced by oxidative stress and reduce the risk of diabetes. The changes of oxidative stress in diabetic kidney disease and other pathological processes are related to the expression of PRDX2 and related pathways. For example, PRDX2 can participate in the regulation of tumor development and oxidative stress in treatment through P13 AKT-resistant pathway. PRDX2 can regulate the oxidative stress of colon cancer cells through Wnt/B-catenin signaling pathway and influence the oxidative stress of tumor by regulating some microRNA [22].

**Table S7.** Enrichment results for DNBs of GSE13269 (rat gastrocnemius muscle tissue) and GSE13270 (rat liver tissue) datasets.

| Tissue | Case               | Term       | P-value                | Term name                              |
|--------|--------------------|------------|------------------------|----------------------------------------|
| Muscle | Muscle<br>4 weeks  | GO:0003012 | $1.05 \times 10^{-5}$  | Muscle system process                  |
|        |                    | GO:0050896 | 0.0067                 | Response to stimulus                   |
|        |                    | GO:0009749 | 0.0121                 | Response to glucose                    |
|        |                    | GO:0003015 | 0.0334                 | Heart process                          |
|        |                    | GO:0071333 | 0.0351                 | Cellular response to glucose stimulus  |
|        |                    | GO:0042593 | 0.0458                 | Glucose homeostasis                    |
|        |                    | rno04260   | $3.72 \times 10^{-8}$  | Cardiac muscle contraction             |
|        |                    | rno00190   | $1.95 \times 10^{-7}$  | PI3K-Akt signaling pathway             |
|        | Muscle<br>16 weeks | GO:0052547 | 0.0048                 | Regulation of peptidase activity       |
|        |                    | GO:0042326 | 0.0117                 | Negative regulation of phosphorylation |
|        |                    | GO:0010939 | 0.0176                 | Regulation of necrotic cell death      |
|        |                    | GO:0005975 | 0.0239                 | Carbohydrate metabolic process         |
|        |                    | rno00010   | 0.00045                | Glycolysis / Gluconeogenesis           |
|        |                    | rno04066   | 0.0075                 | HIF-1 signaling pathway                |
|        |                    | rno04151   | 0.0092                 | PI3K-Akt signaling pathway             |
|        |                    | rno05205   | 0.0213                 | Proteoglycans in cancer                |
| Liver  | Liver<br>4 weeks   | GO:0033993 | $1.63 \times 10^{-11}$ | Response to lipid                      |
|        |                    | GO:0009725 | $5.36 \times 10^{-9}$  | Response to hormone                    |
|        |                    | GO:0006954 | 0.0002                 | Inflammatory response                  |

|                   |            |         |                                                      |
|-------------------|------------|---------|------------------------------------------------------|
| Liver<br>16 weeks | GO:0002443 | 0.00033 | Leukocyte mediated immunity                          |
|                   | GO:0070555 | 0.0292  | Response to interleukin-1                            |
|                   | rno00980   | 0.0172  | Metabolism of xenobiotics by cytochrome P450         |
|                   | rno04933   | 0.0369  | AGE-RAGE signaling pathway in diabetic complications |
|                   | rno04974   | 0.0438  | Protein digestion and absorption                     |
|                   | GO:0001889 | 0.00075 | Liver development                                    |
|                   | GO:0051046 | 0.0056  | Regulation of secretion                              |
|                   | GO:0044255 | 0.0208  | Cellular lipid metabolic process                     |
|                   | GO:0006776 | 0.0336  | Vitamin a metabolic process                          |
|                   | GO:0032268 | 0.0473  | Regulation of cellular protein metabolic process     |
|                   | rno03320   | 0.0039  | PPAR signaling pathway                               |
|                   | rno04933   | 0.0077  | AGE-RAGE signaling pathway in diabetic complications |
|                   | rno00982   | 0.0098  | Drug metabolism - cytochrome P450                    |

---

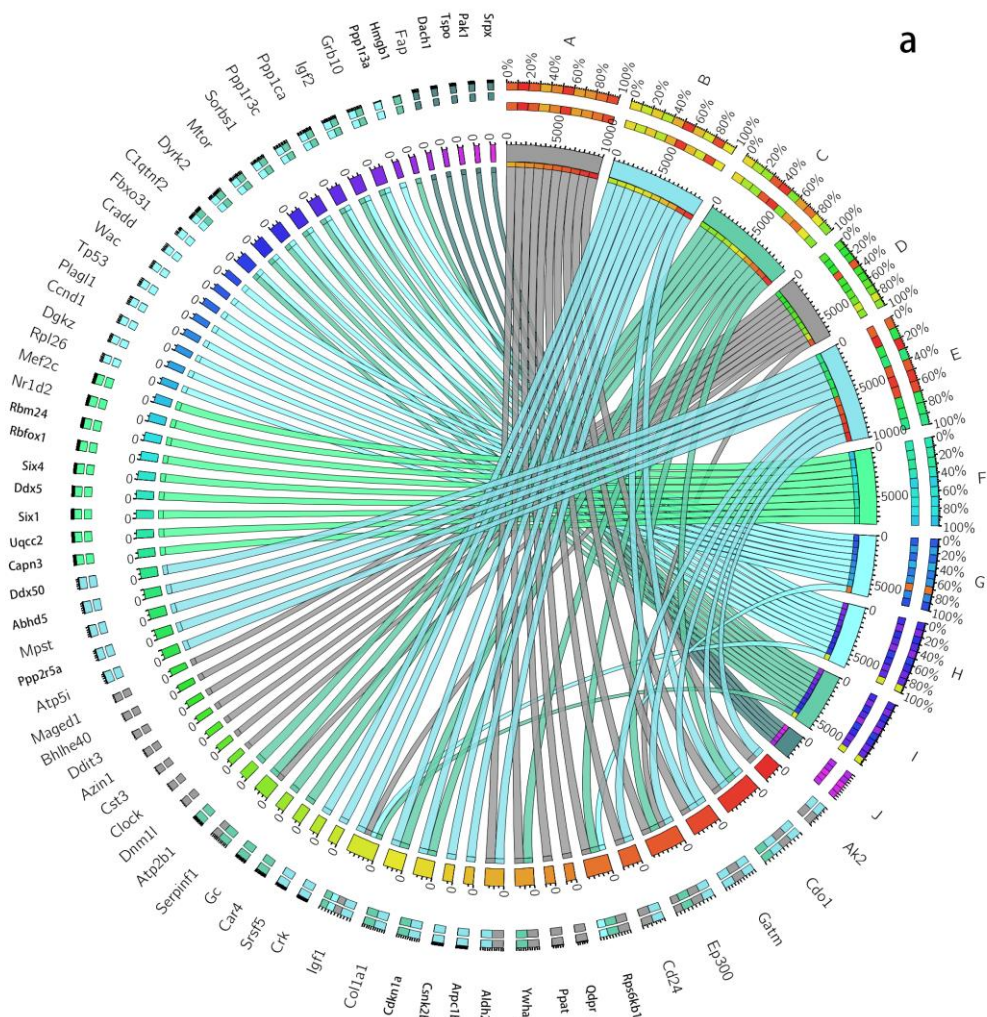

- A. Response to hormone
- B. Response to peptide hormone
- C. Response to steroid hormone
- D. Rhythmic process
- E. Metabolic process
- F. Regulation of skeletal muscle cell differentiation
- G. G1 DNA damage checkpoint
- H. Regulation of glycogen biosynthetic process
- I. Regulation of glycogen metabolic process
- J. Contact inhibition

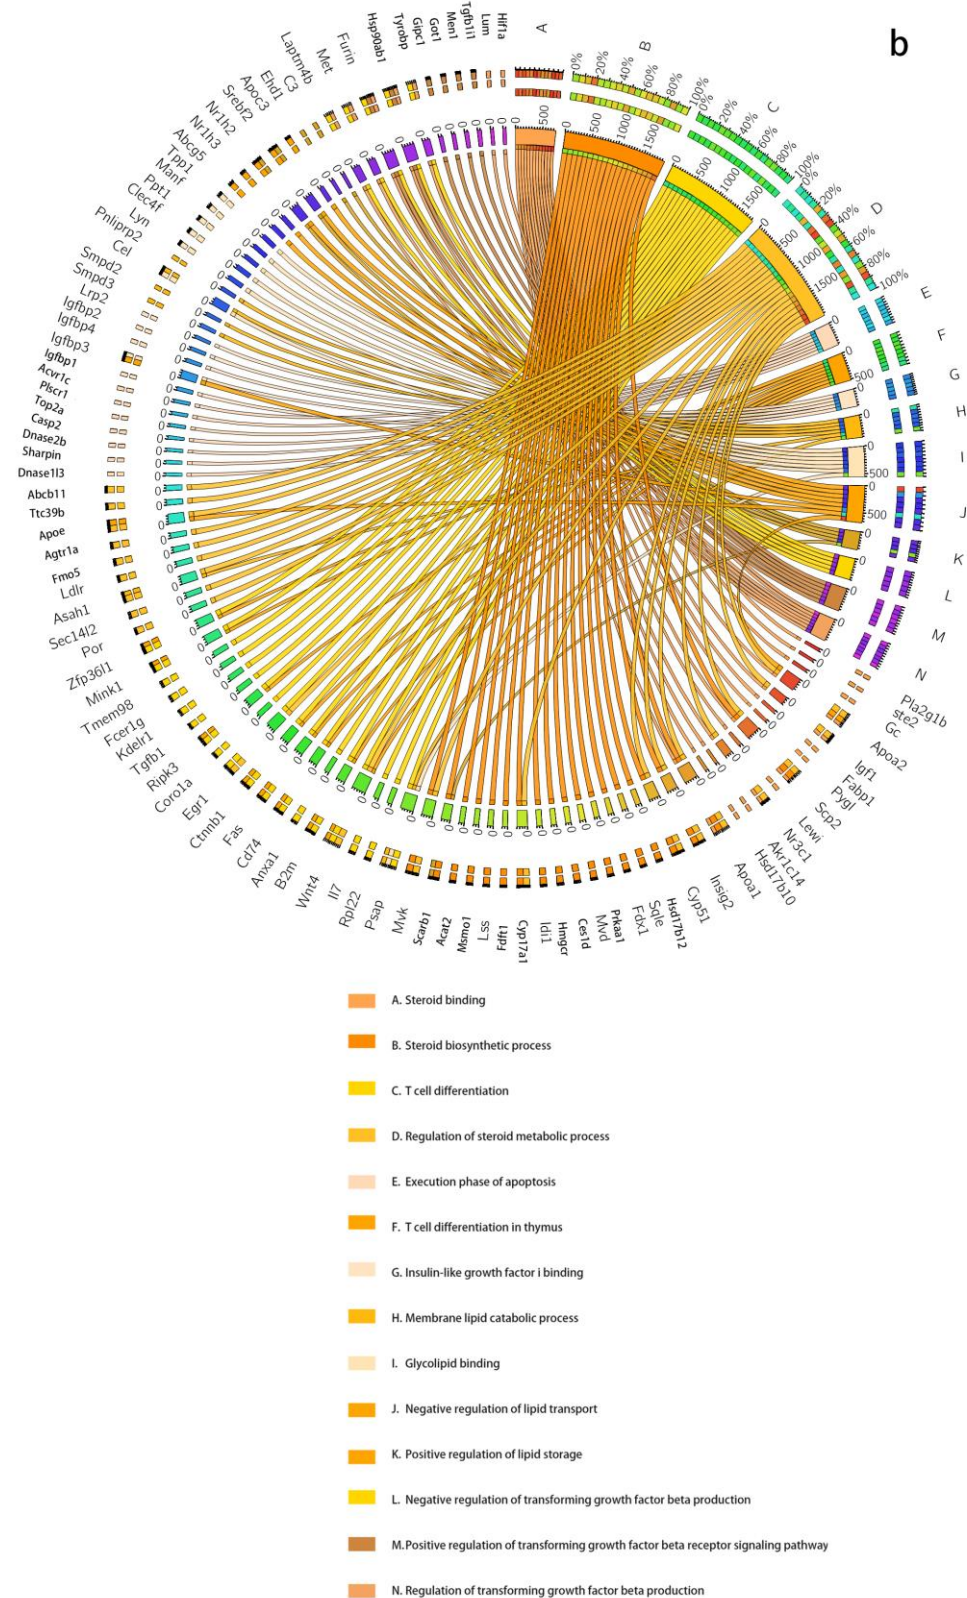

## References

- [1] Dai, H.; Li, L.; Zeng, T.; Chen, L. Cell-specific network constructed by single-cell RNA sequencing data. *Nucleic Acids Res.* 2019, 11.
- [2] Johnson J.M.; Edwards, S.; Shoemaker, D.; Schadt E.E. Dark Matter in the Genome: Evidence of Widespread Transcription Detected by Microarray Tiling Experiments. *Trends Genet* 2005, 21, 93–102.
- [3] Lin, G.; Wan, X.; Liu, D.; Wen, Y.; Yang, C; Zhao, C. COL1A1 as a potential new biomarker and therapeutic target for type 2 diabetes. *Pharmacol Res.* 2021, 165, 105436.
- [4] Wang, X.; Lu, J. Effect of blood glucose fluctuation on the prognosis of diabetes and the occurrence and development of chronic complications. *Section Endocrinol Foreign M ed Sci* 2005, 25.
- [5] Hoshino, F.; Murakami, C.; Sakai, H.; Satoh, M.; Sakane, F. Creatine kinase muscle type specifically interacts with saturated fatty acid-and/or monounsaturated fatty acid-containing phosphatidic acids. *Biochem. Biophys. Res. Commun.* 2019, 513, 1035-1040.
- [6] Fu, M.; Damcott, C.M.; Sabra, M.; Pollin, T.I.; Ott, S.H.; Wang, J; Garant, M.J.; O'connell, J.R.; Mitchell, B.D.; Shuldiner, A.R. Polymorphism in the Calsequestrin 1 (CASQ1) Gene on Chromosome 1q21 Is Associated with Type 2 Diabetes in the Old Order Amish. *Diabetes* 2004, 53, 3292-3299.
- [7] Briata, P.; Bordo, D.; Puppo, M.; Gorlero, F.; Rossi, M.; Perrone-Bizzozero, N.; Gherzi, R. Diverse roles of the nucleic acid-binding protein KHSRP in cell differentiation and disease. *Wiley Interdiscip Rev RNA* 2016, 7, 227-240.
- [8] Ruby, M.A.; Riedl, I.; Massart, J.; M Åhlin.; Zierath, J.R. Protein kinase N2 regulates AMP kinase signaling and insulin responsiveness of glucose metabolism in skeletal muscle. *Am J Physiol Endocrinol Metab.* 2017, 313, 483-491.
- [9] Anja, B.; Anna-Maria, O.; M Jürgen.; Mratin, H.; Caroline, K.; Fausto, M.; Fritz, S.; Norbert, S.; Andreas, F.; Hans-Ulrich, H. Common genetic variation in the SERPINF1 locus determines overall adiposity, obesity-related insulin resistance, and circulating leptin levels. 2012, 7, e34035.
- [10] Sun, X.H.; Wang, Y.; Mou, Y. Alteration of PI3K/Akt/mTOR signaling during development of diabetic cardiomyopathy and regulation of SIRT1. *Chinese Pharmacol. Bull.* 2017, 33, 793-798.
- [11] Liu, J.; Hu, C.; Li, H.; Wang, W.; Zhang, W.; Niu, C.; Chen, M. Based on Kim1 / HIF - 1  $\alpha$  Signaling pathways explore the mechanism of kidney injury in diabetic rats. *Chinese Journal of Integrated Traditional and Western Nephrology* 2020, 21, 786-788.
- [12] Yao, J.; Jiang, A.; Wang, L.; Wei, F.; Chen, H.; Yu, H.; Meng, J. Triptolide upregulated PRDX2 inhibits oxidative stress in type 2 diabetic nephropathy. *Journal of Tianjin Medical University* 2019, 25, 466-470.
- [13] Jing Nie. E; Helence Sage. SPARC functions as all inhibitor of adipogenesis . *J Cell Commun Sigmal* 2009,3,247-254 .
- [14] Kos, K.; Wong S.; Tan B. et al. Regulation of the fibrosis and angiogenesis

promoter sparc/osteonectin in human adipose tissue by weight change, leptin, insulin, and glucose . *Diabetes* 2009, 58, 1780-1788 .

- [15] Shi, Q.; Bao S.; Maxwell J.A.; et al . Secreted protein acidic, rich in cysteine (SPARC), mediates cellular survival of gliomas through AKT activation . *J Biol Chem* 2004, 279, 52200—52209 .
- [16] Jia, G.; Di, F.; Wang, L.; Yu, H.; Li, X. Association between the serum SPARC and FGF21 levels in newly diagnosed T2DM patients. *China Diabetes journal* 2013, 21, 223-225.
- [17] She, Y.; Gong, W.; Yu, J. Effect of Vitamin A on Islet Fibrosis in Type 2 Diabetes Mellitus Animal Model. *Laboratory Animal Science and Administration* 2015, 32, 17-20.
- [18] Gross, B.; Pawlak, M.; Lefebvre, P.; Staels, B. PPARs in obesity-induced T2DM, dyslipidaemia and NAFLD. *Nature reviews. Endocrinology* 2017, 13, 36-49.
- [19] Shen, Z.; Zhu, L.; Xu, W. Effects of aerobic exercise on AGE-RAGE axis and NF- $\kappa$ B pathway in type 2 diabetic rats. *Kunming Med. Univ.* 2018, 39, 16-19.
- [20] Liu, J.; Ye, S.; Bi, S.; Zhou, W. Effect of metformin on the expression of macrophage migration inhibitory factor and its receptor CD74 in renal tissue of type 2 diabetic rats. *Acta Universitatis Medicinalis Anhui* 2021, 56, 5.
- [21] Jia, G.; Di, F.; Wang, L.; Yu, H.; Li, X. Correlation between serum SPARC and FGF21 levels in patients with new type 2 diabetes mellitus. *Chin J Diabetes* 2013, 21, 5.
- [22] Yao, J.; Jiang, A.; Wang, L.; Wei, F.; Chen, H.; Yu, H.; Meng, J. Triptolide upregulates PRDX2 and inhibits oxidative stress in type 2 diabetic nephropathy. *Tianjin Med. Univ.* 2019, 25, 5.
