# Supplementary material for: Detecting the Critical States of Type 2 Diabetes Mellitus Based on Degree Matrix Network Entropy by Cross-Tissue Analysis
Source: Entropy (Basel). 2022 Sep 5;24(9):1249. doi: 10.3390/e24091249 (PMC9498060; doi:10.3390/e24091249)
Supplement: Supplementary file 1 [file entropy-24-01249-s001.zip › Supplementary Table S1.xlsx]

## Sheet: Name
The DNBs of critical states of T2DM

## Sheet: 13268_DNBs
state		8 weeks
		Nomo1
		Ankrd13c
		Psat1
		Nos3
		Cdk16
		Lmo2
		Idh1
		Tkt
		Kcnb1
		Cfl1 /// LOC688430
		RGD1303130
		Phip
		Ugt2b15
		Plbd2
		Arpc4
		Cmbl
		Tspan31
		Scarb1
		Retsat
		Birc5
		Rbl2
		Dpagt1
		Abcc5
		Pea15
		LOC100910831 /// Syvn1
		Aaed1
		Rpl23a
		Rap1b
		Surf4
		Fabp1
		Atp6ap1
		Cyba
		Pros1
		ND3
		Eef2
		Hyal3
		Psmb9
		Dgkh
		Tgm2
		Cebpa
		Tst
		Comt
		Gna12
		Ctdsp1
		Tnfaip1
		Ubn1
		Acads
		C4bpa
		S100a8
		Ece1
		Lyrm5
		Grina
		Nfam1
		Ccr5
		Pld4
		Mrpl16
		RGD1565395 /// Stmn1
		Glul
		Agrn
		ND2
		Ambp
		C1qb
		CYTB
		Spp1
		Pdcl3
		Hpx
		Apoa4
		Adrm1
		Ccnd3
		Mapk6
		Plg
		Nfia
		Bckdha
		Por
		Alas2
		Fgg
		Ctss
		Fam92a1
		Rab14
		Fkbp4
		Cbr4
		Letm1
		Slc24a6
		Ywhab
		Papd5
		Oxr1
		Rgs7
		Gnai2
		Slco2a1
		Fcer1g
		LOC100910973
		Anxa7
		Ppil1
		Lrig1
		LOC685707
		Lrig3
		Furin
		Rnf115
		Ube2n
		Dpysl2
		Ccdc80
		Rbp4
		Dap
		Epg5
		Mest
		Smad3
		RGD1306063
		Ect2
		Aif1
		Napsa
		Rup2
		Rhot1
		Cxcl1
		Ccna2
		Apoc1 /// LOC100911905
		Gnai1 /// Gnai3
		Ndufv3
		Ring1
		Pfdn2
		Prlr
		LOC100911597 /// Myh9
		Nup210
		Vim
		Fxyd5
		Mki67
		Ran
		Cd74
		LOC100910545 /// LOC100910589 /// LOC100910706 /// LOC690757 /// Sept7
		Dvl1
		Ubl7
		Hsd17b12
		Atp8b1
		Coq7
		Vapb
		Epn1
		Ccnb1
		Col3a1
		Mlf2
		Mark3
		Ifitm1
		Nuf2
		Psmb8
		Acox1 /// LOC100910385
		RGD1309676
		Ahcyl2
		Apoe
		Nucb1
		Cd4
		Pcolce
		Magt1
		Cdca3
		Mvd
		Gpam
		Mrps25
		Gnas
		Prkcb
		IgG-2a
		Glud1
		Lum
		Pfkl
		Cst3
		LOC100359493 /// LOC100359496 /// LOC100361392 /// LOC100361596 /// LOC100361620 /// LOC100364435 /// LOC100909821 /// LOC100911590 /// Tmsb10
		LOC100912469 /// Scd
		Fgl2
		Ubl5
		Eif1ax
		Arhgdib
		Tinagl1
		Mmadhc
		Lyz2
		Ptpn6
		Mrpl3
		Depdc1
		Ifitm2
		Ttr
		Lox
		Ap1ar
		Alb
		Dazap2
		Sparc
		Aurkb
		Gc
		Coro1a
		Slpi
		Pttg1
		Col1a1
		Selenbp1
		Plscr1
		Dync1li2
		Serpina1
		Lcp2
		Enpp2
		Cdk1
		Hbb
		Col1a2
		Laptm5
		Rnf111
		Cd53

## Sheet: 13269_DNBs
state	4 weeks		16 weeks
	Tmsb4x		Tmsb4x
	H19		Col3a1
	Col3a1		ND2
	LOC100364335		Pvalb
	Tcap		Sparc
	ND2		Lgals1
	LOC685186		Ifi27
	Ppp1r3c		Myl1
	Nrap		CYTB
	Rab12		Eno3
	COX1		Hacd1
	Actn3		Actn3
	Ppib		LOC685186
	Slc38a4		LOC100364335
	Sparc		Car3
	Mgp		Vezf1
	Eno3		COX1
	Ube2g1		Eno1
	LOC100910937		Arpc5l
	Cd81		Mrln
	Serpinh1		Serpinf1
	Ifi27		Nrap
	Myl1		Cd81
	Eno1		LOC100912619
	Pvalb		COX2
	Cav1		ND1
	Pcolce		Sypl2
	Mef2c		Rab12
	LOC100909752		Actr2
	Hhatl		Tnni2
	Col5a2		Ensa
	Car3		Casq1
	LOC100911252		LOC100910937
	Itgb1bp2		Usmg5
	Serpinf1		H19
	Cav3		Serpinh1
	Arpc5l		Itgb1bp2
	Hacd1		Ubxn2a
	Zfand3		Uaca
	Asb11		Suds3
	Tpm2		Cacna2d1
	Col6a3		Pgk1
	Cdkn1c		Dpt
	Usmg5		Shisa4
	Bzw1		Nudt4
	LOC100911590		Dlg1
	ND1		Bzw1
	Zak		Cdkn1c
	Six1		Riok3
	Col4a1		Anxa2
	Mybph		Alkbh5
	Nol3		LOC100911217
	Cacna2d1		Pcolce
	Ccdc80		LOC100910855
	Mfap5		Faf1
	Uaca		Socs6
	Mnat1		Mreg
	Dpt		Col5a2
	COX2		Tnnt3
	Lgals1		LOC100361008
	LOC100910017		Strn3
	Tnni2		Ak1
	Alkbh5		Mnat1
	Ubxn2a		LOC100911590
	Sec61b		Dstn
	Atp2a1		Ndufb9
	Aldoa		Nrdc
	Mia3		Ppp1r3c
	St3gal6		Ndufa4
	Pgk1		Sh3bgr
	LOC100912619		Mia3
	Tpm4		LOC100910861
	LOC102553715		Gpbp1
	Calm1		Atf4
	Ldha		Zfand3
	Strn3		Atp5j2
	Sorbs1		Aldoa
	Ensa		Eif4b
	Faf1		Col4a1
	Tfb2m		Col6a3
	Psme4		Fam127c
	Sumo3		Sumo3
	Dtnbp1		Ebag9
	Txn1		Heca
	Tnnt3		LOC100909752
	Golga4		Hn1
	Trim54		Postn
	Ipo5		Ddx3x
	Ctsh		Ddx23
	Zfp91		Slc38a4
	Kcnj11		Ifitm3
	Rilpl1		Cav3
	Postn		Lamp1
	Cd24		Timp2
	Pxdn		Akr1b1
	Ppp1r2		Col1a2
	LOC501718		Naa38
	Tab2		Ampd1
	Sypl2		Fkbp1a
	Cox4i1		Dtnbp1
	Fkbp1a		Mapt
	Vezf1		Hexim1
	Ddx3x		Kpna3
	LOC100361008		Atp2a1
	Slc25a4		Rilpl1
	Atp5c1		Golga4
	Kpna3		LOC689961
	Kat2b		LOC102553715
	Suds3		Tapt1
	Tarsl2		Zfp91
	Ebag9		Tarsl2
	Dlg1		Ap3d1
	Popdc2		LOC501718
	Anxa2		Ppib
	Rb1cc1		Park7
	Lamp1		Pnpla8
	Xpo7		Lum
	Actr2		Xpo7
	Fam127c		Nek7
	ND3		Cox6a2
	Neu2		Arl6ip5
	Arf4		LOC100909788
	CYTB		Hadhb
	Casq1		Ube2g1
	Pnpla8		Tab2
	Ndufb9		LOC100910017
	Atf4		Tmed9
	Anxa3		Zak
	Cul5		LOC100912618
	Rfx7		Tmem43
	Pkn2		Fbxl4
	Fbxo31		Actg1
	Slc12a2		Calm1
	Atp1b4		Slc12a2
	Shisa4		Acadm
	Tgm2		Six1
	Mitf		Hhatl
	Hn1		Rpl24
	Rexo4		LOC100363271
	Cdv3		LOC100909840
	Lum		Phf20l1
	Tmx4		Pkn2
	Ddx23		Ctsh
	Pde4d		Pabpc1
	Riok3		Cav1
	Socs6		Palld
	Cd48		Tpm1
	Myl6b		Asb11
	C1galt1		Sos2
	Col6a1		LOC100911343
	Gpbp1		Cd24
	Heca		LOC100911252
	Myl9		LOC685596
	Nudt4		Chrac1
	Pabpc1		LOC689130
	Upf2		Mfap5
	Spag9		Popdc2
	Mrln		Nrep
	Tapt1		Psap
	LOC100910861		Rabgef1
	Eif4b		C1galt1
	Myh4		Cul3
	Plin2		Cnn3
	Tubb5		Kat2b
	Rnf146		Col6a2
	Lrrfip1		Trak1
	LOC100911217		Gpi
	Ifitm3		Dnajc21
	Pfkfb1		Atp5g3
	Dnajc21		Sorbs1
	Rabgef1		Hectd1
	Nek7		Txn1
	Fbn1		LOC100909799
	LOC102552818		Slc38a2
	Igfbp7		RGD1565798
	Sos2		Rhobtb1
	Sparcl1		Ttn
	Cdh22		Cd55
	Dnajb9		LOC100361920
	Kdm7a		Hmgn2
	Arpp21		Ppp2ca
	Skil		Nol3
	Cstb		Kcnj11
	Dnajb2		Lmo4
	Ywhaq		Phkg1
	Rab10		Cpe
	Col1a2		Igfbp7
	Ramp2		Six4
	Ak1		Pfkfb1
	Col6a2		Dnajb9
	Fbxl4		Ccdc80
	Cd55		LOC100910393
	Elk3		Mgp
	Cox6a2		Rfx7
	Arpc1b		Aldh1l1
	Ttc1		Ldha
	LOC689130		ND3
	LOC100365711		Rps4x
	Fabp5		LOC100911353
			Eif4e2

## Sheet: 13270_DNBs
state	4 weeks		16 weeks
	Capns1		Sumo2
	LOC100909441 /// LOC100910937 /// Tuba1a /// Tuba1b /// Tuba1c		Cdc37
	Dynll1 /// LOC100361920		Ftl1 /// LOC100359668 /// LOC100360087 /// LOC100362384 /// LOC100363177 /// LOC100364138
	Mgp		Bcap31
	Anxa3		Capns1
	Anxa1		Col1a2
	C1qb		Cd74
	Aif1		Dynll1 /// LOC100361920
	Cd74		LOC100360065 /// LOC100363269 /// Nop10
	Glul		LOC100909441 /// LOC100910937 /// Tuba1a /// Tuba1b /// Tuba1c
	Cyp2d4		Glul
	Rbp1		Aif1
	Cdh17		Sparc
	Clec4f		Ap3d1
	Col1a2		Anxa1
	Vim		Rplp0
	Col3a1		Rbp1
	Cdk1		Fabp7
	Sumo2		Col3a1
	Ifitm2		Gapdh /// LOC307738 /// LOC685186 /// RGD1564688 /// RGD1564958 /// RGD1565238 /// RGD1565368
	Eci1		Slpi
	Ifitm1		Epn1
	LOC100909548 /// M6pr		Mgp
	Laptm5		Coro1a
	Fth1 /// LOC679217 /// LOC689130		Alb
	Coro1a		Clec4f
	Alb		Arf1
	Psmb9		Hpn
	LOC100910229		B2m
	Tubb5		Fth1 /// LOC679217 /// LOC689130
	Slpi		Ckm
	Ddhd2		Bdh1
	Sparc		Iscu
	Fcer1g		Vim
	Sri		Cat
	Vamp7		Furin
	Prdx2		Arhgef1
	Pam		Oxr1
	Ctsz		LOC686774
	Cyp8b1		Ahsg
	Sh3bgrl3		RGD1560212
	Ran		Ucp2
	Marveld1		Rnf111
	Copz2		Gnai1 /// Gnai3
	Pcna		Sec31a
	Cdc37		Adrm1
	Ninj1		Eif4g2
	Inmt		Puf60
	Pmp22		Plbd2
	Rplp0		Cyp3a9
	Slc22a8		RGD1561736 /// RGD1563861 /// Rpl10
	Tspan31		Tnni2
	Col5a2		LOC100909548 /// M6pr
	Ugt2b1		Ptbp1
	Fbn1		Fbn1
	Bcap31		Dpyd
	Sts		LOC100911122 /// LOC100911158 /// LOC102550530 /// Marcksl1
	Akr7a2		Hras /// LOC367858
	Lum		Anxa3
	Lyz2		Eif4h
	Cyp3a9		Vamp7
	Plscr1		RGD1564614
	LOC100910270 /// Plac8		Pam
	Lrat		Sys1
	Dpysl2		Tcn2
	Bbs2		Plg
	LOC100359951 /// LOC100362149 /// LOC100362684 /// RGD1562259 /// Rps20		LOC498453 /// Tcea1
	Ptprf		Apoc1 /// LOC100911905
	Hyal3		RGD1565784
	RGD1565784		Shfm1
	Mest		Tm9sf4
	Dbnl		Cdh17
	Dak		Acta1
	LOC100911122 /// LOC100911158 /// LOC102550530 /// Marcksl1		Col5a2
	Aldh1a7		Cst3
	Eif1ax		Lrat
	Fdx1		Cdk1
	Nfib		RGD1565798 /// Tpt1
	Sord		Ldha
	Obp3		Vtn
	Cyp2a2		Lsr
	Lox		Fkbp1a
	Rbm3		LOC367746
	Kpna2 /// LOC100359600		C1qc
	Rogdi		Gnb2l1 /// LOC100911540
	Manba		Sord
	Lgmn		Eci1
	Uhrf2		Tpm1
	Cyba		Hsd17b12
	Arhgdib		Sec24c
	Gsta4		Cdc42
	Eif4h		Cyp4a8
	Lgals2		Aurkb
	Col6a1		Tomm22
	Col4a1		C3
	Tfpi		Apoa2
	C1qa		LOC100910229
	Fmo3		Psmb8
	Sptssa		Ninj1
	Enpp2		Ifitm1
	Cd38		Cd38
	Gatm		Syngr2
	Lss		Ubl7
	Ust5r		Atp2a1
	Rtn4		Nox4
	Pld4		Sepw1
	Dpp7		Rabgap1
	Serpina1		Irf2bp1
	Alas2		Reep3
	LOC686774		Tm2d1
	Il18		Apoa1bp
	UST4r /// Ust5r		Slc4a2
	Bsg		LOC100910973
	Agpat6		Nnmt
	Fam111a		Ctsz
	Plekhb1		Inmt
	Aurkb		Ncstn
	Maob		Sri
	Amfr		Arhgdia
	Tagln2		Spink3
	Mkln1		Psmb9
	Iscu		Tgfb1
	Napsa		Pttg1
	B2m		Ddc
	Tubb6		Eef2
	Mettl7a		Lyz2
	Acat2		Rtn4
	Nox4		C1qb
	LOC100910855 /// Ogn		C1qa
	Cd53		Sts
	Hopx		Ugt2b1
	LOC100360065 /// LOC100363269 /// Nop10		Tagln2
	Acsm2a		Cd99l2
	Psat1		Dync1li2
	Tinagl1		Pgam2
	Dap		LOC100912479 /// Vcam1
	A1bg		Tmem150a
	Oplah		Serpina1
	LOC100910973		Slc26a1
	Pttg1		Gc
	Fabp7		Cel
	Serpina3n		Fabp3
	Agtr1a		Sptssa
	Gja4		Mest
	Ube2s		Fcer1g
	Ms4a6a		Aadac
	Lyn		Mgst1
	Ahr		Cyp2e1
	Dync1li2		Lox
	Ahsg		Ugt2b15
	Hist1h4a /// Hist1h4b /// Hist1h4m /// Hist2h4 /// Hist2h4a /// LOC100360950 /// LOC100912290 /// LOC100912418 /// LOC100912489 /// LOC100912564 /// LOC680097 /// RGD1562378		Lgals2
	Vdac2		Ptprf
	LOC100910017 /// Rpl31 /// Rpl31l1 /// Rpl31l2 /// Rpl31l4		Acadm
	Dpyd		Vdac2
	Nrep		Sod3
	Stradb		Ttr
	Mdfic		Myh1 /// Myh2 /// Myh8
	Mki67		Akr7a2
	Ephx1		Maob
	Gmfg		Hibch
	Ccnb1		Hp
	Por		Igfbp3
	Ect2		Dstn /// Dstnl1
	Furin		Prdx2
	Abcg5		Irf7
	Lcp2		Csrp1
	Plbd1		H19
	RGD1560212		Mcfd2
	Fdft1		Enpp2
	Pla1a		Slc4a1
	Il17ra		Evl
	Aldh1b1		Oplah
	Hmmr		Tspan31
	Prtg		Cd53
	Spink3		Sepp1
	Scpep1		Fabp1
	Acox1 /// LOC100910385		Ube2n
	Ipmk		Hnrnph1
	Il18bp		Ltbr
	Hnrnph1		Hyal3
	Ddc		LOC100910270 /// Plac8
	C3		Afm
	Cel		Cox6a2
	Ap3d1		Alas2
	Adh7		Prlr
	Plvap		Glod5
	Lphn1		Ak3
	Ldha		Mfge8
	Afp		Sh3bgrl3
	Cdca3		Dpysl2
	Ifi30		Gamt
	Sh2b3		Scamp4
	Marcks		LOC100359517 /// LOC100909755 /// LOC100911728 /// LOC100912121 /// Rps27
	Cd68		Laptm5
	Crip1		Hnrnpk /// LOC100363335
	Emcn		Pcbd1
	Acp5		Ube2s
	Irf7		Col4a1
	Mx1		Tfpi
	Gys2		Fbln5
