# Supplementary material for: Detecting the Critical States of Type 2 Diabetes Mellitus Based on Degree Matrix Network Entropy by Cross-Tissue Analysis
Source: Entropy (Basel). 2022 Sep 5;24(9):1249. doi: 10.3390/e24091249 (PMC9498060; doi:10.3390/e24091249)
Supplement: Supplementary file 1 [file entropy-24-01249-s001.zip › Supplementary Table S2.xlsx]

## Sheet: Name
			The degree matrix and local network for GSE13268 (rat adipose tissue)

## Sheet: degree matrix _4 weeks
Symbol	GSM334860	GSM334861	GSM334862	GSM334863	GSM334864	GSM334880	GSM334881	GSM334882	GSM334883	GSM334884	GSM334900	GSM334901	GSM334902	GSM334903	GSM334904	GSM334920	GSM334921	GSM334922	GSM334923	GSM334924	GSM334940	GSM334941	GSM334942	GSM334943	GSM334944	GSM334850	GSM334851	GSM334852	GSM334853	GSM334854
Cdc37	5.68612	8.0422	9.22025	8.30984	7.37982	6.17522	5.49703	8.98391	10.8987	6.94137	7.71854	6.45163	12.2608	18.3615	9.96558	15.459	6.50327	6.21319	5.2537	9.71214	9.6635	7.29195	9.96119	10.5376	4.89198	10.2375	6.08045	9.66514	4.09394	7.12236
Copb2	8.05965	5.81062	10.5334	6.26386	7.32139	9.00124	9.05282	4.30331	10.5043	7.69706	7.36034	7.57365	25.4529	8.57889	14.2112	5.25738	19.9771	4.28357	4.32091	12.6629	4.22838	12.9972	14.4408	11.8892	9.03795	11.283	6.83803	10.4261	6.10019	10.5721
Ube2d2 /// Ube2d3	3.79321	4.64849	5.38517	5.22963	4.1115	26.7468	6.56453	5.22972	7.75728	5.1197	5.6233	7.55287	4.1402	7.70973	8.29672	6.78597	5.20359	26.4965	9.01956	7.33784	4.61796	5.05981	3.01783	4.28792	5.89953	5.36766	5.94675	4.29413	4.12411	4.77938
Arf1	6.65475	4.36665	9.29655	7.32957	8.98268	6.16587	14.6638	4.2809	5.78979	7.19661	5.39758	9.72419	7.77371	3.34209	9.87479	5.6282	7.53522	11.9574	9.71723	5.92108	8.38549	9.19094	6.88049	6.17766	6.79132	8.83899	20.1576	13.6834	10.1278	5.30404
Gdi2	7.96352	11.6676	10.417	7.38353	12.5933	6.10048	6.6785	5.92826	7.92163	6.48595	6.52617	8.05155	22.5725	4.93495	11.7858	7.52349	6.2112	7.43707	6.85718	5.85757	7.08847	8.92442	5.76452	8.36399	6.25968	25.3629	7.78376	13.5098	13.3106	14.18
Copb1	7.27217	4.81837	9.18411	5.61634	10.7567	7.31964	5.04116	7.54574	7.26893	8.9382	6.82058	5.27766	22.431	4.84404	8.70745	5.44279	21.7928	3.15796	4.62156	8.81323	7.04096	9.10349	7.65067	10.4105	5.79663	10.6448	11.6261	6.59472	6.45015	6.00837
Capns1	4.47717	8.66381	8.03559	19.2233	12.8521	5.46988	4.75245	5.2484	5.43761	5.6652	5.47118	6.55032	7.75089	11.1136	10.5406	3.76175	8.02686	4.72131	4.99545	9.13078	26.653	10.2945	6.34215	8.38094	7.19863	3.62521	5.66947	5.07731	9.71444	3.28807
Phb2	9.642	3.8879	10.3286	8.92589	9.10373	9.12269	19.3935	7.15725	6.04805	7.15156	7.26711	12.4981	10.2797	5.62228	8.31834	6.55936	6.89268	9.23715	23.235	10.0492	10.1006	8.9619	8.43656	6.64798	8.5749	8.07865	8.53639	7.07086	6.16354	2.94309
Puf60	9.76031	6.37045	4.79084	6.31782	5.14668	6.63299	4.912	4.70301	6.93553	17.1858	7.44376	6.39449	10.8914	9.3535	2.98751	5.10493	8.70834	6.12832	5.24985	7.90455	6.58011	7.86248	7.96109	5.79209	8.55347	11.6767	6.21909	9.79863	19.0789	7.75482
Iscu	8.35172	8.27	4.4776	7.20816	11.3077	7.99695	12.5744	9.22298	8.24563	8.718	19.5343	10.9969	9.55395	6.70601	8.69448	7.11147	5.4129	10.4968	9.00029	6.23863	5.48739	10.078	7.56422	7.19032	8.18475	8.66701	11.1854	12.6377	4.6038	10.3745
Sar1a	3.47896	7.21984	11.5052	6.62809	11.2367	5.88561	5.9529	17.6055	5.85083	4.80441	5.36323	9.89042	24.5673	12.0628	10.2596	8.1786	9.73543	4.03344	4.42884	10.9237	4.93152	13.7593	7.82356	10.7198	6.98855	9.49071	6.02598	8.35242	11.1414	8.24713
Sec24c	10.3186	9.31243	5.67833	6.99682	5.89802	5.79218	8.32723	5.04668	5.10422	8.3877	9.08266	6.81525	2.50603	4.50583	6.2647	8.16212	7.36972	12.8105	22.7301	7.92409	8.40924	5.54705	7.63888	9.72409	6.25539	6.74352	18.7068	6.33663	6.21483	3.13714
Srp14	8.00789	7.89935	6.05983	18.3554	4.34525	3.72288	7.34711	8.52444	5.65831	8.44775	6.75188	4.47251	19.0212	8.68799	9.68456	5.92073	7.63744	4.64984	4.2708	4.70462	10.2099	10.4569	11.2776	10.9783	12.1292	8.92498	6.04083	9.08665	5.91012	6.29944
Htra2	3.87824	9.15414	11.188	8.39978	8.26891	9.27217	21.0916	8.80461	10.8236	14.8837	6.99232	8.43075	5.77893	3.60393	5.63347	6.32451	7.54983	6.66433	6.72998	10.3521	6.95544	6.98795	9.39535	7.46149	9.08082	5.69805	6.0854	4.04049	8.18487	21.9097
Eif4a3	3.11295	14.9261	12.1397	6.745	15.3983	18.0585	5.56162	10.4669	10.2601	7.21162	3.42992	5.18416	7.10726	5.47318	9.28247	9.12625	8.58665	5.97646	16.6476	7.22548	11.3501	9.82394	5.96493	4.28792	8.51917	4.51228	5.32287	7.4135	11.3436	9.67735
Tmem261	4.98367	5.91872	3.65437	7.98159	8.32735	6.51154	4.28138	10.8778	11.3354	5.30987	5.74597	9.1476	10.193	5.74956	8.64692	6.77773	8.88845	7.66487	15.5877	4.10861	3.53948	9.03686	9.51716	5.37685	3.70007	12.1926	9.74456	11.5563	6.80614	13.889
LOC498453 /// Tcea1	13.4241	11.127	15.5612	6.43024	13.5951	10.0896	9.53148	6.07395	7.98267	6.02553	8.83241	6.56591	12.0737	7.22241	11.5134	10.3623	8.84464	6.36953	5.23443	9.50207	7.61108	13.1263	22.0561	10.5376	8.98221	7.05128	9.50193	8.90421	9.31621	22.2331
Ankrd17	5.52345	9.03445	8.90702	7.30709	6.20273	22.426	4.5549	8.93535	7.63519	7.21662	7.08555	9.86964	10.508	9.61897	9.49432	4.88656	5.31068	9.60789	15.2253	6.52687	4.85551	2.51116	7.53278	12.2621	12.4936	12.2651	6.23394	11.7477	12.1491	11.5927
RGD1560212	4.05201	7.59048	7.97134	6.14245	5.10494	5.60534	4.53591	6.89949	4.39986	5.51506	3.64582	9.73978	8.13889	19.8707	8.96686	4.34269	6.27448	12.4621	7.44692	4.18189	5.0883	10.5569	9.28532	11.8892	6.22967	6.38598	8.19969	4.97051	9.43387	3.87022
Pfdn4	14.1229	11.2351	12.971	8.67407	5.98985	13.2146	8.91986	11.1692	12.8568	30.493	7.5468	8.39958	6.37691	9.38986	12.1403	6.86838	7.85162	6.62859	21.3193	7.94852	9.07913	7.47519	8.94346	8.77923	9.94689	7.63059	11.5816	14.293	12.8792	11.4597
Tm9sf2	7.04665	2.9111	3.97161	4.11445	7.9809	5.86692	5.32228	8.85317	8.36772	4.8995	9.48012	6.62305	8.14802	17.7287	4.86389	5.16261	8.88845	5.36898	4.59458	5.67681	5.43988	6.36328	4.38921	6.07173	5.17495	7.10106	12.7501	6.89286	6.35361	21.3635
Ptdss1	11.424	12.3509	10.5856	6.3448	10.8777	6.19857	5.69838	5.41276	6.24996	8.73802	6.60958	8.39439	7.6322	11.6882	6.61922	5.43867	6.6493	5.00271	6.33682	7.60165	5.45888	7.87081	5.94921	6.18613	4.98631	9.6989	4.53062	8.73066	15.8026	11.0609
LOC100910272 /// Srp72	11.509	9.3549	23.404	6.39876	6.59092	8.34729	8.67673	4.54986	6.67258	5.30487	6.80095	7.79702	8.07042	4.50219	15.2921	8.26513	7.78834	6.34719	5.26912	7.07403	4.19987	11.0941	9.75293	6.2285	9.72394	10.5181	6.87269	4.26743	7.3703	8.68195
Bcap31	5.8414	8.24297	9.67805	6.93836	4.29933	8.80038	6.19983	7.62045	8.08598	7.80717	6.1238	8.84112	9.64524	5.6441	6.43764	6.1803	8.19236	6.8028	8.47222	7.56257	7.34977	7.17535	21.0226	7.03779	4.90056	10.6403	12.3094	13.7012	6.75184	19.6134
mrpl11	12.1301	9.99195	10.8908	7.40152	25.1574	6.03041	7.24074	5.09524	6.71014	9.79399	7.81668	9.54238	10.7088	19.0016	12.3954	6.8313	8.12908	8.18301	4.59458	10.7918	9.02687	14.13	11.588	5.09297	12.3736	8.41356	9.60096	7.19545	12.1159	5.05968
Txndc15	7.6086	5.39364	5.96746	7.35655	6.21525	6.4041	4.76384	5.96562	6.08092	5.57512	6.53107	9.23591	7.99738	17.3651	6.22146	4.39214	7.25289	6.977	8.36815	10.5769	5.84371	11.1357	8.59767	8.12248	7.28009	20.484	11.7549	9.60729	5.4063	8.22198
Chmp5	12.9028	11.4089	12.7381	7.54091	7.24625	8.76301	7.7384	5.4165	5.79448	7.75712	9.19552	8.18141	13.3153	11.1682	9.20033	10.111	7.00951	10.8318	11.2976	7.50883	7.79161	13.2804	7.8157	22.1133	11.6876	12.6679	10.3982	10.0745	9.06882	23.0381
Cnot7	8.2445	9.01128	4.56194	6.29534	4.28264	6.81516	3.98506	4.13895	5.95883	7.0765	7.42413	6.15554	9.71372	5.50227	3.77871	20.1643	8.83003	9.21482	11.1781	6.65389	21.8165	5.14726	3.55224	5.51668	3.85442	4.42628	6.00122	8.33017	3.92801	3.58633
Osbpl2	12.8843	10.0074	12.8345	6.54715	6.03576	7.70267	4.93479	5.69666	7.98267	6.59605	6.13362	8.16583	23.0107	9.48805	12.4818	7.82015	7.20909	5.12778	6.71456	5.90154	6.10977	12.8765	5.4148	7.61827	13.484	7.0558	7.53619	7.95193	11.6302	20.8173
Apoa1bp	9.58654	8.87615	6.3851	7.01031	7.29217	5.18494	5.29569	8.81955	8.78094	25.9038	5.71653	7.65157	8.19366	21.3254	8.90201	6.74065	8.77162	4.71684	5.13807	8.59339	7.67759	10.7818	11.8434	3.97438	5.65944	5.21378	5.58529	10.079	6.41998	8.69632
Thrap3	7.18713	14.9261	8.0637	4.03351	13.4865	4.74585	7.68521	6.88829	5.49396	7.4068	8.9011	9.48005	7.06618	8.13522	8.98848	6.55524	20.4201	6.19532	6.45246	8.44194	7.72035	8.44134	8.49157	14.1349	4.42894	5.92434	6.7489	11.494	12.2275	14.4531
Fbxw8	3.88564	12.1309	12.9188	5.97607	14.7763	5.13356	4.59289	5.12513	16.1767	5.90042	7.40941	9.20993	5.46853	10.3754	8.24917	7.23508	9.09289	8.29914	5.81261	8.13416	8.53277	5.27219	5.24976	19.927	7.70884	8.753	5.30801	13.403	8.72188	11.5747
Dazap2	8.28517	11.6212	13.5613	6.11097	14.7763	7.43175	6.20743	4.76278	7.71972	7.34674	6.86474	7.21523	5.54157	4.364	6.62787	6.35747	6.20147	5.20818	4.80658	9.72191	7.45429	7.25864	7.25772	25.2233	10.9373	5.07348	6.28841	10.0523	15.9806	12.1641
Irf2bp1	6.50687	9.79118	6.97542	7.45548	6.64936	5.92765	7.64722	7.55695	5.8837	9.89408	7.31127	6.41007	7.26246	20.889	4.25429	15.7474	5.45184	5.02058	4.98389	9.4923	12.1863	12.9681	10.2284	8.05468	5.18782	9.29158	7.93231	4.32083	3.25524	5.96165
Mettl5	13.9195	10.7255	5.06391	7.04628	12.5599	8.05301	11.826	3.79902	6.36736	8.76304	7.60078	5.45428	8.91489	3.84032	6.07879	20.4898	4.74115	7.26733	12.0338	8.04622	3.29718	5.34299	9.47001	12.7748	11.7691	13.1567	8.16008	8.81966	10.8699	20.4974
Rnf111	11.5867	11.185	7.60992	5.87715	9.32079	8.99657	7.89415	4.33693	5.61135	7.03145	7.1935	9.83847	8.44472	21.3254	8.90201	3.39917	6.0603	12.4621	10.5614	6.86885	6.83192	11.5355	12.4957	13.1773	9.94689	6.7571	9.27416	11.3739	12.846	4.92672
Mrpl43	9.04677	8.92635	9.66199	8.39528	9.11208	6.76378	7.55985	4.94209	7.56476	8.3877	9.60279	9.07487	8.78708	6.29143	10.2336	4.94836	8.45035	8.59395	4.46738	22.5998	6.56111	6.1384	8.06326	6.66916	8.87074	6.20042	7.76891	7.32895	19.6853	12.9511
Zmym2	9.10592	19.37	4.58603	8.72803	9.58375	6.17989	4.9158	4.47515	6.83693	5.9955	7.28673	7.55287	7.12552	8.5498	8.35725	6.74889	7.95385	5.75312	5.69312	9.25291	10.1624	22.5505	8.29117	9.65206	7.34441	5.44913	6.90239	6.37223	6.7096	6.0479
Ap3d1	14.2929	15.6674	9.27647	5.33305	14.0459	6.83384	5.91491	7.77361	6.6491	6.45593	6.31517	11.3033	12.6214	22.0673	9.76238	7.39576	7.69099	7.91501	5.56206	8.0218	6.07651	8.34556	9.70578	10.7368	10.7229	7.07843	10.007	12.4107	19.0789	9.55517
Ccz1	13.9195	10.7525	3.54594	6.45722	9.64637	6.84786	5.56162	7.52333	6.87449	5.29486	8.77843	10.0514	4.15389	4.70584	8.82419	20.6381	5.33015	9.99649	7.83237	11.4074	5.15482	8.26643	5.40301	8.08858	7.32726	8.56291	9.37319	10.8221	9.73556	21.3635
Hbb	8.30735	10.795	4.47359	8.51219	3.6106	5.90896	4.00026	8.99885	10.5982	6.63109	7.37506	10.1501	7.88326	7.82246	21.6303	15.7145	6.12358	7.3656	4.72564	10.1616	7.22625	8.0707	6.22034	5.21584	4.43751	15.2521	5.03568	12.3351	11.9289	15.1539
Alb	15.8235	3.66011	4.80288	6.99232	3.60226	5.83422	7.54465	3.22001	6.07622	8.24257	19.8925	6.04645	7.77371	5.00405	4.54828	8.33517	4.70708	9.63916	11.101	8.16836	5.93398	7.56264	6.20855	5.67768	6.91566	7.78899	5.98637	4.96606	8.387	9.53361
Gapdh /// LOC307738 /// LOC685186 /// RGD1564688 /// RGD1564958 /// RGD1565238 /// RGD1565368	13.938	15.0149	23.3237	7.07776	6.35717	6.49752	10.0975	9.59654	11.6312	10.8049	6.42803	9.1476	8.47211	17.4305	12.5294	6.47284	8.22157	8.30361	7.38525	10.6501	5.10256	9.98219	7.63888	12.4358	14.2	13.1702	7.69464	13.6077	9.76874	15.1144
Ftl1 /// LOC100359668 /// LOC100360087 /// LOC100362384 /// LOC100363177 /// LOC100364138	13.9195	9.67922	3.63027	8.93038	11.5205	11.7105	9.55048	8.68881	8.69172	7.88223	8.92564	7.60482	7.32637	5.60774	7.28503	15.974	7.61797	8.70561	7.24263	4.28448	9.00311	3.6897	2.73098	4.85993	6.61125	14.4692	5.922	14.3776	8.50768	23.6633
Rplp0	8.59203	9.76029	19.7818	5.97158	3.6106	5.32974	5.84274	5.6593	6.70545	5.62016	6.91872	7.40223	5.8474	6.94239	9.85749	5.83833	6.13332	4.92231	5.90512	21.4029	7.17874	5.05564	7.69389	10.3893	9.84399	6.77973	8.63542	6.12303	7.5664	13.084
Rpl27	8.22232	10.517	11.3446	5.57137	6.04828	9.3469	7.51046	5.24466	6.31101	6.40088	6.60958	7.63079	11.252	18.9979	7.83411	4.66819	7.34538	5.87819	7.17711	4.95378	6.62762	8.60792	7.22235	7.85131	10.157	6.38145	9.71485	23.0682	8.84557	11.7364
Sparc	12.7476	10.629	3.18854	8.33682	3.7567	26.7468	9.93417	6.26819	5.39535	6.00551	8.58215	5.56856	6.64166	10.059	11.2972	15.7145	8.74242	7.77207	8.04823	6.36077	8.65629	11.3398	11.1911	5.29211	10.3242	9.4002	6.36763	6.45677	4.69129	10.22
Igf2	14.548	14.5015	13.742	8.08951	10.1932	5.3858	8.38041	9.21178	8.90772	8.5028	7.15425	7.26198	7.31724	7.81883	8.72475	5.75592	8.78136	10.9256	9.89454	8.93536	7.98165	20.2434	4.21239	5.93615	5.295	13.3784	8.33833	13.2784	18.6867	8.90834
Myl3	14.378	9.55953	13.5894	6.18292	11.9588	9.52908	11.1916	9.05862	8.78094	9.52374	10.8344	9.70861	6.97489	6.50235	7.40177	9.31166	8.93712	6.95913	8.13688	7.84592	10.1671	5.60535	22.5787	11.0503	12.2321	14.9172	8.49678	10.6931	19.6853	14.2232
Vim	6.74718	9.09622	4.79485	6.09748	20.6577	9.42164	8.29684	4.43406	6.47066	6.6411	6.36424	10.9657	8.12519	11.8373	13.8783	20.3991	6.77099	10.3494	12.9859	6.351	6.56586	9.37418	11.8316	4.5252	10.6114	5.79762	5.89229	4.13394	4.46804	5.41184
Eno1	9.63091	3.05395	9.34474	18.6971	9.75907	12.0188	11.9362	6.94806	6.31101	11.971	6.74207	7.2412	5.95695	10.459	12.2354	5.37274	5.52486	11.4928	9.93308	10.4938	17.3743	11.3523	11.6273	10.5842	12.6866	10.5814	10.8933	11.5919	5.79246	6.98221
Hspb1	3.4198	5.96119	4.40934	4.77097	4.08645	8.86111	9.01103	8.82702	20.1257	7.85221	6.46238	5.40752	6.2491	6.28415	5.8237	7.95199	19.9771	7.40134	10.7772	4.30891	6.65613	5.36381	6.11425	7.46997	4.74621	5.37219	9.0563	4.77917	7.31298	5.8251
LOC100363537 /// RGD1560124 /// RGD1566137 /// Rpl10a	14.023	10.2468	6.4092	6.16493	4.15741	6.83384	4.88921	5.99176	5.96822	6.89633	9.6813	11.5371	6.59601	6.89511	20.9299	4.68055	5.90454	8.62521	4.66011	8.01203	4.05734	11.2024	9.6429	7.13948	12.3993	8.34567	11.9183	13.2784	9.03564	7.53561
Spp1	11.1689	10.8645	7.81874	6.92037	13.1818	11.7198	25.164	5.00559	5.49865	10.2144	7.97861	9.55277	6.81969	8.0843	8.69016	7.24744	4.68761	5.04291	6.96511	7.64562	6.54211	8.64956	8.44442	6.67763	5.99386	8.59459	10.4774	14.293	10.5863	19.962
RGD1565798 /// Tpt1	5.50126	8.68311	15.2078	8.51219	3.45199	8.38465	11.4689	4.23234	6.52231	8.25257	8.58215	6.15554	7.91065	8.07703	12.3262	3.86475	9.26813	5.26625	5.49268	23.6062	7.80112	10.3903	3.81551	8.15637	10.59	7.62154	7.32822	8.47257	11.594	13.4865
Atp1a1	5.75636	9.99967	7.50551	7.07326	13.1902	7.05806	6.62151	8.78593	8.40998	12.9869	5.9079	9.7138	10.2524	16.1977	3.78303	16.9629	7.34538	7.53534	7.03064	11.1924	4.73198	5.43461	9.32069	8.56737	9.76682	10.8847	10.2744	8.19223	5.47267	5.42262
Ldha	13.8936	15.0149	13.742	7.22165	8.81989	7.98294	6.24542	9.59654	9.72947	8.67797	8.07184	8.33725	6.76034	19.0016	6.61922	7.00847	8.43088	8.55821	7.80539	12.0669	6.68939	8.84529	11.3011	13.6137	13.5483	13.1702	8.46212	14.916	19.6853	9.84265
Rpl13a	4.62875	4.93806	4.75871	5.71527	4.19915	5.07283	4.59289	17.6055	7.41919	5.82535	8.55762	6.97628	7.06618	7.53517	5.99232	5.00193	8.22157	4.87318	3.93546	6.03833	8.47576	9.69067	6.10246	19.4948	10.4399	6.04201	10.7992	4.07609	3.16775	5.50168
Aco2	8.1225	19.37	9.73026	5.22513	4.92545	6.16587	8.15628	8.28911	10.6874	7.9523	7.45848	7.6204	8.55428	10.9645	9.18303	4.34269	6.68824	9.97416	10.4843	24.1387	8.4425	4.85158	4.80966	11.3977	9.92974	11.7672	6.93706	9.0021	8.40209	8.96943
Ran	7.45332	4.27785	9.54151	18.6971	6.02741	5.85758	8.80969	9.21178	8.87485	9.33357	5.95206	9.65147	4.18584	4.78949	9.20897	5.1791	5.65628	11.4214	22.3947	9.88313	10.1053	11.1316	11.8473	8.01231	11.4003	8.14201	7.87784	3.79575	4.72448	4.38769
Prdx3	8.71773	8.64836	5.99959	8.34132	10.9236	12.0468	25.164	6.66416	5.81796	10.2144	8.20432	6.25424	9.7548	9.72807	5.53836	6.41928	8.12908	10.5682	22.6299	10.6892	8.32848	10.94	7.63102	11.9655	12.1549	10.2692	9.02164	11.0757	10.5803	5.46215
Tnnt2	8.7473	9.72941	11.6137	6.40326	11.9129	6.84786	5.18552	5.74896	6.6444	6.44091	8.47911	8.8567	6.74209	3.69121	9.47703	4.13256	6.69311	5.50298	5.63916	22.6828	7.76786	6.56317	8.46799	6.07173	8.96077	14.6773	8.63047	11.5519	16.3607	9.62704
Sepw1	12.5479	12.459	10.694	9.20018	15.4776	6.95529	8.7717	8.75231	8.31607	14.0779	10.0395	8.98137	13.1464	21.3254	8.73772	8.25689	10.266	8.51355	5.06483	6.00413	8.62304	9.69067	11.8316	9.23259	14.7531	11.0974	8.7295	14.4399	18.0562	8.78616
Rps8	7.72691	7.30478	5.94738	6.27285	3.36433	7.66063	3.98886	2.37205	5.447	25.2131	8.72936	5.99451	11.3022	5.63683	10.4066	13.1146	6.17713	4.58731	5.32694	4.55318	5.5349	11.9895	7.27737	4.48283	4.26601	10.8258	9.87825	6.14528	8.87574	8.79335
Ttr	15.8235	5.87239	4.54587	7.72528	5.8354	5.61935	4.72205	5.36793	7.0811	8.53784	17.1054	5.28285	5.49592	4.79312	6.03123	8.24865	4.70708	11.8904	9.01186	8.16836	5.04555	5.08479	5.96493	5.05483	4.12024	6.84761	5.98637	4.91267	3.58107	4.26551
Atp5g1 /// LOC689961	13.9306	13.7563	11.5494	5.63433	9.2373	10.4913	11.8792	4.99812	6.38614	11.1302	8.07184	7.1477	7.06162	16.6486	10.078	7.77894	8.59152	10.5682	9.90225	6.57572	7.35927	7.02959	6.4286	6.70306	10.65	14.9172	8.49678	15.1296	19.0789	10.5829
Des	12.5479	13.0073	14.0472	7.23964	9.66724	6.50687	6.15425	9.0138	10.2695	6.93136	9.00415	8.99696	6.41343	8.5898	6.27767	8.10444	10.266	8.35721	6.13639	9.292	8.89384	4.55591	22.5787	10.7664	8.99507	14.9172	8.34823	12.2995	18.0562	9.03052
Tpi1	13.938	14.1269	11.5494	9.42052	9.2373	7.98294	8.92746	9.02874	10.1474	11.2854	8.07184	10.5917	8.14802	20.4526	9.52459	6.04434	8.28485	9.66149	6.80707	8.08042	7.35927	12.1435	12.7629	9.46139	13.5398	14.9172	8.47697	15.1296	19.6853	10.5829
Rps3a	9.30926	8.71786	5.27273	7.01031	14.0709	6.56292	4.78664	3.06686	4.67691	6.49096	6.75188	3.9063	6.73296	7.90974	8.60801	6.38219	7.74453	4.41311	5.26912	5.83803	18.7141	9.24924	8.44049	7.31743	8.00467	7.54912	9.17018	5.69584	8.11548	4.44159
Cox4i1	8.71773	15.042	7.7063	4.30781	3.68156	5.32974	4.12183	10.3212	5.72405	4.88448	9.39179	11.4332	5.74241	5.77138	6.38575	15.1047	6.19173	7.87034	5.34236	16.3465	9.22641	4.08949	6.89228	4.12691	7.21149	4.47154	7.34308	10.4661	9.92864	4.57815
Mif	9.11701	2.63698	9.87884	18.6971	8.19378	5.47455	6.27201	5.64063	4.40925	4.6793	6.68319	6.89316	10.2204	21.3254	8.73772	5.53343	6.82454	6.70453	7.98655	8.7888	9.94381	9.67402	11.8434	4.08031	6.97568	4.52133	7.17473	4.36533	3.41514	3.75882
Rpl19	4.75445	7.60207	4.46154	6.65957	4.17828	8.70696	8.19427	4.91594	5.663	6.74619	7.31618	7.56846	8.8099	19.9071	10.4152	12.4719	7.16528	4.50244	7.24649	4.52875	6.0385	11.1066	5.85097	6.15224	9.65534	6.78878	7.2589	8.88196	6.46221	7.22298
Prdx1 /// Prdx1l1	3.6786	3.76822	12.1558	9.94213	8.04768	25.2427	9.63406	4.9645	5.73813	13.0069	9.22496	5.60492	9.59047	21.3727	9.76238	6.26271	8.02199	8.28128	4.92607	7.76776	10.2099	12.7432	4.38921	6.33443	5.96385	8.59912	4.77325	10.4261	6.1213	5.62386
Anxa1	23.1438	9.99195	8.08378	8.9034	14.1001	5.58198	8.62734	6.3429	6.00579	9.95414	10.2211	10.2592	18.8158	11.6373	13.8783	6.91782	7.2675	11.0372	9.33564	6.07741	8.48526	13.1014	9.81973	5.40651	9.35093	8.51765	9.02164	10.9957	11.953	11.1866
Aldoa	9.50521	14.1269	22.2394	6.92937	5.28025	9.28618	7.41929	10.0448	9.78582	8.36768	7.36525	6.90355	6.90642	8.46615	14.2545	7.00847	9.03448	7.88821	10.28	10.357	5.72494	12.2476	22.5787	10.2156	13.5398	6.10538	7.39754	11.138	11.6302	10.2559
Gnb2l1 /// LOC100911540	9.77509	6.54419	5.62612	7.04628	4.93797	8.65558	7.28253	11.2065	5.91657	5.9955	9.20533	7.15289	9.80501	21.3254	8.90201	4.8536	7.61311	5.65932	6.0169	7.50395	5.09781	14.13	13.2502	9.09701	14.7531	8.39093	9.7297	6.55912	5.65067	8.57414
Pgrmc1	14.2338	13.7563	13.0834	6.69104	9.22478	9.25815	25.164	9.29396	9.46651	13.5074	7.49282	11.1111	7.30811	11.8373	10.3504	8.28985	7.89543	11.4437	9.37418	11.6126	6.82241	11.4189	8.20865	7.78351	10.5729	7.60796	6.97667	14.4399	18.373	15.0856
Atp5g3	14.0748	9.20047	7.58582	7.79722	8.64041	8.87045	7.85996	4.71795	5.447	6.62108	6.20722	9.79692	6.82425	5.02587	10.8735	5.63232	4.96994	6.91	5.41174	24.0361	9.08863	7.47519	5.24976	4.55062	5.97242	9.60839	6.17452	9.45599	15.9806	9.85703
Atp5h	12.8659	8.92635	13.742	7.57689	6.64101	6.43213	4.99938	8.93161	8.88425	6.31079	5.92262	7.31392	6.16693	9.22985	12.391	6.94666	6.65903	6.37399	22.5104	7.64074	5.95773	7.66675	6.64472	6.62255	10.7787	12.3375	6.94201	12.077	19.6853	14.2232
Atf4	6.91355	11.1077	4.70249	9.78025	6.05663	11.3602	12.2173	5.02427	23.3658	9.96915	9.68621	9.56836	4.34561	3.54938	4.75148	10.968	20.7073	8.98255	8.08677	7.14243	5.49214	7.3336	8.14185	5.5082	12.2192	5.54417	4.80791	7.65824	6.07002	6.01555
Ckm	14.0748	14.1269	22.2394	8.08951	4.95467	7.9409	5.98709	9.05862	9.96426	6.22571	9.42123	7.50612	6.55037	11.9755	9.81858	8.84608	9.32654	6.9636	8.13688	8.45171	5.85321	6.12591	22.5787	10.7664	8.99507	11.4233	8.34823	13.7012	8.48958	13.3859
Gatm	9.8971	5.60599	9.0797	6.86192	3.4186	9.30954	10.9295	11.5054	8.45224	21.0443	23.1802	5.76075	5.44114	4.27308	4.54396	6.41104	5.51025	10.6352	5.62374	9.93198	9.05538	8.21229	4.76644	6.74967	4.68618	4.79288	7.51143	5.14851	6.42299	5.94009
Cox7a2 /// Cox7a2l2	14.2338	12.71	11.8626	7.60387	7.36313	3.71821	8.20946	4.31452	6.71953	8.5028	7.35052	7.12692	5.66025	10.4227	12.858	5.87129	6.74178	10.6308	6.94198	21.7009	6.57061	11.9811	4.42065	6.39799	8.70781	7.71205	6.4419	11.4495	13.8597	10.3925
Ctgf	3.10925	3.07326	7.60189	6.23688	9.18304	13.8872	11.3132	4.1763	6.00109	12.4514	7.13462	6.9555	4.22693	5.32771	13.7702	5.34802	4.11809	5.15905	5.59676	6.19466	6.43283	5.85522	5.47767	6.38104	9.32092	27.6168	5.54073	8.94426	6.6915	5.39388
Glul	21.5614	4.135	6.83487	6.01205	11.5122	13.0371	10.8877	8.00894	11.3401	13.4774	5.34851	8.51386	10.3254	6.9533	7.69576	4.29325	20.9798	8.49568	9.34334	5.24201	6.96494	6.98378	7.11233	9.16904	8.46343	7.39977	10.8091	8.80631	3.30955	9.10598
LOC100910017 /// Rpl31 /// Rpl31l1 /// Rpl31l2 /// Rpl31l4	9.29078	11.351	11.5856	5.99406	4.10732	5.72679	4.50932	10.0149	5.51274	3.68338	7.39959	7.90091	10.193	10.8918	11.9846	5.70648	7.78834	5.27518	4.67553	22.7952	5.84371	5.20973	9.16744	8.67754	7.09573	7.92477	10.3585	12.4285	7.47891	12.2288
Igf2r	13.4796	12.8606	14.9227	5.60735	14.217	6.59095	4.79044	5.5323	5.93066	8.77305	7.39959	6.56071	10.4441	10.3899	4.65637	5.48399	5.95321	8.13834	7.33514	8.73506	22.724	10.711	7.76855	7.52929	9.68964	10.9254	6.67958	11.5296	14.2247	12.2467
Ppp1cc	13.938	10.7525	6.4855	6.15144	4.45377	6.92727	11.317	7.91929	6.91675	4.84445	5.38777	7.68793	11.6537	6.04413	8.02002	7.25568	7.51088	11.274	7.53943	21.7009	7.67284	8.62041	8.6684	8.74957	7.18577	10.7263	11.3389	8.38357	4.5495	5.35435
LOC100363271 /// LOC679871 /// RGD1562399 /// Rps2	11.5127	15.0149	11.8948	7.01031	4.02384	9.29552	9.67584	10.691	9.45712	6.22071	6.99232	10.2125	7.70981	19.8925	6.14796	8.45054	6.26962	7.46387	7.70903	8.79369	8.18595	8.62041	3.36755	5.13534	7.89749	5.38576	6.11015	5.84269	19.6853	10.5829
Sod1	7.79346	8.59045	5.31289	6.42574	7.1586	11.2854	12.8859	10.381	8.43346	13.7426	8.05712	8.06194	9.49461	20.889	9.29544	17.9105	6.90729	11.006	7.4238	7.84592	10.5947	10.4861	5.4148	4.37266	4.21457	4.05969	9.55145	6.26988	6.57686	3.95287
Bsg	6.92464	8.94179	8.45725	16.1116	5.55156	6.83384	6.12006	5.47626	5.89309	8.85813	7.58115	5.28805	9.15226	21.3254	8.90201	7.27216	7.85649	6.08812	6.00148	8.10485	11.1221	12.9556	11.8866	11.2537	11.2031	9.70343	7.92736	8.00088	6.45316	10.2487
Adcy6	7.42005	5.83764	7.50551	5.6658	6.5617	10.1223	7.708	8.02388	6.91675	5.49504	8.78334	9.96834	8.4219	7.90247	12.1662	7.04967	8.73755	8.08921	22.1442	12.0229	7.39728	10.9109	10.5781	10.5927	11.6576	11.0386	12.3788	10.9957	7.7263	19.847
LOC100361180 /// LOC100362366 /// LOC100365810 /// Rps17	9.22423	10.3665	7.58984	7.65333	4.12819	9.3796	7.83717	7.65033	5.29674	2.85762	3.71942	6.33215	8.67296	4.97859	8.40481	13.4937	6.27448	9.51856	8.47993	20.2499	7.7061	4.90572	9.18709	6.9022	6.32399	7.68037	10.2001	5.26421	13.0481	12.43
Ctsb	8.29626	11.8374	4.10012	7.37454	13.1818	6.63299	4.40674	8.99138	7.79485	5.45501	6.15324	8.39958	8.13889	7.47698	7.11642	14.6803	7.33078	10.3628	8.6264	5.02217	7.93414	5.89686	4.58961	8.15637	6.84706	12.0704	11.1854	8.79741	13.567	23.0381
Serpina1	15.8235	5.52877	3.58208	6.86192	3.58139	7.74004	4.24339	3.91482	5.30613	6.66111	4.7008	5.09066	4.58297	5.97504	5.55565	9.90909	3.83089	12.7703	10.5614	7.03495	9.86779	7.05458	10.307	6.47425	6.68414	6.68921	5.98637	4.95271	2.62169	17.08
Tinagl1	21.6612	11.5015	13.3967	6.25037	7.05007	6.74976	4.70686	10.3922	11.6077	6.61107	9.99043	10.9969	7.67785	7.1715	8.49128	20.3991	5.84613	14.1729	9.76349	7.04472	7.78686	7.97492	6.82941	8.77923	7.09145	5.72068	4.59995	5.86939	9.83813	8.13214
Ctsd	8.09662	5.1813	5.86305	19.4436	4.06976	7.07674	9.91138	9.56665	9.63086	9.41865	7.27201	5.02832	4.75187	11.1646	12.2311	6.31215	8.43575	4.79724	4.25924	5.77452	4.66072	10.8317	10.4209	18.622	7.74314	5.53964	7.30347	7.71164	5.36104	3.7157
Igfbp3	9.26859	4.97281	7.34889	17.4561	11.3452	7.343	7.87516	9.39108	8.67294	7.38678	7.54189	9.0541	8.99249	6.02959	4.13755	7.82427	9.56993	8.75921	6.88031	6.64412	5.03129	4.95153	8.00825	4.27521	10.4399	11.0838	7.01628	7.73389	6.63116	21.3635
Fat1	8.51439	8.8221	3.60216	5.27459	12.1467	4.86263	12.7948	12.2338	6.16075	7.58196	5.16696	8.27491	9.68176	5.6841	10.7179	7.00847	9.59913	8.25001	9.5168	4.85607	6.81766	7.77503	4.85682	5.77514	7.06143	5.96507	8.31852	11.8189	9.82003	2.33938
LOC100359493 /// LOC100359496 /// LOC100361392 /// LOC100361596 /// LOC100361620 /// LOC100364435 /// LOC100909821 /// LOC100911590 /// Tmsb10	21.0697	14.9261	10.0636	9.16421	9.61715	8.24452	4.61948	5.58086	8.1705	9.76897	6.32989	7.3347	9.24811	9.60079	7.55741	5.90425	6.84887	16.8931	7.36212	8.59339	7.88663	12.0519	4.28312	11.9994	11.6018	7.10559	9.47718	5.25976	13.567	11.74
Psmb7	6.15195	9.15028	10.2443	6.59661	14.7763	5.74547	5.2539	5.03921	6.56458	5.98549	10.1524	9.78653	6.10303	4.22944	9.29977	7.02083	8.01226	8.07134	15.7457	9.96129	7.44004	7.86248	7.29308	5.7709	11.5718	6.24568	4.65441	10.6931	19.6853	13.6338
Btg1	14.8993	14.8335	15.5612	7.06876	9.10791	8.66025	6.98241	14.124	5.65361	6.23072	6.18759	10.2229	8.70035	5.59319	6.3944	3.16844	6.47406	5.50298	5.60061	4.4457	7.91989	9.37834	6.30286	9.22412	8.06041	4.40818	4.69898	7.4313	15.7302	9.9828
Shank3	5.71939	7.35497	3.89531	8.79548	6.85806	5.03079	3.76473	4.23981	20.971	5.34991	7.22785	8.74762	4.54646	5.91321	4.82931	7.82427	7.1312	6.27572	22.4718	7.67982	9.52572	2.90262	4.23989	4.14386	3.73437	3.52111	6.08045	4.05829	2.9264	7.3775
Fabp3	8.89149	11.0151	10.0355	7.45548	6.22777	6.0491	15.9175	10.3997	8.45224	7.69706	6.3348	6.74772	6.81056	7.60426	6.85269	7.26392	9.33628	5.48958	6.83405	8.30026	4.93627	7.72922	11.2068	11.241	10.7744	14.1614	7.42725	13.7012	18.373	9.72766
S100a6	21.5688	12.5401	14.0472	7.97709	9.66724	8.56683	5.38307	4.67686	7.46615	9.88407	9.59297	8.62295	11.4985	9.81899	11.522	15.3601	7.73967	13.1187	11.2899	11.4074	9.6445	9.14513	6.25571	6.58866	10.2556	9.09696	9.4029	13.7012	5.31579	3.56837
Psme1	21.3544	10.0807	3.50578	6.2054	9.56706	5.60534	7.57504	17.3627	7.68685	7.45684	8.39569	6.44124	5.36811	4.27672	7.23315	3.65874	6.6785	7.53534	8.35273	7.99737	6.21904	6.73808	9.48966	10.1266	8.99507	4.28146	10.7992	10.9512	4.33228	3.84147
Ankrd1	21.6058	7.89935	11.6619	6.35829	6.60761	5.33909	6.82666	4.86364	6.12788	6.01052	6.28082	7.94766	9.4444	8.78982	9.72779	3.12311	5.7293	8.72348	10.9892	6.66855	5.86271	19.3355	8.85308	4.97009	6.46976	6.19137	6.05074	4.49883	11.6332	12.7103
Fdps	12.2632	9.37807	9.3086	18.9445	13.9332	7.05339	6.35939	10.7359	12.4107	10.3045	7.23276	8.58659	6.03912	11.6446	12.832	5.64056	6.92189	5.98539	21.2114	10.8113	9.59699	10.1946	7.99646	12.0969	12.6866	11.5273	10.3585	10.8444	6.29025	7.08642
LOC100912469 /// Scd	7.42005	5.43997	7.2244	10.0725	6.72032	7.97827	21.1752	7.28799	5.87431	10.6097	8.13563	9.85925	20.2993	4.08397	9.34733	5.3439	7.1166	5.15458	7.91332	10.7527	7.78686	10.0072	9.03384	10.9952	10.9116	12.4778	9.18009	12.6644	6.33852	7.94887
Fh	10.5922	9.72941	15.5692	7.5589	15.9868	6.41811	8.83628	4.72543	9.88443	11.8108	12.3212	8.6697	7.43136	11.8373	10.8951	6.65825	7.73967	6.9234	22.6299	8.73995	9.30243	9.54492	7.19878	8.88515	10.7486	9.24179	9.18504	12.077	16.7559	4.97703
Hsd17b4	11.6828	9.43598	11.8265	6.54715	8.99103	7.85215	6.00229	5.95441	5.64422	7.67705	7.55661	10.9137	11.3707	11.8664	14.0037	7.29688	7.2967	5.31092	7.52016	8.71552	5.7772	6.255	23.062	9.34276	14.2	11.8804	9.23455	8.49927	7.23153	21.0868
Selenbp1	23.1438	9.97264	9.87482	7.61736	15.2731	7.26359	9.10221	10.7359	8.18928	10.1343	7.29655	5.95815	8.01108	7.92793	21.3665	6.84366	7.50602	12.1137	9.81745	9.40924	5.64892	10.5777	8.00825	8.39365	9.26947	7.3183	11.542	5.69139	8.48958	13.6338
Pitpnb	4.72118	8.20436	11.8305	6.99232	10.452	5.42317	5.54642	7.415	7.9498	7.06649	6.63903	12.5448	10.1428	10.2881	9.82723	8.90788	7.57416	12.9758	13.352	8.00714	7.74885	6.70476	7.36774	9.34276	22.3162	14.012	9.43756	14.5734	10.8639	20.8137
Cib1	13.2688	12.4397	14.9227	6.59661	13.5951	6.49285	8.89707	20.7956	5.44231	9.60382	6.39859	10.1657	7.52265	4.95314	6.45493	7.82427	9.29247	7.91501	4.90294	5.67681	7.11222	5.53455	6.4679	8.80041	8.01325	5.90171	4.40684	9.34475	19.7547	8.44118
Hmgb2 /// Hmgb2l1 /// LOC100911856 /// LOC100912122 /// RGD1559962 /// RGD1561694	9.9008	5.71024	4.37319	6.49319	10.381	6.22193	8.38041	24.3593	10.9363	8.30262	6.66847	9.44888	6.34496	10.9573	9.09656	18.0836	7.41353	9.71062	11.1665	10.8846	7.26901	6.27583	8.51515	4.43198	8.89646	11.6722	8.82853	15.2898	5.36708	10.1194
Sdha	11.5904	9.56725	11.6137	5.22063	10.8068	8.77236	21.1942	4.93088	5.32022	6.89633	8.12581	6.92953	5.42745	4.70221	8.22755	4.97721	5.94835	26.1883	5.71625	9.89778	7.43054	6.83803	4.735	7.44455	9.58245	7.703	4.97626	12.1882	10.1549	9.05927
Cd74	3.73775	3.28561	6.19636	7.17219	9.64637	9.3796	12.1375	18.9801	8.09537	7.90225	7.15425	6.2854	5.87935	7.89156	7.07751	6.17206	5.55406	10.4834	9.18531	7.09357	6.05275	5.60951	6.00029	5.86412	4.95201	3.96465	10.7992	4.44988	15.7302	3.61868
Acox1 /// LOC100910385	7.33502	5.67163	5.52573	8.26937	10.7901	12.0094	11.3284	20.6537	7.86528	11.956	5.87355	9.93198	7.83305	8.06248	11.2756	7.51937	6.54708	10.8541	10.835	8.31003	6.14302	8.21229	21.6121	13.44	10.6929	13.4192	9.39795	14.3776	8.25124	6.01196
Cd151 /// LOC100911730	6.55493	7.31636	8.70221	9.38005	6.72032	8.38465	7.60543	4.55359	6.90266	6.11061	6.22685	8.91904	8.23018	6.61145	9.10521	20.0984	6.34263	8.77708	10.9314	9.64863	5.11681	8.60375	9.08885	6.65221	9.68107	10.5407	10.0813	8.04093	4.63095	17.5903
Serp1	13.9306	15.6674	14.6295	5.82768	13.3112	7.19819	14.6524	5.10271	6.87919	7.61199	8.23867	7.89571	12.1285	9.96446	11.4572	4.16965	8.70347	8.00881	8.98873	7.9876	7.28801	5.7636	6.70367	9.58003	9.61247	10.6358	8.66018	14.1239	19.0789	10.202
Pam	4.821	5.25079	4.83099	6.31332	8.18125	5.68942	4.68407	6.04406	6.46597	5.9955	21.5658	9.53199	8.89663	11.0809	11.401	8.83784	6.94136	7.5934	5.53123	10.3375	5.22608	9.35752	5.27334	23.6937	11.7733	4.15473	7.46687	8.08098	5.51491	5.78557
Cd36 /// LOC100365047	4.48826	9.31629	4.45351	6.93386	11.316	6.647	4.16741	7.36643	6.02457	5.72025	6.32008	9.77094	9.27094	4.06215	6.2474	7.78718	4.83364	11.4616	8.87309	6.93724	7.33077	8.27893	18.1502	8.07163	9.17943	8.47692	9.96737	4.79252	7.23153	17.5903
Prkcdbp	9.642	23.8332	10.3447	6.78098	13.5951	10.2578	11.2866	8.61036	12.777	9.75395	9.20042	9.3346	18.8158	7.18241	11.0637	7.64298	7.86623	9.80889	10.7194	9.34085	10.0531	12.1185	10.6528	4.95738	11.9406	8.07865	9.47718	5.78484	8.17883	12.1641
Ywhah	3.808	5.3589	4.54587	6.89789	6.0775	8.19781	20.3736	8.25175	8.29259	12.2713	4.95596	8.45153	5.85197	13.4484	5.49944	5.10493	6.32316	10.604	8.60713	4.56783	6.43283	7.43771	7.79213	4.85145	7.68311	4.73404	4.94655	5.72254	3.75002	4.32301
Qdpr	4.92822	5.51333	7.87898	19.2098	3.50208	5.7735	7.89035	8.16583	4.85534	6.45092	6.49673	12.0202	4.72448	17.0778	3.6663	10.5312	7.95871	10.0367	6.87645	4.47501	7.05996	4.98901	6.26357	5.11415	7.43873	6.44029	7.71939	5.20191	5.39423	3.79116
Ifitm2	6.18522	6.26234	8.68214	6.79447	7.85567	13.7705	9.56947	8.01641	8.0578	26.8046	7.3309	5.00754	5.87479	21.3727	12.2311	6.24211	8.52824	6.35166	6.13253	9.21383	9.86304	7.7667	8.37762	6.52934	6.07532	4.29051	10.5665	6.69262	5.59938	3.72648
Sh3gl1	3.09446	6.47469	5.34903	8.80897	6.75371	10.1597	8.10689	3.6496	5.75692	7.38678	8.1896	26.6117	9.6772	9.6517	25.3658	10.3706	6.28422	10.3494	12.2304	4.13792	9.88205	10.1987	11.1204	10.2622	10.4228	9.51787	6.01608	10.0523	7.78362	8.35853
Ramp2	9.43127	4.7373	3.3572	6.79896	10.0888	7.32898	20.1001	9.66004	13.1808	4.90951	9.64695	5.78153	6.16237	6.17505	5.1233	20.3991	6.52274	10.8362	7.69361	5.48628	7.93414	7.42105	4.94327	9.84697	10.2513	7.10559	7.19453	6.81721	3.61727	5.97603
Acadm	10.215	7.28933	8.35284	8.103	6.21525	15.0877	4.96139	8.14342	8.02963	6.22071	8.42023	7.84896	4.99836	4.05488	10.2596	6.27919	6.59575	7.6068	22.7301	11.7493	8.80357	12.2476	6.55042	11.0037	10.0241	8.17369	8.4126	9.93658	5.21322	7.41703
Ap2b1 /// LOC100912146	5.41623	5.1311	10.3768	6.94286	11.3536	6.41344	5.85413	5.82367	4.39047	6.55602	7.44866	9.01254	6.02542	4.84404	9.25653	4.47866	5.87046	5.09651	6.31755	7.31342	6.71314	4.95153	5.32442	15.6179	6.3883	4.58469	5.30306	7.08866	19.4862	8.44118
LOC683062 /// Vdac1	12.5368	11.7641	7.90307	5.98956	12.1216	12.5046	12.1793	8.34514	9.3679	13.117	5.96187	7.26717	6.38604	5.81866	10.4757	7.05791	9.29247	5.30198	8.01739	7.50395	6.19053	22.5505	10.0044	14.0713	13.6212	11.6179	6.98657	11.4495	18.6867	10.299
Fasn	12.3187	13.9918	7.90709	17.9687	9.67141	11.7852	12.2439	5.83487	5.8837	12.3313	9.43595	9.18915	7.86501	7.82246	9.10953	5.65704	8.63533	10.2645	10.2029	11.0116	26.5675	5.87187	9.52502	13.779	11.3746	8.09222	7.58075	10.6619	3.45436	7.16548
Cd63	8.91367	10.5788	5.31289	5.64332	9.53366	6.94128	7.26733	17.2805	5.20752	9.61883	7.0512	10.6956	13.1464	6.0405	10.3071	4.59815	7.1458	7.34773	6.32911	9.27245	6.48034	10.9109	7.79999	22.5709	11.2717	9.77132	6.20918	10.2792	11.2138	12.2755
Timp1	21.9015	14.7331	13.4208	5.89963	14.0793	6.97398	4.47513	10.3212	12.19	6.27576	6.46728	8.47231	19.6876	5.25498	7.31097	4.16965	7.30644	5.02505	5.28454	6.94701	7.23575	8.67455	4.71536	11.813	11.2717	12.8534	11.7103	7.46245	8.98737	8.19323
Eif2b2	8.79167	18.4048	10.7422	9.16871	7.07511	6.62364	5.65659	5.00932	6.08561	6.20069	7.79214	7.13731	7.27159	12.2774	12.2181	5.94957	6.43025	8.22768	14.7744	10.23	6.42333	6.73808	10.2598	7.77927	4.03449	10.0112	6.7687	12.8735	3.42419	9.05567
Itfg1	12.5479	8.62906	7.4774	7.94112	3.47286	10.0336	8.67673	5.15875	8.34424	6.541	4.22483	7.82818	13.4157	22.0673	9.76238	7.47405	9.53585	5.44045	4.29393	6.65389	5.36861	13.447	12.4682	9.45292	6.62411	8.83446	6.77366	12.1615	12.1189	10.3889
LOC100359517 /// LOC100909755 /// LOC100911728 /// LOC100912121 /// Rps27	4.11486	6.67159	9.04757	6.11097	4.37864	8.91716	11.1916	18.9801	4.4703	30.493	7.6891	6.38929	10.5262	9.81899	10.1861	6.97962	5.99216	6.56606	5.08796	6.22398	5.73444	3.81047	6.47183	4.33877	5.88238	5.90171	5.73879	6.93291	4.18747	4.9339
Ubr5	6.25547	8.58659	7.63401	6.02554	7.34643	6.06778	5.09815	8.64772	25.4178	6.06557	7.60078	9.45408	11.7587	11.59	22.3609	7.98907	8.01713	12.8105	10.9044	8.70086	4.94102	13.9592	14.2718	9.34276	15.3105	8.39093	7.25395	6.10523	5.03823	8.12495
Sh2b3	6.7213	7.70245	3.4857	5.91762	7.37982	6.09114	4.80183	24.3593	9.43834	4.45409	8.45948	9.98392	11.7313	12.8156	9.17871	6.4646	6.9657	8.12941	4.54833	12.6287	5.26409	10.661	8.22044	7.06745	9.83113	4.83361	10.5764	7.92078	12.846	7.2661
Atp6v0e1	12.9028	14.1926	13.9147	5.76473	10.0012	5.60534	5.9567	8.05003	6.83693	6.31079	11.2908	7.77624	3.60156	11.9755	11.7641	16.7033	7.75427	9.69276	9.35491	7.36716	6.96019	7.03792	11.1204	9.68596	9.6339	14.7407	11.0171	13.8703	9.54851	23.0381
Pim3	9.04307	9.74485	6.41321	6.97433	8.3357	8.54814	19.6404	6.97047	5.771	8.30262	9.94136	11.1683	5.52331	5.54228	7.35853	6.77773	8.00739	8.25001	23.235	9.23826	8.6943	8.80781	8.36583	10.0588	11.0016	7.53554	9.92281	10.6397	7.88318	5.67776
Thra	10.1337	10.5286	8.64198	5.99856	4.16993	6.49752	4.96139	15.9021	7.50371	5.53008	8.4006	6.15554	6.34952	6.51326	6.80945	10.4365	5.36422	8.82622	23.4393	9.24314	5.81045	13.5594	9.3089	8.91057	9.74538	5.94244	9.37319	4.79697	4.52838	7.35234
Cyth2	8.2519	3.15434	9.08773	6.754	4.34107	5.40448	4.75625	9.42097	7.78076	5.27484	6.82058	9.79692	5.59634	4.12398	6.87863	18.5162	7.83215	9.44709	7.09616	8.19767	5.93398	4.55174	2.8135	5.55905	7.05715	11.1608	7.9224	11.9257	15.6125	3.58993
Oat	3.49375	7.51326	11.947	8.08051	3.9821	8.06235	5.58441	17.2805	7.14215	7.06148	7.81177	10.2333	8.94228	4.30581	5.17951	6.62529	8.00252	8.79048	5.53894	26.0782	7.52081	10.6485	11.0968	7.87249	10.8687	6.18231	10.9527	8.63276	8.28744	7.45296
Uso1	5.63806	6.84147	9.56962	3.72774	5.98985	6.27798	4.85502	5.43144	5.86492	7.01144	7.62531	9.1424	25.4529	13.212	9.30409	6.8107	8.89331	7.98647	8.25637	7.26945	4.65596	9.24924	14.2718	11.9358	14.2	11.9664	19.1326	9.3136	7.63881	8.90475
Gnb1 /// LOC102551815	3.60466	6.66001	7.89504	7.4195	7.82645	6.08179	7.44968	8.09486	6.65379	10.0042	6.42803	24.6533	7.2442	20.4526	8.09352	8.4835	8.28972	11.5062	12.9859	6.65389	7.51131	12.4142	14.1932	13.0544	14.2	9.87541	10.3239	6.23873	10.5893	10.9387
Gnb1	21.6058	4.08095	9.33671	7.2936	13.5951	8.28189	8.90466	9.13333	8.79033	6.37585	9.01887	24.7468	7.45875	9.12439	3.87815	7.54409	5.76824	7.5666	8.81142	5.87711	6.86517	9.43248	4.23989	9.27073	7.10431	6.53081	6.25375	6.27878	10.4898	11.1723
Car2	7.85261	8.52095	5.00367	6.27735	7.55514	8.54814	8.60835	7.26558	5.09482	6.99642	6.81567	7.77104	9.6772	4.76039	19.4383	4.97721	6.28422	5.26178	6.71071	4.65088	5.85796	8.01657	7.99646	6.94033	3.30563	7.30925	7.39754	5.78929	18.0562	9.81031
Akr1b1	11.5201	14.1694	8.35284	5.58936	12.706	7.60458	6.99381	5.22225	5.21222	13.9578	5.43193	8.197	7.60482	8.1134	8.17567	16.9629	5.1257	6.41419	5.41945	7.41601	7.77736	8.14566	7.97681	12.5248	11.0445	25.3267	5.88239	13.5499	11.2651	11.316
Acadl	8.92846	7.96499	6.85897	16.858	11.4496	3.18103	5.01837	5.62942	5.92596	6.15065	6.57524	8.02558	8.42647	4.97132	10.7784	6.5882	6.34263	5.72185	4.89523	21.823	6.82241	12.8765	5.11223	10.3639	12.3993	11.1608	8.3928	12.8913	6.32645	6.75582
Fuca1	13.2688	12.459	10.5615	7.84669	12.1717	8.43604	3.30506	4.86738	8.20337	10.5397	8.92564	7.63599	16.538	5.62956	5.30921	8.40933	9.65755	6.61073	7.20023	8.97933	7.37828	10.3403	8.88845	6.35562	10.8044	5.01464	4.68412	8.59272	8.18487	21.9097
Cox8b	11.986	13.5401	15.4005	7.8332	10.7024	6.86187	11.355	10.3474	9.98773	9.6939	9.94136	8.1918	7.66416	11.3246	11.7166	9.35286	8.73268	8.84855	8.584	9.84893	7.39728	11.3523	23.062	12.7112	8.68638	14.7407	8.35814	14.5734	18.6867	10.299
Cpt1b	14.4926	13.7563	13.0834	8.31884	11.3786	8.80505	5.19692	4.576	6.54579	10.895	7.59096	7.70351	7.96999	8.11703	9.13548	7.96435	6.73205	18.4788	6.25202	8.6569	8.56602	5.61368	7.25772	8.32162	7.6188	14.1614	8.43736	15.1296	18.373	10.2056
Pfkl	6.92464	5.03844	12.1759	17.9687	9.94273	9.40763	8.29304	4.67313	6.95901	6.25074	23.926	6.12957	11.6309	11.9755	12.8969	6.20915	7.07766	6.86533	9.70952	10.4694	11.7492	5.59702	11.1243	11.4359	8.33481	7.93382	8.43736	6.10078	4.64905	3.76242
Dgkz	6.37008	4.24696	5.35706	6.64608	5.58078	8.74433	25.164	12.2002	4.62056	12.6416	8.02768	5.17377	7.28985	6.29143	5.5643	4.58579	6.70284	4.84191	4.90294	7.56746	7.32127	5.11811	5.4148	7.88944	3.77296	6.88382	6.68948	4.32973	3.84957	3.12996
Arl3 /// LOC100910869	14.0748	15.0844	10.7342	5.44547	10.8235	11.4769	13.4444	4.83002	8.24094	28.0007	5.88827	5.47505	11.6537	11.2446	12.4083	4.41686	7.17988	22.9097	5.48883	6.26794	7.28326	9.74898	6.70367	8.93176	8.63064	3.78361	7.65997	7.16875	12.1159	7.58952
Arf5	3.09446	7.5094	11.0073	5.96258	5.58496	6.49752	5.23871	10.2017	12.2839	5.65519	8.116	5.63608	7.5546	16.6486	8.08055	17.8075	8.15342	7.56214	8.22553	5.50094	7.27851	5.90935	9.58396	3.91506	4.7848	10.7625	5.80811	8.57492	3.44229	5.09921
Lum	8.85452	12.405	13.0272	8.82696	11.6499	6.23127	8.36142	4.72916	7.89815	9.90409	7.29164	7.55807	5.94326	7.16423	8.04596	5.55403	8.06094	8.41081	15.1058	11.6516	10.0151	5.03482	3.32826	10.5334	9.47527	6.82951	11.2746	10.1324	7.69915	22.2331
Prpsap1	5.94861	3.92651	7.88299	9.51495	10.5021	5.15691	21.1752	10.9525	10.3634	7.13155	7.03158	10.5709	4.44603	6.49508	5.22707	6.4234	17.3145	8.14728	4.84898	10.3033	6.08126	6.57567	4.94327	2.54648	7.48589	11.3418	8.75921	14.916	6.17863	8.88318
Sec31a	6.07801	7.17737	9.85073	6.82594	9.21643	8.19314	13.0569	9.21551	10.7203	6.536	8.05712	4.91404	7.86044	5.59683	10.532	8.37637	8.35787	12.6274	23.4393	4.0109	10.5614	9.38667	7.87072	9.10548	5.5351	12.7357	7.64017	6.82166	7.43668	11.4669
Asl	4.821	11.7641	7.81071	6.68655	8.38161	7.01135	5.10575	6.69031	6.35796	5.26984	6.42803	6.90875	8.49037	7.46243	9.11386	6.5264	5.40803	8.26341	16.4819	9.8929	5.17857	6.63813	6.91586	5.53786	3.67435	7.79804	7.75405	10.9423	13.5399	22.2331
Gfm1	5.05392	23.7946	8.55765	6.56963	6.98328	11.4956	7.97393	8.40864	4.55012	6.59605	7.1935	7.92169	7.44505	8.46252	5.36109	8.98616	7.89543	9.49622	22.5104	8.85231	8.50901	9.72399	3.15929	6.63103	6.23396	7.83425	9.35834	5.93614	5.84978	2.86044
Cox6c /// LOC100365711	9.09113	7.08857	9.25238	16.5522	3.94871	6.11916	5.31469	9.23046	8.50859	5.47503	7.25729	8.40997	11.9048	11.7501	11.829	4.27265	5.47618	6.843	4.7372	21.823	5.52539	4.62254	4.94327	4.62265	7.59308	11.3599	4.34247	11.8189	11.5427	10.9387
H1f0	10.3075	7.71789	10.5294	8.40877	5.78114	5.03079	8.03091	4.70301	18.7076	10.0843	6.67337	7.55807	6.43168	5.32771	6.71866	5.46751	6.93649	5.83352	3.01423	10.8602	11.8062	10.1071	11.1361	6.02089	8.41627	14.7407	6.5954	11.5163	19.7547	10.4356
Ccng1	13.938	14.0883	11.5494	7.22165	9.33748	8.16044	8.54757	5.73775	6.94493	9.6989	10.1916	7.96324	7.21682	9.74626	10.372	5.38923	8.59152	6.94126	17.592	8.44682	9.31193	8.46633	10.0594	11.2452	10.9159	14.7407	8.49678	14.916	19.6853	10.5829
Tcn2	12.6773	13.0073	8.11189	7.38803	4.54143	8.55281	9.60366	7.22448	5.27796	6.23572	6.73226	10.6592	7.29898	22.0673	12.5121	7.38752	8.09014	9.00488	4.75262	9.47275	5.65842	7.15036	5.93742	7.91062	5.86952	6.84761	7.46687	7.1554	19.4862	14.2232
Polr2g	6.2222	8.56728	7.46134	6.92487	9.39174	7.03003	4.60049	22.1553	10.1521	6.83127	7.51736	5.75036	9.97847	9.85899	5.11466	6.16794	19.6364	6.43206	4.44426	6.1165	6.73214	9.74481	7.97681	6.27088	7.33154	4.68878	5.69423	10.7732	6.9057	7.18345
Degs1	12.8843	14.1926	13.742	8.16595	13.1902	8.62288	11.9932	10.6275	12.0679	12.5765	8.47911	8.34244	25.4529	9.20076	14.1377	7.67182	6.37184	9.37562	9.07353	10.2446	8.25721	11.5022	13.2502	7.55471	10.7186	10.1877	8.98698	14.4399	19.0789	9.50486
Tsc22d3	3.49375	4.14658	8.51749	5.27909	7.8515	7.0347	7.29772	5.47253	6.3157	5.76529	7.46338	6.38929	10.9005	21.3727	9.76238	6.59645	4.67787	5.27072	6.69915	5.19805	5.40187	10.865	6.34608	9.07582	6.13963	6.96981	5.96161	8.10323	11.2621	5.85385
Clns1a	4.0631	4.7759	4.71052	16.251	5.31781	4.79724	4.86641	10.6985	28.2164	5.46001	6.10908	7.30353	9.22529	9.04075	8.38752	5.40159	6.68337	4.97145	6.20577	7.73844	7.29751	5.84689	7.04946	7.44455	2.49958	7.45408	8.33833	6.48792	4.88739	3.41025
Slc25a1	8.48111	7.51326	14.2279	17.9687	13.4865	5.44652	8.72232	12.5775	11.8942	10.4046	5.9815	11.8436	8.75513	10.5754	12.4256	4.78356	7.16041	11.0328	8.63797	12.6483	26.5675	11.3606	11.7059	11.9782	14.766	8.07412	10.3585	7.85849	4.55553	5.08124
Gsta1	6.89137	6.52102	8.43316	8.13447	13.5992	9.25815	25.164	8.95776	8.22685	14.8837	7.30636	9.30863	8.82816	12.4192	10.7611	8.8708	6.43512	9.01828	6.66446	6.62946	6.21904	10.7568	5.7881	7.50386	8.22333	19.8866	5.56054	4.12059	6.82424	6.59771
Cdk1	14.023	11.4321	7.35291	8.0985	10.0554	11.3929	11.5373	8.40864	5.07135	11.9059	8.46439	8.97098	8.80534	8.69163	7.67847	7.00023	4.10835	6.90553	6.82249	9.15032	8.75606	7.06707	13.4348	7.21574	8.31766	10.5769	6.20918	7.72054	6.80011	6.35694
Furin	4.72488	12.5556	5.20848	6.32232	7.53009	8.11373	5.16273	4.41164	19.4073	6.15065	9.21024	5.57894	8.01564	3.40755	7.00401	8.37637	8.84464	11.5018	23.4393	7.2841	8.89859	3.0109	5.52876	8.13519	6.87707	4.76572	4.88218	7.4224	5.77134	8.53102
Bin1	12.9435	13.2158	12.4249	6.84393	10.0095	9.06664	6.49235	11.7333	10.5183	8.2826	10.1916	12.1812	6.32213	21.3254	13.3854	8.1786	8.59152	6.53479	8.29106	8.52011	9.635	13.5553	7.79213	11.5291	10.5043	14.7407	10.2892	15.4678	19.6853	10.299
Pttg1	14.548	13.9918	12.9951	8.42226	13.6201	7.50181	5.93011	24.3593	8.41468	6.67613	5.93734	9.03332	6.78317	5.33135	5.14924	6.24211	7.83702	8.73688	14.5277	10.3033	7.13123	11.2482	8.69197	9.80884	8.51488	10.5407	13.0125	7.81399	8.6193	5.79276
Cox6a2	13.938	14.1269	11.5494	7.29809	9.2373	8.16044	8.36522	5.74896	6.94493	9.6989	10.1916	8.84112	6.93837	8.57162	7.40177	8.4835	8.59152	5.52978	8.13688	7.30853	9.31193	5.19723	22.5787	11.0503	8.99507	14.9172	8.49678	15.1296	19.6853	10.5829
Gabarapl2 /// LOC100359937 /// LOC501441	6.38117	8.17734	6.02368	5.19815	9.20808	7.85215	14.622	10.239	11.0677	8.63793	7.08555	7.32431	5.78349	20.889	3.21233	8.25689	9.95448	8.01327	8.7536	6.6832	5.40662	6.7714	4.29883	7.64369	6.52121	5.96507	9.85844	10.0745	5.8347	6.03352
Clu	3.11295	3.54815	8.65804	17.8158	7.73045	8.62755	6.23402	18.9801	9.28338	5.16474	7.15425	5.54778	6.92924	8.03339	4.0165	6.62117	5.63681	4.20317	5.48497	6.1165	6.23329	4.18111	5.87848	5.96157	4.92199	4.11853	11.9826	5.39325	7.09577	3.01137
Psmb8	8.83234	14.9261	12.6457	8.00857	10.1264	5.31106	4.60429	21.9574	9.43834	6.93136	11.8403	9.13721	10.8914	3.55666	8.70745	10.9639	7.50602	12.4666	12.6467	6.7516	8.17644	7.54182	6.61722	9.12243	8.72068	3.72478	9.47222	6.18533	16.7559	10.1122
Ica1	4.79512	8.28158	5.1884	5.55339	2.9177	11.7665	19.6898	4.76652	6.00579	7.13655	5.32888	9.22552	4.09455	7.27333	3.66197	5.83421	7.22856	9.22822	8.21397	10.4596	5.20233	9.57407	4.9747	4.55486	10.2856	22.0319	5.7586	8.29457	9.13218	11.1543
Slc27a1	7.16865	13.9918	10.0435	16.5522	13.4865	14.0367	11.4157	11.7557	14.5895	13.4774	6.34952	6.03087	6.76491	3.67667	7.31097	7.59353	6.13332	10.4744	8.14459	7.69448	23.2181	9.50327	6.17712	4.87264	9.23517	7.02865	10.7794	7.28445	3.67158	4.51346
A2m /// LOC100911545	7.22411	11.6907	4.28083	7.36105	5.52652	6.14252	11.9856	8.68134	10.8236	6.48095	6.54579	8.89307	8.71861	7.73155	10.4239	8.73895	8.92739	9.26842	5.034	7.70425	4.96953	3.08169	7.31666	10.7579	3.91873	8.82994	27.5749	11.4095	3.9612	7.83028
Ifrd1	8.23341	11.8761	6.75456	8.19293	12.0298	8.05768	3.09992	5.28575	7.91224	9.70391	9.39179	7.67754	11.2201	10.3645	11.0292	7.2186	6.37671	4.92231	4.27851	8.15859	9.88205	5.08479	17.1089	8.27925	7.88462	8.86615	20.5636	11.0891	9.76271	6.43959
Ahcy	11.9712	9.16958	11.5253	8.103	6.66605	5.96969	6.11626	5.05789	7.7338	6.95639	6.49182	6.52955	8.21192	4.67675	8.69016	4.1408	7.50115	6.95466	7.19252	7.75799	21.2797	11.5897	10.4681	11.1139	12.3993	7.11917	10.4972	8.66836	5.10461	10.3961
Eef1a2	12.4703	14.8335	13.3967	6.39426	7.30886	6.39009	5.21971	9.83561	9.5886	8.17751	8.21904	9.17357	8.07498	11.9755	11.8203	7.33808	9.46284	6.69113	6.14024	7.01052	8.72281	5.96766	8.77056	10.1944	23.581	12.5683	9.93271	13.3051	19.4862	9.84265
LOC100910418 /// Plat	12.2041	10.6869	8.09985	5.90862	5.6267	7.43642	5.87693	3.00709	5.86492	5.79031	8.29755	9.69822	10.0972	4.91677	8.57343	6.27919	5.67576	8.19641	5.87814	25.7704	5.76294	11.0608	5.88634	4.30487	7.49018	8.50408	9.99213	4.27188	11.5759	6.60849
Ece1	8.72142	8.0422	3.47366	8.00407	11.2158	19.4739	4.41434	9.27155	7.62111	5.7753	6.49182	8.72165	7.66416	7.34242	9.12683	20.3991	5.38856	8.77708	13.1169	11.7591	6.26655	6.15506	8.48371	6.45307	7.67883	11.4414	6.99152	7.77839	5.25847	5.85385
Gls	11.4536	8.80666	11.2522	8.17045	11.8378	13.5089	9.80881	12.0433	13.2982	9.0383	7.52717	10.5293	12.1878	8.53889	6.42466	9.78548	8.29945	12.2745	11.6676	11.7005	5.72969	10.7193	21.5845	8.10977	13.7413	7.89761	11.0963	24.1851	10.4717	6.73785
Plod1	13.8234	14.9068	4.38524	6.754	13.1902	7.28227	8.92746	5.91705	5.85553	8.09243	8.62632	12.3734	4.97098	8.60071	11.2756	8.24041	5.98729	9.62129	16.2661	9.01353	6.76065	7.99991	10.5899	12.5629	9.12799	13.3784	10.9527	7.4491	19.0789	10.5829
Timm8b	11.8159	16.123	8.11189	7.9681	14.0459	12.1402	12.3161	9.17816	8.69172	12.8418	8.09637	7.09056	5.8611	9.60443	9.10953	6.9343	7.23342	7.47727	7.85165	23.6062	8.7038	7.99991	10.2009	11.4867	8.82786	10.0881	8.39775	12.9536	19.4862	13.6338
Slc6a8	8.98762	7.65226	9.09576	6.05701	7.90994	5.02612	5.36787	8.13221	8.74338	5.46502	5.39267	8.73203	8.16628	18.4561	7.1683	3.49393	9.53585	5.38238	4.06651	7.24502	7.75836	8.34972	8.21258	4.74553	8.79356	8.6127	5.54073	5.46	13.3438	8.35853
Sptbn2	18.5039	11.5479	11.9952	5.96258	6.03994	5.73146	4.35736	4.06798	5.63483	6.30078	7.09537	8.08272	6.10759	5.9314	7.78223	11.45	7.4184	12.1182	11.8873	7.39647	6.79866	5.28885	20.0835	5.66074	6.9714	14.2836	6.44686	11.8144	6.39886	5.71729
Atp1b1	11.1652	15.0149	13.5332	14.9874	8.39413	8.17445	7.06599	8.56553	8.1705	5.78031	6.91381	7.46976	7.30355	8.06976	4.79904	5.6076	7.49141	8.77708	8.04437	11.7884	8.41399	9.76563	4.90004	9.46139	5.97242	10.5769	5.82297	6.82611	19.6853	9.84265
Hdgf	7.22411	10.2661	6.67022	5.34654	7.42991	11.6544	19.6784	7.26184	6.61623	8.90317	5.9815	5.58414	8.65014	4.03306	5.12763	5.96193	9.72083	5.40472	5.32309	7.32807	6.61337	10.5027	6.09853	9.10548	10.813	7.17348	7.28366	9.0377	18.0562	5.98321
Coq3	11.2207	12.4397	5.47754	7.86917	4.49969	25.0699	8.29684	5.37167	6.62562	6.4259	7.35543	11.0384	8.46755	8.1134	8.97983	7.43285	7.12147	9.23715	22.5104	10.3179	8.08617	10.2112	7.92573	4.68621	7.49018	14.4692	5.52588	12.0814	11.2078	7.65061
Got2	11.0913	14.0883	9.19616	4.4607	11.4454	13.3547	7.51806	5.25587	7.01067	9.16341	7.46338	7.74507	7.2579	7.84065	8.2924	8.45054	7.30644	12.4666	10.5614	7.54303	6.99345	6.87551	18.1148	11.8342	8.95649	12.3963	7.26881	9.74968	19.6853	10.5829
Banf1	9.15768	3.67169	6.27668	7.93662	11.6374	9.63651	12.468	5.15501	8.45224	8.5028	7.13953	6.80486	10.613	21.3727	9.76238	6.10202	9.73543	6.77153	9.32407	8.19278	6.20003	13.2888	9.62719	9.98679	10.2256	7.16895	6.45181	12.1615	13.9954	7.52483
Cacna1a	11.8713	12.2235	7.75449	8.05353	10.2182	7.38036	7.48007	4.93835	6.90266	8.55786	6.03548	8.4775	7.72806	4.43309	6.86566	6.17618	9.41903	7.42367	5.44643	9.39459	5.38286	9.16179	17.1443	5.2794	10.903	9.40925	7.62036	26.8639	3.59314	4.03193
Timp2	7.79346	6.03069	7.12401	6.50218	8.04768	5.14757	7.43068	5.80872	5.82266	6.91134	7.84121	10.4514	5.13987	11.5864	4.54396	8.4835	7.2675	13.6994	23.4393	11.339	8.66579	8.8911	10.0241	7.83859	9.33807	12.9123	8.82853	6.87061	3.1768	9.11676
Fnta	7.6086	7.20053	11.8305	5.58936	10.6774	6.59562	7.81817	4.72916	5.70526	8.09743	5.58895	8.15544	10.8686	12.0046	14.9289	6.76125	7.98305	14.5883	6.08628	8.93048	6.62287	14.384	10.0044	25.2233	15.3105	13.4327	6.98162	7.75614	5.43345	9.35034
Nfe2l2	8.86191	9.72941	14.0673	7.6983	14.7763	7.44576	5.48944	9.13333	11.3119	7.8472	7.53208	10.5709	10.0515	16.5941	9.07495	9.78548	6.90242	14.2041	12.2535	8.75949	8.25721	4.70166	12.5704	10.33	9.65963	14.6773	10.1357	15.2898	16.3607	11.1974
Ppp2cb	4.4439	13.6829	8.8508	5.74674	13.3112	9.11335	8.7793	7.22075	7.35345	5.79532	7.4781	10.0774	7.31267	12.5901	11.842	14.9316	6.45459	9.21929	4.50978	7.32319	7.99116	7.37524	13.1755	13.44	12.7509	14.9172	10.2595	13.9326	12.8339	7.9848
Acads	6.58451	6.30867	4.49367	7.78823	4.97136	9.00124	8.58555	7.16472	4.2449	15.7495	8.14544	7.36587	9.70915	10.9645	11.7468	5.29858	6.86835	4.69898	5.08411	8.23675	11.5781	8.38304	22.1465	11.9782	12.8366	4.59374	9.58611	7.53364	6.64323	4.73985
Echs1 /// LOC100911186	9.2575	8.16189	12.5775	6.42574	11.0113	8.06702	21.1752	9.3089	10.091	14.8837	8.01296	4.98157	11.3068	7.03331	9.0663	7.51525	6.15279	4.86871	5.8049	4.92446	10.4237	7.20033	4.13773	9.69867	21.9089	10.6448	8.68494	10.2837	9.34638	3.28088
LOC100364487 /// LOC100912604 /// Srm	17.1508	9.38193	9.21222	7.45997	6.28621	7.14681	7.81057	10.7882	7.96859	8.69798	9.03359	6.82044	12.2334	8.34251	24.1725	5.93721	8.97607	5.31538	5.38476	11.1387	9.81078	12.0311	11.2776	13.2409	12.8066	7.59438	10.0119	3.8358	12.4719	12.3617
Psma4	11.8085	12.5015	10.3366	7.37004	8.76145	5.76883	19.9253	7.49718	4.77082	6.46093	8.92564	8.68528	9.82327	7.18241	8.74636	4.99369	6.6639	6.91	22.1442	8.87674	9.44971	7.16285	3.85087	10.2325	10.1012	6.5127	11.2003	5.3354	12.1159	4.41284
Cth	13.8641	7.63681	4.61414	8.3638	5.08406	8.69295	5.11334	8.21813	9.05329	6.71116	5.57423	8.49309	20.0391	4.62584	10.8	7.67182	4.24951	7.2316	7.15783	5.48628	5.96724	2.41538	6.14568	9.82578	10.8301	4.67521	6.12006	8.67726	3.32161	7.25173
Apbb1	19.8681	8.42443	4.39327	5.60285	3.91949	5.01211	3.98886	2.77922	6.12318	5.10969	4.88726	6.69058	6.87446	8.75709	4.25861	5.19146	5.66602	3.94857	4.96847	7.20105	6.98395	6.98795	16.5234	4.84722	4.15025	5.22283	7.05589	4.36533	9.87735	12.3509
Akr7a2	5.95231	9.28155	9.90695	18.9445	10.2975	5.60534	9.00344	8.95403	11.279	6.59105	7.86084	5.37636	6.49559	9.47351	12.832	4.70115	8.15342	9.03168	10.1065	7.55769	7.41629	23.4334	12.1695	12.9909	10.7315	11.0793	7.44211	7.85849	5.59938	4.87641
Gnai2	6.9801	16.2775	9.12387	8.00407	12.0089	26.3685	11.1004	4.47888	6.54579	8.45276	6.9089	6.51396	4.62862	4.87677	3.89112	20.3991	6.9803	12.6274	9.04655	6.54641	4.45167	4.39766	7.76069	7.83859	5.45364	7.78899	4.97626	8.70396	9.47912	6.83128
S100a4	14.548	15.0844	8.65001	6.6191	14.6595	8.80505	5.12094	10.0822	9.57451	9.49872	7.52717	12.8149	8.42647	12.481	24.1941	6.59645	5.99702	10.5772	10.5999	9.20894	9.11714	13.4512	11.03	9.52919	11.6876	12.9485	8.39775	23.66	7.30091	4.52784
Nupr1	9.72334	3.37441	4.53383	7.35655	4.34525	28.0454	13.3342	4.34067	8.53207	10.5747	5.01484	8.38919	5.95695	4.08034	4.92875	15.7145	5.01375	8.10708	4.69865	9.7903	6.82716	6.82553	9.23424	4.58452	4.75907	8.50408	6.82317	8.91311	2.88718	11.3196
Fcgr2a /// LOC100911825 /// LOC100912061 /// LOC100912098 /// LOC498276	8.58833	11.0846	13.5613	8.30535	13.9791	6.11916	9.73663	8.92414	6.10909	10.6047	7.90991	9.72419	9.49461	12.5901	14.2112	7.41225	8.02199	10.6531	9.55534	12.3942	10.9463	23.2585	7.43062	12.0969	11.4904	15.3019	10.3239	11.1914	15.9806	11.2369
Gp1bb /// Sept5	8.51439	8.51709	8.73434	7.77474	3.84853	9.93547	8.87807	4.83376	5.02439	5.32489	6.99723	6.43085	5.33159	6.62236	25.8111	7.45757	5.23766	6.8966	5.09181	4.55318	5.25934	3.63973	6.99838	6.20308	8.05183	15.6142	4.88713	3.85804	6.59194	8.60648
Slc12a2	5.7083	11.9803	4.4013	5.49043	7.62192	6.78713	8.13728	21.1281	5.34839	8.68297	19.9318	9.70342	8.07042	6.16414	6.0442	9.7896	9.37522	11.9395	10.2376	8.6227	4.48493	4.58089	5.6545	10.6774	8.56633	7.61248	5.17432	8.58827	9.75064	11.0896
Acly	5.06501	4.27785	7.48141	17.9687	8.39831	11.4769	8.22086	11.5913	12.993	9.39863	6.95307	9.49563	7.86501	12.4192	12.832	5.65704	8.09988	11.4705	10.1952	11.1045	22.7382	5.58036	10.3188	13.779	11.8162	8.09222	10.9032	14.5333	11.0539	11.7832
Scarb1	7.51248	8.10784	5.10808	5.86815	7.61775	7.86149	21.0916	9.17069	7.80893	13.5074	5.70672	10.0255	6.99771	8.93165	4.39696	6.32451	8.29945	10.1528	8.33732	9.2236	6.29505	12.0561	7.59172	8.58856	12.1078	8.23705	5.87248	8.51262	4.06679	5.55199
G6pd	6.41814	6.64457	7.13204	18.9445	7.05842	8.69295	6.35939	8.95403	9.71538	13.5624	5.99132	9.64627	5.14443	5.76411	5.18383	4.87008	6.16739	10.47	11.3477	11.7445	26.653	8.87861	10.4367	8.77499	8.33052	4.19999	7.55599	4.36088	4.47709	3.52165
Mmp11	8.63269	9.52478	8.96726	6.2144	5.08824	6.647	8.91226	7.40752	6.56458	7.45184	9.14645	10.2748	19.9022	7.03694	5.4	4.90304	8.13395	7.99541	4.84513	7.22059	10.1481	7.65426	5.55233	6.72001	3.4857	27.2683	9.75446	8.48592	8.85462	4.8836
Mmp14	8.93216	7.67928	12.0072	6.30883	4.15324	6.95062	3.97747	21.3298	6.43779	5.02962	9.49484	4.26472	3.70655	7.33515	5.80209	5.20382	8.2167	9.65702	21.7125	7.01052	9.44971	7.25864	3.22216	6.16919	4.39464	9.70343	4.62965	4.19179	11.0962	14.2375
Evl	10.411	6.7797	4.7828	6.58312	4.42873	24.6869	5.33748	24.3593	9.43834	5.89041	11.5312	8.33725	7.44049	8.65526	10.078	8.33517	6.40591	6.12386	5.61217	6.32657	7.79161	4.41432	4.29883	6.42341	5.58226	8.97024	12.7501	11.1469	3.84354	10.3026
Rrad	19.0807	5.66004	13.4408	8.44025	8.28561	6.07712	5.02597	14.4378	6.38614	3.60331	3.45445	9.65666	8.91489	6.1896	5.35245	5.93309	8.0512	6.87426	6.24431	6.98121	5.66792	5.14726	5.28906	6.15224	4.91771	9.74416	5.17432	7.44465	8.36287	3.3851
Bnip1	8.29626	14.1926	14.3083	5.58936	15.2731	9.73461	8.62734	10.7508	11.8378	14.8036	9.17098	7.45937	5.76067	7.38243	8.69881	6.43164	9.17564	10.5459	9.84058	7.44044	6.58486	9.34086	23.062	8.08434	12.4765	10.9661	8.34328	13.185	19.0789	13.4146
Pfkm	13.8234	14.8142	12.9188	8.08951	9.33748	8.64157	4.39915	4.81508	6.99188	9.68389	9.00415	8.23336	6.87903	8.57162	6.8181	8.72659	9.47257	5.64145	7.58183	6.58549	8.78457	6.04678	8.77056	8.68177	23.581	11.8215	7.96697	7.02636	19.0789	10.5829
Adrm1	8.46633	6.61368	7.0196	5.59835	7.93916	8.43137	9.8278	5.73775	7.55067	6.87631	9.65676	7.63599	23.4626	5.57501	8.40049	15.7145	8.89818	5.39578	4.30164	10.4401	10.0578	11.7479	10.751	14.0713	11.186	11.3418	8.29872	9.0021	7.9405	8.11058
Oxr1	10.13	6.96502	12.4329	5.28808	11.1783	12.584	25.164	5.29322	5.231	9.50372	7.42413	8.11388	6.81056	5.74593	5.24868	5.05549	8.78136	26.4965	7.25805	12.4968	9.6635	10.3403	7.84714	6.65221	12.8838	5.44007	4.42664	4.90822	6.47428	7.00377
Cyp2e1	15.8235	3.79138	3.18854	5.93111	3.73583	6.23594	4.77144	4.19872	4.55952	3.04279	7.5468	10.0359	4.41408	5.25498	8.18864	9.90909	3.83089	13.9585	12.5118	6.47313	7.29751	3.78548	7.02588	3.88116	3.15128	14.4782	5.98637	4.73912	6.48333	6.03352
Atp6ap1	4.14443	8.63292	8.41709	7.72078	7.65949	13.2006	25.164	5.23346	8.10946	10.5747	5.15714	9.17357	9.11117	21.3727	9.76238	10.5889	9.41903	11.1891	12.4848	8.0218	4.94577	10.1987	3.74871	7.87673	6.45262	9.06528	10.1407	10.8221	11.4914	11.7688
Gak	8.18165	14.8026	14.0472	6.28634	13.4114	7.04871	9.28456	4.76652	7.24075	10.2194	7.95407	5.8075	8.4995	6.74237	8.23187	6.33275	8.12908	8.38848	8.80371	8.44682	8.24296	5.94267	9.12814	17.6983	9.47098	14.9172	7.45696	12.2817	9.89545	22.2331
Ipo13	12.5627	14.3972	11.6819	8.6336	10.1097	8.94519	9.16299	5.19236	7.45676	15.3191	7.8314	10.0618	8.00651	10.0808	7.32827	6.82306	8.77162	8.51355	5.67385	9.2578	5.7962	12.7807	20.2996	13.44	13.484	14.6457	7.19948	15.1296	19.4862	8.81131
Sirpa	11.9712	14.8335	14.3203	7.18568	6.35299	6.36206	4.99558	8.93909	8.69172	5.98549	6.64884	7.8126	12.8314	8.63344	12.1057	8.18272	8.01713	9.01382	23.3853	10.5769	6.32831	8.90359	9.58789	10.4105	7.11288	9.60839	7.86794	7.72499	15.4405	10.6081
Rab14	10.4036	7.65998	11.1197	5.68829	3.8527	6.15186	8.59315	5.09151	6.63031	8.42774	8.09637	6.50877	21.2488	5.77866	4.54828	7.37104	7.33078	6.95466	5.00316	10.4449	10.761	12.4975	14.2482	9.29615	26.9338	7.13274	3.12935	13.0737	13.0964	12.3366
Casp2	18.9069	8.56342	8.44922	6.2099	9.51697	8.45005	5.33748	21.9574	7.71032	9.31355	9.43595	7.96844	6.34952	6.80783	2.29576	7.68418	7.45734	6.89213	5.36548	5.66704	6.87467	7.55015	5.94135	7.41912	4.56185	5.47628	8.37794	4.66792	10.6617	5.09921
Pdk2	12.4703	6.99205	10.678	7.0193	10.74	5.7735	5.42485	9.49194	8.13294	5.97548	6.23666	7.51132	5.8611	10.3972	12.9747	6.36159	9.65755	5.92732	5.36548	6.90793	5.91498	13.7593	14.1932	9.29615	26.9338	10.3552	9.0563	13.8836	15.8026	11.1974
Car3	6.31093	11.5556	9.69813	5.59835	3.58139	5.27836	4.39535	9.09598	6.92145	7.25166	6.72735	6.07243	6.53667	6.31325	8.41778	15.7145	7.764	5.68612	4.96076	16.3465	7.63958	10.1946	4.47959	4.74553	4.86626	11.3192	5.41199	14.5734	13.0964	14.9886
Acadvl	10.0117	3.50181	8.0637	18.0271	6.21525	6.27798	8.39561	5.82367	5.3343	8.00735	7.79705	8.31647	7.91978	6.62964	10.2207	6.04022	6.54708	7.70954	16.0541	9.51672	8.02916	8.99938	9.85117	7.1988	5.35074	11.1245	6.84298	11.3828	10.5803	4.90156
Bnip3l	9.642	23.8332	9.87482	7.73877	13.5951	11.902	11.7045	9.03621	7.18441	12.3063	6.79605	10.2956	7.93804	9.00074	25.8111	7.42461	6.32316	12.3147	8.87695	5.07591	5.87697	6.47572	7.93752	7.05473	5.5008	6.10085	6.23394	7.38235	7.65691	12.1641
Gyg1	12.8659	12.2351	15.4005	7.97259	10.6732	8.71163	5.53122	2.49532	6.68666	8.11745	10.1916	9.80211	7.15747	7.4588	7.22018	7.94375	8.31892	10.4387	12.4848	7.86058	9.31193	6.27583	9.26568	9.52071	21.3301	14.7407	8.49678	14.293	18.6867	10.202
Hmox2	4.50305	5.34731	5.14824	6.15594	6.26534	5.77817	6.53414	4.30331	6.81814	5.76529	6.00604	5.46466	7.44962	4.08034	4.74716	6.64177	6.8148	15.3297	4.35946	9.61932	18.8281	7.11704	7.19878	6.83017	3.36565	11.3418	8.49183	8.81521	2.13295	8.58492
Enpp3	11.5312	8.29702	5.15226	14.0611	8.16038	5.88094	6.97861	8.94282	7.71972	9.12838	9.76472	4.65951	11.1836	12.9392	12.4083	6.1185	9.53585	6.02559	6.16337	7.80195	7.69184	6.04678	6.30679	7.36828	3.73437	7.33641	11.0072	8.16108	6.63116	21.3635
Cltb	11.8898	7.94568	7.9352	7.19917	8.26056	6.7918	3.96987	9.19684	9.9173	6.74119	3.80775	7.37626	9.54026	8.92801	7.12939	9.73192	8.53797	28.7924	12.9859	8.97445	5.95773	7.38773	9.5093	9.35547	8.40769	6.16421	7.98677	6.33663	4.35943	7.42781
Dcxr	4.36256	6.61754	3.29295	5.58037	3.71078	6.46015	4.19401	4.44153	5.80857	5.65519	5.36323	7.36587	7.76915	5.85503	6.07446	6.71593	20.1718	4.49351	5.58134	6.52687	5.0883	9.56574	4.82538	6.32172	21.9089	7.50386	8.35814	4.16064	5.13478	5.25373
Idh3a	13.4796	22.0263	12.8545	9.53743	11.1323	7.46444	5.47804	10.3025	11.0584	9.4837	8.34662	7.38145	7.39484	9.96446	8.05893	7.3834	6.91215	10.1037	10.623	26.0782	11.5877	7.76253	9.02598	8.32586	8.87074	14.1614	7.90755	15.1207	9.21967	14.9886
Ltbp1	6.47729	3.8879	7.48141	6.09748	6.9165	6.68437	11.7994	5.34179	6.63501	5.9955	5.60858	11.5475	6.33126	9.57897	9.04468	5.20794	6.96083	12.7793	10.5074	7.38181	6.90793	13.1846	22.3979	11.4571	11.0445	7.4405	9.42271	4.59227	5.04427	5.95806
Cygb	5.26835	8.78735	8.44922	6.54715	5.49313	23.8694	5.36787	7.58309	5.86022	7.64201	6.63412	7.58923	8.8236	4.34945	9.64997	7.47405	9.64294	12.4666	23.4393	10.3375	7.98165	6.42575	4.20846	9.97408	10.0669	6.48555	9.02659	9.54944	7.1561	5.57715
Emp3	9.08374	11.3819	13.742	8.51219	6.67023	7.47846	5.06016	10.0373	11.2556	7.60198	7.03158	7.10095	10.0698	1.89834	4.58287	5.87541	6.0457	11.7742	7.98655	9.53626	7.79636	7.92911	9.43464	22.5709	8.19761	11.1608	6.5756	10.2169	12.3542	12.1389
Dgat1	10.5663	11.3201	6.4855	4.7215	12.1967	7.86149	3.8597	6.7426	12.0398	6.08559	7.37015	10.2696	11.5305	11.2627	5.87126	20.0984	5.50052	11.8055	11.259	10.4987	4.76524	11.1649	6.0278	10.9062	11.8805	12.3963	7.58075	8.49482	4.83912	9.86062
Nup210	11.1504	15.0844	4.15634	7.2846	11.7585	24.514	8.57416	24.3593	7.86528	6.49596	8.02768	10.0255	9.92826	8.6589	5.94908	8.60298	6.24528	8.83962	7.06918	8.79369	5.60616	6.76723	6.19284	4.38961	5.96813	12.7901	12.2451	12.5398	9.53041	6.39287
Ilkap	8.4996	4.70255	8.28056	7.2891	6.87058	6.65167	7.85616	9.07356	8.25972	9.46369	6.38877	8.51386	9.33941	7.80792	8.8458	6.86014	8.97607	5.34218	5.77792	4.91469	7.9674	6.28832	23.062	9.34276	12.5065	12.8489	5.96161	12.6644	18.6867	9.72766
Mvp	14.8993	13.3084	9.33671	7.04178	15.9868	5.90896	5.66039	13.5562	5.08074	5.89541	5.71162	7.12692	10.581	8.24432	3.13883	6.50168	6.0311	4.90891	5.52352	6.87862	8.46625	5.78442	4.69571	4.80485	9.04652	3.97822	5.13471	6.71487	15.7302	10.6871
LOC688815 /// Phb	4.77663	4.57128	4.59406	7.23064	5.48895	12.5746	25.164	4.70301	5.46578	10.6097	5.09826	5.03352	5.77437	8.16795	10.5103	4.8536	19.1253	6.36059	8.11761	4.3773	4.37091	13.7593	7.99646	9.49105	4.05164	6.44029	8.32348	8.55712	7.69311	12.5486
Myh7	14.8993	14.5015	13.5332	8.14347	7.78471	7.04871	8.7755	9.56292	11.2509	10.3645	10.8344	10.2436	10.1382	17.4305	6.13499	9.15921	9.10749	7.69167	7.84779	7.46975	9.34994	6.31747	8.77056	11.0545	11.5804	12.6724	7.96697	10.4839	19.7547	13.4146
Cd59	10.7659	6.05385	7.77858	9.1732	7.17947	5.64271	9.86199	7.62045	5.32491	9.29353	6.09436	6.96069	6.47277	7.23332	6.22146	8.26925	7.31617	10.4298	9.43585	11.168	9.72526	8.00407	21.0226	12.8129	9.62104	11.5273	24.2277	11.4851	8.20599	4.09661
Hmgcs1	6.92834	11.4321	4.63422	18.9445	11.5998	11.1733	9.63406	8.62904	8.07659	13.6275	7.76761	7.7139	7.05705	3.74213	4.61313	6.1803	21.1502	9.34882	11.3862	11.4758	9.94856	5.10145	4.67606	10.4952	8.39054	15.2929	7.99668	9.99443	5.91314	5.96525
Smu1	7.20192	3.98442	8.73836	4.10096	8.23552	9.79066	5.24251	4.71422	6.8698	7.87223	17.6059	4.77379	5.86566	5.87685	12.9704	6.1391	6.4984	6.10599	4.52905	10.2446	8.9461	3.89792	3.82337	11.5291	9.42382	6.7571	5.69423	5.04171	7.92843	8.51665
Stk10	3.34956	9.87998	6.34495	6.05252	9.58375	5.53527	19.2491	21.9574	9.43834	6.80124	9.58316	6.71136	8.54515	4.84404	6.45493	5.44691	6.2112	4.40864	4.6524	8.23187	7.86288	5.16392	7.1752	6.64374	5.27785	4.05969	7.33318	3.86694	5.6024	2.77779
Ugdh	11.3094	8.92635	23.3237	7.02829	12.7143	5.94166	3.10751	7.72504	5.14178	5.80533	7.99333	7.02822	8.61818	6.43326	11.5566	6.25447	6.07491	6.38739	6.02461	8.83766	7.7156	9.96136	8.98668	18.0754	8.00039	13.2336	12.3788	7.94748	13.5399	14.41
Rbp1	6.82482	11.6174	8.47331	5.36902	12.6601	6.81049	7.31672	11.3223	8.62129	6.89133	8.60178	7.72949	4.2178	4.83313	6.32523	9.44351	6.63956	8.28128	7.33514	8.77415	9.73952	19.7603	5.50911	6.56747	7.6874	10.1696	25.2378	7.98753	2.88718	4.82251
Cxcr7	12.5257	11.8066	11.7261	8.24239	7.39652	5.596	9.93037	4.98691	7.1891	9.20845	7.04139	10.1034	8.12976	6.49144	8.48263	5.40159	6.89268	7.18693	5.82417	9.51184	8.11943	24.7202	11.3444	9.13938	10.3156	12.6679	19.3554	5.77594	8.80635	4.39488
Tfam	7.23889	8.40899	6.17227	6.29084	9.9636	6.37607	4.43334	5.28949	6.85571	7.09151	6.25629	6.71655	11.2246	7.74246	9.58944	20.3991	6.85374	12.1405	8.35659	8.52011	5.17857	6.71726	8.6016	5.81751	6.89851	7.38167	5.80811	9.04215	19.7547	9.55517
Nfkbib	6.79894	7.45149	8.44119	6.93386	6.77458	6.73575	5.42865	8.87558	10.8236	5.2348	7.37506	6.91914	10.3482	9.37168	7.39744	6.57584	21.267	4.53818	6.76082	9.99061	6.22854	22.005	8.17721	8.82583	7.51162	6.78425	7.9224	3.6578	5.43345	7.40984
Chst10	6.56233	5.75657	5.91526	6.03453	9.99282	5.03079	14.6866	5.26708	7.00597	7.7371	8.79806	8.71645	11.8044	6.23324	4.82931	7.39576	6.53734	7.71847	10.0911	7.67982	8.25246	6.06344	2.65632	5.63531	6.63269	7.49029	9.73465	4.47658	11.3918	11.7221
Kdr	5.98558	4.2431	5.4695	4.95533	6.49909	5.26902	5.49324	4.37802	5.26387	5.69022	5.2651	8.59178	15.5246	4.12761	6.55437	5.90013	6.40591	10.8541	10.0526	10.6452	4.49918	10.6402	13.3012	11.3681	12.3479	5.23641	7.04104	6.49682	4.92359	7.3775
Slc22a5	7.11689	9.48231	11.2	7.46447	8.12699	9.36559	8.61974	4.43406	6.12788	6.33582	6.57033	7.02822	8.19366	7.22969	6.5241	7.97259	5.55893	9.83569	9.35876	5.89666	5.64417	6.37161	5.11223	23.3251	6.25539	14.1614	4.82276	11.8144	9.21967	23.6633
Pgam2	11.5497	13.7022	14.0472	7.36105	8.80737	8.3286	5.84274	9.73101	10.894	7.22663	10.1916	9.45927	8.39908	8.5898	7.40177	8.10444	8.77162	7.18247	8.13688	6.87373	9.68726	6.14673	22.5787	10.7664	8.99507	14.9172	8.49678	15.5301	19.6853	10.299
Gfra1	7.13168	9.08464	22.4242	5.04526	9.18304	7.05806	4.5663	4.28463	7.91693	6.40088	10.1033	8.21777	7.29898	5.97867	4.80769	6.36571	9.38495	5.45832	4.49822	5.62796	9.44971	7.2628	21.1248	6.9361	6.58124	3.47585	7.39754	5.01056	7.11085	4.08583
Abi1	11.8085	8.75261	4.43343	5.51292	7.62192	5.89495	5.29569	7.11989	7.13745	26.9097	6.49182	9.41771	6.64166	11.5282	8.82419	7.09499	8.56718	26.1883	6.29057	6.90304	6.17628	9.2076	4.82538	3.82184	9.2609	11.3056	6.06064	8.33907	8.03402	6.50427
Scn1b	13.9306	14.5015	12.1638	7.11373	7.9642	6.00706	5.40966	9.26781	10.4385	7.91226	5.79995	7.67754	6.76491	5.21134	7.06454	8.16624	19.9771	4.78831	7.83237	8.90605	6.39958	5.52206	9.91797	6.83864	23.581	14.9172	7.35793	15.4678	8.5288	13.3787
Actn3	14.0748	14.8335	9.38891	7.92763	4.95467	8.16044	4.87781	6.00671	7.19849	7.22663	9.8972	9.16318	7.68242	8.5898	7.38447	9.15921	9.32654	5.44045	8.13688	8.44682	8.13844	6.99628	22.5787	9.27073	8.99507	11.4233	8.50173	13.7012	15.9806	13.3859
Tnni2	11.8713	14.1269	19.332	7.36105	7.30886	10.2438	4.94999	9.59654	12.4154	10.3295	10.1916	9.70342	8.15715	8.5898	7.40177	7.93139	8.89818	7.55767	8.13688	8.88651	9.68726	6.14673	22.5787	10.7664	8.99507	13.1702	8.34823	15.4678	9.76874	14.331
Dpp3 /// LOC100911084 /// LOC678760	9.24271	23.8332	10.1278	7.1542	14.1127	6.84786	5.34888	5.05042	5.339	5.49004	6.94816	7.43859	7.36289	3.50211	4.6996	17.8405	7.85649	4.57838	5.51196	7.6212	5.87697	7.66259	7.49742	6.10563	8.76784	11.0069	6.45676	9.63844	6.15449	7.12595
Lepre1	4.96149	7.95727	7.75449	17.1233	10.1932	6.60963	4.64988	4.93088	5.20752	7.05648	4.12179	5.25688	4.09455	7.24423	9.01442	9.37346	20.2935	5.58785	6.91115	9.89778	5.14532	7.825	7.99646	4.51249	10.6586	10.8485	8.29872	11.2003	3.08026	3.56118
Prdx6	9.75291	4.01531	4.54989	8.88542	4.37864	7.41306	7.76119	4.20992	8.36302	13.0069	6.50163	6.1919	9.40331	4.06943	20.8607	16.9629	6.50813	7.84801	7.05762	4.72416	6.5326	6.4424	5.51697	6.44036	7.05286	6.73447	5.74869	6.17643	5.99459	7.05049
Pfn2	14.8993	8.68311	10.7703	6.86641	10.7567	8.5715	7.40789	4.9122	5.94005	7.06649	8.91582	8.85151	9.47179	5.41499	10.4152	7.55645	6.28422	25.0046	6.06701	7.41112	6.41383	14.13	9.22638	6.10563	8.33052	9.77584	9.13057	8.66836	15.1057	9.85703
Ptp4a2	13.9195	14.5015	11.8787	6.03903	7.65114	5.86692	5.47804	5.20731	5.30613	20.7891	6.09436	6.12437	6.9475	6.42598	6.73163	9.08093	10.4218	10.9122	10.5729	9.96129	5.31635	10.8151	13.2777	7.51234	12.7723	12.3963	5.68928	12.206	8.18487	21.3635
Cand1	12.4703	11.3664	8.98332	6.19191	3.94453	10.0756	25.164	8.54686	11.7768	13.7576	7.41922	8.40997	8.23475	4.05488	7.06454	5.84657	10.4364	5.50745	6.64518	6.40962	4.67972	6.87967	5.6152	7.34709	7.413	4.66163	5.17927	12.206	18.0562	8.11417
Ccl2	8.78058	14.7949	9.90695	7.38353	14.7763	5.09152	4.73345	5.38661	6.04805	6.36084	7.31618	7.15809	11.4255	7.94975	24.1941	7.27216	6.39131	5.49852	7.06147	6.97632	5.52539	10.9192	6.62901	9.58427	7.16433	7.79804	10.7497	12.6377	16.3607	10.1086
Anxa3	10.5108	8.3588	9.65797	6.02554	8.79902	6.0164	11.7235	7.64286	5.62544	6.36084	7.19841	10.1346	9.47179	4.1167	8.92363	5.37274	7.24803	18.1929	8.09448	7.93386	6.64188	8.85778	5.6152	8.5589	5.02061	10.1605	5.97646	6.42562	5.69592	8.84366
Adcy2	12.4703	14.5015	9.4371	7.62185	12.5849	6.97865	14.6866	5.05415	5.90718	6.45092	11.1779	8.92423	7.29898	7.41879	8.28375	7.11147	8.56718	7.80781	5.57363	8.30515	8.75606	6.04262	3.90589	6.33867	5.80092	15.3019	5.51597	15.2987	19.7547	8.8724
Cyp51	10.3629	8.93793	6.93125	4.60909	9.47523	12.2944	21.1942	7.99774	7.01067	8.9332	6.07964	6.18671	10.476	6.74601	5.39136	4.89068	7.51575	18.51	5.43487	6.65389	3.93857	5.10978	7.56815	5.22432	9.04652	7.75279	10.2892	8.01868	3.75605	4.02834
Rabep1	7.19453	3.54428	4.50571	6.33131	6.04411	6.13785	9.50869	5.79005	5.11361	8.3877	7.86084	5.1426	9.70915	10.9645	7.95517	6.00314	8.65966	6.8832	8.26408	10.3472	13.0415	23.4334	8.76663	9.06311	10.2427	11.6858	24.2921	7.92968	6.38076	4.45597
Alas1	8.99131	12.0768	10.3768	7.4195	9.58375	8.91716	25.164	7.54574	5.26387	12.4514	5.21112	8.47231	8.65927	9.86627	11.2194	5.91249	6.0457	11.4705	9.92538	11.124	18.9184	9.20343	4.59354	6.0336	4.78051	10.6674	8.95727	3.7735	9.47309	7.50327
Fen1	4.46608	8.72944	8.24441	7.11373	9.74654	5.38113	7.82957	22.1292	11.9411	7.23164	5.89808	12.0202	6.25366	4.58947	4.65637	9.61655	7.39893	9.74636	17.0716	8.4224	6.48984	3.33156	7.45026	7.09287	12.1764	3.40797	9.26426	7.70274	4.14825	4.79016
Scaf1	3.13143	4.84926	6.04376	7.28011	10.0095	8.09972	7.66242	4.72916	4.04299	5.51506	7.86084	5.11663	7.82392	6.00049	5.57294	7.3216	8.24591	9.97416	23.4393	6.22886	22.6764	7.22116	7.83535	7.02508	5.6723	9.99308	7.15492	12.0102	6.16957	6.96424
Alas2	18.0233	7.85302	6.99149	6.3448	7.28382	5.58198	8.16767	4.51624	6.26405	8.3877	7.21313	7.46976	5.16269	5.91685	20.9299	5.87129	7.45247	3.85924	7.2118	4.51898	5.60616	3.80214	6.26749	8.32162	6.88136	6.58512	6.37258	10.5729	5.39725	7.77997
Slc2a4	8.28147	7.51326	14.2279	17.9687	13.9332	6.31535	9.91897	5.35299	6.66318	8.64794	6.7666	7.98402	9.15226	21.3727	9.52459	9.92557	8.12908	13.418	11.949	11.2315	11.3073	13.1014	7.63495	9.88934	11.6018	8.18727	7.92736	12.1304	3.4966	5.74963
Lphn1	6.48469	7.86847	15.517	6.52916	5.92306	6.84786	7.65482	9.00632	7.10458	5.46502	7.86084	7.89052	6.92924	8.21522	6.15229	5.98666	5.98729	5.35558	3.7543	8.12439	6.98395	13.2846	22.1465	6.48273	9.55673	7.87951	4.58509	7.53809	3.91896	4.63205
Clpb	7.68254	8.08854	4.07603	6.78547	4.94214	8.49676	7.74979	6.32423	8.53677	5.73526	8.60669	5.36597	4.40039	11.2446	6.9651	11.6643	8.6548	5.06078	5.40403	4.42127	8.84158	7.192	7.96109	7.96147	8.75926	4.40818	5.75365	6.03849	3.97025	4.0499
Slpi	6.23329	3.57517	5.32092	6.14695	6.76623	4.9	5.18552	24.3593	9.43834	6.23072	11.5312	9.67225	7.40853	5.64046	5.841	6.39043	6.35724	7.5934	5.49654	3.96204	7.29751	6.68811	5.36372	5.94038	3.93159	8.97024	12.7501	10.4038	12.1702	10.3026
Aldh2	6.16304	11.6019	7.85087	8.71454	8.10612	6.09114	5.15893	9.30517	26.9298	5.95046	6.64884	8.15025	4.31822	10.0845	13.8653	11.9239	6.61522	8.77708	23.4393	10.1665	6.21904	10.9733	11.3522	6.91915	13.7413	4.07327	8.35318	9.40704	7.38237	5.80354
C3	15.8235	6.40519	4.59808	7.17219	3.67739	5.72679	8.23225	9.61521	10.6123	6.8613	9.07284	7.236	7.39027	3.77486	4.61746	9.90909	3.83089	10.997	11.525	6.47313	4.90777	8.24561	5.96886	7.84707	11.7305	5.75688	5.98637	4.93937	8.93004	3.90975
Mrpl23	13.1099	8.20436	13.9629	9.06978	12.8145	7.03937	10.485	6.94432	7.85589	9.20345	8.01296	7.45937	9.39419	21.3254	8.09352	6.59232	8.2167	8.84408	8.87309	10.3277	6.90793	13.6053	13.2502	6.02512	13.7413	8.51765	6.98162	13.4876	13.196	23.1207
Laptm5	9.47563	8.19278	7.02763	9.15522	9.94273	8.17445	8.29684	21.9574	9.43834	4.25891	9.90702	12.2695	9.47635	4.58947	8.15837	5.06785	4.92613	13.3555	11.1665	10.6452	5.49214	6.5132	4.4678	7.75809	7.32297	3.61163	9.03154	7.22215	13.0029	4.08583
Dmbt1 /// LOC100911413	21.0697	13.1231	11.5253	6.39876	14.1001	13.1445	12.468	5.09898	8.10476	13.032	9.33291	9.55277	6.39517	8.81891	9.26518	14.1941	5.5784	10.9122	12.0685	9.22849	9.35469	5.67614	9.749	8.73685	10.1827	10.2556	11.1359	11.3383	9.41275	13.6338
Ptpn6	4.51784	7.687	6.8429	4.88338	4.64161	8.8144	7.77638	21.9574	9.43834	5.19477	9.43595	5.21013	5.74698	4.00033	4.92875	6.10614	5.50052	5.74419	7.89019	6.13604	7.20724	7.46269	4.08271	8.87244	5.03776	5.14137	8.93251	4.28968	13.0029	6.22757
Fdxr	5.956	4.57514	5.79478	7.07326	3.47286	8.85644	21.0916	9.33879	10.9222	13.5074	10.0837	8.54503	5.64655	5.54591	6.71434	6.32451	7.69099	5.04291	2.67118	17.2014	9.1504	7.36691	6.45611	7.47421	5.29929	10.1243	4.49101	6.85281	7.36427	7.80872
Tep1	9.79728	11.7332	6.38109	7.43749	9.85925	5.94166	7.78398	5.04294	6.48475	8.21754	6.21213	7.54768	11.6172	8.44433	9.33435	7.56469	6.71745	11.4884	9.45127	8.79369	6.10501	11.4023	19.4548	6.53781	7.34012	19.3888	8.83348	12.6377	6.61306	9.53721
Ddit4l /// LOC100363484	12.5368	13.0922	6.55778	8.42676	10.1097	8.16044	4.9158	5.35299	6.92145	7.03145	7.17388	9.70342	6.79686	7.46607	5.40433	8.63595	9.59913	6.67773	7.48161	8.70086	8.23821	7.40439	23.062	8.68177	12.2321	12.2379	6.51123	8.61052	11.244	23.7604
Mvd	4.64354	8.82982	7.1722	17.7798	5.79784	6.37607	9.21617	3.23122	4.30125	8.99325	7.11009	7.17886	9.45809	11.31	7.0948	4.3839	7.21395	7.4728	4.61	11.0361	12.1863	7.59596	10.7235	19.927	6.41832	11.1608	7.76396	7.85849	8.32666	3.59711
Ddit4	4.55851	4.27399	7.90307	8.773	6.75788	5.4979	2.95556	14.0904	6.28753	5.54009	6.37405	7.21003	10.2797	8.64435	12.6115	6.88074	9.47744	4.1049	8.38742	6.48779	5.20708	11.5897	24.4491	9.82578	7.34012	5.3224	7.06084	8.37912	5.0684	5.45497
Tbxas1	14.548	14.8142	13.742	5.56238	8.28143	8.39867	5.03357	5.96188	6.57866	7.21162	7.51245	9.11124	4.98923	8.60071	8.96686	8.1374	6.05057	9.70169	5.77406	8.06088	6.5041	8.12068	5.98064	23.4056	9.49242	11.1789	19.3554	11.3694	7.30091	14.331
Gnai1 /// Gnai3	12.5627	11.7641	5.68234	7.10024	8.6571	7.698	5.69458	4.83749	6.38614	7.60198	6.59486	7.21523	6.19432	17.1687	5.93179	5.67764	9.35575	8.14728	7.14627	8.60804	6.98395	6.72142	8.03575	8.54195	9.61247	4.42628	7.19948	12.8913	19.4862	12.9511
Nolc1	9.06525	4.96509	19.3641	7.53192	8.75728	4.80191	6.05547	5.57712	6.25936	5.11469	6.9089	11.2046	8.52232	4.17489	8.37887	6.90546	7.04358	11.2382	7.41994	7.91432	11.1221	23.4334	8.13792	10.33	7.88034	10.2782	9.82378	5.60685	4.44692	10.1948
Chgb	4.03352	4.40912	4.61816	7.1542	4.95049	9.36559	11.9932	2.45423	4.52195	28.3811	7.48792	5.57894	6.22171	6.72055	3.90409	6.32451	6.92676	4.89998	4.35946	6.35588	6.39958	8.17065	7.92966	5.92343	4.00448	14.7769	4.43159	5.91834	2.51308	4.41644
Ptprf	11.5867	12.3471	3.6624	8.30984	12.4639	7.10944	5.31469	6.67163	5.31552	8.11745	7.39469	7.53209	7.47244	5.21861	6.65381	5.72296	6.28909	5.26178	18.2665	5.73544	22.0113	3.36071	3.63082	8.04197	8.27478	7.0558	7.13512	7.80064	11.8383	5.78557
Synj2bp	8.58463	10.9919	7.26858	7.25762	4.94214	8.76769	5.86553	17.5756	5.85553	7.53692	7.86575	6.31657	4.34561	3.34209	6.30361	7.07851	7.47194	8.51355	8.27179	9.66817	9.83454	7.70007	6.35394	9.71986	8.87931	7.12822	4.91189	11.1291	8.84557	23.7604
Snx1	20.8442	11.6174	11.2442	8.93488	6.70779	5.45586	5.2615	5.0803	5.49865	6.17066	7.64003	7.84377	7.5683	3.53847	5.4735	8.28985	7.17014	7.49514	7.08074	6.80045	7.43529	7.21699	5.95707	7.27083	20.6655	7.92929	6.94201	10.7999	7.02939	12.5306
Scg2	5.88576	2.28178	4.45351	6.26836	4.2075	7.84748	21.0916	9.27902	10.8048	10.2144	9.19552	6.36332	5.70133	6.02595	5.70697	9.17157	9.4239	5.49405	5.48883	6.15558	4.91727	17.1534	6.45611	7.37252	4.14168	5.82477	8.05114	4.16954	4.16031	3.70492
Slc31a1	3.83388	7.43991	7.2485	9.43851	3.68574	11.3415	9.63406	9.6974	9.35851	28.8014	6.73226	6.58149	7.93348	3.80759	5.75885	7.7295	9.20972	15.9327	5.56592	8.8572	9.73002	8.80365	5.26155	9.77494	8.17188	6.62585	5.13966	7.97418	3.29145	8.67476
Serpina3c	15.8235	3.33966	4.22461	7.07326	5.21764	6.48818	5.04876	4.00447	5.49396	7.03145	19.6227	5.83867	6.04825	6.06959	4.34076	8.33517	4.70708	9.25055	11.101	8.16836	7.17399	5.92601	5.19868	4.13115	4.01305	6.61227	5.98637	9.1979	3.57202	3.01496
Tcp1	5.73788	7.77194	9.95112	6.17842	9.4794	6.93194	3.01254	9.15948	8.34894	6.55602	7.60568	8.89307	11.8363	6.32416	9.39056	6.4646	7.51088	9.22375	7.28889	9.58512	22.0256	7.58763	11.3444	8.87244	9.3295	8.50408	9.2296	5.29536	8.68568	5.92931
Ccnl1 /// LOC100909712	11.4203	9.15028	8.60584	6.13795	11.5331	6.8245	7.50666	8.74484	10.6874	9.3686	7.77742	8.34764	6.06651	19.2416	6.25605	6.29567	9.36062	10.9926	7.89405	7.43067	6.48984	6.54651	8.6959	7.17761	6.07532	4.57111	6.86773	8.08543	16.7559	11.2046
Hsd17b12	3.69709	6.43608	3.63027	20.6037	6.19855	13.0371	11.1878	8.14716	9.89852	13.6275	21.1831	7.44379	8.04303	4.67675	5.87991	5.61584	9.29733	8.94682	8.47608	7.56257	5.34011	6.18837	4.4678	8.13943	7.86747	6.08727	4.72868	3.78685	2.93243	4.68595
Tspan8	5.05022	4.65236	4.17642	8.05803	6.65353	5.39981	21.0916	9.49568	13.3827	11.6006	6.74698	10.867	7.4907	6.71692	2.28279	5.40983	7.61797	12.3147	10.862	6.76137	5.27359	6.48405	7.19092	8.00384	3.48141	9.40925	7.70949	8.77516	5.58429	12.2827
Pard3	9.32775	7.47852	8.80662	8.35031	5.1759	7.343	7.94734	5.35299	21.0555	6.23072	6.42312	6.90875	10.0789	3.88759	6.58031	6.37395	6.08951	6.51693	4.65625	9.09169	8.24296	5.97599	7.54457	6.35985	8.44199	10.6584	7.53124	11.405	7.83792	6.69832
Tsc2	8.66597	5.55966	3.93949	5.82768	6.94572	15.6576	4.78664	8.62904	6.4284	6.30579	7.13953	9.76575	4.78382	8.45524	7.7217	20.3991	5.12084	14.1729	8.86153	5.85269	5.23083	5.25554	6.37752	6.05902	7.48589	3.39892	10.928	6.50127	2.79667	6.75941
Safb	4.21098	5.67163	5.82289	7.89165	8.36491	6.09581	4.5739	4.75157	7.21258	6.66111	6.83039	7.55287	11.8089	12.5174	25.3658	5.31506	8.50877	6.02559	4.0164	10.1372	8.2192	8.67871	5.41873	6.25816	4.84482	7.39977	7.50648	5.87384	6.10019	21.3635
Crym	8.76949	13.5092	11.2	8.04454	16.1872	9.31888	9.96076	11.0571	13.2982	10.6848	9.66658	11.2826	8.6684	20.889	6.16526	9.03149	8.99554	10.9836	7.85165	8.84254	5.58241	13.9592	11.4269	10.2283	14.0114	14.1614	8.49678	15.2408	9.21967	23.6633
Hrsp12	3.85236	11.1077	7.86291	7.24863	15.4776	9.25815	25.164	8.18451	8.76216	13.2372	7.07083	10.1242	7.38115	7.32424	4.43155	7.79542	6.92676	9.83122	9.77505	5.79406	9.83454	7.88747	7.37167	7.37675	7.48589	11.1608	5.23374	10.8132	17.3472	6.89237
Ap3m1	10.0043	4.07322	4.32099	7.19017	9.50862	6.48351	12.2287	5.48	6.12788	5.97048	8.7539	4.46731	10.2752	5.31317	4.05541	6.07318	6.34263	8.12941	22.3947	8.09508	8.12418	5.74694	8.03575	7.36828	7.67025	7.71658	8.0858	10.2792	6.02476	4.2727
Ythdc1	4.11486	9.87998	12.2401	8.08951	13.4865	7.95491	6.97481	4.88232	5.17935	6.56102	22.9446	6.0932	7.96999	6.8842	8.08055	18.9859	4.09862	5.07865	6.23661	5.52537	6.23804	10.078	8.40905	6.02512	5.86523	9.06528	5.52093	8.55267	9.06581	2.98262
Ddc	12.5627	14.3972	7.1722	7.07326	12.1091	9.25815	25.164	4.61336	6.63971	13.1321	10.4517	7.82299	5.62829	5.69501	4.6434	7.00847	10.1394	7.49514	5.43487	8.86697	8.94135	20.4974	10.0948	8.85126	9.52672	10.4773	8.85824	13.7457	10.1368	11.7293
Gipc1	4.59178	7.11173	3.88327	8.57065	11.9421	5.43251	5.94151	11.5988	9.06738	7.46685	7.56643	3.59982	5.54157	15.0449	7.08183	7.29276	6.19173	5.32432	5.19589	8.10485	3.59649	6.07593	3.23788	6.21579	9.80969	9.04718	8.42251	4.41873	3.80734	5.1567
Zfp148	8.76949	13.7563	10.18	6.98782	11.8378	8.94052	4.37635	5.18863	6.55518	8.63292	6.35443	9.55797	9.32115	15.9431	8.55613	9.30754	6.98517	8.10708	4.46738	9.30177	6.54211	4.78495	4.86075	9.72409	7.41729	13.4327	7.78871	13.5499	15.881	12.3078
Sharpin	5.73048	6.67932	4.64627	5.99856	10.0554	6.14719	7.40029	5.47253	4.52195	9.0383	6.23175	7.85416	12.6443	22.0673	8.2362	5.03901	6.06517	8.65201	7.26191	11.4758	5.13106	5.30551	9.25389	6.65645	10.873	10.5769	9.69999	5.07286	14.1463	6.91393
Irf1	7.78976	12.3162	10.1198	5.85017	10.1264	8.67893	7.76119	20.9525	10.7531	6.20069	6.56542	8.05674	5.83371	6.38962	6.90025	7.33808	6.22581	7.99541	5.70083	8.3198	7.5018	8.48298	8.05147	9.17327	3.15128	4.66615	4.59499	8.03203	16.7559	8.25791
Lipa	8.86191	14.9261	12.8304	7.63085	8.38161	11.9627	21.4525	11.3746	8.76685	8.30262	7.3309	8.79956	10.6267	8.94256	6.49816	6.32451	6.64443	10.9345	8.78058	10.5329	8.08617	8.11235	7.44633	8.50805	8.14616	15.0485	8.7394	12.6332	16.7559	11.2369
Vhl	14.6405	12.4397	14.3203	6.24587	7.78471	9.25815	25.164	6.95926	5.73344	13.5875	6.28573	9.77614	8.72774	7.98975	8.61666	7.33808	8.07067	9.93396	9.32793	9.63886	7.56832	5.35132	5.7881	8.48263	9.16657	9.77132	8.82853	13.185	13.2653	22.2331
Esm1	5.4606	5.49403	5.60203	6.39876	5.86462	4.64309	4.08764	3.85879	6.40492	6.09059	8.27302	8.51386	3.91196	7.8261	22.4301	4.23557	6.96083	6.90106	3.86222	4.4457	7.33077	4.77246	3.12392	9.28767	8.63064	6.3543	4.2781	10.5062	12.4689	2.86763
Pdk1	5.88576	9.52478	6.48148	20.0417	7.91411	6.77779	6.72788	5.84608	6.55518	4.33398	6.60468	7.7191	7.29442	7.98611	11.0075	5.65704	7.16041	7.50854	7.11543	9.63886	7.97215	23.4334	11.8277	10.1266	11.872	10.8168	8.54134	12.8512	6.16354	7.17986
LOC683573 /// Rgcc	13.3982	21.451	12.8987	6.12896	13.9791	10.8697	8.73371	11.737	11.481	5.8804	5.85883	10.1294	7.94717	4.45491	9.74941	5.79301	6.19173	9.76869	7.87477	7.00564	9.95806	8.97855	14.7001	7.55047	8.62635	14.0528	12.3094	8.79741	9.87735	14.4531
Slc4a2	6.56602	9.85296	6.57385	8.73703	4.90875	6.0491	3.68495	4.40417	6.69136	6.50097	7.00214	8.197	11.3296	12.9392	13.0525	16.007	6.73205	6.49013	5.83959	9.35551	21.3462	7.7667	7.7214	9.82155	5.30358	10.758	5.54568	11.1514	5.97046	13.3859
Ccnh	11.1097	7.54415	3.42948	5.79621	6.14429	5.55396	7.18755	8.05003	11.0443	9.66387	7.78724	11.8747	20.3312	4.10579	3.6663	5.92897	8.22157	9.22375	17.9505	5.19805	6.06701	3.84795	5.83918	7.78351	5.21783	10.7896	6.72414	6.61697	7.21946	8.32978
Dnase1	7.46072	1.8455	5.34903	5.51292	4.19915	6.2266	4.85122	8.06498	6.8604	5.59514	6.88437	5.95295	5.36811	4.64766	13.1779	7.42873	8.73755	26.4965	6.49486	4.99286	6.62762	4.14363	3.46186	5.25821	5.83951	8.03339	9.96242	4.34753	5.84978	4.53862
Prx	7.78606	10.8645	8.43717	17.9687	14.7638	5.71278	4.63848	4.43406	3.76125	5.48503	6.69791	7.6204	19.7835	5.82593	5.01522	8.99852	7.4184	7.5398	6.62977	7.86058	7.26425	4.80577	6.92764	6.148	7.17291	5.08253	7.89765	7.14206	7.75948	8.25432
Fah	4.48087	9.30471	13.228	17.3257	14.0542	8.59953	7.62063	6.10009	5.17465	6.18067	6.71263	5.74517	11.5305	4.00397	9.41218	8.02616	6.70771	12.1986	10.438	8.10485	6.28555	7.7667	7.54064	8.40636	11.6576	9.16033	6.23394	9.35809	7.04146	23.6633
Rab7l1	9.28338	8.03834	11.1599	8.41327	12.5307	7.698	5.31089	18.9801	8.79503	7.92227	7.15425	8.45672	7.78741	9.06984	4.64772	8.19508	7.98792	6.41419	8.86153	4.59714	6.46134	7.35025	6.91979	10.3427	10.2299	4.37197	10.5764	5.74034	9.31621	21.9097
LOC688682 /// Snrpn /// Snurf	13.9306	14.8335	14.6295	7.02829	8.7698	9.28618	7.84856	5.14007	6.66318	7.78214	7.06102	10.3475	6.3906	7.22241	7.42338	7.16915	5.74877	7.87481	6.32911	7.70425	6.62762	9.28256	11.0772	21.6176	6.49978	12.8534	7.26881	15.1296	19.0789	10.5829
Pcyt2	9.63091	6.83761	6.73046	18.9445	10.6482	5.69409	9.00344	4.57227	5.7757	6.59105	7.0463	6.60227	7.72806	8.08067	11.1934	5.02665	7.33565	9.66149	9.31251	9.40924	6.68463	13.3221	11.7059	23.0963	14.393	5.14589	10.4774	7.28445	10.1308	8.57774
Hsd11b2	7.53096	7.27775	7.94725	6.53816	11.1908	9.25815	25.164	9.64883	10.7343	12.8918	9.95608	5.75036	9.12487	6.00413	4.85525	7.66358	8.94199	5.67272	4.27851	10.7381	9.94856	10.8359	19.3998	8.97837	3.78582	13.3422	6.64492	7.53364	6.79407	9.10239
Abcg1	10.1744	11.3819	11.2844	7.84219	14.5593	11.7619	5.59581	8.83823	10.7954	6.8663	9.72055	7.18925	10.686	9.12075	10.3158	5.21206	7.75427	28.7924	10.7194	11.9936	8.53752	12.0561	9.48573	12.1943	13.8485	11.722	9.52174	8.29457	5.51189	10.1122
Atp2a1	13.9306	11.3162	19.332	7.36105	7.30886	6.44147	5.52743	9.23046	9.98304	8.6029	10.1916	9.31902	7.27159	8.5898	7.40177	8.10444	8.78136	6.7626	7.58183	6.88839	9.31193	5.49707	22.5787	10.7664	8.99507	13.0797	8.34823	15.4678	9.54851	14.216
St3gal5	14.6405	25.9721	12.7702	7.71628	10.932	14.0367	12.2933	5.38661	7.65398	13.032	9.30837	9.4333	9.0564	11.0809	10.8087	4.80004	7.9149	9.08975	7.9827	11.1387	7.86763	11.0025	8.00432	11.3893	22.7921	11.6722	9.8931	7.84959	11.7026	9.64501
Fgf13	11.4758	13.2891	14.6295	6.83943	12.9189	7.23556	5.48564	4.81508	5.8837	7.87223	10.9129	8.90345	8.14802	15.7831	7.56606	4.96896	8.31406	7.51747	4.57531	8.30515	7.79636	7.8958	9.83545	12.5629	12.8109	11.8804	9.03154	10.4127	19.0789	7.56796
Bcl10	8.28517	6.49013	22.2394	6.29084	6.10672	8.02498	7.61303	5.22598	20.0083	5.68522	4.269	6.6646	7.15747	9.34623	9.71914	6.51404	7.54009	6.49906	6.56424	5.76475	6.98395	5.95516	6.96301	6.80475	4.28745	4.33577	4.73364	7.56034	12.8792	11.8766
Rnf103	6.03364	5.81062	9.21222	18.5353	10.0346	6.95529	8.46019	4.50503	10.1145	9.34358	6.99232	6.53994	13.434	13.6957	11.9976	6.81482	8.03173	4.1183	6.16337	6.47802	7.41629	12.5641	12.0595	19.1346	7.19434	13.1702	9.53164	13.1004	6.71563	3.59352
Igf1r	7.78237	4.47862	6.50156	7.73427	10.4353	7.22155	14.075	4.98318	8.24563	6.09059	8.07184	7.66715	23.3987	8.20795	3.94732	6.29979	6.92676	4.57838	4.43269	10.8113	9.21216	5.64283	7.77248	6.16071	7.51162	7.76636	5.25354	12.8112	4.39865	7.42781
Dusp5	6.64736	9.72941	15.2078	7.78823	11.7835	5.78284	4.13322	9.85802	9.30216	6.39587	8.60178	5.83867	5.15813	4.70948	19.7625	10.3376	5.5638	12.6587	12.7392	6.47313	9.24541	3.09419	5.03757	5.53786	5.76234	3.82435	6.92715	10.3282	16.3607	4.70033
Aacs	4.81361	6.77198	7.377	17.9822	11.2492	6.0164	7.76499	5.4277	8.15172	10.0042	6.80586	5.11143	5.08509	10.099	9.59809	5.6488	6.85861	7.4192	7.2118	11.1045	20.9091	7.7667	6.36573	9.97408	6.92423	8.09222	8.82853	7.44465	6.2269	4.43441
Neu2	13.9195	13.1772	10.417	6.83943	13.4156	8.35663	10.4128	5.68545	10.1098	10.8049	11.2417	9.40213	6.97945	5.78957	9.08359	11.0792	8.2167	8.08474	8.11761	7.16197	9.33093	7.02959	11.5133	10.1139	23.581	13.1612	8.37794	14.4399	8.80937	23.6633
Pla2g2a	13.3982	10.7564	21.1833	7.80622	12.5933	11.3415	13.4444	6.76875	8.0625	10.9801	9.49484	8.6697	7.70981	6.97148	10.7179	7.27216	7.27237	6.74026	10.2723	11.3048	9.52572	8.89526	9.69792	12.135	17.7415	8.07412	10.616	11.8189	11.6875	6.98221
Tob1	12.6995	7.06154	6.83889	6.13346	9.09538	6.23127	7.90935	8.31899	8.16581	9.59881	8.83241	6.84641	19.8519	8.06248	10.3158	5.20382	8.27025	8.17854	4.50978	10.8846	7.72035	7.78752	3.96483	9.47411	5.23498	3.67047	7.04599	4.86372	8.11548	20.0518
Mpdz	13.4796	5.34345	11.943	8.34582	7.04172	5.22698	7.3851	19.1221	6.29223	6.52099	6.83039	9.23071	8.73687	8.94256	6.23011	6.58408	7.4184	4.07364	6.22504	10.6892	9.9153	24.666	11.8866	10.7537	11.4904	6.26831	5.53083	10.8533	5.01108	8.98021
Tmpo	9.06525	7.04224	10.5495	5.23412	10.0012	6.06311	6.28341	3.11915	7.6305	5.2298	6.18759	8.51906	5.0714	10.6845	9.32571	16.7033	6.69311	10.2064	9.54378	11.4074	6.59912	11.0191	5.54447	6.20308	8.22762	9.06981	9.4029	12.1704	3.55693	16.2212
Mapt	14.0748	14.8335	9.38891	16.6467	6.77875	5.31106	5.53882	4.68433	3.82229	6.71616	8.97961	6.96069	7.3355	4.95677	8.4956	7.24744	10.0129	5.84692	5.61603	9.87824	7.9769	8.60792	6.22427	6.89796	5.77949	10.0881	7.42725	13.7012	15.9806	11.7472
Alpl	5.22028	6.91483	5.7988	7.54091	6.68692	8.749	6.24542	8.30405	9.00164	7.15156	6.24647	5.61531	8.19366	6.46599	5.00657	14.8904	7.98792	8.00881	10.0333	5.97971	5.47788	5.35548	21.447	6.84712	5.86523	8.96119	5.2882	7.32005	2.51308	4.28348
Cnbp	14.0748	9.55953	11.8586	5.45446	8.28143	8.7163	8.00052	9.49941	10.2413	7.72709	6.57524	9.52161	10.581	18.3251	10.787	6.63353	5.77798	8.51801	3.8391	6.62458	6.19528	9.13264	9.91404	8.02079	10.9759	9.99308	6.00122	9.62509	9.54851	23.0381
Anxa7	11.0728	6.81831	6.67022	18.7871	5.60583	4.08723	4.18641	4.50503	6.94962	4.95455	9.56353	5.64128	7.58199	3.80031	3.55821	8.45054	6.3475	9.81336	11.1781	8.07554	10.5424	4.9432	8.19293	19.9355	3.57145	4.86529	5.99132	7.87184	4.09696	3.52884
Rgs2	3.07967	4.30488	4.2728	6.45272	3.60643	14.0367	21.7868	5.55097	7.07641	11.1352	8.14544	3.21023	4.01239	6.28415	4.13755	4.75059	7.58877	4.54711	4.88367	8.67644	6.39958	4.8266	9.81973	6.34714	6.55551	13.3694	6.38744	5.27756	8.32968	7.30563
Pcp4	6.57342	2.23159	11.4852	6.2144	8.05603	5.10553	4.44853	5.07656	6.50823	6.78122	7.62531	6.04645	20.4636	10.7136	5.17518	4.72999	6.57628	4.18977	7.97885	7.83127	5.81045	5.96766	5.65057	9.3597	8.75498	4.10495	7.17473	8.13438	6.84536	6.89956
Slc27a2	15.8235	8.24297	10.4892	5.396	4.3202	6.39943	7.28632	8.63651	8.81381	7.43182	19.4362	9.34499	5.36354	7.10968	5.48647	5.7312	4.70708	5.20371	4.36331	6.50244	6.89368	8.25394	7.50528	11.0418	12.7509	4.75667	7.64017	7.46245	3.3729	3.15871
Matr3	11.6347	6.59438	23.388	6.73601	8.50266	8.24452	9.39472	5.06536	8.02024	14.2181	7.76761	9.16838	7.49526	9.41532	12.6894	6.79009	9.9058	9.91163	11.5289	8.09019	7.52081	13.5553	13.2502	24.1344	10.1398	8.83899	7.51638	11.3071	11.2319	8.49868
Gucy1a3	6.20001	23.9374	4.56595	6.39876	6.03159	6.42279	7.30532	10.4744	10.0582	12.001	6.63412	5.94256	7.97456	8.38615	4.52666	8.43406	7.47194	7.37454	6.93813	9.80496	8.15744	23.525	8.90417	7.61403	7.49447	6.8974	9.8733	8.94871	11.7358	7.10439
Scfd1	6.62887	10.6367	12.9911	5.41399	7.52174	8.66492	8.22466	4.53865	6.94023	6.37585	5.22093	4.75821	5.25399	17.2814	8.63828	20.7329	9.4531	5.61912	5.19203	5.65727	5.50639	10.6735	8.83736	10.33	5.81378	8.25516	6.19928	10.3326	6.9057	7.00377
Abcb6	11.0136	5.32029	3.63027	7.73427	10.164	8.88913	4.71066	5.4165	4.41395	9.49872	6.15324	8.86709	5.88848	7.39334	5.37839	6.78597	5.92888	6.32933	5.04556	5.97482	10.2194	10.8609	14.2482	8.35975	26.9338	5.13232	9.28407	10.4261	19.0789	7.70451
Ahsg	15.8235	3.67941	4.54587	7.08225	4.29098	2.94747	5.54642	4.22113	6.36266	5.58012	7.31127	5.59972	4.92076	3.94214	5.4173	9.90909	3.83089	11.8904	9.74807	7.03495	7.19774	15.2835	6.18498	3.81337	4.04307	4.32219	5.98637	4.48993	6.02778	7.64701
Cst6	3.56769	4.49406	10.1921	18.0721	10.8068	7.09076	5.47804	4.67313	6.39553	7.70207	6.21213	21.7184	10.4988	8.46979	6.66678	6.88074	5.46644	9.29969	9.75578	5.51071	8.31422	9.11182	7.3481	6.50391	10.1398	6.18684	7.28366	8.00088	11.2923	12.9978
Blvra	13.8936	11.3162	14.2641	6.2099	13.3488	9.50105	7.89415	7.72878	6.78997	7.01144	10.2407	9.03851	26.1558	9.6517	14.2545	7.13207	6.78073	5.84692	6.3137	8.15859	8.65154	13.6386	10.0516	12.6858	15.3105	9.49524	7.78871	14.4399	9.31621	22.2331
Ctse	4.13334	3.94968	18.7497	6.87091	5.25103	9.22078	8.24365	24.3593	9.43834	7.49188	11.5312	6.48799	7.1027	6.26961	7.54444	6.78597	7.05332	7.49514	4.77574	8.49568	7.41154	3.38986	5.014	8.61822	4.96058	6.58964	12.7501	3.77795	4.70336	3.51087
Lox	7.77867	11.7139	12.1076	7.09125	10.5897	7.80544	19.9975	4.38549	6.53171	12.1261	7.24748	8.22297	5.56895	7.36424	9.52459	7.45345	8.52824	8.45995	5.5081	12.0669	20.738	6.94214	3.98055	11.1944	11.8162	10.4321	6.78356	8.25897	2.33509	6.69832
Egln3	11.5497	21.451	13.5613	7.11823	12.5307	6.01173	20.499	5.16622	5.97292	10.1143	7.31618	6.6698	8.05672	9.25895	9.84452	7.3422	8.03173	5.95412	4.99545	6.37054	8.15269	8.26643	6.64079	3.41085	6.34114	9.63554	5.43675	6.33218	13.5399	9.84265
Zhx1	11.6976	18.3546	4.08004	9.43851	5.84793	9.31888	7.15336	10.8106	10.3634	10.89	6.07473	9.76575	8.50863	11.9755	11.0162	7.3422	10.0567	8.08474	7.13856	11.1924	5.02654	8.44134	8.77056	10.5588	23.581	5.91529	9.29397	11.6587	11.8926	13.3931
Acsl3	12.8843	3.19681	9.3849	18.7871	3.57304	5.40448	6.6557	9.35373	12.6925	6.37585	9.97081	6.31657	6.45451	8.02248	7.42771	11.4706	5.35449	6.27572	5.08411	5.98459	22.7382	5.88853	6.72724	6.69882	8.27907	4.21357	6.90239	10.8622	6.62513	7.19064
Acsl6	13.9195	12.2235	7.85087	8.72803	14.3548	9.43566	6.6785	9.8132	11.6312	9.23848	8.12091	7.21003	5.87022	6.50235	7.445	8.84608	8.8203	7.41027	8.13688	8.20256	6.69889	9.03686	14.2718	10.5673	23.581	15.2521	8.38785	14.293	18.6867	9.72766
Psmd9	4.5622	8.33949	7.25251	18.6252	3.2892	10.2671	13.262	4.55359	10.0816	8.25257	6.41822	6.04126	10.2843	10.3063	11.8895	6.94254	8.16316	5.48958	5.42716	6.93724	5.82471	5.70113	7.50921	5.30906	5.73232	3.67047	9.76436	6.73267	4.2116	17.2237
Syk	10.0228	9.47845	9.46923	5.76023	9.94273	7.08141	5.22351	12.189	5.74753	6.96139	6.78133	10.1969	7.99282	9.56079	7.41906	5.00605	7.95385	8.12048	4.02411	9.66817	6.55636	6.85885	9.81973	8.02079	6.71415	3.54374	7.52628	6.10523	13.0029	8.42321
Gpnmb	14.1746	11.8915	23.388	7.45997	14.6219	13.0558	11.3892	10.6761	10.2413	14.8036	7.27201	7.9996	12.2608	6.46599	9.9137	4.1408	6.97057	11.1891	9.44742	8.51033	6.70839	10.9941	9.51716	8.98684	20.2539	7.77994	8.40765	14.3331	7.81982	10.2559
Dhcr7	5.94122	5.3975	8.65804	9.42052	4.39951	7.44109	7.76119	4.47888	6.59275	28.8014	6.67337	5.39194	7.73719	5.58228	4.58719	7.56469	7.21395	5.44938	2.53242	8.30515	16.1011	5.30134	4.33813	9.83426	8.38626	3.92391	5.54073	6.85281	2.77254	4.57815
Ren	16.8291	3.43232	11.9992	6.51567	4.16576	2.77464	5.46664	8.77099	8.66824	5.19977	3.08153	7.80221	4.18584	3.4621	5.94044	6.06906	8.00252	5.55658	4.26695	5.0808	5.98624	5.50957	6.75475	7.84283	4.25744	3.53469	4.85742	6.49682	3.70778	7.24813
Cxcr3	7.17235	6.56735	3.89933	17.6359	10.0012	6.14252	5.2615	24.3593	9.43834	7.45684	10.643	7.97363	9.3531	5.69138	9.40785	5.90425	5.99216	7.30753	5.25756	6.47313	8.9461	11.0774	4.58175	5.11839	6.12677	3.77909	11.9826	6.91956	7.73233	6.84206
Agpat4	4.1925	2.90338	8.00347	7.54541	13.3488	12.3224	25.164	4.42285	4.10403	10.6097	5.22584	8.35803	4.74274	14.7321	8.95821	5.87129	5.262	8.90215	8.05208	6.4829	7.67284	12.1019	3.04926	5.91072	7.02713	3.54374	5.81306	8.48592	10.8005	11.1363
Hspbap1	21.6612	14.7331	14.9227	6.41225	15.4776	5.89495	7.23314	12.6821	7.09519	9.59381	7.81177	8.7684	9.7411	6.46235	9.61106	8.56178	8.77162	7.05293	6.53726	5.77452	4.57045	6.47155	9.32069	5.42346	5.08921	14.4465	6.01112	10.8622	6.79709	8.13214
Oprk1	9.49042	23.6633	11.6217	5.62084	5.61418	6.88055	7.74599	5.70039	6.48944	7.46185	6.52126	8.01519	6.65536	7.93156	6.80513	6.83542	6.12845	6.89213	4.32477	5.04171	5.59191	18.4485	7.38346	7.67759	4.27888	5.66637	4.49596	8.76181	4.94471	3.48212
Cx3cl1	3.23125	3.51726	7.5296	7.66682	7.69706	6.61897	5.16273	4.44153	5.75222	6.52099	8.57234	10.0878	6.05281	8.8771	8.43507	20.3991	7.71533	9.24609	12.2458	7.96317	8.471	4.79328	5.38729	5.165	9.16657	11.1789	8.75921	9.1979	18.373	9.72766
Npr1	10.8546	10.1734	7.38905	5.46345	18.2116	6.57226	5.40586	5.6481	6.26875	6.19068	9.48502	8.12947	9.07922	7.08422	9.61538	20.3991	7.93437	12.6587	8.95789	9.56558	8.12418	6.45906	8.41298	8.47839	8.05183	10.2873	9.56135	11.4139	11.2078	4.67517
Dab2	13.0951	9.99195	7.19228	5.20265	14.1001	8.16511	4.13322	5.85729	7.01536	6.57604	8.77352	6.58669	8.42647	22.0673	14.9289	8.4423	9.73543	6.642	7.05376	5.70124	4.74148	8.89943	5.60342	6.33443	10.1398	5.33598	4.41179	6.44342	16.7559	9.85703
Fxyd5	4.90973	6.7797	5.23659	5.69728	5.40547	5.18027	8.84008	24.3593	8.20807	8.08742	7.79214	6.58669	7.0251	3.65121	6.73595	6.38631	5.90941	8.57608	9.33564	5.02706	6.42333	4.43514	3.70548	5.79209	5.42791	5.14137	10.7992	6.89286	12.0887	4.07505
Por	9.86382	13.7216	10.5696	7.38353	4.63326	4.68046	4.2168	12.9846	6.77119	5.16975	7.97861	7.46456	10.3619	3.74576	6.99536	20.3991	6.73692	11.8055	8.31804	9.52161	5.15007	8.71619	6.0278	6.02936	6.91995	10.3552	8.81863	8.23673	11.5367	4.35535
Smad2	6.08171	13.5864	7.97937	7.9681	7.44244	8.749	12.0616	4.7964	5.70996	9.3736	6.66356	10.6228	9.51743	16.6486	7.12507	5.51695	6.96083	7.24947	7.19638	8.9891	6.63712	6.19254	4.46387	5.51668	7.50733	7.63059	6.05074	25.3688	11.3707	14.331
Tpp1	4.12225	8.98812	4.80288	7.68481	8.38161	6.17989	4.68407	8.80834	8.78564	4.87948	7.83631	9.54238	24.8686	5.67683	7.31097	9.05621	7.54496	7.446	7.81696	9.51672	6.42808	4.80994	6.17319	7.64793	4.21457	8.27778	9.74951	4.32973	19.7547	11.9844
Rab28	10.7918	13.8297	4.20051	8.56166	8.37326	4.85329	6.46196	17.9155	6.76649	5.04463	6.79605	9.96834	8.06585	22.0673	12.43	5.08433	7.38432	4.14511	5.19974	6.84442	6.41383	5.47209	11.6351	11.7833	12.5279	12.4732	5.53083	15.2987	7.40349	3.87382
Ralbp1	7.29065	5.39364	3.14838	19.0029	12.5849	7.80544	8.11829	9.56665	12.3356	8.36268	8.29265	11.428	9.54482	6.12778	6.6884	4.80004	19.4611	8.73688	8.29877	7.76287	11.7539	7.47519	7.29701	11.0757	8.17617	12.2017	7.66493	15.2898	8.00084	10.4104
Gtf2b	13.9306	9.55953	11.9911	8.11649	11.3786	5.1756	19.9899	4.91967	5.663	6.24073	6.87456	8.12427	7.97456	7.1715	7.24612	6.76125	6.60062	12.0824	8.62255	7.94852	11.5639	10.8234	12.4171	7.50386	7.24579	6.69374	6.13491	13.8836	16.6714	12.7426
Nr3c1	13.4796	6.71792	11.5534	6.98782	11.1783	6.49285	19.9975	7.32534	6.25936	4.8995	7.16897	8.7684	8.31691	7.08422	10.3677	6.9755	8.32379	8.21874	7.73987	10.6501	7.77736	8.60792	18.7318	11.1901	10.8044	6.04201	8.2294	8.03648	3.68968	6.74504
Adamts1	5.61218	12.5401	11.9952	7.26212	12.251	7.12345	6.35939	10.0261	10.7719	8.1725	7.31127	7.64637	7.50439	18.7906	12.5294	7.93139	9.65268	11.6983	12.2651	10.5329	6.12402	14.384	12.2285	10.6605	7.45588	24.3355	6.28841	13.5098	9.29811	4.16489
Serpina3n	7.59751	19.37	12.1558	5.16667	11.8378	12.9063	9.91897	10.198	13.2982	10.0192	10.7117	11.4072	9.40788	7.38606	9.61538	7.26804	7.29184	12.7793	8.32961	13.3371	13.146	10.4111	11.1833	17.9864	10.6329	11.4549	9.86339	9.16675	9.53041	10.1948
Dnph1	6.8507	19.9916	6.01164	8.9034	4.6917	5.89495	9.00344	9.89911	11.279	10.4746	8.7539	9.77614	11.1242	12.1792	11.7166	6.83542	7.01438	17.5408	7.29274	8.8572	8.09093	4.80577	8.13399	8.70719	9.46241	12.4778	7.2391	9.76748	8.89988	11.8622
Slc28a2	13.9195	10.046	6.67826	5.98507	13.6118	7.6326	6.39358	4.49382	5.81326	7.00143	5.81467	9.15279	7.43136	5.58592	5.95341	6.5882	6.36697	17.4604	6.02075	7.79707	7.79636	6.93381	7.91787	8.27078	3.36565	15.0485	6.74395	15.2898	19.4862	13.9033
Zranb2	4.57699	9.40123	10.7141	7.22165	9.67141	5.7081	4.88541	5.23346	6.54579	5.83035	23.028	8.58139	6.72839	7.69154	4.6996	15.7474	8.06094	6.09706	5.85115	8.45171	11.4499	12.5641	6.24392	8.32586	5.94241	6.23662	7.07075	2.94582	5.8347	3.23058
Ndufaf3	13.5905	8.29702	8.19622	6.11997	14.0793	7.65596	7.62443	9.12586	9.08147	12.3413	7.63512	8.78398	10.718	6.75328	10.6746	7.404	8.73268	8.57608	15.6031	7.14243	5.65367	7.15869	8.87666	11.6308	4.35605	13.1567	8.04124	5.15741	16.2611	9.05567
Gtf2f2	21.0697	8.33949	10.5856	7.9591	7.90994	10.6969	10.2799	7.45982	9.42425	6.80124	9.59788	9.40213	11.6172	10.7136	5.65509	9.61655	7.91004	10.5593	6.93427	10.6208	7.7156	12.7807	9.02991	23.0667	9.69822	10.0248	8.65523	11.4851	10.882	7.20501
Prep	4.45499	3.66011	7.27259	8.16595	8.64458	6.52555	3.30886	4.87858	5.53622	8.15749	6.75188	6.26982	7.31267	17.1687	4.83363	17.96	6.83914	8.57161	10.9468	7.42089	5.87697	3.6314	5.15939	4.73705	4.37749	4.00538	6.26365	5.3354	2.4618	4.68955
Tnmd	14.6405	13.7216	15.4005	7.45997	13.9791	8.45939	8.32723	9.35373	9.06268	6.3208	6.693	7.08017	6.04825	6.96785	7.40177	5.38923	5.81205	10.202	11.9606	6.80534	8.76081	7.65009	19.5962	7.66064	9.47098	10.4638	18.38	5.3532	6.4954	6.2096
Prkcb	7.55315	7.34339	3.77083	6.26836	4.87953	8.11373	5.2501	24.3593	8.41468	5.25983	10.2358	6.35293	6.65536	6.30961	8.82419	9.01088	8.25564	7.30307	5.46956	8.8572	7.53981	10.661	7.60744	3.84727	4.23172	7.62606	12.7501	6.69707	8.1185	9.92171
Kcnb1	5.15374	9.85682	4.92336	17.9687	9.47523	5.12889	4.93859	10.8816	12.7018	7.4118	4.36713	8.13466	9.20247	4.37491	9.05333	4.90304	6.61036	9.25502	8.68037	8.80834	23.1278	4.92238	8.82951	13.3129	6.7999	3.99633	10.3585	4.01824	6.15751	5.79635
Ap3m2	14.6405	9.99195	13.5894	6.60111	16.2373	7.45043	7.3661	5.32684	5.93066	11.961	5.5497	7.65157	6.38604	6.54236	4.47478	7.14855	5.52972	9.30415	15.2253	12.6287	7.41629	8.49548	11.6548	8.59703	13.5226	9.94782	4.97131	5.3799	16.6714	6.19523
Cds1	5.66763	6.66387	10.8667	6.65957	9.92186	5.44652	20.2672	4.54986	5.19343	8.68297	8.50364	8.41517	7.98369	5.11679	3.49768	7.77894	10.0178	6.63753	7.97114	7.42578	7.11222	6.67145	7.07303	7.86402	5.23498	9.21916	5.38228	6.26098	15.8026	9.76719
Klf15	4.74336	5.63302	4.32099	9.80723	3.59808	20.4828	11.355	5.32684	5.60196	10.1343	8.80787	6.67499	4.5282	3.46574	5.72426	7.22272	6.28909	7.40134	3.18383	10.0443	6.70364	6.18837	4.70357	4.35148	5.29072	7.48123	6.86773	4.56113	7.64484	5.91134
Jak3	4.07419	6.799	5.63014	8.12548	5.54739	8.23985	8.65393	17.852	7.87937	6.52099	5.99132	4.99196	22.8921	8.22613	12.0408	5.1997	8.31406	5.17691	3.90462	11.5735	5.41137	12.2476	6.12603	6.44036	8.96506	6.91098	8.82853	7.69829	5.50284	4.94828
Klhl41	14.2929	15.0343	8.2404	8.08951	15.2021	7.26359	4.81703	6.07768	6.07153	7.17158	10.2211	9.12163	9.6635	8.57162	5.95341	7.35044	8.34813	5.75312	5.82803	7.46975	9.34994	6.37161	22.5787	9.27073	8.99507	12.7357	7.96697	15.2408	19.0789	10.5829
Gamt	16.7404	13.5401	11.18	8.75951	7.80141	6.63299	5.08295	9.21178	8.55555	7.49188	17.9838	7.94766	8.74143	6.03322	10.1428	6.39456	7.51088	8.93342	9.90996	11.0605	11.2503	12.1893	11.8866	7.70724	8.79356	10.758	7.31337	10.4706	5.69592	12.3078
Apln	4.66942	11.7988	8.85883	15.9812	6.00237	6.73108	8.0651	4.36682	6.30631	7.20661	5.39758	4.78418	6.07564	4.41127	3.99488	5.07609	5.4129	7.47727	7.24263	10.9775	13.146	11.0275	13.5331	17.7449	8.06041	10.6901	11.0171	6.64812	11.0962	10.7518
Ptgs1	13.0248	15.2813	9.32065	9.06978	8.84494	6.73575	9.58847	5.89838	5.91187	12.031	6.81077	7.049	12.7903	9.6517	25.3658	7.7295	8.97607	8.63861	8.51462	10.5524	7.82487	13.2888	6.16926	5.97852	7.6188	9.06528	9.75941	7.23105	9.69936	18.9199
Aurkb	7.79346	8.15417	12.7863	7.40152	11.2826	12.0748	8.13728	5.46132	6.45657	7.20661	8.21414	7.3399	5.63286	7.0624	9.87911	5.94133	6.96083	10.93	10.4419	5.50094	7.40203	9.48245	19.5805	7.35133	7.94894	12.0116	25.5844	11.8144	3.88276	6.01555
Phlpp1	6.73979	6.90325	8.56166	5.86815	5.03815	6.3714	13.8888	8.12474	5.58787	6.09059	9.71565	8.77879	4.32279	18.8452	7.65685	6.97962	7.40379	9.90716	9.75192	11.1875	6.46609	9.12847	11.6548	12.3977	11.1045	7.23684	8.68989	9.98998	6.70055	2.66639
LOC100911599 /// Pex6	10.3925	15.8103	7.35291	5.17567	8.12699	7.343	4.912	5.40902	4.52665	9.06332	6.92362	5.77634	11.2931	7.65518	10.8908	4.65583	7.12147	11.609	9.31251	11.2022	11.9345	11.0816	23.231	11.7155	8.86645	5.54417	8.58591	5.04616	8.49561	9.22098
Apobec1	13.938	12.5594	19.332	8.66058	10.8318	5.86692	8.96924	4.72543	5.20752	8.19752	7.93444	10.2488	10.1839	7.76064	5.44756	5.25326	5.97755	6.6688	5.05712	8.42728	8.75606	6.32163	10.8807	23.4056	9.1923	15.2929	8.11056	14.293	8.84557	14.216
Got1	14.378	15.0149	15.4005	7.76125	11.9588	9.43566	4.61569	8.71122	8.92651	8.85313	8.7588	10.0826	9.42614	6.5169	8.41778	5.78477	7.89543	10.327	9.7712	7.96317	6.34731	8.7037	22.0561	7.05473	9.86114	14.9172	8.36309	10.0968	19.6853	10.5829
Mapk6	9.90449	4.53267	12.6417	17.0649	14.5969	5.56797	4.96139	5.09151	5.36717	5.71525	6.9089	9.06968	6.81056	8.36433	9.67158	6.53464	5.96295	3.77437	7.2542	12.404	9.50672	8.99105	3.43828	8.36399	6.50406	10.7625	6.05569	8.33017	9.31621	21.9097
Dbnl	7.36459	6.40519	7.86291	6.08399	8.71554	6.25463	4.80183	24.3593	8.19398	5.79532	6.63903	9.13201	9.30746	12.4192	8.44372	7.43697	8.3822	7.21373	6.25973	7.36716	6.32356	9.48245	5.72523	7.77504	7.78601	3.55279	11.0072	9.21125	19.4862	11.7293
Ppp3ca	12.5257	12.2351	14.0472	5.86815	10.5521	4.74585	8.0765	5.75269	5.65361	8.43774	8.95999	9.57355	6.66905	6.03686	7.84276	7.301	8.31892	5.38685	7.98655	8.91094	7.63008	5.43461	18.4017	4.49554	5.51366	14.0437	7.04599	13.0737	9.08994	23.7604
Mllt3	12.9435	7.52485	12.6256	14.9874	16.2373	7.11878	5.48944	11.7557	8.56964	5.90042	9.1121	7.21523	12.658	3.87668	9.07495	10.6713	10.4218	8.09814	8.22553	8.19278	7.88663	8.39137	7.07303	10.1563	10.3585	11.3011	10.6408	11.8901	18.0562	8.11417
Dpep1	22.2084	9.99195	6.62204	7.8242	10.7066	6.33403	8.00432	4.77772	6.63501	10.1343	6.97269	5.80231	9.45809	7.29878	8.25349	7.98907	7.85162	6.79386	7.36212	11.7005	7.9484	7.61678	9.45429	9.71138	20.8499	11.1698	10.4229	8.87751	9.85925	5.94368
Slc2a8	9.9008	5.5365	8.8508	6.35379	3.4979	5.47922	5.53882	11.5988	11.0161	17.0206	7.7627	8.52425	4.9938	9.88081	7.03427	8.38873	5.04295	5.16798	6.84562	7.46486	9.76327	5.07646	9.8826	11.6859	8.8836	8.96119	11.0765	12.6332	19.6853	9.10239
Gc	15.8235	7.64453	4.42941	7.27561	7.65949	6.65167	7.80298	4.61336	5.37657	9.67388	3.7734	5.15819	7.6322	5.97504	5.40433	9.90909	3.83089	12.7703	10.5614	7.03495	4.67497	4.76413	6.03959	5.82174	6.8685	6.98792	5.98637	5.81154	6.41696	20.9574
Dnm1	9.52739	8.04993	5.20045	8.9079	13.6118	10.3512	8.49058	10.5902	11.4199	6.67613	6.3397	6.72694	9.70915	10.71	7.53147	5.83833	10.6506	5.12778	18.2588	5.14431	22.724	8.87444	11.3797	6.28782	7.96609	12.6	11.3142	12.166	7.87714	9.81031
Cpz	11.5201	12.8606	7.44126	8.86293	11.4287	9.19276	9.99115	4.90473	9.55103	13.6475	7.1199	9.8125	8.98336	10.3681	7.66982	8.80899	6.0457	8.73241	3.88535	20.6896	8.49951	8.71619	10.0162	6.54629	8.37768	7.97455	9.98718	12.4063	16.3607	9.44377
Dnase1l3	11.1911	8.23139	19.2637	8.6336	7.00415	12.1029	12.2173	21.9574	9.43834	11.8008	11.8403	12.2799	9.01075	4.86586	7.84276	4.8948	7.47194	12.0735	11.1511	9.4581	9.69676	9.55325	7.31666	11.2537	8.39912	3.94202	8.83843	12.206	5.86788	7.83028
Slco2b1	14.2929	9.99195	6.29676	7.11373	11.5164	10.2438	4.79803	5.932	7.91224	8.36268	10.3535	9.05929	8.98336	12.2774	13.9215	7.78718	7.64231	26.1481	7.58569	10.2788	10.3524	12.2601	9.18316	10.4105	9.56102	11.0386	9.52669	10.4483	16.6714	9.2102
Gata2	5.9671	4.99597	5.16832	6.43473	9.58375	7.64195	4.63468	9.11465	9.24112	6.33582	7.2622	7.06978	4.16759	9.2844	5.1233	6.34923	7.65692	7.2048	9.99861	7.79218	6.10026	6.91299	6.31072	23.3251	8.75498	27.2683	6.81822	9.06885	5.02315	4.77938
Txnrd2	13.4796	5.16971	10.3366	5.1307	12.322	9.25815	25.164	7.87446	10.9926	12.8468	6.68809	10.8462	11.0786	8.69163	10.078	7.80366	7.54009	9.34882	8.1947	12.1548	7.04571	7.84166	22.3979	5.66921	9.87829	7.65322	9.36329	11.3917	4.15126	12.1569
Myog	14.548	14.3972	8.99135	7.74776	14.8264	7.45977	5.09435	9.61148	10.3117	7.06649	8.12091	9.26707	7.09357	14.874	6.34252	4.02956	7.25289	6.52586	8.02895	8.70086	6.44233	11.5897	12.6922	10.2198	11.5332	12.9892	9.8832	13.403	8.96021	23.7604
Mgmt	6.56972	4.70255	11.4611	6.81245	5.47643	7.88952	7.17995	5.16622	4.20264	21.5848	5.78523	8.0983	4.57841	3.40392	4.34508	4.41274	6.31343	6.7492	6.09784	6.1165	10.989	8.44967	14.2482	10.7368	11.3918	9.74416	5.64966	4.36533	15.7452	6.34975
Ggcx	8.33323	3.16206	4.34508	18.18	4.3369	7.67464	7.61683	4.43032	6.33918	6.2107	16.2173	4.74262	8.71404	5.79684	7.90761	6.46872	7.74453	6.25339	6.96896	6.47802	6.7654	8.06237	6.39717	7.39794	6.46548	10.1289	7.05589	8.79296	7.94352	5.29326
Aqp7	6.95052	10.3471	10.9992	8.21092	9.66724	10.197	12.9163	5.95067	7.65398	8.46777	8.31718	9.29305	7.87413	9.06257	6.49384	5.2615	7.59363	7.5934	7.80925	11.764	9.94856	12.4684	7.85107	20.9693	8.68209	9.4002	9.34349	8.97986	11.4914	23.0381
Homer1	13.9195	13.0922	6.22447	6.83494	12.1717	7.08608	8.4298	4.6806	5.57378	9.06332	6.82058	7.92688	6.4043	6.34961	8.69448	7.404	8.27998	6.90106	3.99328	6.06276	6.34256	6.40492	13.3012	6.92762	5.58655	14.4692	6.18443	14.3776	8.50768	23.6633
Egr1	4.27383	5.96119	23.388	6.06601	6.91232	7.28227	5.24251	8.92414	10.0394	8.04238	7.45357	5.63608	4.40039	6.37871	8.47831	5.65704	7.32591	8.44655	14.7744	9.26757	5.63467	4.23941	7.99646	6.27935	9.3295	4.97391	7.53619	4.32973	9.97088	5.20701
Egf /// LOC100910178	13.1099	7.50554	13.5613	6.25037	14.9809	6.13318	4.94239	13.6608	5.53622	4.9045	6.904	8.71645	8.54515	4.9495	4.0165	6.60881	7.54496	7.68274	7.11929	7.03495	5.47313	7.04208	6.80976	7.03779	6.27254	11.55	5.66452	15.2987	9.54851	21.9097
Gys2	9.2612	9.42054	13.1477	18.9445	7.06677	6.50687	10.2343	6.87335	6.71484	7.01644	19.1909	7.09056	5.91131	6.49872	3.68791	5.61996	6.41565	8.72348	5.2961	11.6516	7.56832	2.64443	5.42266	7.03779	8.21905	5.01917	6.19433	6.99076	3.51771	5.42981
Ctbs	11.8307	8.31247	11.9189	7.13172	5.84793	6.55825	7.81057	6.06274	6.2124	9.2585	7.6155	9.24629	24.5673	9.20076	13.8783	6.14734	9.09289	7.97754	3.97786	7.03983	5.59191	8.02489	11.8316	5.93191	11.1774	7.35904	5.47636	5.6469	19.0789	9.50486
Gbp2	14.6405	15.0343	9.33671	7.63085	15.2731	7.343	10.7129	5.74896	5.86022	11.0451	8.95999	8.46192	12.836	13.1356	14.1377	5.78477	8.51363	6.12832	4.70636	7.79218	6.17628	12.2601	10.2402	7.02084	24.357	10.0881	9.5564	13.0871	15.9806	9.50127
Apoa1	15.8235	3.27016	6.09195	8.03105	3.20154	5.95567	5.30329	4.23981	5.49865	5.03462	3.847	6.62824	6.05738	3.86214	9.04036	11.1575	7.26263	10.1707	11.101	6.47313	8.24296	4.84742	7.24593	6.64374	6.39259	16.7954	3.35712	5.96284	7.36125	6.41803
Fdx1	11.4499	16.2775	10.0355	8.08951	12.155	8.85644	21.0916	5.15501	6.08561	13.5074	6.72244	7.78663	7.50439	6.23324	7.79088	6.32451	8.0366	6.88766	16.2699	9.4923	6.7369	8.47466	7.61137	9.89358	5.99815	12.6814	5.95666	11.3294	10.5803	7.91293
Glycam1	10.411	7.35497	4.05193	6.89789	3.4979	5.12421	4.80563	24.3593	12.3168	5.84537	11.5312	8.18661	6.92011	8.94256	5.694	7.55233	19.096	7.11547	6.51798	7.12289	7.79161	3.9354	2.08262	8.42331	6.8342	8.20084	8.18979	12.1482	4.27496	10.6224
Cd52	11.6643	8.01132	5.82289	6.12446	5.68096	5.73146	5.2691	7.415	3.42316	6.37085	6.29554	7.45418	6.24453	4.3349	20.9299	6.53052	10.4899	5.55212	7.2118	4.97332	6.20479	3.78548	4.89218	6.56747	3.84584	3.61163	7.71939	7.4313	11.5879	10.5757
Ptprz1	12.3926	14.1269	4.68643	5.91762	6.84971	5.08217	19.6404	8.3414	8.65416	5.57512	7.09046	6.70616	8.17541	4.37854	7.67847	6.02374	8.73268	7.98201	7.07303	10.2837	4.28539	8.05821	10.3423	5.86835	19.2807	11.1336	11.3142	13.7457	12.0224	9.72048
Gfap	2.78391	4.51336	7.34488	16.822	9.2707	5.46054	8.40701	8.33767	8.83259	7.32172	6.40349	6.11398	4.35474	4.39673	4.76878	4.91128	5.89967	5.39132	4.97232	5.10034	16.1011	9.40333	5.92956	4.77519	4.89198	4.04159	5.06044	8.20113	2.79969	2.28907
Gstt1	8.99131	9.96106	8.87489	6.68655	3.95288	7.92221	21.0916	7.34402	5.29674	10.2144	7.78724	10.0359	7.73719	3.66576	4.93739	8.59474	6.4984	8.71455	6.80322	9.64374	7.02195	9.46996	9.66648	7.49539	9.874	13.1883	11.9381	5.34875	12.5835	9.93968
Erap1	21.0697	11.3741	10.2764	8.12098	9.61715	9.17407	8.61974	10.2278	12.0679	8.04238	8.24849	7.82818	8.6684	20.889	9.17439	7.46993	10.0567	8.80388	11.5404	6.9519	11.027	12.9681	11.3483	7.88096	7.58879	11.1245	8.066	7.1999	11.0298	7.95965
Ptprr	7.97092	9.25838	6.24054	7.90964	7.78471	9.45901	8.4146	6.57824	6.74771	7.57695	5.63311	9.43849	6.71926	21.3727	8.55613	8.25689	7.47681	11.8725	10.0796	11.9008	6.92218	13.801	14.4408	12.9443	12.4765	10.2873	8.47202	5.95394	10.5652	23.0381
Plg	15.8235	4.0655	4.54587	5.98507	5.73523	4.75987	4.14842	4.95329	5.36717	5.63517	6.98741	7.00744	5.36354	3.92032	3.81762	8.33517	4.70708	8.43761	11.101	8.16836	4.53244	5.59286	6.45611	16.461	6.25968	5.05538	5.98637	7.33785	2.77857	3.75882
Ptpn2	10.8842	5.88011	7.89504	8.80897	8.53605	7.8755	7.11157	21.9574	7.66337	7.35675	8.79806	8.75801	10.6586	9.48442	8.57343	15.9122	9.25353	5.75759	8.20241	6.90793	11.9345	8.89943	8.64482	10.4147	6.07103	4.56659	5.29811	6.34553	3.29145	8.54539
Asgr2	11.6976	6.38589	13.3846	9.34857	12.3679	10.51	9.17819	5.22598	8.1705	5.97548	7.75289	9.88003	8.37169	5.05496	7.86005	9.64128	8.77162	10.6888	6.4062	10.0785	9.52097	8.57877	13.034	24.1344	14.7531	14.9398	4.94655	15.2898	13.5519	11.0429
Klf5	7.83043	14.0266	10.9792	5.58486	15.4776	6.09581	13.2734	4.47888	5.62074	5.7703	6.9089	4.48289	7.3218	3.84032	9.09656	6.9137	6.45459	5.72185	5.66228	5.9162	7.60157	5.85105	8.02397	7.75385	5.86952	14.4465	6.55579	14.916	9.21967	23.1207
Aldh3a2	9.32775	14.9261	14.6295	6.60111	14.7054	9.81869	9.09461	6.99288	6.14196	6.65611	9.66658	9.87484	8.22105	22.0673	13.2557	7.75834	8.64993	8.47335	8.48764	10.3814	4.74623	11.0608	12.2285	11.6308	6.697	14.9172	8.99193	13.6878	19.6853	9.84984
Sts	8.86931	10.1734	7.13606	7.57689	4.05306	5.96034	6.26821	10.1905	9.84686	5.27985	7.26711	10.9657	12.1878	10.5354	10.7395	20.3991	7.20909	13.8781	9.76349	6.55618	15.9491	5.17225	4.54246	6.51239	5.97242	10.4909	5.00597	6.09188	13.0481	7.24454
Rgs7	5.22398	4.5983	5.04785	18.6252	4.66248	13.2146	8.92366	5.0168	10.0816	6.94638	8.43495	11.028	6.35408	3.71667	7.61794	4.17789	8.91279	10.0099	4.91451	10.7674	4.54669	7.67925	8.57016	4.9362	6.98426	4.95581	4.4613	4.90377	4.52838	17.08
Ggt1	3.47156	3.31263	4.29288	5.87715	3.45616	9.07598	8.84768	4.42285	8.08128	5.02962	3.66054	5.41272	5.39093	4.98223	16.1784	4.43334	6.13332	6.15066	6.15566	6.12627	4.78424	3.75633	7.3756	6.49544	3.01408	4.60279	6.97172	6.46122	3.12552	17.4861
Nr0b2	12.9176	13.2158	6.7144	7.22615	9.77994	9.25815	25.164	5.04668	6.21709	13.5074	6.8353	5.63608	20.1304	8.09521	9.82723	7.42873	7.61797	7.87034	6.32911	7.87523	4.95528	8.94107	7.97681	9.07582	6.23396	11.4414	8.17988	13.6967	8.49863	8.58492
Vtn	14.7218	4.09253	4.64627	2.82391	4.58317	5.82021	5.52363	5.20731	4.7896	6.07057	7.90991	6.2854	5.41375	3.61848	4.83363	7.74186	6.52761	5.85139	6.91115	5.80383	5.45413	7.55848	17.1089	5.39804	4.81052	4.53943	6.2686	4.85037	2.62471	3.65461
S100a3	5.47169	4.44773	5.22856	6.95185	9.42096	8.09972	7.727	4.94582	5.19343	5.47503	7.00704	9.51122	6.07564	4.63311	7.56174	13.5678	6.3621	4.76151	8.08292	6.83465	6.92218	3.3732	5.60734	4.73705	3.27561	3.68857	25.5844	6.16753	4.37452	4.15411
Bdh1	6.32571	7.82214	18.324	6.28634	6.86224	4.91869	16.3126	7.37391	8.11885	6.95639	8.39569	8.18141	8.31235	4.48764	4.75581	6.12674	8.44062	5.48065	5.26912	7.00564	9.13614	5.68447	6.32644	3.82184	6.01101	6.0918	5.73384	4.98386	8.85764	7.82669
Apba3	10.7807	12.0459	13.5332	7.98159	5.22598	3.48932	4.49032	8.81955	9.46651	5.93545	6.74698	5.81789	9.37593	15.874	11.2929	6.4234	22.1481	4.41311	5.79719	6.07741	8.94135	7.93328	9.64683	7.59708	7.16862	10.3461	5.57539	5.26421	6.63116	11.6682
Araf	9.42757	12.6791	9.09576	8.9034	13.5992	7.29628	10.371	9.51809	12.1055	8.30262	10.8344	7.19964	6.38147	11.6446	12.8969	16.9629	6.59575	6.32933	4.08579	8.66667	22.2631	6.55484	5.58377	9.99527	4.8191	5.13232	7.5659	5.14406	7.68406	9.69532
Slc7a1	14.1229	11.4977	15.5692	6.77648	10.5897	12.5046	25.164	8.10607	5.96822	10.2144	8.28774	9.0489	8.97423	9.52442	5.82803	7.32984	8.25564	7.21373	15.2061	5.85269	10.3334	8.51214	11.2972	9.33005	4.72477	8.45429	10.0169	11.0268	6.79407	7.07564
Gpc3	8.72142	13.1386	14.0673	15.0279	14.7638	6.48351	5.00317	5.44638	7.50371	6.72117	9.33782	7.50612	6.66905	7.60063	8.63828	3.48157	6.68337	9.44709	9.52836	6.08719	7.4828	8.0124	19.1561	9.38513	9.20087	6.94266	10.9131	6.27878	13.0964	11.1184
Ugt2b15	15.8235	4.29329	3.9435	8.31884	7.14607	9.1694	4.25479	4.93088	7.10928	8.79808	9.22496	8.23336	6.07107	4.99314	5.87991	5.90837	4.70708	9.40242	9.90996	6.52198	8.16219	3.65639	4.67999	16.1729	5.28643	7.64417	5.71403	7.14651	8.09436	4.19005
Cacna1h	5.5863	7.94182	3.76681	5.5309	13.6118	12.1402	21.4525	8.52444	7.09519	9.26851	6.57524	7.79702	22.536	3.99306	5.71129	6.32451	8.29459	4.70344	5.38861	6.10184	7.10747	7.0754	3.68191	6.56323	5.45793	3.90581	7.99173	10.0745	5.68385	6.11977
Cpq	14.0748	12.2467	13.2882	5.74225	8.65293	8.24452	5.54642	5.75269	7.01536	9.0383	7.51736	8.07752	10.6221	9.5717	10.1601	6.66649	5.20845	6.642	10.438	11.9887	7.37353	10.4153	9.56824	17.9864	12.2921	7.02865	21.6232	6.43897	11.1746	15.0856
Timm8a1	5.75636	10.2313	10.5615	7.85118	14.1127	5.11954	19.6176	9.35746	11.4528	6.21571	9.56353	7.3399	7.93348	10.6809	12.3435	5.77652	7.96845	11.81	23.235	11.9545	7.9864	13.2513	10.0083	12.8341	15.3019	10.2465	7.63027	11.5163	10.8126	8.06386
Gria2	9.27599	10.3394	11.6699	9.25864	14.217	7.75872	7.90935	9.54797	12.6455	7.15657	6.04529	8.41517	10.3984	7.26969	7.49256	7.22272	6.78559	6.54819	6.2713	12.404	8.85583	7.78336	23.1367	13.6137	10.9116	4.49417	9.60592	7.49805	15.3199	6.2132
Dync1li2	12.3261	9.33174	10.1399	7.98159	9.76741	8.1838	10.7054	17.852	6.47536	9.45868	5.49081	10.3371	8.40364	6.50235	9.58944	9.13449	7.7348	8.50908	7.16169	7.92897	7.34502	6.67561	12.8454	11.2283	23.581	8.66701	7.13016	5.5579	3.3186	3.82351
Rbl2	14.4926	15.0343	24.6529	6.06601	10.932	8.04833	10.8839	20.8068	6.30162	9.41364	9.2544	5.30363	7.36289	6.38962	6.93051	6.74889	8.01713	6.44993	6.43319	10.0004	9.74902	7.74588	10.5545	9.55461	13.1539	3.77909	4.79305	11.81	3.52676	7.42421
Rala	3.22016	7.43605	8.26449	6.67755	3.58973	5.19428	4.58149	9.57786	8.12354	5.61515	6.13852	7.76065	9.80501	7.69154	25.102	8.36401	7.95871	9.75082	5.10723	5.96505	8.7133	4.35601	5.02185	4.50401	24.2241	9.77132	5.72394	4.71687	3.40609	6.3246
Star	7.01337	12.4629	9.13592	6.37178	10.5605	8.85644	21.0916	9.18189	11.1241	10.2144	7.91482	5.38155	5.68764	5.28771	4.60449	9.17157	8.46009	4.87765	5.46956	12.5896	21.4602	10.1238	7.855	6.51239	8.86645	4.96486	5.39219	5.60685	2.84796	4.21161
Hpse	3.0501	6.13493	23.388	6.16493	9.33748	7.19819	4.9082	24.3593	12.3919	7.39178	7.92954	6.49318	4.61036	4.98587	5.77615	6.71593	6.51787	4.88211	7.54714	8.21233	9.89155	10.1571	4.75465	9.93171	9.25232	4.7974	8.18979	7.4224	5.46362	5.83229
Grk5	5.66394	7.57118	4.67438	4.03351	8.39413	6.11916	4.42194	5.00932	6.69136	6.46093	6.22685	8.83593	5.39549	8.78254	10.6314	4.82064	8.78136	13.1187	9.03884	8.83277	6.07651	8.84529	15.8868	6.45307	7.54592	8.60817	6.94201	6.21203	11.7358	23.0381
Ptpro	14.8993	14.1269	11.184	7.95461	11.6833	9.36092	7.82197	5.48747	15.0685	12.5165	6.66356	9.50083	9.92369	5.50227	7.74764	5.38099	6.37184	9.02722	6.19421	9.83916	6.93644	12.6349	9.03384	8.87668	5.99815	6.43576	8.3928	7.95638	16.5236	12.7426
Myh3	14.6405	9.99195	13.6657	5.61634	15.2731	7.7307	5.17033	5.86849	6.78058	9.56878	9.92664	9.05929	9.6772	7.68427	5.44324	4.0378	5.94835	5.39132	5.32694	11.2999	7.93889	15.6458	9.35998	6.0675	10.873	12.7901	10.2447	13.6967	16.6714	11.1974
Meox2	6.23698	6.82989	8.7504	5.39151	10.8318	6.98332	7.29772	4.7441	7.49432	8.51782	7.88538	8.46711	9.2116	17.4305	9.27815	6.07318	5.93861	8.83068	7.17711	10.8211	4.88401	9.59073	6.51898	8.08434	11.6576	5.07801	9.75446	8.93091	12.134	5.56996
Caskin1	3.38283	7.23914	4.90729	6.67755	4.4329	23.6919	7.83717	9.35373	7.86059	6.13563	5.67727	8.58139	7.13009	7.6079	4.38831	5.45103	6.79046	6.7492	5.37319	4.7779	24.192	10.3195	5.08473	4.50401	8.36482	4.24072	6.14481	5.21971	4.20859	4.62846
Crot	6.0854	5.24693	11.3085	5.18916	12.2009	6.32936	12.4984	5.78631	7.23606	5.6702	5.64783	7.9061	8.53145	9.11712	23.7747	5.29446	7.12633	9.71509	10.8774	12.3649	9.77753	12.9181	11.9967	11.7155	10.1398	8.06507	7.37774	4.83702	7.2979	7.05408
Lgmn	9.50521	15.0149	13.5332	8.3683	10.74	8.63222	12.0388	6.51847	6.65849	8.4928	8.43004	6.69577	7.3355	4.88768	10.4109	7.94375	6.99004	7.96414	5.33079	8.74483	7.64433	8.33306	8.6291	14.0713	26.9338	10.672	8.2492	7.72499	16.6714	11.2369
Ros1	21.6612	11.8066	14.9227	6.52467	12.1967	7.00667	5.38687	8.0575	6.05744	6.36084	8.6852	4.59717	9.60416	6.89875	4.09	4.41274	8.57205	5.85139	16.9753	8.98422	5.53965	6.09259	6.51898	8.5589	5.8781	6.62585	10.2793	4.32528	3.747	8.13214
Sacm1l	13.1099	6.46697	10.9912	6.79896	12.5933	9.26282	8.60455	11.5129	10.2883	7.39178	6.74207	8.48789	9.49461	22.0673	14.1377	7.10735	9.24379	5.25285	4.33633	9.84404	6.40433	13.447	14.1932	13.6137	12.9738	10.4592	10.7398	12.1793	9.41275	22.2331
F2	15.8235	10.7796	7.95528	8.57515	5.13833	5.61935	8.4222	5.43517	6.56927	11.1703	3.35141	4.78418	10.8503	3.6003	7.31097	9.90909	3.83089	11.8904	9.74807	7.03495	8.27621	9.64487	16.3387	5.26669	8.44199	5.29072	5.98637	7.16875	8.16978	6.72348
Necab2	9.67158	11.6792	7.38102	6.50218	16.1872	7.79142	4.82842	11.793	5.5597	7.49188	8.34662	7.58923	23.6726	3.86214	12.9358	7.6677	5.43724	4.52031	8.45681	10.8602	13.146	12.3518	5.36372	4.11844	7.16433	4.21357	5.52093	14.3331	3.87069	9.58392
Sgta	9.23532	12.4861	9.35679	7.27111	7.99759	6.20791	8.85908	5.57339	5.3343	8.51782	6.85493	7.44898	10.1428	17.1541	9.61106	6.86014	7.95385	7.29413	6.50257	7.12289	9.36419	12.4975	12.8729	10.7876	7.70455	4.97844	6.77861	6.83056	16.6714	9.09161
Fads2	5.05761	7.09243	10.176	7.70729	9.35	11.8927	25.164	4.78519	5.96822	10.2144	5.9079	9.55797	10.2797	9.83354	7.62659	7.53997	7.93924	7.714	3.91619	11.4904	9.28817	16.2289	10.7235	11.4613	9.67249	10.1424	8.2492	6.16753	11.3194	10.1373
Nkg7	5.36077	7.09243	8.34481	7.56789	8.34822	6.04442	4.61189	20.9525	5.31083	5.30487	6.89418	6.96069	5.84284	5.99322	6.78784	6.32451	6.19173	4.41757	6.12482	5.97971	5.94823	8.24977	3.55616	8.73262	7.62309	3.77456	5.61996	4.73022	7.69915	22.2331
Gdf10	3.13143	11.5479	14.0874	6.54715	13.186	17.7175	6.14665	10.4183	10.2601	4.98458	7.1199	7.27756	10.1565	6.06232	6.08743	6.80246	7.75914	11.2382	6.81478	12.6287	8.40449	13.3221	9.26175	17.9864	10.1355	7.48123	7.17473	5.5312	8.78222	11.1866
Slc2a5	8.85082	2.77983	5.54179	7.9636	6.7871	6.93661	20.1381	9.18189	9.50877	9.66887	7.35543	8.18661	8.40364	9.26622	12.1705	7.08675	7.85649	8.90662	10.5151	10.9091	6.23329	10.5777	8.92381	24.664	7.9275	9.74869	7.87784	12.8512	11.1324	12.9726
Vegfc	11.7937	9.55953	9.58569	8.17944	11.5122	8.34261	4.68786	9.24166	9.12842	8.69298	10.0248	7.98402	7.3355	22.0673	9.91802	8.28985	8.44062	8.50461	9.57461	12.9902	9.21691	8.92442	11.2618	7.94452	12.2921	7.32736	10.4378	12.6733	18.373	14.18
Clec10a	22.8073	13.5169	11.9952	7.01031	10.9236	9.18809	8.23605	5.89838	5.31552	7.02645	6.07964	10.6644	9.16138	4.48401	5.71562	6.8107	5.68062	11.0908	10.0449	12.9902	7.9484	12.6266	13.1794	23.8505	9.50957	14.012	9.76436	13.8436	6.7458	6.62286
Odf2	8.58833	12.5903	8.13599	7.99957	6.37804	5.87626	5.2539	4.80761	6.2077	6.3158	6.22194	8.7632	10.1382	8.59707	7.32827	4.63111	6.44972	6.9502	5.07254	6.96167	5.40662	9.81977	9.9494	24.664	12.5065	22.8827	6.97667	4.94382	8.77015	4.73626
Cyp4f1	15.8235	4.15044	4.63824	4.62258	4.96302	6.07245	4.80943	3.5973	8.13294	8.84812	3.16985	6.52955	6.97032	5.07315	6.63219	8.33517	4.70708	7.45494	12.5118	6.97632	7.84863	8.71203	3.31647	11.2537	6.80419	5.29072	5.98637	5.83379	4.4439	11.201
Cyp11a1	11.6976	3.8879	3.90736	5.54439	3.38103	12.1402	21.4525	4.09412	4.82247	9.26851	6.46728	6.04126	6.51841	5.43681	9.67591	6.32451	7.62771	7.23607	4.27466	6.9861	5.64417	7.91245	7.99646	5.19042	9.84828	22.928	7.60056	8.94426	11.1746	10.0726
Ggh	20.8442	10.6367	12.5373	7.75675	6.92485	5.77817	9.93037	5.36046	8.59311	11.0201	8.36625	11.4851	11.8044	12.481	20.8477	10.3541	6.51787	9.26842	8.5339	9.84893	10.8607	13.1263	12.4957	7.80893	9.43668	7.40429	10.0317	11.7655	11.4733	12.8864
Gja5	12.7586	9.71396	4.88721	5.51741	12.5432	8.69295	4.18261	4.46394	7.03884	8.59289	5.49572	28.0558	5.62373	5.07678	10.7784	4.93188	4.80443	6.28466	6.26359	10.9579	6.68463	8.35805	5.70165	6.35138	10.903	13.4192	10.1407	13.7946	7.23153	23.6633
LOC100912479 /// Vcam1	12.4296	11.8915	7.86291	7.98608	13.5951	6.73108	8.4222	20.9525	8.83729	12.0961	7.58115	10.5397	11.43	5.93503	11.388	6.0979	6.8148	5.48512	5.80875	10.4107	8.29522	7.53765	6.61329	10.0546	4.39035	3.81077	5.63481	6.76382	15.7302	12.1641
Colq	9.05416	23.6865	12.7863	5.88164	13.9791	7.05339	6.93302	5.05415	6.87449	6.22071	6.482	9.5268	21.4907	9.5026	9.02739	7.41225	6.62983	5.45832	7.90561	9.23826	6.70839	7.64177	9.08885	6.28782	6.10533	14.0437	7.27376	11.3694	9.01452	12.9978
Nr3c2	9.76031	4.22766	4.26075	17.2627	3.90279	5.71745	8.61215	5.77137	9.19886	9.99918	6.9776	8.44633	5.08053	19.8707	8.24917	7.68418	8.35787	5.54765	6.86489	5.98948	4.89351	10.0613	10.1144	12.7494	15.3105	7.12822	11.3043	6.41673	10.7613	10.9063
Bcl2a1	8.66227	23.7946	9.90695	7.45098	9.86342	5.79686	7.84097	6.32049	27.1505	11.5956	8.86675	7.18406	13.0049	9.42259	9.61538	4.43334	8.21183	4.72131	6.17108	7.87035	10.2194	9.61571	4.33027	8.78346	6.91137	3.74288	4.45635	9.66514	10.164	7.11877
Irs3	13.9195	11.8568	5.0358	4.93285	8.79902	9.24414	8.04991	10.3025	11.9458	8.23256	8.70973	9.96834	12.7903	8.13885	7.35853	7.78306	6.00676	13.9585	23.4393	9.04773	7.98165	9.11182	7.77641	10.2453	9.60389	11.1789	8.88795	12.5442	16.8886	7.62186
Cd14	13.2836	14.1269	9.92703	8.17944	13.4031	6.53489	9.60366	5.69292	6.84632	11.6657	6.87456	10.5293	9.92369	8.41888	7.22883	7.72538	6.81967	5.15458	6.54882	10.103	7.44479	9.19094	21.0226	6.30901	10.1998	8.98382	9.59106	7.95638	16.5236	11.316
S100a8	5.42732	11.1579	11.4932	7.0238	22.6696	6.04442	4.98798	5.28202	5.53152	7.56194	6.10908	7.11134	4.66514	10.0517	8.07623	7.61002	5.96295	7.513	7.59339	6.29237	8.57553	13.2513	8.09077	9.99527	23.4995	7.03317	5.70908	4.36088	8.77015	10.0259
Gch1	8.00789	3.09642	3.71862	6.42574	4.77101	4.87197	8.95025	6.58198	7.49432	12.3163	7.91972	7.85935	11.8317	3.40755	6.08311	18.6316	7.7348	5.23052	5.79719	7.01052	7.67284	9.34503	7.31666	5.89801	5.06348	8.67606	10.8685	11.5163	3.93405	9.74922
Lamp1	3.93	8.27772	10.433	4.93285	11.3786	8.67426	19.6176	5.12513	7.57415	5.35492	7.74798	11.6098	7.31267	8.09521	7.28503	6.75713	6.8294	28.7924	7.85936	7.83615	6.41383	7.75004	11.0104	12.2155	13.4369	8.17369	8.48688	7.92523	10.1308	8.64961
LOC100361067 /// Psma3 /// Psma3l	9.58285	13.3007	14.2279	8.60213	10.548	25.2427	6.14285	4.55359	6.63971	6.57604	7.78233	7.82299	5.09879	6.19687	11.1675	7.19799	7.12633	10.2913	22.1442	12.6483	7.30701	8.77033	11.3837	3.95743	11.6061	10.6403	10.1704	7.89408	4.45597	4.37691
Gata1 /// LOC100911167	4.10746	3.21997	6.14817	7.18118	5.42217	5.21764	5.18172	4.61336	6.47066	8.0624	5.75088	6.90355	6.56863	6.97512	14.1593	13.3907	7.07766	5.71739	5.3809	5.54491	7.17874	4.32686	3.35576	6.94033	3.88443	5.47176	6.35278	5.52675	5.81961	4.67876
Enpep /// LOC100910501	10.4406	9.47073	9.52545	18.9445	6.19855	7.07207	10.2343	7.46356	8.0578	7.01644	8.76371	9.92678	8.29865	9.33532	11.3448	9.03973	20.7073	9.03615	6.63747	11.2657	5.59666	7.67508	11.6548	8.16909	10.8644	7.8071	9.76436	12.8512	8.89082	11.3771
Maob	3.76733	9.98423	8.41308	8.05803	9.35835	13.1772	10.0139	5.33058	21.2715	15.3191	3.42501	6.27501	5.50961	5.14952	7.66982	6.13498	7.18961	7.17353	8.82684	8.01691	6.19528	8.09153	3.55616	5.19889	5.65944	16.3112	5.08519	4.90822	3.40609	4.55658
Ptpra	10.7733	8.37038	11.7261	5.92211	10.4353	7.64662	4.9196	5.34179	13.7584	6.83127	6.6243	6.49318	7.97912	8.30614	4.02514	3.93891	7.99766	9.36669	9.04269	10.3472	6.93644	18.6817	9.3757	7.11829	4.25315	14.9172	4.9515	11.5608	3.47849	5.07765
Cd53	3.67121	5.01142	7.02763	8.094	7.63027	10.8603	7.80298	21.9574	9.43834	6.4309	11.8403	7.3399	14.1324	10.0699	14.0037	8.85432	6.35237	5.40472	5.40403	6.18489	9.82979	9.0202	5.682	6.94033	8.99507	5.40839	10.6705	3.6489	13.0029	3.05449
Apoa4	12.7734	2.96515	9.74632	7.05078	8.94094	5.47922	2.28315	4.4602	5.83205	7.92227	16.4724	6.5711	5.32702	5.16043	9.29544	7.87783	4.50264	12.136	8.30648	7.03495	6.00049	7.79585	10.2716	6.559	7.20721	4.08684	6.7489	8.69506	3.08026	3.58274
Napsa	10.3112	11.8838	8.17213	5.95809	7.00415	7.46912	6.96722	21.9574	9.43834	5.48503	10.5106	7.72949	10.7727	8.09885	9.47271	5.63644	3.45121	9.96969	8.11375	9.46298	7.28326	6.83386	13.0733	8.47839	4.54041	6.82499	10.6705	14.1239	6.38076	6.8241
Kcnc1	23.0587	9.9572	10.2362	7.47796	3.43947	5.2083	7.09258	6.88082	4.99621	8.2826	7.37506	5.78673	4.5921	5.2768	5.24436	18.4049	6.46432	4.96698	5.92053	5.54002	9.68726	5.73028	6.07102	5.33872	3.24131	3.53017	6.06064	4.51218	6.65228	11.334
Mrs2	10.3407	6.15424	11.7863	5.71976	13.0733	6.13785	5.75536	5.34926	5.64422	6.6461	3.78321	21.8119	11.4255	5.13133	9.04036	8.06324	6.2112	5.82459	6.39464	7.36716	8.24296	8.44967	3.98055	7.27083	9.9769	12.8398	5.15947	3.4976	6.53764	16.3865
Pex3	5.49757	5.77973	5.00367	6.19191	6.19438	11.7665	8.52477	9.06609	8.20337	24.1372	7.09537	5.32961	8.74143	5.19679	8.62963	6.70357	8.17289	5.48065	5.10723	5.42766	7.69184	10.9442	7.46598	6.96576	8.44199	9.74416	8.34328	6.73267	6.6372	23.6633
Cd99l2	8.82125	11.1695	4.95147	8.04004	5.98985	6.44614	9.1098	6.06274	6.82284	8.21754	5.73616	7.64118	6.25823	7.69882	6.86133	8.31045	5.85586	7.83461	7.67434	8.89139	6.21429	24.0497	9.12422	5.94038	11.023	10.5271	20.5636	6.55022	12.6318	12.5486
Heph	13.9306	15.042	12.5574	8.28286	8.01429	10.0429	5.04116	9.20804	9.65434	8.14748	7.9737	10.3995	13.434	12.9392	14.1377	5.90425	8.27025	7.45494	6.99594	6.23863	8.66579	12.5058	11.4858	20.1388	10.0755	22.928	7.28861	10.9111	13.0481	10.0726
Adra1d	11.6458	4.10797	11.8867	8.08501	8.74893	14.8261	6.6557	9.52556	11.8707	6.08058	6.14343	11.7189	9.07009	8.97529	4.73419	20.4898	6.6639	8.30361	6.50257	11.3585	10.5709	8.16232	7.26558	7.52929	9.75395	3.38986	7.66988	7.4402	4.60682	5.11358
Enpp2	11.2909	13.6829	7.61795	9.92415	13.4865	7.75872	10.1165	10.2727	13.2982	12.5765	7.3358	8.90345	8.03846	6.81874	6.08743	6.01138	6.29882	8.48675	6.54882	11.8861	7.84863	8.84113	5.7881	21.9184	7.11717	14.6095	10.2694	15.2987	19.7547	9.84984
Zfp423	21.395	4.42456	8.18819	7.47796	9.27487	6.10048	5.08295	5.70413	4.71447	5.85037	8.77352	10.1761	7.3355	9.3935	6.99104	8.29397	5.8948	11.9261	9.35876	9.43856	6.04325	5.7636	19.6198	7.90639	10.0755	9.53145	10.3288	7.79619	5.68084	7.51765
Nox4	9.77509	6.47083	5.95943	7.01031	9.64637	5.96969	4.61569	8.81955	7.85589	5.10469	6.03548	10.3995	4.93446	11.1391	13.8653	7.31336	7.7202	6.85193	4.7372	10.5573	22.1396	11.6188	10.2873	9.46139	10.4142	4.74762	7.50153	5.53565	5.11969	20.0518
Nol3	11.1948	11.2583	13.0995	6.66856	10.3017	8.44071	6.21503	5.33058	5.16996	8.25257	6.11399	7.93727	7.33093	20.4526	8.09352	6.12674	19.9771	5.94519	7.37369	5.32507	6.28555	5.00567	11.3011	7.28777	11.5075	12.2153	6.92715	7.38235	8.27538	10.2811
Hbp1	13.0248	9.85296	16.7137	6.67755	8.0769	12.6961	7.52566	3.17145	4.93517	6.95639	6.54089	7.90091	13.0049	13.1356	10.0218	7.76658	6.43512	4.95805	7.44307	6.82976	6.91268	12.6016	23.062	13.4824	10.1398	7.73921	8.83843	6.35443	7.13499	7.50687
Prps2	9.48672	25.9721	10.1278	7.86917	14.1001	6.63766	9.94937	10.1382	11.0396	10.7148	7.58115	8.32167	10.476	7.86974	10.1428	6.88898	7.24803	8.75475	9.31251	12.3942	10.0721	8.17898	23.2074	10.5334	9.50957	5.68447	8.44726	7.53809	13.2653	11.1866
Grpel1	9.34993	5.8029	8.99537	9.24065	13.4031	4.9	21.1752	4.8599	5.63483	8.30262	6.92853	4.75821	4.49168	11.5028	13.8783	7.51525	5.7439	7.62914	8.6264	7.86058	3.72952	11.2773	9.26961	5.8048	7.76886	9.8211	11.3389	5.6202	7.42159	10.8057
Cd37	3.19798	3.3551	8.44922	8.54817	7.68871	4.1246	6.29861	24.3593	12.3168	8.95822	11.5312	7.03342	7.66416	6.72783	7.22883	6.25859	6.72231	7.6604	8.13303	5.94551	10.1006	9.0202	5.29692	5.06755	9.35093	5.78404	8.18979	3.92924	12.8882	3.42463
Aif1	7.31653	7.44763	23.388	5.8052	10.8944	7.9409	8.28544	24.3593	8.24563	5.5551	8.00805	7.50612	10.1474	3.38937	4.48343	7.96023	5.65142	8.02667	6.60664	10.3472	7.93414	7.74588	6.69188	7.44031	6.52121	4.44439	9.25931	6.02514	4.89041	8.0962
Abcd2	13.8234	9.43598	6.28471	6.94286	7.10851	7.87083	5.33368	7.99774	6.44718	7.81217	6.18268	12.0825	13.434	7.57517	11.1459	9.14273	6.4984	13.8781	11.895	8.27095	9.15515	7.15869	19.4548	11.3596	12.3007	11.8804	11.7054	5.12626	9.06882	23.0381
Slc1a3	13.8936	13.1772	12.22	5.04976	7.92246	10.0709	10.1773	7.54947	8.63537	7.0765	7.5468	10.1865	8.47211	17.1541	9.0663	8.53294	7.31617	11.2918	10.7387	11.7689	8.07192	9.31587	7.28916	10.5588	10.2384	8.9114	10.819	9.79418	19.7547	6.35335
Ndufv3	11.5312	8.08854	10.9912	8.52568	6.99998	6.32936	5.2729	8.27043	8.44285	6.95639	8.19942	10.2644	9.64524	14.7394	10.4282	6.5882	8.99067	10.796	9.11978	8.06088	9.34519	7.86248	8.72341	8.4911	4.73763	14.6457	6.56569	15.1207	19.6853	15.1539
Akr1b7	8.21492	3.54042	4.21256	5.6658	6.80797	12.1402	21.4525	5.29696	6.35327	9.26851	6.81567	6.21268	4.13563	5.00405	5.82803	6.32451	7.69099	5.36005	6.85333	5.66216	7.02671	19.3772	2.90387	4.38538	3.71293	4.53038	4.86238	4.00489	4.46201	6.2671
Slc6a18	10.1152	4.94192	6.12408	7.16769	6.14011	5.33442	4.69546	4.85243	6.37205	4.90951	3.9157	4.89846	7.01597	8.92437	2.84051	6.38219	6.16739	4.62751	5.45414	5.96994	5.12156	4.52676	6.4954	7.43183	7.37442	21.4118	4.9515	7.56034	7.99782	3.34916
Hrg /// LOC681544	12.7734	7.02679	4.20051	5.61184	4.70005	23.421	5.2577	4.48635	5.11361	4.15381	5.4074	6.35293	6.1578	4.38582	4.95901	5.7312	4.70708	4.55158	5.45028	5.36415	5.0883	7.06707	6.41288	4.31758	4.60472	6.29999	6.2686	4.38758	2.86606	3.98522
Apoc1 /// LOC100911905	3.35326	10.5827	3.97563	4.4517	6.44065	7.55787	7.21794	9.51062	8.66824	11.5456	8.50364	5.97892	7.07074	4.08397	3.99056	5.7312	21.5834	8.25894	8.48379	8.16836	7.63008	5.10562	4.63677	20.1812	6.64984	5.96055	6.03588	5.27756	4.3896	5.88259
Ddx52	6.55124	7.95727	6.34495	6.43024	8.69884	11.6778	7.63582	9.93273	10.4526	6.85629	9.95608	8.61256	9.38506	9.11712	8.60801	5.57463	6.90729	6.60179	5.54279	8.30026	8.18595	24.2829	10.0359	4.57604	8.94362	4.75215	6.70929	8.55712	5.54206	19.883
Ptprj	17.7534	3.55201	8.34079	7.01031	5.73523	5.30639	8.0803	7.25063	28.2164	9.34858	9.93155	8.08791	7.6322	8.97529	5.05413	5.54991	7.59363	6.843	5.26912	5.73055	5.5349	10.3986	10.248	5.8048	4.97344	3.82435	6.0854	4.58782	7.1199	3.42822
Mmp16	8.32214	21.8333	9.57364	6.33131	7.28382	7.30096	7.95113	4.67313	5.24039	7.0865	10.0248	6.36852	11.9732	3.97851	5.94476	7.03731	7.9149	4.56944	14.7744	9.91244	8.91285	11.7396	11.3444	6.0336	7.00141	6.35882	3.83741	11.5919	10.4807	14.216
Usf2	3.28301	4.50178	4.27681	7.06876	5.07572	8.66025	7.78398	8.96523	7.19849	5.39495	5.96187	5.43869	10.9781	8.06976	5.08439	5.18322	20.9798	6.51693	5.86272	11.8861	22.0256	6.74224	8.85701	7.76233	7.53305	8.50408	6.5855	9.49159	8.73998	7.81591
Cd1d1	14.378	15.0149	12.7381	5.8052	4.98806	6.60496	10.371	4.58348	6.17953	10.5947	7.91482	8.72684	6.0939	4.46582	23.8915	7.98495	9.12696	7.30753	4.98774	6.65877	8.76557	8.85362	11.1793	6.81746	11.336	10.7036	10.3387	7.61374	19.6853	10.5829
Sik1	3.97806	2.83002	7.04369	6.01654	7.27965	5.91363	12.5592	5.72281	5.36717	6.33582	6.49182	6.41527	6.07107	6.00777	5.73291	7.03319	6.61036	8.37508	2.68274	8.01691	5.45888	3.23994	5.20654	7.17337	6.94138	8.92046	5.46151	7.4402	5.86788	16.9938
Slc9a2	13.9306	12.3278	7.86291	7.05527	24.1472	6.20791	5.03736	5.78258	5.93066	6.83627	8.43985	7.4334	12.0554	8.27341	5.44756	19.0971	6.56168	8.52248	5.61603	11.4074	6.5136	10.7526	7.43455	6.02089	9.27805	10.4955	10.7547	13.7457	13.4765	13.4146
Add2	7.95983	9.07306	6.43329	7.25313	4.30768	11.4442	12.1034	4.97197	4.72856	11.6107	8.74899	6.79966	4.77926	5.45136	19.6761	5.89601	7.76887	5.69505	5.05327	4.646	13.26	3.83546	4.43244	6.3768	3.61861	6.03296	5.61996	3.6311	3.62934	4.87641
Mefv	2.76172	4.94578	7.87095	16.3994	5.25103	6.60963	5.10195	8.54312	28.0474	7.2967	5.51044	6.01009	4.82947	5.97504	4.46181	5.10493	7.22856	5.18585	5.35778	5.93574	5.58241	3.8896	3.33219	5.70311	5.06348	5.04633	9.95252	4.08499	1.6774	5.28607
Sh2b2	9.07635	9.72941	14.2279	9.25864	13.4865	13.5089	9.125	9.44338	13.2982	9.60382	6.89909	10.6956	13.3153	11.7901	7.3715	7.37104	7.42326	14.9903	10.9044	9.21383	9.30243	12.9681	11.3483	23.537	7.08716	9.52239	8.78397	13.719	16.7559	8.35494
Cyp2f4	8.79167	3.9767	3.46161	18.4903	6.4323	7.21688	7.00141	3.98206	4.58299	5.60514	8.29265	8.23855	5.82914	9.12075	3.943	5.22854	4.94073	4.25677	5.50425	2.36452	7.22625	3.49397	3.68584	7.27506	4.67332	8.42261	3.74829	4.04494	5.33087	3.39228
Mlxipl	9.10962	13.9918	8.43717	17.9687	13.4865	9.2675	8.0803	11.1393	11.8754	11.3304	17.6992	9.55797	9.34397	5.19679	10.3374	5.9949	9.10749	6.66433	7.95572	9.07704	9.25492	9.94471	9.56824	8.41907	11.6104	7.92024	12.2451	4.67682	3.81337	5.74963
Grb14	11.5867	11.9649	3.70657	19.4211	10.8485	12.1402	21.4525	5.31937	6.95432	8.19252	6.07473	8.20219	10.4806	7.80792	4.58719	5.40571	8.03173	8.06241	6.64904	12.0669	8.12418	10.7526	12.5861	12.7663	15.3019	11.5273	8.93251	12.1838	7.79267	8.61726
Fbp2	13.9195	9.52478	4.38123	5.02728	11.8002	6.34805	4.99938	5.0803	7.04823	7.27167	8.12091	8.02558	7.09357	5.51318	9.96558	9.01088	8.40654	10.9122	12.4848	6.58549	5.22133	5.92601	13.0222	8.936	9.26947	14.3741	7.31832	14.293	8.50768	23.7604
Asip	9.47193	3.83385	20.9785	4.82942	3.30172	7.85682	4.96519	8.93909	7.50371	8.33265	6.38387	5.23091	6.29474	6.65509	6.08743	6.82718	6.0457	25.5942	6.08628	8.07554	9.11239	6.8172	5.91384	5.47007	5.06777	9.09696	4.80296	14.2663	6.05192	4.95187
Kcnh3	9.86382	12.3394	3.57405	5.00479	21.4132	5.79218	2.63645	5.09898	6.10909	5.43499	6.27101	10.4255	9.64068	5.50591	8.85013	6.12262	7.38432	7.89267	9.31251	9.47275	8.53752	15.2002	6.01208	3.86845	4.29174	4.81098	8.81863	7.28445	6.53764	7.34156
Spata6	8.18904	8.65222	6.12408	6.05701	5.60165	8.65558	21.4525	4.58721	4.62526	5.36492	6.73716	10.7787	10.4212	6.21869	9.20897	5.40571	7.96358	6.53926	4.76418	8.69109	5.91022	12.0144	6.8412	4.02522	7.4816	5.09158	14.29	7.89408	5.87392	9.93609
Grk6	4.73227	10.3047	12.5734	6.20091	5.17172	6.02107	4.38015	24.3593	9.43834	5.81033	7.52227	4.99196	11.7587	13.6957	25.3658	5.54579	5.99216	4.30144	4.45967	6.70274	7.82012	8.67871	6.99445	5.28787	3.56716	5.23189	10.8685	10.8577	2.82382	7.0433
Cox4i2	8.08183	5.45928	14.9227	5.30157	10.0012	6.32002	5.89592	5.9955	6.56927	6.38086	6.31517	6.83602	6.81512	7.27333	5.46053	5.74768	6.74665	9.43815	8.09448	25.5408	5.62517	6.9588	5.93742	6.9361	10.1227	10.8575	8.18483	12.8512	8.25124	7.03611
Klf10	11.4721	8.31247	11.0193	8.79998	21.4132	6.16587	9.144	3.60477	4.52665	7.81217	6.9089	5.10624	10.4304	7.2115	25.8111	7.47817	7.2967	6.26679	5.18818	11.7249	6.10026	10.7526	7.46205	8.1818	11.9791	10.6901	9.32863	7.53364	10.5049	12.9546
Casp9	4.14074	3.51726	6.37306	17.5685	4.84614	7.18418	5.66419	9.34252	9.97365	3.01777	6.86474	5.50103	6.26279	3.85123	5.57727	6.8725	22.8004	4.18531	4.79887	5.30064	5.21183	6.40909	6.65651	5.79209	4.82338	5.73878	6.04083	3.00812	8.20297	8.57055
Park7	12.9435	13.2158	9.5375	6.79896	12.2009	11.8133	11.4157	4.7441	6.17483	12.5115	6.79114	7.69832	7.40853	6.70601	6.58031	6.98786	8.76189	5.89605	14.3812	7.96317	9.87254	9.81561	8.36583	6.12681	6.45262	15.2929	2.60944	15.4678	19.6853	10.299
Npap60	7.38308	5.24307	8.05969	6.80346	11.5706	5.8389	4.60049	5.62195	19.6515	6.18568	6.68809	9.72419	7.18486	5.56773	5.24868	4.7712	19.9771	7.379	4.82585	5.413	6.14302	4.21859	9.01419	6.02512	9.84828	6.38598	4.70888	5.12626	5.95236	7.0469
Srgn	6.68433	8.61748	7.19629	6.58312	9.70063	7.22155	4.70686	24.3593	8.47572	6.81626	8.46439	7.41781	5.92044	5.66956	6.71434	15.9122	8.1875	6.32039	4.95305	7.88989	10.1671	6.9588	5.48553	6.54629	8.1333	4.51228	9.02659	4.64122	3.20999	4.07505
Plaa	4.96888	6.09632	5.67833	6.51567	6.36552	8.41735	9.65305	6.21216	5.0103	28.0007	9.38198	7.82299	7.76915	21.3727	7.592	7.70478	9.40442	10.9122	7.54714	4.38707	4.86976	11.2149	3.6937	6.42341	7.86319	6.90193	6.68948	4.24073	2.88416	6.7127
Pde4a	8.80276	11.9147	5.75061	5.82768	12.5808	6.54891	12.8479	5.34926	6.3204	6.07558	7.87556	9.78133	8.19366	4.83676	8.34861	5.54991	6.70771	6.7224	7.0846	5.54979	7.99116	7.11704	7.26558	8.04197	8.55775	14.1614	10.4774	8.61052	14.4118	12.3078
Srpx	14.378	14.5015	12.0273	17.4741	4.14072	5.64738	7.85236	5.83114	7.43797	9.92911	10.2701	7.79182	11.1288	5.42227	8.55613	5.20794	19.9771	4.71684	7.57412	11.1924	8.51376	10.3028	5.67022	9.88934	11.0831	12.9666	5.9319	8.04093	7.82586	13.3931
Pygl	5.03173	9.93017	8.43717	17.9687	10.6148	12.9203	11.374	10.381	12.6737	12.2212	25.6385	11.2098	6.2354	8.25886	10.8692	6.10614	7.61797	12.9311	10.1798	10.3863	5.59666	9.92388	7.56029	9.56732	12.3993	10.5814	11.2647	12.8512	6.29025	7.08642
Chn2	11.0506	12.3278	4.67839	7.53642	4.21168	12.6868	10.8991	4.78146	5.3343	14.3382	5.06391	5.7192	6.2491	5.25498	5.52106	5.82597	5.84126	8.93342	10.677	8.14393	9.42595	23.196	10.1498	6.24122	12.8838	5.92887	8.88795	9.74078	8.00385	21.0868
Bdnf	17.2025	7.01907	7.3248	7.53192	10.0596	3.54538	4.80183	5.28202	6.93084	8.53283	8.84222	11.7189	9.74567	7.08786	19.9917	5.89189	8.62072	9.81782	4.97232	10.186	8.77507	8.42468	6.75868	9.82578	9.75824	11.0974	10.2744	5.82934	10.2183	8.12136
Olr1	8.72142	13.7022	12.6538	9.38904	10.26	11.1173	10.7357	8.82702	7.46615	7.10152	5.94715	8.40478	8.33974	6.99694	10.4239	5.2409	6.52761	6.29359	4.71022	24.1387	7.79161	9.22426	5.88634	8.87244	8.97364	13.6726	9.43261	23.66	7.36729	11.2369
Cspg4	5.8303	9.04603	4.17642	8.26937	4.72092	10.4166	21.7868	8.81955	8.64477	5.18976	6.6243	9.95275	7.05705	9.45896	5.08007	20.4898	5.29121	8.03561	6.50257	9.31154	5.50639	7.825	4.31062	5.44465	10.0798	4.36745	8.28882	4.57003	9.28906	11.0609
Ambp	15.8235	4.68324	4.61414	6.62359	5.96063	8.05301	7.99292	4.8599	4.86004	6.12562	8.23377	6.36852	9.80501	4.30945	6.90025	7.07851	3.83089	6.9234	11.101	6.47313	9.1694	12.7724	16.9163	2.98714	8.99507	4.29956	5.98637	5.05506	5.49379	3.72289
Tesk1	4.35147	9.43984	10.678	9.00233	9.03277	4.06387	7.62063	6.58945	4.19795	7.60698	8.56253	5.75036	10.9142	9.28804	5.4	5.45515	18.8721	4.78831	4.00484	7.587	9.80603	10.3153	19.5059	11.9994	9.79683	10.9254	9.35834	11.8367	2.58549	8.35494
Grm4	9.50521	16.2775	24.3517	14.9874	14.4174	10.2064	4.86641	4.94956	9.31155	9.46369	6.84511	8.59698	7.21682	5.37499	9.36462	6.77361	7.30644	6.75813	5.58519	7.59677	7.82487	6.10092	8.58195	4.17352	10.1055	14.4601	6.63006	13.6834	11.5578	7.88419
Chka	6.23329	10.8182	14.6295	5.98956	14.7054	7.81011	8.46779	4.14642	6.9778	7.92728	9.92664	11.7085	25.4529	11.15	6.35117	8.08384	5.4275	10.3494	23.235	6.18978	8.42349	4.37684	4.7743	6.30901	5.00346	12.7357	8.67503	9.42039	3.30955	10.1948
Fgr	3.74515	8.45146	12.3325	7.20366	6.01907	5.44185	5.24631	8.30778	25.8826	4.95955	6.6194	11.0852	8.80077	3.74576	7.15533	7.50701	6.43512	7.16013	5.39247	6.99098	9.36419	8.92858	4.33027	8.20722	6.96282	4.72499	9.01173	6.34553	15.7302	3.31682
Fxyd7	11.2502	7.77967	22.2394	7.97259	11.7668	5.8389	12.6656	4.52744	6.60684	8.66796	7.56152	6.71136	8.16171	7.3897	3.67062	6.37395	8.23617	6.71346	8.34888	7.34273	8.48051	6.83803	11.0929	12.9909	10.6457	12.0433	9.20979	13.8703	6.05795	5.879
Plcl1	11.4499	11.7139	7.4774	8.08051	4.26177	11.7852	25.164	4.78519	16.8341	10.2144	5.99132	9.61511	4.35017	8.90619	3.7225	6.35747	8.12908	9.25055	5.39632	9.27245	9.18365	11.2482	7.69389	9.80884	8.46772	9.69438	8.14522	11.2938	7.28281	7.37031
Pdlim5	13.2245	3.39371	5.84699	5.89513	10.9696	11.6124	7.51426	5.72654	6.45188	8.22755	6.39368	7.60482	4.16759	6.11687	8.79825	6.50168	8.5331	8.37954	9.95621	22.5363	7.60157	9.59489	5.03364	9.04616	6.69271	13.1612	5.42685	5.3888	10.4838	9.2066
Tm4sf4	12.4555	17.3624	4.04791	6.35829	4.10732	5.32974	4.37255	8.93535	9.53695	6.26575	6.07964	6.56071	5.57808	6.17869	6.67975	8.09208	4.39555	7.11547	7.76685	5.66216	7.62533	4.26023	4.07092	6.00394	6.43547	4.33577	5.48626	5.02391	5.85582	3.83788
Itih4	15.8235	3.60606	4.83501	6.32232	4.12819	8.98256	8.18667	3.97832	6.16544	5.6652	7.4732	5.40752	7.38115	4.30217	4.16782	9.90909	3.83089	11.1087	11.101	6.47313	8.7038	3.63973	5.19082	4.13963	9.158	5.57585	5.98637	6.78606	4.56156	11.4777
Ppp1r14c	12.9398	10.0383	6.17628	7.01031	23.6296	6.3714	4.24719	9.00632	8.68703	5.82034	6.72735	21.8846	5.51418	5.77138	8.04596	6.5676	6.89268	9.99649	8.65339	9.87824	7.69184	6.27583	5.01793	6.06326	8.60492	12.9666	5.4219	8.97541	6.9057	10.6224
Aldh1a7	7.16865	13.9918	13.8264	16.5522	14.7638	11.5563	7.44588	4.90099	6.81345	7.78715	6.41822	8.68528	6.84707	11.1209	10.372	7.14443	20.9798	5.86925	2.95256	10.8113	7.66809	11.3523	6.24392	7.55471	8.24906	7.87498	9.34844	10.5729	4.41977	4.53502
LOC100911725 /// Pfkfb4	6.57342	6.10405	9.27647	5.64332	10.7066	8.06702	4.89301	5.09524	5.59257	8.12246	5.68709	7.049	10.1656	8.57889	25.2706	6.45636	10.1394	5.86925	5.75094	6.96655	6.39482	5.8802	8.22437	9.71138	9.84828	14.2067	11.1359	13.7991	15.1901	10.3134
Tdo2	15.8235	3.8879	4.22461	7.14071	15.7406	9.46835	8.0727	4.58348	5.24509	5.56511	6.31517	5.17377	7.05249	4.67311	4.63907	9.90909	3.83089	10.8139	11.101	6.47313	6.7559	3.96872	7.23807	8.73685	3.43425	3.8696	5.98637	4.57893	2.73633	2.75982
Lta	6.39226	8.19664	3.6624	6.17842	3.54799	5.82955	3.83691	8.98018	12.3168	5.9905	10.9571	6.42566	16.5882	8.25159	7.19424	8.12092	5.34962	5.77545	6.85718	4.76813	6.41383	5.33882	4.84896	7.6225	4.80623	7.24136	24.7328	3.89364	2.44973	3.97803
Lat	6.24807	3.0887	5.93935	7.12722	5.66009	5.6287	11.2752	24.3593	9.43834	8.1675	11.5312	7.23081	22.851	6.38962	8.15405	7.09499	7.03872	5.88712	5.34621	7.64074	7.79161	6.54235	3.57581	6.91915	6.65413	8.97024	12.7501	7.61819	6.35361	10.3026
Tpm1	13.9306	10.1425	23.3237	7.36105	7.30886	6.99733	8.90846	9.59654	11.6124	10.5647	10.1916	8.58659	7.27159	8.5898	7.6482	8.34341	9.52125	6.95913	8.98487	6.65389	9.31193	7.59596	22.5787	9.9529	8.99507	13.3422	8.34823	14.293	11.6302	11.3196
Jag1	9.48672	25.9721	10.8346	8.31434	15.9868	8.53413	5.94151	8.82702	6.46597	7.24165	8.16016	9.53719	4.7473	5.01132	8.92363	7.05379	6.93163	7.67827	7.44692	8.22698	9.77753	4.84325	19.3998	7.03779	8.40341	9.84826	11.3587	11.7477	11.2319	5.42622
Zfp347	7.07252	14.8026	14.6295	6.45272	16.1872	12.1402	25.164	5.21478	5.97761	10.2144	7.89028	4.82054	7.93804	7.72427	8.22755	8.28985	7.82729	5.26178	7.00751	10.8602	9.52572	8.56627	10.4288	6.75814	10.5771	6.94718	5.71403	11.9301	16.2611	3.80554
P2ry12	10.7179	12.2351	12.5775	6.38977	8.56945	7.61859	4.19021	5.16995	3.65794	8.07741	7.49282	6.16593	8.67296	5.56773	8.68151	5.83009	9.24379	4.80618	6.32911	8.06576	6.88893	7.5085	18.4921	8.51229	6.96711	10.9526	6.33297	11.8901	15.6125	7.27329
Tap2	9.48672	15.0844	12.7863	5.25211	16.1872	4.85329	5.56162	13.9858	5.68648	5.53008	6.84511	10.8462	12.5256	5.47318	9.67591	7.78306	6.8294	5.48512	7.58183	8.64224	5.92448	8.04572	7.80784	3.94472	8.61778	11.8758	5.98637	15.2408	16.6714	7.31641
Sult1e1	3.8043	4.42842	3.80697	9.0383	6.06915	12.6587	8.33103	4.45647	4.82247	8.31763	6.3348	5.9997	4.0489	4.09852	4.54396	6.57996	19.5779	11.5107	7.33129	8.85231	4.90777	3.77299	4.22024	3.07188	4.94772	5.81572	6.2686	5.31316	2.58247	15.3048
Chrnd	8.90998	12.3741	11.4852	6.65507	8.94094	5.99771	5.15893	9.5928	12.406	8.25758	6.99723	7.20484	6.8562	7.48425	7.45797	9.01912	7.01438	5.53872	18.016	10.103	11.3168	3.83962	10.362	7.52081	9.86543	13.1883	10.1902	10.8711	16.6714	10.1373
Trpv2	12.8843	18.6519	11.1599	5.43647	7.09181	5.95567	7.54465	4.7329	6.89797	9.71892	8.10128	6.55552	6.86533	7.81519	4.02514	15.2159	6.39618	6.53033	5.06869	11.0605	8.73706	3.42318	6.18498	7.35133	7.70455	9.73058	6.12996	12.4063	12.7434	14.2663
Cyp11b1	3.14992	2.76825	4.56595	5.49943	4.3536	8.85644	21.0916	5.23719	5.4517	13.5074	7.39469	5.00754	4.24062	2.222	5.0498	6.32451	8.0366	4.18531	5.72781	7.48929	7.20249	7.07956	9.38749	4.53791	4.21885	7.81615	4.34742	22.552	2.88718	4.01396
C5ar1	9.29078	14.7331	13.5332	7.25762	13.4865	7.99228	8.96924	4.9757	5.47518	12.2362	7.20332	8.45672	25.4529	8.10249	11.829	6.76537	6.32316	6.25339	8.16001	9.79519	6.64188	6.61315	6.66044	8.38518	5.66372	12.9892	8.5562	7.57814	15.7513	11.3843
Pde4d	6.88028	14.7949	11.6779	6.25936	12.7853	8.03899	7.34331	5.29322	8.65416	6.54601	10.2407	8.84112	8.41734	7.50244	8.82419	7.82427	7.37459	13.4627	12.6467	10.8162	6.81766	8.90359	12.2285	9.97408	17.0812	5.36766	9.0662	7.66269	16.5236	7.60389
Kcns3	9.77509	13.4822	6.03573	6.43923	9.30409	6.55825	5.35268	6.22337	10.6639	5.50005	6.21213	8.95021	9.40788	11.0518	12.283	5.79301	8.44548	10.5146	9.66327	10.4205	7.41629	21.2262	12.5861	13.0544	14.766	7.11917	10.0268	7.33785	7.78664	6.17726
P2ry6	10.2927	5.3782	22.2394	7.77474	5.26355	12.3411	7.30152	6.04406	27.5261	7.00643	9.51446	9.66705	9.48548	12.0883	9.45109	6.83954	7.2967	8.71455	3.85837	10.3472	7.87713	7.93744	8.08291	7.10558	7.50733	9.14675	7.51638	9.15785	6.05795	4.37332
Clec4f	21.395	10.3587	11.1599	13.7733	8.32735	7.50648	7.3813	4.57974	7.85119	6.8613	9.56844	11.0332	11.1927	5.14224	11.2929	11.8003	9.33628	8.20088	8.20241	3.86434	9.01262	10.99	5.27334	5.69463	6.697	7.47218	5.54073	5.47335	7.7625	8.44118
Olah	4.72488	4.1543	3.78287	6.6146	4.24924	9.25815	25.164	8.47962	8.17989	13.5074	5.71653	6.18151	22.1708	5.68047	4.18511	7.53997	6.43512	6.843	3.85837	4.13303	5.78195	10.3028	9.76079	7.32167	5.98957	10.6222	6.91725	8.34797	5.86487	3.68336
Cacng2	6.10759	7.53643	6.24857	7.4195	8.0602	6.10515	5.49324	4.84496	5.64892	5.92544	4.44564	10.6488	4.57385	6.28415	6.20849	5.48399	7.48655	8.53588	15.4258	9.05261	21.3509	6.40076	8.06326	4.79637	6.3197	4.3584	5.0951	5.40215	7.50908	7.35234
Ubd	10.3703	4.05778	11.9992	6.58312	4.10315	4.78789	5.04876	8.98018	13.2559	7.50189	9.99043	7.78663	8.08411	4.68766	6.70569	6.08142	6.29395	7.97754	6.29442	2.28147	8.18595	3.3732	4.56211	8.20722	10.903	12.514	24.7328	9.76748	4.17238	9.65939
Hist1h2ba	10.3592	8.35494	6.21243	5.60735	6.67023	3.33985	7.85236	8.87558	8.08598	8.95322	18.3763	6.2854	7.9563	5.63683	6.54572	9.28694	7.08739	7.61127	9.28553	8.48102	6.46134	8.89526	8.04754	7.6225	5.20068	6.20494	6.13491	8.18333	14.2247	8.62086
Abcb11	12.5553	4.84154	3.39334	6.4797	4.13237	8.21649	8.90086	7.02277	12.4107	9.33857	7.68419	7.75027	8.34887	7.41879	6.02258	8.79663	6.25988	6.71793	5.17276	6.21909	4.69872	8.54962	7.06911	6.66916	5.11064	23.0818	7.37774	7.53809	6.69753	3.3851
Gcnt1	6.62887	10.5981	6.15219	6.70453	7.45078	5.64738	4.89301	4.94209	6.17014	5.75528	6.1925	5.08546	5.55982	5.78229	5.45621	6.20091	6.45459	18.5368	5.80104	8.61781	7.9864	6.87134	4.28705	7.93605	3.94017	5.41292	6.5756	7.95638	12.7917	9.14911
Cenpi	7.81564	10.5325	8.02355	6.12896	10.1807	7.15148	4.49032	9.477	9.46651	6.55101	7.88047	9.1424	8.83273	5.2077	4.46181	8.99852	4.21057	8.72348	5.00701	10.2153	20.643	7.80834	6.51898	7.89368	6.2511	7.34546	23.9702	11.4896	3.03501	2.61968
Alox5	12.6662	14.5555	12.8345	6.92937	12.1425	8.22584	11.9058	6.86961	7.56476	9.11837	10.275	9.56316	19.5918	8.17158	8.20593	7.28864	6.28909	4.46224	7.67048	9.63886	9.4022	7.35025	8.36976	6.88949	8.46772	6.15063	9.51184	21.7199	5.07142	6.42162
Bard1	7.30174	7.0461	4.10012	7.45548	5.82288	8.61354	7.27873	8.53565	6.95432	5.38995	6.56542	21.36	10.864	2.56748	10.0261	6.0773	7.68125	4.89551	4.47509	11.2022	6.19053	10.5277	6.70759	8.87668	7.12575	12.6814	6.7687	7.07976	2.64583	19.962
Gucy1b2	7.57533	7.83758	5.16832	5.27909	3.84853	5.65672	15.2754	13.0631	3.28698	5.40496	5.50063	6.37371	5.87479	6.7751	4.54828	5.05961	8.65966	6.843	4.92607	8.44194	7.92939	5.01816	6.24392	3.39814	8.37768	5.00559	5.15947	7.54254	8.25426	7.29485
Adrb3	5.43102	7.35883	5.58596	5.77372	5.58913	6.4041	6.37079	11.1132	8.94059	6.57103	8.27302	11.0176	9.84153	10.0336	10.9513	6.24211	7.61797	8.49121	13.9341	9.43856	9.25017	7.07124	5.26941	10.9656	10.9716	8.38188	9.01669	8.01423	5.07142	15.7396
Icos	9.23162	3.36668	3.75878	7.21715	9.25817	15.0503	4.98038	24.3593	13.2559	5.09968	11.5312	6.92953	5.05314	4.7313	5.77182	6.86014	5.91914	4.49798	2.55169	6.67832	8.93185	4.19777	3.87052	4.36419	6.19966	5.49439	8.18979	6.93291	3.45436	5.98321
Pitx2	19.8681	14.1694	10.18	7.06427	15.4776	8.41735	5.09435	5.39035	8.89833	6.52099	11.487	9.66705	7.77371	14.874	9.6197	4.02956	7.41353	6.97253	5.51196	6.82488	9.34994	7.02126	11.2068	8.67754	11.1302	12.7357	8.39775	14.5778	13.196	10.5829
Gpr12	4.85427	3.20839	3.60216	7.19017	3.05127	15.5735	7.67002	5.33431	4.85534	8.01235	5.7656	26.061	6.48646	3.88396	4.64772	5.72296	6.08464	7.11547	4.85283	5.75009	5.47788	7.87497	5.01007	3.65236	3.87157	6.43124	5.90219	4.41873	10.2726	5.45497
Psen1	3.08707	3.99215	6.65015	6.70453	14.1669	8.0857	5.2615	7.88567	7.39571	5.36993	3.83719	4.8621	7.68698	17.1105	10.6055	7.05791	6.6639	4.99378	5.06869	6.90793	5.61091	6.04678	3.94518	6.8683	3.61432	4.96939	7.58075	5.75369	4.35943	4.35175
Birc5	22.9885	9.22363	6.4855	6.72252	10.0554	9.15539	7.68901	10.9488	8.02493	5.67521	5.84902	4.75301	8.02021	6.89148	5.40865	7.94787	6.46919	7.86141	16.9753	5.96017	6.9887	7.09206	9.59575	7.88096	8.08613	13.3784	11.7301	5.3354	5.06237	4.89078
Cd40lg	4.17031	7.99974	4.88721	6.51118	3.0471	4.88132	5.42865	8.98018	28.0474	7.74211	11.2515	8.16063	8.51776	4.7313	4.10297	8.38873	7.5839	4.27464	10.835	6.02368	7.37828	4.20609	7.82749	6.7539	5.70231	6.54438	12.7501	5.29091	9.42482	8.91912
Sepp1	23.1438	14.9068	8.09181	6.24138	9.63384	6.02574	10.2913	5.67425	8.23155	9.51373	5.80485	8.15544	5.98891	10.5972	12.391	4.33857	6.58602	6.99486	7.36598	5.87711	5.42562	9.07017	14.1107	6.08868	7.28438	13.0933	9.14543	5.51785	9.45197	13.0014
Rtn3	7.49399	5.30098	7.71031	7.36554	3.57304	6.33403	4.52451	22.1553	9.74825	6.71616	5.39758	6.30618	6.16237	6.70964	4.31914	6.37395	8.08041	5.63699	6.7878	8.3198	8.78932	19.094	6.32644	4.99551	8.22333	4.1321	6.45676	11.4896	3.7651	5.50168
Mbp	8.99501	10.8645	5.73053	17.9687	9.75907	5.87626	5.50843	5.38661	6.71014	4.81942	6.67337	8.01519	16.0678	3.1348	10.5233	6.98786	5.79745	3.13116	5.24214	6.81022	7.37828	10.8817	6.28321	6.64798	7.94894	4.68878	7.98677	10.4216	10.2967	8.18245
Lmnb1	4.15552	10.2661	10.2764	7.71628	7.48	6.29667	4.74105	3.04818	7.09519	6.92636	7.31127	7.6256	9.88717	9.11712	23.7747	9.2787	7.99279	6.61966	6.89958	9.10147	7.80112	13.1263	12.4957	10.4571	8.81071	10.6403	9.34844	12.3796	13.3981	12.1389
Aldh6a1	3.78212	4.60603	7.3248	7.424	4.52891	8.51077	11.1004	4.69928	5.59257	7.87223	5.52516	11.1943	6.29018	4.41855	5.04548	5.63232	7.24803	11.5375	9.69025	8.35889	11.9345	4.38517	21.8635	8.35975	9.36808	10.328	7.45696	7.11981	5.37613	11.6718
Mpz	13.0248	13.9918	8.43717	17.9687	15.9868	8.35663	8.59695	5.52483	6.15135	5.61515	6.50654	8.92423	20.2993	3.94578	5.841	9.6454	4.70221	4.69898	7.34671	9.38482	8.08142	5.5637	8.28724	7.26235	9.77968	6.69374	9.13057	10.7376	11.4914	9.51924
Itgb1	6.71391	6.90711	12.4851	4.46519	4.25342	5.03546	5.07535	5.13633	5.90718	5.11469	6.4771	24.1546	7.45418	4.49128	8.14973	4.70939	7.61311	10.9122	11.5366	6.33634	2.70331	4.35185	5.24583	9.47411	5.07634	5.36766	7.43221	4.20069	3.57503	3.85944
Nfyc	4.92822	10.5054	4.30091	6.08849	8.35657	8.59953	6.85705	6.63054	6.36266	6.07558	8.47911	7.81779	10.3847	21.3727	9.76238	7.63062	6.20634	4.92231	5.24214	7.63585	5.94823	12.8598	4.85682	7.46149	4.00019	12.2243	9.18504	13.2695	14.0829	3.87382
Fstl1	10.9803	11.2583	10.8145	4.68103	9.32913	7.33365	5.78575	6.04033	4.41395	6.9714	6.84511	4.93482	7.43136	16.1904	7.17262	7.52761	6.01163	4.92231	6.22119	7.00075	5.44463	5.74694	7.77641	4.00828	5.91668	7.64417	7.60551	8.88641	13.389	3.24136
Cald1	14.548	25.366	10.674	7.20366	14.9809	11.3275	9.16299	8.12474	7.1938	6.94137	7.5468	7.15289	25.4529	9.6517	14.1377	9.17157	7.10686	6.82513	7.31201	9.56069	11.2028	13.472	9.65862	8.56737	10.0755	14.3741	7.8927	14.5333	10.529	9.66657
Comt	4.6916	14.9261	11.947	5.95359	13.4865	11.7899	7.7156	3.91482	5.64892	7.50689	8.17979	11.6773	6.5458	6.626	18.3055	7.404	5.94835	13.6235	7.92103	5.40323	8.38549	11.0275	8.87273	8.40213	4.54041	9.0336	5.62986	15.2408	19.7547	9.84984
Mark3	9.05786	8.57501	3.98768	6.96984	6.24864	6.37607	4.97278	7.28425	5.53622	6.60106	6.53598	6.71655	11.9596	10.2008	14.9289	10.284	7.93924	11.332	10.7657	6.62946	5.53965	13.5553	10.0044	22.1133	13.1711	9.73511	7.47182	10.1991	16.7469	7.00018
Stat1	20.3968	11.351	14.0673	5.37802	11.8753	5.02612	8.04611	21.1281	9.18007	9.10336	5.95697	7.34509	8.69578	5.68047	5.60753	3.222	5.7147	9.47835	8.35273	10.6501	6.73214	10.1196	4.84503	7.49115	7.30153	5.19568	5.98637	7.95193	13.0964	14.216
Acan	9.86752	3.05009	10.678	8.75052	3.57304	13.1772	11.1194	10.1083	9.67312	14.2231	6.89418	12.8149	10.5217	8.40069	5.03251	11.3388	9.96421	7.28967	7.68976	23.9384	6.54211	7.85832	6.08674	10.6308	6.18679	4.12305	7.32822	7.61819	3.44832	7.44937
Tmem176b	10.4036	14.9261	14.3083	6.63708	10.1264	6.63766	6.87604	4.96823	7.35815	9.52875	7.5468	10.5449	6.29474	4.92041	8.65989	16.9629	7.38432	11.877	10.7657	8.39797	7.58257	6.97545	6.50719	6.87254	4.87912	7.13274	4.96141	11.4495	16.7559	12.5306
LOC100910779 /// Yme1l1	20.1269	12.517	11.8827	5.97607	3.94871	6.60496	8.72611	6.21963	6.18422	8.09243	7.27692	8.39439	4.64232	8.29887	8.0892	6.0567	9.32654	6.51246	5.69312	9.06238	11.9345	11.9603	23.231	8.11824	7.96609	10.3189	6.15967	4.55668	11.4914	8.52383
Hspa13	22.9885	10.49	8.24843	7.23064	9.40009	6.31068	5.09815	4.57227	5.4517	5.75028	5.88827	8.46711	4.55559	3.53484	4.58287	8.19508	7.36972	5.32432	6.88802	9.03796	6.00049	8.02906	4.6682	5.8048	21.5144	5.27262	5.78336	7.3779	8.80937	7.84825
Camkv	8.78058	2.64856	5.27273	14.7266	5.61	6.50219	8.03091	7.92676	8.18928	12.2162	9.88739	7.82299	2.81643	5.3168	4.4402	6.75301	6.513	5.51638	4.62927	6.55618	7.35452	5.53039	5.76059	15.2874	5.5351	4.22262	7.22919	5.4244	3.76812	3.39228
Rab10	4.99476	6.91483	5.48958	8.79548	10.1139	6.56292	9.55048	8.21813	9.72477	13.4674	7.10518	7.5217	6.74209	3.42937	6.37711	8.67303	6.56168	7.33433	15.5877	6.80045	5.66317	7.17118	4.38528	4.43198	5.61227	9.44998	4.4514	5.23751	16.3788	4.41644
Dnaja1	12.718	14.3972	10.7342	7.37903	10.3059	5.82021	4.87781	6.01418	6.89797	7.02144	6.78133	6.93472	10.088	12.0628	22.3609	10.6095	7.18475	8.32148	7.1694	8.01691	7.79636	13.4512	10.0948	12.7494	8.52774	13.0797	9.71485	13.7457	19.4862	7.15829
Vsnl1	4.06679	13.4243	5.52171	5.21614	3.6273	8.0857	21.0916	4.67313	4.88352	10.2144	4.79403	5.06988	5.82914	7.27333	4.02082	9.17157	6.37184	8.25894	7.8555	7.49906	8.70855	5.5179	4.64856	5.72006	4.11595	3.92391	2.6342	6.85281	4.60682	4.80454
Jak2	8.03377	5.96505	5.22856	18.4903	6.29456	6.91792	4.26998	5.04294	5.93066	7.5219	24.3774	11.9371	8.10237	3.46574	5.7675	5.69	6.13819	10.4208	9.53607	4.70462	10.9225	5.30551	8.5623	4.27521	6.44404	3.44417	7.35793	11.4495	3.56297	10.1337
Ppm1a	5.18701	6.65229	5.08399	6.8799	12.1133	7.21688	6.26442	5.61074	7.63989	6.4309	7.44376	9.8125	8.79621	21.3727	9.76238	9.08093	22.1481	7.88374	5.44643	7.92409	5.65367	10.6069	6.83727	7.88944	6.20823	12.2832	5.4417	9.56724	3.29145	3.31323
Akt1	8.58833	7.65226	24.6529	6.77198	13.5951	3.91907	8.30823	4.96076	6.89327	9.57879	7.3309	7.88532	7.77828	12.7938	6.92619	7.69654	8.15829	4.86871	7.12314	9.292	7.5018	6.30914	8.39333	4.87264	7.40872	3.77004	7.14997	7.41795	10.9001	11.625
Akap12	9.3869	6.23145	4.79887	6.6191	7.31304	7.343	5.18552	6.7426	11.3683	6.02053	7.46829	12.5448	12.5667	6.06959	11.5566	6.12262	9.07829	9.09868	5.29996	9.20406	5.88647	14.13	10.1105	18.444	11.5633	7.89309	7.25395	8.58382	5.81056	10.7554
Id2	8.58094	11.0846	6.64211	5.36003	15.2021	7.84748	21.0916	9.02127	11.7064	13.5074	9.15626	6.71655	9.49461	22.0673	12.4083	6.32451	8.29945	8.05347	8.22168	6.87373	9.6635	10.99	4.6407	4.66502	6.7656	11.0521	7.33318	15.2408	3.10138	3.58633
Idi1	10.3592	13.1424	5.75061	9.80723	10.8068	8.99657	21.1752	10.9488	10.0863	10.6097	5.92262	7.81779	6.41343	5.66592	5.68535	5.82597	8.75215	26.4965	6.39079	11.0507	9.02212	7.3336	10.193	8.91905	5.68516	7.20063	10.6012	4.88152	3.07423	5.10639
Map3k12	5.69721	6.21601	5.64218	7.91414	6.1902	6.24061	6.95962	11.8528	5.15117	8.87815	7.22295	5.21533	9.49461	22.0673	14.1377	5.55403	9.45797	10.4253	7.97885	6.26794	9.87254	14.13	13.0183	6.46578	11.5461	8.27778	7.08065	3.27066	7.3522	5.0453
Cdh22	5.39405	6.60596	19.332	7.4195	7.2546	7.29161	5.48944	9.44712	9.5839	7.49188	7.06102	7.94246	7.67785	9.05893	12.2181	6.57996	6.41565	8.75475	9.61701	10.8846	11.9345	11.294	23.231	11.7155	8.86645	8.98382	7.70949	10.1546	13.0964	8.90834
Rtn4	11.5312	13.7022	13.742	6.73601	7.78471	5.46988	11.3436	10.5678	6.67727	8.53784	6.41331	6.34254	9.45809	9.17894	11.3448	15.1047	9.46284	5.86032	4.87596	8.08042	7.08372	8.78282	5.39122	10.0588	6.9714	5.63921	5.70413	12.206	19.6853	9.84265
Gnpat	11.9786	13.9918	11.5093	8.72803	7.03337	10.2578	11.1194	4.86738	6.84162	7.5219	6.81077	8.24375	5.72872	5.11315	10.0088	7.08263	6.76612	17.3264	7.2118	7.32807	8.00541	5.5179	9.90225	8.8682	10.5214	10.595	7.47182	5.68694	13.389	5.90775
Cap2	13.9195	15.2813	5.07596	7.33407	14.0459	7.57655	5.19312	2.98094	8.41937	7.7371	9.87757	9.70861	8.32604	15.634	9.80994	9.09329	9.20972	6.53479	7.6011	8.2221	8.23821	8.5871	7.72533	10.2241	9.12799	11.2377	8.56115	13.2206	19.6853	9.84984
Bmpr1a	8.21862	7.57504	9.22828	4.94634	8.26056	4.32078	4.9272	13.1826	6.28753	5.42498	7.84121	9.20474	24.8686	6.12414	6.82675	6.53052	9.29247	6.19979	6.1017	10.572	6.85567	10.0072	11.3483	10.1054	4.90056	7.34093	8.93251	8.69506	7.47288	2.84966
Thbd	4.45499	7.56732	6.64613	6.29534	5.91054	6.46015	4.5701	5.73401	6.24057	5.94546	7.88047	6.18151	6.74665	18.1033	7.1121	8.90788	6.79046	13.0383	22.4718	7.22059	5.19758	3.16915	5.85883	7.02084	5.34645	9.06981	7.37279	5.51785	3.65046	5.09202
Pak3	5.53084	23.6633	7.0718	8.62911	5.78949	5.2877	6.34799	4.92714	6.02457	6.28577	8.38097	9.37616	6.65992	5.12406	5.4173	9.82668	9.79384	9.47389	4.51749	7.67982	6.64663	9.38251	14.4408	11.2494	25.103	9.1739	5.52588	8.73956	5.4787	8.0998
Strbp	9.08374	11.073	9.25639	6.50668	21.5342	9.06197	7.7308	4.84123	5.16996	5.14973	5.88336	3.02842	4.23149	9.06257	5.91882	9.72368	8.04633	6.37399	7.41609	5.56445	4.94577	7.24614	17.3447	10.3766	8.81929	9.77132	7.86794	7.4313	4.36245	6.83847
Ces2c /// LOC100910040	22.8073	15.0149	14.0673	7.70279	9.58375	6.22193	5.03357	6.53715	6.59745	8.86314	9.31328	9.86445	9.79132	9.33895	11.9155	10.4159	8.56231	13.1455	12.2651	11.168	10.5092	10.2737	21.6121	5.87259	9.87829	6.7752	7.68473	8.30792	9.97088	8.13214
Pdp1	6.69172	4.60603	3.40539	16.1565	8.18125	7.9409	8.32343	7.59804	10.1803	7.93729	5.53988	6.3841	8.79621	9.63352	4.82931	8.38873	8.27998	8.48228	5.9321	4.81699	6.32831	3.45233	6.36573	9.55461	6.36687	10.0881	5.44665	11.3605	6.35361	20.4974
Kmo	4.22577	5.76429	6.35699	9.34857	4.29516	4.97474	5.64519	7.20954	27.1693	5.94045	6.68809	12.3734	9.03814	4.68039	8.83283	4.87832	8.61585	7.20033	6.24431	6.27283	4.23313	5.48042	8.13399	5.52515	9.74967	3.81077	7.18958	6.06518	13.0089	5.437
Slit3	10.215	7.65612	3.4857	8.12548	8.70302	6.6143	5.10195	4.31078	5.41883	6.45092	22.5619	8.06194	8.40364	5.54228	21.7297	7.7295	6.58115	8.19641	4.60229	6.16047	3.43971	4.57673	5.13974	7.46997	6.80419	12.2017	5.81802	13.2206	9.37353	12.5378
Arhgef7	12.522	4.12342	23.388	7.35655	14.5969	3.494	5.43245	5.25213	6.01518	6.56102	18.3763	8.0983	10.9142	9.04075	6.46358	5.45103	7.17988	6.58393	7.2542	5.27133	5.17382	9.70733	8.62517	6.78356	7.10002	11.5907	5.97151	11.5074	7.81982	4.50628
Sema4f	3.12034	4.12728	5.06793	5.49943	5.0465	8.21182	7.11157	4.57974	4.72386	7.21162	5.70181	8.03077	7.31724	5.535	8.87607	4.84948	19.9771	8.11601	8.30648	6.2484	4.64646	8.85778	7.26951	5.75395	5.33788	6.77973	22.158	8.20558	3.8194	5.19983
Esyt1	1.94467	5.06161	11.3004	5.75124	13.2152	6.23127	4.73345	5.47253	6.70545	5.38494	6.08945	12.0046	8.93771	15.3213	8.54748	20.0201	7.71046	10.3494	11.498	6.67832	5.89597	10.1987	4.09843	5.0167	6.33685	5.77951	8.81367	7.84959	11.1807	8.96224
Kcnn4	3.21646	3.57903	3.72665	6.42574	14.5593	7.86149	5.59581	24.3593	12.3168	5.6652	8.95508	6.82044	6.87446	8.01157	4.85525	6.41516	5.52486	5.51192	6.33682	6.12138	5.18332	7.22948	7.79999	4.10149	4.21457	4.65258	8.18979	4.50328	3.64141	4.95187
Camk2a	11.4203	8.29702	5.95943	6.74051	14.0793	7.16549	4.9196	7.97532	5.17465	8.48779	9.76472	9.31382	7.00227	10.8627	9.72347	4.20673	9.73543	7.81227	6.41777	5.96994	7.73935	4.55174	9.91011	8.2962	18.7447	12.9258	9.79902	9.2068	16.2611	10.4536
Txnl1	11.3944	7.89935	11.4691	17.9822	5.36373	9.1694	5.18552	12.4804	13.0775	9.44867	3.89607	9.70342	9.13856	4.60402	19.836	7.42873	7.96358	5.51638	5.37319	7.38181	8.65154	9.67402	6.79797	10.9062	8.24906	4.59827	11.3587	4.82367	9.16536	4.69673
P2ry2	22.8073	9.55953	11.5052	5.74674	11.4454	6.08646	5.51223	12.8838	6.39083	4.94454	7.08555	6.99186	8.97423	9.3135	9.81426	5.97017	9.94961	8.68328	7.20794	8.43217	7.16448	10.053	2.78992	8.28349	7.7217	9.58576	5.93685	5.55345	12.4719	13.6985
Ptger4	12.522	6.7102	11.7422	17.9687	11.2158	7.50181	4.28518	21.9574	10.7109	5.63017	5.53007	7.74507	11.3479	7.86974	6.2474	9.46411	5.34475	8.45101	7.78612	8.10485	9.6635	11.1191	11.419	5.45736	11.6876	9.37304	5.83782	13.2918	12.8792	14.331
Hes5	8.52548	10.8993	9.62585	3.56136	10.0012	3.05491	4.19401	14.6582	6.03866	6.27576	6.26119	6.97628	21.372	4.5131	5.72859	6.98786	7.2675	5.68165	6.22119	7.1864	5.36861	7.00877	6.21248	6.27935	6.14392	8.18727	6.12006	8.00533	2.62169	10.6224
Rnase4	6.54754	13.5633	12.6538	7.61286	5.66009	12.4018	7.96633	10.0149	8.71051	9.30854	9.17589	7.20484	23.0107	8.94256	11.1675	5.64056	8.81056	7.26733	8.01739	10.7674	10.5852	7.46269	10.4249	10.5927	7.24579	13.9713	8.8929	11.9168	11.241	6.47193
Msn	9.1281	10.9958	4.10012	6.30883	3.86105	5.28303	2.70483	21.9574	9.43834	4.62925	10.5106	9.76575	5.59178	18.3433	6.56734	9.84729	5.08189	14.1729	9.83287	4.77302	5.04079	4.33519	6.3618	5.11415	9.40238	6.67563	10.6705	7.47135	10.879	15.1144
Ebf1	8.72142	7.35497	5.14423	6.56963	7.07929	6.28265	11.089	11.2252	11.218	7.0765	9.67148	10.8514	9.40788	6.3387	8.79392	7.02495	7.34538	8.08028	21.512	7.96317	7.54456	10.9109	8.00432	8.79617	7.76029	8.38188	11.844	6.08743	9.63298	5.10639
Uggt1	4.19619	3.30491	5.66628	5.65681	9.76324	4.70381	5.20832	5.99924	27.2585	4.38402	7.72345	6.71655	4.2817	7.33151	8.05893	6.28743	6.90729	4.82851	3.94702	5.76964	5.37336	4.66835	5.5209	23.3251	7.31439	7.23684	6.73404	4.17844	4.7818	4.20083
Cask /// LOC100910506	10.3186	5.50175	8.7504	5.69728	4.42038	12.257	11.6247	5.09524	5.48926	12.1512	6.74698	6.93472	19.7378	9.85536	13.3033	4.80004	7.69099	8.44655	6.52569	8.71552	7.48755	6.95463	3.29289	6.4446	9.47956	21.8553	7.61541	9.19345	3.64141	7.60389
Pacsin1	6.99119	7.51713	7.95528	5.66131	3.18067	5.6287	5.05636	24.3593	8.41468	4.48412	8.67048	8.51386	9.18421	3.34573	10.5579	5.12553	5.69523	6.7358	7.20023	9.18452	5.23558	5.25137	3.72906	19.5372	5.29929	8.97024	12.7501	7.23105	4.86627	8.13933
Lgals8	5.16853	8.17734	8.13599	6.18742	3.35181	11.9534	8.05371	5.34179	5.74283	25.5635	5.34361	4.91924	4.67427	10.3027	7.91194	5.36038	9.44823	3.4215	5.23443	8.67155	5.43988	8.13317	8.26759	6.87678	6.5941	7.89309	9.393	5.70029	8.90893	13.0553
Mmp23	11.3981	11.7409	8.53757	4.9913	6.62431	6.20791	7.90555	5.39035	14.4346	7.82718	6.57524	7.40223	10.5399	3.93487	9.58944	6.547	6.11385	28.7924	11.2089	7.32807	5.60141	7.43354	11.3011	13.3129	12.618	7.20063	5.47141	5.64245	9.21363	6.13414
Mxi1	7.53836	4.8454	5.51368	5.78721	10.0888	8.25853	7.3851	4.86738	5.0103	5.7753	7.01686	5.44389	6.42256	6.89148	7.50985	6.88486	7.54496	9.81782	10.2376	8.05599	6.89843	3.83962	6.00815	6.46578	23.581	6.92908	5.09014	13.2918	15.881	6.74504
Slc16a3	14.1229	14.1269	13.9629	7.54091	9.2373	8.74433	4.9158	4.80014	8.35833	10.3295	10.1916	6.79966	6.25366	8.5898	7.61794	14.2559	8.69861	5.72632	6.82249	6.55618	9.34519	6.97545	11.3169	9.1648	6.27683	12.7357	7.42725	15.1296	9.87735	23.1207
Mybph	14.1524	15.6134	10.9832	7.11373	14.7638	10.2438	4.68407	5.70413	6.84632	8.45276	10.2211	8.73203	11.7359	13.212	23.7747	9.17157	7.36972	6.6688	7.38911	9.65351	9.75852	6.22585	6.70367	9.02498	8.66923	14.2112	8.75921	8.61052	12.4055	23.7604
Synj2	12.9694	9.35876	13.9629	7.14521	14.1127	6.60963	12.3731	4.4602	6.84632	5.80032	5.34361	9.46966	10.6084	6.26961	8.05461	8.18272	5.5784	6.09706	8.1523	3.75686	6.91743	7.53765	9.19495	9.09701	10.4099	14.0437	8.51163	13.1805	8.96021	23.7604
Ntrk2	8.39238	4.69869	8.11189	6.39876	5.30529	7.14681	4.77144	4.44153	5.96822	7.10152	6.53107	6.31657	7.00227	8.13158	8.72042	6.53052	7.31131	17.7194	6.78395	8.90605	5.71068	4.39766	9.52502	6.05902	8.14616	6.19589	8.48688	9.42484	16.7469	6.42881
Cd38	7.66776	7.54415	3.89933	6.99682	5.9648	8.80505	7.42309	24.3593	8.76685	5.01961	8.1896	6.3789	9.27094	17.8669	6.8916	7.94787	5.84613	4.73024	8.36815	5.94062	6.18103	5.63866	4.66034	4.02522	4.79766	7.20968	11.6905	4.48993	9.5998	5.85385
Plce1	4.6879	6.87622	6.60999	8.05353	9.4794	5.55396	4.96519	9.27528	10.2178	7.32673	7.88538	10.6644	12.7903	10.2445	8.24917	8.68127	9.0004	11.3946	12.2535	11.3585	9.9058	12.2268	23.062	8.68177	13.4369	9.87541	20.6676	6.25653	7.09275	8.13933
Aqp4	12.8104	8.24297	11.441	8.81797	12.7143	6.84786	7.77638	9.90658	9.77643	9.45368	9.9659	7.27756	9.37593	9.85536	6.73163	5.77652	8.40654	9.16122	11.6792	8.34423	10.3239	8.48298	13.2502	6.83441	5.77949	14.9172	7.05589	15.1296	19.7547	9.55517
Pkia	12.9398	10.6058	8.0637	17.519	7.90994	7.58589	8.48298	6.13745	6.92145	8.92319	7.36034	8.2853	7.77371	9.69534	7.81682	8.8502	7.38432	10.5459	11.7794	5.8136	7.54456	5.96349	2.92745	10.4698	9.37237	13.9442	7.37279	7.71609	16.3788	11.2369
Hbegf	14.4926	15.0343	9.33671	7.11373	15.9868	6.57226	16.0048	5.37914	8.1705	5.89541	6.36424	6.75811	3.79328	8.1934	5.35677	8.5659	9.59427	6.94126	4.87211	7.20105	6.48034	8.68704	7.19485	6.60984	7.19863	5.12327	7.60056	12.206	15.7302	9.11317
Casq2	9.23532	16.123	14.3083	7.46447	15.4776	7.27293	4.68407	8.41238	8.64477	6.37585	11.2417	7.68274	9.78219	9.92445	11.842	7.09087	9.17564	10.4253	8.37586	6.80534	10.1671	5.15975	7.36774	12.7451	26.9338	12.5683	9.66038	13.274	19.0789	14.2232
Timp3	7.77867	9.28155	9.58167	19.7044	10.2683	4.51697	8.69192	4.52371	6.61153	9.66887	8.29265	6.52435	11.43	18.3615	10.6184	3.86475	7.81755	4.19424	6.24817	5.36415	10.7752	12.8598	6.61722	6.77932	5.73232	10.3733	5.17432	9.70964	3.83751	3.11558
Cyp1b1	11.0136	21.451	6.87101	8.26038	11.4078	8.85644	21.0916	10.8517	8.36302	13.5074	7.35052	9.3398	13.0049	10.1827	9.88343	6.32451	7.48168	10.059	10.438	10.4352	8.50901	11.0358	9.1085	11.0503	7.73456	12.0433	12.3094	11.3383	13.567	10.5829
Smpd3	9.77509	6.81831	6.78668	7.11373	3.4186	9.3796	21.179	3.51885	5.61135	5.85037	6.50163	8.27491	9.30289	12.2156	11.6388	5.38511	6.64443	27.7204	10.7117	6.41939	5.56815	13.9051	8.96704	4.9023	7.40014	5.54417	7.97192	7.4402	5.66575	7.86262
Srsf5	14.3854	14.5015	10.3607	7.29809	7.78471	7.88017	7.44968	4.85243	6.7571	8.21754	6.00113	5.30883	5.23573	5.32771	6.63651	9.98737	6.24041	6.45886	7.84779	12.404	8.2287	12.4975	22.1465	10.508	9.97261	8.2461	5.90219	14.1239	19.7547	14.2663
Soat1	9.49781	4.54425	7.11196	4.95533	7.6094	8.85644	21.0916	7.65033	6.69136	10.2144	7.82649	5.08027	5.71046	15.2449	4.61313	9.17157	7.97818	7.1244	4.398	8.36866	4.96003	2.98591	4.58961	7.3132	9.50528	4.48059	9.03649	7.54699	4.80292	3.27729
Hk2	11.8455	16.2775	25.693	6.89339	10.1264	7.53918	7.69661	11.9163	9.83747	9.54876	8.77843	8.72684	9.49461	12.3574	25.102	8.06324	6.69798	8.33934	6.69915	11.593	10.0151	10.4861	8.79414	8.23688	10.157	7.11917	10.0317	4.86817	10.5803	5.20342
Nr4a2	11.1911	9.18116	4.63422	7.18568	8.32317	6.05377	19.3859	7.19834	5.49396	6.46093	5.36323	5.84387	4.01239	7.28424	4.88984	4.59815	6.8148	4.51584	5.80875	8.1879	19.6738	6.75057	5.08473	8.03774	3.32278	5.38576	7.58075	3.95594	2.54929	4.36613
Olfm1	14.0748	13.7216	8.87891	6.8799	9.75072	6.62364	4.69546	5.06909	7.04823	6.23072	6.99232	5.21013	7.3218	7.14604	6.86998	5.11729	5.52972	22.9097	5.53123	7.81661	9.81078	5.43461	9.28925	12.2621	9.79254	9.58576	9.69999	5.6113	9.69936	18.6504
Apoa5	13.5831	5.1118	3.56602	5.88164	6.39891	5.19428	8.30823	9.56292	7.67276	8.13747	6.27592	4.96079	9.82327	3.77122	5.91882	4.30149	6.1966	4.50691	7.92874	6.86885	3.31144	5.18474	15.5371	5.52939	3.35707	4.59827	6.03588	4.66792	3.25826	4.1038
Mrpl17	8.90998	6.02297	11.3004	17.8158	11.8336	9.51506	11.9362	4.67686	6.2077	11.8008	6.58505	6.67499	10.1976	8.05521	21.3622	5.49223	5.79745	10.0144	8.69193	9.13566	6.72264	6.65479	7.40311	5.66921	7.91035	10.9254	9.14543	8.53487	6.9057	10.1373
Nf1	5.13155	10.2931	8.38095	7.34306	4.60404	4.62441	6.70509	7.72878	19.0551	5.3349	4.58794	9.17357	9.95108	13.9721	4.73419	6.86014	8.0366	6.38293	6.09399	4.2112	4.95053	9.10349	3.48936	4.54215	7.82031	5.03727	7.67483	3.02147	8.52276	9.24254
Cd5 /// LOC100911215	5.82291	3.5134	3.52586	17.9372	3.86522	5.16158	7.61683	24.3593	9.43834	7.4118	11.5312	10.3631	9.86892	9.08439	7.14236	7.14855	7.85649	5.00718	7.22336	9.8245	7.79161	6.32163	3.9609	5.60989	5.6037	8.97024	12.7501	7.15985	2.43163	10.3026
Plscr1	11.2502	6.15038	10.4531	8.61562	9.10791	6.14252	7.24074	21.9574	7.6258	7.78214	9.64695	6.14515	10.613	5.59319	7.99408	6.88074	7.10686	7.97307	9.84058	11.5002	11.2503	5.94683	8.29903	6.05478	10.1055	3.89676	5.28325	4.67237	16.3788	5.22139
Itgad	10.7511	11.0653	6.49755	5.18016	4.57065	5.57264	14.1624	21.9574	7.58824	5.50005	9.89229	6.58149	4.27714	3.64757	6.99969	5.01017	6.55194	5.36898	5.2036	4.24051	10.0721	7.5085	10.0123	6.20308	7.03142	5.12779	4.89704	4.75247	6.9057	7.14033
Pi4kb	4.04831	11.6212	3.57405	7.03279	9.64219	10.141	7.76119	12.1852	10.2883	7.53692	8.48402	6.72174	7.3355	6.95694	20.7742	9.92969	10.4899	7.99987	20.9531	5.0124	9.4212	6.67978	4.75858	9.16056	6.36687	4.09137	8.74931	9.02435	5.48172	7.23016
Rere	13.3982	10.2815	13.742	6.98333	7.78471	6.68904	5.34508	7.78481	6.01048	6.36084	7.21313	8.80476	7.64133	5.58592	8.28375	10.5148	6.64443	8.19194	6.71842	9.71702	9.65875	20.4808	7.90608	10.9825	9.42382	6.62585	11.0072	10.8577	16.3788	11.3555
Stxbp2	3.19428	5.24693	5.43738	5.43198	24.3768	6.39943	4.11803	5.23719	14.2702	6.536	4.86273	4.56081	11.2338	8.66617	12.685	4.84124	5.56867	9.83569	10.4033	12.0767	5.67743	7.35025	8.75092	6.71577	6.60696	8.59459	6.80336	8.98875	6.85441	11.5065
Trpm7	4.25165	6.71406	11.188	6.70903	4.77101	12.3271	11.4879	8.91667	8.83259	12.2212	8.90601	6.18151	6.0939	6.77874	8.24484	9.46411	18.5801	10.0144	10.3455	10.9188	11.7967	8.97439	20.1739	10.1181	5.88238	8.33662	4.81781	10.7287	13.0964	13.9033
Gsr	3.9263	8.67153	7.20834	6.32232	7.72628	6.8572	7.87896	4.62083	6.26405	6.43591	6.50163	8.93982	25.2246	8.08794	9.76238	16.5344	6.95596	7.73187	6.703	8.93536	6.53735	10.1987	5.03757	10.9062	10.6972	10.3733	9.5663	8.17888	4.27194	8.43399
Madcam1	7.81564	6.1774	10.2925	8.13897	4.64996	4.55901	14.4891	5.26708	5.80857	5.1197	5.93243	12.2799	5.90674	7.20787	8.37022	4.58991	6.01163	9.23715	23.235	10.3472	7.14073	7.45436	4.58175	9.44021	4.57042	6.10085	6.94201	8.18333	4.40167	6.08024
Atp2a2	14.378	15.0149	15.4005	6.58312	11.9588	7.04871	5.70218	5.97682	9.90791	6.78122	10.8344	8.50347	7.3355	6.73146	6.29496	7.86959	8.93712	12.0958	11.1665	8.52011	8.89384	4.99318	19.4194	7.70724	8.52345	14.9172	8.49678	10.6931	19.6853	10.5829
Cul5	5.4495	4.43615	7.59787	7.98159	9.39592	7.6653	7.40409	6.90697	6.34388	6.28077	7.59587	9.54238	11.357	8.97529	16.2303	8.21568	5.51512	8.89768	5.55821	4.42127	4.76524	9.08683	3.34397	6.66916	5.29072	9.21916	9.74456	4.61897	19.7547	6.88878
Akap1	14.4926	11.3162	13.6657	6.2099	10.3351	7.5205	9.58847	5.24093	3.97255	8.22255	6.69791	7.13211	10.0059	17.3651	6.63219	6.90134	6.39131	6.13279	2.51314	7.06915	7.82962	4.0062	10.3738	10.5418	10.9373	9.44545	5.53578	15.1296	16.3154	10.008
S1pr1	5.29053	4.8647	4.60611	6.85292	3.02623	7.21688	5.41346	6.86961	9.39138	5.30987	5.26019	6.74252	4.68796	4.9495	5.24868	6.22563	6.26962	5.58339	5.36163	8.86697	6.4946	12.6641	8.54265	9.16056	5.28214	8.27778	6.35278	5.93614	3.1587	16.2427
Slc38a4	6.91355	10.8143	9.18411	7.87367	12.2134	5.81554	5.32228	5.5435	5.79918	6.23572	7.99333	8.50347	5.61004	8.84073	7.95085	7.39576	6.35724	6.9234	4.98003	4.29914	5.93398	5.06814	23.062	11.9231	8.17617	9.48166	5.28325	11.3828	18.0562	10.7806
Asah1	18.9069	2.51729	8.95521	5.72876	6.5617	6.41344	5.56162	9.33131	8.19868	7.80717	6.95797	24.378	11.7952	11.1246	8.32266	9.39406	7.17501	7.245	6.03232	5.34461	4.50393	7.16702	4.6682	8.58856	8.25334	11.8758	5.61005	13.6967	7.22248	7.94528
Prph2	3.83018	3.81068	2.83916	6.03003	3.76922	4.67112	5.92631	12.6783	5.30613	17.8664	3.32197	5.86464	4.50537	4.53128	4.82066	6.78597	4.99914	5.04738	4.38258	5.8478	6.43283	7.11288	7.00623	3.92777	8.89646	6.3543	4.97131	4.62787	3.66856	3.92772
Bok	6.8544	2.89566	7.58181	9.12824	3.33929	7.17951	21.1752	3.95217	5.55031	10.6097	6.64393	8.2853	5.74241	6.54599	7.04292	6.10614	5.58327	5.48958	4.9492	8.12439	9.86304	17.4407	3.35969	4.21166	3.85871	4.96033	5.36743	5.04616	3.30653	6.76301
Flt1 /// LOC100911280	9.36472	5.57124	4.66635	6.80346	6.64101	3.6061	8.53617	8.80461	9.24581	8.34266	6.29554	5.70361	4.8249	5.73502	11.7944	7.82015	6.78073	4.42204	18.2665	10.0639	5.41612	13.7427	11.4622	7.98689	15.3019	8.79826	7.21434	10.4083	6.93587	12.5306
Chrnb1	13.4796	9.15028	10.678	8.74152	14.1001	7.0347	5.44385	5.43891	6.39083	6.37585	9.53409	6.74772	8.30322	5.91321	5.81938	6.9755	9.01988	5.38238	5.55436	7.86546	9.01262	11.2274	10.975	19.6982	9.17943	9.77132	9.66038	13.1983	16.7559	12.1641
Gucy1b3	11.4979	3.77594	5.60203	6.10198	5.4973	5.64738	7.67002	8.52071	8.16111	7.67204	6.1974	7.49054	8.98336	9.73898	12.3954	4.74647	7.91977	5.47172	4.25538	7.17663	8.06242	19.9269	9.02205	6.4912	6.43547	13.392	19.0336	10.5151	11.6543	14.0435
Prkaa1	12.1301	23.9374	8.89096	7.61736	3.73165	5.96034	8.09169	7.79228	4.96334	8.48779	7.78233	7.7139	5.39549	7.31333	5.16654	6.0361	8.97607	7.66487	4.54447	6.40962	11.963	7.02959	20.5236	5.83869	7.07001	8.23253	8.5562	6.43452	8.48958	8.51665
Pkib	9.83425	4.05006	2.48979	9.48797	3.4186	6.10515	8.4374	21.9574	9.43834	13.5624	11.8403	6.51916	5.89305	8.91346	7.49256	5.35626	20.2108	7.0976	5.70468	9.07704	8.37598	9.15346	7.11626	6.49968	3.91016	11.4685	9.26426	12.1482	2.63979	8.53821
Tcea2	10.0117	2.85319	11.1599	9.11025	5.13833	13.9433	7.65102	3.78408	21.8631	5.89041	8.21414	9.70342	8.28952	3.39664	7.53579	7.47405	19.1253	7.70954	4.70251	9.2236	7.99591	4.67668	4.11415	5.2455	6.71844	12.3284	6.97667	9.1979	7.63277	4.12536
RT1-EC2	13.938	12.7911	7.02763	9.50596	13.4865	6.12851	4.53211	14.6432	6.67727	6.76621	6.40349	6.92433	10.9142	8.18977	5.46053	7.29276	6.61036	8.89768	11.5289	8.72529	8.98411	8.60375	4.87646	6.42765	5.23498	7.64417	5.30306	11.81	15.7302	9.58033
Fabp1	15.8235	5.37048	6.21243	8.14796	5.31781	5.18961	6.31	5.91705	6.11848	6.11061	19.4362	5.17377	6.18063	4.79312	3.87382	9.90909	3.83089	11.8502	10.4843	7.03495	6.82716	11.9811	10.2009	4.61418	9.8397	5.95602	5.98637	4.41428	4.4258	3.63664
Grem1	3.81909	6.91483	4.29689	6.4797	5.93558	5.74547	6.07827	8.68134	12.3168	4.89449	8.03258	6.98147	4.02608	6.40053	4.91145	7.02083	3.61184	17.112	4.79502	8.57873	6.0385	3.9479	10.0398	8.34704	3.96589	7.55817	24.7328	7.51585	4.02455	8.06746
Gdf9	11.5127	20.5978	9.8427	8.35931	6.2069	7.12812	4.93859	5.63316	3.57812	6.69615	5.88827	8.69567	7.94717	6.61509	4.43587	8.90376	6.76612	5.33772	6.67602	7.81661	7.76311	10.4319	8.64875	5.2794	6.82134	6.72089	7.90755	7.38235	4.80292	19.8398
Rasgrp1	6.94682	10.3163	3.84311	6.37628	3.88192	5.71278	5.44385	21.9574	9.43834	6.78122	10.5106	10.0566	7.54091	7.70245	9.30841	7.17739	5.43724	9.31755	5.27683	4.48967	6.59437	4.65585	6.29107	6.91491	3.94446	6.82499	10.6705	10.3816	13.0029	6.22398
Chrne	9.98953	13.5092	8.3167	7.1542	13.7954	9.26282	4.94619	12.1852	10.7203	3.39311	7.1886	9.73458	9.74567	8.97165	7.91626	7.99319	6.17226	8.12048	6.91885	18.9015	6.54211	6.96296	5.1751	8.44026	5.32073	7.48576	10.3883	14.3331	16.2611	11.3555
Kcnd3	9.53848	12.3278	6.12809	7.32507	19.4639	3.82097	4.97658	9.05115	10.2789	6.45593	8.83241	5.16857	6.24453	16.6959	9.34733	5.69412	7.40379	7.56214	7.8979	9.26268	6.17153	8.9494	9.32855	11.313	9.32092	8.16011	8.63542	8.73066	9.17743	3.56837
Pdk4	5.94122	10.3896	4.48965	7.77474	7.49253	8.8144	7.62443	4.72543	5.58787	12.0511	9.13173	5.19455	10.3847	4.43309	7.98976	5.45103	7.19448	8.10261	15.6031	8.51522	6.54686	7.3919	5.90598	11.2452	10.3199	11.4187	8.32348	8.48592	14.4118	6.69832
Dlk1	11.6976	11.1811	8.48536	5.64332	7.63027	6.50687	5.73257	3.0183	6.10909	6.81125	5.66746	21.2093	11.8865	10.5391	12.8018	18.6357	3.91364	6.98146	5.85501	7.00564	8.53752	11.5647	6.1614	4.58452	7.83746	6.50365	7.22919	10.4661	11.6302	6.52943
Ppp3r1	12.9398	11.0151	12.8304	7.54541	7.78471	7.22155	9.62646	11.4045	13.7725	11.3554	10.2407	8.8619	10.4806	12.4556	23.1738	8.47526	7.12633	8.21874	4.57145	7.15708	9.00787	11.1357	5.4541	8.96566	10.6029	13.5278	6.28841	9.2691	16.3788	11.4669
Frk	10.5663	13.7563	7.85087	7.06876	9.76324	5.48856	5.30329	7.78108	5.97761	7.77213	6.91381	9.24629	7.44049	6.23688	10.8692	6.73653	6.11872	5.92732	7.40838	23.7039	5.94823	10.0072	13.2502	5.90649	12.8495	12.3963	9.43756	13.5499	18.6867	10.299
Pde3b	9.73812	6.42064	6.7907	6.90239	5.03398	6.6143	5.17413	7.93797	7.39571	6.08559	6.16796	9.35019	7.29442	9.68443	13.2039	11.9239	6.62983	11.265	12.4115	10.2788	8.32848	13.5553	24.4491	12.7494	10.1398	6.19589	9.393	5.72699	5.30674	16.4547
Ar	4.40323	5.42453	8.78655	8.04904	9.63802	7.86149	21.0916	8.23681	8.7199	13.5074	6.78623	8.04116	4.40952	6.90602	4.55693	6.32451	6.85374	10.6308	9.32407	9.39947	10.5947	8.28309	8.84915	7.94028	5.13637	6.38598	6.96676	6.61252	14.2247	6.77379
Slc4a7	2.98725	19.536	4.46957	8.47172	5.92723	5.05882	14.2231	5.08777	5.19343	6.59105	5.38286	6.46202	4.69709	4.1167	6.69704	3.86063	5.30581	7.30307	8.12917	4.65088	6.46609	5.58036	4.68785	6.58018	5.28214	4.96939	6.65482	5.35765	2.82986	3.7157
Abcb4	9.23532	11.212	7.08787	6.32232	6.44482	7.88952	5.66799	9.23046	9.71538	6.96139	7.68419	7.94246	5.78349	6.00777	5.68535	9.36522	8.24591	6.15959	7.94801	7.16197	5.69643	8.48298	23.1367	6.3768	6.92423	10.5633	4.80296	7.95638	11.7358	23.0381
Mst1	5.51975	10.7989	5.04383	17.5685	10.6482	6.39009	7.45348	10.8741	7.69154	7.99734	7.58606	7.82299	7.70068	5.93867	10.7179	6.35335	7.01924	5.36452	4.92222	9.48253	7.87238	10.7318	10.5703	9.70291	3.19415	9.02455	11.0617	15.6458	7.78664	7.70451
Pde1a	2.07407	6.21601	16.7177	5.44097	3.39355	18.3154	4.70306	9.3612	10.3446	6.11061	9.36726	7.01264	3.98043	5.96049	2.22658	6.76949	6.22094	4.28357	6.29057	5.54979	6.08126	4.03952	3.39113	7.79199	8.05612	5.99675	5.86258	3.5866	4.29004	4.42003
Pparg	12.3926	6.6909	5.21651	7.97259	6.33212	9.73461	9.26176	5.62568	7.44267	6.6411	8.55762	9.13201	9.59503	5.73138	6.74892	5.67352	7.1312	9.41135	9.2624	7.38181	8.59453	12.4975	22.3979	9.46139	5.58226	5.37219	9.04144	11.6097	9.08994	23.7604
Cybb	6.79524	9.3356	23.388	7.87816	7.87654	8.70229	7.54085	7.16098	28.2164	6.22071	9.84813	9.10085	8.23931	9.16803	6.36846	6.53052	10.4899	4.71684	5.60446	8.14393	8.83683	5.74278	6.26357	10.0461	7.58021	3.74741	4.86238	9.77193	12.1521	12.3402
F3	8.78797	6.84919	6.07589	8.2289	8.80737	9.05262	5.42485	5.39408	6.27814	10.94	7.74798	4.96079	6.27648	12.2774	11.1632	8.21156	7.64231	6.46333	16.4357	11.5735	9.73952	11.3939	9.28139	6.69035	8.98221	10.1424	8.59581	12.1704	8.21504	15.3911
Casp1	10.9656	13.3084	6.12809	8.86293	13.1317	8.00162	7.55225	20.9525	5.45639	12.6866	7.07574	8.50867	6.01173	5.7532	10.679	5.76828	7.4476	9.88483	9.15447	8.25141	8.53752	11.2149	14.1932	8.96142	9.11084	4.60279	5.48131	8.92201	19.4862	11.8946
Ptger3	12.2928	14.1269	6.48148	7.11373	6.06498	5.94166	4.95759	5.48	5.37657	7.01644	6.35933	13.2617	10.015	11.8155	10.5838	14.6803	6.12845	12.2924	11.895	8.79369	8.12418	10.053	10.3738	8.07163	12.4765	8.23253	9.46232	11.5029	9.33129	23.1207
Cd2	2.81348	6.63685	10.6218	8.49421	4.13654	4.90934	13.1936	21.9574	9.43834	5.58012	10.5106	5.4283	8.88294	8.2625	5.43892	6.88074	8.92739	5.12331	6.67987	8.35889	6.2808	3.72718	2.27123	5.66921	5.62942	6.72994	10.6705	4.71242	5.62653	4.7686
Cdkn2b	3.88564	3.23928	6.24054	6.3403	4.04054	4.80191	19.2491	4.98691	5.42822	5.6702	6.63412	8.63853	4.75643	4.36763	3.8695	4.88656	6.17226	4.96698	6.22504	6.06764	6.19528	12.0644	6.03566	4.44046	6.16964	1.98685	5.74374	4.48548	8.73395	7.55358
Apaf1	8.27038	12.4629	4.04791	4.8564	5.40547	8.68361	11.374	24.3593	8.10007	5.41997	6.46728	8.4827	4.27714	4.85858	6.23443	6.07318	8.17289	7.27627	8.80757	5.8136	5.07405	5.74694	4.1338	5.65226	8.12472	3.94202	8.87309	4.13839	6.27215	3.39228
Mx2	4.14813	12.405	13.3846	8.88991	11.9129	13.3874	7.82577	21.8602	8.55085	10.0192	6.80586	6.0049	7.23507	5.22225	6.82675	7.72538	4.29819	5.26625	6.0169	6.75648	6.2998	5.34715	17.0028	10.1563	7.31011	7.64869	5.65462	7.191	7.04146	5.97243
Wif1	11.3168	13.3393	6.92322	8.04904	7.45913	5.55396	7.87136	4.80387	5.15117	8.46277	5.67237	8.84631	5.97521	4.19307	7.81682	8.01379	6.03597	9.26395	6.37537	10.8162	26.5675	8.41635	8.54658	9.76646	7.50733	12.6814	19.0336	12.255	8.27236	4.08583
Hck	5.75636	12.405	9.90695	7.50944	15.3983	6.30601	5.01837	21.9574	7.81832	6.45092	7.96389	8.30089	9.4444	5.09497	6.7446	6.98374	5.76337	6.11939	7.0846	9.16498	8.54702	10.1613	4.07092	8.32586	11.3746	4.15926	5.13966	8.67281	15.7302	5.24295
Il7	6.95052	5.36662	7.87898	7.87816	5.33034	7.698	7.61303	5.98056	8.83729	12.2963	8.52818	12.0202	5.18552	3.97487	4.20673	7.41225	6.11385	12.9624	10.546	8.67644	9.58273	18.7775	7.7214	10.0546	8.90933	6.8974	5.85763	9.79863	16.3607	4.29785
Aagab	6.02995	6.47083	6.50156	7.23514	11.4037	10.6221	9.144	3.02203	8.86077	4.79941	6.68319	5.83867	4.10824	12.4083	5.16221	7.7089	7.23829	8.77261	3.22623	9.94664	18.7141	4.28105	5.43445	6.16919	3.90158	9.91162	5.95171	4.13839	3.87974	4.57815
Scn1a	11.0321	15.6134	12.6538	7.57689	15.2021	9.31888	5.86553	10.2727	10.199	9.84904	7.6891	11.4696	23.9876	10.0336	12.123	7.7501	7.93437	12.1137	11.1511	6.89816	6.00524	5.8802	6.70367	5.68192	7.31868	12.8534	8.77406	9.3492	8.68266	21.9097
Ciita	6.94682	10.8529	4.69044	7.52742	3.61895	7.92688	7.45728	24.3593	9.43834	19.4879	9.6813	7.00744	7.42679	6.42598	5.25733	8.04264	5.50052	8.50908	3.98171	4.65577	4.71773	9.21593	10.2205	4.81756	11.0831	8.41809	11.0617	7.54699	6.2631	6.24195
Dnm1l	12.2632	10.7834	9.5134	5.6748	25.917	8.20248	10.9333	4.96823	5.60665	9.35359	7.80687	8.47231	8.59536	10.9354	11.6085	11.1575	8.53797	27.0013	8.91164	6.60015	10.5947	4.49344	5.30478	7.88944	6.71844	6.8974	4.77325	6.98186	3.15568	4.10021
Ppp2r2a	4.83949	4.59444	8.18819	6.79896	13.3488	9.47302	8.4374	4.40791	6.9731	6.73118	6.74207	10.2125	6.13041	5.6441	5.46486	6.22563	16.2241	11.2025	10.7078	4.70951	9.02212	6.92964	7.79999	10.1139	5.71946	27.6168	5.4417	9.46934	10.8005	13.9465
Kng2	12.4555	3.61764	3.72665	4.47419	6.91232	4.90934	4.58909	4.02688	5.68179	5.63017	16.9386	4.7634	4.04434	4.74221	7.18992	8.24865	8.61099	7.6068	5.2961	2.87749	6.49935	7.49185	4.5739	6.30477	4.48039	4.54848	5.00597	5.12626	4.24479	1.9944
Gabrr2	6.28135	8.69855	7.63401	7.57689	4.16993	9.44967	5.79335	5.53603	5.87431	8.09243	17.6059	6.72694	4.53733	10.059	10.078	8.37637	9.59913	10.5638	18.3436	6.9861	7.60633	6.45906	6.64472	4.47859	9.14513	7.93835	9.66533	6.64367	6.51954	6.85644
Unc5b	10.5108	6.8878	19.3922	7.06876	3.38103	3.40524	4.64988	6.76502	5.35778	7.0865	5.75578	8.0048	9.02901	7.23332	6.80945	8.0756	5.42263	13.9227	23.235	8.52011	6.79391	3.48148	6.75868	6.48697	8.15045	6.15063	8.57105	10.7554	10.9846	12.527
Arnt	4.3071	3.89562	3.76681	5.60285	4.31185	7.19819	21.0916	4.60589	6.46597	6.56603	6.61449	8.00999	7.93804	20.889	5.98367	7.37516	8.81543	5.08758	5.49654	7.10823	7.41629	12.0144	4.86075	6.31325	6.02387	9.86183	10.0169	7.76949	7.57847	9.14192
Xiap	5.22398	5.28554	12.1558	5.52191	8.5277	13.2286	10.9903	10.1419	27.6952	12.3714	7.20332	5.06468	3.95304	4.444	8.03299	7.00435	5.78771	4.53818	7.67434	3.9425	4.65596	10.94	3.17108	19.6897	7.5845	5.05538	7.5758	7.67159	8.387	3.03293
Ankh	8.54396	12.6096	4.89525	18.6387	11.245	6.23594	6.14665	11.6585	9.49938	6.80124	10.5842	7.88013	7.54548	10.6482	7.52282	6.51816	7.7202	7.99541	3.90077	8.61781	26.5675	6.07593	11.9691	13.0205	12.8538	7.03317	9.55145	5.00611	7.98575	7.2122
Slc28a1	6.01886	4.69869	6.08392	7.31608	8.74893	7.75872	7.3889	8.2256	6.14196	6.43591	7.64003	4.44134	8.14802	8.13158	4.76013	6.90546	6.23067	7.87927	6.17493	10.997	9.4022	19.8852	6.31072	10.4952	10.7358	7.47218	8.85329	6.04294	16.2611	5.36513
Kremen1	8.21492	8.92635	10.2764	5.9356	8.97433	3.40992	5.34128	13.8625	5.86492	5.83035	6.1974	8.22297	8.04303	4.84404	7.90761	5.14201	5.48105	4.44884	5.56206	10.0297	8.72756	5.61784	6.40503	6.87254	9.42811	5.92434	8.63542	10.3371	19.6853	14.331
Casp8	4.25904	6.45538	6.81479	5.90862	13.449	4.96073	4.25479	21.9574	9.43834	4.84445	9.4654	7.97883	4.31822	3.69485	3.65333	6.90958	7.18475	11.4258	7.83623	8.86208	11.0698	4.86824	8.21651	5.47854	7.66596	4.00991	6.94696	7.14651	15.7302	4.36972
Il13ra2	10.7363	11.1965	10.3607	5.56238	8.49849	6.76378	9.29975	11.5054	29.4185	13.6075	4.92161	7.40223	4.0489	11.6628	11.3448	8.34341	19.5779	4.46224	8.36044	4.34799	5.64417	9.34086	6.68009	5.74124	4.86197	14.0437	6.4419	4.96161	6.25707	6.43959
Nr1i2	20.4597	2.95743	6.34495	8.71454	9.36253	5.98837	5.42485	5.19984	6.27344	6.45593	3.65073	8.64892	9.35767	7.06604	4.25429	8.17036	6.29395	7.35667	5.03014	8.48102	6.18103	20.4683	7.25379	5.25398	7.08287	4.19547	7.84318	7.60484	8.18789	3.51087
Prkab2	21.6612	10.5325	10.5615	7.86018	14.4174	6.39943	5.03357	4.29958	9.19416	6.41589	11.487	9.0541	5.72872	10.0808	19.2567	6.98786	10.4218	10.3494	3.40354	7.21082	9.01262	7.72505	5.04936	10.3766	9.88686	7.99266	9.47222	11.4317	9.57265	5.83588
Npr3	13.8123	13.625	6.91519	8.3728	10.6273	11.3275	9.67584	10.8106	11.9458	4.60923	7.99823	9.76575	6.32213	4.32763	8.11081	7.70478	6.46432	11.9261	7.55485	11.935	5.82946	8.60792	23.062	12.3977	9.50957	15.0485	8.29872	14.2663	11.6875	18.8193
Cdkl3	6.35159	4.00759	7.12802	9.0383	12.9982	11.4162	12.0616	4.72169	4.82717	12.8718	20.4716	7.99441	7.34463	5.98595	10.7784	6.25447	8.52824	3.55103	7.10387	8.44194	5.05505	6.87967	5.27727	4.30063	8.49344	4.94676	4.23353	24.3675	4.62794	3.23776
Cyp2a1 /// Cyp2a2	13.8641	3.94582	3.67445	15.2167	5.26773	6.72174	3.66216	8.55059	7.5131	9.2635	5.42212	5.53739	4.66514	6.25142	3.6663	7.91491	3.6946	4.61411	7.6435	6.83465	5.78195	5.03482	5.26941	6.55052	3.50285	4.50775	5.7685	4.78807	4.4258	3.44978
Gna12	4.52523	8.29702	9.13592	4.57311	6.48239	18.9928	4.5739	9.58907	9.56512	5.6652	5.84902	7.63599	6.29931	10.0808	6.35117	14.944	8.70347	6.08812	8.35273	9.23826	9.52097	6.35079	3.21823	8.33433	6.88994	6.91098	8.26406	7.18655	8.37192	3.35635
Tnfsf11	11.0469	8.06537	7.89504	14.0611	9.48775	5.9183	5.17413	24.3593	9.43834	6.52599	10.6823	8.20219	5.42745	6.9933	7.34124	7.76658	6.01163	7.85247	5.5081	4.24051	8.61353	2.91511	9.85902	6.09716	8.60492	12.4461	11.9826	9.67404	3.747	8.82928
Barhl2	5.956	3.91879	3.30098	6.13346	20.8747	4.82526	4.38775	8.89052	7.90754	4.59422	9.14154	5.39194	7.3994	6.73874	6.99969	2.7729	5.14031	5.42705	5.65843	9.01353	8.83683	5.85105	4.46387	5.5421	3.53286	4.52133	22.5343	4.60117	7.69915	11.6789
Ccr5	14.1746	8.80666	9.79049	8.61112	14.025	5.42317	4.39155	5.2484	5.35309	5.46001	9.28384	5.80231	7.50439	6.20778	9.49432	6.26683	5.47131	7.3522	4.44811	9.59	10.4094	6.38827	6.42074	7.45726	20.8499	5.48533	9.36329	14.3331	16.6714	9.10598
Agtr1a	6.27026	8.34335	8.17615	6.3448	4.73344	9.2348	8.04611	4.46768	6.2124	6.16566	5.42212	10.3008	8.17084	8.10612	10.1212	7.41225	8.60125	7.75421	8.10219	11.9887	5.74869	24.0664	8.95132	9.91476	13.5483	6.36787	8.67503	8.42807	6.10019	21.3635
Bst1	8.58833	13.5401	13.9147	8.16595	23.6296	6.0164	5.02217	14.3481	7.56476	6.68614	10.1376	7.55287	6.0802	8.09158	5.52971	7.33396	8.20697	9.49175	9.43585	7.79707	5.75344	13.4512	9.91797	12.063	9.25232	12.2832	4.79801	9.0911	10.882	11.1866
Ptafr	8.28517	10.4939	13.3967	6.3403	4.09063	8.34261	4.77524	4.86364	16.9702	7.19661	7.9737	10.8254	9.28463	3.8185	4.26726	6.30803	6.89268	7.51747	6.72613	4.9782	9.06488	8.29142	6.44825	8.48263	7.86319	11.1019	7.44706	7.78284	10.1609	18.6504
Gper1	6.88397	2.13893	4.92737	7.26212	6.74536	7.01602	4.00786	4.83749	5.16056	8.34766	6.59486	6.8568	3.83436	4.31308	6.40737	8.64419	6.23067	7.2718	10.8505	22.5363	6.15728	4.5684	3.47758	5.79209	5.97671	4.04159	7.35298	4.76137	5.03823	5.97962
Klrd1	3.62314	6.54419	6.97944	17.0559	9.54619	5.4185	7.77259	21.9574	8.6025	8.3927	11.8403	6.07762	6.37234	9.07711	9.99584	9.35286	7.24803	7.06187	5.23829	5.67193	9.58273	8.27476	4.86075	7.60132	9.15371	3.79266	7.04599	4.79697	3.95517	4.03552
Leprot	10.2779	11.8606	10.18	6.95185	10.7525	5.66139	8.80209	4.82628	3.82229	7.94729	7.55661	7.9113	7.28529	3.61121	5.91882	7.28864	9.29733	6.15512	2.61336	7.2841	9.03637	8.04572	17.49	9.93171	7.49447	8.29589	10.1209	12.4864	7.02034	9.34316
Lyst	7.89328	4.42456	7.29267	9.1777	4.73761	9.0573	11.826	8.88305	27.2585	9.30354	7.91972	5.50103	3.97587	9.47351	10.5536	4.8742	6.85374	6.78046	6.57195	9.62909	9.73477	7.91245	3.98448	8.5589	9.31663	11.3961	4.46626	10.3593	18.0562	9.89296
Akap6	13.5905	8.73716	7.58582	7.56789	13.1443	7.67464	5.39446	5.0168	6.90736	7.16157	11.2417	10.1969	8.32604	7.9752	9.61538	4.5281	7.93437	11.9574	11.498	7.79707	9.83454	8.26643	8.29117	11.0206	22.7921	15.2929	8.55125	13.8703	19.4862	13.4146
Acacb	13.2245	6.0693	12.6256	6.33131	14.9809	8.64624	11.1194	9.9402	11.7204	8.24757	8.70483	6.44643	22.075	10.8336	12.0711	7.34632	8.11448	9.90716	6.1865	8.81323	7.18349	9.41999	10.5703	12.3341	9.12799	7.36809	6.33297	12.4107	15.5341	4.11818
Notch3	6.37747	4.61761	8.98332	5.91312	8.8992	6.83384	3.14171	4.66566	6.34388	7.14656	6.49182	7.01783	9.39419	9.06257	6.55005	6.22563	6.17226	4.90891	10.122	7.19617	5.31635	10.0072	18.4017	11.2537	12.6394	7.23231	7.44211	10.5284	4.20859	8.98021
Robo1	9.86382	9.10781	8.32473	7.18568	3.68156	12.1402	25.164	5.17742	5.73344	10.2144	7.20332	9.20474	9.02444	6.96421	5.97502	8.08384	6.31343	6.89213	4.21298	8.88651	5.60616	20.4474	7.13591	4.54638	4.22314	8.79826	7.47182	8.71286	11.5065	8.33338
Prom2	8.39978	6.22759	19.4806	8.15246	7.55931	5.48389	4.85122	6.24204	5.4517	17.3609	6.44275	8.82034	6.99314	3.62212	4.64772	7.36692	5.98242	6.90106	8.19855	6.21909	5.78195	4.59755	3.26538	5.82598	2.79113	6.49912	7.41735	6.65702	7.3703	3.51446
Kcnq2	6.65106	7.17351	5.37714	6.54265	5.81871	5.34376	14.679	5.07283	5.69587	6.08559	6.03548	11.7345	5.71502	9.23349	4.13323	2.8141	5.15491	10.9926	9.87912	7.4844	7.61108	8.8911	7.57208	2.61004	8.41198	3.8334	6.13491	6.71932	9.1533	4.98062
Csf1	6.27026	8.42443	6.1803	6.30433	25.3201	6.39009	5.07156	5.6593	4.83656	5.64518	7.35543	7.63079	5.42288	10.9427	9.75373	6.29567	5.61734	8.98255	5.56592	6.63923	8.89384	5.951	8.189	10.5588	20.6655	6.90193	6.20918	10.3593	11.2138	10.2631
Phka1	9.642	5.79904	6.22447	6.83494	8.80737	6.74976	4.87401	4.85617	6.99188	7.43182	6.55561	8.10869	7.99738	15.1431	7.38015	8.54118	8.8203	5.67719	7.99812	6.58549	5.78195	6.02179	7.37953	7.11405	5.76234	15.4015	6.96676	14.293	18.6867	9.72766
Sp4	9.50521	9.12325	5.74258	18.7961	6.26116	6.17055	4.19401	6.01418	8.55085	6.49596	7.1886	9.06449	9.13856	9.12075	6.69704	4.8948	5.593	5.56105	6.00533	10.3472	4.70347	7.83749	8.52301	7.23269	5.47079	9.5405	9.28407	11.7655	6.45015	9.86062
Trpv1 /// Trpv4	7.59751	5.34345	7.79866	6.83943	3.81096	6.33871	4.07624	7.93423	6.39553	7.21662	5.46628	6.90875	6.75121	7.99702	6.01394	5.58288	5.60274	11.3722	10.041	6.80045	5.62992	1.91565	17.9537	5.70734	9.0208	5.3224	7.37774	8.05428	8.19392	6.85285
Fgfr3	9.52369	7.97657	10.7262	5.30607	11.6165	6.08179	8.34242	4.32946	6.96371	9.01828	5.93734	7.53209	21.299	5.10951	6.04852	3.92655	7.5985	4.12724	16.4164	8.73506	6.96969	5.70113	6.44039	6.25816	4.62187	6.25925	4.87228	5.89164	8.5288	3.53602
Capn3	14.0748	16.123	15.5692	8.42676	15.4776	7.26359	5.21971	5.00932	6.84632	7.11153	11.7962	8.17622	7.38115	17.4305	8.53019	9.15921	9.17564	6.9636	7.2118	7.69936	9.31193	5.2014	8.77056	12.7451	14.2	11.12	8.49678	13.274	19.0789	10.5829
Kif2c	10.6698	12.7795	4.0439	8.38179	3.65652	18.563	8.37281	5.0803	5.64422	10.5997	4.6959	6.81005	20.4636	4.31308	8.68151	5.21206	5.76337	8.21428	8.81528	6.62946	5.85796	7.22948	6.908	7.96147	5.57369	5.1821	8.02639	7.73389	11.6694	12.4444
Vav1	3.57138	3.59448	6.30077	20.0372	6.92902	5.16625	7.34711	24.3593	9.43834	8.75303	10.4762	4.71665	4.6697	10.8773	10.5795	5.65292	5.62708	3.39916	4.55989	4.60203	7.07422	6.83803	5.00614	8.30044	3.67006	11.0521	11.9826	11.8812	5.04125	6.88159
Musk	6.60669	6.15038	4.20855	15.2887	4.9004	7.39905	7.96633	6.10757	4.08525	6.90133	9.36235	8.79437	8.37625	4.52037	7.70441	5.91661	7.26263	3.8369	4.78731	9.27734	7.93414	3.92291	7.15948	4.39809	4.38606	25.1592	4.98121	7.2533	4.75766	4.58893
Map3k8	21.0697	10.5981	11.0434	8.6336	12.3888	6.39476	5.16273	4.54986	6.85101	6.95138	7.91972	10.1034	7.01597	7.72427	9.20897	7.45345	9.01501	7.98647	6.66831	8.52011	6.78441	8.19564	22.5787	7.43607	6.61125	8.60817	8.23435	12.522	6.03985	7.3236
Adrbk2	8.11141	5.23535	2.88735	19.592	4.24507	4.53565	5.02597	4.40791	5.015	5.80533	5.56932	5.40752	6.45451	5.70956	4.72987	6.75301	6.47406	9.80889	22.5104	5.87711	5.50164	4.56424	4.2949	5.165	3.78153	3.96465	6.93706	4.24073	6.45015	8.85084
Nrxn1	11.8122	13.1501	11.5896	8.43125	10.5939	8.34729	5.19312	9.44712	10.1521	9.44867	8.29755	6.9503	8.50863	8.66617	9.03171	7.72538	6.85374	7.6202	4.27851	10.6501	7.60633	19.1606	10.7078	6.8683	11.6576	7.38619	8.3928	5.32205	12.7887	12.1641
Chrnb4	20.1269	10.0846	8.06772	5.69728	11.245	9.31421	8.58935	3.97459	6.9731	6.80124	7.11009	5.58933	14.1324	10.7318	9.4165	6.73241	23.2774	3.56443	6.93813	5.40812	8.2097	11.5647	4.49924	5.33448	6.78275	4.53943	5.2882	3.92034	4.90549	3.67258
Tnfrsf11b	12.9028	23.7946	8.87891	6.89789	4.74179	6.62831	5.18932	4.81508	6.81345	5.25983	5.95206	9.34499	19.1535	8.14249	6.18255	5.98666	5.94348	10.8452	7.58954	5.38858	5.74869	8.02489	11.085	10.5207	12.7509	12.3329	7.98677	5.27756	7.21041	12.5306
Stxbp3	7.89697	21.2541	11.441	8.62011	5.49313	5.76416	5.51603	4.83002	5.47987	7.7321	19.4362	6.48799	8.96967	5.44045	7.52282	7.27216	8.5185	4.39077	4.77189	10.1421	10.7895	3.83129	8.02789	7.78351	6.7999	5.18663	5.47636	8.97096	9.40973	6.14492
Bhlhe40	14.6405	13.0922	13.3967	6.075	9.58375	5.65205	5.13614	9.6974	11.279	7.25166	5.18659	6.02048	12.2608	21.3727	9.76238	8.18272	16.2338	7.79887	5.94752	6.26306	6.37107	12.8598	10.7549	13.2409	11.4346	7.43598	9.42271	7.38235	11.0298	8.39447
Kcnj9	3.25344	5.19674	12.7903	8.3638	7.28382	9.06664	8.4184	4.81881	6.71953	2.75753	6.67337	5.99451	12.4754	3.53484	5.1406	8.00555	5.59787	9.16569	10.5729	4.85607	8.89384	9.395	7.61923	7.23693	7.16433	9.50429	5.78831	2.75892	4.64905	5.0453
Fap	11.9786	14.8335	12.2321	8.73703	23.5211	13.2006	8.87427	5.16622	9.32564	8.87314	6.92362	8.197	7.27616	10.099	8.62531	7.44109	5.31068	19.0326	8.10219	7.61631	8.58028	8.20813	7.8157	6.31748	9.41524	8.23705	9.47718	13.403	8.96021	14.331
Cdh13	21.1288	4.19677	7.81874	8.21991	9.75489	7.30563	4.61189	9.99997	29.0147	7.10652	8.50364	9.93198	5.87935	3.67303	5.36974	7.86959	7.50115	5.96752	5.92824	9.40924	7.20249	6.53402	5.63485	7.68182	7.56307	9.10149	5.07034	13.0737	12.1491	13.9465
Mpeg1	13.4796	3.38985	14.2641	6.16943	9.10791	5.8062	4.96139	10.3362	10.307	6.68614	19.1173	6.15034	8.65927	3.80395	5.00225	5.15849	6.2112	7.60234	7.92874	10.1567	7.48755	9.81144	4.87254	11.2537	12.8967	4.25883	5.57539	10.2169	15.7302	6.5474
Picalm	10.2003	8.66767	9.36883	6.4842	4.59569	6.96931	10.5762	5.83487	5.14648	7.80717	5.1228	7.97363	9.64524	5.98595	3.85653	7.29688	7.71533	4.56944	6.02461	11.764	8.88434	10.0738	21.0226	5.40651	9.65105	5.75236	5.50607	9.2958	4.88136	17.2237
Epn1	11.5201	8.40127	11.3004	8.79099	14.6219	6.0491	4.94619	5.67425	6.63031	5.76529	7.23767	6.33215	9.39875	11.3064	7.04724	20.1643	8.02199	9.24609	9.04655	26.0782	11.8917	6.85885	8.83343	5.81327	5.71946	11.6858	10.2149	8.54377	10.6617	9.57673
Htr2b	5.43841	7.59434	5.70242	6.43024	11.4078	7.88484	11.7501	5.49121	5.231	5.94546	12.6941	5.38675	7.57743	9.06257	8.16702	8.86668	6.02623	8.16068	7.82467	23.6062	10.5234	5.48874	5.15939	11.0418	9.89544	10.2782	7.5659	4.52998	8.64646	7.08283
Sytl4	3.78212	6.99591	4.36516	5.76473	3.71913	8.26788	21.0916	4.80761	5.29204	13.112	7.31618	7.21523	6.07564	3.72758	5.86261	6.32451	8.42115	6.37399	6.23275	5.90643	5.94823	4.65169	4.60533	8.3767	3.47284	6.22305	23.8167	7.76059	5.64463	3.44259
Pip4k2b	11.997	12.0305	14.9227	6.42124	14.3548	16.8627	5.17413	7.74746	6.08092	6.38586	5.48591	5.84387	12.658	13.6957	7.36718	5.66528	5.8656	6.40973	7.11158	9.33108	5.0693	10.8942	8.6016	5.48702	7.91892	9.42283	11.2399	7.75169	15.1901	7.12236
Fzd4	5.47538	8.25455	14.3083	5.65681	10.8276	6.53489	3.38104	19.1221	5.771	6.62108	5.60367	5.77114	10.0789	6.70601	7.60929	6.01962	6.58602	12.7793	10.4843	10.7234	10.5092	10.1738	19.6198	11.8469	11.0831	5.62111	8.81863	10.3593	6.32645	8.64601
Pgm1	10.3149	5.96119	8.75844	7.52293	11.028	8.64157	5.23111	4.94956	6.99188	9.68389	6.21213	8.10869	7.99738	15.7831	7.53579	8.24865	10.6506	7.48174	8.1099	6.58549	5.78195	6.02179	7.81177	13.368	6.56409	13.1702	6.40724	13.6834	18.0562	8.11417
Efnb1	5.8414	5.83378	4.35713	8.07602	11.1073	6.31535	4.28898	7.63539	4.88821	6.24573	7.10027	6.20229	12.658	22.0673	9.76238	20.3991	7.2675	11.1802	7.63965	4.83164	6.62762	8.87028	8.57409	6.93186	3.32278	8.09675	11.7549	7.66269	2.51912	5.12795
Cd4	12.1301	13.9918	9.38891	8.9079	11.4287	7.75405	10.7547	4.39296	14.2702	8.43774	7.25729	8.50347	6.53211	6.20051	9.09656	9.48883	6.04083	7.32987	3.72732	9.84893	9.10289	8.10818	7.45419	5.76243	7.90606	4.80646	4.69402	8.48592	15.9806	6.58333
Wisp2	7.2278	23.59	11.2201	7.2936	14.7054	8.49209	9.64925	11.5054	12.2792	7.56194	7.36525	8.67489	18.9162	7.29151	9.08359	6.41928	8.44062	6.78046	6.88802	8.51033	5.73444	12.2601	10.5703	7.82588	3.40424	8.52671	8.94241	9.04215	6.76692	6.73785
Prlr	7.29805	7.21212	7.19228	6.37178	12.4848	12.1402	25.164	4.92341	4.93047	10.2144	6.63412	8.24375	6.19888	10.0336	7.6482	8.28985	8.58178	6.00326	7.70132	5.22736	23.2181	4.55174	6.39717	4.31335	7.28867	10.1289	7.05094	7.72499	8.25124	3.42103
Crhr2	7.27586	3.4246	4.12421	3.30505	4.44125	7.83346	14.6182	9.43964	12.3356	5.48503	4.46527	5.69322	4.20867	4.70948	8.37887	5.79713	5.87533	4.25231	12.2496	4.69485	8.76081	12.1019	3.77621	7.44455	8.69495	7.77994	3.97111	8.80186	3.41212	6.79176
Kcnk1	7.01337	6.79128	14.9227	5.30157	8.39413	4.50296	7.87896	8.40864	5.90248	5.21479	6.4771	9.15799	10.581	7.18968	5.53403	5.64468	18.3464	7.1646	5.22287	6.22886	6.21904	5.6928	4.91183	6.15647	6.85564	11.6224	10.6507	7.32005	7.82586	3.33479
Cds2	10.9138	3.35124	15.0472	6.55165	8.8825	6.97398	5.36787	5.5323	5.65831	3.5933	6.86474	5.4335	9.49461	22.0673	11.6517	7.07851	7.89057	5.29305	5.91668	5.12477	8.22395	6.92964	6.23999	3.90659	7.97037	7.63059	5.76355	11.5163	6.26612	5.57355
Gapdhs	14.548	12.3509	10.674	5.21164	25.7083	7.81011	4.19021	9.17069	12.5845	5.89541	7.14444	7.94246	12.2608	7.57881	12.0408	18.4338	9.86686	6.14172	5.12265	9.99549	6.67038	13.2888	10.81	9.23683	6.62411	10.8756	7.01133	9.04215	11.244	8.95506
Acadsb	3.89303	6.80672	9.30458	7.63534	4.37864	7.91754	8.55136	11.8117	5.18874	6.04054	6.06983	6.06723	10.2158	4.72403	3.53227	10.3953	8.93226	11.5554	9.96778	6.76137	5.38762	4.83493	20.5236	8.3767	7.7217	7.08749	5.89229	5.82044	3.10138	2.06268
Smad3	13.3982	7.78739	11.0113	6.60561	9.10791	8.04366	9.40992	6.7314	5.80387	7.02645	7.71854	7.79702	12.4936	8.72072	12.1878	7.82839	7.62771	10.6665	7.34671	5.99925	7.64433	6.6298	6.42467	9.30886	21.3043	10.9661	5.84772	8.56602	16.3788	10.3781
Csf3	5.24986	7.62909	11.1197	6.31782	3.4019	12.1402	11.8716	5.26708	15.2986	12.2062	5.6969	6.29579	13.6211	5.32044	4.98063	6.06906	3.28084	4.90445	2.7714	7.12777	5.42562	7.3336	9.58396	6.94457	6.02387	5.14137	4.74849	7.2266	8.84255	3.81991
Prokr2	5.27204	3.83385	3.32909	9.03381	3.29337	5.84357	11.355	8.36008	6.66788	11.2103	7.89028	6.22826	5.67394	5.70956	5.65509	4.65583	7.75914	4.54711	7.87863	7.27922	4.8175	6.06344	8.18114	20.6176	4.18455	23.0502	7.9224	5.58905	5.27355	6.17008
Il11	6.62148	6.4245	10.5856	8.45374	8.24387	5.57264	4.10283	6.68284	6.38144	6.45092	3.34159	6.0049	17.7933	7.33515	4.95036	4.98957	6.6639	9.81336	10.3224	7.57723	7.72985	8.01657	5.91777	6.61832	4.20599	7.08749	7.35793	11.0268	2.42861	12.3617
Necab1	6.39966	4.29716	20.4604	7.1497	4.49134	6.84319	6.12006	4.25475	2.68124	5.96548	5.84411	6.15034	4.83403	4.33127	9.2868	7.67182	8.58665	7.78547	8.24866	4.57272	5.57766	7.7084	4.31848	13.5671	9.32092	4.74309	6.82317	3.63555	3.83751	3.06887
Dnajc21	9.39429	11.2004	11.5253	6.8889	9.48775	6.73575	4.63088	4.41911	5.79918	6.92636	8.48402	6.63863	6.76491	10.3463	25.2706	7.19799	19.9771	6.11939	6.21733	8.54942	5.94348	5.63034	5.39122	4.85569	5.71089	13.0616	6.53103	8.05873	10.2696	9.03052
Bbox1	15.8235	4.10797	3.73067	6.54265	3.38938	5.83422	9.1174	4.20992	6.30162	10.8199	5.65765	5.51661	7.16204	5.07315	5.30489	8.33105	3.422	5.72185	5.35778	5.13454	6.58486	5.96349	2.52665	6.90644	3.96589	7.1599	5.83782	3.92924	3.83751	10.3026
Mstn	14.3669	14.5015	8.0637	6.6191	7.78471	7.33832	8.47159	4.93088	8.35833	10.6248	9.0385	8.8567	7.42223	6.08414	6.78351	5.73532	8.73268	5.73079	19.2918	6.58549	8.31897	9.2076	9.65469	12.1011	11.4346	15.2521	7.14502	12.3351	19.7547	14.18
Samsn1	13.0951	11.9919	5.88313	16.215	13.0524	7.36168	7.04699	7.57189	28.2164	6.49096	10.1376	5.43869	8.77338	7.717	11.5739	5.35626	10.4364	8.45548	7.18867	7.50883	8.79882	10.1279	7.13984	10.5503	10.1484	4.3584	4.75344	4.33863	10.1247	13.6985
LOC100912863 /// Ltb4r2	7.11689	3.93809	3.16043	6.22789	3.60643	5.68008	5.29189	5.21478	6.39083	6.24073	5.97659	5.94776	3.985	4.49128	13.3681	8.24865	10.3439	8.16068	4.10891	10.1567	6.08126	7.38773	11.5723	4.41927	8.96077	8.91593	14.1514	5.28201	4.41072	5.33279
Cd47	5.17962	13.7022	8.11189	5.22513	11.2325	6.39476	5.56921	6.70151	18.4541	7.04146	6.86474	7.76065	7.54548	6.56781	6.61922	6.77361	7.31617	4.50691	5.81261	8.87674	5.02654	8.16232	8.0947	12.4697	7.73028	3.96917	4.79305	11.4317	11.2651	18.4563
Cysltr1	12.7476	14.0883	12.1076	7.80622	9.03277	12.4018	10.675	5.15875	6.79936	11.5956	7.57133	7.31912	5.36811	10.4554	9.20465	6.37395	7.63744	5.37345	5.65072	24.5735	9.50197	6.72559	11.0025	10.7579	6.30684	12.9892	11.2746	9.29135	19.6853	10.5829
Hpcal1	20.3968	11.0189	10.8065	6.83044	12.2761	6.93194	6.26442	12.5775	9.79051	7.71708	9.14645	7.84377	8.38082	6.54599	4.47911	5.30682	6.58602	7.69167	16.347	10.6843	10.4664	5.68864	10.4052	6.91915	9.16228	7.38167	8.30862	8.55267	6.49842	12.7426
Golph3	8.58833	5.30098	8.83474	7.66682	3.36851	5.22698	6.88364	9.22672	11.8848	6.40588	8.02768	7.84377	7.9563	21.3727	9.76238	4.96484	6.08951	7.03507	4.29393	6.81022	5.51589	10.4694	14.1107	4.43622	4.19742	11.0748	9.26426	4.98831	2.60359	7.60748
Stc2	7.79715	22.3622	4.23264	5.83668	3.9988	6.91325	8.68812	5.62942	9.19886	9.57879	8.45948	6.93992	4.46429	5.94594	4.52666	8.92024	6.33776	9.26395	4.91451	9.94664	8.52802	4.8141	6.28321	22.5709	5.54368	7.15085	9.45737	4.29413	9.13821	4.39128
Pemt	10.1855	6.82603	14.2279	8.75951	9.17887	6.10982	4.81703	9.1296	12.2839	4.88949	8.95999	2.59208	4.73818	11.9355	9.0101	7.24744	7.80295	5.42705	3.85066	6.58061	5.87697	22.8503	9.9494	5.34296	6.37973	4.48512	6.42705	5.01056	12.677	3.67258
Atpif1	6.61039	12.9224	9.04757	7.76575	12.155	11.4442	19.6898	9.07356	9.38669	6.91134	6.92853	7.43859	6.74665	5.62592	4.12026	5.76828	9.84739	4.02897	7.18096	6.07253	6.42333	8.59542	7.93752	8.70296	8.55775	7.06033	6.80336	8.72176	8.94211	16.4943
Amelx	7.89328	3.87632	7.0196	6.35379	3.45199	5.85291	4.79423	7.85952	7.69624	5.13471	8.43004	7.1477	6.00717	5.92049	4.03379	17.1771	8.37734	2.87209	5.01858	3.87899	7.18824	4.45596	8.80593	19.6897	2.88974	5.64374	6.11015	6.21203	3.67459	4.35894
Ddit3	12.1117	10.3896	13.5894	7.08225	13.4031	6.27798	6.08587	4.75905	6.71953	7.01644	7.8314	8.64892	8.7323	11.2482	13.3854	6.71593	7.48168	4.54264	6.12868	6.54153	7.43054	13.5553	8.86487	9.99527	25.6261	13.4327	4.98121	8.17443	13.5519	12.1389
Wbp2	11.2946	8.19278	6.09195	6.16943	11.4287	5.73146	4.82842	6.18228	10.199	6.74619	6.73716	8.10869	17.46	5.41499	8.49128	6.72417	19.4611	5.02058	5.68926	8.32469	7.02671	10.9608	11.9102	6.70306	11.2846	9.05171	6.90239	12.6377	6.39584	6.5474
Efna5	4.19619	3.42074	6.81479	5.93111	4.29933	8.76301	9.89998	5.91332	19.088	6.02053	6.50163	5.5218	6.7923	3.11662	5.40433	8.77603	7.45734	7.32093	23.4393	6.64412	7.18824	9.09516	3.83123	10.0842	5.61656	8.6489	7.74415	9.86093	4.31116	4.20083
Vapb	9.47563	3.87632	10.4411	6.20091	5.57661	7.82879	5.34508	10.0859	12.5234	9.01828	5.87355	9.67744	8.22105	19.3216	10.5363	4.98133	9.35088	6.709	4.83742	6.73206	6.30456	9.96136	6.90014	10.5376	8.53632	8.29589	10.8289	7.47135	19.7547	11.7293
Kcnip1	4.54742	4.55197	8.48135	7.61736	7.20869	5.05415	4.06484	4.26222	5.02439	6.89133	19.1909	6.75291	5.99804	5.18225	3.95597	8.50822	5.90941	9.03615	7.16169	5.00752	6.34256	3.69387	4.40493	6.56747	3.76438	18.7008	3.35217	5.6736	3.17379	4.46315
Ube2n	7.28696	4.40526	9.05159	5.60285	14.5969	8.00629	9.28456	4.65445	7.2971	14.3332	7.61059	5.69322	7.11639	4.41855	7.42771	20.3991	7.23342	7.96861	10.253	24.3683	9.42595	5.47625	7.51313	5.92343	10.4442	9.59933	6.14977	4.35198	8.65249	5.33638
Fkbp1a	3.91521	5.69093	8.26048	6.68655	5.92306	7.99228	7.76879	9.76837	9.40547	6.52599	8.29755	12.0046	11.4529	6.87329	25.102	8.81723	7.59363	28.7924	9.76349	7.17663	7.10747	4.08116	7.38739	4.01675	3.68721	6.88835	9.74951	6.21648	4.04567	4.23317
Ide	22.2084	6.42836	7.14007	6.99232	8.09777	8.98723	7.76879	4.40791	7.44737	6.63109	7.27692	11.6773	8.64101	8.46979	18.3055	6.17206	5.63681	11.8368	7.92103	5.75009	9.10289	10.6901	8.79807	13.2409	12.6394	5.62111	6.65977	6.33663	10.0644	4.90875
Myo1c	5.60108	25.1459	9.09175	4.96432	14.6219	8.21649	5.14373	11.9163	11.589	6.541	7.07083	12.0202	11.7131	11.1718	13.8351	20.4898	5.51999	11.7653	9.76349	8.31003	7.83437	10.0322	14.1932	11.5672	14.2129	9.34136	10.4229	6.87506	11.2078	10.3493
Abcc8	21.6612	10.2777	8.68214	6.46171	14.7763	13.4061	9.92277	10.1232	13.2982	10.4446	6.94325	8.48789	9.92369	5.90958	4.38831	7.94375	7.66178	6.19086	4.94534	6.22398	5.59191	11.8312	14.0871	8.45297	26.9338	4.97844	5.46151	9.77638	6.84838	12.1641
Eef2k	14.548	14.8142	15.5612	6.47071	9.10791	7.66997	3.40003	4.99812	6.47536	5.73026	8.21414	6.82564	7.32637	14.3721	10.1515	7.14031	9.3022	5.52532	5.29996	6.54153	6.32831	8.47466	9.62719	6.47002	11.2846	15.2521	7.74415	10.0879	15.7302	11.1866
Gja1	5.4532	6.98432	8.39701	7.76575	5.46391	12.257	25.164	8.5095	6.40023	9.27351	5.60367	7.76585	12.4799	9.6517	25.102	5.29446	8.27025	6.15959	5.51967	4.6118	5.95298	7.88747	10.8532	7.42336	9.69822	6.83404	11.5816	5.37545	8.37795	3.2162
Cacna2d1	13.9195	13.7563	10.5615	7.20366	13.5492	9.93547	12.468	8.67013	11.6124	9.97416	11.2417	10.9293	7.97456	17.4305	9.75373	8.80075	8.2167	8.94682	6.90344	6.37054	8.81308	7.80834	7.63888	10.7156	14.2	12.9666	8.47202	14.4399	18.373	10.2056
Thy1	7.71582	11.1348	6.614	20.0417	3.66904	5.02145	5.64519	4.44526	6.08561	8.08242	6.83039	7.94246	6.9338	5.12042	7.98976	5.61172	8.58178	9.60789	10.8774	11.7884	21.2797	13.1846	12.4289	12.8341	11.5461	7.8433	7.21434	9.64289	6.39886	7.03611
Prkaa2	19.8681	13.5864	11.441	6.81245	6.14429	6.68904	8.12589	9.19684	10.4667	10.2294	9.16607	7.73988	6.74209	8.41888	8.16702	10.4159	9.47257	7.90607	7.94801	7.68471	8.27621	7.40439	11.5566	9.34276	26.9338	10.3189	8.47697	9.54054	13.0481	10.5829
LOC100911343 /// Pcyt1a	4.03722	5.63688	3.80697	6.16044	7.35061	5.1429	6.85325	4.58348	6.94023	27.7405	9.72055	6.23865	5.56439	8.3716	5.547	4.98133	7.59363	4.39077	14.5893	6.48779	8.81783	7.79585	3.30861	9.00803	11.8205	4.66163	5.4318	2.10034	3.31256	3.2198
Cpa1	13.4241	15.6134	10.417	4.8654	14.0793	4.81592	5.49324	4.9645	6.18422	7.05147	6.62921	3.85955	7.72806	13.6666	6.45493	9.97913	5.73904	12.1182	11.1588	6.82976	6.71314	5.34299	4.74679	6.04207	5.55654	12.9258	6.78851	23.0682	8.50768	13.9465
Cebpa	6.80633	4.10025	7.5296	8.59763	5.13833	8.19781	4.18261	4.09412	9.18477	5.81033	9.38198	5.72959	11.6811	9.6517	25.102	11.8909	7.53522	27.0013	9.04655	6.76137	6.82716	7.22948	4.27526	6.83864	8.67352	7.35451	10.7596	6.25653	4.24479	4.47753
Cga	4.77294	25.1459	9.90695	6.83044	13.449	7.66997	3.1569	8.79714	10.2319	6.14564	6.11399	6.0984	7.55004	9.62625	7.66982	5.89601	5.97269	9.63022	7.92874	9.49718	18.106	6.40076	4.53853	6.91067	6.40974	6.77068	5.02082	8.81521	7.39142	4.72548
Il18	3.89303	3.40915	8.9271	8.24689	6.60761	9.60849	25.164	12.3944	12.5704	14.8036	10.1573	6.72694	7.44962	11.1718	5.26165	5.24914	6.10411	6.66433	4.99545	4.47989	9.85829	9.51993	8.53872	13.4824	10.8001	5.89266	10.7992	6.95516	15.7302	4.31582
Gpd2	9.93037	25.366	15.4005	8.67857	14.5969	7.80544	10.1203	10.9301	11.8331	14.6184	10.7853	7.6204	11.2201	7.64063	10.8994	7.21448	7.37946	10.5682	10.5614	9.80496	8.18119	9.12847	23.062	8.59703	12.4765	14.012	7.87289	12.8512	12.2879	9.82469
Cd200	5.7083	6.74881	6.12408	7.50044	7.08346	5.47922	4.71066	5.30443	7.55067	7.28669	7.06592	4.44653	5.11248	8.75345	12.3046	6.90546	6.53734	7.57554	10.068	7.12289	8.27146	23.7082	6.4954	6.72001	7.45588	4.33577	6.31317	13.1805	15.7513	7.89856
Alox5ap	9.02089	11.3741	18.5168	8.26038	12.155	12.5046	8.33862	3.69816	5.52213	7.45184	6.78133	8.11388	10.9781	4.16398	6.51113	8.4629	6.0311	6.11939	5.34236	12.9023	8.53752	12.0311	9.96119	24.1344	8.2362	12.7357	9.71485	11.2137	8.23616	5.6598
P2rx5	9.18726	5.07705	6.96338	7.23064	9.58375	13.9433	12.4263	17.6055	8.71051	11.0151	6.80095	10.1969	4.02608	4.07306	3.85653	9.84729	5.63195	10.5593	5.18047	10.2349	6.70839	5.38463	19.7691	4.16928	9.41524	8.50408	11.6311	4.07609	6.39283	3.37791
Cnr1	20.1269	12.7911	11.8305	5.23862	14.0542	12.1402	21.4525	8.26669	8.52737	6.7562	5.77051	8.74762	10.5262	7.31333	8.33996	5.40571	7.17988	9.80889	8.83455	10.6941	8.05292	11.9145	7.40311	8.05892	6.76989	11.6269	11.3389	10.4261	10.3178	8.81491
Nfia	8.92107	7.82986	8.903	6.37178	8.21047	6.85253	3.8635	10.6574	11.279	7.18159	5.72634	6.32696	20.5412	5.37135	3.61874	11.4748	6.61036	12.3058	13.0822	21.4077	5.60141	4.51426	10.0123	6.23698	8.5406	7.97908	11.2894	4.82812	7.43668	8.13573
Slc2a13	4.41062	8.58659	8.28859	16.3679	5.79366	6.89457	5.39826	5.94694	6.55049	6.40588	6.14834	5.9114	10.1748	11.1573	8.21458	3.76175	7.00464	7.95521	6.34453	20.9729	6.06701	11.9145	12.6293	9.48682	10.1827	12.5321	9.46232	5.69584	6.05493	4.00678
Tcf3	3.47896	11.4321	5.33698	6.89339	10.5521	5.9183	7.14956	7.26931	6.56458	7.29169	6.43784	7.58404	7.4131	7.94611	6.72298	7.6883	7.45734	6.61966	14.7744	5.98459	8.66104	3.96456	7.83535	7.9191	5.51366	11.7944	10.819	6.66147	5.81961	19.883
Nsf	7.44223	2.81072	3.64634	6.67755	7.07929	5.99304	21.0916	3.99326	5.9964	11.6357	7.94917	7.08536	5.76524	8.32796	7.88599	5.45103	8.87871	6.9368	10.4226	6.09696	8.07667	10.7276	9.37177	5.15229	4.23172	5.96055	7.24405	6.45677	5.24942	2.90716
Wt1	6.12977	7.7758	3.84311	6.36728	8.34822	8.06702	19.2073	7.68022	5.339	6.16065	9.64695	8.2853	4.86599	6.53872	6.86998	10.4447	6.99977	27.0013	7.77841	8.16347	7.13123	4.42681	8.0554	7.14795	3.91444	4.66615	8.55125	4.32973	6.54367	2.87482
Ensa	8.34802	5.48244	8.62591	8.75052	11.4454	7.52517	4.80563	8.74857	10.1286	9.82902	6.91381	9.41252	11.2612	22.0673	7.23748	7.64298	6.85374	6.642	5.45028	6.27772	5.16432	4.90156	6.38538	9.00803	8.25334	12.2651	4.88218	12.7267	11.244	21.3635
Slc6a20	5.49017	8.3588	5.49761	6.53366	7.11268	5.87626	5.78195	4.91594	6.22649	6.90634	6.00113	10.6592	9.49461	6.77147	10.0866	5.6076	9.51638	8.73688	4.97232	9.05261	5.73919	8.17065	8.2951	20.6176	5.14494	12.9485	5.33772	12.8512	12.4689	9.31441
Cacng1	14.0748	14.8335	15.5692	8.14347	11.9588	7.26359	5.01077	4.9757	6.99188	7.7371	11.7962	8.61775	7.21682	6.50235	7.55309	9.15921	8.70347	6.6688	8.13688	7.69936	9.31193	6.1384	22.5787	9.27073	11.5804	11.12	8.49678	15.2408	19.0789	10.5829
Stk3	10.862	6.53646	10.678	8.26937	9.88846	6.92727	10.4052	10.6761	12.2792	12.2913	7.53208	9.37096	11.2703	9.11712	23.7747	10.2346	10.0859	13.8781	11.0509	7.92409	9.52097	13.9592	13.2502	10.9783	14.7531	14.6683	11.1854	13.6878	18.0562	7.72966
Ssr3	3.22386	3.99987	3.99571	6.20091	4.44125	8.00162	6.78107	4.08665	5.31552	3.57328	8.27302	7.44898	11.4529	22.0673	9.76238	5.7312	20.0696	5.48512	4.29778	4.09884	4.83175	8.91609	7.7882	6.86407	6.71844	9.05171	8.63047	8.49037	4.15126	3.83429
Strn	4.15922	6.63299	4.46154	3.27807	5.13833	6.27331	5.34888	6.10757	5.27796	5.6602	7.00704	5.89062	13.0277	7.31697	11.4615	6.24623	8.04633	4.59178	4.30164	6.14092	5.87222	12.8765	13.2777	11.3299	11.7819	5.57585	6.36763	23.5221	8.73395	5.6023
F13a1	11.7419	7.69473	11.5856	8.16595	9.09121	7.52517	12.8859	4.15389	6.65849	11.6657	8.71955	8.14505	25.4529	13.1356	9.76238	9.62479	6.1966	10.4521	7.23107	11.7005	9.66825	13.2513	11.1833	12.1943	15.3019	14.6457	9.2395	15.1296	5.8347	20.7382
Adap2	6.0854	8.63292	24.6529	6.23688	13.4865	8.16978	8.29684	4.86738	8.04841	5.9905	12.3212	8.74762	10.1337	7.42607	4.24132	10.5889	7.1166	9.49622	23.4393	10.1176	8.89859	7.47935	4.04735	7.99113	6.79561	4.75667	10.6705	5.81154	9.43689	9.01614
P2rx4	9.50521	15.0149	24.3517	6.20091	10.0346	8.86578	10.7167	9.39482	12.0867	12.6967	9.52918	10.3631	8.89663	7.7861	10.7654	8.04264	6.73205	8.79048	7.2542	11.2217	8.09568	9.8989	5.81954	9.85544	22.3162	14.6819	9.27416	14.5333	13.196	15.1539
Nat2	6.11868	19.0843	6.01164	3.39948	3.6273	6.88523	7.55985	5.75269	6.24527	7.44183	6.41822	5.53739	9.70459	8.96074	13.5584	5.14613	5.17438	5.54765	4.08193	11.4758	5.08355	4.86824	6.89621	18.8423	8.92647	7.26852	7.14007	9.64289	10.5652	10.8848
Tshb	4.40323	2.89566	5.16029	5.68829	3.79844	3.24643	3.90529	4.44526	18.2662	4.96456	5.28472	5.51142	5.41375	4.5822	5.35677	16.2295	6.08464	4.72578	5.19589	4.31379	5.67743	5.35965	4.067	4.24131	4.43323	7.21873	4.86733	5.98509	2.65186	3.71211
Gpam	8.92476	9.42054	9.54151	18.0002	3.18067	6.12383	9.36053	7.79602	8.59311	9.33357	6.69791	8.78917	6.95663	7.33879	8.27511	5.04313	4.39068	19.7205	7.07303	9.59	7.11222	6.94214	3.75657	5.6565	9.14942	8.98834	9.85844	7.76059	4.22065	4.63205
Pou1f1	7.15756	6.18898	2.3412	6.17393	5.94811	8.54814	4.83982	4.14642	6.43779	8.23256	15.4076	8.0048	4.82947	3.14208	7.77791	5.76416	7.82242	5.89159	5.30767	10.4107	16.0583	11.1108	14.4408	7.94452	13.7413	13.1883	8.41755	6.24763	2.66695	7.4889
C4bpa	12.4961	7.21984	6.62204	5.47245	14.5593	8.7163	5.59581	8.62157	8.58372	5.46001	5.91771	10.7527	5.25855	4.1458	8.66854	6.5676	3.48042	7.42814	7.95572	7.32807	7.21199	6.7589	9.26961	6.92339	8.56633	9.49071	4.75839	5.37545	6.92984	5.95446
Irs1	12.4703	13.8258	14.9227	3.93009	14.6219	7.91754	5.2539	5.36046	6.87449	7.06649	7.78233	8.8619	7.05705	8.97529	6.54572	6.12674	8.89818	8.46888	4.59073	8.96956	6.32356	18.3777	6.25178	5.97852	4.29603	5.08253	5.98637	6.22093	19.7547	8.44118
Myo1d	8.21492	8.4476	8.6219	8.9079	10.5939	6.01173	7.84097	7.8147	6.09501	7.23664	8.08165	8.70087	10.9781	6.17505	6.32523	16.8393	3.80169	6.7894	5.68155	9.87336	11.7492	9.99468	7.68996	7.35557	6.33685	6.96529	8.17493	7.76059	15.3199	9.2102
Kcnj11	10.0672	8.66381	12.461	4.15492	12.1967	6.61897	5.89972	9.56665	9.72947	7.26667	6.38877	7.73988	7.65503	5.54228	10.4109	7.11147	19.9771	5.49405	6.0169	5.49605	5.75344	10.8067	7.79999	8.13519	17.6514	6.88382	7.59065	11.1647	8.5288	13.3787
Ppat	9.69376	14.9261	13.2521	5.88164	16.1872	10.8603	11.317	10.9749	13.9838	9.57879	9.79416	11.1059	11.3068	9.6517	13.446	9.24986	7.24316	10.0099	8.52233	9.31154	5.58241	22.5921	7.63495	9.25378	7.50733	8.59459	11.6014	15.6458	18.373	15.1539
Jun	10.1411	14.8142	12.6538	8.17045	3.68156	24.2384	6.16944	17.2842	4.88821	5.45501	6.01585	6.63344	8.20279	4.52037	5.1406	6.93842	5.69036	8.64755	7.8979	8.70575	5.90072	9.09099	10.5978	9.04192	11.2803	11.4006	10.0169	4.83257	10.3389	11.5927
Clcn4	9.53109	8.06537	6.34093	5.73775	22.1186	6.16587	4.16741	4.92714	3.31516	5.93545	6.13362	9.58913	11.4072	7.14241	8.41778	7.51937	6.62983	6.24892	14.5277	7.00075	5.76294	9.41999	11.5566	8.00808	10.307	9.49524	5.45656	8.12103	8.63137	9.00177
Kcnj12	4.41802	14.9261	11.6297	6.79896	12.2134	6.39943	5.04876	4.88232	2.99115	7.52691	6.4771	5.89581	6.72383	6.75692	6.45061	8.03028	6.85374	5.59679	6.82249	7.28899	5.39237	4.5684	5.34014	8.39365	18.2088	9.03813	6.34783	12.2238	18.0562	13.4865
Atp1b2	14.3669	15.2813	11.5494	7.05527	16.2373	5.40915	5.6148	5.07656	6.58805	7.30671	10.4517	7.5217	12.6214	11.6191	13.8351	5.76828	8.81056	5.06971	6.12868	7.00075	8.35223	5.6928	12.8454	25.2233	9.74538	14.9172	8.77406	12.0013	19.6853	10.5829
Sell	10.936	10.3626	15.4487	4.34828	3.4019	4.99809	7.43828	21.9574	9.43834	6.8663	10.5106	9.87484	8.05216	5.32771	8.4956	9.11389	8.89818	5.02505	6.81864	8.95979	6.24754	4.22275	3.94518	6.17766	6.40974	8.97024	10.6705	7.01301	3.21602	10.777
Leprel4	8.02268	11.0151	21.1833	8.28286	3.60643	8.09972	7.7384	4.82628	5.97292	7.28168	22.9446	7.92688	8.85555	4.97496	6.79648	6.65413	5.46644	6.54373	4.5252	8.07065	9.97707	8.92025	7.59958	6.9361	4.6476	6.81593	6.34287	11.81	7.42763	12.5306
Dmd	5.92273	8.32405	6.24054	7.24863	25.1574	6.14252	4.69546	4.20992	7.29241	8.32764	5.481	7.22042	7.37658	9.58988	9.92235	9.13037	6.02623	22.0745	4.71022	8.63735	6.35682	6.52153	8.49943	9.71138	4.28316	6.29999	6.53598	10.564	9.03262	3.02574
Dnajc5	8.29626	7.64453	9.76238	6.47071	8.73224	7.56254	7.61303	7.99774	6.33918	5.9955	5.97659	9.61511	10.0196	19.8707	14.0037	5.70648	5.85586	7.72294	5.22672	6.56595	5.43988	5.20973	8.2558	7.80046	14.2129	8.16464	9.77922	4.12949	19.0789	12.218
Ccl20	4.40323	4.7566	7.56976	7.33856	4.25759	8.76301	8.35002	24.3593	13.2559	5.84537	11.0749	5.22052	5.99347	5.4259	4.47046	20.5227	9.31194	4.60071	5.3385	5.99436	8.24771	6.24251	3.83123	6.84288	7.82031	3.72025	8.18979	7.26665	2.99277	5.00578
Rab3a	13.4796	7.96499	7.81874	7.6893	14.0793	7.20753	5.03736	5.00559	6.13257	8.99325	6.52617	8.65412	11.389	7.57517	25.102	5.18734	6.90242	5.82905	6.54882	8.17324	5.26409	8.48715	8.66054	6.32172	5.57797	10.2601	7.07075	13.0737	15.4405	12.1569
Cngb1	2.1517	6.94958	4.47359	18.0721	11.1824	8.06702	4.53591	5.42023	5.43761	7.46685	17.2379	6.79447	5.17639	8.32432	9.2695	4.50338	6.93649	6.59286	3.73117	5.42277	5.5634	4.11864	5.00221	4.23708	5.2264	8.08317	5.83287	12.1882	3.64141	3.70851
Atxn3	12.9176	8.97268	5.21651	6.01205	7.384	5.18961	6.10486	10.6873	13.7725	7.56695	9.04831	5.61011	6.61427	20.889	6.29064	5.97841	9.53099	7.46834	4.20913	25.7264	12.4428	10.865	7.76855	4.80485	7.97466	5.1821	8.30862	5.04616	7.22248	6.69473
Omp	5.54933	3.10414	10.9149	6.10648	3.2892	5.99771	6.94442	5.20357	4.43273	6.61107	5.00503	8.43075	5.07596	3.63666	3.21233	6.42752	7.33565	4.17191	4.84513	6.44382	5.91973	5.41795	5.43445	5.90225	3.82869	3.42154	3.9513	4.89042	2.66695	17.5903
Ifit1	5.62696	8.19664	4.9354	7.5544	10.1055	9.4123	7.80678	7.1311	6.04805	3.8085	9.94136	10.3371	11.1425	4.57492	14.7171	10.968	19.5585	10.7826	6.68758	12.5896	11.7492	12.6266	8.96311	3.74981	3.13841	12.4732	8.11056	6.98631	5.50887	4.16489
Hspa2	13.0174	13.0768	9.69411	4.74399	13.7954	6.3714	4.81703	4.94582	6.79466	7.59197	8.36625	7.31912	23.1294	5.62956	8.68151	5.14613	8.10961	8.33934	8.07135	8.77903	9.65875	8.30808	8.19293	7.26659	9.78825	13.6454	6.37754	9.29135	13.0029	12.7103
Gabra3	6.56602	7.11946	11.5494	5.03627	10.452	5.04013	5.04116	2.71572	6.11848	7.47686	6.91872	5.47505	5.18095	17.1687	4.24132	6.8313	9.73543	7.89267	5.54665	10.3082	5.12631	7.10455	8.63303	16.9398	4.24458	12.9485	8.7295	12.028	2.56135	8.49868
Kcns2	5.95231	7.2237	5.30887	6.77648	4.38699	3.31649	2.38192	4.44153	4.70039	6.17567	5.3387	5.12182	8.41277	8.69163	12.0884	14.5484	6.17713	5.64592	4.57145	5.26644	4.79849	3.11917	4.70357	12.5841	6.77417	3.43965	6.25375	6.92401	6.04286	4.00318
Cnr2	10.936	7.11946	5.99557	3.95257	5.9815	17.7129	4.12183	24.3593	8.41468	5.24481	10.9522	8.68528	6.63253	6.02231	5.17086	7.37928	6.30856	5.31985	4.63698	9.86359	6.55161	5.28052	5.34407	4.95314	5.41934	9.24632	12.7501	6.92401	3.44229	8.32978
F10	5.30162	6.10018	4.63422	6.32232	3.72331	6.647	5.02977	24.3593	8.37242	6.2057	9.38198	6.2854	7.56373	6.71692	8.32699	4.44158	8.17776	6.83853	7.13856	4.48967	4.88876	10.103	5.43052	7.63521	5.29929	6.41766	11.6014	4.84592	7.12292	4.18286
Pim1	5.99667	8.65222	6.73448	18.9355	10.2307	4.74585	9.50869	4.18751	5.40944	9.71392	7.59096	5.30363	23.9648	6.12414	4.28887	5.66116	7.76887	7.6604	7.41609	7.65539	8.68005	8.98688	9.73328	6.48697	6.38402	10.6765	6.14977	7.94748	5.68385	3.39947
St8sia1	2.2848	3.80296	5.3932	6.79447	4.24924	8.05301	11.0928	24.3593	12.3168	9.3736	11.5312	7.23081	9.59503	4.61856	9.78832	10.3541	6.55681	6.11046	6.64518	7.54303	9.62549	3.24827	6.33037	6.48697	8.87931	5.78404	8.18979	5.84714	12.6077	5.09921
Magt1	12.2928	12.3394	9.07568	7.52293	6.46569	7.49714	9.62646	4.25475	6.9731	12.6967	7.25239	9.78653	6.06651	9.22985	7.66982	9.45587	7.92464	10.7514	9.97163	12.9902	7.01245	11.8604	8.02789	21.9184	10.2856	12.8761	5.54073	15.1296	4.61888	17.7879
Gpr182	12.9176	7.76036	14.6938	6.28185	11.3035	8.25386	11.2068	9.79452	11.697	8.25758	5.90299	5.81789	4.95728	5.22589	6.98239	5.61584	7.25289	9.29522	8.41055	9.3897	6.20954	1.68244	3.59546	11.6816	10.8044	4.20904	25.8023	4.48548	7.75647	3.91334
Fcer2	6.4662	4.29716	3.5861	6.11097	6.74536	4.8673	7.25973	21.9574	9.43834	9.92411	10.5106	6.13996	17.4098	5.07678	5.26598	5.23266	5.75364	7.0574	5.08411	5.48628	6.40908	3.48148	4.35778	6.63526	4.62616	10.0474	10.6705	12.1482	3.26128	8.74304
Cd8a	6.28505	5.18516	6.32487	7.99058	5.08824	5.91363	3.27467	24.3593	9.43834	5.81534	11.5312	10.0463	5.82914	5.79684	6.76622	8.35989	6.74178	5.21265	9.432	9.61443	8.09568	11.0608	8.40905	6.97423	4.24886	6.72994	12.7501	6.69262	9.73556	7.12955
Pdyn	4.27383	9.94948	8.32473	6.35829	7.25878	6.25463	21.0916	5.26708	5.25917	10.92	8.69501	6.50877	3.98043	4.19307	5.78912	5.85893	5.88993	7.09313	12.1995	7.25968	7.63483	5.37214	3.89017	6.2285	6.98855	7.62154	7.28861	6.68372	2.72728	2.43641
Fgf7	4.39583	8.50165	10.2764	3.21961	8.57779	8.34729	8.13348	12.1255	6.52701	6.02053	6.57524	7.61001	8.76882	4.13489	4.93739	4.79592	6.78559	6.79833	4.64084	12.404	11.9345	9.65319	21.8635	6.53781	10.9759	13.9713	8.86319	14.3509	8.80032	11.1184
Batf3	9.8971	7.44763	7.81874	7.07326	7.55096	6.10048	4.98418	2.36458	6.90736	6.60106	8.47911	8.79437	10.0469	8.05521	7.70441	6.28743	6.15279	5.51638	5.37319	10.5769	8.60878	5.82607	8.90809	18.0754	5.73661	6.35882	7.88774	10.9111	15.9806	5.16748
Podxl	9.86752	5.01142	3.562	7.22165	9.59628	7.58122	7.20275	10.5454	11.7392	7.55193	10.9571	9.08007	7.44049	7.50244	6.29928	5.59112	5.84613	7.54874	16.1967	7.87523	6.72264	8.87861	5.18296	4.55062	8.06041	7.46313	5.33772	11.6097	12.4689	10.1086
Gnas	12.1301	9.75257	13.9147	4.90137	5.80619	5.35777	8.27784	5.70039	6.18422	8.13246	7.45357	6.49838	6.42712	8.47706	10.679	15.0717	6.63469	7.26733	8.98102	7.81172	13.0415	22.005	11.7334	5.8853	12.2021	14.098	8.9028	12.8512	10.5803	10.0403
Plbd2	6.45881	4.22766	5.71045	8.00407	8.0602	17.7596	4.47133	6.90323	4.61117	5.79031	6.66356	7.92169	4.40952	5.14224	7.04724	20.3991	7.02898	13.8781	9.04655	6.16047	3.73902	7.38773	8.74699	6.31325	4.38606	9.05171	5.78336	6.00734	5.50887	7.91293
Gpx3	8.97283	6.26234	5.61407	6.51567	9.67141	14.8261	5.44765	8.40491	7.34876	6.18067	8.15525	9.59433	9.63612	12.481	10.6919	20.3991	8.78136	14.2041	8.91164	6.32657	10.8607	14.384	12.4957	8.4445	10.3199	10.1741	8.41755	6.99076	3.98533	3.87741
Mdh2	12.8659	8.92635	13.3967	8.71005	8.70302	8.58084	8.4374	8.44226	9.05329	7.60698	6.70281	7.84377	6.35865	8.9862	20.9299	6.41516	6.0311	11.7162	10.8813	9.45321	7.34027	7.71673	6.39324	9.24954	5.35074	15.4015	7.68473	12.3039	16.3607	12.5306
Acta1	11.0728	10.6483	22.2394	5.99856	3.37268	6.45548	4.9272	9.17816	9.31625	6.85629	7.58606	7.32431	6.36321	9.66261	6.18255	5.50871	7.96358	4.65878	5.31152	8.43217	6.78441	6.88384	22.5787	9.88934	8.99507	9.28252	6.4221	11.81	8.48958	7.38828
Psap	5.13525	9.76416	9.00741	6.13346	9.9469	6.44614	5.35268	4.73663	5.49396	8.83311	7.52717	6.99186	4.09911	4.05852	20.7353	13.4978	7.35998	10.8541	9.28938	11.4074	4.30914	6.11758	6.03959	7.42336	7.17291	10.3823	9.34844	9.20235	10.529	9.65939
Psma6	22.9885	8.88388	7.47338	8.18394	4.80023	5.72679	4.97658	8.55059	8.07189	6.18568	8.87657	8.24375	9.07466	9.1353	9.343	5.92485	5.79745	9.52302	6.51798	21.7009	11.963	10.6735	8.55444	6.66916	5.38504	10.7263	5.6051	7.81399	7.02939	9.09161
LOC100364062 /// Pkm	14.2338	15.0149	15.5692	8.79998	11.9588	6.21726	10.4242	11.0272	13.486	10.3545	7.41922	12.1033	8.47211	8.46615	14.2545	7.87783	8.43088	9.42475	7.38525	10.4987	6.17628	9.98219	22.5787	12.4358	14.2	10.1967	11.2201	14.916	19.6853	10.5829
Raf1	23.0587	16.2775	10.674	7.8242	12.706	5.4185	8.50958	4.84123	5.54091	7.52691	5.95206	8.30089	6.38604	9.12439	3.62738	7.06615	4.82877	6.13726	13.7491	9.07215	7.53981	6.93797	3.98055	5.6565	6.07103	5.04633	4.91684	9.0021	11.8383	9.51564
Vdac2	10.4332	5.8029	7.4533	16.1116	4.45377	8.52946	8.7641	6.94432	5.93066	5.38494	8.49874	8.38919	5.64655	6.46235	7.55309	6.62941	6.10411	7.56214	3.68492	21.3003	6.70839	5.60951	5.31656	9.15209	8.12472	15.0485	7.71444	12.1882	4.48916	10.0439
Ccnd3	13.4241	14.8142	14.9227	7.00131	11.1323	6.83384	7.84097	8.94282	9.34912	9.03329	7.91972	7.5217	8.9651	10.7827	10.5536	20.3991	6.42052	10.6352	7.83237	9.46298	21.3462	5.67614	6.0553	5.04636	5.32502	6.25925	8.66513	4.43208	2.85098	8.46634
Pank4	13.8234	8.79508	9.52143	6.83494	11.1908	6.54423	7.97393	5.00559	7.61641	9.28352	8.26321	7.7139	9.04727	5.91321	6.10905	5.56227	7.08252	5.14565	18.8987	8.41263	9.23591	8.01657	7.36382	5.56752	9.27805	13.9442	8.25415	5.01946	16.6714	11.4669
Cycs /// LOC100363502 /// LOC679794	14.0748	23.8332	12.7622	7.60836	6.05663	6.43213	7.89795	9.38735	8.01554	9.23348	8.83241	8.93982	6.91098	5.34226	10.6919	6.06906	6.71258	7.6068	22.5104	11.4074	7.82962	12.2476	5.37944	11.813	12.1549	9.16485	7.90755	11.316	12.8792	10.5829
Taldo1	12.1117	9.48617	13.2521	17.8158	14.7638	9.51506	13.3342	9.53303	11.3072	14.8036	8.06202	6.93472	4.44603	5.86594	9.47703	4.8742	20.0745	9.84016	6.39079	9.20406	7.54456	10.7026	5.18689	7.44031	9.19658	4.40365	7.40745	4.73467	5.02918	3.25214
Dap	8.41087	5.13883	3.75476	6.70004	5.07572	9.43098	7.25593	9.73475	9.40547	6.83627	6.693	10.9709	8.47668	9.00802	6.40737	20.3991	5.00888	14.9903	9.02727	10.6159	5.96248	13.4512	9.35998	11.8892	9.21802	7.73921	8.14522	6.80386	11.1746	23.6633
Actn4	7.17604	8.51323	11.706	8.44025	12.8521	17.4466	4.45613	4.30331	6.05275	5.84537	7.63512	8.69048	4.31366	4.59311	6.05285	20.3991	6.25015	8.77708	13.1169	6.98121	3.20691	8.06654	4.10236	10.8469	9.86543	6.30904	5.17927	4.75692	8.69774	5.39028
Tgm2	17.3578	7.20439	8.34481	7.8287	9.03277	7.99695	5.37167	7.34402	6.70075	5.2248	8.31718	26.6117	8.75056	10.9827	9.23492	6.34511	6.20634	8.34381	11.498	5.05148	8.24771	6.09675	9.34427	11.7198	8.34767	8.39093	7.52628	4.70797	4.61587	8.13573
LOC100911122 /// LOC100911158 /// LOC102550530 /// Marcksl1	6.69542	10.2043	6.09998	8.57964	11.771	6.3714	16.229	7.78108	7.03884	5.90042	6.58505	7.27756	13.4157	11.1755	14.0037	4.76295	6.68337	4.14064	4.81429	12.3649	8.2287	11.0816	20.5236	10.5927	8.51488	7.83425	10.1357	7.48025	8.52276	6.97502
Thoc6	12.9028	4.81451	10.0234	5.35104	21.9934	6.35272	9.27316	4.65072	7.59293	8.73802	6.67828	10.6592	8.05216	9.40077	9.55917	11.0009	5.87533	10.3494	23.4393	6.83953	8.37123	7.1337	5.93742	8.3767	8.85788	13.6726	7.96697	4.69462	10.1278	7.30563
Bcam	7.8674	11.1734	9.8186	8.55266	5.93558	6.33871	5.52363	5.53603	6.99188	6.72117	7.08065	6.08801	8.66383	9.98628	7.1683	7.58529	8.00252	8.77708	22.4718	8.71552	4.5942	7.46269	17.1089	6.91491	5.15352	5.35861	5.66947	12.2238	13.4765	14.331
Pabpc1	6.07801	8.02676	8.07575	5.91762	17.8527	5.95567	4.80183	4.7441	4.99621	5.82535	7.42903	6.5711	6.47277	10.5245	4.80337	14.6144	8.46496	5.52085	4.83356	4.28448	6.17153	5.38047	10.083	4.72858	7.9618	4.52585	6.32307	6.18978	5.3882	5.69932
Cd24	4.14074	10.1734	9.06765	3.18814	9.88429	5.71278	4.30417	5.02427	4.06177	6.29578	6.66356	8.99696	10.1245	3.55302	8.82851	7.85311	20.7073	8.35721	5.98606	10.0443	10.0531	8.39553	19.6041	5.22855	9.09797	6.81593	8.16998	7.4491	8.82445	11.7364
Idh1	10.215	7.17351	4.26477	5.00929	7.30886	12.0515	25.164	5.75643	8.0578	10.2144	8.48402	9.44369	10.1748	10.339	11.7123	7.38752	8.49416	8.43761	7.20023	6.66855	6.50885	8.51214	7.32845	9.32581	9.64248	7.78447	9.35339	4.27188	16.2641	9.59111
Col5a1	5.72679	14.9261	12.8304	16.4803	12.251	7.81011	7.66242	8.29658	9.60269	6.49096	8.68029	7.63599	5.65112	4.41127	10.2163	10.214	4.91152	13.284	9.9909	9.37505	7.87238	11.5439	22.1465	8.55042	10.6843	12.9123	8.12046	13.5098	5.18606	10.0116
Zfp36l1	13.938	15.6134	14.6616	6.11997	10.1264	5.52126	3.70394	4.29584	6.4331	6.26075	8.06202	9.11124	9.06553	5.47318	7.4623	8.38873	5.70009	6.32933	16.347	6.42428	6.72264	7.6959	8.07898	6.6734	7.22007	14.7407	8.42251	13.719	15.7302	8.22198
Fxyd1	14.2338	14.1269	13.9629	9.38005	11.9588	8.35663	9.89998	22.1553	6.96371	6.78122	8.40551	9.93198	7.57743	7.60426	10.1818	9.22101	7.80781	8.30361	7.82467	10.9481	12.4428	7.62511	10.138	9.31733	11.872	10.6358	7.28366	14.4399	19.6853	10.5829
Ppap2a	10.4591	7.0461	12.3245	7.13621	11.8378	6.81049	6.08207	21.143	5.46109	7.00643	6.61449	8.7684	8.55428	9.70262	7.41906	7.39576	5.83639	4.31037	5.73937	8.98422	6.08601	5.63866	9.749	7.54624	20.8499	12.6814	10.4774	12.0814	4.65509	11.1974
Coro1a	6.23329	2.86863	6.8429	5.18016	5.2886	8.40801	8.95025	24.3593	9.43834	4.98458	11.5312	10.1865	9.2116	6.04413	8.81122	4.55694	6.54708	8.11154	5.69312	8.79369	7.29751	5.52622	5.38729	8.47839	3.46426	8.97024	12.7501	6.65702	13.0029	10.3026
Mlh1	4.1925	6.05385	10.931	5.8052	5.06319	6.72641	4.1978	5.36046	5.65361	8.25257	6.49673	5.86464	9.15226	4.13489	6.5976	4.15316	6.57628	6.21319	4.32477	10.5329	5.14532	3.67304	9.45429	12.2621	24.2241	4.38555	6.01112	10.4928	9.03564	14.3058
Cs	11.9601	13.2158	6.23652	8.88991	9.61715	11.4956	10.7433	7.03024	5.68648	12.001	8.10128	7.92688	7.04336	19.0016	6.10041	5.73944	6.74665	10.9256	9.93694	10.6746	8.45675	9.21176	3.34004	5.72853	8.5749	8.53123	9.18999	5.81154	16.7559	4.28707
Parp1	3.8117	5.77201	5.2406	17.582	3.34764	7.68866	6.19603	20.6537	7.12806	4.98958	10.8393	6.0932	6.29474	6.26233	4.12458	7.07439	6.07978	4.92231	4.87982	7.23036	7.97215	4.93904	4.60926	6.08021	4.69905	3.91939	7.759	5.4244	2.73633	4.91594
Xdh	6.55493	11.7332	8.68214	7.37903	15.3983	8.85644	9.93037	9.27528	10.1145	12.5115	8.48402	9.50602	25.4529	10.8336	7.88599	5.30682	6.8148	10.001	10.7502	12.6629	7.80112	11.0608	11.2147	10.3215	7.95751	12.3329	9.92281	11.4451	9.3675	20.5406
Vamp2	5.93382	7.27775	3.91539	6.82594	6.58257	21.1275	9.62646	6.88829	9.75764	7.75712	7.59587	6.17112	5.87935	7.26605	8.12811	11.8909	8.95173	9.24609	23.4393	4.78767	4.44217	5.66782	5.65057	5.5082	3.97018	7.92024	6.02103	8.27232	3.84957	7.47812
Skap2	4.27013	5.6253	9.156	6.11097	8.91172	6.10982	5.45145	6.63054	6.43779	6.15065	7.28183	6.4828	7.27616	22.0673	11.3361	5.19558	7.69586	6.24446	4.10506	6.62458	6.64663	5.50957	8.0554	4.63113	8.27478	4.79288	5.97151	9.82533	8.84557	21.9097
Igbp1	6.42184	5.93031	3.96358	6.29084	7.33808	8.50143	7.11917	9.37241	9.40547	5.42998	7.43394	7.29314	4.15846	7.30606	8.34428	15.2159	6.35724	10.2243	10.4072	5.18339	16.8422	4.73914	9.10064	4.87688	10.2642	5.76594	5.615	11.5563	6.11829	2.33938
Ap2a2	22.8073	8.88388	5.73455	7.44199	5.64757	6.90858	4.53971	7.51585	6.91206	6.30579	7.59587	24.7364	5.87935	7.86974	9.27815	8.8708	6.8294	12.0333	10.4072	11.9936	4.73198	10.0322	8.45621	13.6137	11.7733	9.77132	8.44726	5.29981	4.96281	12.5306
Ccl5	7.89328	8.84141	9.46923	8.6426	6.01907	5.26902	5.51223	6.85093	10.1521	5.39495	8.44476	10.2021	5.65568	3.74576	7.4623	6.62941	6.9511	9.27735	6.1865	11.168	7.20249	9.54908	5.78024	5.97428	14.5259	3.96465	4.63956	6.32328	15.7302	4.52424
Cox17	4.55481	4.70255	4.68241	7.81971	7.55931	6.71239	7.45348	8.53191	11.0959	10.5597	6.23175	6.28021	6.22627	7.58972	8.96254	8.88316	5.36422	21.9271	6.77238	8.55919	14.9608	7.78752	7.04946	7.4276	4.60901	12.1791	7.85308	11.5207	10.8548	15.1539
Epor	7.29805	6.96888	10.6338	6.98333	9.09538	25.0699	5.81234	4.59468	6.8698	6.13063	8.51836	7.40223	10.0059	10.0445	14.1377	6.42752	6.96083	12.7793	23.235	6.82976	6.94119	9.26174	8.99847	9.81307	8.78499	9.49071	8.12542	4.22293	11.1414	5.9904
Sec11a	8.28517	7.45149	11.1478	7.14071	22.9826	11.5003	10.6294	11.2476	11.4857	11.3855	8.62141	5.67245	11.074	4.83313	8.13243	5.94133	9.29733	5.19031	4.186	8.90605	8.80832	13.2804	12.9672	24.1344	10.1398	3.91486	10.8785	11.1291	11.2138	14.216
Psmd1	6.90246	10.2545	24.0546	6.82594	8.50266	6.73575	4.83982	5.17369	6.59745	8.11745	7.46829	10.68	7.85588	9.99355	8.25781	5.47163	7.04358	7.34773	5.62374	7.64074	9.65875	8.57877	23.1367	13.0544	10.1141	7.05128	6.88754	13.5098	10.8126	5.66339
Camk2g /// LOC100909586	13.938	14.0883	19.332	5.71527	10.0346	6.60496	19.7088	9.90285	9.61677	6.37585	5.94715	7.87493	9.07922	9.33168	9.00145	6.32039	7.90517	6.46333	5.71625	5.9162	7.25475	10.5444	9.59575	8.3767	10.1827	15.2929	6.37754	13.2206	9.76874	14.2232
Dvl1	12.522	10.1348	10.1118	6.74051	8.46092	6.46015	6.52654	5.45385	19.7078	8.56286	8.71955	8.55023	6.313	8.10612	7.43635	6.08142	20.9798	6.79833	5.86272	8.3198	9.52572	7.22532	5.70558	7.46149	4.70333	11.8849	4.48606	14.4087	11.6302	5.35075
Nnat	6.03364	6.32025	7.46535	9.0473	10.0763	10.8744	6.46576	5.4277	21.4499	7.28669	9.00905	9.50083	11.3753	13.1356	14.0037	20.5227	10.3585	9.24609	11.498	10.1372	10.894	9.4533	7.01016	11.313	10.7143	9.1377	7.61541	4.01824	10.891	10.3386
Nucb2	22.8073	15.0149	14.0673	6.37178	12.4889	12.1776	8.44499	9.67125	8.36772	9.26851	6.99232	9.69303	11.6446	8.27705	10.6746	8.63183	7.00464	10.4923	10.4303	10.5769	6.58486	21.4219	12.8454	14.0713	10.1398	12.1293	10.2793	8.79741	9.97088	8.13214
Rab8a	12.5627	8.97654	8.45725	6.63259	16.1872	5.16158	8.95405	21.3298	11.4763	7.27668	6.04038	5.18935	8.53145	11.2737	6.73163	8.15388	5.8948	6.7492	5.49268	6.27283	6.0385	7.192	4.60926	4.80061	6.99712	4.20452	5.73384	13.274	15.4405	3.39228
Arhgef1	7.26108	8.43988	4.53784	6.37628	3.99462	28.0454	8.63494	17.5756	5.17935	12.3563	5.33379	5.80231	7.90609	3.62939	6.8743	5.09257	7.25776	7.178	7.80539	8.16347	6.33781	9.75314	8.57016	6.74967	8.69495	4.15926	4.91189	5.58015	4.30513	4.24754
Eef2	14.378	11.0382	8.53757	4.66305	3.32676	15.1811	8.00432	4.75905	6.11848	8.02737	7.49773	5.66725	6.75121	4.82585	9.26086	15.7557	6.52761	7.72741	8.4915	9.48253	8.79882	7.2045	7.53671	7.66064	7.32726	11.5454	8.70969	6.61697	3.95818	11.2369
Cyb5b	6.16674	11.2853	7.0196	5.94909	4.52056	6.02574	20.499	6.97047	6.9778	6.68113	7.80687	9.29305	4.25888	9.05529	4.15052	7.81603	7.7494	11.8591	9.3048	7.94363	10.1053	3.3274	7.56029	7.46149	6.82134	6.40861	8.91766	4.88597	9.47309	3.47853
LOC100912599 /// LOC679739	14.2338	9.55953	10.9912	7.38353	6.82049	6.87588	5.45904	8.17704	8.53677	6.30078	10.015	9.27227	11.1836	11.0518	11.1934	7.84487	7.92464	7.21373	6.24046	9.10147	6.81291	6.0676	18.8457	9.85121	8.90933	12.7357	8.25911	15.1207	19.6853	15.1144
Pdia4	11.6015	12.0189	10.4411	5.08124	10.189	7.18885	8.00432	8.1098	7.04354	8.65294	7.17388	6.24904	10.0515	21.3727	9.76238	6.50168	6.38157	7.49514	9.77505	7.64074	7.56832	11.1649	4.93934	17.9864	5.20497	13.5278	8.14522	7.11091	2.44369	6.41803
Psmc3ip	12.9583	2.94199	6.77464	4.24935	4.05723	10.6455	8.90846	9.6974	12.0163	4.13379	7.41431	4.04136	5.91587	13.9721	5.46053	4.44158	7.48655	6.17299	4.93763	11.4269	4.60845	4.69333	8.23223	4.66926	6.86421	4.29956	6.42705	7.83179	10.3872	11.0141
Lamp2	14.1524	14.5555	11.8546	6.72252	15.9868	5.72679	7.49526	9.0138	8.67764	8.00735	8.43495	7.02303	7.09813	20.5471	9.31706	5.50047	8.81056	7.75421	7.35441	8.79857	6.85092	11.1316	9.45429	7.57166	9.51814	7.73921	8.37794	5.3532	12.7826	23.6633
Ak1	12.9435	14.1694	10.9912	6.52467	14.0459	6.6143	6.91783	10.5902	9.92669	8.6029	11.7962	9.73458	7.7235	20.4526	8.09352	7.70478	8.53797	8.06687	7.18482	8.3882	8.72281	10.103	14.1932	13.2409	14.2	9.54502	8.49678	14.4399	19.6853	9.84984
Git1	9.47563	10.0267	8.9271	6.20091	5.73523	26.7468	12.9163	5.13633	7.07641	10.5447	7.30146	5.16338	10.6951	9.74262	6.37711	8.37637	9.34114	6.69113	18.3436	6.40962	6.85567	10.1654	8.90024	8.19875	7.02285	9.56765	4.68907	15.4678	11.0962	15.1144
Emd	14.3669	15.2813	23.388	7.17668	15.9868	7.698	4.5625	8.16957	8.97816	8.87815	8.91092	8.00999	7.43136	4.38945	7.75629	5.87541	5.07216	8.40188	5.90512	7.43067	8.11943	12.1185	8.14578	22.5709	10.6029	12.2153	7.21929	9.43374	8.07626	13.3859
Hspb2	12.9435	13.5864	13.5332	7.67132	8.58614	9.43566	9.17819	8.77472	9.95017	12.6216	8.07184	7.236	9.22073	12.1792	7.68712	9.71956	8.93712	8.36614	7.01522	6.77114	7.35927	4.80161	9.91011	23.0667	7.77315	14.7407	8.49678	13.2206	19.6853	9.84265
Sult1a1	13.5905	13.1386	15.4005	8.40427	14.7638	7.21688	11.355	10.4669	12.0163	10.1343	6.99232	9.12163	9.22073	6.70964	10.6919	8.34341	7.60337	11.5062	8.86538	11.4758	8.53277	8.35389	20.7594	9.85544	8.81071	7.92929	9.4029	7.10646	7.30091	20.5406
Slc25a10	5.89685	9.85682	8.43717	17.9687	13.9332	4.73184	10.1849	11.7407	12.5281	8.52282	6.92362	9.02293	4.44147	10.0336	10.5536	4.61051	6.60062	10.4521	8.76902	10.7478	21.3462	5.67614	7.56029	9.67749	13.8485	5.09158	9.8931	5.00611	4.68827	5.10999
Rho	3.21646	3.22383	5.49761	5.58936	6.31543	5.7735	14.6106	6.05153	4.45151	5.87539	6.7666	3.50632	6.25823	4.98587	6.85701	6.39456	6.0311	4.81958	11.2976	5.16385	7.76311	3.64806	4.20846	5.98699	5.66801	6.28188	5.95666	5.05506	8.02497	8.24354
Tnp2	3.36435	7.24686	5.76266	7.87816	3.52712	4.82526	4.78664	6.62307	4.62995	3.58829	3.43482	4.48289	22.7871	5.16043	5.25301	5.92897	7.18961	4.52031	4.2284	5.98459	6.21429	3.88543	5.46195	5.58023	5.09349	3.82887	7.57085	20.8788	4.26591	3.2198
Gja4	13.4241	8.59817	9.61781	5.71077	9.56706	5.94166	4.10663	4.56106	6.23118	7.21162	7.68419	10.9293	3.93022	8.85164	10.0996	6.74477	6.97057	22.0477	8.2795	8.53476	7.36403	10.407	5.27727	9.58427	7.52877	5.15947	8.77406	5.77594	12.3754	6.02274
Pip4k2c	9.95255	8.62906	7.58582	8.84944	9.34583	6.6143	9.00344	5.18863	6.88858	9.75395	8.38097	9.89561	11.2748	19.3216	9.29977	7.00023	7.27237	5.52532	4.93378	9.51672	7.15973	6.43824	9.14386	6.46578	7.03571	11.3689	7.38269	5.31761	11.2953	21.9097
Cryab	13.0951	13.8258	12.1638	16.8715	16.2373	7.36635	5.34888	4.93461	6.3251	9.46369	7.04139	6.62305	5.37267	7.58608	6.81378	6.90546	10.266	5.53872	6.279	9.50207	5.21183	9.395	4.84896	7.36404	9.81398	12.8534	5.95171	6.65702	18.0562	8.78616
A1i3 /// Cpamd8 /// LOC100911833 /// Mug1	15.8235	4.37051	4.54587	6.33131	4.05723	6.5816	9.03003	10.0971	10.138	8.10744	6.87946	5.06988	5.08053	4.67311	5.86261	8.33517	4.70708	9.25055	11.101	8.16836	4.92677	18.0904	3.35183	5.57176	5.04204	3.48038	5.98637	7.37345	8.23314	4.47393
Ctbp1	11.1948	13.0922	15.5692	6.31332	12.1007	3.93775	5.6262	5.9955	6.94493	7.71208	6.93344	9.32941	8.45385	9.86627	8.81986	6.23387	8.1875	12.0824	9.15447	8.71552	7.19299	10.8192	19.5059	6.38951	6.80419	11.387	6.63997	9.3314	7.04146	23.6633
Gclm	6.4736	14.8142	11.4611	8.44025	4.30768	5.50258	4.09903	4.87111	5.08074	5.80032	14.6961	10.628	5.29051	11.0191	23.7747	7.3422	5.79258	8.19641	6.70686	4.60203	5.98149	4.39349	7.63888	3.76253	9.16228	12.2832	5.52588	4.53443	7.77759	11.5891
Myl1	14.1229	14.1269	22.2394	7.48246	3.90279	6.00706	8.82489	6.10757	6.11379	9.52374	7.56152	8.77359	5.34528	8.57162	8.11946	8.72659	8.46982	7.18247	8.98487	7.65539	5.14056	8.12484	22.5787	10.3258	8.99507	9.99761	8.066	15.4678	8.48958	10.0619
Cdc25b	5.41993	4.88015	7.09188	6.94735	5.54739	4.61973	7.59784	7.71757	17.5055	8.56286	6.62921	7.82299	6.04368	8.17158	21.319	5.08845	7.97332	7.02613	6.21733	2.40849	5.22133	4.99318	8.24402	5.41075	6.72272	5.29072	7.45696	4.62342	6.25707	4.05709
Kras	5.956	12.9224	14.1034	6.93836	10.1264	8.44071	8.02331	9.38361	10.7531	6.24073	8.28774	8.36322	12.4799	20.889	8.7896	5.19146	7.80781	8.23661	7.28889	9.22849	7.15498	6.10925	7.15555	4.51672	6.71415	5.65279	5.45656	4.28078	16.7559	4.91594
Fbn2	5.23507	11.2351	11.7422	8.39978	8.64458	9.42164	8.03471	9.51809	11.6923	13.5324	7.50264	9.44888	9.77306	5.22589	7.26774	6.80246	8.31406	19.4882	7.11158	6.31191	8.03867	10.1862	7.57208	10.2325	9.56102	14.4601	20.6676	11.6008	12.1491	10.971
Stmn2	9.25011	7.19281	8.38898	8.79998	20.8747	5.23165	8.33862	4.8487	5.26856	8.42774	5.98641	6.81525	8.25301	17.4305	7.13804	5.08845	8.42601	6.6688	5.91283	6.85908	8.09568	9.17428	10.0555	6.99542	7.40872	9.8211	9.80893	5.5223	8.80937	13.0157
Alcam	4.19619	11.4321	4.16036	6.49319	10.5521	6.65167	5.12854	4.54612	7.90285	6.9714	5.52516	7.86974	5.58721	17.2814	7.04292	8.75955	7.7348	7.245	8.01739	7.1522	6.56111	5.75527	7.73318	7.09287	7.12575	15.3019	7.52628	14.5734	18.6867	9.72766
Faim /// LOC100362113	11.4795	24.2926	13.5613	7.2936	15.9868	5.52126	6.04028	9.49941	9.12842	8.37269	6.48691	9.53719	5.70589	5.61137	4.95901	7.19799	5.49565	5.47172	4.55989	10.4987	9.85829	9.395	9.02598	23.8505	6.65413	9.34136	9.63562	11.3294	8.07626	9.40784
Enpp1	7.97092	12.5401	14.6616	6.52017	15.4776	6.38075	5.75916	7.52333	8.25502	6.63109	8.71955	8.66451	8.13432	18.9979	9.87911	6.65001	5.94348	6.54373	7.95572	11.1387	8.48051	13.5594	8.5348	8.61822	8.53632	12.8398	9.63067	10.0745	12.7434	23.0381
Lpar1	11.0136	6.35886	22.4884	7.43299	9.87177	6.27331	5.5996	5.2484	6.84162	6.27076	7.6204	6.48799	11.389	6.63691	7.23315	9.39406	6.74665	10.6352	7.61652	6.8835	22.2251	4.78495	5.14367	9.61393	6.88994	5.99675	9.76436	10.03	9.07787	8.20401
Smpd2	4.76924	6.18126	7.22039	5.07674	4.74179	15.1811	4.39155	7.5943	4.26838	6.71616	4.77441	4.32706	11.5305	6.56418	3.63171	9.88849	6.24041	19.7831	6.88802	8.35889	7.06946	8.39553	4.71143	5.86412	7.59308	5.91076	4.59004	7.59149	8.13358	12.0275
LOC100911104 /// LOC100912078 /// Ly6c	11.9786	14.8335	14.0472	7.57239	7.08346	8.42669	8.31203	13.9372	6.24527	5.68522	8.44476	9.11643	6.05738	4.81494	8.30105	5.6282	5.33988	10.7067	8.7536	8.68132	10.2194	7.46269	7.40311	6.89373	3.15128	8.36378	5.55559	14.164	19.7547	14.4495
Slc25a11	12.9398	11.0151	9.22025	6.83943	13.1443	13.3874	11.4044	4.79266	6.85571	13.2672	8.01296	8.45672	6.79686	9.26258	6.61922	5.95369	8.45522	9.60789	14.809	9.30665	5.10256	6.1967	9.86295	9.7707	9.50528	15.2929	8.05609	15.2408	19.0789	9.55517
Rab3b	10.3592	9.31629	7.4774	17.3571	11.5164	11.2434	10.9333	5.41276	5.93535	12.3714	6.06001	7.32431	10.6723	10.8009	10.2423	7.38752	6.07004	8.21874	6.39079	9.3897	6.96969	11.4939	8.96311	6.96152	26.3893	5.14137	8.81863	10.7198	7.67803	9.31081
Higd1a	13.2245	21.451	11.698	7.84219	13.5951	6.2266	9.59607	8.82328	11.6124	9.99918	7.28673	8.72684	6.61884	6.1205	8.13676	6.73653	6.54708	7.13333	22.5104	10.8211	8.38549	7.91662	7.2145	8.4445	9.17943	8.36378	8.17493	6.14083	13.567	9.84984
Psen2	20.907	7.54801	5.73856	7.06427	10.7442	7.8755	8.00052	9.63389	10.077	6.05055	8.19942	9.35019	10.0013	3.87668	8.0719	7.46169	6.20634	8.55821	17.0716	7.51372	7.04571	10.2279	7.19092	9.66054	11.6533	13.3694	4.67422	7.86739	11.2953	8.66039
Hpx	4.54372	4.88401	4.49367	7.21266	6.30708	9.25815	25.164	5.03921	5.38126	13.5074	6.85493	6.34774	11.6446	4.69493	3.80032	7.53997	7.57903	9.88483	7.82467	5.4814	5.34011	7.36691	6.28321	19.4948	9.79683	5.30883	7.33813	4.52553	8.04911	7.8231
Keap1	6.78785	5.14269	4.73461	5.84117	6.72449	8.54814	7.51046	8.87932	10.2976	6.4309	4.66155	6.2854	8.8236	5.14952	12.0408	8.41757	9.17077	7.78547	14.5161	8.19278	5.44463	5.85938	23.231	8.21993	7.77744	8.63985	5.4417	7.04416	7.38237	9.04849
Me1	8.44045	7.51326	14.2279	17.9687	13.4865	14.0367	9.22757	7.65033	9.49938	8.96823	6.42312	9.18915	5.58265	7.77155	8.18431	6.88898	7.12147	11.073	5.86657	11.6516	9.59699	19.0399	11.0614	11.4613	13.5226	8.09222	9.57621	12.8512	4.49519	7.99918
Pla2g5	8.89149	10.6676	6.63007	5.54889	10.7442	9.07598	5.21212	10.6761	9.64495	9.46369	7.78233	8.60217	10.7088	9.96446	9.96558	6.5264	6.37184	6.9234	22.7301	8.15859	9.94856	8.16232	5.77238	7.49963	8.83644	15.3019	7.33813	27.2689	8.21504	7.20142
Synj1	9.61612	14.7949	14.6616	7.88266	16.2373	12.8129	9.68724	10.0448	10.7484	9.29853	6.44766	8.17622	9.49461	22.0673	14.2112	7.81603	7.85162	10.6531	9.18531	12.9902	5.22133	12.0561	8.79414	12.8341	13.5483	11.6179	7.27376	7.95638	13.0964	23.7604
Mme	5.1981	6.1774	9.5375	7.44648	4.88788	3.59209	8.99964	4.81134	6.50353	9.41865	7.9001	9.06449	16.6247	5.9023	8.24917	8.0344	6.35724	4.40864	4.20913	5.97971	6.40908	6.23835	6.04744	6.74543	7.01427	7.38619	6.35278	8.36132	18.0562	8.33697
Dhfr	7.07992	6.799	12.7019	7.5544	8.48179	7.81011	5.40966	8.47588	11.5655	7.70207	7.32599	5.9062	8.36712	8.93528	11.9976	5.37687	7.10686	8.24554	7.90561	5.57422	7.78686	19.6062	5.64664	5.84293	9.00365	9.16033	11.5519	9.2068	6.36567	9.49408
Tgfb1	6.01886	9.95334	8.09985	5.78721	3.73165	5.55863	19.762	4.70301	5.63483	5.06465	6.17778	5.19455	8.74143	4.53492	6.24308	18.3637	7.8857	8.46441	11.3438	12.0034	8.99836	10.1862	8.189	6.97847	9.24803	5.9696	3.99586	10.564	5.96443	3.60071
Ccr1	21.6612	11.6676	12.3405	7.11823	8.13951	7.64195	5.75536	6.01791	5.879	8.1675	7.34562	8.84631	7.48613	5.98958	10.1083	7.82427	6.3475	7.22267	11.8719	12.0229	7.40203	24.7202	13.1794	9.44021	12.2621	10.9661	9.76436	12.8913	10.8126	5.6598
Rasa1	12.6662	25.366	10.674	8.26038	12.9982	6.45081	4.11803	4.10533	7.20788	5.84537	7.52227	6.10359	7.48613	6.0114	5.83667	10.7331	6.0165	10.9658	12.1957	6.27772	10.8798	12.4142	13.034	8.525	24.044	8.0877	5.66947	12.0547	6.23595	3.9385
Fgg	15.8235	7.04996	3.5098	6.15594	5.45139	8.62755	7.18755	3.22001	4.93987	6.01052	5.61348	6.5763	7.91978	7.02603	4.86389	9.90909	3.83089	11.5062	11.9991	6.47313	5.10731	4.69333	3.23395	6.6734	7.86319	3.98275	5.98637	3.96039	16.2641	6.9355
Rab2a	5.93013	5.06547	5.56588	6.80796	5.38877	8.69295	4.34216	5.03921	6.78527	7.96731	4.83329	9.78133	4.04434	8.38251	23.1738	8.12092	7.89057	13.6235	6.94969	9.37505	7.37353	9.19927	6.17712	9.36394	5.03347	4.72499	4.75344	4.81477	16.6503	10.7267
Ppargc1a	11.8713	9.22363	5.57391	6.57413	25.8836	6.09581	5.69458	4.42285	6.99188	5.69022	5.58404	9.12163	4.97098	9.85536	11.5782	7.74186	6.78073	4.35951	5.64301	9.80985	6.40908	20.614	4.5739	7.0166	10.7486	15.2929	5.59025	10.9022	3.01691	4.12177
Lcp2	5.48278	5.05775	6.04376	8.39978	9.20391	8.08103	5.22351	24.3593	9.43834	7.94229	10.643	9.49044	7.6322	5.91685	7.0948	8.16212	6.88782	10.7826	5.06869	10.8846	10.1006	9.0202	7.51706	4.87688	6.88136	4.07779	10.2991	4.51663	15.7302	2.95387
Ltb4r	7.87849	13.5169	11.1398	7.21266	8.54857	8.38933	8.72991	5.5435	6.56927	7.58196	6.28082	6.56591	8.65014	6.4078	5.75885	6.08554	19.4611	5.82905	6.14024	5.15896	5.76769	9.10349	4.11808	19.5372	8.09042	12.1338	10.1902	4.49438	5.75626	10.0223
Prf1	9.10962	5.47472	9.64994	17.0559	9.88012	8.79104	8.29684	21.9574	9.43834	5.96548	11.8403	6.53994	5.73328	6.99694	7.03427	5.33154	6.58115	6.7358	5.78948	7.10823	8.51376	10.2737	7.06125	6.68611	6.49978	4.82908	9.06125	3.66225	3.925	4.36972
Cxcr4	10.6883	6.62912	5.67833	15.2887	8.46509	5.83422	5.63	21.9574	9.1519	5.47002	10.1278	6.30618	6.07107	3.88032	4.23267	4.35505	6.77586	7.513	9.6941	4.32356	7.80112	4.48095	8.6291	7.45302	4.48467	4.39008	5.19908	6.81721	5.18305	6.51505
Pik3r2	8.44414	10.4128	4.26075	9.15522	13.0065	17.5214	5.29569	5.87223	6.00579	4.50914	7.07574	5.67764	6.86077	8.14249	6.55005	5.70236	8.1875	4.95805	11.2976	8.19278	4.12861	11.0608	10.5349	8.02503	8.36911	10.672	5.84277	7.2177	9.40672	3.72648
Pde6h	6.99119	4.50564	3.90736	8.17494	7.85567	6.49285	4.9158	24.3593	9.43834	8.62291	9.20533	10.2488	7.91978	8.13158	4.32779	6.4852	9.4239	9.08528	11.0586	6.58549	6.52785	4.46013	7.11626	15.0501	4.18027	8.63533	12.7501	5.21081	2.66695	7.1547
Lfng	9.22793	11.2158	4.21658	4.91486	5.79366	26.7468	7.65102	11.8304	14.5285	6.3208	6.34461	8.68528	5.70133	6.626	7.03427	20.3991	8.91765	9.24609	12.0145	6.5171	9.654	5.96766	8.0554	11.6859	8.70781	9.83468	12.0371	7.14651	4.73051	9.05567
Kcnk4	5.10937	4.73343	5.52974	3.79069	5.28442	7.19352	6.33659	6.88829	4.73326	6.44592	5.85392	5.39714	5.29964	4.20398	4.6996	5.50459	6.54221	7.1914	9.25469	4.48967	6.69414	8.0124	16.2758	8.59703	9.67678	6.63943	7.25395	23.3574	2.37431	5.91494
LOC100910229	14.2338	7.99974	9.59773	6.05701	7.11686	9.25815	21.4525	3.04071	4.53134	8.76304	5.82939	6.34254	6.03455	6.94603	9.31706	9.17157	7.08252	6.83406	6.52569	8.44682	8.00541	8.7037	16.7552	3.70744	7.17291	5.00559	5.13471	10.4439	3.78622	10.3781
Pten	21.6612	13.1231	12.3405	5.49493	12.5015	3.16702	10.0557	5.46879	8.26911	11.1302	7.61059	10.3216	5.78806	7.08786	8.98848	7.16503	6.01163	19.9037	7.36598	10.6843	5.34011	4.01453	7.53671	12.9443	10.7572	6.49912	10.3982	13.1004	7.30393	8.13214
Birc3	6.4662	3.65625	4.1724	3.76821	3.52712	5.16625	4.86261	21.9574	9.43834	6.88632	10.5106	7.09575	7.16204	3.62575	7.63091	6.73241	5.94348	5.99432	5.35392	7.83615	6.24754	3.38986	5.68593	5.97852	6.82991	8.97024	10.6705	10.3816	8.71886	10.3026
Lst1	3.02052	3.88018	7.81874	15.572	4.01132	7.03937	3.81031	24.3593	12.5985	6.72617	8.15035	7.30873	4.54646	6.11323	4.09864	5.94957	6.89755	9.67936	8.50691	8.30026	4.55619	3.48564	5.98064	9.97408	6.01958	4.61637	8.18979	6.62142	4.70336	4.68236
Mt3	10.7696	13.1772	7.90709	17.6359	9.01608	6.75911	5.5996	8.8457	9.01573	7.7321	6.17287	5.61531	5.41375	5.9314	7.40609	5.55815	5.92401	4.96698	7.23492	9.13078	6.32831	8.01657	18.3349	9.63088	7.62309	6.67111	9.28407	11.8189	11.0539	10.6799
Rhoa	5.10937	5.35504	10.433	5.67929	7.28799	6.46015	7.20275	4.92341	5.4517	8.00235	5.38777	7.64637	11.4529	22.0673	9.76238	14.3424	6.97057	5.76652	7.65892	3.33183	5.98149	6.80471	5.15546	3.78795	6.15249	6.653	6.20918	4.10724	3.04708	4.21879
Cav1	9.41278	11.3162	3.80295	7.16769	5.82706	7.2776	3.95847	7.16098	6.84162	7.56194	7.57624	23.23	7.74632	3.70576	5.02819	5.27386	9.57479	6.34719	6.02461	7.66028	6.15252	6.96712	6.4954	4.69045	10.1827	10.9526	4.13946	7.65824	6.42299	11.4561
Fkbp1b	4.46978	2.93813	5.96746	5.40949	3.81931	9.07131	8.99584	4.64324	3.08037	4.79941	5.56932	5.37116	20.911	3.44392	5.29624	7.7295	9.32167	4.27017	6.56424	6.41939	4.82225	7.81251	7.8157	8.49534	5.45364	3.6931	6.54093	5.549	12.1702	4.33738
Rgs19	10.2779	3.36282	3.90335	7.2846	11.508	23.9722	5.29569	10.9525	28.0474	5.07966	6.78133	6.60746	9.15682	7.1715	7.06021	9.99149	5.34962	11.8502	10.7657	5.32507	5.70593	8.87028	7.8825	5.52091	10.0455	4.07327	7.37774	7.56034	12.8701	11.3447
Cav2	10.655	15.042	11.4932	7.91863	3.2558	10.2204	7.99292	4.81508	6.67727	3.68338	5.53007	7.45937	6.08477	2.16381	4.80337	8.29397	8.70834	7.42367	4.36331	10.2837	7.16923	5.05564	17.4468	5.98699	6.51264	7.28662	6.27355	9.78973	10.1127	15.6929
Trpc6	9.93037	11.5749	24.6529	7.13621	12.7686	5.05882	4.66887	9.39482	6.16075	5.95046	7.30146	7.41781	7.91522	7.6079	14.6047	5.24502	9.41903	4.70791	4.98003	11.2168	8.14319	6.30914	11.1833	3.77947	9.09369	8.61722	7.55104	9.86093	9.75668	9.08083
Rhox5	13.9195	16.123	8.11189	17.4246	14.0459	6.48818	4.97658	4.94956	6.03396	6.02553	7.0463	7.77104	6.71926	4.88768	6.64948	9.34874	5.7293	8.96915	11.0547	8.30515	8.42825	7.55015	7.25772	6.24969	3.72151	11.5636	9.37319	13.7946	19.4862	13.6338
Thrsp	9.09113	13.3393	4.83099	8.84045	3.76922	8.10906	7.62443	6.5633	5.64892	5.29986	4.79403	6.71655	6.45451	4.32763	6.99969	15.7145	5.593	8.56268	7.95572	23.4645	7.31652	8.02073	3.95304	7.38946	4.1674	4.58469	9.35834	5.04171	9.458	3.62586
Gdf15	19.5761	4.28171	4.01177	6.16493	5.12998	13.1445	8.66153	4.94956	5.19343	30.493	5.96678	5.66725	6.73296	7.58972	7.13371	8.25277	7.30157	10.202	7.127	5.84292	6.16203	6.91715	5.43445	4.94043	6.63698	3.5709	3.87703	5.28201	3.9974	4.90156
Lyz2	7.41266	8.65222	7.02763	9.50596	13.4865	6.95996	4.98418	14.124	6.41431	6.93637	8.83241	6.59188	6.34952	5.07315	7.78223	3.5681	7.27723	11.3365	7.9403	7.9192	7.05046	7.46269	5.86276	10.4444	10.5814	3.52564	4.70888	8.52152	15.7302	5.33279
Col1a2	14.3854	13.1501	11.7422	5.81419	13.1443	11.9674	12.563	8.53191	9.98773	13.2071	6.63903	8.10869	6.73752	5.57864	6.67975	7.16915	6.8002	11.1221	9.31251	11.9936	7.97215	13.3221	22.1465	10.2325	12.6051	11.5319	9.26426	13.7946	13.0029	12.1641
Prnp	10.13	10.8645	12.5373	18.4903	14.0542	12.8316	12.1337	6.14119	6.66318	11.5956	9.28875	9.98912	22.5725	12.0883	12.4818	4.35505	9.78411	9.08082	8.21397	11.3048	11.6019	11.9811	9.70185	12.3977	12.3479	12.6543	5.52093	12.3084	8.93608	12.0275
Myh10	13.4796	8.92635	13.3967	8.3683	10.7233	9.23947	7.84856	5.07656	5.98231	6.71616	9.28384	8.39439	7.81023	5.73865	9.85317	5.73532	7.97332	8.88875	7.58569	9.11124	8.08142	9.82394	13.2502	7.14795	7.90606	10.2556	9.5564	12.9536	16.3607	12.1641
Ccdc80	22.8073	9.9572	14.0673	5.59835	13.3488	7.96425	4.52451	11.5016	11.0349	8.37769	6.56051	11.6773	25.4529	8.31341	11.1934	7.04555	5.23279	11.3812	9.98319	10.4987	7.30226	9.56574	4.61319	8.85126	12.6051	5.55775	11.2647	9.26465	8.87876	12.1641
Odc1	10.3297	11.9803	7.85488	6.80346	7.20451	7.20286	3.46841	19.1221	5.19343	6.00551	6.77642	11.7708	10.1245	5.87321	4.00785	5.6488	6.37184	9.23715	23.235	11.9838	11.5496	12.6266	10.1419	7.16914	4.09452	5.22736	9.19494	7.2978	6.23896	7.25891
Smpx	12.6995	11.8799	11.5494	7.32957	11.4454	7.04871	6.37838	9.6451	9.45712	6.76621	9.00415	9.15799	9.68176	5.29498	7.38015	9.15921	9.09289	5.52085	6.64904	7.46975	8.78457	6.09259	22.5787	10.0037	11.5804	11.7944	7.96697	8.45922	19.0789	10.5829
Ywhaq	13.9306	15.042	14.6295	7.17219	10.022	5.88094	14.6866	8.05003	5.78979	6.57103	8.92073	9.78653	8.83729	6.89511	8.78528	6.85602	7.70559	8.79495	8.34888	7.70425	7.80587	9.36585	4.73893	11.0757	12.5365	14.0528	10.7695	15.1296	9.87735	23.0381
Zfp384	7.58642	7.07313	5.21249	17.3571	9.37087	6.25463	4.43334	6.30555	4.22612	5.41997	8.83731	5.63608	23.0107	10.6154	10.5363	8.91612	7.04845	9.84462	9.48211	9.53138	6.84617	4.60172	11.9534	8.84278	11.7691	11.4187	11.6855	6.55467	6.09114	5.91853
Trak2	9.31296	4.80679	12.7622	5.93111	3.27668	5.54462	5.85033	9.22298	8.42407	6.95138	6.82058	5.49583	5.67394	16.0522	3.80897	7.24744	6.62496	3.69397	4.0588	6.42428	6.45659	4.53092	7.32059	16.7153	6.71415	9.94782	5.2585	9.65624	8.12453	2.72748
Dyrk1a	6.82112	13.1231	11.3446	7.58588	8.85328	5.96969	5.48564	5.3119	5.84613	6.55101	7.06592	10.2696	13.0049	20.889	10.96	5.76004	6.79533	4.96251	6.279	11.251	10.2384	8.67871	10.2166	8.23688	5.17495	9.95688	9.70495	10.2881	19.4862	9.84265
Cfl1 /// LOC688430	4.99107	4.69869	6.0036	7.84669	3.51877	8.22584	11.3018	5.00559	5.89309	9.81401	4.96577	8.05674	8.82816	21.3727	13.0525	13.4195	7.60337	11.609	7.95957	8.95979	7.34027	8.67871	5.92563	6.16071	3.80726	7.71658	10.0367	10.168	4.32624	9.5408
Cntnap1	9.03937	9.0885	11.947	8.93488	3.72748	7.81011	4.9044	9.39855	12.7206	5.35992	7.27201	8.50347	7.29442	7.21514	9.85317	15.7145	4.45396	7.07527	8.65724	6.78579	5.21183	9.41582	18.7042	4.44469	11.0102	8.21442	7.72434	7.52919	6.96604	5.78198
Psmb9	8.68076	7.99974	5.35305	8.9079	9.06199	5.06349	4.9234	21.9574	9.43834	5.8804	9.90702	8.50867	5.37267	3.44756	4.0165	7.53173	5.59787	11.4437	11.3323	6.48779	7.00295	4.20193	5.46588	6.16495	6.88994	3.61163	8.11551	8.02313	11.7991	4.1038
Pccb	4.07789	8.30474	8.41709	6.39876	8.09777	8.59485	5.38687	24.3593	10.9081	9.19344	5.42212	8.02558	7.78741	7.57881	3.943	7.76658	7.35998	7.82567	7.6011	7.57723	5.85796	7.29195	18.4017	5.3133	5.37218	8.79373	7.88279	6.53687	7.96463	6.27788
Tra2b	3.25713	7.37813	3.0279	5.89963	6.93737	5.38113	5.35268	21.9574	7.6258	5.63517	8.73427	5.35038	5.53244	7.68063	7.66982	6.57584	8.29459	8.47335	16.0117	6.01879	5.10731	6.90882	7.54457	4.4913	6.02816	4.96033	6.51123	5.82044	7.06258	6.44318
H3f3b /// LOC100361558	3.23865	7.35497	11.6137	6.97433	5.26773	8.55749	5.33368	12.4804	10.077	4.50413	6.73226	14.2642	4.61949	3.44392	4.00785	6.61293	8.67427	7.08867	4.74876	6.18001	24.192	13.0139	8.13792	12.3596	10.0669	7.97908	9.02659	7.05751	9.34638	5.0453
Azin1	8.90998	14.0883	7.62598	5.91312	10.4603	6.81983	5.39826	7.36643	6.47066	6.02553	7.48301	9.15279	9.94652	6.56418	5.49944	9.70308	10.3585	26.4965	8.91164	11.4758	8.96986	7.84582	5.15153	8.16485	7.95751	13.9442	7.27871	4.76582	16.6714	11.2369
Stx12	5.76006	5.84151	19.1955	8.12098	9.74237	6.10515	8.47159	4.44526	5.86022	8.46777	7.48792	6.6698	6.77404	10.0117	6.01826	14.2559	10.6506	3.89944	4.94149	10.8211	8.08617	11.4189	11.7609	7.56318	6.27683	10.4095	5.78831	9.04215	5.15288	9.31441
LOC100365697 /// Ptp4a1	9.05786	12.7795	9.60978	5.63433	7.10851	6.57693	7.19515	5.98056	5.48926	6.68614	7.86575	9.13721	9.27094	6.1896	7.25477	7.11147	6.70284	6.90106	4.71407	6.05787	7.16448	7.90829	17.1443	9.30039	7.34012	25.3629	9.32863	5.5223	11.8595	15.0856
Pias3	3.16101	5.83764	7.36094	6.17842	8.98268	11.5844	9.01103	21.2439	9.89382	6.9714	6.00604	8.39958	10.9599	17.1541	10.2163	10.4324	9.35088	4.53371	8.33346	9.34573	5.25459	7.40439	8.72734	5.20313	12.2621	7.0377	7.98677	6.08298	5.52697	7.52483
Trdn	13.9306	15.0343	11.5494	8.08951	15.4776	7.26359	4.81703	4.9757	6.53171	6.62108	11.7962	8.84112	7.68242	8.57162	5.43027	8.72659	8.34813	5.44045	7.58183	7.46975	9.34994	4.87657	22.5787	9.27073	8.99507	9.58576	7.96697	14.4399	19.0789	10.5829
Nucb1	9.90449	11.1927	11.1197	7.11373	8.15203	14.0787	5.65659	6.09262	10.1098	5.85537	8.28283	8.84631	8.14802	13.1647	10.6314	20.3991	6.73205	8.31254	11.7717	9.01353	6.62762	10.4195	11.9967	7.52929	8.27478	12.7131	9.67524	12.1304	11.7177	7.97402
Glud1	6.0854	11.7216	8.0115	6.36728	7.72628	6.30601	13.8888	3.47403	7.11397	6.07057	9.43105	7.3399	9.54026	14.0121	7.45797	7.00023	7.63258	11.5911	11.1858	11.9887	6.05275	13.1846	9.26175	12.4612	12.8967	9.58123	7.52628	7.34675	8.18487	4.39847
Pgap2	8.28517	7.71789	14.1998	9.38005	15.5319	9.42164	9.4631	10.5752	13.9133	5.29486	10.2407	5.41791	9.6772	14.0121	9.49	11.2399	5.26687	9.74636	8.6264	8.5885	7.79636	7.92911	12.1263	11.1266	3.59288	10.8077	9.64553	4.40538	13.2653	23.0381
Atp5g2 /// LOC100361833	12.9398	14.1926	11.9952	7.68481	14.0793	5.82488	5.56162	4.92714	5.72405	6.3158	7.5468	8.384	6.7923	18.3433	7.12939	7.39988	7.18475	9.41582	5.99377	10.8113	6.43283	11.4023	11.4898	4.91077	12.2192	14.0437	8.66513	9.83868	19.0789	9.55517
Klf9	3.13143	14.9261	12.9911	6.8799	8.13951	7.8428	12.3541	11.5054	29.4185	9.18843	8.73427	9.17357	6.91098	8.03703	7.77791	5.60348	8.46982	5.34665	5.12265	6.9177	9.29292	4.58922	9.1085	5.68192	6.98855	4.04611	5.23374	7.72499	15.4405	8.51665
Ybx1 /// Ybx1-ps3	6.92094	4.85698	8.01953	19.2233	4.16159	8.67893	8.68053	11.2103	11.0959	5.19477	9.4654	8.45153	6.95663	21.3727	7.87735	4.58991	8.66453	9.82676	8.66495	10.5475	10.5092	12.4684	5.31656	4.05488	4.96487	5.45818	7.2391	8.41472	7.54528	7.67217
Pvalb	12.8104	13.7022	23.3237	7.71179	10.0846	10.2064	4.9272	10.3997	12.4154	9.49872	11.2417	9.40213	9.33941	6.50235	9.62835	9.15921	8.70347	5.70399	8.13688	8.88651	9.68726	6.63397	22.5787	11.0503	14.2	13.1702	8.2294	15.4678	9.76874	15.1144
C1qb	11.0136	7.12718	23.388	8.18394	12.3888	11.5797	7.29012	9.37241	27.1693	9.44867	8.40551	9.7138	8.38082	3.39301	6.22579	7.99319	7.23342	8.92002	8.33346	11.0068	8.9461	9.88224	9.6154	3.58033	6.38402	4.19094	5.63481	7.06641	7.81982	10.6871
Ddr1	7.06143	11.1618	22.9502	6.59661	9.32079	11.192	11.0586	11.356	6.4284	11.8259	10.0199	6.3841	8.29409	9.45169	12.3262	5.89189	8.37734	6.36059	5.10723	11.2608	11.103	6.14673	11.9927	7.02084	10.1913	7.52649	6.54093	6.06518	11.6694	13.6338
Cyba	7.51248	10.602	8.44119	5.90413	11.2367	7.79609	4.47513	7.82217	22.3421	6.49596	7.15425	5.06468	7.83762	8.79709	6.99536	11.2811	9.73543	11.8502	11.6676	7.17174	7.01245	5.45959	4.99828	9.03769	6.30255	4.37197	10.2991	12.206	4.89041	10.4823
Scpep1	4.21468	6.11563	5.96345	7.34306	7.32974	5.7408	12.1945	8.00147	8.69172	5.70524	8.38097	5.00235	7.63677	14.1575	10.3633	10.8279	6.00189	11.9261	12.7469	9.20894	7.62058	8.38304	5.2812	9.3131	6.48691	6.96529	8.22445	4.29413	7.316	8.25791
Pitx3	14.6405	13.1926	9.33671	6.8799	14.7638	7.43175	4.98798	5.18489	5.63952	7.99234	7.59096	7.049	21.4907	8.13158	6.75325	6.97138	6.65417	9.48282	6.70686	6.93236	8.42825	7.56681	7.66245	5.25821	11.9877	10.7534	11.1854	10.1858	15.9806	6.01915
Stat3	12.5368	8.55956	4.63824	7.23064	12.3637	5.7081	8.75271	4.65072	6.50353	9.27351	5.71162	24.3988	3.80697	4.54947	5.63347	9.48059	8.57691	11.5554	10.7965	3.68358	9.79653	8.09153	7.56029	4.99975	4.82767	8.49503	4.88218	4.35198	16.7831	4.99499
Cited4	12.9435	14.0266	13.0834	7.74326	16.2373	6.94595	5.44385	5.28575	6.69136	7.22663	11.2417	8.25933	7.13009	14.874	7.4623	3.94715	8.63533	7.95074	5.01087	7.55769	7.86763	9.61155	13.0537	8.82583	11.5332	13.9442	8.76911	9.54054	19.6853	10.2056
Cstb	20.907	14.9261	9.38891	8.11649	13.4865	7.81478	9.38333	7.68769	9.48999	9.78398	7.56643	9.34499	8.01108	6.84056	7.30665	15.9617	7.22856	6.7224	7.54714	7.587	10.0341	9.10349	8.00432	4.63536	9.83541	11.8079	9.42766	12.9936	12.1159	12.3078
Atp5j	12.8659	8.92635	13.742	7.33407	10.2349	5.81087	7.77638	4.88232	6.46597	9.44867	6.35933	6.36852	4.97098	7.34242	4.72122	6.8107	6.74665	5.03398	7.26962	21.823	5.99574	8.75367	7.59958	6.19461	5.81807	12.6814	6.7588	14.916	19.6853	14.2232
Ppt1	20.907	14.1694	9.33671	6.72702	14.6219	12.6868	11.2752	5.07656	5.879	12.5165	6.84511	10.0878	24.8138	5.97504	8.40481	7.64298	5.82665	9.37562	11.3014	9.15032	6.70364	7.40023	8.51908	8.16061	9.87829	10.4955	6.00122	13.0871	12.1159	12.3078
LOC100360002 /// Usmg5	11.3168	13.7563	6.67826	8.26937	6.62848	5.90429	5.71737	8.67013	8.79033	5.78531	6.68319	8.73203	5.80632	9.37532	8.40049	6.86426	6.99977	7.22267	3.29176	18.6573	5.19283	7.73755	7.46205	4.55062	6.7656	13.5278	6.51123	12.2817	19.4862	14.2375
Hba1 /// Hba2	12.1301	14.1269	4.29689	8.51669	3.0471	5.72679	4.00406	9.39482	9.28808	6.78122	6.65865	7.47495	5.18095	4.2549	7.09912	15.7145	8.43088	5.32878	4.40957	5.58399	6.06226	9.24508	11.478	4.00404	25.103	5.82025	6.23394	9.75858	9.92864	9.34675
LOC100359583 /// Ptma	1.95946	11.6135	14.3083	7.2936	10.4102	7.14214	5.18172	20.9525	8.55555	6.05055	8.21904	9.75536	7.83305	15.3213	6.98239	5.65292	7.66178	6.87426	7.50474	6.86396	8.09568	10.1987	4.91576	6.66492	3.06982	5.45365	6.75385	13.5098	5.59033	10.0762
Ctsl	21.9015	14.9261	9.66199	7.90514	14.1001	5.08685	9.36813	7.5308	8.33015	11.6006	7.16406	9.99431	20.911	7.8261	7.06886	8.68127	8.02199	9.13888	6.43319	8.79369	9.08863	12.1102	8.35404	13.2409	14.393	9.30515	12.3094	9.08665	9.54549	8.19323
Pmp22	5.23507	5.15813	4.28083	17.9822	3.78592	6.99266	4.37635	14.0418	8.70581	6.89133	7.25239	9.31902	5.32702	4.364	4.52666	6.61293	6.1966	5.34665	4.02026	7.26945	7.67759	4.80577	8.3619	3.95743	8.38626	4.7612	7.93231	5.43775	4.22669	3.73008
Fxyd6	10.3925	4.27785	8.84277	17.9687	6.36552	5.59133	5.24251	5.67425	5.58787	6.88132	7.52227	9.15279	4.8386	4.78949	7.57038	7.01671	7.82242	10.6754	10.5999	10.6159	10.4237	9.62821	17.5136	7.71572	9.52672	8.99287	10.2793	11.6097	8.80635	9.18863
Tspo	4.22947	2.98832	3.32909	5.65681	4.80023	12.8129	21.1942	4.29958	5.8884	8.69298	6.80586	8.03077	5.8474	5.26589	3.68359	8.4217	5.83152	7.0172	6.70686	5.32995	4.32815	5.1889	6.5347	7.79199	4.00019	8.59459	6.07549	9.05105	9.59075	23.6633
Rpl22	6.76197	4.47476	3.95957	6.49769	3.36433	11.902	11.4157	6.6791	5.12769	9.33357	9.06794	5.30883	9.06553	3.49847	7.52715	13.403	6.28909	6.10152	6.64518	17.6655	6.7464	4.98901	5.25762	4.48283	6.29827	8.97024	10.3387	4.25853	2.16916	6.59771
Clic5	7.6086	7.16965	9.52143	7.14071	10.5688	5.39514	5.12854	2.65222	6.70075	4.40905	8.58706	9.40213	8.46755	8.58616	7.12507	5.72708	6.69311	19.8545	6.62977	5.39346	8.24771	6.82137	7.27737	4.51249	8.88789	11.6541	9.66533	8.49037	9.31319	2.96106
Fzd1	12.718	9.10781	9.11986	5.72876	7.8682	6.81516	5.01077	9.93273	9.51816	7.44183	8.5429	5.4283	9.26181	10.7136	21.3665	10.0698	8.00252	8.65648	7.25034	7.90943	8.56127	9.19094	7.40311	6.24122	10.7787	8.25968	9.00678	8.04538	7.316	19.847
Bzw2	14.548	14.9339	13.0834	8.3638	14.7638	10.4119	10.1773	9.37241	11.9458	14.0429	8.43985	9.89561	9.0564	11.6628	12.0365	6.63353	6.79046	10.2958	9.45127	9.22849	6.71314	11.4023	23.062	7.90639	12.7509	12.9666	9.61582	8.12993	9.21967	23.6633
Mtdh	10.6772	9.99967	10.4611	7.02829	6.4323	8.13709	5.88452	5.91705	5.71935	9.18843	7.27692	5.47505	10.7362	7.0624	9.54188	8.16624	10.4364	6.642	6.77624	7.80684	7.51606	8.12484	23.062	11.224	7.48589	10.5498	6.32802	6.44342	9.75969	18.3845
Arrb2	3.59357	6.39361	5.26871	5.25211	3.09301	5.68942	7.61303	24.3593	12.3168	7.27668	11.5312	5.78673	8.75513	3.48029	9.60673	10.2593	6.25988	10.4834	12.6467	6.52198	7.2595	8.85778	3.16322	10.6944	8.5063	5.50796	8.18979	4.77027	13.0843	4.19723
Parva	7.44963	8.40127	5.89919	3.93009	3.95706	5.9183	5.72877	8.52444	6.37205	6.66612	5.38777	9.54238	7.26703	7.37879	10.0866	7.63886	7.99766	8.63415	6.34839	11.6516	7.56832	9.9572	13.0222	11.6816	8.65208	12.6543	9.09591	6.60807	6.54367	19.962
Grpca /// Grpcb	6.96531	5.88398	4.16839	5.13969	12.4639	5.13356	4.76384	5.38661	4.60178	6.04054	6.70772	5.57375	8.93771	6.53508	6.10473	6.90134	5.88993	5.05185	2.58638	6.27772	6.39958	7.43354	3.15143	6.01665	8.61778	10.5271	6.33792	4.74802	9.1533	10.6224
LOC100360645 /// LOC100363494 /// LOC100910768 /// Ubb	12.9028	11.0846	10.9551	6.11997	20.6535	8.36597	6.16944	4.74784	5.59257	6.22571	8.07674	8.13466	10.0287	10.6045	6.38575	16.555	7.7348	7.3254	5.5505	2.33521	6.67038	5.38463	9.41107	9.37242	5.37646	15.2521	7.37774	11.1558	10.7643	15.0856
Atp5b	10.9656	12.2313	7.44126	17.0559	8.39413	8.87045	11.4727	8.04256	8.10476	8.72301	7.46829	8.53984	8.02477	6.64418	20.7742	5.44279	7.32591	6.31146	7.07689	11.764	10.4854	6.80055	5.56019	7.51658	8.33909	12.3013	7.94221	11.5296	8.02196	12.1569
Atp5o	13.938	9.55953	10.947	9.64535	7.69706	6.54423	9.31495	8.59542	10.091	10.0492	10.7853	9.78653	5.68307	10.6809	10.1558	5.94133	7.57416	10.662	22.5104	6.34123	8.23346	9.20343	6.68402	5.22855	9.31663	11.8079	5.62986	15.1207	19.6853	15.1144
Slc25a3	9.50521	14.8335	13.3967	7.60387	6.64101	8.62755	8.61595	9.0773	11.8378	5.74027	6.79114	8.60737	5.6146	10.7791	25.3658	8.19096	7.20909	10.0099	7.01522	9.97106	7.17399	6.73808	9.56824	4.27521	8.10757	9.60839	5.77345	13.0871	15.9806	9.46893
Atp5d	11.4203	8.92635	13.742	8.17045	6.52413	11.0332	10.9181	9.89538	9.05329	12.4564	6.42312	6.88278	8.29409	19.9071	8.55613	5.54579	9.46284	5.15011	6.17108	11.5735	7.39728	13.7427	10.975	6.13529	13.0081	9.88899	6.90735	13.1983	19.6853	14.2232
Hprt1	21.6612	13.5092	6.07589	6.17842	12.251	11.6778	5.51223	9.08477	8.31607	8.47278	7.38978	8.08791	8.36712	7.08058	6.61922	6.20503	6.32316	9.14782	8.32961	9.32131	7.9864	9.05351	9.56039	7.02084	21.1929	14.4375	10.6309	13.8703	8.94211	10.2451
Hspa5	9.94886	9.75257	9.88286	6.99682	4.06976	3.71821	5.58061	4.94582	6.87449	6.35083	5.46137	7.21003	11.2977	7.8661	20.6964	6.01962	8.05607	6.9502	5.10723	7.07403	7.59682	10.7484	7.59565	7.65216	8.8493	8.59007	20.5636	12.8512	10.0523	7.62186
Atp5e	14.2338	13.7563	7.58582	7.39252	5.60165	5.92298	6.6633	5.62195	6.34857	6.9714	8.15035	8.61256	7.44049	10.6845	12.283	5.7518	7.59363	4.91785	6.12868	24.0361	7.99591	6.25917	10.0359	5.56328	6.63269	10.328	5.95171	12.8246	19.4862	14.2232
Calcoco1 /// LOC100912282	5.11677	3.10414	6.65416	8.48521	5.6267	7.343	8.24365	5.09151	21.0555	6.09059	5.22584	6.1919	5.96152	10.7973	9.84452	8.64419	7.48655	8.77708	22.4718	4.83653	7.58732	4.37267	9.04563	4.83027	6.74845	7.30925	8.72455	5.6024	5.36104	3.71929
Slc38a2	11.4795	14.5015	15.4005	18.261	7.81393	5.9837	5.14753	4.50129	5.47518	6.76621	4.83329	7.26198	6.07107	7.51335	5.51241	3.94303	7.64231	6.98146	5.75865	4.51409	9.06013	8.37471	10.0005	6.32172	5.92955	12.6724	5.0951	10.2926	16.6503	7.76201
Tubb5	6.45141	8.30474	10.5856	6.78997	5.12998	11.7198	7.63962	12.5065	5.231	9.23848	6.65375	6.39968	11.8363	21.3727	14.1377	7.08263	8.15342	6.42313	7.39296	6.75648	8.72756	8.67871	10.5428	7.25388	5.81378	14.7407	5.7784	11.2537	4.83912	2.09502
Pdlim3	11.8307	12.1309	14.1034	7.06876	15.4776	7.92221	4.81703	5.00932	6.53171	7.42181	9.56353	8.17622	6.28561	6.82965	6.75325	8.4835	9.35575	6.67773	7.87477	6.69786	9.01262	5.06814	19.6041	7.75385	5.76234	10.758	6.18443	12.4819	19.0789	8.78616
Cdc20	18.027	8.16189	5.42533	7.93212	6.6744	6.75911	7.48007	7.94917	5.57848	8.69798	7.49773	7.68793	6.60971	9.81535	4.57855	19.0765	7.32591	7.82121	5.02243	8.30515	7.80112	8.17898	6.67616	9.09701	11.8076	7.01055	11.542	7.23105	5.98253	4.14692
Nme1	3.07228	3.7991	4.71454	8.75052	3.43529	13.7705	21.7868	5.05042	5.60196	8.94321	4.79894	5.27766	5.08053	4.50583	4.05973	4.90716	20.0745	5.98539	8.57244	4.11838	8.98411	6.93381	8.66447	6.41917	5.00346	7.00149	4.54053	6.00289	7.73535	6.04071
Scp2	8.33323	4.2431	4.5539	8.08051	5.70601	9.08999	19.9899	8.52444	5.72874	6.79123	6.65375	6.3789	8.05672	7.89883	7.57038	6.9137	9.08316	8.55821	9.52836	7.88012	6.0195	5.09729	5.28513	3.43203	7.46874	9.89804	10.3387	9.1712	7.23153	21.0868
Plk1	9.83794	8.69855	10.2603	7.68031	6.92485	7.35234	8.61974	17.6055	5.42352	5.80032	6.58505	8.4827	6.98402	4.69493	7.27206	7.85723	7.20909	5.52085	4.28622	5.71101	6.52785	4.54758	21.1248	4.69045	6.78275	9.49071	6.29831	7.68049	8.00989	3.36713
Coa3	6.65845	2.83388	8.65804	19.6999	5.73105	9.35158	8.72991	4.76278	6.88388	6.92135	8.11109	6.51396	14.2647	22.0673	9.76238	6.24623	7.28697	4.61858	6.74155	6.91281	9.4117	13.447	14.0871	13.1773	11.6619	6.63037	6.63501	8.79741	4.87834	9.97562
Timm17a	4.19989	8.94951	5.22454	6.02554	8.09777	15.793	5.6148	4.92341	5.31083	6.69114	8.08656	8.7632	8.16628	10.6263	11.7166	7.14031	6.74665	7.6068	14.7744	5.13454	5.75819	4.80577	12.8847	12.2536	12.9052	8.65343	6.78851	5.32205	11.6272	10.8668
Agrn	5.90425	5.24307	5.06793	6.29534	3.96123	8.6042	8.18287	5.16248	5.123	5.84537	6.34952	5.26727	12.2608	6.61509	7.65253	8.57826	6.77099	11.7385	22.4718	11.8129	5.19758	12.6349	8.60553	11.9655	10.7058	21.4933	4.86733	6.22538	5.09254	5.95806
Dctpp1	13.8123	12.3278	5.89116	5.05426	3.30589	4.8673	6.05168	4.60962	5.85553	6.79123	5.92262	9.30863	11.4118	11.0518	11.1934	7.3834	19.5536	7.2182	16.6708	8.17324	5.35436	4.61421	4.56997	4.6396	5.55654	7.46766	7.11531	13.3051	10.4566	3.51806
Hmgcs2	2.98725	6.86078	25.693	6.21889	10.4311	7.85682	8.96545	6.10757	6.30162	12.2462	5.75578	7.89052	5.78806	5.54955	5.24004	6.24211	5.65628	8.66095	9.33949	19.8005	7.13123	5.75527	5.99243	10.2453	8.66065	5.37219	6.07549	4.26298	4.48614	4.16489
Eif2b1	3.62684	6.96888	7.59386	5.1307	12.1967	23.9722	5.2653	12.0732	4.22143	5.34491	5.84411	9.70861	12.836	7.90247	7.69576	4.89892	7.59363	7.70954	10.7271	5.56445	5.12156	3.59808	4.35778	9.99103	9.54816	7.52649	6.34287	4.25408	4.94471	4.62846
Spon1	9.73812	6.74109	5.59801	18.3959	5.86045	3.02688	5.18552	4.34814	4.75673	6.38086	9.97081	8.91904	4.68796	7.40788	6.96942	6.89722	4.14729	3.9173	6.70686	10.1567	8.75606	8.97439	19.3055	10.5207	11.1817	6.78425	7.65997	5.3977	9.41275	10.741
Acot7	10.8251	8.37424	11.1599	5.46795	18.5873	11.3275	11.7045	21.7556	9.24581	9.12838	8.43985	10.0878	5.41375	5.11315	10.4714	6.90134	6.97057	5.06525	5.55436	7.42089	6.71314	9.27839	3.59939	12.1096	12.3479	6.6349	5.72394	4.03604	11.5367	3.15871
Slc20a1	3.77103	6.09632	15.2078	4.9958	8.50266	4.91401	14.793	12.2936	12.2886	4.89449	6.10908	7.20484	5.18095	5.70592	5.81073	5.71472	7.86623	8.71455	8.57244	5.08568	5.31635	6.77972	6.78225	7.84283	4.5104	3.77004	9.86339	10.7064	15.7302	3.58633
Alg10	5.9597	7.71017	8.89096	6.85292	23.7882	8.81907	8.4222	10.4669	7.97798	5.46001	9.2544	7.9996	6.80143	19.2416	7.72603	5.42631	6.84401	9.13888	7.16554	11.6516	12.4713	11.1274	6.26357	9.29615	8.26621	7.46313	8.82853	4.96161	8.65249	8.3729
Pi4ka	14.4926	9.99195	13.6657	7.21266	15.9868	7.1001	6.57593	8.70001	9.56043	5.9905	6.87456	10.0359	6.92467	9.73535	6.7446	7.93139	6.27935	8.58055	6.40235	6.58061	7.86288	6.52986	17.2189	6.72001	7.47303	11.3689	8.4027	15.1207	16.7559	10.1373
Ppif	6.90985	21.451	6.29274	6.60561	6.36552	6.3714	4.71446	4.72916	7.11867	6.61607	6.77151	9.61511	9.99216	17.9833	10.4239	5.29858	7.06305	9.45602	11.259	6.47313	10.5092	12.4684	6.78618	9.24107	6.86421	11.1336	9.79407	10.4483	7.7263	12.43
Aifm1	6.2185	6.60596	6.75456	9.50146	9.99699	9.51506	21.1942	8.31525	7.64928	8.26258	6.42312	9.5268	9.02901	4.33127	7.66982	5.60348	7.28697	9.01382	6.17493	11.3585	16.1248	12.0311	2.85672	10.491	11.5461	14.0528	8.56115	13.1004	6.06398	3.39588
Stk16	3.23495	3.89176	4.23666	17.8158	3.31842	12.3131	6.13145	4.20619	4.82717	8.69298	9.37707	8.384	4.64688	3.77849	4.48343	6.38631	20.2643	6.39633	5.31538	6.41939	8.28097	6.04678	6.75082	6.09292	7.94894	6.48102	5.38723	7.11981	6.33852	3.59711
Thop1	3.92261	10.1078	8.52954	7.10923	4.81692	15.7043	4.16741	4.16883	5.89309	7.00643	5.19149	6.35293	14.2647	9.42623	11.2972	5.2821	7.75427	5.48065	4.82585	11.08	9.92005	12.2268	11.2933	5.05483	4.87055	5.9515	20.1031	4.48993	5.72006	5.6023
Cdk16	8.73252	7.54415	6.06384	7.29809	6.50326	9.33289	7.52566	8.35635	10.6921	5.41997	6.93835	9.46966	7.28529	5.35317	4.26293	6.0361	9.46284	10.604	8.48764	7.24014	7.9674	23.246	5.79989	6.57171	8.00467	9.64912	7.4124	11.9702	12.846	4.37332
Il11ra1	3.11664	7.13104	5.79077	4.91936	5.18424	4.57302	8.47918	10.1867	10.5653	8.35767	5.1964	23.3027	6.21258	4.97859	6.07014	8.28161	8.47956	7.6336	8.6688	8.09508	7.10747	7.16285	13.5016	6.01665	3.3828	5.14137	6.14977	5.11291	8.48354	8.99458
Igf1	11.6347	15.2813	6.41723	5.60735	11.4705	2.59714	8.96165	5.1326	5.35309	11.0501	10.0199	7.9996	11.4392	9.1353	9.10953	7.52349	8.25564	16.1337	7.02678	5.98459	8.16694	8.29975	8.5348	8.91481	10.8944	7.58533	8.66513	7.03081	19.6853	9.84984
Dab2ip	6.65106	8.32405	8.23638	7.81521	11.4371	7.11878	15.5528	5.39782	5.23569	6.04555	6.92362	7.236	8.8875	8.88801	9.23059	6.02786	8.92739	8.20534	8.00197	5.94062	7.97215	8.08736	8.58588	5.61837	9.34665	10.3416	7.17968	13.403	16.5236	7.33078
Ctcf	7.02446	6.18126	22.3479	5.77822	7.97672	7.86149	7.48387	12.2861	6.71953	7.44183	8.92073	6.63344	5.83827	8.08067	5.8237	5.52519	5.3983	8.37954	8.56473	5.37392	5.51589	9.52826	11.1361	4.31335	10.5986	6.14158	5.33277	5.6558	7.21644	3.50728
Xab2	5.67872	21.9143	4.4013	6.0795	10.164	6.42279	8.70332	2.35337	6.66788	8.77806	7.46338	8.50867	4.50994	10.3136	8.14108	8.12092	6.04083	17.7239	6.71071	6.5513	5.72969	7.92078	9.41107	6.41917	7.22864	12.0614	8.04124	9.75858	4.59173	7.20501
Ccnb1	9.04677	7.81441	3.62626	8.47622	8.53605	6.76378	7.80298	8.64772	25.4178	9.12337	7.34562	9.89561	5.82001	8.38615	13.3854	14.5649	7.83215	11.3365	10.1952	9.63886	7.44004	8.50381	4.17702	5.93191	8.75498	10.7036	8.34328	7.40905	2.77857	4.45237
Rup2	3.20168	6.1581	3.97965	16.3859	3.79844	5.59133	4.19401	3.61598	6.4331	5.0146	5.43684	5.2361	8.09324	4.66584	4.28023	11.1575	20.8387	10.1707	10.9314	4.34799	5.74394	5.65532	4.43636	3.99133	4.10309	8.23705	7.20444	4.32528	4.23272	4.23317
Tdrd7	7.51618	23.9374	6.74652	5.17117	7.81811	5.75482	4.9234	4.85243	5.57848	5.95046	6.14834	10.0203	12.3156	8.57889	25.102	8.07148	6.07978	10.8452	8.30263	12.6629	5.52539	7.61261	12.146	9.80884	11.8848	4.51228	7.00142	4.93492	11.8685	9.08442
Ces1f /// Cesl1	12.7586	15.0343	4.6543	6.99682	13.1818	10.1597	8.20946	5.17742	8.87485	7.1866	6.13362	11.5579	9.10661	8.13158	9.43379	6.24211	5.16951	8.08028	23.235	10.5622	7.16923	9.25757	9.21459	10.7198	9.89544	7.45408	9.66533	8.55267	6.47428	20.8137
Timm22	21.0697	4.45159	4.5017	5.31506	5.73523	7.49714	8.04991	8.01268	6.05275	6.3208	6.02076	7.3347	9.48548	9.44805	8.18864	6.17206	5.98242	8.17854	17.8117	7.30853	8.26196	6.35911	9.26568	6.13953	3.31849	7.81162	9.47718	7.14651	7.46081	3.48931
Scd1	11.4536	14.1269	19.2637	5.6748	6.03576	6.39476	5.48564	8.44973	6.16544	8.25257	6.81077	8.42036	8.41277	7.2806	8.03732	7.05791	6.8294	6.82513	7.59725	11.041	22.2631	4.92238	11.6548	10.4147	11.6061	7.60796	10.2595	11.2404	10.4717	10.0619
Rbm10	10.1855	4.70255	14.2641	6.38527	8.94094	6.56759	7.7232	13.4927	4.44682	9.0433	5.24056	6.02568	20.0665	8.12067	9.76238	5.6282	6.39131	2.34949	4.79502	7.35738	6.09076	10.1987	9.83938	9.0165	9.07654	6.10085	6.55579	8.04093	8.85764	4.71829
Tpcn1	10.3407	8.92635	13.3967	7.97259	10.2349	5.85758	21.179	5.80872	6.57866	6.7562	6.94325	6.96069	9.3531	10.3281	12.8018	5.61172	8.56718	10.1841	9.75578	7.6212	7.93889	11.0108	8.39726	7.14795	9.54816	12.6814	6.81327	10.4973	10.4717	18.4563
Cep19	3.90043	5.75271	7.07984	7.25313	7.70541	4.98408	6.60632	4.91967	8.92651	6.7512	6.17778	5.99451	4.63775	4.08397	9.57647	8.45054	8.04146	11.399	23.4393	7.2841	6.13352	6.65479	5.31656	7.85978	3.67863	5.26809	5.72394	5.46445	7.66596	17.8957
Ces1d	12.3187	15.0844	9.37285	6.3448	16.1872	13.1352	13.3342	9.477	11.3307	14.8036	7.3358	10.4462	7.86957	8.33523	8.65989	6.66649	8.41628	7.513	7.8979	6.67832	6.5231	9.9572	19.1876	5.71582	7.91035	13.4192	5.46151	14.5778	8.92703	16.9938
Arfgap1	4.59178	9.10395	12.4249	6.43024	25.9755	5.53994	8.38801	12.5252	5.3437	8.56286	7.44376	6.62824	9.56308	7.20059	9.54188	8.14976	7.54496	7.3924	6.02461	5.62796	5.25934	9.07017	4.23596	4.06336	6.3197	6.67111	5.46646	13.5098	7.81681	5.1603
Timm10	14.0748	15.6134	14.9227	6.10648	15.4776	7.57188	4.94999	5.03921	6.46127	7.04146	7.23767	9.23071	6.30387	14.9612	8.31834	6.28331	5.90454	5.69059	4.79887	9.3897	5.59666	6.42575	8.73913	9.61393	9.89544	12.4144	6.11511	11.1825	19.0789	9.50486
Cabin1	4.17401	5.01528	4.78682	7.6893	6.81632	6.73575	5.34508	6.33917	7.44267	6.57103	8.34172	6.42566	4.5282	4.15671	9.66726	7.47405	7.03385	13.1455	23.4393	10.5671	6.9792	6.70476	9.90618	9.7368	12.3178	7.4405	7.86794	8.68616	16.2611	3.69055
Gzmm	5.3275	4.35893	17.6936	6.03453	4.19498	3.59676	5.02977	8.98018	28.2164	5.71024	9.43595	9.39174	5.06227	7.12059	4.79472	9.06033	7.57416	4.74364	9.61701	4.93912	6.2808	5.48458	4.35778	8.39789	5.03776	5.31788	9.393	4.81922	6.02476	4.71111
Ceacam1 /// Ceacam10	3.28301	13.2158	8.23237	8.80897	7.63027	6.69371	5.12854	4.68807	5.71466	6.68113	8.53799	8.94501	6.37234	4.94586	6.09608	7.47817	8.28485	7.14227	7.67434	6.89327	6.68463	3.37737	4.96684	19.9439	7.82031	7.91572	6.5855	7.95638	16.5236	10.105
Ybx3	8.6253	11.8799	6.9192	8.29186	6.5617	6.44614	5.07156	5.19984	6.3204	7.98233	5.32888	7.08017	7.85588	8.06248	4.14188	7.46581	10.266	7.5666	5.7625	8.47614	6.41858	5.79275	19.4351	8.54619	4.76765	10.2692	7.28861	10.0167	18.0562	9.03052
Atp5a1	9.23532	15.0149	12.8304	9.35307	5.25103	8.50143	8.68812	4.8599	8.84199	7.60698	8.76862	8.384	7.43136	11.8373	10.8951	6.62117	5.41777	6.9234	22.6299	8.73995	6.82241	10.661	7.6153	8.31738	10.7486	8.73942	9.13552	12.3573	16.6714	12.5306
Nr2f6	15.8457	9.84909	7.77055	6.87091	5.99402	9.09466	9.23897	7.65033	9.0392	8.10744	8.43985	5.23091	9.7411	21.3727	13.3854	7.45345	10.3439	6.69113	4.62156	6.1165	7.06946	7.99574	12.5704	11.6308	9.07654	2.51185	8.50668	9.82978	12.1581	11.0752
Pnrc1	5.41993	4.18519	6.66621	5.57137	7.03337	5.89028	19.6404	4.60962	6.49884	6.30078	7.29655	7.37626	7.25333	4.24035	4.35805	5.7518	6.55681	12.0735	23.235	4.85118	5.68218	6.65896	8.66447	6.60137	6.85992	4.77477	6.00122	4.12059	6.21483	5.97962
Ruvbl1	9.83055	8.27	4.37721	5.47245	23.6296	5.36244	5.08295	5.65557	6.87919	5.21479	5.2651	9.35538	12.2837	9.0262	11.8895	7.68006	7.2821	6.40973	14.3118	4.6118	6.50885	6.4424	9.63897	5.06331	3.93588	12.0704	8.19969	12.1838	5.33691	4.2691
Gpm6b	9.0098	12.8606	8.43717	17.9687	13.8664	9.24414	4.74485	4.80761	7.01067	8.42273	7.01195	9.20993	8.83729	4.34581	5.46486	7.86547	9.31681	26.4965	7.00365	10.5964	9.1789	11.0608	12.755	10.3597	6.37973	5.71163	9.35834	11.6097	9.40973	10.1769
Coro6	12.6995	13.8258	13.228	6.92037	15.4776	6.68904	5.40966	5.15501	5.43761	7.66203	10.6381	6.37371	7.38115	3.87668	6.66246	8.14976	9.35575	8.30361	5.10338	6.84442	8.89384	6.91715	17.2032	6.04207	7.01427	12.8534	9.70495	12.2995	19.0789	8.78616
Crabp2 /// LOC100911902	4.75075	13.7022	7.97937	6.72702	5.05067	8.97322	7.28253	5.31564	6.51292	6.33081	8.01786	6.62824	9.84609	19.8707	12.6115	5.16673	8.15342	4.96251	7.28889	4.45058	4.96478	9.23258	6.63686	6.22427	8.09042	6.66206	8.67503	10.564	7.24661	18.4563
Haus1 /// LOC100912125	6.35529	20.6287	5.73053	9.07428	4.45377	4.70849	4.81703	5.04294	5.00561	5.56511	7.55171	6.14515	8.98336	7.90247	10.8908	7.07439	8.13395	7.2182	3.95088	11.0605	11.3073	13.0139	23.1367	9.29615	12.6051	5.2002	9.61582	8.04538	4.50726	4.21879
IgG-2a	10.7142	13.4822	9.29655	8.16595	14.217	5.27369	5.10195	9.85055	8.84199	7.11153	24.8387	10.4358	4.26801	6.21142	8.92795	4.99369	5.15978	12.9311	10.1682	9.70237	5.75344	6.97962	5.81168	7.81741	9.59103	3.86055	7.22919	4.27188	16.7469	5.30044
Cyp4a3	14.023	6.40133	6.28873	6.65957	7.63445	7.51583	3.78372	4.99812	5.81796	5.97048	5.08845	5.24649	7.81936	14.7321	8.15405	8.61946	6.13819	6.8832	4.64084	6.37542	8.54702	9.64487	6.55828	5.3133	6.10533	2.16788	9.33358	4.37868	4.08791	4.68595
Cyp4b1	9.23532	15.0149	9.26041	4.91936	8.47344	7.54852	4.87021	10.2503	11.6923	7.96731	8.15525	9.87484	6.19432	8.32432	7.739	9.29106	6.91215	6.97253	8.53004	6.27283	7.15973	6.92132	5.43445	8.61822	23.8039	11.3418	7.7491	9.49159	10.4566	20.0518
Slc38a1	4.85058	9.81049	3.90335	7.9591	14.4174	5.02145	6.93302	21.9574	9.43834	8.97824	11.8403	23.5729	9.48548	9.44805	6.92186	8.80075	6.12358	9.66149	11.579	5.80383	8.61353	3.64389	9.749	3.89811	3.86728	12.2832	9.96737	10.9111	11.1384	8.88678
Igsf1	10.5367	10.8568	11.2563	5.99406	8.7698	6.93194	3.02014	8.31525	8.53677	6.52599	6.45256	10.3995	11.4118	8.0843	5.21842	7.2598	6.43025	7.24053	5.32694	10.23	7.90564	21.9966	6.03173	5.67768	5.31644	12.4144	7.01628	11.0846	13.3649	9.97921
Tnnt1	14.3854	15.2813	8.2404	7.10024	15.2021	7.04871	4.912	5.64063	6.02457	8.30262	10.2211	8.99696	5.87022	6.50235	11.0637	5.93721	8.53797	8.49568	5.41174	9.27245	8.89384	5.35965	22.5787	11.0503	14.2	12.7357	8.49678	14.916	19.6853	10.5829
Rab38	8.82125	11.7409	13.4208	6.96984	7.45913	10.2344	9.05662	5.37914	8.59781	7.86222	5.94225	9.79692	9.60873	4.53856	9.39056	8.65243	6.47893	9.71509	8.06365	10.3033	5.89597	6.0093	8.90809	11.8596	26.3893	14.098	7.05589	12.3351	8.68266	23.6633
Rassf5	2.74693	3.42074	6.81881	4.88338	5.4806	8.32393	7.67002	24.3593	9.43834	12.4614	11.5312	7.32951	7.08444	4.63675	6.99536	5.95369	6.02136	6.15959	6.12097	10.5329	8.50901	4.19777	5.43052	4.71163	4.99488	6.76162	11.9826	4.00044	13.0029	4.88719
Syt17	3.84127	5.32415	4.55792	8.13447	4.12819	6.51154	4.94239	7.85579	10.6639	7.39679	6.30536	24.4559	7.11639	8.32796	9.3603	7.82015	6.94623	6.03899	6.04773	6.90793	5.91973	8.09153	6.5622	8.71143	9.95975	8.07412	12.7452	6.56802	7.78664	6.51865
Cand2	13.8234	14.3972	7.85087	7.50044	13.4031	7.04871	7.48387	9.29396	11.1945	6.14564	10.2211	8.99696	6.95663	8.5898	6.27767	7.21448	9.18051	13.0339	8.05208	9.27245	8.89384	4.63503	8.77056	10.1944	23.581	15.2521	8.38785	13.2695	19.0789	10.0726
Pdgfa	9.86382	10.8452	12.7742	6.06601	7.93498	5.9183	15.3248	4.6806	6.68666	6.20069	7.4732	5.44389	5.95239	5.24043	8.0892	5.75592	6.3329	4.93571	13.2325	7.91432	7.53506	4.87657	7.34417	8.31738	6.32399	6.82499	5.50112	8.01868	10.2665	10.8848
RT1-EC2 /// Rt1.aa	6.65475	24.2926	10.8346	5.93111	10.1264	7.89419	8.39561	6.11877	8.44755	6.21571	6.66847	7.64637	6.20801	6.24779	6.00097	8.17448	6.95596	9.25949	8.81142	8.14882	5.95773	7.93328	7.57601	5.83869	16.1465	6.86119	4.86733	9.92323	11.2651	10.0439
Hsd3b7	5.29423	12.1425	10.176	8.74602	9.02025	7.54852	8.96924	4.65072	7.89346	8.41773	7.71854	9.46966	7.91065	21.3727	9.76238	19.3402	6.58115	5.27072	7.65892	8.8572	5.74869	10.1987	8.55837	7.35557	10.4014	11.4866	7.86794	5.3265	9.54549	7.73685
Kcnc2	7.63078	5.64846	4.38524	4.79345	6.41561	8.1838	21.0916	11.031	8.56494	10.2144	6.53107	5.65167	6.11672	16.2886	5.46486	9.17157	8.11448	5.76652	7.40067	5.79406	6.17628	3.07336	6.95515	8.91905	6.55551	2.45754	7.97192	7.07086	3.747	4.8261
Cacna1b	4.49196	7.29319	4.15233	7.00581	5.64757	8.72097	6.24922	9.73475	10.415	7.61199	6.30536	3.00764	4.47342	5.78229	3.42418	6.444	6.36697	5.76205	6.81093	6.05299	7.9769	5.60535	5.09651	20.0329	3.40424	8.8752	4.68412	3.48425	3.77415	15.9157
Plb1	10.0967	9.64447	25.693	7.86917	15.2731	7.59991	7.67002	10.1905	12.0163	5.82034	5.44174	5.68284	9.39419	8.39706	21.3665	5.82597	6.55194	8.66988	9.17375	9.58512	5.57766	7.10455	9.5486	5.38956	11.6447	6.11895	6.79841	6.91511	9.49722	14.4531
P2ry14	12.8659	4.67166	12.2602	7.17668	8.75728	5.23632	7.7346	9.63389	9.09086	8.57287	5.72634	7.44898	13.3153	10.9391	8.37022	9.19217	6.80506	6.11939	5.89741	11.0361	10.7895	23.754	10.7235	7.35557	6.5941	12.2017	6.20423	14.916	19.4862	9.50486
Usp15	4.20359	10.0614	6.29274	6.2054	20.2277	3.69485	5.94151	9.33131	12.4483	5.10969	4.74987	9.73458	7.88783	10.0808	4.23699	19.1713	5.55406	8.31254	10.4342	6.14092	6.029	8.49964	4.10629	11.3384	10.0198	10.1198	6.63501	5.72699	6.60099	6.79535
Hmmr	10.0413	9.58269	4.14831	6.77648	8.84076	19.4412	5.2539	4.42658	5.95883	6.28577	10.4173	7.61001	6.34039	5.93867	7.63091	6.98374	8.01226	4.29251	4.80658	8.99399	8.18119	21.4761	4.12987	5.80903	8.55775	4.92865	9.61087	7.75169	6.64323	7.36672
RT1-CE16	10.4036	14.9261	9.90695	7.38353	14.7763	8.80505	11.3436	9.36493	11.0396	13.7426	6.86474	9.31382	25.4529	9.6517	12.391	6.25035	6.79046	9.45602	9.35105	9.88313	8.25721	12.1893	7.40311	8.07163	6.79561	12.0342	8.64532	15.2898	16.3607	12.7426
Ptpn7	4.73966	8.65222	5.23659	7.22615	9.86759	5.04013	4.67267	24.3593	9.43834	4.70932	9.23968	8.04635	8.34887	7.99702	6.5241	9.03973	5.55893	11.9261	9.39731	4.28936	7.07422	6.43824	3.36755	5.11415	4.3732	6.82499	12.7501	5.15741	12.0887	4.08943
Stambp	22.7223	8.78735	4.3491	6.42574	3.58139	6.00706	4.30037	4.77399	6.02927	6.13063	7.80196	8.23855	6.47733	6.06959	6.9651	7.97671	9.4239	9.48282	4.40186	4.46035	4.47068	8.27893	17.0067	8.16061	6.85992	4.75667	5.73384	11.1514	3.72286	6.5438
Obp3	20.1269	7.15034	10.1278	7.72528	7.10433	12.6354	13.4444	5.932	8.44755	14.0679	8.70483	8.62295	9.73654	9.63352	5.70265	6.68297	4.03047	7.91054	16.5089	9.85381	6.95544	8.89526	12.1931	10.4274	12.8538	12.1293	11.3389	13.007	11.0902	11.8946
Scnn1b	5.09458	5.56352	7.47338	6.0705	10.8986	7.78208	8.30823	12.7493	6.93084	6.26575	6.77642	9.82289	9.14313	4.72039	4.54828	7.90667	5.83639	5.36452	5.77792	6.65877	4.80324	9.68651	3.66619	6.87254	4.579	5.11421	5.01587	10.9067	8.39907	11.201
Lilra3 /// Lilrb3l /// LOC100912456 /// LOC683463 /// LOC690948 /// LOC690955	14.0748	23.9374	10.8908	8.40427	10.74	9.08065	8.7679	5.27455	5.54091	5.60014	9.3967	8.72684	18.9162	7.88792	6.2647	6.81894	6.57141	8.06687	4.22069	8.91582	7.41629	8.11651	4.401	7.74538	8.61778	11.3418	9.13057	11.5296	8.48958	8.96943
Klrb1a /// RGD2301395	3.27562	6.31639	4.57398	6.83044	22.3732	11.8646	10.9295	9.88417	9.43834	13.127	22.3411	7.4334	4.58754	6.41507	9.94829	6.63765	6.97543	6.6688	10.0564	10.0688	5.04079	3.7022	8.95525	6.48697	9.35522	7.55817	10.2496	4.03159	3.73493	6.52583
Ube2g1	9.75291	11.5556	9.2082	17.4561	15.4776	6.18923	4.33836	5.47626	6.24057	6.46593	9.53409	8.08272	6.27192	5.83321	7.40609	11.2811	23.0097	12.3326	9.04655	7.87523	7.29751	5.40546	5.14367	9.58003	7.86319	12.2922	4.7881	15.2987	6.61004	10.565
Adprh	11.2761	10.6637	6.08392	7.424	6.97494	17.2738	4.03825	2.87635	6.05275	6.54601	5.6969	6.75811	11.0375	7.28424	7.63091	16.0358	5.90454	4.12724	5.79334	12.0229	9.75852	4.58089	11.5841	11.7155	13.6427	11.5183	8.30862	5.17966	2.7303	10.2595
Coq7	6.88028	6.87236	10.939	5.38251	13.0232	17.5494	4.82463	4.78519	4.66282	7.15156	7.3309	6.18671	8.92402	5.11679	9.4165	6.32039	7.34051	7.16013	15.2253	11.2706	8.73231	9.12431	5.58377	9.92324	6.10962	10.9571	7.77386	8.18778	9.32828	12.8864
Fgb	12.4555	7.9534	4.0198	5.42298	7.31304	8.61821	6.95962	5.028	6.52231	6.24073	3.80284	6.22826	15.7254	5.97504	4.7904	9.90909	3.83089	10.8139	10.9545	5.00752	5.40187	7.60845	4.38528	6.67763	4.92199	7.4224	6.2686	4.91712	4.8361	3.55759
Tnrc6b	4.21098	4.30488	4.98761	6.64158	6.06915	5.24099	7.63203	11.8603	5.22161	8.0624	5.61348	5.1478	5.20378	6.98239	4.22835	5.01841	6.97543	7.91054	4.28622	4.94401	7.28326	10.9775	13.0537	25.2233	8.64779	5.67089	6.20918	4.28078	8.87574	9.27847
Slc15a3	5.91164	4.7759	5.97951	8.6336	4.29516	6.44147	9.1136	21.9574	9.43834	11.3154	9.33782	8.52425	6.11672	5.08769	6.31658	6.68709	7.34538	13.1053	10.4419	11.168	10.6707	8.51214	3.32433	7.11405	7.90177	3.72025	7.4124	5.74034	13.389	6.35694
LOC257650	6.90246	19.1692	6.87905	5.62084	9.80498	6.86654	4.42954	6.86588	5.75222	6.04054	6.59486	2.90375	5.61917	18.7906	5.94044	6.41928	10.1297	5.39132	4.02026	4.33822	6.7559	5.13893	7.07696	6.83017	10.9802	4.35387	9.57125	8.33907	9.82003	4.95187
Gcgr	12.6662	7.6677	13.2882	16.5522	9.88012	12.3411	8.18667	8.87185	7.61641	7.67705	7.03648	8.60217	5.01662	11.31	12.1705	5.60348	7.49141	17.3934	4.20913	12.0034	12.1863	10.1196	11.5566	10.5588	5.6723	4.85171	6.97667	5.89609	3.3729	6.56896
Itgae	9.10962	25.9721	7.36094	8.11649	7.00833	11.1733	11.4613	7.91182	4.4703	11.1703	8.60178	11.7397	6.65536	4.82222	5.01522	5.96193	5.95321	9.61236	17.8117	10.0737	10.875	4.84742	9.84331	7.36828	10.2427	5.95602	10.4526	9.16675	5.33389	5.03452
Acvr1c	4.08158	6.07702	6.72243	5.5309	7.55931	5.66606	5.06016	4.67686	14.3359	5.09968	5.79504	8.2853	22.075	9.77535	7.14668	6.45636	5.81692	7.446	4.17829	9.85381	7.04096	7.77503	7.87465	4.66926	3.57573	6.21852	6.93706	5.77594	3.23412	5.10999
Xrcc6	3.9374	5.55966	3.79894	15.2887	4.34107	6.98799	7.89035	4.75905	6.13727	6.28577	6.51635	6.35813	5.79719	3.99669	5.05413	5.57051	3.58264	5.24838	4.62542	7.63097	6.2808	7.59596	3.32826	9.49529	21.866	7.90214	9.30882	10.6219	2.9445	3.40666
Lama3	10.0746	7.36269	6.96739	6.35379	7.96837	9.75796	7.26353	5.2596	5.24978	5.7753	5.49081	7.92169	9.11574	8.58253	5.90153	6.02374	6.08951	8.18301	7.19252	8.41751	7.57782	11.5897	6.55435	22.1133	8.81071	12.2424	7.65997	10.2258	14.1463	6.20601
Pzp	15.8235	5.62916	5.69037	6.19191	8.72806	5.24566	4.11043	4.64324	6.54579	6.09059	7.14934	4.87768	8.97423	4.1458	3.502	9.90909	3.83089	9.71062	11.1395	6.47313	5.62992	17.5407	8.23223	3.57609	8.63922	4.3584	5.98637	6.54577	5.39121	3.55399
Vps45	13.8234	14.8142	11.4249	5.09473	7.90576	8.09505	21.1752	4.71422	6.40023	13.5825	5.61348	6.42566	7.62308	3.56393	10.1515	5.52107	8.57205	19.7831	5.91283	9.66817	6.32831	7.86248	8.88059	8.72838	7.07001	14.0437	6.38744	4.03604	8.70679	12.2288
Lsamp	6.83591	25.9721	5.15226	5.50842	11.6374	6.66568	4.74485	9.82814	8.44755	5.62016	7.57133	9.1476	9.67263	4.35672	4.52666	8.86668	8.12422	8.45548	7.06918	10.2349	6.75115	7.87081	9.56824	19.6982	9.47098	7.47671	6.7588	9.1979	5.84073	6.3246
Sema6c	10.6106	7.86074	9.666	6.95185	9.64219	14.4057	4.96139	6.11504	5.68179	6.78623	8.51346	7.21523	7.55004	4.62947	7.3715	6.72829	9.32654	6.57946	4.95305	8.91094	9.89155	8.39137	6.20462	4.41927	3.82869	12.4732	8.35814	8.57492	19.4862	9.50486
Stx2	5.90055	7.73333	12.6136	14.5692	9.61297	4.75987	7.48387	11.737	9.74825	6.58605	6.29064	8.50867	12.4845	7.62608	8.85013	5.96193	9.33628	6.90106	5.36934	11.2461	11.8062	23.4334	7.76069	6.86407	8.19761	10.4457	9.92281	4.12059	5.68084	5.23576
Vamp1	7.55315	4.57514	6.4614	4.97781	24.1723	7.95024	4.38015	5.50615	7.56476	7.34174	8.63122	11.4696	9.67263	17.1541	8.75933	7.55233	7.01924	6.87873	7.4315	9.8245	4.55144	6.96296	5.79989	11.9231	10.1827	12.7131	7.16978	12.1304	4.64604	3.58993
Akr1c14	13.8123	12.3278	8.2404	7.32507	10.7525	9.77198	12.2439	5.62942	5.42822	11.4355	8.35644	9.98912	5.76067	7.77519	5.40433	8.25689	7.91004	5.57445	6.54882	11.7005	6.58486	9.19094	21.8439	6.01665	9.7025	7.73921	10.3982	12.8913	13.0481	23.6633
Adra2c	4.3108	6.01525	13.7099	9.25864	10.8819	7.95491	11.864	5.35299	7.41919	10.4046	9.56353	9.79692	9.92826	10.9354	8.68584	8.37637	7.84676	27.0013	12.2651	8.70575	7.81062	13.2804	11.4387	11.3384	14.4616	21.0271	8.65028	12.3796	7.05353	9.82469
Cep104	9.25011	3.82227	11.1117	5.90862	4.98389	5.74547	4.31557	7.17592	4.55482	5.67521	5.43684	7.049	4.26344	5.64046	5.36109	7.84487	7.61311	11.4258	23.4393	20.2157	3.52998	5.31384	5.63485	7.34286	4.93914	6.32262	8.91766	5.56235	7.62071	3.47134
Ptprc	7.46442	4.33962	10.2282	5.76023	6.72032	6.07712	8.47159	21.9574	9.43834	8.74303	11.8403	7.74507	10.476	5.74956	6.96077	8.81723	6.08951	8.02667	5.72395	4.2454	8.9461	10.4195	11.5644	6.82593	9.98548	5.24094	10.6705	4.71687	13.0029	4.30144
P2ry1	14.2929	14.9068	10.3527	6.95635	16.2373	8.22117	6.55693	9.23046	11.1945	8.90317	10.8344	9.31382	7.77371	10.8627	11.0248	4.88656	8.73268	6.75366	17.592	6.90304	7.54456	5.77609	8.95918	7.9996	10.6157	14.9172	7.69464	9.18455	19.0789	10.5829
Ugt1a1 /// Ugt1a2 /// Ugt1a3 /// Ugt1a5 /// Ugt1a6 /// Ugt1a7c /// Ugt1a8 /// Ugt1a9	4.74336	8.17734	9.75837	7.61736	9.11625	7.96892	7.87516	4.28463	5.82266	6.57103	7.06102	9.92678	25.325	5.37863	7.25045	7.45345	9.24379	11.4214	8.55702	9.76588	5.22608	3.84379	4.13773	7.44455	6.18251	11.8261	7.41735	10.0745	8.68266	21.9097
Stk39	5.66394	8.74488	6.94731	6.52017	5.7394	6.02574	3.96987	5.23719	6.1044	7.55193	5.99132	6.38929	9.31202	8.50616	7.85573	5.87541	6.50813	8.04007	5.72395	9.12101	7.79161	10.8942	12.2167	22.5709	12.0092	6.38598	7.69464	6.03404	9.62997	23.0381
Cd247	4.27013	4.20449	6.59392	5.2611	3.4186	5.09619	5.18552	24.3593	9.43834	5.43499	11.5312	5.94256	6.5458	4.96768	5.59024	5.76416	5.7439	4.66771	5.29996	7.14243	7.79161	4.86408	6.45611	7.02084	4.01305	8.97024	12.7501	5.02836	13.0029	7.38469
Fgl2	19.1361	14.9261	12.5775	6.60561	10.7233	6.2266	5.40206	9.19684	9.17538	6.29578	8.07184	7.84896	6.80599	7.16059	5.78047	5.68176	5.60761	4.71684	7.71674	12.3258	11.1696	23.525	10.6999	8.44026	9.33807	4.77025	5.79821	12.4107	3.66253	6.63364
Gzmb /// Gzmbl2	12.4296	15.0149	23.3237	5.92211	5.71436	7.78208	4.13702	21.3298	5.79918	8.713	5.63311	8.03077	7.93348	8.97165	9.85317	8.10856	5.47131	11.4303	8.29492	4.08418	6.00999	8.55794	5.23798	6.36833	6.51264	5.68447	6.55084	3.88919	9.76874	12.5845
Ank3	12.5479	14.3972	8.46528	5.85466	13.4865	8.05301	6.6633	9.73849	9.72477	7.67204	10.2211	12.2695	7.70068	7.7861	8.88039	14.2559	8.84951	11.1221	11.1511	6.80534	8.99836	8.0707	12.6922	11.902	8.17617	14.7407	8.34328	14.5778	8.96021	22.2331
RGD1564614	2.69887	16.6133	3.61823	4.53264	5.82288	5.44185	4.63848	4.87858	6.1044	5.6602	6.06001	6.08801	5.77437	5.08042	4.05108	9.52179	19.5633	10.47	9.96007	4.95378	4.91727	4.35601	3.72906	7.11405	3.73866	3.89223	6.25375	5.21526	5.38216	3.80913
Maoa	13.938	13.1772	11.8546	6.43923	7.54261	6.23594	5.88452	4.88605	7.60702	18.0766	7.35543	8.72165	5.42745	8.29159	6.44196	7.86959	8.70347	8.16961	6.39079	11.7005	7.39253	7.7667	6.18891	5.45312	9.7025	14.4692	10.3982	13.7457	18.373	10.0726
Lilrb3l	18.1009	11.988	14.0673	4.71251	12.4138	8.85644	7.30532	4.60215	6.16544	12.0961	6.14343	8.87748	8.52232	6.69146	9.04036	8.68127	7.64231	6.36506	6.8302	25.8437	6.55161	6.78805	5.91777	10.097	12.0392	8.50408	10.2793	10.6575	9.97088	10.1122
Gclc	4.46978	5.93803	10.4611	6.13346	3.23493	9.25815	25.164	4.36308	6.01988	13.5074	8.29755	5.15299	8.70491	5.45863	7.31097	7.79542	6.76612	7.78994	8.00583	9.09169	4.6037	5.5637	7.78034	7.77504	8.97792	10.7172	7.29356	23.0682	12.1491	9.72766
Hspa9 /// LOC100912578	8.93216	5.93803	7.89504	8.68307	4.11985	7.74938	12.1945	8.46468	4.82247	8.51281	10.2652	6.53994	12.4799	22.0673	9.76238	4.21497	8.73268	9.73296	9.52836	5.31041	7.9864	11.3773	3.8548	8.2623	11.0831	4.08232	6.60035	9.2068	5.6024	3.96365
Il1rl1	7.56793	7.58276	5.1643	16.6602	6.42813	9.16006	8.35002	4.59095	4.89291	5.46502	14.6961	9.72419	5.32702	6.00413	5.14492	6.27095	5.84126	12.9311	7.28889	9.20406	7.38778	9.53243	5.03757	3.71168	6.91566	14.6321	8.28386	8.17443	3.25223	6.09461
Trib3	9.26859	8.25455	7.62197	7.08225	6.27786	7.85682	5.13994	20.8068	6.84632	6.80124	6.86474	7.22562	5.08966	5.05496	7.42338	10.7496	9.76464	9.22375	7.57798	9.20894	8.78932	5.39713	7.22235	6.68611	7.07001	15.2929	7.69464	12.5398	7.5664	21.9097
Nexn	14.2929	16.123	14.6295	7.54091	16.2373	7.26359	4.9158	9.50688	9.9126	8.20753	10.8344	8.0048	9.6635	7.22605	5.547	7.23508	9.10749	8.02221	9.59003	7.64562	9.34994	8.17065	6.14568	7.75385	22.3162	12.7357	7.96697	10.6664	19.0789	10.5829
Ugt2b1	21.395	8.67153	7.4011	6.12896	7.23373	6.87588	4.36496	5.03921	4.59708	6.46093	5.74597	5.64128	4.87512	4.24035	6.15229	18.4049	5.47131	4.04237	5.13036	5.97971	5.65367	5.11811	3.62297	5.94038	5.29929	3.70667	4.21373	11.1469	3.57202	2.92153
Pepd	5.26835	5.98436	5.67833	8.6336	7.28382	12.3878	13.0189	8.38623	29.2917	14.8036	7.11499	5.08027	3.92109	6.72783	5.01522	6.22151	6.50327	9.71062	9.18531	6.67343	24.192	6.56317	8.52694	4.24555	5.9467	4.00085	8.01648	5.03281	7.62976	5.6562
Smad9	6.14456	5.19674	8.53757	6.27735	11.3452	6.10982	2.70483	5.55097	6.07622	6.07558	6.81567	6.85161	10.7453	9.32804	8.43507	7.68418	6.60549	6.07026	5.14578	7.90455	6.20003	4.67251	13.6195	6.6056	6.36258	11.0838	5.63481	5.17076	5.85883	20.9574
Vom1r90	5.30901	6.20057	24.0546	5.2701	6.05246	5.35777	3.8445	4.36308	5.86022	6.83627	7.3358	5.22052	4.88425	5.03678	4.63907	8.98616	8.81056	6.86086	4.53291	4.90981	5.10256	6.83803	9.51323	11.9401	12.8066	4.06874	20.6676	7.63599	2.85701	3.55399
LOC100909862 /// LOC100910467 /// LOC100910595 /// Olr1278	4.80621	5.44384	5.23659	6.03453	5.07572	6.20791	4.94619	4.35187	5.29204	7.0865	8.81278	20.8821	6.50928	6.14232	8.27078	5.10905	5.40316	4.64984	4.05495	6.5513	7.7061	6.64646	7.32452	6.85983	4.56185	6.06012	3.12935	6.93291	16.7831	4.57815
Rab31	12.5257	21.9143	9.5375	7.38353	6.04411	6.34338	8.68812	7.22448	8.90772	10.3845	7.16406	7.20484	5.39093	4.86222	8.79825	5.97841	5.78284	6.61519	4.822	10.3472	7.29751	23.1543	8.19293	3.9659	7.82889	15.2521	8.97707	15.1207	9.0115	7.9884
Cacng6	9.1281	12.3509	10.694	7.37454	8.10612	8.36597	5.70977	5.69666	5.70057	8.12746	6.91381	7.78143	9.2116	17.1541	5.35677	7.29276	9.57479	7.94181	9.65941	6.72228	6.2713	6.09259	7.06518	12.8129	8.48487	9.54502	6.78356	9.42039	8.66757	23.1207
Tomm20	20.907	10.8799	9.38891	5.63433	5.48895	6.34338	4.45613	8.19198	8.2785	8.13246	6.66847	9.97353	9.22073	9.5026	23.1738	5.05137	6.27448	5.14118	5.10723	11.4318	4.89351	10.7193	3.85873	4.4108	9.65534	7.71205	10.1803	3.45756	9.85925	7.36672
Mapre1	8.44414	6.55191	8.5215	7.73877	10.1932	8.37531	12.4642	6.5633	3.72368	8.00235	6.87946	5.78153	9.47179	4.26581	10.1342	3.07779	9.33628	5.31538	5.12265	9.73657	11.3501	11.7979	16.4527	8.97413	7.09145	6.32714	8.48688	6.17198	5.89805	16.5805
Foxc2	9.05786	25.9721	3.85516	6.65957	7.20034	7.60925	5.51223	4.7329	6.61623	6.1006	6.27592	7.76065	7.04792	6.27688	5.87991	5.61172	8.1875	4.64984	4.11662	23.6062	5.12631	13.6885	13.1755	7.38523	12.0349	6.4765	6.44686	5.21081	6.62211	8.55258
Itgb5	11.9416	11.8066	13.4529	5.30607	13.8664	5.11954	7.48007	4.90473	6.85571	6.88132	7.30636	8.74762	6.61884	9.3135	9.79697	19.0971	6.96083	12.9311	12.4077	11.2657	5.96248	8.79115	7.28523	5.93191	4.78051	8.59459	9.53164	8.86416	11.0539	9.20301
Gabarap	3.58987	3.67169	7.5537	4.66305	10.8068	6.46483	8.46019	5.8162	6.60214	8.87815	7.29655	5.37116	11.3022	10.0517	7.23315	20.0984	8.74728	8.09814	5.2036	11.9057	11.8917	12.1935	7.03767	21.6176	3.75152	9.78037	6.28346	11.3071	4.69129	11.1974
Retsat	8.93955	9.73713	4.2728	8.0985	3.7567	7.62793	10.9143	8.01641	5.85083	7.92728	7.58606	10.467	10.6723	9.75717	8.74636	19.3402	5.7293	5.27072	7.5163	5.94062	9.04587	8.34972	8.33439	8.16485	9.2952	5.53964	9.92281	8.20113	9.15631	15.7396
Vmp1	14.2929	12.4127	8.08378	8.94837	11.0322	24.7429	7.52946	5.80499	5.68648	5.92043	6.41331	8.47231	6.34039	5.20407	3.41986	5.16673	6.52761	5.33325	5.91283	10.9335	13.0415	10.7568	8.11434	7.08439	7.63595	24.9737	5.81306	6.22538	9.88942	10.7123
Tubg1	9.07265	8.61361	6.18833	7.66682	9.47523	6.24528	11.317	5.67425	6.2077	5.9905	7.57624	6.96069	4.0626	4.65493	6.44196	6.01138	6.90729	5.07418	6.58351	6.59038	9.81553	10.7235	10.9278	12.7367	23.8382	6.18684	6.48647	9.78528	5.0141	7.6003
Mpst	13.2245	9.15028	7.66614	7.71628	15.2021	6.18456	6.51135	5.2484	6.87449	5.61015	6.42803	6.96589	6.49559	7.50244	4.95901	10.0698	7.17501	10.3538	10.2684	11.7738	8.2287	23.4334	13.5331	8.2623	13.8485	14.9172	5.46151	12.9313	15.9806	3.54321
Dhrs4	8.74361	3.42074	11.8265	7.20366	7.85567	5.1756	11.5373	8.53565	6.08092	8.52783	5.57423	6.67499	8.09781	8.21159	6.45493	7.12795	9.32654	9.84462	6.78009	12.4284	9.4117	10.1613	11.7334	14.0756	11.7691	8.88425	11.0914	11.3338	18.0562	8.04949
Nr1d1	8.99501	11.046	7.01558	9.88368	14.4174	7.17951	6.07447	20.8068	5.76161	8.18752	8.34172	10.1605	9.14313	8.65162	13.3854	9.67424	8.28485	4.85531	5.68155	8.5885	11.8395	10.865	7.71747	6.78356	8.24477	13.1567	6.28346	13.1805	10.2183	18.884
Sec11c	8.97283	7.52871	19.9545	8.04904	4.83362	11.7572	7.26733	9.29022	10.833	7.48187	8.44476	10.8826	8.68209	8.73527	4.85957	5.82597	7.08252	10.997	10.7194	10.8211	6.88893	11.9603	8.13399	19.1346	8.472	11.4504	9.71485	6.32328	5.45457	11.0429
Decr2	4.92082	4.13114	3.67846	7.90065	5.49313	26.7468	13.3342	4.86738	7.07641	11.2753	16.2173	5.3348	6.04368	5.20043	6.0442	8.90376	9.31681	10.2868	10.8312	6.2484	5.21658	5.58453	5.74095	8.80888	3.94017	5.75236	4.69402	5.28646	10.2394	6.58333
Fbxo6	10.4554	11.3626	3.33712	6.15594	4.24089	5.46054	4.09903	11.7034	5.93066	5.37493	4.73515	5.64128	4.47799	10.5245	10.3201	5.76004	22.7712	5.49405	5.21901	5.96017	4.72723	4.09365	9.97298	6.47425	5.70231	8.75752	5.81802	8.01868	11.7358	11.6825
Slc38a3	10.3629	6.99205	4.45351	6.99682	11.5122	5.34843	6.08967	5.4277	3.53116	6.39087	6.60468	7.90091	6.92011	7.11331	4.88984	7.37928	9.86686	5.31092	4.94534	6.23863	7.24525	7.48768	9.51323	9.68172	22.089	11.6405	9.81388	10.564	15.8026	7.79435
Nap1l1	23.0587	10.7834	15.5612	9.34408	15.3983	8.61821	11.9362	8.44226	11.265	10.0843	6.63903	11.6098	9.37136	6.46599	6.71866	14.2559	6.99977	8.83515	7.2118	8.32958	9.68251	9.30755	8.74699	8.00384	5.95098	7.64869	9.0563	7.96528	8.73696	6.01196
Cyb5r4	9.8971	6.94186	6.43329	8.51219	8.32735	6.75443	5.6262	4.98691	7.23136	7.5169	7.51736	6.53994	14.2647	20.889	12.9834	10.762	9.06368	9.90269	7.63965	7.77753	6.9792	8.67871	9.78829	4.77095	8.90933	4.0959	9.42271	10.6575	8.96021	6.52943
Zdhhc2	12.6662	7.6677	15.5612	16.5522	12.0924	8.12774	8.32343	9.55545	8.97816	12.5665	5.40249	9.02812	7.59112	3.70576	6.93051	8.12504	7.16528	10.4834	9.52836	7.57234	22.2251	6.87967	3.97269	4.77942	9.32092	6.63943	6.85783	4.59672	6.95397	4.4955
Fntb	8.86191	3.98442	8.23237	7.2846	8.86581	6.4695	5.07535	9.00632	10.8283	4.96456	7.55171	6.70616	6.50472	7.48425	7.86438	4.30149	7.98305	5.84692	16.8134	7.69448	10.5282	23.196	11.0929	7.71572	12.8838	9.25989	9.35834	9.04215	8.87876	5.73885
Pex5l	3.90782	3.86474	4.44949	6.99232	8.16873	5.02612	12.1793	4.88232	4.41395	5.79031	8.57234	9.18396	5.14443	1.86925	4.21105	7.67182	7.68125	7.5666	6.21348	5.17362	7.72035	8.64123	6.44432	8.02079	10.8044	9.40925	5.2783	13.2206	2.86003	9.64142
Hs3st1	14.2338	9.10781	12.2602	8.103	20.8747	7.03937	8.97304	5.2484	5.92596	8.50781	23.2439	11.0592	8.63644	12.7101	10.3201	5.02665	6.2112	7.0574	7.4315	11.0263	4.98853	7.36691	7.16341	8.85973	7.59308	4.57564	7.98677	11.2448	9.31621	13.4146
Sptan1	10.1189	6.1774	7.58984	8.24689	11.3536	6.35739	4.19401	9.40229	7.67276	5.7703	7.39469	10.9917	8.61362	3.42937	8.78528	16.1512	7.25289	7.73187	8.2795	9.99061	3.45397	7.24198	4.78609	7.83436	9.5996	7.69395	4.60985	9.17565	13.2291	8.92271
Bckdk	6.31832	24.2926	11.2522	8.40877	13.4865	7.89886	7.30532	10.7695	12.8192	7.3017	9.19552	11.7657	7.54548	10.3427	22.3609	7.17739	6.78073	9.42475	7.19638	6.96655	7.57782	13.4512	9.28139	8.53347	13.484	8.07412	12.354	7.1999	8.07626	6.80613
Hnrnpf	11.6458	16.123	13.742	7.1587	8.26891	7.18885	5.81994	21.9574	9.1519	6.48095	10.2407	6.0984	10.0698	10.8336	6.4679	5.81361	20.9993	9.65702	8.60713	8.42728	8.86534	7.62094	6.35394	6.58018	5.09349	4.7974	5.93685	11.1291	7.96162	14.331
Entpd2	6.24807	9.19275	5.13218	6.29534	8.93677	7.8755	12.1641	3.94097	5.59726	7.69706	7.60078	11.2774	8.78708	3.10571	4.53099	9.63303	8.10474	25.7238	13.1169	11.1924	7.07897	3.33989	6.57399	8.71991	6.57266	8.85709	7.5758	5.22861	4.49519	3.28088
P22k15	3.54181	4.44773	12.0795	6.97883	9.68811	17.3485	5.22731	3.64213	5.78979	7.7371	3.91079	10.28	2.77078	3.92396	5.60321	9.57535	15.6108	8.62521	4.61771	5.34461	6.40433	3.95206	6.66044	5.25821	4.04307	5.31335	6.07549	5.08176	10.4988	7.86262
Spon2	6.4736	5.25851	10.6258	7.05078	8.04351	9.22078	8.4222	5.71534	6.71014	6.01052	5.9815	8.1918	21.3903	4.13489	8.65989	7.24744	5.34475	10.3047	9.64014	6.57084	5.3211	8.17065	10.6253	12.5884	14.0586	3.49848	8.62057	9.36699	9.53041	15.6893
Slc2a1	3.18319	3.07326	5.65825	19.4211	5.43469	4.90934	7.69281	8.11727	5.53622	7.63701	5.35833	5.8075	3.75676	3.77122	4.25429	4.49514	5.58814	7.20033	4.53676	5.42766	8.2002	20.5474	8.36976	5.47854	6.43975	4.69783	5.96656	6.36778	7.72932	6.58692
Camk2n1	4.75075	3.20839	8.63796	8.04454	4.25759	6.8572	4.50552	4.24354	9.05329	3.36809	8.76371	4.94521	5.21747	11.761	4.02947	8.37637	8.54284	27.0013	10.889	6.21421	8.02441	5.34299	7.12019	4.72434	7.67025	4.16831	6.96181	5.5401	6.22086	3.9385
Cst3	20.8442	9.94948	12.2441	9.43851	11.5122	9.37493	8.20566	5.67425	7.22197	6.7512	7.93935	11.2046	8.48581	3.88032	6.07446	19.1548	7.30157	12.6095	13.352	8.22698	9.79653	8.29142	7.91787	5.5082	8.16331	13.2336	11.3389	12.8157	7.21946	7.30563
Acta2 /// Actc1	9.48672	15.2813	12.7863	6.15144	15.2731	8.16511	8.72611	6.94432	8.11415	8.69798	10.2407	8.12427	10.581	7.57517	7.31097	9.56299	6.62009	6.60626	8.47608	7.80684	9.52097	7.22532	19.4548	11.0418	10.8944	12.0433	9.5564	13.6967	16.6714	11.3843
Acta2	7.29435	11.9842	9.13592	7.03279	6.81215	8.04833	5.90352	6.10383	6.59275	8.43774	8.27302	7.81779	8.25301	5.00769	9.36894	6.34099	20.1183	6.40526	7.22722	9.46298	10.0531	7.61678	16.4409	10.491	10.0326	10.3552	10.8091	8.75291	6.9057	8.25791
Pdia6	9.23532	13.8297	7.85087	7.11373	6.70362	8.59018	8.7641	6.64922	6.25466	6.57604	5.88336	10.2125	24.5673	12.0628	7.54444	9.20041	8.96633	9.94736	4.26695	7.31342	6.22379	13.4512	7.82356	10.7283	11.3232	13.2291	10.3387	11.9168	13.0481	23.0381
Apoe	3.28301	7.04996	23.388	7.48246	6.60761	12.5046	9.61126	11.2887	14.0119	14.0679	9.36235	7.53729	8.29865	3.5712	5.65509	15.4137	6.8148	8.90662	8.44139	9.09169	6.34256	10.2362	6.69581	9.66054	9.05081	4.09137	10.6061	7.02191	10.164	4.28707
Col1a1	10.9434	11.988	12.2321	9.64535	10.164	12.7241	12.1793	5.95815	9.1566	14.8036	6.84511	8.64892	6.90642	11.1391	12.283	10.9927	8.70347	13.9227	11.3862	11.6126	24.192	7.76253	11.6076	7.94452	10.7315	8.85709	11.2399	13.7946	19.6853	9.84265
Idh3g	10.2927	5.48244	13.9629	7.97259	13.474	8.72097	19.3935	11.5353	10.3211	7.9573	7.43885	8.63853	7.44962	11.1391	12.4256	6.69533	6.93649	10.202	22.0671	9.0233	10.3144	4.76829	7.26558	11.5757	11.6962	12.7357	12.2451	13.274	6.70055	7.07564
Rpl41	4.0631	10.1078	7.71031	4.66754	3.36016	11.9534	7.55985	6.57824	7.04823	7.91727	6.01585	5.48025	10.0241	5.5641	10.947	15.4508	8.17289	5.08758	5.14192	21.4029	5.70118	5.318	8.66447	6.1141	8.5063	12.2832	8.13037	5.30426	8.87574	12.1533
Hnrnpa3	7.13907	7.7372	9.17206	8.13447	8.75728	6.09114	6.07827	24.3593	9.75764	5.07466	6.482	7.41781	10.8184	10.71	7.25477	17.96	5.66602	7.88374	4.59844	7.23036	5.70593	9.72815	5.74881	5.97428	8.87074	9.05623	11.2894	9.67404	2.88718	3.36713
Urod	7.64188	6.87236	11.3526	8.86293	11.245	8.72097	25.164	4.66192	6.88858	12.4514	7.9001	10.8722	8.96967	5.33135	4.0165	7.07851	7.05332	9.81782	15.7457	10.4938	6.82716	11.0025	7.79213	10.1224	6.52121	10.233	5.40704	14.3509	12.4055	11.1184
Dlst	8.71773	6.23531	12.7863	7.44648	8.92007	7.92221	7.44588	5.26334	6.7524	5.2348	7.06102	10.5709	11.8363	19.0197	13.0525	5.60348	7.10686	7.31647	6.39079	9.52161	4.76049	13.5594	9.50144	4.5252	5.44935	10.672	7.04104	7.80509	16.6714	9.05567
Tst	18.9808	6.23531	5.19241	8.17944	5.21346	7.59991	8.59315	4.78519	4.63934	6.38086	6.82549	5.24649	4.761	9.7208	25.3658	5.03077	6.53734	5.57445	5.48112	7.23525	7.33552	7.7667	3.4147	7.76233	7.50733	7.91119	4.86238	3.90254	5.14081	4.97703
RT1-Da	8.08553	11.0189	7.02763	8.094	7.99759	4.37217	7.68901	21.9574	13.2559	8.34766	7.15425	9.18396	8.36256	10.019	10.8087	6.59645	6.30856	6.23999	8.66109	9.58512	7.93414	6.42991	6.76261	9.85121	7.63166	3.97822	8.87804	10.6085	13.0029	6.94987
RGD1560795 /// Spr	5.13525	9.77188	3.55397	6.09299	6.84554	6.79647	7.89795	7.71384	7.68685	8.00735	6.89418	7.95285	5.47766	8.86619	4.92875	7.82427	7.36485	12.3058	23.4393	7.59188	5.99574	4.12697	7.242	6.2963	7.9961	10.4185	10.0317	14.5778	12.6318	7.34516
Klc1	8.29626	7.70245	10.947	5.02728	12.0924	6.83851	4.77144	6.81731	6.68666	8.09243	9.80888	9.44369	6.0802	9.69534	10.7438	8.8502	7.45247	10.5459	12.3306	6.351	8.73706	9.07017	13.0222	10.4698	9.37237	12.7946	6.29336	12.1927	11.1746	23.0381
Tgfb1i1	6.32571	7.37041	3.75476	8.21991	9.0286	26.7468	7.65102	9.82067	14.0495	5.03963	7.85593	8.50867	10.5308	9.16439	7.55741	8.45054	7.63258	12.2075	23.4393	4.88538	5.56815	12.0144	4.36956	7.05897	6.22538	15.4015	4.54053	13.7012	3.27938	12.3078
Cox5a /// LOC100361008	11.8122	15.0149	8.11189	6.96984	4.19498	5.17093	8.09169	8.66266	8.74338	7.9573	7.4781	7.74507	7.07987	10.3281	9.50297	5.67352	7.59363	5.47172	5.07254	23.6062	8.26671	4.80577	10.0555	5.23279	9.84828	7.39977	5.38228	12.8112	16.3607	12.5306
Actr3 /// Actr3b /// LOC100910079	12.5627	11.7641	6.81479	5.91312	12.5307	6.18456	4.23579	21.9574	7.71032	7.60698	9.43595	6.5711	8.42647	5.06951	6.07446	5.7312	9.41903	8.83515	7.52016	8.56896	10.7325	10.357	8.88845	8.52076	6.3883	4.2724	4.70888	11.81	15.7302	6.77738
C4a /// C4b /// LOC100911579	14.1746	11.1657	5.22856	7.91863	10.5229	3.87236	9.02243	9.8132	8.12354	8.0624	7.88047	8.16583	7.80566	6.52054	5.84964	10.9845	5.60761	8.77708	23.4393	10.9921	6.69414	9.75314	9.26961	8.41484	8.45057	4.9196	6.5855	8.39247	10.0825	14.6472
Acaca	6.3405	10.2159	4.93139	17.9687	5.86045	8.67893	11.4613	7.94917	6.63971	9.54876	9.83341	9.92678	5.58265	9.94991	10.3979	6.10614	5.67576	6.81173	7.87863	11.4758	22.7382	9.0202	9.91011	12.9443	12.1549	8.62628	10.9032	11.5919	4.5857	7.08642
Col5a2	5.56781	9.30471	10.8346	16.215	11.0864	6.73108	6.37458	6.06274	5.52213	6.63109	9.88739	6.55032	4.31366	3.52393	5.40865	5.9949	20.7073	9.52302	8.74975	8.73018	5.31635	5.80108	6.01994	7.20303	6.12248	6.09632	8.46707	8.11658	3.05009	7.86622
Myh11	5.20919	3.84929	4.75469	6.81695	6.03576	7.05806	14.9715	8.2779	5.25448	7.32172	6.62921	10.4514	3.93935	17.5869	10.078	5.31918	8.3822	11.877	6.29057	10.1958	8.00541	9.9572	4.68392	9.68172	11.8505	8.08317	7.2391	2.83902	9.44292	7.73326
Bckdha	11.7161	4.35121	8.85481	9.94213	4.3202	6.07245	21.1752	9.00632	11.3964	8.30262	7.95898	4.97638	12.658	21.3727	9.76238	8.8708	7.96845	6.49906	6.60664	4.40661	8.2097	13.6386	4.58961	8.88939	12.1035	11.0023	5.922	7.92523	6.03985	7.86262
Snn	9.68267	11.6444	11.6137	5.9401	14.6219	5.29705	19.2073	5.2596	6.22179	6.3208	7.45357	10.5605	7.37658	5.28044	6.32955	8.60298	5.96782	10.6754	16.1967	6.59038	5.8057	6.82137	6.20069	10.8342	10.2642	9.44545	7.5758	6.60807	12.1159	6.87441
Myh4	12.6773	14.0883	21.8258	8.42676	6.77875	9.02927	4.83982	10.1382	12.4154	6.98641	10.8344	10.2748	5.95239	8.57162	6.8181	8.72659	7.84189	8.78155	8.98487	9.27734	6.32831	8.36638	22.5787	10.3258	8.99507	12.1248	8.34823	7.4224	13.0964	15.1144
Akr1b8	10.5034	7.35111	3.562	5.88164	3.74	9.25815	25.164	10.706	8.98755	13.5074	6.56542	5.01793	2.84838	4.95677	5.27462	8.28985	8.34326	4.48904	5.58905	5.69147	7.02671	4.64753	3.0139	6.08021	6.5941	4.05064	6.34287	11.8767	5.75324	7.12595
Dock9	10.7105	6.96888	7.48141	6.45722	9.51697	8.10906	15.9175	11.5054	8.45224	9.54376	7.54189	10.815	4.50537	21.3727	11.4053	6.60881	10.4364	12.5112	11.2899	11.2266	7.46855	6.04678	10.8768	11.8342	13.5483	14.9398	7.64512	12.6644	7.88318	10.3134
Hdac2	3.46417	11.2969	13.4529	5.31956	10.6022	5.36711	7.46487	4.09786	5.52213	21.1444	6.58014	5.98931	5.17639	7.12422	5.01522	7.78306	5.28147	5.72185	7.78997	10.3521	8.11468	13.3221	9.47001	5.89378	8.46772	6.82046	6.97667	4.04049	4.68224	19.0133
Nup62	10.1004	11.8568	8.30465	8.60213	6.44482	8.38465	9.60366	7.22075	5.58318	3.83852	8.08656	23.1729	7.71893	8.30614	7.49256	7.82839	5.60274	6.7626	7.01522	9.99061	8.41399	9.30755	8.00432	6.33867	6.65413	13.3875	9.57621	12.3351	5.62351	19.6134
Akap8	6.78415	6.10405	7.42118	8.11649	3.83183	5.5306	5.70977	9.58907	11.9787	6.66612	24.8387	11.5371	5.84284	6.05504	6.23876	6.93842	8.09988	7.28967	6.21348	11.7787	5.75344	8.00824	10.8925	9.71138	4.96487	7.32736	5.24859	4.36533	15.1057	6.8241
Hspa1a	6.83591	14.7949	14.0673	17.2672	15.2731	6.77779	9.30355	4.51624	5.22161	9.76396	20.5304	9.3398	8.84642	5.77866	3.00481	8.19096	8.12422	7.30753	6.25202	9.10147	10.1006	7.30444	5.26941	7.49539	7.84175	10.509	6.17948	12.8913	10.8639	8.79335
Rsad2	3.89673	5.5365	10.3166	6.87541	21.3547	11.4442	11.2182	5.15501	6.61623	12.0661	7.72345	10.8826	5.9387	7.06604	19.6761	4.63935	7.97332	12.0824	10.8389	5.76964	4.86026	7.22532	5.5877	7.23269	3.61861	7.24589	6.50132	11.009	12.1491	11.0141
Tec	4.73227	11.6135	9.66199	7.51843	7.08346	5.3204	8.27784	5.38288	7.56476	8.09743	10.1376	8.42036	9.22986	8.53889	5.81073	6.59645	6.80506	7.83014	10.623	4.19654	8.42349	18.7983	4.31062	6.68187	6.33685	6.26831	5.58529	13.403	15.7513	11.3843
Hsf1	14.0748	12.3509	9.33671	6.67755	4.42456	6.62831	19.762	6.00671	7.45206	6.2107	6.39368	5.95295	7.71893	8.77163	11.5134	8.5865	19.6364	5.34218	5.32309	7.92897	5.61566	8.34972	6.63686	12.0969	10.4142	6.48555	5.66947	5.46445	7.19532	12.5306
Atp5c1	14.2338	15.0149	14.0472	7.60836	8.92842	9.53375	7.60543	4.98691	5.45639	6.15565	7.88538	7.83338	6.29931	6.89148	8.31834	5.88365	5.50539	11.4705	22.7301	11.7493	8.24771	7.98741	6.05137	6.24969	5.61656	12.3058	7.52133	14.916	19.6853	10.5829
Tcrb	3.9337	4.05778	9.46923	8.3683	24.8819	8.17913	8.60835	24.3593	9.43834	6.95639	11.5312	9.55277	5.77893	5.70956	6.46358	7.28864	7.95871	5.56105	7.62808	8.10485	7.79161	6.51736	6.75868	7.08016	4.17169	8.97024	12.7501	5.21081	5.86788	7.38469
Litaf	4.17771	6.44766	8.3167	6.17842	4.675	12.9063	25.164	4.51624	8.02024	10.5747	5.27982	6.05684	7.5546	6.90239	8.09784	6.46872	8.3676	7.96861	8.46451	7.11312	5.86271	6.8172	4.68785	8.15637	11.7862	6.60322	4.54548	7.4847	19.7547	11.2154
Lrp4	14.3669	16.123	12.461	7.9591	16.1872	6.73108	8.92366	8.75605	8.09067	9.65386	8.16016	25.9156	7.59112	5.85866	6.32955	5.65292	6.60062	6.19532	4.68324	6.40962	10.0246	10.0905	8.50729	6.23274	6.24253	7.73921	6.95686	10.0167	18.373	15.0856
Nup153	6.4736	7.55573	7.27661	9.30361	6.95824	5.42317	9.55808	12.6074	6.40962	8.30262	7.54189	5.76595	4.67427	3.52029	7.50553	18.6316	7.69586	8.16068	7.24263	10.357	6.01475	4.54758	11.7334	4.21166	10.843	7.57175	6.19928	4.98831	10.1549	4.36972
Itga7	11.509	9.03445	9.54955	6.42124	12.4138	26.7468	6.26821	5.05415	7.17032	5.49504	10.1524	12.3734	10.1337	9.12075	8.82419	20.3991	7.75427	10.3494	12.4115	11.9936	8.54227	9.02853	8.7627	10.3215	9.65963	8.29136	11.3389	9.26465	8.63439	8.00637
Pdxp	6.89876	3.23155	7.20834	8.17045	7.90576	4.27874	4.75245	9.35373	11.0818	3.99867	6.2661	7.63599	5.01206	13.7902	7.57471	5.79713	7.22856	8.33041	4.5252	6.88839	20.643	3.26909	7.67031	10.6605	3.52	7.67585	8.46707	5.5134	6.6734	8.46634
Tjp2	6.47729	11.5865	4.9595	5.90862	7.67619	7.93156	7.95873	5.05415	5.30613	12.2062	6.36915	7.68793	8.55428	21.3254	8.09352	4.7712	7.32104	10.4968	10.4342	10.7478	5.41612	6.63397	11.9534	7.02931	10.5857	11.3327	9.12067	26.8639	9.28906	11.7221
Rasa3	3.26822	5.76429	7.57378	8.59763	4.98806	4.61973	3.64696	8.79714	27.4228	6.3208	5.01975	7.23081	9.31659	3.61484	10.5536	17.7251	4.42475	3.5153	7.13085	10.2349	6.69414	6.28832	8.1615	9.82578	4.1331	9.30063	10.0763	12.1882	3.90991	7.46734
Nfix	8.64748	9.60586	8.96726	9.43851	4.32855	8.09037	9.68724	5.15501	6.74771	14.133	10.1327	6.53994	4.11737	8.19704	6.83539	5.33154	7.58877	6.22212	6.54882	8.0218	8.87009	7.04625	11.2383	25.2233	8.17617	9.35946	6.50627	13.7012	8.5288	23.0381
Setd4	11.6347	10.7989	3.4857	5.82319	11.1657	5.21297	20.3204	5.09898	5.92596	7.83219	5.86374	5.34519	4.72905	5.84412	8.22755	5.83833	9.7695	7.65594	8.73819	7.3525	6.61337	4.08533	8.51122	4.3769	5.86095	6.98792	6.0953	12.4864	19.0789	8.78616
Gstm2	10.1966	6.78356	8.47331	8.62911	10.7442	9.07598	21.179	6.20842	6.94023	7.37177	9.06303	10.5242	8.41734	4.02215	4.75581	10.5889	5.30581	12.9088	12.3807	10.0101	11.9012	5.77193	9.39142	16.3721	8.39483	5.8655	10.1357	8.88196	9.27699	6.76301
Adam10	5.73418	8.4669	4.67036	6.74051	3.92366	6.94595	7.55985	7.06386	27.6952	6.49596	9.59297	5.1426	8.32148	21.3727	9.76238	7.31748	8.15342	7.16013	5.48883	6.66366	8.4425	11.4023	7.32452	4.2625	7.19863	6.14611	9.0761	7.11981	11.25	11.0896
Dcn	8.01898	7.67156	5.9273	6.93836	9.18304	5.64271	5.07915	17.344	5.67709	5.15473	7.17388	7.19445	3.64721	10.1608	13.3854	17.0206	7.57416	7.61574	8.17157	4.14769	4.3519	11.4231	10.2323	9.74104	5.6723	8.19632	5.13966	8.53042	3.20094	8.82928
Il6st	10.215	9.28155	12.2401	7.49145	10.1264	5.11487	7.66242	11.4643	11.171	8.03237	7.35543	5.38155	8.76882	17.5869	11.0724	6.66649	6.87808	7.0574	7.22722	10.2691	8.82733	6.73808	9.41107	6.74119	5.76662	12.2153	10.1159	8.84636	15.7302	6.96065
Col3a1	14.3669	14.1269	5.88715	17.0559	8.97433	6.06778	6.43157	10.7508	11.2415	8.67797	7.62531	7.93727	7.58656	6.1896	8.97118	4.58991	6.37184	7.6336	10.7502	25.7264	8.2287	11.8104	10.5781	8.24112	8.08613	13.2336	7.72434	13.2784	9.53041	13.3859
Parm1	6.63257	5.05775	9.28852	17.1233	10.3393	10.4586	8.75651	9.53303	11.3683	6.6461	5.67237	11.3501	9.85979	12.4992	11.5004	6.91782	7.18475	8.30361	8.10604	11.3487	12.5759	19.094	12.2206	7.27083	10.2427	13.4192	7.51143	10.8444	6.23595	7.2661
Gas7	9.86382	4.83768	6.02368	5.95359	6.06498	23.1641	4.63088	5.16248	6.21709	6.63109	6.35933	6.6698	20.1304	4.75676	10.3633	8.47938	8.02199	9.33989	8.38742	9.91732	5.66792	9.12847	5.19475	11.6181	6.47834	7.703	6.08045	3.6845	10.7613	12.1784
Ass1	4.943	7.47852	3.45759	5.66131	3.92784	5.55396	3.53679	8.81955	8.19868	5.71525	5.77051	7.12692	11.6446	4.39673	5.53403	7.22684	17.9911	8.24554	9.25084	6.34611	6.43283	6.54235	8.02397	10.241	10.5043	21.19	6.48647	7.53809	6.73675	4.63924
LOC680329	7.07252	10.3626	6.95535	17.0559	3.83601	5.90429	4.24339	21.9574	11.6077	5.15974	7.1199	7.76585	5.4594	5.61137	6.66246	6.1597	4.97967	7.0976	6.56809	7.01052	9.33568	4.84325	7.23021	5.53362	5.44935	9.08791	9.20979	13.9326	3.95517	11.316
Nfkb1	4.55111	11.4707	6.76259	6.37178	8.14369	11.6918	11.9362	21.4643	5.57378	12.3463	7.6204	8.15544	5.45027	6.71692	7.95517	6.59232	10.0178	8.12494	6.3638	7.23525	7.92464	8.69121	10.1027	7.86402	11.3232	6.52175	5.48626	24.4654	12.6288	9.95046
Myh1 /// Myh2 /// Myh8	10.862	11.9803	11.9189	8.08951	9.66724	7.92221	8.0651	10.2577	9.78582	10.5647	7.26711	10.9501	7.30811	8.57162	7.6482	7.35044	9.09289	7.1378	6.12482	7.57234	8.44725	6.1384	22.5787	9.27073	8.99507	13.1702	7.04599	12.4908	19.6853	9.84265
RT1-CE5	14.378	14.5015	12.2321	7.50944	23.5211	7.80544	4.5587	8.28911	8.42876	8.13747	7.35543	7.53729	8.59992	9.92082	22.4907	6.96314	6.45946	6.29359	5.93981	9.88313	7.86288	4.9557	4.8018	7.21151	7.23293	14.2112	7.86299	14.5778	6.22991	6.85285
G3bp1	7.29435	5.77587	7.21637	7.90065	8.39413	8.09037	7.66622	7.04518	6.17014	5.97548	6.74698	7.53209	8.6684	13.6957	8.62963	5.41807	7.29184	4.86871	7.19252	6.82976	7.44954	22.867	8.91595	6.9361	5.7752	10.8575	9.53164	10.8622	8.13358	16.5949
Scamp1	12.522	8.62134	8.21229	5.9356	12.61	5.8389	20.499	5.2484	5.90718	6.68113	9.30837	7.85416	10.5582	10.5572	11.829	7.42873	7.36972	8.65201	8.70735	9.06238	7.81537	8.2581	10.417	7.46149	10.7186	13.1567	10.205	11.4139	10.5803	11.6718
Rxrg	14.1229	13.8258	15.5692	5.50392	13.3112	6.08646	15.9175	7.37391	12.5281	5.79532	8.17488	9.06968	12.9455	8.76436	7.61362	6.51404	7.68125	7.68274	7.2118	8.21233	7.82962	11.3273	10.5899	10.3258	6.70129	7.78447	6.03093	13.0737	9.08994	23.7604
Pygm	12.8843	11.0151	13.742	7.36105	6.03576	6.50687	8.61215	9.23046	10.2695	10.3645	10.0935	8.2853	7.92891	8.5898	7.40177	8.10444	9.32654	8.35721	7.58183	7.36716	8.13844	4.56424	22.5787	10.7664	8.99507	9.78037	7.78376	12.206	19.0789	9.50486
Zfp46	7.74539	11.3162	11.4852	8.0985	12.1049	7.002	6.00229	8.39744	9.65904	6.45092	7.03158	8.12947	8.54515	4.89859	5.74588	9.04385	6.74665	10.8943	11.2976	7.3525	5.70593	5.19307	17.0028	8.70719	8.97364	23.0728	8.63542	13.8836	5.43345	10.1481
LOC102551731	2.85785	14.5053	6.36101	6.42574	8.41918	6.39476	3.05433	4.47515	4.82717	6.23572	7.3309	6.3789	6.40886	6.46962	8.86742	5.23266	6.07004	7.11547	22.5104	10.7967	10.5234	4.33936	10.0594	9.08429	4.69905	10.2194	9.10086	8.66836	6.20276	5.73885
Spn	9.39799	13.2891	14.2279	5.76023	13.4865	11.5003	11.298	24.3593	9.43834	12.026	11.5312	11.7085	7.3218	8.18977	9.05333	10.0409	7.09713	10.7826	5.57748	6.72228	9.82979	9.15346	5.21047	11.9782	13.484	5.37219	11.9826	4.83702	13.389	3.01137
Ret	3.87824	11.1077	11.6819	8.73703	8.30648	5.16625	19.2871	8.98018	12.5281	6.22571	9.64695	9.49563	6.87446	7.42607	9.18736	7.65122	5.14517	8.83068	7.17325	9.74145	7.7441	3.748	6.31072	6.99118	7.90606	14.6457	9.44747	12.74	19.4862	8.81131
Crlf3	12.9583	13.3007	14.1034	9.36656	9.61715	7.94557	7.727	21.9574	9.43834	6.4259	11.8403	9.76575	10.0332	6.44053	10.0348	5.98253	5.8948	5.40918	4.59458	7.69936	10.7752	7.84166	10.4367	7.2793	6.57266	4.05516	8.83843	4.36978	15.1901	3.29885
Cml3	8.23341	4.07322	20.5608	7.06876	6.94989	6.93661	5.16273	8.09112	8.17989	5.85037	10.329	6.5711	4.84773	4.68766	3.94732	6.74889	7.10686	5.87372	3.6695	24.3341	8.24771	4.06867	6.89228	6.70306	6.97568	4.67521	6.77366	4.06274	9.21967	9.58033
Fga	15.8235	3.74891	4.22461	5.69728	4.08645	5.9837	5.37927	8.87558	7.71032	6.67112	6.56051	5.86464	14.8079	5.40772	4.60449	9.50943	3.83089	11.8904	11.4518	7.86058	7.79636	5.62617	3.74871	4.7879	4.70762	5.88813	6.10025	4.67682	3.28843	2.7706
Lamc1	14.1229	13.3393	13.742	5.60735	20.0649	7.42708	7.34711	5.3642	6.01988	5.02461	10.3535	7.79702	6.90642	4.76039	21.4573	7.64298	6.17713	7.35667	4.72564	7.57723	8.9556	5.75111	3.48543	6.26664	6.85564	8.17369	6.25375	15.1207	10.5803	8.35853
Cacna1s	13.8234	14.5015	13.228	8.42676	9.33748	7.04871	4.76384	8.99885	9.78582	8.16249	10.1916	8.74762	7.82849	9.12075	6.59328	9.15921	8.59152	5.66825	8.66109	8.63247	8.89384	6.04678	22.5787	10.3258	8.99507	15.2521	8.49678	15.2408	19.0789	10.0726
Pdcd2	5.8303	3.76822	4.5539	15.6259	7.93916	5.7735	4.75245	5.19984	3.62507	9.09335	20.4716	6.89836	11.2977	9.0953	7.50985	6.29567	7.32591	4.47117	4.81814	5.35438	9.06488	13.9592	11.1361	5.97852	12.3736	4.6209	6.22404	6.96851	7.45779	6.44318
Pmpca	11.4462	12.0421	8.61387	7.23514	11.5164	7.75872	5.2539	10.2166	12.2745	6.57103	10.1965	7.88532	7.28529	22.0673	12.9834	7.15267	6.80506	8.72348	8.00197	11.4855	11.1696	11.4939	10.8885	11.1901	12.3993	7.74373	8.38289	11.2448	16.7469	6.47912
Muc5ac	3.63424	3.99601	8.51749	6.22339	11.5498	7.87083	6.6557	3.79528	4.08056	4.86947	5.93734	21.4846	3.82523	4.17125	4.26726	7.77894	6.94623	4.19424	7.52401	6.49267	5.34486	17.6614	4.38135	2.79223	3.98733	10.5181	4.27315	5.22416	6.76994	3.46415
Plcb1	8.57724	6.52102	4.30493	7.0193	6.52413	11.6544	25.164	5.48	6.05744	8.78807	7.58115	10.7839	9.2116	5.84412	9.80994	6.77361	7.38919	6.28466	7.40838	8.84254	4.8175	11.3773	8.40905	7.32167	11.9406	11.2377	9.13057	13.719	16.8886	7.62186
LOC290071	3.05379	3.49023	6.04376	8.79548	9.09538	12.243	7.77638	24.3593	9.43834	7.87723	11.5312	7.73468	6.44081	7.84792	6.83107	7.57705	6.62496	6.44099	5.24214	10.8211	8.09568	7.35442	7.90215	7.68182	6.73559	6.72994	12.7501	4.52108	15.7302	4.8261
Trib1	6.67324	13.3007	24.3517	6.17842	6.64101	6.06311	5.72497	7.77361	9.56043	6.60106	9.73037	9.07487	10.1519	21.3727	8.19728	7.69242	7.52062	9.75976	7.97885	5.07591	8.9461	12.0144	5.06901	5.38956	6.38402	8.86615	10.512	7.92523	4.43787	2.92153
Cux1	13.8123	11.1039	7.77055	7.19917	10.0053	11.22	7.87896	5.89838	6.01518	8.1725	7.42903	10.6956	10.6221	6.72419	7.89032	7.00435	8.29945	7.78101	6.89573	10.7234	10.5092	8.70786	7.05339	19.8549	6.73987	7.73921	8.93251	11.4718	13.0481	23.6633
Tgoln2	11.4721	5.94575	6.13211	7.23964	3.67322	7.23556	7.34711	4.57227	5.24978	5.90042	7.94426	5.40752	5.57352	6.50235	9.4165	4.89892	9.03448	5.46725	5.74708	5.89177	6.69889	6.05511	22.5787	9.46139	11.5161	13.3558	10.7745	9.78973	9.06882	23.0381
Mat1a	13.0729	3.57903	4.29288	6.04802	7.76384	7.74938	7.3699	5.79378	5.72874	6.24073	8.00314	5.01793	8.68665	3.50938	5.13627	6.46872	4.14243	6.8966	5.78177	7.86058	7.85338	5.67614	4.29097	6.59713	4.77193	11.0069	6.7687	8.30792	15.9866	5.07046
Pros1	12.6773	11.3162	7.02763	6.83943	5.86462	5.34843	9.09081	7.91929	8.3865	9.40363	7.32599	8.98137	10.2387	7.93884	7.55741	7.18151	8.89818	9.69276	8.8384	9.20406	5.87697	6.4424	11.0104	25.2233	9.1923	8.34567	7.98677	9.62064	7.11688	20.5406
Slc1a5	9.84164	10.158	4.69847	6.69554	6.86224	6.96463	5.611	5.49494	6.25466	6.31079	6.82549	9.70342	8.95141	9.74626	7.43203	9.20865	7.433	7.79441	9.87527	6.80045	7.4828	11.1357	19.6198	5.74548	8.83644	13.3558	9.98718	12.8512	8.50768	23.7604
Ndufv2	13.9306	13.7563	9.60577	8.71005	11.6583	9.13203	12.2857	9.70487	11.2133	10.1343	9.31328	9.79692	8.6684	11.1391	9.52459	6.18855	7.00464	7.513	7.13085	9.21871	6.2998	11.1274	8.11827	10.3215	21.3043	14.9172	7.78376	15.2987	19.0789	10.5829
Pde7a	4.27013	6.61754	7.91512	5.57587	5.26355	19.1983	7.89415	8.92041	6.84632	7.8472	6.18759	6.42566	7.40397	5.98595	6.37711	12.7438	7.82729	10.2243	8.14074	5.29575	6.33781	6.30914	6.58971	4.59723	3.48999	5.48986	4.72868	11.1291	4.66716	7.9309
Foxe1	10.1337	10.9881	18.9585	4.60909	14.8264	5.87159	8.01192	7.16098	5.25448	8.10744	6.15324	6.20748	5.88848	4.37127	4.98495	5.17085	5.29607	21.5027	2.99496	9.10147	6.84142	6.60065	5.87848	4.55062	5.06777	3.72478	6.5855	10.9868	7.51813	3.62586
Polr2m	14.8993	15.6134	14.0472	8.25588	14.1001	13.2286	7.59024	6.2159	7.06232	9.4787	7.12481	10.5138	9.69089	18.8452	10.7784	7.2186	6.43512	4.53818	9.008	11.5002	8.16219	9.10765	9.52502	9.92324	8.61778	11.3192	7.759	9.0822	19.7547	9.55517
Nog	14.1746	8.82596	8.10788	7.85118	10.5563	5.33442	8.97304	18.8419	6.09501	6.25074	5.45156	6.3841	7.01597	17.1541	11.7858	6.35335	7.63258	6.23552	10.2723	8.30515	9.6445	9.9572	9.45429	12.9909	10.8001	7.4224	10.0317	11.0268	10.1278	3.51087
Myh8	9.10962	10.5904	5.76266	2.84189	5.78531	8.55749	9.68344	5.66678	5.94944	6.9764	8.35644	10.28	7.58199	4.85495	7.95949	7.48641	16.8326	7.84801	3.86222	8.6569	8.45675	8.97855	7.66638	4.11844	5.44078	4.83814	7.4124	13.5499	8.69171	20.8173
Rab12	6.87288	6.66387	6.42928	8.0985	7.29634	7.0674	4.9006	5.17742	7.50371	3.83852	8.44476	6.0984	11.4027	6.96057	14.7992	9.97913	9.93501	11.8055	12.3306	7.80684	6.2523	7.8958	5.82347	5.48278	5.02489	8.12843	4.90694	7.02636	19.6853	13.0912
Aldh5a1	10.0893	11.9803	14.1034	16.0306	12.9731	7.01135	4.47133	6.11877	6.73362	6.37585	7.35543	7.05939	6.313	6.42598	10.238	8.31045	9.48718	5.37345	6.94969	8.5885	6.33306	4.46429	6.52684	8.91057	8.39054	7.88404	4.98121	12.4908	8.66757	23.1207
Pcm1	9.79728	13.0922	15.5692	8.76401	15.4776	5.60534	11.0359	14.0381	5.48457	9.48871	5.94715	7.42301	7.29442	7.46243	6.86566	4.93188	8.52824	7.36114	6.00919	8.29538	7.44004	6.6298	7.3481	7.84707	6.13534	14.4601	5.01092	15.3209	18.373	9.72766
Zbp1	8.80276	7.91866	3.67846	3.75921	8.28978	4.54967	7.93594	24.3593	9.43834	8.74303	9.6813	7.85935	8.80077	6.81511	5.85397	7.55645	8.5039	8.29914	4.33633	7.76287	7.26425	6.33829	13.0222	6.58018	6.7313	8.97024	12.7501	4.02714	4.92058	5.97243
B4galt1	7.40526	7.37041	9.72222	16.2195	4.95884	6.81049	6.02508	4.47888	5.71466	7.85721	5.8392	8.56061	4.85229	3.54575	2.61137	20.4609	5.84126	3.53317	4.25153	7.4844	7.89138	4.0645	4.86075	5.90225	4.27888	9.2961	8.18979	9.44709	5.6567	4.98421
Mcm6	14.378	13.0382	13.742	7.2891	7.95585	6.8899	8.30823	24.3593	8.41468	10.2194	6.72735	10.2229	7.89696	6.81874	5.61618	6.04846	19.1253	4.30144	8.08292	7.29876	9.33568	7.50434	6.77833	6.93186	6.4226	10.7308	12.5768	11.5252	2.62773	11.3555
Myh13	9.58654	3.1582	11.4852	7.18568	7.8348	5.59133	5.07156	3.53006	7.04823	6.36084	8.77352	7.94246	7.8011	21.3254	6.28199	5.49635	5.89967	8.14728	5.9745	7.05938	7.71085	5.19307	7.5485	6.62255	3.75581	5.15947	6.92715	11.227	10.8428	23.6633
Cyp2b1 /// Cyp2b2 /// LOC100909962	5.43472	8.92635	12.6538	8.26937	10.2349	10.4119	9.02623	11.5054	12.2088	12.5765	7.22295	9.57875	8.7323	18.7906	7.0948	6.16794	6.62009	9.37562	9.07353	9.3897	6.96969	13.4512	13.1755	10.3597	8.51059	14.9398	8.00163	12.9936	16.3607	12.1389
LOC100364956 /// LOC683761 /// RT1-CE11 /// RT1-CE13 /// RT1-CE5 /// RT1-CE7 /// RT1-EC2 /// Rt1.aa	8.04116	14.9261	12.2321	8.40877	8.69049	6.73108	5.69838	3.69442	6.16075	8.08742	10.0542	8.93982	7.76915	6.70964	6.97807	7.26392	5.10623	24.6205	8.04823	11.2999	9.4117	7.24198	9.35998	7.4276	9.04224	5.15042	8.87804	13.403	15.7513	12.5306
Fcgr2b	3.60836	8.44374	17.3562	7.99058	7.91411	9.42631	8.35762	21.9574	8.6025	6.81125	11.8403	8.74762	8.28039	7.32424	6.29064	6.25447	8.76675	9.98309	9.36262	5.58399	10.3524	9.08683	5.86276	11.2113	9.84399	4.00538	6.95686	6.64367	3.95517	8.13573
Rapgef4	11.2428	6.46311	7.3248	4.01103	11.2158	7.25424	11.089	8.41238	9.17068	7.76212	8.67048	8.51386	6.92924	8.44433	9.04468	5.07197	8.85924	7.15567	7.20794	7.79707	7.91989	6.23002	8.9749	10.313	19.1949	11.5862	7.249	14.916	6.4411	8.12136
LOC299282	15.8235	3.13117	4.5539	7.17219	5.68096	5.40915	4.78664	4.40791	6.18892	7.11153	16.7669	5.17377	7.1027	3.96396	4.56558	8.33517	4.70708	8.43761	10.889	8.16836	6.05275	6.63397	2.99818	4.182	8.15473	5.57132	5.98637	5.11736	3.00786	3.87741
Irs2	12.3187	8.10398	8.96726	6.57863	8.85328	6.11449	12.5364	8.03509	6.83693	6.03054	8.83241	9.79172	4.30909	10.0117	9.33435	5.78064	5.94835	9.60789	8.01739	9.15032	8.9556	9.9572	5.50125	8.58008	5.2264	9.30063	10.7497	6.38558	4.7637	19.962
LOC286960	7.09471	2.97287	4.16839	4.53264	7.62192	5.42317	3.89769	17.344	6.01048	6.19569	4.9805	10.0359	7.13465	6.35325	7.25045	12.4719	6.52761	8.53141	3.42281	7.04961	6.59437	5.27636	7.61923	6.71577	3.89729	6.50818	4.79801	7.53364	2.84193	5.72089
Lhx2	10.3481	15.0343	24.0546	6.60561	10.0012	6.39476	5.18932	7.29546	6.07622	5.6652	6.58014	9.76056	8.53145	6.09868	7.43203	20.3991	7.15554	13.9227	8.09834	9.14543	9.07913	9.82394	9.90225	6.56323	9.94689	6.85667	8.67503	14.164	4.41977	11.7472
Pigr	2.60645	3.90335	3.86319	6.10198	4.25759	23.6919	7.41169	4.64324	5.31552	5.01961	6.41822	5.92178	10.1519	4.02942	5.80209	5.7312	21.5834	9.76869	8.54931	5.72078	5.77245	7.27529	10.1734	3.78795	6.92852	4.67068	6.7687	4.75247	2.07865	5.71729
LOC100134871 /// LOC689064	4.13334	2.95357	6.59392	5.2611	3.61895	5.34376	4.09143	5.43891	2.8362	5.52007	6.14834	5.89581	6.15324	6.17142	7.05589	15.7145	5.49078	7.38794	7.28118	15.9459	7.2595	6.20087	7.0416	3.84727	7.4816	4.24525	6.61026	7.60039	6.87251	6.9355
Tfrc	14.8993	15.6134	14.0472	7.97259	14.1001	7.22155	9.39472	4.576	10.6451	9.49872	7.73326	8.16583	12.658	9.48078	12.0884	20.0201	6.9803	13.8781	11.2937	7.05938	7.14073	9.75314	5.56412	10.2325	12.3007	11.7491	8.066	10.8933	19.7547	9.55517
Sert1	4.83579	17.5438	6.0799	5.9446	7.42157	4.89066	5.23871	6.97421	5.78509	16.9756	6.78133	7.59962	6.86533	5.28044	4.18511	5.13789	6.74665	8.06241	8.53775	7.19617	4.43267	8.69954	6.55435	5.86412	5.78377	5.59848	9.35339	7.52919	4.98091	3.30604
Tank	7.60491	7.85302	10.184	7.54541	6.42395	4.90934	7.08498	5.83114	6.35327	8.01736	9.89229	7.4282	8.52232	15.9977	6.07446	9.19217	8.06094	9.54089	9.96007	5.37392	9.3927	7.90413	8.72341	10.4486	6.37115	7.54912	7.06084	7.79174	19.4862	8.44118
Txnip	9.69376	6.96116	6.01164	6.50668	4.65413	5.17093	8.68053	8.95403	11.3307	9.66887	5.99622	8.16583	8.33974	7.0624	7.35853	20.4898	6.41078	11.6179	12.2535	4.84141	6.2618	7.42938	6.62508	6.10139	5.7752	7.8433	21.3261	4.12059	3.55693	6.56177
Prkar2b	12.5886	13.625	9.92703	7.54091	13.8914	7.57655	7.93594	6.3429	7.6305	6.57604	9.28875	9.54758	6.29018	17.3651	9.08359	6.73241	8.04146	6.74026	5.08025	7.25479	7.44954	12.2268	9.51716	9.27496	11.0445	12.3148	10.4774	8.20558	9.87735	23.0381
Pls3	11.7161	13.5633	12.7381	6.53366	9.00355	6.67035	6.71649	9.85055	14.0495	6.18067	7.87066	7.35548	6.7923	8.12794	9.3603	8.10444	7.66665	5.78439	6.84176	12.4773	9.28342	11.9603	23.062	9.29615	15.3019	12.6679	5.32782	11.4317	10.8126	17.5903
Tfec	6.36638	3.42846	3.03995	7.76575	9.50445	5.42317	3.8673	6.84346	28.1554	5.85037	7.55171	8.6697	10.2615	11.2627	6.6149	14.1529	5.65142	4.33271	4.79116	6.54153	8.42825	9.56991	7.52885	3.8515	9.26947	11.8623	6.72909	12.3573	5.58429	9.28207
Ina	4.53632	3.4439	8.73836	7.72078	9.02442	4.98408	21.5779	5.56965	5.82735	5.25983	9.88739	5.03871	5.02575	5.89867	6.57166	5.35214	4.68761	11.7162	7.87477	8.97933	8.51851	8.46216	3.37148	7.0166	7.12575	4.40818	7.86794	5.46	11.422	4.61767
Nos3	6.3479	12.0344	9.63388	7.88716	7.43826	24.514	7.81817	5.42023	6.38614	5.48003	6.78623	11.7189	7.96086	7.06604	7.53579	6.33687	8.27025	8.34381	23.235	4.33333	8.28572	10.1946	7.65853	3.49135	4.56614	12.6588	9.38805	8.29457	9.43387	13.6338
Nutf2 /// RGD1565456	4.28123	6.36658	5.67029	7.70279	8.11864	3.65281	4.80183	7.0153	5.59726	5.83536	5.58895	5.27247	9.49461	20.889	12.2873	4.8742	6.71258	11.2382	9.91381	11.2657	6.65613	12.8598	9.52502	11.0927	5.8781	11.8985	7.20444	8.95316	16.7831	11.8622
Tnnt3	14.378	15.0149	9.38891	8.08951	7.21286	9.02927	4.61189	9.63389	12.4154	8.67797	8.07184	10.9657	6.76491	8.57162	6.8181	8.72659	9.32654	8.49568	8.13688	9.27734	8.29997	8.12068	22.5787	9.27073	8.99507	13.392	8.34823	13.6834	16.3607	13.3859
Xbp1	11.986	9.90701	15.4005	5.50392	13.5992	8.31926	7.58264	5.48	5.73344	6.29578	9.92664	8.50347	10.0743	9.14621	6.69704	7.42461	6.89268	27.0013	11.3901	8.27095	10.5092	7.22948	8.13399	9.21564	6.85992	11.5319	9.34844	23.0682	10.529	7.62186
Pf4	14.6405	15.0149	8.87891	6.87541	11.7835	7.01135	4.40295	9.85802	12.1384	6.91635	9.20042	11.1683	7.55004	4.5822	10.7741	7.41637	5.48105	10.0724	7.44692	7.48929	6.20479	7.80834	9.15172	24.664	9.74538	12.0433	10.2793	8.43252	10.3993	18.4563
Uqcrfs1	8.55506	6.26234	13.5894	16.1116	12.2009	8.40801	8.29684	4.66192	5.35778	6.06557	7.98351	9.31902	9.03814	19.9071	6.23876	5.43867	5.50539	7.88374	7.17711	9.99549	9.10289	8.88694	6.16533	6.19037	6.18679	10.4638	5.64471	5.5045	4.48916	8.96943
Hras /// LOC367858	14.4926	13.0073	14.1034	8.20642	14.9809	8.76301	7.55225	10.6275	10.7203	7.26167	8.82259	8.58139	6.97945	9.68443	13.2039	9.08505	10.0178	12.9624	9.57461	8.46148	7.65384	8.35389	23.1367	11.8892	5.51795	8.35472	6.6053	11.6186	18.0562	9.03052
Ptpn18	3.039	5.48244	5.72651	7.90964	6.40726	8.6042	11.2942	21.9574	9.43834	9.13839	11.8403	7.01783	4.83403	1.73833	5.78047	7.05791	7.47194	6.9502	4.49436	7.63097	8.9461	11.1857	6.78225	8.6394	9.59103	5.1821	10.6705	6.01624	10.2273	4.92672
IgG-2a /// Igha /// LOC100359993 /// LOC100360169 /// LOC100360344 /// LOC100364193 /// RGD1565478	7.03555	7.60207	3.85516	8.2379	4.47464	6.27331	6.34419	21.9574	8.6025	5.49004	11.8403	9.08007	7.82392	6.33507	7.75197	9.05209	5.28147	4.62751	4.92992	9.17963	9.33568	3.77716	7.22235	5.47007	5.37218	7.33641	8.7295	7.24885	9.26794	6.37131
Olr1641	11.3242	6.75267	4.64225	8.80897	9.65471	14.2983	4.31937	4.26596	2.62489	6.55101	7.78233	4.5764	6.48646	7.01876	5.35245	5.93721	6.86348	2.06809	4.28622	8.12439	6.39482	6.63397	3.67798	4.05065	6.57695	4.10042	5.00597	4.50328	4.16635	3.3815
Cdx1	12.2669	12.459	5.68636	6.2054	25.9755	9.99619	8.39941	10.691	10.9222	6.53099	6.16796	9.32421	10.1428	8.63344	25.8111	7.24744	9.11723	4.45777	5.31923	7.56257	5.55865	10.1821	7.24593	8.15637	11.6876	6.128	6.30821	8.97541	10.0946	8.38728
Cdc34	13.0248	12.3741	4.1724	7.08675	10.7567	12.271	8.29684	5.73775	6.63971	7.63701	6.14343	8.12427	10.1428	6.96785	21.319	6.65825	6.28422	7.75421	6.02846	5.29087	6.65613	10.2487	7.22628	6.2963	13.1711	6.18231	8.95232	4.44988	11.0298	16.7458
Hoxc4	12.2928	14.9339	7.16818	8.71454	8.38161	8.21649	7.45348	10.8106	14.0495	6.24573	9.59297	9.50083	9.11117	7.92429	7.04724	6.80246	6.93163	6.8162	22.7301	7.01052	10.2194	9.82394	9.77258	6.71577	9.74109	14.2112	9.61582	13.6878	13.2171	22.2331
Creb1	3.30889	8.0422	3.38129	5.78272	7.37565	8.55281	7.54465	11.4606	7.72911	5.21979	6.21213	5.78153	5.31333	4.81494	6.50249	8.31869	5.47131	12.5872	12.6467	6.50244	5.57766	4.45596	4.45601	17.6983	7.56307	22.3758	11.948	9.98108	10.8005	11.9413
Myl4	9.71224	9.87612	10.3447	8.62011	7.46748	8.41735	22.2655	10.2577	8.45224	14.8036	6.38387	8.61256	7.19856	6.67691	6.58463	5.20382	6.37184	8.72348	6.10941	10.572	20.9091	10.8609	8.74306	9.30039	9.62533	4.78383	8.53144	10.3371	11.9289	14.216
LOC100359951 /// LOC100362149 /// LOC100362684 /// RGD1562259 /// Rps20	7.11319	6.7102	3.78689	4.33929	3.26833	6.71239	5.06776	17.9155	6.23118	5.68021	7.60568	7.22562	7.23051	5.38226	7.07751	5.78889	6.62496	5.01165	6.2289	23.7039	5.65367	8.68288	9.29711	5.50396	3.83298	10.3099	11.6855	7.61819	11.0751	12.3581
Sdhd	9.10962	8.94951	9.36883	7.26212	9.83003	5.41382	8.29684	4.44153	5.23569	7.28669	7.3358	7.59443	5.64199	6.19687	8.27078	5.51695	6.81967	10.2913	22.1442	9.93687	6.33781	7.91662	3.38327	4.96586	8.472	6.63943	4.78315	5.18856	13.8597	6.75582
H19	12.718	8.92635	23.3237	6.4842	9.69228	6.87588	6.53794	9.8132	12.2792	6.80124	7.41922	8.11908	7.49526	6.50235	8.34428	8.62359	7.86623	8.45548	8.86153	10.4303	6.35682	7.3794	22.5787	10.3258	12.8109	14.6683	9.14047	15.2898	13.4765	15.1144
Rpl3	14.0748	16.2775	11.9189	7.65333	25.1574	6.72641	4.68407	18.9801	5.38596	6.95639	4.93143	7.1477	9.47635	8.16431	12.0884	6.19679	8.23131	6.05686	6.11326	5.39346	7.17874	10.9733	8.14578	7.39794	11.6876	4.48512	9.48213	6.12303	8.42622	10.3889
Myl6 /// Myl6b /// Myl6l	16.2783	8.27772	3.45358	4.40674	9.82168	11.874	11.184	9.6451	9.87504	12.2362	11.9581	7.69313	8.02477	6.41507	9.84452	17.2472	7.93437	9.56322	10.7194	4.41638	8.99836	4.26856	8.1222	7.80046	5.10636	7.7211	5.57044	5.13071	4.91454	4.46675
LOC100360117 /// LOC100910370 /// Rpl8	5.29423	8.31247	7.0718	7.10923	3.71496	9.00591	8.426	4.34814	4.86474	3.85854	22.7582	7.30353	5.41832	18.427	9.02739	4.4457	6.83914	5.37345	4.12048	7.85569	7.33077	5.75943	9.32069	3.37695	6.17393	10.3416	7.39754	8.85526	8.64344	8.35853
Gngt1	4.96149	5.46314	3.82303	5.73775	6.3029	5.17093	4.38015	4.449	5.60196	6.541	6.1974	8.90865	6.44538	18.2415	4.18511	6.36983	7.06792	4.27464	4.15517	6.62458	14.8183	6.50487	6.0553	5.20737	5.23498	5.55322	5.71899	5.09956	2.676	4.68236
LOC100360522 /// RGD1564744 /// RGD1565054 /// Rplp1	7.59381	8.68311	15.2078	8.51219	3.4186	7.07674	7.12297	5.40529	6.56927	7.05648	10.2701	5.02313	11.357	5.5641	9.82291	3.86475	5.33502	5.09205	3.78128	20.2499	7.4923	8.05821	4.05914	4.15657	7.21578	7.4405	6.71919	11.4985	9.58773	12.1353
Sdhc	5.61587	14.3818	6.48148	8.27387	8.98686	5.99771	12.0616	4.93835	5.91657	7.66704	6.89909	7.94246	4.22693	9.06984	10.9211	4.78356	7.7348	11.1891	22.5104	5.53514	7.13123	5.81774	5.70558	8.04621	8.51488	8.48597	6.83307	10.9912	11.0298	8.20401
Rpl23a	12.7476	13.0382	9.93105	7.28011	3.23493	7.17016	7.708	4.57974	6.76649	8.00735	5.38777	5.80231	13.1464	14.1175	8.82851	9.06445	6.96083	11.676	8.04437	3.69335	7.11697	10.7068	8.14971	5.98275	10.6157	12.9666	10.3585	8.12993	18.373	10.0726
Nedd4	10.0746	6.87622	10.6338	5.89963	9.83003	5.89962	8.04991	24.3593	8.08128	8.52282	8.03749	10.628	14.2647	20.5471	11.0724	8.26101	7.80295	8.51801	9.98319	9.20894	5.73444	11.5647	6.70367	10.6181	11.0445	9.46356	11.8489	5.638	10.4657	9.60189
Myl7	4.05201	14.7331	13.1758	15.581	12.2719	16.3209	5.01457	9.70487	12.237	5.89041	10.2407	7.98921	8.60449	4.74221	3.54524	5.72708	3.36359	5.10098	4.84127	7.11312	8.7038	6.67561	6.84513	9.28767	4.35605	11.2377	5.70908	7.83179	3.89483	12.3078
Fau /// LOC100360647 /// LOC687780	5.02804	5.51333	8.05166	8.17045	3.59391	11.0005	6.94442	14.124	6.52231	8.00735	7.85593	7.42301	14.2647	22.0673	9.76238	3.05719	5.2766	4.32377	4.59844	7.41112	5.21183	14.13	10.028	4.47435	8.73354	4.10495	9.88815	5.09511	9.75064	8.5418
Ldb1	11.1134	13.1231	6.68629	6.75849	9.23313	24.514	7.88655	17.5756	5.09013	6.46093	7.69891	5.22571	4.31822	11.03	9.23059	10.2923	8.96146	10.2556	10.7657	8.82788	5.14056	11.0191	10.2166	3.48712	13.5398	4.23167	4.91189	6.82611	12.1159	5.19983
Itm2b	2.88373	7.77967	7.52559	8.74602	20.7662	7.65596	4.213	8.13969	5.45639	6.49596	6.15324	7.46456	4.72905	7.24423	4.14188	20.3991	5.71956	8.77708	12.4848	9.85381	8.77507	6.60482	4.05128	6.57171	10.8944	10.5769	7.34308	5.6024	7.39142	6.83128
LOC681754 /// LOC688869	6.7176	14.3818	6.02368	3.92559	5.91889	5.81087	5.76676	5.61074	5.49865	5.75028	6.5507	7.32951	4.76556	8.17158	6.97374	6.00314	4.52211	8.94235	6.94198	21.3003	9.81078	9.54908	11.2658	7.16914	8.18903	11.1789	7.81347	10.8577	10.2605	8.90475
Ndufa4	10.7215	11.8915	6.12809	8.30085	5.37625	5.64271	8.92746	8.71869	8.55555	9.92911	9.45067	6.64902	5.73328	8.49888	19.0405	7.89843	5.84126	5.64145	7.48932	5.80383	8.86059	10.4944	3.86659	4.35572	7.77744	7.32736	5.81306	4.80142	13.0029	10.1122
Ctsa	9.93037	25.366	14.9227	5.19815	13.5951	7.6653	7.3661	11.8154	11.3119	6.85629	8.46439	11.8747	11.2931	7.59335	10.8908	19.0971	6.02623	8.93342	6.09013	12.0767	7.43529	11.3273	11.2147	11.8469	9.56102	6.8974	10.5269	6.66147	9.2438	10.4751
Eif5a	10.4332	3.09256	10.5294	9.11025	5.90219	7.38504	5.70977	7.42994	6.19362	6.13063	9.59297	7.11134	10.7088	9.6517	25.3658	6.0155	7.21882	8.94235	9.13905	10.4498	8.89384	13.2888	6.55435	6.33867	8.87074	12.3284	8.52649	9.90988	13.9954	6.66239
Itm2c	23.0587	16.123	8.87891	6.98333	13.4865	6.63766	8.38041	6.67163	6.66318	9.73894	7.23767	10.2125	8.39908	5.17497	6.94348	18.7552	5.36909	5.58785	7.54714	9.73657	7.62533	9.50327	7.82356	8.73262	8.48915	8.25063	8.97707	11.5563	12.2879	13.6338
Tnni1	14.3669	14.0883	9.16001	7.63085	14.9809	7.26359	8.38801	8.63277	9.38199	9.79899	9.0385	9.16318	7.82392	17.4305	7.40177	8.54118	8.31892	8.87088	12.1379	7.46975	9.34994	5.03482	11.3169	12.7451	8.99507	15.2929	7.14502	12.2995	19.6853	10.5829
LOC100911575	7.29805	6.78356	6.43329	5.59835	4.97554	7.95024	11.1916	8.84943	5.46578	28.0357	7.62531	10.0307	10.2889	10.1754	6.35981	15.7145	6.6639	7.77207	6.72613	4.2454	10.1481	8.94107	10.5349	6.69882	11.3918	9.11959	11.1755	7.02191	6.00968	5.98681
Snrpd2	6.56602	7.65612	3.55799	5.59386	5.54322	6.53022	5.2805	7.40379	28.2164	5.49004	8.94526	8.48789	10.1382	8.56798	23.1738	5.64056	5.7439	7.5934	3.81597	11.0263	5.45413	8.73285	5.83132	4.4108	6.5941	9.28252	8.27396	4.85927	5.46965	4.72548
Cyc1	14.0748	10.1425	13.742	7.60387	10.2349	11.9674	12.1793	9.38735	9.20825	14.8536	7.61059	9.58394	8.55428	8.38978	9.13115	7.91079	6.182	8.02667	16.2699	11.4074	8.76081	11.0316	9.45429	9.33005	5.99815	7.88404	8.7394	11.5252	16.6714	9.40784
Srpr	7.28696	9.99581	9.39695	7.8242	11.5623	5.15224	5.65279	4.59095	8.87485	6.25074	7.23276	5.97373	4.57385	4.53856	9.27815	4.91128	5.62708	8.19641	7.14242	10.9433	11.5877	23.4334	7.76069	8.20298	10.903	10.2601	6.01112	5.07731	19.6853	10.2056
Mbd3	12.6773	11.5633	10.694	6.42124	7.7388	3.93775	5.12474	4.74037	7.10458	5.51006	5.83429	7.78663	7.50439	7.17514	10.5968	11.9568	9.9058	9.10315	8.37972	7.33296	8.47576	20.2476	11.3483	6.83441	9.90401	12.8761	6.39239	10.6664	7.79267	13.6985
Ndufb6	7.80824	19.37	3.88327	8.72803	6.55335	12.5186	7.51046	4.94582	5.59726	8.99325	4.20521	6.94511	7.40853	7.16059	10.5103	6.55936	5.37396	9.38902	21.3193	8.0218	8.56602	9.19094	3.20251	3.78371	5.97671	7.39072	5.34267	7.91633	6.7096	8.44837
Psmb5	13.938	14.0883	6.81881	5.86815	5.32616	8.45005	8.50958	4.49382	6.80875	12.8918	10.2112	9.12682	6.92467	21.3727	8.19728	7.99731	7.40379	6.53479	7.56256	8.41751	10.0246	12.2601	10.5192	4.4913	8.45486	12.0614	6.86773	8.84636	19.6853	10.5829
Rpo1-3	6.89506	7.71017	6.29676	6.52467	7.85567	6.42746	5.90732	4.81508	5.87431	5.76029	7.16897	5.93737	3.25464	5.28771	9.69753	14.2765	9.32654	4.35951	4.49436	13.4641	8.16694	9.94471	6.81762	11.4274	5.33788	4.14116	6.02103	9.61619	7.48796	6.72707
Tnnc1	14.0748	16.123	14.1034	8.14347	13.3112	7.04871	8.27784	8.58795	9.59799	8.96823	10.6381	8.37881	7.79197	6.50235	6.13499	9.15921	9.47257	6.06132	7.84779	7.46975	8.78457	4.87657	22.5787	9.27073	11.5804	11.12	7.96697	7.95638	19.0789	10.5829
Ndufa8	11.5201	9.55953	8.72229	6.15594	11.6583	6.59095	7.19135	5.25587	6.01988	7.89224	8.8275	8.73723	7.02966	7.99339	8.46102	6.38219	5.25713	6.36953	22.1442	6.54153	7.4638	5.02649	4.9079	5.70734	6.65413	12.3013	4.86238	11.8011	16.6714	10.6224
Tenc1	13.2836	9.32788	8.29662	5.39151	11.4705	10.0756	21.7868	9.56292	13.2982	9.54376	7.25239	10.2488	11.357	11.2627	9.04901	11.8538	7.2675	10.3494	23.4393	11.5735	7.14548	10.0696	4.69178	9.33005	12.7809	9.56765	10.2149	7.54254	4.44089	10.1948
RGD1560015 /// Tecr	14.6405	10.1425	14.2279	8.40427	11.6833	8.28656	7.86376	8.74857	12.0961	8.84812	8.52818	13.2617	7.65503	13.1647	25.8111	5.75592	8.53797	13.3555	11.2745	10.7918	6.95069	11.1274	14.2718	10.3215	8.15473	9.16033	7.69464	9.54054	16.6714	9.36472
Mlf2	8.55875	7.23528	6.12809	7.93662	10.1139	19.6841	7.62823	9.65257	12.4389	8.07241	10.5155	11.7657	10.1839	9.48442	11.0205	5.57875	8.08041	10.5102	10.2492	3.79594	8.73231	7.25864	9.30497	10.1266	14.2129	9.70343	9.86834	6.33663	19.4862	11.8946
Ndrg1	7.68994	8.21981	6.23652	7.07776	8.76145	5.76883	19.9253	8.40864	8.25972	6.46093	9.29856	11.1059	8.73687	9.60079	23.8915	9.52179	7.98792	14.3024	10.7502	9.51672	10.2289	8.6329	9.39142	8.59279	10.7401	9.77584	8.58591	12.3306	6.80011	9.96843
Col6a2	9.06895	13.1926	5.12013	4.89238	11.9505	9.67855	8.90086	5.24093	7.82302	5.14472	7.08555	5.61531	7.06618	2.93479	5.60321	6.54288	5.8656	7.77207	11.1781	10.2544	16.8612	8.68704	7.96502	9.33852	9.5996	6.36335	8.3928	10.4439	9.29207	8.13573
Ptges3	14.548	14.3972	7.66614	7.61286	13.1317	8.17913	3.8597	5.57712	5.015	7.34174	6.74207	5.72439	3.93479	18.3433	9.14412	8.24453	5.47131	8.40188	5.33079	7.19617	7.0172	11.4939	8.85308	8.21146	9.46241	12.6679	5.97151	8.55712	15.3199	4.65002
Rnf181	8.29626	7.05768	12.0915	8.89441	14.6219	6.55358	6.07067	4.80761	7.11867	5.78031	10.594	7.41781	6.88816	3.61848	7.49256	7.67594	8.82517	5.30198	5.32309	5.21759	9.04587	7.04208	6.31072	7.27083	21.5144	4.58016	5.83287	12.0992	13.2653	23.0381
Maf1	7.33132	10.3163	5.10407	14.9874	6.87893	6.11449	5.01077	4.97197	6.52231	6.14064	8.94526	9.8177	5.09879	6.626	9.13548	3.92655	6.35724	10.997	9.61316	8.45171	4.3519	6.25917	8.61731	7.92757	9.05081	13.3875	5.69423	12.7623	18.0562	10.8776
Dstn /// Dstnl1	13.3982	10.7989	13.5894	7.17219	16.2373	8.54814	11.1004	8.17331	6.6491	8.88315	7.78233	9.88003	10.2752	8.00793	25.2706	8.47526	8.15829	7.111	7.39681	7.41112	6.44709	8.52046	14.0871	13.44	13.4369	14.9172	8.79387	11.9168	19.0789	9.50486
H1fx	10.8177	4.71413	5.17635	7.00581	10.1932	6.98332	5.10575	3.98579	6.60214	5.68021	6.63412	6.70097	10.266	4.36036	6.71434	6.27919	7.06305	5.48958	15.2253	7.03006	6.87467	10.3153	6.55435	9.24954	5.62514	9.59933	9.34844	7.41795	12.846	6.8205
Eif1	9.39429	4.02689	7.56976	7.06876	2.99701	10.3605	8.03471	8.05377	29.4185	13.6075	5.79504	4.82054	7.13009	8.84073	8.18864	4.29737	22.1481	4.68111	3.57314	11.9936	4.65121	8.02906	11.3719	10.1902	10.6157	11.731	6.88259	11.2537	8.45036	7.39187
Mpc2	8.44045	7.51326	14.2279	17.9687	13.8372	13.0558	12.487	7.65033	8.15172	14.8036	6.93344	6.72694	8.41277	7.36424	10.2207	6.88898	6.76612	9.90269	9.54763	8.14393	8.54702	23.7082	9.70185	8.04197	6.2511	8.45429	8.72455	12.8512	8.89082	11.4993
Pdha1	7.02446	7.51326	11.2643	17.9687	13.2152	8.79104	10.9599	7.14977	5.71466	9.17342	7.3309	8.49828	7.04792	7.04785	8.03732	6.43576	5.93374	7.13333	22.5104	10.7527	8.57553	8.13317	9.32069	7.44455	10.1055	9.44545	6.67463	9.39369	7.46081	5.90775
Uqcr10	10.9914	7.76036	9.4612	7.70729	9.58793	16.7646	5.24251	4.97944	6.88388	6.61607	8.40551	10.3475	8.746	19.9071	6.23876	5.97017	5.75851	13.1187	10.4419	9.63886	9.56373	8.50797	11.1165	11.1011	8.00467	6.73447	8.58591	11.138	3.38497	10.5865
Drap1	7.59751	8.08854	4.51375	6.83943	5.90219	8.15577	8.72232	5.15501	5.83205	12.3864	8.95508	8.77359	9.11117	8.16431	9.87911	6.4852	8.99554	7.24053	4.33247	10.8211	8.99836	8.12484	16.0558	6.11834	3.54572	12.9666	5.69423	6.48347	16.2611	10.547
Cox7b	6.35159	10.3973	12.9911	7.43749	6.97494	6.4041	4.41054	4.81508	6.36266	5.2298	6.1238	7.84377	7.04792	14.9612	10.4757	6.41516	6.71258	5.26178	8.01739	5.0124	6.60387	5.16808	5.45803	10.4444	9.80969	9.23727	4.99607	15.5301	19.4862	8.90834
Pdhb	9.03198	6.54805	9.37285	17.8158	10.5605	12.3878	9.63406	8.03509	6.83693	13.6125	8.07674	11.4851	8.4995	8.80436	11.7468	7.71302	7.764	7.78994	23.235	7.32807	9.95806	13.2554	6.29107	12.0969	12.8366	7.63059	9.76436	12.8512	11.1324	11.1866
LOC306766	14.0748	16.123	15.4005	7.25762	13.3112	5.88094	4.54351	2.76428	6.43779	6.21571	6.1974	7.57885	6.52298	3.99669	6.64516	6.98786	7.53522	5.43598	4.97232	8.28561	7.05046	18.7775	5.94528	7.14371	6.56409	7.87498	6.63006	4.57448	19.0789	10.5829
Tubb4b	14.8993	10.1425	15.5612	7.04628	13.9791	10.1784	5.35268	8.30405	11.3589	8.85813	7.09537	10.9137	4.95728	8.68072	9.67158	6.45636	7.07766	8.79495	6.37922	11.9838	10.1861	11.9603	23.062	13.0544	10.1398	7.71205	7.9026	6.03404	16.3607	9.42221
Gpi	14.4926	15.0149	13.742	7.33407	11.7668	13.8639	10.9295	10.0373	13.2982	9.0383	8.69011	7.8126	7.44505	12.2774	13.2039	7.13207	7.96845	9.54536	10.1644	9.20406	6.92218	14.384	9.12422	9.29615	25.6261	12.0433	9.5564	14.916	19.6853	9.84265
Cbx3 /// LOC100360453	14.4926	16.2775	12.971	7.76125	12.539	7.81011	3.93568	10.9824	13.1808	6.79123	8.95999	10.9657	10.1748	21.3727	14.1377	20.7329	5.82665	10.4968	12.9859	4.05975	7.37828	9.04102	12.1263	8.46992	4.1331	5.2002	6.19433	10.7465	7.71725	7.06846
Atp5j2	14.2338	15.0149	12.9951	8.08051	7.2546	6.75911	9.43651	8.31899	8.02963	9.23348	7.24257	9.67744	6.10303	9.0953	6.6884	6.51404	5.93861	6.21319	13.2171	8.26607	7.4923	2.83599	8.48764	6.35985	6.88994	9.60839	7.70949	12.6332	19.6853	10.5829
Tomm6	5.2055	5.48244	6.28069	18.6971	9.87594	8.06702	6.35939	7.65033	5.58787	11.971	4.44074	9.9112	8.11606	14.0484	8.02435	5.12965	5.90941	5.11438	6.28286	9.61443	10.2384	8.06654	5.89813	6.51663	7.756	3.40797	12.0371	9.59394	10.7492	10.8524
Rnf5	13.8123	24.1421	5.3169	7.74776	4.80857	8.86111	4.44093	4.74784	6.57397	5.43999	8.63122	7.49573	8.53602	6.03322	3.78735	4.21497	6.12358	6.47226	6.66831	8.4224	10.3049	10.357	19.1561	8.10553	5.86095	9.49524	8.49678	7.76504	7.72328	5.67776
Atp6v1b2	11.986	9.34332	14.1034	6.745	14.7638	6.48351	12.0654	9.21178	10.2836	5.92043	6.95797	10.5709	9.70459	7.62608	9.93099	6.06906	7.77861	6.46779	6.24817	7.92409	6.94119	9.395	6.69188	9.94018	6.01101	9.47261	10.0169	23.0682	10.5863	7.0469
Eif4b	7.11319	4.89559	4.0961	8.21092	5.14668	9.13203	9.26176	7.86699	6.6444	6.55101	19.6178	9.4281	4.52363	11.6446	11.2713	5.3027	9.63807	17.8981	8.02895	8.9549	5.43037	10.9358	5.9217	9.02921	8.61349	6.28188	10.0565	7.11091	11.8715	10.7806
Nckap1	11.4868	14.5015	10.7061	8.79099	5.00476	7.54385	10.0899	8.48335	4.82717	9.30354	7.71854	11.7708	8.54058	12.521	8.09352	6.41104	6.70284	12.279	10.4033	9.37016	8.44725	9.71983	21.5845	11.9994	14.2	9.99761	9.12067	11.939	5.85883	20.9574
RGD1562987	13.938	13.0382	11.8546	6.44822	6.45317	5.32974	7.81817	9.83187	8.54616	9.23348	9.3967	6.47241	25.4529	7.69154	11.4572	6.39043	8.59152	10.26	8.04437	7.05449	6.17153	6.35911	8.13399	6.31325	8.76784	14.6095	9.64058	14.293	18.6867	10.202
Wdr83os	5.71569	11.6135	12.8304	5.37352	7.17529	11.589	5.31848	4.23234	5.32022	7.61199	6.34952	8.1918	8.69122	3.33482	7.05589	5.63644	7.63744	7.14673	9.30865	8.16347	7.05046	8.3289	8.16543	21.9608	10.157	26.6618	6.63501	9.2335	4.52838	7.24454
Plxnb2	11.5201	6.64071	3.562	5.20265	5.30112	8.39867	11.1954	9.60401	12.2135	7.89725	9.43595	9.65147	5.17182	17.3651	4.32346	10.2511	5.88507	13.9227	11.8025	7.19128	7.40203	7.31694	6.61329	6.57594	7.22864	6.0918	8.32348	8.79741	16.6714	6.88519
Nrep	14.4926	14.1269	11.698	7.86018	14.9809	6.42279	10.3407	9.67872	13.7725	10.5447	10.275	10.2073	5.96152	10.3754	10.4109	8.89964	7.02411	10.0814	4.27851	11.4758	8.16219	10.8359	19.3998	12.1943	12.7809	9.92519	7.50648	13.5454	9.33129	23.1207
Gsn	14.1524	16.123	11.3486	8.44474	14.0793	11.3415	9.43271	10.1195	13.2982	7.88223	8.63122	8.17102	9.54482	10.1245	14.9289	19.3402	8.13882	5.47172	6.37922	7.57723	8.72281	13.2721	6.33823	7.70724	9.9769	11.9392	21.6232	8.10323	5.33691	11.3843
Uqcrh	5.53454	6.7102	11.7422	17.9687	9.69228	6.57226	8.11829	4.21366	5.57378	7.8422	7.02176	8.4827	6.74665	4.65493	8.94524	5.59936	7.16528	6.62413	5.40403	21.9061	7.82012	5.91768	6.69581	11.9401	10.7143	11.3418	9.05135	11.5563	10.6617	11.9233
LOC100911329 /// Ndufv1	11.5571	12.4861	10.947	4.62258	9.22061	6.97398	8.80969	11.5278	12.237	10.0993	9.36726	6.92433	7.20312	11.5028	25.3658	7.73774	7.102	10.6754	10.28	9.2236	9.64925	8.6329	10.362	7.25388	12.6823	8.39998	10.4675	10.831	14.2247	10.6871
Uqcrq	10.3407	21.451	12.2602	8.46273	6.03994	6.66101	6.22263	8.76725	9.71069	6.73118	6.64393	10.332	8.61818	21.3254	8.90201	6.37395	6.52761	11.6179	11.0046	12.4773	12.1863	12.8473	11.8866	9.24107	10.217	5.53512	7.62036	11.227	9.76874	14.2232
Oxct1	12.2041	16.123	13.5332	6.60111	10.285	5.8062	9.31495	24.3593	14.3312	10.3445	9.17098	11.7708	12.836	7.20059	11.8809	6.82306	7.764	9.60789	8.56859	11.124	7.07897	11.0316	21.6121	12.8129	13.1067	11.7672	7.70949	10.0879	5.04427	12.1389
Morf4l2	6.82852	6.99205	6.13613	7.59937	7.99342	9.25815	25.164	7.79602	5.38596	12.8468	5.32398	6.34774	11.7952	22.0673	9.76238	6.8519	6.23554	4.05577	5.73937	4.94889	7.12648	8.08736	11.1361	10.0249	9.25232	7.68037	6.07549	5.54455	6.86346	6.37491
Mrpl41	3.28301	17.7755	4.07603	5.08124	7.01668	8.51545	5.2615	5.61074	6.61623	5.85537	6.92853	8.47231	4.29083	5.11315	7.39312	9.04797	5.65628	13.5297	22.3947	9.10635	6.52785	6.95463	4.74286	4.41927	6.33685	4.67521	4.53558	7.45355	10.8548	8.07824
Kdm8	12.9028	11.4629	15.4005	4.46519	12.6642	8.53413	6.26821	11.7333	10.3023	6.29578	7.11499	8.81515	8.19366	6.84056	9.84452	7.58529	8.93226	7.90607	7.10773	11.041	7.21199	6.4424	10.5113	17.0288	9.03795	12.6679	8.98698	8.39247	9.06882	23.0381
Srrm1	6.14456	5.45156	24.6529	5.0003	8.84494	6.2266	7.85996	4.53865	5.79918	8.21254	7.74798	5.78673	6.38147	13.0993	3.796	10.3747	6.07491	11.5732	8.5763	8.69598	6.05275	10.9067	8.96311	5.97428	5.7409	5.57132	7.37279	6.91956	6.55574	5.12436
Dag1	11.9601	11.3085	5.45344	8.60662	11.6124	5.53994	5.19312	10.6201	29.4185	6.55602	8.34172	6.17112	6.6234	5.11315	7.25909	6.97138	5.08189	6.38293	4.79502	7.23036	8.67055	7.18368	7.64674	11.9401	11.1988	11.378	5.08024	7.52029	13.0029	4.52784
Vat1	8.48481	20.6325	7.97536	5.6748	10.1139	4.31611	4.62708	5.34179	6.60214	5.0146	7.45848	11.2046	8.44472	6.87693	4.69528	20.3991	7.51575	14.2041	9.76349	9.11124	5.59191	6.09675	10.3581	8.45297	9.46241	5.89266	5.2783	4.05829	6.67038	7.37031
LOC691807	11.0913	12.2506	8.2926	5.96258	6.98328	8.51545	11.9932	7.19834	7.58824	9.18343	5.85883	9.30863	8.72774	11.3137	13.8783	9.08917	6.54708	7.5264	9.98319	10.572	6.20003	8.85362	20.7594	8.3767	11.6876	7.73921	12.1807	9.70964	18.373	15.0856
Ddah2	6.13347	5.71024	10.8065	5.8052	9.27487	7.01602	3.1759	7.63539	6.16075	6.67613	8.07184	11.4696	10.193	11.2773	10.5363	6.31215	8.67427	9.66149	7.29274	6.0139	7.19299	9.50327	10.3699	18.7957	7.87176	8.47692	9.16523	7.31115	8.22107	10.4536
Epb4.1	21.6058	14.9261	10.674	7.39252	15.9868	5.69876	6.23782	4.85243	4.40925	6.13063	6.75188	8.13986	8.02477	7.05149	21.319	6.46048	8.70347	7.59787	7.48547	4.32356	5.20233	6.90049	10.0673	4.96162	8.15473	5.51701	6.14481	6.64812	12.6288	10.7518
Pea15	11.546	8.4476	4.7828	7.34306	6.66188	6.81983	5.06016	7.40752	5.21691	5.63017	2.75767	9.59952	4.89338	7.69154	11.7468	14.3053	8.09014	12.3102	10.5614	6.5513	5.63942	10.8817	9.82759	8.72838	12.3993	7.43598	9.79407	9.17565	6.74279	9.78156
RGD1304567	4.23316	13.1231	22.4442	6.64158	13.1902	4.56368	9.28835	4.24728	7.55067	8.63292	8.20923	7.32431	6.87446	7.40788	21.6303	7.13619	8.29459	7.40134	4.19371	9.72679	7.97215	4.28105	11.2972	9.919	5.05919	12.8534	10.1902	11.8456	5.44552	5.6023
Cers2	11.0506	8.29316	10.2844	6.27735	3.3852	6.1939	10.0063	5.19984	6.38144	6.57103	7.27201	7.59962	7.42223	5.26589	7.96814	16.9629	7.58877	9.14782	8.37201	9.27734	5.59666	4.2644	7.15948	7.99113	8.17188	10.7172	5.85763	12.206	18.373	7.51046
Mapkapk2	12.6995	11.3162	7.5296	5.46345	11.4454	5.58666	7.78018	8.27416	6.14196	7.88223	6.99723	8.83073	7.6322	17.4305	9.343	5.19558	9.7695	7.49067	4.33633	7.52837	5.38286	10.9067	9.12422	7.63098	10.9802	13.3694	10.725	13.2695	19.0789	8.78616
LOC100910270 /// Plac8	4.00764	3.07712	7.02763	8.094	7.99759	12.0328	10.9523	24.3593	9.43834	12.6416	11.5312	11.1059	5.83371	7.52062	4.45317	6.17206	6.30856	6.49906	4.0087	6.67832	9.82979	6.50487	7.08089	7.31743	7.32726	5.49439	11.9826	4.36533	13.0029	3.439
Rnaseh2a	14.3669	10.0614	7.6822	7.47796	13.6201	8.85644	21.0916	4.86738	5.75222	13.5875	7.2622	8.11908	5.97521	5.80775	21.3665	6.32451	8.54771	10.8541	10.5421	8.34423	5.74394	5.29302	9.90225	8.6394	6.78275	15.4015	8.30367	13.5677	2.64281	12.2467
Ubl7	6.18522	5.09636	3.41744	7.44648	4.65831	6.26864	5.47044	9.82067	11.2509	7.31171	6.10908	5.92178	9.37593	9.72807	5.24868	7.05791	20.1718	5.34218	6.78395	8.95002	11.8917	23.4334	7.80392	7.86825	6.64984	5.90624	9.57125	6.86616	9.18346	9.74204
Emc6	7.94504	12.5092	8.81466	7.71179	6.19855	7.23089	3.41143	6.80611	8.29259	8.76304	7.78233	8.1918	4.4506	7.98611	9.02307	6.53876	8.04633	6.71346	22.3947	7.75799	10.2099	6.80888	10.3266	6.28359	7.54163	6.9155	9.3831	3.85359	11.7026	9.82109
Pmm1	7.1095	11.5942	8.7504	4.80694	8.38161	9.37493	10.8041	5.5323	7.97328	7.622	9.20042	11.6773	20.1304	6.2587	8.65989	6.9343	8.44062	12.8641	10.9777	6.99587	7.39728	9.44081	12.6922	8.45297	12.5365	6.36787	10.725	5.49115	16.7559	8.68554
Abcf3	9.50521	10.4321	22.2394	7.98608	8.7698	4.53565	5.34888	5.92826	5.67709	7.09651	9.88739	10.1761	10.9188	6.89511	23.7834	6.71181	7.82242	9.03615	7.62038	5.90643	8.38549	13.2804	10.0398	8.98684	11.649	3.59353	8.43736	7.32895	10.4566	6.36053
Cox14	7.97092	7.63681	4.29288	5.05426	6.43648	7.88952	7.56365	5.12886	6.71014	7.02144	5.37795	10.9086	4.39126	7.29515	5.01522	7.12383	6.8002	13.0205	22.6299	9.72679	4.93152	8.10818	9.44643	7.16066	10.9502	23.6974	6.05569	7.91188	10.7885	12.527
Mtfr1l	13.938	14.1269	10.694	6.22339	6.80797	12.6307	7.84097	4.64698	6.03396	7.68706	6.35933	10.7475	6.9338	9.66989	25.3658	5.29446	6.83427	12.4621	8.7112	6.39008	6.11452	6.14673	4.95898	8.23264	8.74211	13.0616	4.82276	15.1296	19.6853	10.5829
Phf5a	8.92107	5.09636	9.68608	5.29258	9.15799	16.2648	9.10221	5.74149	7.76667	9.50873	5.94225	6.33215	10.9142	10.0481	7.47959	6.10202	10.12	5.38238	10.7156	8.08531	11.2503	5.85522	9.71363	6.559	7.71741	9.41377	8.65028	5.91834	4.40468	7.75482
Trappc2	6.28874	5.2006	5.32092	8.18394	6.75371	6.41811	8.28544	10.8778	10.138	8.67296	5.56442	5.39714	5.66938	6.67691	11.3145	15.9122	9.96421	4.34164	5.1689	9.3897	10.8798	22.8503	11.199	10.8596	7.3787	11.8985	7.7293	8.42807	3.39704	8.3729
l7Rn6	9.54218	11.2004	6.83086	8.87642	11.6875	6.30134	5.6186	5.56218	6.22179	6.38086	6.77642	7.82818	6.50016	9.74989	5.05845	7.89431	5.60761	25.7238	6.59893	6.61481	5.72494	8.7037	11.14	6.11834	8.05612	13.0616	5.88239	14.916	19.6853	7.99558
Rab11fip5	4.78403	7.28161	12.4088	5.60285	7.07929	7.40839	3.76473	8.61036	10.6357	8.01736	23.6071	5.55297	8.92402	4.38582	6.37278	9.63303	7.99279	3.57337	6.59893	4.59226	7.96265	7.92495	9.14386	6.23698	4.72906	8.228	5.06539	4.51218	5.34898	6.56896
Chp1 /// RGD1564956 /// RGD1565588	5.85988	3.26244	3.59012	3.93908	3.74835	5.26902	4.65747	4.06798	5.70057	5.30487	7.37015	7.28276	6.16693	7.41879	6.77054	7.71714	6.43025	3.9307	4.13204	5.54979	6.30456	4.86408	17.0067	9.89781	8.80214	8.39998	5.33772	9.45154	6.40489	17.2237
Gltscr2	11.4536	13.3393	7.62197	8.84495	3.89444	23.2622	9.1136	14.4116	6.59745	12.4614	4.06781	8.18661	4.69253	7.48789	7.88167	5.42219	7.06305	10.0948	8.93862	11.1045	8.75131	9.73648	4.48352	6.91915	8.65637	4.44439	5.31791	9.90988	9.13821	7.08642
RGD1307752	8.91737	6.18126	10.4852	9.00233	7.54679	6.77312	21.0916	7.66901	8.37242	11.2453	6.48691	7.30873	4.09911	3.47665	8.9366	5.00605	6.32803	6.06579	8.38742	6.99098	21.8165	9.98219	9.21459	13.1773	10.4399	6.64395	8.03134	4.06274	3.79527	4.14692
Mettl7a	8.69555	16.123	10.2563	7.14071	11.22	26.3498	12.81	9.18189	14.3312	10.4046	8.48402	7.48534	4.03521	6.0405	6.47655	5.46339	5.31068	11.9038	9.99861	12.0669	6.95544	8.33723	13.4348	11.3681	10.8044	7.77541	4.94655	8.19223	4.94471	10.069
Reep5	12.6292	11.7409	3.41744	5.95359	3.34346	7.64195	3.83691	8.56553	27.3618	6.1056	8.42513	9.4333	5.33159	8.20795	6.75757	16.7033	7.764	10.0501	8.36044	6.30703	6.81766	5.5637	6.94729	8.58008	5.87381	12.8942	9.04144	6.33218	11.8685	11.7221
Ndufs2	12.1301	7.08857	10.4531	8.61562	9.22061	9.3796	7.76879	9.33879	10.1521	6.14564	8.95017	7.4334	7.59112	20.4526	12.858	7.03319	8.34326	8.63415	7.06533	9.83427	7.63008	10.94	6.58185	9.17327	7.45588	12.0704	7.01628	10.7376	16.6714	7.6003
Nnt	14.378	14.0883	13.9629	6.96534	8.46927	12.6307	7.84097	9.08477	8.73868	8.85313	6.693	8.28011	7.71437	9.27349	7.25909	6.06082	8.35787	6.8162	10.623	6.83953	6.93644	7.29612	13.9575	9.9529	10.3199	14.7407	5.81306	12.2995	19.6853	10.5829
LOC685273 /// Snrpc	6.3405	20.9182	3.82705	6.43923	6.03576	5.61001	11.4613	9.82067	8.95938	8.64794	8.51346	10.1969	6.11215	3.91669	19.2567	5.31506	7.55956	8.65648	4.25538	12.1304	8.77507	9.50327	9.82759	6.38528	6.63269	4.14116	5.69918	6.47902	9.01754	8.45556
LOC100912030 /// RGD1562079	10.6772	3.44004	3.88728	17.8563	7.66366	5.94633	9.79361	5.73028	6.51292	8.94321	5.47609	6.79966	3.90283	4.46219	8.56478	7.27628	10.1492	6.95466	8.05208	6.02856	6.09076	6.52986	4.91969	7.41912	8.9179	13.1702	6.48647	11.5163	8.5288	21.3635
Rnf4	14.2338	15.0149	15.5692	7.22165	8.98686	5.56797	9.99115	7.39632	8.52268	10.7599	8.07184	6.17112	13.0688	20.5471	10.6746	8.59474	6.4838	5.33772	5.77021	9.78053	5.43988	10.407	6.70367	10.5927	6.14821	4.47154	8.00163	11.227	19.6853	10.5829
Notch1	6.12237	8.38968	10.168	6.38527	6.5617	15.6389	4.82083	4.66939	6.08561	5.53008	6.92853	8.50347	5.09879	14.9612	8.13676	4.65583	6.20634	10.9256	6.94198	9.63886	5.70593	7.6959	3.80372	7.62674	7.40443	11.8849	5.08519	12.1037	7.86206	5.96525
Apobec2	13.9306	14.3972	8.88292	7.48246	13.3112	10.2438	4.87401	5.21104	8.61659	9.84904	10.2211	8.11908	6.37691	8.57162	7.40177	7.35044	8.59152	8.73688	10.1142	7.30853	9.68726	5.19723	8.77056	10.4444	23.581	14.9172	8.49678	14.4087	9.08994	23.0381
Aimp2	14.0748	15.0343	7.58582	8.01756	13.7954	7.08141	5.89212	4.83376	9.24112	6.56603	9.99043	11.5475	7.80566	6.64055	5.30056	7.65946	8.63533	7.67827	17.8117	7.9192	6.75115	7.62094	7.94931	7.57166	7.35298	10.0881	9.48213	12.1882	15.9806	12.1641
Cd9	15.6978	11.4822	6.91519	5.45896	8.04768	7.36635	5.87693	7.40752	4.54073	6.16065	6.82058	8.25933	4.00326	3.25845	4.12458	4.8948	6.8002	6.94126	5.7625	8.94513	6.23804	5.35965	6.32644	9.27073	22.7921	4.08232	7.65502	6.87061	4.20557	6.06586
Ltbp4	11.0913	12.7795	9.34876	18.6387	4.04889	10.4399	8.7755	5.6593	4.28247	6.45092	6.07473	10.2333	6.73752	5.52773	9.07927	5.54579	7.33078	12.2834	6.78395	9.13566	19.7641	10.078	5.35193	6.28782	7.67883	7.26399	10.6655	10.2036	10.1338	11.316
Rbm42	3.4198	7.58662	9.81057	7.44648	7.07929	17.8156	5.10575	4.60962	5.92596	5.85037	7.03648	11.0228	4.70622	3.99669	4.00353	20.0201	7.69099	10.3494	10.8389	5.6133	6.62287	10.7318	11.419	8.27925	12.7723	9.10602	5.97151	6.98186	10.879	9.58392
Nubp1	10.7179	6.799	8.41308	7.93662	3.58973	6.08179	4.59289	20.7956	5.89309	6.37085	6.51635	7.92688	7.03423	6.54236	7.60929	4.91952	6.56655	5.63699	5.39632	8.3198	6.55636	6.83386	5.42659	4.87688	8.42913	5.20473	5.33277	5.86049	7.01431	10.0151
Hnrnpc /// LOC100911576	13.4796	10.3896	12.6256	6.37178	12.5307	6.77779	15.9175	9.54424	6.65849	7.12654	6.32989	9.74497	10.3117	6.90966	7.04724	7.04143	5.7147	12.9624	9.32407	7.54791	10.0863	10.5527	9.56039	6.88525	6.91137	5.20473	5.94675	14.1239	15.1057	10.6871
LOC100361475 /// LOC100911055 /// Tbrg1	20.907	14.9261	9.38891	8.5077	8.23969	8.30057	12.8479	7.16472	6.32979	9.19344	5.98641	7.86455	8.56797	4.84404	8.23187	7.6677	8.82517	6.63753	5.13421	9.8587	5.69643	10.0696	8.71162	8.99532	9.79683	7.96097	10.0317	7.10646	13.4765	13.0912
Hcfc1r1	8.21862	11.9185	12.2321	8.08951	9.14547	6.89457	8.03851	4.8599	8.24563	8.54284	8.9011	7.6204	6.58688	17.1541	8.92795	5.77652	10.1979	7.78547	10.8697	8.78392	10.0008	8.97439	4.75858	8.98261	5.59512	12.6814	6.05074	9.2068	11.0177	9.21379
Arpc2	12.5479	15.0149	9.90695	7.30709	24.8819	11.6918	11.9932	4.449	6.03866	11.6507	8.69501	7.28276	8.42647	12.481	24.1941	6.69533	6.77586	4.77044	4.81429	7.09357	8.17644	8.8328	11.2933	5.39804	12.275	4.08232	5.55063	9.66514	13.5399	15.1144
Kdelr1	4.04091	4.79135	5.05588	5.83218	6.01489	3.4613	10.2761	6.02165	7.96389	10.2294	6.45747	4.48809	5.87022	4.89495	14.8079	20.3991	8.46982	9.24609	12.1957	4.8121	5.87222	4.20193	5.56805	8.31738	4.579	3.48491	6.5954	7.17765	8.93306	7.63983
Xpo7	19.9864	13.4243	9.77041	6.96534	10.2975	6.39476	5.32228	4.67686	3.73777	7.05648	6.59486	7.93207	8.17541	10.2408	7.32827	8.35989	6.42052	15.0975	9.84058	12.4089	6.71314	6.6423	12.8454	10.5588	25.4417	9.72606	10.512	5.10846	8.4232	8.81131
Grb10	12.8104	10.0499	9.52143	6.02554	12.7143	12.5186	7.95873	21.5987	5.80387	9.28853	6.99232	11.1839	9.15226	10.1754	10.078	8.06324	6.07978	12.0422	10.068	11.2706	9.52097	10.1904	8.29903	9.40631	7.64881	15.2929	7.64512	15.1296	19.7547	9.55517
Etfdh	6.95052	7.70631	5.22053	8.31434	11.2868	5.00744	19.3441	4.81881	7.17971	6.33081	6.87456	7.37626	7.13009	3.3821	6.20417	6.34923	6.6785	26.1883	9.32793	8.97933	8.88434	3.26076	4.4678	3.97014	8.65637	5.92887	4.49596	12.2817	6.83933	3.24854
Sin3b	12.9583	13.0073	14.9227	7.36554	24.1472	6.68437	14.6866	4.71422	7.21258	7.0815	7.86084	7.22562	7.54091	6.78965	5.61185	4.47866	9.86686	5.34665	7.27732	6.70763	6.93169	5.32217	6.19284	8.70296	6.95853	4.11853	5.78831	6.71932	7.88318	6.92831
Gtl3	8.18535	6.8685	6.74652	7.45098	7.68453	6.53489	3.47221	5.23346	6.47066	5.6652	6.13852	9.79692	7.11639	9.04075	6.16093	9.86789	20.0745	11.5018	8.91164	3.82525	6.06701	18.9441	5.60734	9.0504	10.0498	6.63037	5.36248	8.59717	4.03059	5.7712
Slc12a7	2.85785	5.93803	7.13606	7.35655	7.29634	5.32507	6.44676	3.04818	6.15135	6.48595	6.65865	5.31402	6.61884	18.1033	7.298	8.77603	10.5337	6.03006	6.78009	7.03983	5.65842	5.22638	9.98477	6.19461	8.43771	8.31852	6.02103	10.3371	18.0562	7.79794
Ripk1	8.29626	9.91473	14.0874	6.6101	13.9791	8.86578	5.74396	5.14007	6.60684	7.68706	7.27201	6.47241	7.28529	18.3251	7.61794	5.7312	7.77861	7.24053	6.51028	6.26794	7.09797	7.43354	12.7786	10.7198	11.2374	14.9172	7.01628	10.2614	19.0789	13.4146
LOC678880	8.84713	23.7946	8.13599	6.83044	4.51221	6.48351	8.20566	8.90547	9.05329	7.91727	7.03158	9.57355	7.82392	7.40061	7.12939	5.61996	7.5985	4.44884	4.96847	8.19767	11.9345	23.4334	8.76663	8.24959	11.8291	13.9758	6.86773	9.0555	11.5367	4.21161
Dctn6	13.4241	15.6134	11.1398	7.90514	15.2021	9.22546	4.5701	11.4307	9.95956	11.1352	8.14053	6.7685	24.5673	13.6957	11.7944	6.86838	6.28422	7.66487	5.93595	9.98572	8.12893	10.5652	6.70367	10.3893	8.72068	15.3019	9.53164	14.5333	18.6867	9.72766
Carhsp1	14.6405	14.9339	10.5615	8.08051	12.2218	6.4368	4.912	7.83711	6.68666	7.02645	7.13462	6.61785	7.77371	9.979	7.47959	7.81603	8.37734	7.16013	5.18432	8.66667	9.9153	7.61261	4.60926	5.24127	22.0075	13.3694	10.3189	5.71809	11.1083	3.00059
B4galt5	10.1522	9.55953	14.2279	7.23964	14.3548	8.92183	22.2655	5.05042	9.94078	10.5747	7.41922	7.76065	6.88816	5.66592	9.29544	8.50822	6.88782	8.63415	7.47776	10.6892	5.30685	8.3289	5.29299	12.1519	10.1827	9.61291	6.52608	8.61052	18.6867	12.085
Tuba4a	19.8681	14.0266	8.2404	8.14347	13.7954	7.08608	5.54262	9.11092	9.9126	7.39679	9.0385	7.21523	7.80566	6.50235	5.65509	11.4789	8.27998	6.41866	7.72059	7.64562	9.34994	8.2581	21.6121	11.6647	9.27805	14.9172	6.18443	12.2995	9.87735	14.4531
Mrps25	8.60312	9.49389	7.42118	8.48971	6.56587	8.54347	25.164	8.64024	8.81381	11.8008	7.24748	9.98912	5.60547	19.0016	11.7166	4.9566	7.34051	10.9256	6.94969	12.0132	6.7464	9.42831	3.32826	8.95295	9.74109	10.8077	8.01153	5.50005	10.5803	5.41903
Dcaf11	8.01158	11.1039	5.40124	7.05977	4.59152	6.21726	8.93126	5.5323	5.17465	8.6029	3.22383	6.2854	11.1333	21.3727	9.52459	5.52931	6.14792	8.95575	8.44139	5.73544	8.68005	13.6386	12.7786	8.19027	13.1711	9.02908	6.84793	11.4317	9.46404	12.1174
Tsc22d4	9.98953	7.82986	12.3084	7.5589	4.64996	8.42669	8.01572	4.46394	6.41901	7.20161	6.7617	7.78143	7.76915	9.89536	6.9478	6.10614	5.06729	6.57053	2.59023	11.8861	20.9091	6.85885	8.82558	5.30482	6.13106	9.05171	6.66967	10.5284	11.6694	12.5306
Traf4	11.5016	11.8915	4.69446	7.66232	5.09241	7.33832	5.38307	5.28575	5.76631	7.27668	6.32989	5.64647	23.9876	9.75717	12.685	6.01138	8.15342	8.18301	8.19084	11.3487	6.93169	6.67145	5.65057	4.85145	6.13963	8.57649	24.2277	12.8246	4.08188	8.57414
LOC100910528 /// Mrpl36	4.60657	3.12345	3.815	7.68481	10.022	5.48389	5.14373	8.47215	8.09067	20.5138	8.68029	6.29579	6.16237	6.00413	4.18943	6.25447	8.34813	5.94519	6.06315	11.7933	7.98165	8.66622	23.2074	6.32596	8.56633	8.2461	5.94675	8.73066	4.38055	6.66239
Tcap	14.548	12.9687	14.0472	7.32957	10.9195	5.25501	8.68812	4.94582	7.31589	10.0292	4.73515	7.19964	6.71926	8.5898	5.59024	8.74307	23.0097	5.03398	6.64904	5.2469	5.62041	5.86771	22.5787	6.51663	5.76234	11.0023	5.33772	8.33017	8.15772	9.15629
Thap4	9.67527	5.8917	9.73829	7.40152	9.40009	12.6027	7.7346	2.69331	6.15135	9.43366	6.50163	12.041	6.52754	9.45169	11.401	6.90546	9.32654	11.1221	10.835	6.83953	5.0693	10.8567	6.47969	7.44455	19.5937	13.1702	5.22384	10.5952	19.4862	6.99299
Nisch	8.51069	7.94182	3.5098	8.75052	12.4597	5.97436	5.18552	4.63951	6.82753	7.39178	9.17098	8.22816	8.51776	11.1391	13.2039	20.3991	7.40379	11.4348	9.04655	7.82638	14.538	9.91139	3.52866	9.07158	5.02061	7.52197	4.93665	8.63276	6.80916	5.14592
Nadk	4.64354	10.1618	7.4774	6.4797	6.83719	6.52555	7.85616	10.8031	8.09067	7.74711	8.44476	10.2125	6.82881	18.427	8.64692	3.80295	10.6506	6.63753	5.57363	11.2217	7.18349	6.73808	8.07898	7.45726	7.77315	11.4233	10.6012	10.5952	18.0562	8.04949
Irf3	6.35529	3.72575	6.95936	6.73151	5.27607	8.69295	14.793	6.45123	9.01103	6.81125	10.1278	6.01529	4.88425	8.03703	5.49944	7.46169	6.73205	4.51584	6.98053	7.00564	4.827	5.21806	9.21066	5.47007	8.87503	4.00085	12.354	7.3779	15.7302	4.30863
G6pc3	9.52	8.19278	5.09604	8.57515	5.2552	4.15729	11.0586	4.23607	6.57866	8.30262	6.99723	5.8075	6.90642	5.37499	6.00097	16.9629	6.83427	3.94857	11.6985	6.76137	6.53735	4.10615	4.82538	8.23264	6.83849	3.86055	10.4378	5.25976	4.49821	2.28907
Epn2	9.68267	5.79131	9.87482	5.60735	16.6004	7.8755	7.65862	6.13745	4.30125	6.02053	5.55951	9.59952	9.26181	9.39714	10.3374	6.80246	8.83003	6.43206	7.07303	7.72379	7.15498	7.71673	8.13399	24.1344	12.3479	9.65817	8.01153	7.20435	7.29186	6.94987
App	10.4073	8.08854	4.44146	6.90688	9.50862	9.28618	11.4689	8.40864	5.84144	7.83719	7.44376	9.85925	8.35343	5.58228	7.56606	14.3053	7.81755	8.14728	6.52569	9.1894	7.77261	10.0738	10.806	9.06311	12.2192	11.4006	12.1807	8.01423	19.6853	15.0856
Ghitm	4.40323	6.68704	3.97563	7.2891	8.16038	8.58084	25.164	8.28164	5.96822	11.3304	6.41822	9.30863	7.03423	11.1391	11.7166	5.3233	6.56168	6.36953	22.6299	11.935	6.64188	13.2721	4.89218	10.7537	13.2139	9.59028	10.3585	7.66714	5.25244	9.02693
Mrps36	10.3038	8.92635	12.8304	7.09125	9.1246	6.39476	5.24251	5.43144	15.956	5.84537	6.75188	7.79182	5.99804	3.8185	9.45109	5.78064	6.57141	6.50353	5.24985	3.5419	9.95331	10.7151	7.06518	6.24122	6.58981	14.9172	5.05548	15.1207	19.6853	14.331
Ndufs1	14.8993	12.7216	12.0474	7.9591	13.8914	4.09657	8.74891	4.93461	8.43346	9.99918	10.0493	9.76575	5.8611	4.6622	8.24917	8.86668	6.83427	8.82622	22.7301	9.48253	8.26196	6.88384	4.79395	10.4274	9.37237	9.28252	5.48626	6.99966	13.8597	9.39706
Prkaca	8.79537	13.1501	11.8667	9.64535	7.10016	7.52984	10.485	10.7284	11.5514	8.51782	7.02667	6.75291	10.3482	9.3535	10.1428	3.56398	8.42115	4.58284	5.17661	11.0361	6.78916	23.246	10.641	7.86825	6.86421	5.64826	8.26406	5.70029	16.7831	12.545
Erlin1	5.28314	14.9261	9.90695	7.09125	27.0357	5.14757	8.65773	8.39744	6.94962	9.67388	7.52227	9.40213	10.8732	6.50235	11.8809	6.28331	6.51787	7.4862	4.03953	10.0492	6.36632	8.04155	11.2933	12.8129	24.5628	8.44977	11.8985	7.88518	11.9289	12.4408
Gspt1 /// LOC100911685	5.956	4.29716	6.30077	6.90688	5.70601	13.0371	25.164	5.41276	6.07153	8.83811	6.03548	5.48025	7.47244	3.49847	4.17214	5.04313	7.67639	11.1891	5.86657	7.70913	7.68234	19.0399	5.86276	7.12253	7.50733	9.51334	4.57519	4.97941	5.96443	5.30404
Lamtor3	6.80264	3.54042	6.44534	7.43299	4.50804	6.56759	4.41054	15.7004	7.56006	6.05556	4.35241	9.12163	7.13009	9.80808	3.89112	6.65825	8.02686	11.1221	12.2304	5.63284	5.64892	24.2829	7.82356	5.06331	4.32175	7.59438	6.68453	4.99721	4.48011	9.45096
Ubl5	11.631	6.38589	13.5332	7.33407	3.4979	26.7468	10.0139	4.93835	10.1145	9.77898	7.87556	6.16593	10.1063	7.30969	7.31097	9.35286	6.81967	26.4965	10.889	6.84442	10.685	9.94887	9.42285	3.98285	6.77846	9.36399	8.48688	9.96328	3.89483	12.2467
Mrps18a	14.2929	15.0149	11.3486	7.84219	9.32913	5.58666	21.0916	5.49868	6.5411	7.04146	8.58706	8.38919	9.53569	11.2482	13.005	8.40933	7.09226	5.05631	8.03281	8.47125	9.04112	8.85362	24.4491	8.10977	13.0124	4.85171	6.7588	9.60284	10.0825	12.5306
Fis1	4.14443	8.60203	5.4173	6.73151	12.1133	3.93775	4.46753	10.1793	11.8378	6.13563	7.38487	7.75027	7.26703	16.6486	5.36974	20.3991	9.82305	14.2041	8.91164	4.646	7.28801	7.86248	5.7213	5.4277	5.10207	10.5362	10.6952	12.7445	6.00063	5.02374
Rnps1	7.57903	5.17743	9.40899	16.215	5.48478	7.62793	4.89301	5.10645	7.22197	6.41088	21.9338	6.8568	6.82881	3.74576	6.37278	5.26562	8.0366	5.15458	4.51364	7.9192	10.1576	4.44347	8.08291	4.50825	5.7409	5.89719	4.39693	7.24885	5.20718	3.3815
LOC294154	11.8713	13.0073	11.188	7.74326	6.84971	7.08141	4.45613	9.11465	9.68721	6.59605	6.51145	5.99451	5.45484	5.07315	5.59024	5.29858	9.09289	7.65594	8.49921	8.01691	22.2631	7.80418	14.4408	13.0544	12.1078	13.1702	5.07034	11.5875	19.4862	9.84265
Pkig	6.0891	6.60596	3.82303	6.92937	5.92723	6.93661	5.18552	22.1553	10.1145	6.41589	6.14343	9.70861	9.54482	7.36061	3.91706	5.01017	7.86623	8.62968	23.235	4.82676	7.40678	5.88853	7.56815	8.18603	7.12575	4.99654	5.51597	7.05306	6.8514	4.40566
Tspan9	17.6536	7.62909	4.48965	8.51669	7.6261	7.85682	5.66799	8.54686	8.33955	8.61291	7.27201	8.78917	6.07107	5.93503	9.20897	6.15558	7.02898	6.48119	6.87645	10.4107	22.1016	8.72869	5.20654	7.84283	5.00346	4.52133	6.12006	13.403	11.594	10.9315
LOC100910710 /// Ndufa12	8.5033	8.94951	12.7863	8.54817	10.7149	3.82564	4.98418	9.72354	11.5749	7.49188	9.80888	9.65147	5.66938	5.6041	8.69016	6.74477	7.1166	25.8399	6.11712	8.99399	8.53752	10.0738	7.93752	5.81327	11.0102	8.94308	7.00638	10.3638	13.8597	8.16807
Wdtc1	7.9857	4.81065	9.11182	7.19467	7.88072	8.22117	5.40966	5.17369	8.29259	6.51598	8.03749	9.55797	7.20769	11.03	6.03988	9.56299	9.07342	4.58731	6.12097	23.484	9.35469	11.1108	7.92573	6.61832	7.12575	9.10149	9.56135	10.0612	18.0562	7.72966
Map4	3.85236	4.51723	6.6903	6.83943	5.8521	10.2438	22.2655	8.69628	7.07641	14.8036	5.74106	7.4334	6.11672	3.65848	7.84708	5.50047	3.89904	6.99486	8.74204	6.33145	5.50164	4.54341	4.86075	5.64802	3.88014	3.8515	8.66018	4.43653	10.2273	3.56477
Mrps34	11.4018	5.64074	9.18411	6.95635	10.0012	5.69876	5.39446	4.6806	5.64422	6.91134	7.44866	6.92433	13.1464	21.3727	9.76238	4.97309	6.97057	8.99148	10.1644	11.5002	9.673	13.6386	11.9927	7.61403	13.0081	6.72089	11.3389	7.2978	7.34617	9.72048
RGD1303003	9.99322	23.7946	11.7422	8.40427	11.7668	8.09972	11.1954	8.23307	8.75746	9.10836	6.01585	6.75811	6.44081	6.21869	6.61922	7.6677	6.58115	8.75475	6.86875	8.99399	8.73231	6.17588	5.23012	6.70306	21.0857	9.16033	5.08024	11.6676	9.76874	11.1184
LOC100909510 /// Tsen34	9.66048	3.0694	9.12789	6.45272	4.50386	6.42279	6.78487	2.6186	4.16977	27.0298	6.53598	8.50347	4.24062	4.00033	4.03811	7.46993	6.02623	4.56944	7.50859	6.77114	6.53735	3.33572	7.37953	8.11824	10.9159	22.0273	6.84298	7.75614	5.12271	6.72348
Elmo2	11.509	8.83755	7.55771	7.45548	7.8348	3.09695	8.4222	4.70301	5.79448	9.73393	6.29554	8.69567	10.7316	7.82974	15.2748	19.1548	6.84887	4.52924	6.03232	9.58023	10.1624	11.5105	10.2873	11.0757	11.1217	7.10559	8.49678	5.07731	13.567	11.413
Atg12	13.4796	8.17347	9.666	5.71976	11.4496	6.22193	11.9552	4.66939	6.36736	6.46093	6.93344	6.12437	5.16726	8.39706	5.86261	5.31094	7.54983	5.13671	2.76369	7.57723	5.73919	5.64283	5.93742	7.07168	8.14187	4.92865	5.98637	14.3331	12.3361	8.96943
Zc3h7b	8.07813	6.6909	6.30077	4.95533	6.45317	7.85215	6.19224	5.20357	3.49359	7.79215	8.22886	5.94256	10.1428	8.38251	5.84532	8.4629	6.6785	8.48228	14.809	4.3431	17.6452	7.38773	14.0871	11.6011	12.9953	6.70279	8.4027	5.64245	7.89525	5.96884
Pygb	7.46442	4.92648	8.26851	7.13621	10.0095	5.50258	6.06307	5.45385	7.64928	6.36584	5.03447	9.09565	10.1839	13.3575	8.78528	7.91491	7.51575	7.446	4.10891	6.89816	22.0113	5.74278	3.50115	5.11415	7.72599	13.1702	5.62491	10.5151	6.74279	5.00578
Amotl1	14.0748	14.8335	14.0472	6.8799	8.32735	6.10515	5.56162	12.1105	6.56927	7.72709	6.66356	7.3347	6.09846	6.10232	7.0948	10.3293	5.95808	3.7833	7.20409	9.80496	6.29505	10.8276	5.54054	5.21584	8.23191	12.8534	4.49101	15.2408	19.0789	10.5829
Ctnnbl1	7.09101	8.25455	8.75844	7.09574	12.8312	7.9082	22.2655	10.127	13.2982	7.75212	7.38487	6.7685	9.63155	6.18596	5.37406	6.21327	9.68675	5.44492	4.40186	9.20894	11.6352	6.67145	5.45017	8.15214	9.08082	4.32672	5.55063	3.61775	18.0562	9.03052
Ankrd13c	12.7476	14.3972	5.07596	7.05078	14.4174	6.14252	8.27404	4.72916	5.25448	8.07741	8.49874	9.39694	6.19432	17.1687	7.83844	8.27337	8.27998	9.18355	11.0201	9.37505	5.93398	4.29355	6.69188	11.4528	8.17188	13.9442	8.15512	7.66269	15.7513	8.89397
Rnf7	12.9028	10.4321	7.58582	7.31608	6.14429	6.79647	6.91023	10.3474	9.08147	6.58605	7.5468	9.52161	9.42157	6.9133	20.9299	7.77894	9.32654	13.4448	7.10773	9.56069	9.20266	8.3289	6.43646	5.52939	9.56959	10.8756	4.97626	9.48714	11.5367	18.6504
Vps29	12.9028	11.405	14.0472	7.75675	7.65532	8.35196	5.81994	10.5939	7.93102	8.58788	7.06102	9.1476	13.434	9.20076	14.9289	9.26634	6.47893	6.49013	6.42548	8.64713	6.62287	9.96136	19.4548	9.61393	13.1067	13.9758	10.1456	12.3351	9.06882	23.0381
Zfp706	5.51605	11.0151	12.0956	7.22165	9.97195	10.0756	25.164	4.86738	8.4945	14.0679	8.79806	9.60472	6.29018	7.97884	9.64997	5.55403	10.0567	6.79833	22.7301	7.90943	5.5349	11.1274	10.2402	10.7283	8.95649	12.2243	6.29831	11.8144	9.37956	7.79794
Cct7	7.16865	7.91094	9.83467	7.08675	8.57779	5.58198	6.70129	22.1553	9.1519	6.26575	8.43004	10.8826	9.49461	22.0673	14.2112	4.28913	8.64993	12.346	12.0685	8.1879	7.92939	12.8765	7.76462	12.4358	11.0831	6.38598	7.72434	7.72054	8.65249	6.95706
Twf1	13.4796	11.4089	15.5692	6.99682	13.5951	8.34729	4.5739	7.60177	6.33918	11.941	8.72936	8.49309	8.6684	20.5471	12.1662	7.51113	7.36972	7.78994	6.92656	9.07215	7.76311	13.447	12.6293	14.0713	11.8505	7.4405	12.1361	12.6733	19.7547	9.55517
LOC100360180	8.01158	6.27392	5.81085	18.9445	10.2892	5.86225	6.35939	7.42247	5.74283	10.3045	7.65475	6.06723	10.5582	8.45524	7.81682	4.58167	7.85162	7.50854	5.79334	7.7189	20.9423	6.3258	5.78417	4.62265	6.81276	3.98728	6.82812	4.40093	5.04729	3.13355
Tm9sf3	3.31259	7.25845	9.32065	6.63708	11.5331	7.93623	7.30152	4.21366	6.2124	7.61699	5.62821	6.60227	6.13954	3.45847	7.25477	7.68006	10.0129	7.1378	5.2537	13.3371	11.8062	10.0655	7.76855	7.05473	25.103	24.3355	6.80336	9.78528	11.7931	12.3725
Ddb1	19.1361	10.2661	7.94725	8.18843	4.65831	8.33327	9.23137	7.35523	6.17483	9.67388	6.79605	7.1425	6.99771	11.03	6.22579	14.5855	4.49777	9.88483	9.85599	11.8861	5.16907	10.1154	8.82558	7.16066	5.23927	9.31873	9.29892	7.09311	10.8699	10.3997
Mrps24	10.862	8.20436	12.4249	8.57065	9.18304	6.39009	5.2577	4.80387	16.5711	7.06649	7.02176	8.4827	8.80534	7.62972	9.85317	5.54579	9.96421	9.08082	9.44742	5.57911	11.0698	8.67038	10.4091	6.24122	10.0198	10.5769	7.27376	11.2448	12.1581	23.1207
Ccdc50	14.2929	15.0844	10.7663	6.47071	16.1872	8.19781	4.87021	10.0822	9.95956	10.2144	6.9776	8.42036	8.98793	7.94975	8.41778	6.5264	6.78073	10.5146	9.35105	8.09508	6.55636	10.99	23.062	9.29615	13.8913	7.20968	8.3928	11.0179	9.87735	23.0381
RGD1305350	11.5571	12.073	10.417	4.71251	7.71375	7.18885	9.17439	5.70413	9.06268	10.5096	9.17098	8.8567	6.55493	3.89123	7.52715	18.269	8.8203	12.2566	10.2029	8.4566	5.66317	6.31331	2.58166	7.49963	6.70986	8.47692	5.74374	12.3039	9.26794	12.5845
Mrps23	11.3094	13.0305	7.49748	7.53192	9.99282	11.6965	10.9333	9.37241	8.56494	8.83811	6.79605	10.6228	9.47635	7.51698	4.36237	7.47405	5.80232	8.84408	16.2237	9.34573	6.18578	6.29248	7.855	8.00384	8.39483	11.5817	9.57621	13.6878	5.07745	4.52065
Mfsd5	9.1281	10.9803	8.26851	9.38005	4.29098	15.2652	8.55136	4.81134	6.25466	8.00735	8.60669	7.72949	8.31691	6.90239	4.65637	8.45054	8.66453	20.8015	8.98873	5.56933	7.53506	5.65532	6.65651	6.38951	7.93179	8.20084	6.00617	8.41917	8.82445	7.08283
Pxn	3.14992	8.74875	14.3083	6.69554	11.2868	5.33442	7.79918	7.01903	5.46109	6.38586	6.79114	9.63589	6.56863	10.8991	10.5838	9.22101	7.23342	8.38848	4.62156	5.6817	9.56848	10.1946	7.79606	19.9355	5.62942	26.2047	7.78871	14.3509	8.50768	12.9978
Smarcd3	14.2338	15.0149	14.0472	7.23964	8.81989	6.42279	5.2653	4.61336	5.663	7.20661	10.1916	7.18925	5.87935	7.29878	7.74332	7.34632	8.70347	7.46387	6.15566	6.83465	8.89384	7.30444	5.93742	7.82588	23.581	12.7357	7.65997	14.916	19.6853	10.5829
Fam20b	12.8437	9.43598	12.6417	8.07152	14.5969	6.647	7.89795	6.70525	7.1938	8.99325	7.71854	7.97883	25.4529	8.72072	13.8351	10.284	20.7219	6.37399	6.58351	7.12289	5.81996	10.686	14.1932	8.60551	13.5398	14.0437	8.84834	6.40783	12.846	12.1425
Cbx7	9.80837	25.1459	8.43717	9.16871	13.6159	11.3602	11.1194	4.97197	5.4517	10.8149	7.69401	8.43075	8.17997	8.14613	6.76189	6.86014	7.72993	6.9904	4.76418	7.54303	8.38074	10.6901	6.14175	24.1344	8.12472	12.3329	7.77386	10.8889	8.80635	5.90775
Vps72	4.76924	11.1927	11.6779	6.92037	11.1908	7.22155	8.74891	2.9772	7.21728	8.61291	6.59486	8.12947	26.1558	11.59	10.1083	4.80828	7.9003	4.94465	6.03232	9.12101	8.6753	8.50797	9.05348	11.2452	9.80969	6.66206	6.68948	5.07731	13.3981	9.76719
Klhdc3	14.1229	14.8142	13.3967	5.99406	8.87416	7.46444	7.3547	5.32684	7.03414	7.83719	6.21213	9.16838	9.02444	7.20059	6.08311	8.52882	8.2167	7.32093	4.98003	7.79707	7.77261	22.5505	10.0044	12.063	10.4657	11.6405	7.36288	23.3797	7.12895	11.2369
Cers5	3.44199	9.10395	14.3083	5.36453	12.2761	6.96463	4.17501	5.36046	5.09482	7.42682	7.89028	7.35028	6.89272	3.41483	4.09	15.3478	6.18687	8.83068	7.8979	9.57046	4.43742	5.86771	10.6253	9.25378	10.7744	5.32693	6.02598	24.4654	3.32765	6.08024
Urm1	6.43293	7.61751	3.64232	7.78823	10.9236	15.5828	6.39738	5.0803	7.10458	7.07149	9.23477	7.85935	10.2706	8.10976	4.6996	9.29106	9.51638	5.17245	16.8134	9.75611	9.24066	8.02906	9.21459	10.8596	13.274	10.6991	9.04144	12.166	5.21623	8.29744
Synpo2	14.0748	13.0073	12.5775	17.9057	7.89741	6.49752	7.50666	6.35411	5.76631	12.2913	10.0935	11.6773	9.00618	9.939	11.5264	6.22563	9.24379	8.78601	7.92103	7.42089	8.73706	8.78282	9.80401	12.7112	10.8987	11.12	7.96697	13.274	19.0789	10.5829
Gabarapl1	14.0748	10.1425	24.3517	6.8844	10.5563	7.47379	4.62708	11.5315	10.1098	6.16566	8.20923	10.2125	6.29018	6.76419	8.99712	15.9905	6.17226	10.9166	11.6252	8.5885	10.2289	6.37994	7.00623	4.99128	7.05715	14.6819	12.359	8.79741	13.567	14.18
Map1lc3a	12.9435	5.8917	12.3084	8.04454	8.44005	6.04442	5.21591	5.48747	6.56458	6.18067	6.70772	5.67764	11.0192	12.8556	8.84148	8.45054	8.17776	27.0013	10.7078	6.62458	4.87926	11.9728	9.66255	6.96152	8.19761	11.197	5.98637	10.435	6.86648	7.07564
Kbtbd2	6.63257	5.14655	12.7702	8.43575	25.7083	4.63842	5.07915	9.75343	11.4528	6.58104	8.40551	6.9503	5.80175	6.76056	7.99408	4.20673	7.45734	5.36452	4.98774	8.30026	7.23575	11.1857	10.8532	9.04616	20.8499	6.87024	7.22919	3.96039	6.57384	5.8251
Canx	11.4203	8.80666	12.0072	7.11823	5.75192	8.04366	8.02331	7.34776	6.99188	8.0574	7.13462	7.09575	10.9644	9.92082	7.88599	5.38923	9.73056	6.52139	8.08292	6.79557	6.72739	8.47466	13.2502	9.55461	9.89544	22.8827	9.63067	10.5507	8.68266	12.6312
Tram1	10.7807	14.8142	11.4691	6.4797	4.54143	12.3691	11.4157	10.127	26.5166	12.9869	6.94816	7.54248	8.14345	3.15662	6.55005	6.97962	21.71	5.31538	3.85451	7.85081	6.35682	10.3403	11.0772	6.31325	8.33052	15.2521	4.86733	11.7121	4.27194	9.63064
Rarres2	10.5958	9.13483	4.79485	7.97259	13.6201	8.70696	11.07	6.04033	6.09501	9.61883	7.64003	10.6228	8.76882	10.3354	9.04468	15.9617	6.89268	12.346	10.6539	11.1582	9.32143	9.37001	11.6273	5.40651	9.74109	13.3105	11.3142	12.8512	8.50768	23.7604
Mllt11	13.0951	13.8258	14.6295	9.59589	16.1872	7.50648	5.42865	5.1326	5.64892	6.81125	10.6381	9.25149	7.27616	7.52789	8.76798	7.33396	10.266	9.11655	8.21012	9.86847	9.07913	7.21699	23.062	12.0164	7.48589	12.3194	9.70495	12.2995	18.0562	8.78616
Dpysl2	19.8681	12.8258	12.9188	7.67132	14.6219	8.73499	7.88655	11.5876	11.5326	7.52691	11.8403	12.4981	7.34463	10.059	12.6721	6.73241	9.24379	8.58055	11.1858	8.39309	9.83454	10.4569	5.88241	5.90649	18.5561	12.0433	12.6511	9.60284	9.41275	14.4531
Tpr	5.73788	9.25066	7.69827	10.0006	10.7483	7.01602	9.1136	8.90547	7.67276	8.30262	6.66847	5.45428	8.61818	9.11712	12.9747	18.6316	8.38707	5.76652	5.49654	11.2461	11.3168	22.5921	10.4249	4.37266	7.13003	6.8793	7.47677	9.05105	5.21925	4.67517
LOC102553715 /// Mfap4	8.86191	14.9261	11.5253	7.76575	8.38161	9.1694	7.76499	5.16248	7.69624	8.57787	7.70382	7.34509	4.84773	9.63352	6.08743	6.9137	7.62284	6.06132	6.38693	9.84893	10.5424	8.07487	23.1367	13.4824	11.4904	8.11938	11.2746	12.6733	19.7547	13.6338
Ndufb9	14.378	9.55953	12.3084	8.05353	8.92842	6.66101	9.40232	4.75905	5.61605	8.54284	7.69401	7.39184	6.37691	9.38986	10.813	6.95078	6.78073	7.09313	3.48834	18.6573	7.9674	8.49548	7.65853	6.00818	9.74967	14.9172	7.42725	12.7756	19.6853	14.2232
LOC100363321 /// RGD1562289 /// Sdccag3	13.9306	11.9649	5.9273	6.70004	8.16873	6.95062	4.13702	7.34776	7.31119	6.05055	8.71464	9.92678	8.06585	18.8706	8.57343	8.60298	6.72718	7.14227	6.09013	9.10635	5.38286	9.49911	5.4148	9.09277	12.1978	6.57606	9.18009	13.5454	9.08994	23.0381
Tnpo2	7.78606	6.87622	7.34889	6.40775	7.9809	6.08179	5.93011	7.26558	5.41883	6.93136	7.48792	8.92943	9.57677	13.1065	7.12939	7.42461	5.09163	12.3058	11.9606	6.45359	3.03588	4.18111	7.88643	4.06336	9.74109	5.71615	7.60056	7.3512	16.4844	8.62445
Mrpl3	12.9398	21.451	8.51749	6.24587	13.9791	11.4956	7.51046	5.04668	5.81796	8.40271	5.57914	12.0825	8.1115	4.01124	9.92667	9.68248	5.34475	10.3494	23.235	8.71552	6.88418	9.99884	6.51898	10.33	11.7819	10.7625	7.31337	5.78484	9.87735	14.4531
Etnk1	13.4796	11.9803	14.9227	6.79447	14.9809	7.17016	7.93214	6.89202	28.2164	7.85721	8.65576	11.7189	4.95728	9.04802	12.1316	7.32984	6.6493	12.6408	10.835	9.34085	8.42825	8.3289	9.65076	8.97837	7.85032	8.45429	6.18443	11.5875	15.8026	11.0609
LOC685179	8.35911	8.29316	8.63796	4.08298	7.65532	5.61001	19.3935	4.99065	6.02457	5.71024	6.80095	7.0542	5.31789	6.03686	5.36542	20.3991	6.55194	8.82622	12.6467	7.92409	5.5634	4.09365	6.07495	9.01226	8.75498	8.59912	5.33772	5.21971	6.62211	5.10639
Sra1	6.09649	19.0843	10.3768	6.96984	9.07451	9.32822	25.164	7.14604	6.96371	14.0429	7.41922	9.37096	11.0786	5.8623	7.63091	6.21327	6.6493	6.7492	6.75311	9.37016	7.73935	10.0738	11.2383	7.77504	11.5247	11.0069	7.04104	11.2537	10.0946	10.8237
Rrp7a	4.14074	3.02693	5.40525	6.86641	7.21286	8.20248	8.40321	5.2596	6.78527	7.77213	8.8962	7.66715	6.66905	5.49136	7.91626	6.02374	8.82517	6.37399	22.5104	8.34423	6.70839	6.69227	4.70357	6.64374	6.75274	9.71248	10.3189	9.47379	15.3199	8.61726
Rragc	12.5257	12.7139	14.0472	7.37903	7.65532	10.2344	10.7357	6.07021	8.6119	5.36993	8.70483	11.7189	9.67263	4.67675	7.10777	4.80004	7.22856	7.513	7.32743	9.8245	6.92218	10.4111	18.1502	12.7494	10.6715	12.9892	10.2744	13.0737	9.08994	23.7604
Ube3b	7.94873	6.66387	11.7783	5.8007	11.4204	7.54385	4.45993	5.63689	7.09988	5.51006	5.43193	9.29305	4.85686	8.6589	6.29064	7.14443	7.89057	5.37345	5.10338	9.77565	19.7878	10.2071	5.55233	5.41075	8.21047	9.36399	7.62036	4.37423	19.6853	11.6538
Ypel5	11.8713	12.3509	12.1076	8.17045	9.76324	7.81011	9.1098	5.75269	5.64892	14.4833	9.65676	7.89571	11.7907	8.72072	25.8111	7.77482	9.86686	9.52302	10.3185	7.92409	9.89155	4.51426	10.7549	7.72419	12.275	14.9172	8.75921	13.1983	8.66757	23.1207
Mest	11.875	12.6096	9.39695	18.4903	14.0793	6.26397	7.51806	9.39482	11.6782	5.51006	10.4173	8.03077	9.17051	6.90239	8.36158	8.84608	6.83914	5.99432	6.64904	11.9936	26.7718	8.12068	4.0945	11.1944	11.0145	12.7357	10.6309	4.85482	4.62794	10.1948
Dpt	6.68433	8.27386	7.90307	6.83044	6.97494	6.22193	8.01572	22.1553	11.6406	10.3445	6.50163	8.69048	7.71437	8.47343	6.96942	15.9617	5.8802	9.98309	10.519	5.13942	7.21199	10.0738	8.68412	4.31758	8.17617	10.1877	9.19494	6.49237	7.75345	7.40265
Arl8a	4.699	8.17734	5.54982	6.6146	13.1902	23.8694	5.37167	5.84234	5.14178	7.70207	7.3358	9.26707	7.67785	12.6556	8.28808	10.4159	6.07491	8.38401	13.0128	3.82525	6.96969	6.80888	6.88835	9.2453	4.58329	9.23274	7.7293	5.45555	5.34596	5.45137
Smim20	13.4796	8.20436	13.9629	8.73253	12.8145	9.27217	5.9643	4.91967	6.38144	8.07741	6.82058	9.18915	7.45875	5.33499	7.64388	8.67715	7.04358	8.16514	6.00919	8.67155	6.86992	13.5553	10.5585	9.1309	23.4995	8.50408	8.25911	14.1239	19.6853	15.1144
Trim27	7.4829	7.11173	4.9595	6.14695	8.14369	5.30172	5.45904	8.73363	9.66843	6.05556	5.87355	6.06723	5.92044	3.55666	5.42594	6.86014	6.05544	6.64646	7.34671	12.404	10.7895	12.4975	23.1367	7.49115	6.08818	6.04654	19.197	4.73022	3.34273	2.72389
Ano10	3.57878	4.31646	4.85509	6.29534	6.32377	5.82021	5.08295	8.3937	5.36717	4.71433	6.29064	10.9657	8.64101	3.92032	4.58719	11.9239	4.90666	10.3806	18.2588	4.05975	3.76278	6.67561	5.05722	8.4445	4.55756	7.12369	8.86319	6.73267	3.4091	16.5949
Letm1	10.3075	20.6287	7.90709	8.88991	7.48835	7.38971	7.69281	5.13633	6.5411	6.53099	7.9737	8.99696	7.15291	4.92404	8.49128	5.71472	5.49565	5.19031	6.84562	11.0898	24.192	11.3606	6.24392	8.54195	10.7958	12.0342	10.2793	12.6644	11.0539	8.36572
Sike1	4.85797	10.6213	11.6779	7.04178	8.71971	6.05377	6.07827	4.88232	6.48005	5.97048	5.39758	11.8436	7.49526	10.139	8.37022	18.4049	6.73205	14.0567	10.8273	7.79218	6.12402	3.80214	5.13188	6.20308	6.77417	21.5476	4.9416	11.1469	4.67621	9.08083
Guk1	14.2634	7.65998	12.0072	6.03003	20.8747	6.02107	5.6186	5.6593	8.73868	6.37585	8.22395	8.16583	8.9012	11.3027	11.4356	20.4898	6.08951	11.7653	12.4115	6.15558	5.79145	7.45436	5.62699	8.34704	5.24355	10.9164	8.93746	5.30871	13.2653	8.44118
Srl	13.9306	13.7563	11.5494	7.29809	10.452	8.59018	5.01077	5.95815	8.61659	8.16249	11.2417	7.47495	7.27616	8.57162	7.14236	8.4835	8.59152	6.09706	8.98487	7.69936	9.68726	5.27219	8.77056	9.58427	23.581	14.9172	8.2294	15.1296	19.0789	10.5829
Agpat1	8.16686	10.2777	7.70228	7.94561	9.84255	8.09037	8.88567	7.82964	8.64477	7.46685	6.74698	7.01264	12.658	16.7359	11.5134	8.01379	22.1481	6.64646	4.5676	7.47952	5.72969	11.5938	5.13974	9.69867	8.69924	11.9166	9.41281	12.4864	4.65509	9.63064
LOC102555690	8.7584	10.1039	5.76266	7.424	5.62252	4.97941	6.28341	7.78108	6.27344	6.30579	6.89909	6.6646	11.3479	8.94619	7.92923	3.79471	9.19511	4.75704	4.82585	9.23826	2.98362	19.1856	11.2972	8.525	10.2341	8.68059	9.26426	6.08743	7.39746	11.4705
Rangrf	14.2338	12.3509	14.0472	14.9874	6.03576	8.16044	5.01077	9.23046	9.82338	6.3158	10.1916	8.21258	5.61004	6.93512	10.6314	8.21981	8.78136	5.37792	8.07521	9.61443	8.13844	6.04678	10.1184	7.35133	10.1055	11.7944	7.93726	13.0737	18.6867	10.202
Slc25a25	7.97461	8.63292	5.7988	6.87541	9.66724	5.89962	19.3935	11.5353	11.1429	5.85537	5.63311	7.3399	7.13922	6.2987	11.2237	6.57172	8.14369	8.08028	8.35273	7.46486	19.6786	13.5553	10.9357	10.7198	6.83849	8.53123	10.9775	4.51663	11.0298	3.37791
Ufc1	9.86752	11.5595	22.2113	6.2144	8.22717	9.51974	7.7156	7.2581	5.54561	5.79031	6.60468	11.4072	7.80566	4.03306	7.99408	5.14201	5.21332	10.0099	8.01739	8.66667	21.3747	3.20246	6.7744	7.0166	8.73783	7.01507	7.37774	4.76137	9.33431	7.14033
Rbp4	9.03937	4.81065	6.0036	19.0029	7.44661	5.94166	11.1878	9.56292	8.86546	8.68797	23.926	7.37106	4.54646	4.60038	7.50553	4.8742	6.70284	4.75704	6.28286	8.71552	6.64663	8.34972	8.33832	10.974	7.03142	4.39008	7.40745	3.7913	5.02918	3.7157
RGD1309534	12.9805	10.517	13.2521	18.9445	6.90815	9.54309	7.76499	5.51362	9.82338	15.3191	4.58794	9.53719	4.69253	3.93123	10.8	5.78064	8.09988	24.7724	8.91549	9.17475	8.01016	9.51993	10.7039	12.1096	15.3105	7.81615	9.28407	9.22015	6.4954	4.39488
Hist3h2a	11.8122	13.4243	13.2521	6.33581	9.47523	5.04481	7.3661	4.80014	5.37657	8.36268	5.66746	8.10869	6.0163	2.07653	5.22707	14.5855	7.06792	4.21657	6.38693	8.54453	10.3144	11.1857	14.2482	9.16904	7.05715	5.28167	17.9343	4.00489	4.64302	5.29326
Ssu72	9.23532	15.0149	11.6779	7.32507	9.75072	7.46912	6.78487	5.4165	6.0997	13.2722	6.85984	8.27491	9.07922	6.2587	5.43027	16.9629	6.84887	7.1244	5.33465	9.30177	7.85813	8.24561	8.73127	5.97852	8.82786	14.0528	9.67524	9.91433	10.4566	20.0518
Pfdn6	2.87264	8.63678	5.43738	6.97883	6.03994	7.343	11.1004	4.88232	21.0555	8.24757	5.71653	24.1546	4.05803	4.444	4.01217	5.11729	8.43088	5.55658	7.70518	8.16347	7.46855	3.29824	6.63293	6.88101	5.1921	6.7571	5.23869	6.49682	4.27194	5.69932
Alkbh3	7.11319	5.99208	9.16001	4.60459	7.00415	8.15577	5.12094	8.13221	11.0349	7.68706	6.20231	10.2281	5.66938	6.61873	8.15405	9.20041	7.28697	9.62129	15.5877	9.72679	6.99345	10.6985	9.44643	12.8341	15.3019	10.8575	6.74395	12.2817	10.9755	23.1207
Sat1	14.2338	16.123	15.5612	6.65957	10.1264	12.5046	25.164	6.8472	5.59257	10.2144	6.34952	10.6332	7.90609	6.42235	7.12507	7.33808	5.65142	10.6174	11.1665	10.2349	7.85338	6.89633	8.58588	9.67749	8.80643	6.23662	6.13986	12.8112	15.7302	10.6871
Pabpc4	14.378	15.0149	15.4005	8.9034	11.9588	8.33794	6.40498	9.80199	10.8189	8.42273	11.2417	10.254	6.93837	11.5282	14.2545	10.3747	8.93712	9.50069	7.25034	7.30853	9.52097	11.4023	23.062	9.34276	14.2	14.9172	8.36804	12.166	19.6853	10.5829
Snx6	8.2482	11.0151	11.8787	7.23514	7.78471	5.46054	5.50463	5.38288	7.50371	7.49188	10.1327	8.18661	5.85197	8.28796	7.41474	9.32402	9.07342	5.51638	7.57027	10.9921	8.45675	7.65426	8.80986	13.6137	26.9338	10.9888	9.14047	13.4876	12.8792	23.0381
Nipsnap3b	6.11128	3.84157	6.26463	6.18742	5.54322	5.58666	10.4242	4.6171	19.9285	10.1293	8.65576	5.13741	7.22595	6.26961	5.45189	5.2409	21.71	3.92177	5.27683	6.39985	8.82258	4.18944	5.26155	8.12248	11.872	5.41292	5.83287	7.3779	4.30211	3.57915
Selk	14.1229	15.6674	15.4005	5.44547	13.3112	6.67503	10.4166	21.7818	11.8848	13.0069	8.90601	8.87229	9.92826	6.98603	8.02867	7.31336	8.69861	6.67326	7.70903	10.0639	8.54227	10.9234	9.12814	8.79194	9.7711	8.54028	5.02578	13.5499	9.08994	23.7604
Dnajc7	11.1356	11.7332	4.47359	4.02452	11.7793	5.46521	5.33368	6.78743	5.31083	5.49504	5.93243	10.6436	9.76849	6.20415	8.05461	9.09741	5.13544	9.16569	16.1042	6.21909	6.87467	4.31853	6.90407	4.99975	5.61656	9.40925	7.26385	12.1882	7.6901	23.0381
Tnfrsf12a	14.6405	10.7834	24.3517	6.05252	12.7644	11.7852	7.43448	8.68134	8.02493	8.48779	8.00314	6.90355	8.12519	7.80428	8.62531	6.91782	8.5039	7.13333	6.93813	7.36716	7.0077	22.5505	11.0261	7.30049	7.00141	6.18684	9.25931	4.99721	8.23314	4.68595
Trim35	11.8713	9.55567	9.45718	7.81071	4.96302	6.15186	5.36407	24.3593	8.76685	6.93637	4.80385	11.5423	8.68209	7.0624	6.55005	5.96193	8.75215	6.49013	7.26962	9.55581	9.3927	8.51214	8.48764	7.43607	7.76029	12.2379	11.4231	14.293	8.50768	23.7604
Clpp	6.04843	12.4243	10.5535	8.71904	6.39891	5.89962	8.7679	8.30405	7.5178	7.16157	7.63512	7.40742	5.38636	6.60782	8.31834	4.83712	6.68824	6.50799	8.31033	10.7527	8.76081	19.8269	8.05147	9.00379	5.99815	9.51787	8.59581	11.2137	11.0268	10.2523
Mrpl45	7.88588	6.0693	11.3285	7.74776	25.1574	8.16978	8.31963	11.2402	11.5514	6.85629	7.28673	8.92423	6.81969	6.61145	6.90025	7.24744	6.24041	6.8162	10.3725	9.4239	8.56127	9.99468	6.95908	7.6225	17.7415	11.9935	11.3043	10.8088	11.7569	6.83488
Surf4	8.91367	4.84926	6.70235	5.70178	7.84732	6.55825	8.35762	4.08292	5.40474	5.42998	4.95105	4.99715	14.2647	11.2446	10.1212	15.7145	6.88295	7.23607	6.63362	5.19316	11.103	13.9592	13.034	15.7238	10.8687	3.589	8.33338	7.94748	4.93566	6.18804
[truncated: 4,737 more rows]

## Sheet: local network _4weeks
1	1394
2	136	203	1143	1546	1664	1858	2196	2213	2349	2436	2458	2493	2715	2944	2988	3058	3106	4234	4237	5685	5982	6305
3	4864
4	1499
[truncated: 4,607 more rows]
[truncated: 210 more columns]

## Sheet: degree matrix _8 weeks
Symbol	GSM334860	GSM334861	GSM334862	GSM334863	GSM334864	GSM334880	GSM334881	GSM334882	GSM334883	GSM334884	GSM334900	GSM334901	GSM334902	GSM334903	GSM334904	GSM334920	GSM334921	GSM334922	GSM334923	GSM334924	GSM334940	GSM334941	GSM334942	GSM334943	GSM334944	GSM334870	GSM334871	GSM334872	GSM334873	GSM334874
[truncated: 2,888 more rows]

[truncated: 9 more sheets: local network _8 weeks, degree matrix _12 weeks, local network _12 weeks, degree matrix _16 weeks, local network _16 weeks, degree matrix _20 weeks, local network _20 weeks, degree matrix _reference, local network _reference]
