# Supplementary material for: Detecting the Critical States of Type 2 Diabetes Mellitus Based on Degree Matrix Network Entropy by Cross-Tissue Analysis
Source: Entropy (Basel). 2022 Sep 5;24(9):1249. doi: 10.3390/e24091249 (PMC9498060; doi:10.3390/e24091249)
Supplement: Supplementary file 1 [file entropy-24-01249-s001.zip › Supplementary Table S3.xlsx]

## Sheet: Name
The degree matrix and local network for GSE13269 (rat gastrocnemius muscle tissue)

## Sheet: degree matrix_4 weeks
symbol	GSM334961	GSM334962	GSM334963	GSM334964	GSM334965	GSM334981	GSM334982	GSM334983	GSM334984	GSM334985	GSM335001	GSM335002	GSM335003	GSM335004	GSM335005	GSM335021	GSM335022	GSM335023	GSM335024	GSM335025	GSM335041	GSM335042	GSM335043	GSM335044	GSM335045	GSM334951	GSM334952	GSM334953	GSM334954	GSM334955
ND2	12.0713	12.6859	15.4158	7.40346	8.61986	7.17787	17.605	9.0595	5.82056	8.14767	6.88914	8.38376	8.35059	5.676	8.61396	20.1901	5.00145	7.23564	6.18022	6.96998	6.03395	3.99943	9.83789	8.34066	5.81746	3.91679	4.06876	4.1712	8.20959	8.28203
LOC685186	11.5961	12.6859	15.4158	7.40346	8.63976	5.59347	17.605	8.08009	7.3693	6.17357	7.89104	8.26468	6.71098	6.05603	5.87822	19.136	5.47428	5.15181	6.34619	5.50054	3.35268	5.00459	5.61735	6.49725	4.71875	5.282	5.05902	3.92456	6.26608	5.11281
COX2	5.40733	11.6526	8.67741	7.40346	8.09057	6.23128	17.385	6.42735	5.52825	6.30688	6.21693	4.98262	6.3964	5.4324	8.61396	19.136	5.33162	4.50997	5.07521	6.81207	4.38833	7.56202	8.69895	8.53925	4.4386	5.66583	6.77436	4.81592	5.83053	6.18751
Aldoa	8.48208	9.22407	11.9762	4.50392	8.58802	5.5631	17.605	7.98827	5.518	5.83002	7.48429	4.70634	8.24573	6.88428	4.54182	17.8843	6.09794	4.77099	6.00552	5.38649	6.60004	4.40658	5.20476	7.68878	5.0558	5.05956	5.05902	5.29188	6.47974	5.90855
Myh4	13.0962	5.78484	13.1227	6.86139	12.8104	6.6413	17.385	7.6567	7.3334	6.29663	6.84204	5.24462	5.9436	6.91352	5.0357	19.9309	6.155	5.75941	5.88759	6.69802	8.24566	6.60776	6.10732	8.19388	4.89384	4.38349	4.27593	4.40053	5.9086	4.74239
COX1	8.48208	13.0253	15.4158	7.40346	11.9787	7.16268	17.605	6.54977	5.93339	7.75798	6.84204	6.37357	8.35059	7.25943	9.57268	19.136	5.3683	4.41156	7.51236	5.63652	4.38833	8.75379	8.96112	8.54357	4.63558	4.47509	5.12531	7.927	8.25479	10.0473
Tnni2	5.48194	9.54838	7.72398	7.40346	5.10585	6.01868	17.605	6.43245	5.04107	5.93257	5.93862	5.25414	4.9522	7.89768	6.67715	19.136	5.11558	6.39697	5.93563	5.95234	3.35268	6.93857	5.5314	7.00236	5.28342	5.46519	6.46776	4.86784	7.55216	6.96495
Actn3	15.1421	7.42149	8.80614	12.6314	12.4284	6.87921	17.605	5.64688	5.72313	7.37341	6.6879	8.47903	8.35059	8.09256	7.72303	16.4042	5.18895	5.42138	5.85702	6.98314	5.34937	5.91644	6.08153	6.9635	4.45611	4.82402	4.856	3.82504	2.7694	5.41922
Myl1	12.083	7.71186	11.2802	12.3585	4.92677	8.69645	17.605	8.15151	6.3539	7.61953	7.89104	7.03093	4.98557	5.72472	8.61396	19.136	5.41314	4.60839	5.83955	6.43045	4.38833	4.69923	4.95548	8.22842	4.45611	4.68881	3.71658	4.38322	5.9086	4.77897
CYTB	12.0713	12.6859	15.4158	7.40346	8.61986	7.55245	17.605	7.33534	7.64109	7.64004	6.88914	8.38376	8.35059	5.47137	7.30661	15.4028	5.18895	5.4385	7.2765	6.4173	5.34937	5.63228	6.94541	6.32889	5.85248	3.80339	4.01075	5.04092	5.97434	2.92683
ND1	12.0713	12.6859	11.4814	7.40346	5.10585	7.55245	17.605	8.26373	7.3693	8.13742	5.93862	6.76894	8.10751	5.98782	9.84383	19.9309	4.96884	5.89634	6.74365	6.5138	4.38833	5.76376	6.87234	7.80534	5.68614	6.62104	4.58668	4.82024	7.09197	8.68904
ND3	8.94938	8.25113	3.77751	8.99693	11.9667	5.87694	17.385	6.13659	6.53339	6.31201	6.09276	7.9741	6.73481	8.95493	9.05943	19.9309	5.69032	6.20014	4.86556	7.47442	4.38833	8.90223	5.10161	8.30181	5.35784	7.46284	8.70516	7.77556	7.88909	8.45123
Mybpc2	7.07233	8.25113	11.1515	12.3585	3.91595	7.92704	17.5825	4.81031	6.19493	7.80925	6.04138	5.09218	6.48219	8.14616	4.08183	15.517	4.95254	5.02772	5.35037	6.45239	10.4574	8.24485	10.2634	7.99529	6.52658	5.63094	3.93203	7.12219	5.60865	5.16769
Atp2a1	7.89698	12.6859	11.2802	7.40346	3.7289	7.40059	17.605	5.79991	6.44621	7.61953	6.88914	5.91627	4.98557	7.55663	8.70112	15.4028	6.29359	5.4385	5.59059	5.85584	6.35868	5.71711	6.89813	4.00628	4.45611	4.68881	3.71658	4.00245	8.02058	8.11282
Tpm1	11.0346	12.6859	11.9762	7.41801	5.02228	6.02374	17.605	7.34554	6.49237	5.40956	7.89104	5.38276	6.99219	6.14372	6.6142	19.136	5.18895	5.9648	7.32018	4.75924	3.35268	4.86039	6.08153	7.00236	4.71875	5.38232	4.11434	5.46496	6.71395	6.96495
Tnnt3	4.05648	13.0253	8.02972	7.82548	11.919	7.55245	17.605	6.12128	5.89749	7.99385	6.6879	8.47903	8.31722	6.31912	6.87567	19.136	5.352	7.16718	5.83518	5.61897	6.54738	6.62048	5.80646	3.93721	4.22849	4.82839	5.05902	4.85053	5.47306	5.91769
Ttn	5.21884	19.8057	4.71485	9.62632	6.00923	6.93995	5.9566	7.73322	9.55393	7.61953	5.75023	5.44468	4.98557	5.17905	6.27526	20.1989	7.61427	8.86162	6.86594	4.72415	7.77172	6.00551	4.64173	7.75353	6.13262	6.43349	4.98444	7.90104	5.76479	5.89025
Eno3	15.1421	11.1398	7.73203	7.28704	13.1964	7.67394	17.4074	6.97316	6.318	8.45532	7.86107	9.15545	6.51556	9.47137	8.38154	19.9309	4.81802	6.59808	7.35075	6.27693	3.38779	9.70382	8.27346	6.1562	4.92011	6.62104	5.14189	4.82457	7.13716	9.16008
LOC100912619	15.1421	12.569	8.38374	7.41801	11.9986	5.59347	17.605	8.98298	6.00005	6.37867	7.64699	7.80738	8.2076	6.37758	5.71359	19.9309	6.06125	4.65118	6.01862	8.58417	7.3285	5.78073	4.72339	8.21115	4.39921	4.16105	5.0383	4.15389	7.09197	6.2241
Tpi1	4.91254	7.48183	8.16248	4.8168	9.22078	7.32466	17.8339	7.01397	6.39493	7.2401	5.50189	5.21604	4.98557	5.71498	7.02578	15.517	5.0952	6.90616	5.84391	7.28142	8.03502	10.5775	9.78632	7.90895	4.55679	7.5588	7.6569	7.76691	3.08579	4.90702
Ckm	4.91647	8.13045	7.93719	4.78405	3.8085	5.40618	17.6678	7.56999	7.60007	6.24535	5.28353	4.66823	5.45267	6.89403	6.10579	16.9707	4.82617	6.28144	5.84828	5.31192	4.97197	5.28875	4.75348	7.23116	6.04946	3.92988	3.84916	3.82937	8.73553	3.69513
Pvalb	7.07233	9.2203	13.0624	18.0557	10.0804	9.20771	9.41744	7.95257	8.10264	8.4143	6.67506	8.59336	8.78909	8.97929	6.42052	9.87763	6.31805	20.7784	5.35037	8.6719	7.22318	10.9719	9.52415	8.36225	10.1816	9.86177	10.0766	9.92174	6.81256	5.6616
Car3	12.083	7.71186	12.6158	14.5086	8.39302	7.70937	17.6454	6.96806	5.75903	7.94257	6.65793	7.45488	5.10473	10.0755	9.92615	16.4042	5.36423	6.11884	5.02716	8.93509	7.01254	8.21516	8.94393	7.99961	4.89384	8.38316	6.23573	4.64716	2.53519	5.55184
Gapdh	8.0462	11.0417	8.91878	3.9473	7.9473	7.16268	17.385	7.6363	5.89749	7.99385	5.53186	7.1262	6.3964	6.65042	6.58999	19.9309	5.88598	7.05165	8.04521	6.21991	3.84417	5.53898	5.66463	7.84851	4.96388	4.83275	5.36977	3.98514	5.57167	5.84452
Mb	11.6432	11.0417	7.73203	4.45299	11.9667	8.55472	17.6678	6.1876	5.65646	7.9477	5.37344	5.59712	5.8578	6.55298	6.17842	15.517	4.95254	8.7846	4.93544	7.3516	5.32304	8.67321	10.0786	6.60087	4.33355	5.52626	6.5009	4.22312	2.53519	5.218
Cox7a2l2	3.32215	8.47739	4.9884	9.44805	11.919	8.26619	16.8015	7.13129	8.2411	8.0964	5.67744	5.43516	2.76923	5.52984	9.04006	16.4042	4.97292	7.03453	5.76966	7.38669	8.1579	8.30423	6.11591	6.26845	4.37732	5.32126	6.46776	4.48707	2.53519	5.34147
Atp5c1	12.6799	7.42149	10.8055	14.5086	12.2135	8.31681	17.9281	7.35064	5.75903	7.50673	7.17601	6.73559	4.9808	9.03775	6.14937	19.3512	5.29901	6.23009	9.27689	7.79901	7.39433	4.78829	5.83225	8.37952	6.89866	6.72572	8.41927	5.26592	5.16078	6.24696
LOC100363502	5.10888	12.3013	6.93549	12.6859	8.52037	5.80101	17.385	6.79972	6.1898	5.90181	5.69029	6.51647	6.65855	6.59196	7.72787	19.3336	5.65771	7.6293	7.8574	5.25929	7.16614	5.54746	5.38957	9.08321	7.71721	6.03221	4.71098	6.62891	6.43865	6.33843
Slc25a4	3.5774	8.32655	7.95731	4.78405	4.71585	6.16041	17.6678	9.77875	10.0565	6.20946	5.21074	5.25414	4.9522	7.92691	7.66008	19.9309	5.74739	5.60965	5.99678	10.0712	3.38779	7.02339	8.77201	8.427	4.22849	6.5338	5.61008	5.214	5.76479	7.32166
Tnnc2	12.0713	9.26178	8.43603	4.78405	8.63976	7.47652	17.605	8.47287	6.4616	8.06563	5.60893	7.70735	6.28201	5.97807	6.36242	15.517	6.67268	4.93786	9.52147	6.43045	4.87543	5.51353	5.20476	7.99961	5.65987	5.3736	5.05902	4.40485	2.53519	5.20428
Fhl1	12.9116	7.92304	12.0124	8.27296	15.5165	7.33985	15.9755	5.84072	5.25133	7.49647	5.02235	7.17383	6.66808	6.83556	8.47354	20.1989	5.85744	4.69824	5.69105	4.81187	4.96758	6.49749	7.09583	6.14325	4.51739	3.91679	4.22207	5.15775	5.27583	6.24239
RGD1565798	15.1421	11.0417	7.93719	7.28704	13.1964	6.22115	17.4074	7.29453	6.42057	6.31201	5.3135	7.45012	8.31246	8.62362	7.61166	15.4028	5.30716	8.25402	5.51197	8.72893	5.3757	7.4263	5.05433	6.82536	5.56795	5.32126	5.33248	3.85966	5.23885	2.92683
Ckmt2	5.58796	4.66483	7.41422	6.33751	7.64485	7.90679	17.605	7.73322	7.67699	7.68107	4.94956	5.53043	4.79968	8.91595	6.14937	19.9309	6.2243	7.76194	5.63427	6.03129	9.08822	5.5305	7.54711	5.9274	6.35149	5.05083	7.8392	4.75534	4.82796	5.67074
Mylpf	8.5292	11.894	12.0124	9.62632	15.5165	5.65421	17.6678	5.16228	7.57443	6.31201	3.04852	7.65019	6.43453	8.22898	5.93148	15.8947	6.67268	7.4667	7.46431	5.68915	4.73939	5.63653	5.67323	6.15189	5.24841	3.64201	4.02318	4.09764	8.73553	6.96495
Hba2	8.93367	13.0253	12.3101	7.82548	15.5165	7.83086	17.605	6.77932	7.78468	6.78887	6.31968	7.74546	6.69668	7.58587	7.8005	10.1104	6.22022	10.9412	4.35018	7.19807	7.14419	22.474	7.86516	7.04121	8.09366	7.93391	6.83651	4.85486	7.1536	4.74239
Rpl26	3.98972	19.8057	5.69241	7.82548	9.49935	6.00349	9.30073	6.23861	7.1334	6.41456	5.77592	5.3637	6.23434	6.54811	5.77653	15.517	6.08978	9.18682	6.94893	4.61887	6.34552	4.33024	8.00699	7.05848	8.9735	4.97668	4.17234	4.19716	2.75707	6.10519
Ldha	11.5961	12.6859	15.4158	7.40346	8.63976	7.17787	17.605	9.76344	9.3129	7.99385	7.89104	7.90265	5.80061	6.75761	8.58007	19.3161	6.03679	7.32122	8.11946	10.1238	8.35976	6.4169	4.75348	8.12049	5.93127	5.39104	8.37369	8.17797	5.169	8.4055
Tpm2	12.3422	14.5074	12.3101	7.41801	8.22588	8.53447	17.5825	7.92706	6.318	7.46571	6.33253	7.11667	8.10751	10.7625	7.1904	8.44145	6.42403	5.01488	7.44684	8.94386	10.5978	7.8589	10.7061	6.69153	4.81505	4.81094	5.30348	3.99379	20.0473	4.73324
LOC100365711	8.19542	10.8871	9.61072	2.42295	12.7507	7.34997	16.8015	7.07008	7.42571	8.38867	6.71788	6.51171	7.14471	7.31303	6.2801	19.3336	5.88598	11.4204	5.45519	9.4132	5.70921	9.32211	9.43389	5.60361	5.19588	5.37796	5.86283	4.96303	5.32514	5.65245
Ndufb9	9.31851	13.0253	15.4158	11.7073	7.35036	7.8258	17.8339	5.88153	5.59492	7.60415	4.67982	5.49708	8.21237	9.03775	5.04055	19.3512	9.2162	6.1488	5.85702	8.44381	8.4563	8.19396	6.88524	9.90777	4.34668	5.41285	4.69026	5.36111	5.32103	6.37501
Slc25a3	8.93367	5.18901	8.5004	4.65308	8.58802	5.39099	16.8015	6.32022	5.75903	6.37867	5.80589	6.51171	5.86257	7.09866	7.44219	4.41836	5.44983	6.15307	5.27175	6.68487	7.08715	6.90464	10.3751	7.10597	4.57868	6.5338	5.05902	5.01063	16.3493	5.35977
Pgk1	15.1421	12.6859	12.8974	7.41801	10.1242	7.76505	17.605	9.69203	7.57443	7.80413	9.04708	9.13163	8.50311	9.21802	9.92615	19.3336	6.60338	4.53992	6.3724	5.77688	9.08822	6.91312	8.44107	7.35636	6.32085	4.92434	5.28276	5.02794	5.69494	6.69056
Uqcr10	15.1421	7.66284	13.1227	6.86139	11.9986	8.86856	17.385	9.60021	5.74364	9.14754	5.91293	5.09695	5.63855	4.80389	23.324	7.81339	5.21749	7.36828	4.89177	5.77688	7.3285	5.63228	5.39386	8.28886	5.06456	3.93424	3.61299	4.98899	6.6934	4.68751
Myh7	5.58011	9.29949	10.4394	18.7833	10.3948	6.93995	5.79051	6.96296	5.61031	6.92219	8.11797	8.26468	6.52032	5.59318	8.25081	6.13125	21.0656	8.57494	5.86138	6.27693	6.92039	6.28119	6.80358	9.93799	5.47603	7.41487	6.68735	4.96303	8.83414	9.16008
Mybpc1	4.78295	5.65662	3.25051	5.39161	4.27411	7.44109	15.6927	6.72831	7.92828	5.64543	8.07087	4.82543	9.85675	5.3788	7.11777	5.23967	5.15634	6.67938	8.13693	6.63223	5.81014	5.39054	4.41824	4.61931	6.21579	6.37242	6.32274	7.65441	7.54395	25.0061
LOC689130	12.0713	11.3434	7.47054	7.82548	13.1964	7.47146	17.4074	8.01888	6.69237	6.49147	5.39913	7.11667	6.95882	8.37027	8.79311	9.53066	4.76503	4.03929	4.70833	10.2335	9.12772	8.34664	7.71473	8.0989	5.58108	4.53179	6.02856	7.1395	6.08529	21.8598
Usmg5	10.9992	13.0253	11.1475	14.5086	7.33046	7.7853	17.8339	8.30964	7.80007	7.36828	6.07135	6.07823	6.792	9.06699	6.72073	18.3718	9.04092	6.31139	4.73453	9.97466	8.69327	7.09973	8.75482	7.82261	5.63361	4.71498	4.25936	5.33515	5.8634	5.27745
Atp5b	7.5789	12.569	4.60623	7.82548	11.6285	8.15989	17.605	6.23861	5.4821	8.02461	6.02425	5.37323	5.31444	5.84165	5.72327	6.1576	6.0694	7.29554	5.59496	8.17624	8.87319	10.0898	5.83655	16.936	4.32041	4.86328	4.7607	4.80293	4.17054	4.89787
Pygm	7.51607	11.532	7.75616	9.44805	3.89605	6.01868	17.4074	6.1978	5.2821	6.12229	8.31064	6.10205	5.07136	8.84774	7.73271	14.7923	5.13596	5.16037	6.34183	6.96121	4.89737	9.22456	8.67746	6.82536	4.39045	6.5338	5.37391	5.28755	2.7694	6.73172
LOC100912819	8.93367	6.61825	4.73094	4.76586	4.73575	6.84884	17.605	5.47855	4.36414	7.07601	6.11417	6.84515	7.65471	5.33008	5.39401	13.6152	5.84929	9.1098	6.07103	5.08822	4.362	6.95129	8.9955	7.36931	6.34274	3.79903	4.25936	7.01401	9.29434	10.1707
Chchd10	4.71619	4.3556	4.52175	7.84731	9.04966	5.19358	17.8339	7.93216	5.55902	5.55826	5.83158	6.78323	5.92453	6.53836	7.45187	4.65553	6.07756	10.0726	4.76074	5.55318	6.51227	9.14822	7.49124	7.67583	4.63558	5.21658	4.12677	4.68178	18.2887	6.00001
Myoz1	4.29994	7.93436	4.60221	6.33751	7.34638	6.84884	16.8015	6.71301	6.58467	7.61953	6.01141	5.43516	2.91699	7.30816	11.0301	4.62918	5.01775	8.76749	5.86138	7.7376	4.69551	10.7896	8.02418	8.46154	3.99212	4.74115	5.76753	21.6219	6.02365	8.218
Actn2	6.52649	12.6859	14.7158	14.5086	11.6842	7.57776	17.9281	6.42735	5.70774	7.93231	6.59371	7.3215	6.20575	6.80146	4.75971	7.30831	6.60338	7.61218	6.04919	8.58417	6.50789	5.81466	5.68182	19.1119	5.5592	4.57541	7.95936	4.60822	5.78944	4.71952
Cox7b	11.5961	11.532	12.0245	4.65308	8.34924	7.16268	16.8015	6.02946	6.33339	9.17831	5.50618	6.45455	4.68529	4.78441	9.36932	20.2428	5.09928	10.402	5.16693	7.65865	13.0684	9.04219	6.11161	5.15463	4.73188	4.76296	4.20549	7.76691	7.16593	5.44666
Cox8b	10.1942	7.71186	9.11188	18.7833	9.65058	6.64636	9.30073	8.77894	7.04622	6.47096	6.83776	6.60698	4.83305	6.32399	7.2243	19.3336	8.7882	7.8518	7.01008	5.17595	9.44806	4.9537	7.28064	9.60558	7.7785	8.06476	7.74805	6.14862	6.06474	5.27745
Atp5e	4.80651	9.68414	8.38374	7.82548	11.903	7.12218	17.605	9.18702	6.27185	7.69132	7.76688	9.76518	6.01509	6.3922	5.90727	3.57949	6.46479	7.66781	4.81752	5.7374	4.82716	7.35844	7.49124	8.0989	5.32282	6.48583	4.52453	5.07553	12.1254	5.71647
Cox4i1	12.5071	7.81745	8.68143	12.6314	15.5165	8.55472	17.605	6.32532	6.68724	8.32201	6.05422	6.35928	5.79584	7.25943	5.14707	19.9309	5.20118	9.32375	5.51197	9.14125	8.1579	8.12186	5.65174	7.3909	7.16567	5.32126	6.77436	5.09284	5.21009	8.04879
Casq1	15.1421	9.80104	12.3101	7.28704	13.662	8.67114	17.4074	7.41695	6.1898	7.78874	4.76545	7.19765	8.35059	9.29597	8.38638	19.4215	6.67268	7.4068	6.74365	5.42158	11.6071	12.3249	12.5671	5.33163	5.64674	8.06039	4.59082	6.72411	8.19726	7.12044
Tcap	11.062	14.0888	10.4877	8.65496	4.74769	11.5868	5.94313	8.20762	7.42058	9.13216	7.98952	5.69239	9.92824	9.47137	7.46156	4.55891	15.9908	7.88603	8.13693	9.16756	12.476	12.3461	13.0269	8.98391	6.62726	12.5137	11.7754	23.9627	8.29587	11.8628
LOC100910017	15.1421	9.5333	12.821	21.5664	13.3158	8.6509	7.59949	7.85565	7.83597	8.33739	6.47382	7.43106	6.16762	6.28014	24.7815	9.74148	5.50689	8.12137	4.79131	8.23326	9.7728	10.1322	6.62736	6.71743	5.92689	8.20433	7.05611	8.89192	4.89781	6.66769
Cox6a2	8.3682	13.0253	15.4158	7.40346	11.9787	11.5868	17.605	6.58038	7.10776	7.99385	9.42815	6.84515	7.77863	7.32277	7.12746	15.1305	6.73382	8.44229	8.00153	8.50083	7.91654	8.30423	7.86945	6.10871	4.92011	6.49455	3.93617	6.93613	3.08579	5.53355
LOC100911417	8.5292	11.2944	8.16248	2.36474	12.1219	7.16268	16.8778	7.46796	5.75903	8.50147	6.6879	7.2691	6.70144	11.4056	8.75922	19.3336	5.17672	6.23009	5.69978	9.61936	6.43767	10.2806	7.59869	5.04239	5.05143	5.25583	5.69295	7.3645	7.28919	5.30489
LOC685596	12.6799	14.5074	8.12225	7.41801	12.1219	5.94781	17.5825	9.87567	7.70263	6.37867	6.38391	6.62127	8.66993	11.2107	11.0011	5.43731	6.80311	5.42566	8.08015	20.3046	6.39818	10.6666	10.6545	7.96507	4.51302	5.52626	5.07145	6.95776	5.30459	7.04727
LOC100361008	11.6432	14.5074	8.5004	7.82548	13.1964	7.75999	17.4074	8.54939	7.73853	8.22459	6.37963	7.99316	7.22574	11.2399	6.14937	19.9309	4.88732	6.70077	4.87866	9.82114	9.08822	7.78256	5.00276	7.99961	4.81505	4.50126	5.12531	5.51256	6.81256	6.47105
H19	15.1421	12.569	14.7842	7.41801	14.5296	9.25833	17.605	6.23351	9.34367	9.07063	6.60655	9.58893	8.07414	12.0633	10.6815	8.30529	6.3262	10.248	8.55186	7.48319	9.3603	9.63172	11.398	21.7108	9.52942	11.8987	11.4522	9.41115	7.48642	9.44361
Atp5g3	11.5961	12.6859	15.4158	7.40346	11.0594	5.67952	17.605	8.75853	7.80007	6.78887	6.38819	6.45455	4.75679	6.61145	9.99394	19.9309	6.9417	7.43247	5.12762	11.0537	5.09046	9.46631	8.56142	7.26138	4.97701	5.38232	5.20818	5.30486	4.82796	6.33385
LOC100363271	8.88262	13.0253	12.0325	7.82548	15.5165	6.67167	17.605	7.07008	8.62059	6.36841	7.7369	9.22214	9.95684	8.23873	7.42766	20.2164	5.24194	5.68239	4.76074	10.4966	10.9664	10.8956	8.96972	5.98352	4.31166	5.3736	8.70516	5.78948	7.95894	7.23477
LOC100365810	8.49386	13.0253	12.0325	18.7833	13.3158	9.14191	5.9566	6.42735	6.1539	8.12203	6.57658	7.49775	7.79293	4.16565	7.75208	18.5211	5.67402	5.50696	5.71725	7.45687	7.46454	5.4075	5.5314	6.62677	5.56795	4.03892	6.73293	7.23902	6.75093	6.59452
Adssl1	3.92296	4.47627	3.49993	4.65308	4.31789	6.10473	6.5132	9.29415	9.54367	5.50186	17.3749	4.66347	4.28492	6.02679	5.22939	5.0025	5.53543	5.10902	6.31999	6.30764	5.4503	6.06489	5.56148	7.23548	4.57868	5.24275	7.51602	10.1987	22.0114	6.29269
Pgam2	4.29994	12.3013	8.14236	12.6859	7.33046	7.58788	17.4074	5.75401	6.82057	5.55313	6.04566	5.19222	5.04753	8.51157	9.30153	8.10326	4.45117	8.4209	6.47286	9.44829	7.88582	5.80193	4.88241	4.30416	4.71875	3.90371	3.61299	5.70727	13.4608	5.08537
LOC680121	5.0971	9.05814	12.4268	11.6454	8.29751	6.48944	14.9925	9.70733	8.5129	8.34252	6.55946	7.43583	5.22865	9.41778	8.01839	2.6923	7.42676	6.58097	4.95291	6.16288	16.7897	6.47628	7.48264	5.66405	5.69489	4.57541	4.34222	7.03565	7.93018	8.60215
Atp5j2	7.81058	13.0253	11.1475	14.5086	7.33046	6.61599	17.8339	7.01397	8.42059	6.30688	5.56612	5.18745	5.14286	8.37515	7.59229	19.4786	5.04629	5.58826	4.93544	4.33376	7.78928	6.60776	7.20328	6.92465	5.36659	3.87318	4.0439	4.11495	6.96048	6.27897
Ccng1	12.1851	8.71497	6.98779	12.8678	12.4602	4.49502	21.1556	6.27942	7.11288	7.86053	7.29161	6.10681	6.425	8.55541	8.82701	18.5343	4.43486	6.39269	6.71308	9.69832	12.1293	11.7862	7.74482	7.71468	11.7837	14.3674	8.28254	10.9948	4.51568	6.25611
Pfkm	3.97401	4.54793	3.2143	4.47846	8.34526	5.24926	15.9755	7.60059	8.477	5.3788	5.02235	9.04113	9.85675	7.42509	8.11523	4.41836	7.38193	7.56939	9.52147	6.1585	9.60604	3.75768	5.60016	4.56751	9.02603	9.53464	10.5241	13.2968	22.0114	8.593
LOC689961	7.49643	11.1398	15.4158	7.18518	13.1248	6.85896	17.4074	7.6567	6.97955	6.78887	5.80161	6.06394	5.98173	8.76004	8.75922	18.9911	10.1659	6.03754	6.63883	7.05771	9.73769	8.38905	10.4611	8.28454	4.72313	6.77806	5.5355	4.14524	6.81667	4.90245
Gpi	7.26867	14.5074	14.9049	10.9069	13.3158	8.6104	17.5062	7.12619	7.51802	8.07589	5.32635	6.58792	5.915	11.2399	11.0301	8.97288	6.10609	8.14705	5.24991	8.39995	8.51335	8.27878	9.12014	4.08399	9.73516	8.13018	6.03685	5.93227	14.8989	5.09909
Atp5a1	7.5946	7.48183	15.4158	10.9397	13.1248	8.53447	17.8339	5.64178	6.46672	9.61928	5.90437	7.94552	5.98173	5.18879	6.6142	7.81339	6.3262	6.38841	5.29359	6.46555	23.0431	6.4169	8.01128	7.88305	9.38935	5.64838	5.56451	4.69909	7.99592	6.01373
Rpl27	13.1276	9.5333	12.821	21.9412	15.5165	5.69471	8.28178	5.85093	20.4463	6.15818	5.60037	8.72197	6.42976	7.76126	8.88995	2.94704	6.04087	7.96305	7.3988	5.42158	7.23196	5.4584	6.17608	5.01217	7.24009	8.21305	5.27033	4.31831	5.18954	5.32775
Rpl18a	11.5961	12.569	8.68143	18.7833	13.3158	6.80328	5.9566	6.95276	3.94875	6.09665	7.81397	7.00235	5.71005	8.35566	8.32344	18.5343	4.88732	7.20569	7.44684	5.84706	7.24513	8.83862	5.92251	4.75746	4.26351	3.82084	3.82845	4.26639	7.0632	7.2302
LOC100911847	9.85257	7.81745	8.5004	18.7833	13.3158	7.12725	9.38602	4.17777	8.02571	8.84502	7.54423	6.71654	5.5337	6.22655	6.47379	17.7393	6.96208	9.88001	6.12781	6.77259	12.5945	10.5224	7.29783	7.41248	5.23527	3.8252	6.89452	5.95391	7.95894	7.11587
Atp5h	11.0346	12.6859	7.73203	12.6314	20.4911	6.22622	5.9566	6.44775	7.67186	6.04538	5.4077	4.75874	5.10473	7.96589	10.667	19.3161	6.30174	4.69397	6.17586	5.79443	12.397	10.8574	12.6874	7.39521	6.66228	5.26892	9.0242	6.80632	7.97127	6.99239
Eef1g	15.1421	12.6859	12.0124	7.41801	8.63976	7.74987	17.605	6.99356	6.49749	7.34777	7.89104	7.03093	5.63379	10.8063	9.03522	5.49001	4.42671	8.63056	7.48178	8.89561	20.5725	6.02247	4.25062	6.11303	4.55241	6.62104	4.61983	5.17938	5.41142	7.49087
Ubb	3.38498	5.27952	3.22637	8.25113	9.71823	6.01868	3.95909	6.6977	7.94879	7.9477	7.89104	7.98363	9.80432	7.62484	5.45212	4.35248	5.37646	7.74055	7.63902	7.29896	10.1941	8.02431	7.34941	8.427	17.4655	6.49455	12.1731	6.7717	16.2302	9.08691
LOC100364457	8.45459	4.71762	4.59818	9.65542	8.24179	6.30721	17.605	5.86113	5.93851	5.91206	5.96431	4.99215	4.91884	8.25822	7.91671	17.1947	4.94846	7.09871	4.57293	3.26348	5.92863	5.2633	4.13888	4.75314	5.72116	4.27445	4.27593	5.25294	6.07707	5.34605
Ndufb5	12.4129	7.71186	15.4158	12.6859	13.1009	8.27125	17.605	8.5851	5.73338	5.7326	6.48667	7.45964	5.01893	11.2399	6.75462	7.45324	9.92953	7.90315	7.29397	21.0986	12.2698	12.3249	10.7877	9.34223	6.6973	6.72572	7.99665	5.15775	5.27583	4.67836
Rps4x	14.1132	19.8057	12.7204	7.82548	13.662	5.45174	9.30073	6.6671	5.5539	5.90181	6.01141	5.49232	5.0094	6.29476	8.75922	19.3512	8.01373	6.08889	6.44228	8.8342	7.46454	7.46447	8.83648	4.92583	5.23965	4.38349	10.6442	9.9001	4.72524	7.09757
Cox5b	11.2545	13.0253	15.1543	7.82548	15.5165	6.86402	17.605	7.56488	9.63085	7.56826	7.2959	6.60698	4.97604	7.39098	9.6792	6.8164	5.13189	21.0009	6.11034	9.39566	7.08715	12.9865	7.06575	7.04121	5.70365	4.89381	10.3252	4.12793	6.84132	5.87196
Ndufa1	11.7061	13.0253	15.4158	7.40346	11.9986	5.16827	17.605	6.2131	5.75903	6.69145	6.07135	8.46951	8.56507	10.7479	9.74699	4.07139	8.10341	6.00759	4.66028	9.82114	5.73993	6.6332	5.04573	9.5365	5.66425	8.15199	6.81994	3.78177	12.6225	6.14635
LOC100363869	11.6314	10.016	12.7808	21.5846	13.3158	8.21051	8.97754	6.65689	7.0975	7.57851	7.36868	8.87441	7.91685	9.63215	10.5556	19.9309	9.00832	6.94039	4.46374	5.8997	5.11679	6.63744	8.00269	9.92936	5.66425	11.7373	9.91502	10.428	5.00464	7.23477
LOC100360522	11.6432	7.48937	7.87283	4.31474	9.50731	5.33025	17.4074	7.6159	9.38983	5.92744	5.7802	6.00201	7.7834	6.29476	10.5169	19.3512	5.18488	8.05719	4.94855	5.45229	8.40803	6.17516	5.36378	7.76649	5.5198	3.84701	4.05633	7.80585	11.205	8.46953
Aco2	8.2661	9.27686	7.95329	9.27343	8.67159	5.80607	20.0468	6.77422	7.00519	8.13742	6.53805	8.56001	4.40884	7.32764	6.55126	6.50896	6.3262	21.0009	4.50741	7.55337	11.0015	8.24909	5.74629	7.56358	10.3042	6.76497	5.79239	4.55197	4.81563	5.06251
Gnas	15.1421	12.569	14.7842	7.41801	14.5296	8.67114	17.605	9.20743	7.51289	8.26048	10.2845	7.8836	6.78724	9.19366	7.58261	7.46642	6.33028	8.0144	5.28922	7.11473	23.0431	4.43627	9.16312	8.86735	5.83059	9.5739	11.2657	4.02841	4.51158	5.72105
LOC100365214	14.769	12.3201	14.1606	18.6014	13.1964	7.89666	5.9566	8.47287	8.21033	7.68107	6.89342	7.70735	7.26863	5.44214	8.42028	5.8282	7.4553	7.86892	7.90544	4.73731	6.93355	8.06672	9.37802	7.90032	6.31209	10.3983	7.25913	4.37024	12.7787	5.27745
Tmod4	11.6668	8.17948	8.23087	5.87547	7.95924	7.8916	5.59301	7.1466	6.28723	6.37867	9.42815	7.65495	19.866	8.11205	5.80559	5.22649	5.20118	4.96782	9.42102	6.01375	10.4749	6.66289	5.944	4.95173	5.48916	3.94296	7.1887	9.43712	21.1115	12.6586
Atp5o	10.8579	7.81745	15.3876	14.5086	13.1248	7.41072	17.8339	8.99318	6.73852	6.84527	5.49333	5.22556	4.89977	9.06211	10.9478	6.02145	6.20799	6.70505	5.37658	19.6335	12.0942	12.8465	12.5714	8.0989	4.85007	7.1837	4.32565	4.50437	4.99232	6.09147
LOC691675	12.6799	11.4415	4.05107	7.6363	7.48169	5.86682	17.5062	8.01888	5.93339	6.59915	7.15888	6.75465	6.67285	8.67722	5.83464	3.518	5.98788	5.75941	5.24991	5.44352	10.4574	12.3885	11.1445	7.56358	6.05821	4.16541	7.11826	8.33807	11.2913	8.67532
Hfe2	7.64958	4.52907	5.59989	3.85999	4.50095	6.99057	4.06234	7.55978	8.55905	7.14267	8.78162	8.82201	9.55647	7.12302	5.82011	4.24268	6.90909	7.58223	18.2655	5.14963	10.8874	13.5972	14.8836	6.44113	10.9258	4.57541	9.98131	9.29	21.1115	8.593
LOC100912024	9.85257	7.81745	11.7308	18.7833	13.3158	5.68965	9.38602	10.9418	7.87699	6.07614	6.16126	6.05918	7.22574	8.25822	4.60961	6.96134	7.814	6.83342	4.82625	5.86461	6.77996	6.81557	6.47693	7.96507	4.71875	7.06157	4.97615	4.33562	13.5635	5.27288
Rps3a	8.3682	10.016	12.0124	21.9412	15.5165	6.48944	5.96109	6.72321	5.718	6.32227	4.90675	6.71178	5.56706	8.91595	8.45901	18.3718	5.60472	5.05339	6.76549	4.27673	5.75748	8.06672	6.87234	5.4482	5.72116	5.55243	5.32419	6.45151	4.73346	5.34605
Pgm1	3.22005	5.70188	4.98438	4.92958	4.93473	5.57322	16.0608	7.6414	7.85135	6.07102	5.02235	9.49842	8.26003	5.5542	4.51761	2.38925	7.22296	4.82661	7.19789	6.3515	6.19632	10.5393	9.80781	7.36499	7.72597	8.26539	8.99105	11.791	14.9564	9.40703
Hspb6	7.26867	14.5074	14.7158	13.5663	13.3158	6.98045	17.5062	5.36632	6.37442	7.47596	7.1075	9.67467	9.24189	5.24238	16.2305	8.10326	6.14685	8.96004	5.28485	7.59724	8.69766	10.4884	4.59445	6.9117	5.06894	7.10082	10.3376	5.12313	6.10172	3.31098
Cmya5	4.56697	7.49314	11.409	9.53537	5.73861	6.35783	7.71619	6.87114	7.80007	7.01448	9.04708	21.0118	8.54601	10.3142	10.3135	5.41096	6.60338	9.46067	5.6168	7.99201	4.23912	4.449	8.92244	9.17386	7.76974	6.13253	9.67885	23.0108	8.00825	6.4116
Myom2	7.5946	19.274	13.1227	10.9397	13.1248	5.45174	5.86233	6.52427	5.43595	6.20433	6.48667	7.33103	6.63948	5.41291	8.17334	16.4042	4.95254	5.22027	5.13635	5.56633	3.38779	8.52053	8.74193	8.03415	5.29218	3.89499	5.61423	7.59383	5.03341	5.67074
Pde4dip	7.66529	4.7214	12.5434	5.03508	8.10649	5.42136	4.06234	8.31474	8.27187	5.35316	18.3596	8.56478	9.68039	5.09135	9.7131	4.3437	4.9933	9.38365	8.13693	8.94825	11.0674	6.04792	9.12014	5.57339	9.56444	8.39624	9.0242	10.1208	20.3432	8.31861
Rtn4	15.3149	10.2724	13.3038	10.4012	8.47261	6.98045	10.5396	5.88153	6.60006	10.291	9.11559	6.14492	9.01787	9.88063	11.3933	18.9911	9.80317	7.82613	9.39044	5.72863	8.12279	9.1355	4.79646	8.85008	8.27313	13.6128	9.20236	12.7472	5.32103	5.60214
Ndufa4	5.05783	9.78219	8.39581	7.82548	12.0224	11.4907	17.605	9.0646	10.2257	7.78874	8.11797	9.49842	6.59658	11.2838	6.26558	19.3512	4.96476	10.2095	6.34619	10.7028	9.3603	12.9865	10.8264	7.42112	4.87196	6.53817	7.12655	5.1188	8.77251	6.55794
Ampd1	7.90876	11.9317	15.4158	7.96372	13.3158	6.06929	17.5062	8.14131	8.43084	6.42482	6.83348	4.66823	4.39455	8.78928	8.19755	20.1901	4.67536	4.83517	5.68668	9.36057	12.7261	10.1491	8.17461	8.61696	13.8017	5.89264	5.15846	6.17891	7.03855	5.23629
Sh3bgr	8.70591	14.5074	12.7808	11.7073	7.35036	10.4023	17.4074	6.02946	10.2052	10.6602	5.66888	5.91627	4.99033	11.4056	10.5169	19.9309	6.25691	5.13897	7.425	10.5975	6.13927	10.2806	8.10154	6.12598	7.51148	6.60795	8.82117	5.48227	4.41296	5.10367
Myoz2	4.39812	6.47872	7.22514	4.88956	8.04281	5.27457	14.9925	5.34592	6.25647	6.18895	7.09038	4.49675	8.15994	8.28258	5.13254	4.69067	7.2841	10.7272	8.02774	14.2689	10.1985	3.43111	4.00134	7.45997	10.0941	8.79752	6.48847	7.74095	6.85776	8.52898
LOC100910768	8.27396	5.18147	11.9762	7.71633	9.65058	7.56257	6.36059	3.49423	5.90774	6.84015	5.02235	19.4732	5.15716	4.62363	5.15675	14.8099	5.36015	10.094	4.24972	8.72015	7.43821	4.6144	6.61877	5.81083	4.15408	5.87083	4.19306	5.35679	7.72885	6.76373
Trdn	7.40219	12.6784	12.8974	8.03285	11.907	8.68633	21.4698	7.70261	6.52313	7.15806	7.13748	5.20174	6.97789	8.07308	3.90267	18.5343	7.814	6.71361	6.90088	5.62336	7.07837	6.60776	6.12451	6.6095	5.92689	4.15669	8.02565	5.23996	7.09197	7.16617
LOC683062	11.2702	3.48825	8.39983	3.84907	8.07863	7.04625	4.59201	5.96315	6.6616	7.24522	17.3749	5.89245	6.99219	4.73569	5.11318	7.60257	4.27182	7.45386	6.11034	10.4966	9.2462	8.43146	10.633	6.49725	4.09717	4.36605	4.26764	6.63324	21.3334	9.53965
Mdh1	12.1655	4.71762	8.43603	6.28658	11.135	7.61826	6.72867	7.91176	9.19495	7.88104	6.72216	5.70668	5.83397	6.19732	7.74724	5.43731	11.3195	9.47779	7.25466	20.3046	9.18038	8.35936	11.398	5.54749	5.50229	4.28754	8.87089	4.15389	9.93122	7.48172
Cfl2	6.48722	7.71186	8.95499	9.66634	7.60108	8.09408	17.605	6.83033	6.29749	8.38354	9.59085	4.69681	6.44883	7.12789	10.0327	19.9793	5.18488	5.98192	5.59933	11.3037	11.1463	10.5987	12.7089	7.13619	5.02516	4.28754	5.45678	9.53231	8.31642	8.38721
Tmsb4x	11.6314	8.97518	14.7158	21.5846	14.9037	10.5998	8.52866	8.51878	8.98469	11.4139	8.59323	8.08366	7.94545	11.0792	10.9866	20.1989	7.46753	7.74911	6.45975	8.39995	6.13927	12.2909	10.8264	8.01256	7.7391	12.1865	12.8319	7.83614	10.3544	10.3034
Ndrg2	10.8186	8.65463	11.594	9.71363	14.1913	8.251	5.5571	8.35555	7.72315	5.91719	6.85917	7.65495	20.2759	7.35688	4.7016	5.09913	5.20526	11.6044	9.52147	5.56195	11.5896	8.74107	9.0084	6.3073	7.94046	13.796	4.03561	12.7472	16.789	7.14331
Eif4a2	8.30145	5.40773	10.0251	5.257	12.9935	6.82859	6.18552	6.36103	5.54877	7.29137	6.1998	21.8597	5.22865	8.35079	7.96029	5.29677	7.38193	4.67257	7.11927	5.48738	6.99499	6.9216	6.11161	5.30141	5.97066	11.0481	11.7381	12.6477	16.978	5.58385
Ndufv2	12.0713	4.50644	12.5193	2.36474	9.47548	8.21051	16.8778	7.87605	10.2052	7.54775	5.45051	5.34465	6.67285	6.97685	6.13484	10.207	6.91317	18.6347	6.57768	6.01813	10.1546	4.81374	8.01558	8.97959	9.98029	4.71934	7.59475	5.1664	6.82489	5.22257
Uqcrfs1	7.43753	9.76333	5.62	9.13518	9.26058	5.99337	17.8788	6.41204	7.3334	6.77349	4.95813	5.51614	4.81875	11.2107	10.0327	9.77223	3.28539	18.4678	6.58205	5.17595	10.5144	12.8508	12.0556	6.76492	9.54256	4.44456	5.52722	6.72411	10.1326	8.41008
Mlf1	7.842	21.9552	12.4187	8.80048	7.35036	5.76558	9.18402	6.76402	5.96416	7.15806	7.48429	5.79242	6.32014	4.64799	8.3186	6.02145	6.64822	5.2545	5.3591	19.6335	5.69605	9.16519	10.4998	4.26962	6.91616	11.8987	5.62666	4.96736	4.54034	5.46952
Ybx3	12.2166	7.88156	6.89526	11.9983	8.54822	6.96526	3.88279	6.83033	6.1539	6.54788	17.3749	9.71278	9.0989	9.49086	9.71794	7.28635	7.35339	10.4534	7.8443	4.91276	6.2007	12.5539	12.7304	4.24372	11.5736	8.3439	11.4605	10.891	22.0114	7.2119
Rps11	8.49386	7.81745	9.55038	18.7833	13.3158	9.05585	9.30073	6.99356	3.05131	6.89655	6.45242	7.52633	9.76142	7.47381	8.90448	18.5343	5.23379	7.49237	5.97494	7.44371	7.2188	7.55778	8.40669	5.36617	7.81789	3.7685	7.07683	9.89145	5.72781	7.4177
Cyc1	10.3906	13.4665	12.7808	7.18518	15.5165	8.46867	17.385	7.37614	5.58466	8.45532	6.96193	10.132	8.32199	11.2594	6.13484	19.3512	5.0096	8.25402	7.39443	8.72015	6.85456	10.463	10.7619	8.66445	5.54169	5.08573	7.25085	6.12699	11.205	7.40855
Calm2	7.31972	7.45543	6.83894	5.4571	8.15822	8.02828	5.09026	6.10598	7.7334	5.80438	8.6232	8.66481	21.0671	8.5408	7.1904	5.31873	7.91998	4.72392	9.42102	5.20226	4.07237	8.87255	8.63018	4.56319	6.92054	5.22966	9.98131	9.80924	8.29587	24.5854
Synpo2	10.6811	6.21852	10.194	7.52352	7.56924	6.26165	5.48079	7.23842	8.92828	5.7326	5.23643	9.9843	23.2215	7.29841	4.85171	4.70384	8.03004	6.17875	8.34658	5.14963	6.59126	6.81133	7.68035	6.7347	7.00371	12.8234	14.1454	13.2968	22.0114	8.31861
Ndufb11	13.1276	14.5074	14.5911	10.5431	7.48169	10.0733	17.5062	6.83033	7.72827	8.1528	7.06041	8.67434	9.65179	21.9586	7.91187	6.85593	9.49338	10.3849	8.80081	7.92183	4.41904	6.78589	5.28212	10.5467	4.13219	10.2543	8.65544	7.29959	4.67593	4.59604
LOC100362027	7.79488	9.34097	6.99181	7.82548	7.54138	5.22395	17.605	10.1766	8.68726	7.40418	4.92387	5.61617	7.05415	4.95493	22.9996	5.76671	6.02864	7.3041	5.00533	5.57949	9.75086	6.59503	6.45115	7.02394	4.46487	6.42912	11.3362	3.6909	5.75657	5.31861
LOC688869	4.1625	7.81745	8.85844	18.7833	7.61699	6.78809	8.69924	6.88134	6.98468	7.58877	9.2055	7.73116	5.66715	10.2607	9.53394	18.9911	9.70126	8.63056	5.83518	4.90838	10.1151	8.66049	9.02989	10.4301	4.29415	8.19997	9.41782	4.95005	7.06731	8.16312
Rps24	11.6432	12.569	8.5004	7.82548	15.5165	6.25153	17.605	6.46815	5.38466	6.17869	5.71597	5.98772	6.8921	11.2399	6.72073	18.3718	7.54497	4.89935	5.1713	10.1984	10.3433	12.855	8.70325	7.27434	4.51302	4.89381	6.39318	5.07121	4.7992	6.38416
Uqcrc2	9.86435	11.6376	6.27573	9.60813	10.6694	8.29656	4.66383	7.89135	6.12826	7.97846	8.19076	8.88393	6.95406	11.0548	11.127	20.3131	13.5329	7.8518	10.1417	10.3519	10.1414	6.47628	10.719	7.8701	10.6807	9.06794	11.2947	8.08278	9.03959	9.26069
Sdhd	7.42575	14.5074	11.9762	7.82548	13.1248	6.08954	17.4074	7.21801	7.67699	8.14767	6.85061	4.92546	5.96266	10.017	11.0011	20.5634	6.58708	9.51202	6.48159	9.93518	12.0372	8.07096	6.98409	5.75039	12.4929	3.97786	5.43606	4.1236	10.2024	7.78355
Ankrd23	4.50414	6.21852	4.16773	3.32155	4.67207	5.7099	16.3391	6.23351	5.4462	6.50173	8.78162	9.83663	9.34675	4.43361	4.54182	4.62479	6.32213	4.97637	4.64281	7.66303	3.46678	8.2194	4.80935	4.50707	8.50951	5.15115	4.25107	8.52413	22.0114	6.00001
Atp2a2	3.62452	6.15064	3.62866	4.1765	3.41053	7.84098	6.5132	8.15151	5.83595	8.83476	7.83966	4.82543	21.825	8.68209	5.29233	4.26904	5.67809	4.28747	7.63902	4.68906	5.8628	4.06729	4.31079	4.17897	7.37578	5.98859	4.57839	4.80726	21.3334	5.11739
Agl	12.3618	3.83142	11.9199	8.80048	3.67319	9.56205	10.4992	6.61098	5.25646	10.7832	7.67696	7.38343	5.0094	5.66138	7.12262	2.37169	7.61834	5.98192	5.44209	6.71118	6.38063	4.8816	7.34081	19.1896	8.17683	10.2587	9.34738	10.2073	14.9564	11.2409
Rps27a	13.3946	22.4002	12.7204	9.63359	15.5165	7.82073	8.28178	7.68731	7.83597	8.2451	7.35584	7.51204	5.32874	9.13519	21.5954	9.53066	7.42676	7.77906	6.6825	9.61936	5.09046	9.2797	6.62736	7.34341	5.45414	6.7737	8.16238	5.47794	4.07603	8.04879
Sar1b	7.72027	4.75156	8.20673	5.1042	6.12464	6.83871	15.9755	6.27942	5.89749	5.31727	5.02235	9.04113	10.2381	8.09256	8.10071	4.44911	9.99067	5.58826	9.03667	5.8997	4.56825	6.74347	6.08153	10.197	4.2066	10.3852	7.76048	12.3448	22.0114	8.04879
Mpc1	6.72284	10.7363	8.95499	11.3871	3.62941	8.36236	21.573	8.04438	8.83085	10.655	8.05374	6.97853	5.17145	9.70523	9.73731	9.53066	6.40772	18.0912	9.66561	5.43913	10.2731	10.2806	8.62588	4.30848	9.49003	7.6722	9.30595	6.55103	8.0288	6.40702
Rps8	11.7218	9.5333	7.26939	21.9412	11.9588	7.85111	5.9566	9.79405	7.13852	5.93257	7.83966	6.70225	5.66715	6.19732	7.19525	6.56606	4.86694	21.0009	4.78694	7.60162	5.20455	8.70714	5.49272	5.8022	7.2182	7.25348	5.36563	5.67698	4.35544	8.38264
LOC100364335	14.769	11.0304	14.7842	7.88732	15.5165	10.7617	5.41346	10.8092	10.3129	10.814	8.47334	5.81624	24.1223	9.61266	9.66468	9.84689	7.48791	7.69776	9.52147	10.9835	5.70921	10.5987	10.7877	6.36774	8.47011	13.8614	10.7975	8.44624	9.38063	22.9391
Tuba4a	7.03306	21.0238	13.0624	4.68947	6.50668	10.0632	9.09874	6.82013	5.7539	7.89642	5.03948	7.05951	5.18575	8.38489	5.58285	6.2103	3.81121	4.13343	19.1696	7.10157	7.16614	8.21516	5.04573	8.86735	8.54453	5.36051	7.85163	4.00245	7.05909	6.5808
Rpl19	11.6432	12.569	10.2182	18.7833	9.30833	6.7476	5.9566	3.44322	5.89749	7.78362	7.82682	8.0265	6.792	5.75395	6.99672	5.20893	8.3439	10.0683	4.80005	6.95244	6.08222	12.2104	11.1058	8.39678	8.80279	7.27529	7.32128	3.95918	14.6482	5.0122
Rpl24	13.0255	7.81745	7.03606	18.7833	12.9178	8.84325	9.38602	7.87605	8.11289	6.28124	7.24023	5.55424	6.37257	9.33495	9.75668	7.5894	6.32213	8.5835	4.26719	6.33834	20.3179	10.9762	13.3407	4.33438	11.5342	10.9217	4.12262	4.69476	5.21831	6.28812
Atp5l	5.37591	10.016	12.7808	21.5846	9.25262	8.08396	7.82841	7.39145	6.64108	8.95782	5.71597	4.95881	4.66623	7.34226	8.93353	5.6086	5.26232	10.509	6.43355	18.0807	12.0942	12.4309	13.8607	6.1303	6.76734	7.1837	8.21625	5.85871	8.59582	6.83233
LOC100910393	8.72948	13.0253	13.0624	21.9412	9.98885	5.76052	8.97754	8.34535	8.88213	8.9168	9.52662	7.0214	5.64332	8.08282	22.9076	5.41535	7.16181	6.60664	4.93544	6.95244	4.47609	7.41782	6.16749	8.97959	8.31691	5.45647	3.86159	4.64716	5.01286	4.89787
LOC100912121	4.39812	4.49136	7.54697	3.33974	8.02689	9.92651	9.21993	8.17191	20.7233	10.3935	7.15032	6.62603	7.58798	8.86723	5.98958	6.60998	4.8384	4.55704	16.0817	5.09699	4.54631	4.86039	3.77356	4.58909	7.00371	4.20903	4.36708	6.2092	4.23217	6.32471
Pdlim5	10.2924	12.5351	4.8999	8.3821	8.17414	8.37249	7.85984	8.28924	6.21544	6.28637	6.90627	10.1558	24.2272	5.92448	7.86345	8.19549	8.38059	4.79238	11.7009	2.99591	8.47386	4.81798	7.86086	5.42229	8.6277	10.2761	3.74144	12.1328	16.1562	6.24696
Nrap	12.4404	9.17127	13.8388	11.9074	11.8593	11.6476	6.52218	11.2019	9.8565	11.6088	7.67696	9.77471	9.98067	7.57612	6.55126	8.43266	7.45937	9.48207	5.65174	8.41311	10.9313	8.60959	8.53993	7.20526	21.8647	10.9042	21.736	13.2622	6.54137	10.468
Atp5j	11.7061	13.0253	15.2106	18.7833	13.3158	11.2325	5.9566	10.7122	8.9129	9.4552	4.94956	6.44026	7.36873	6.79658	24.7815	8.27016	8.80858	9.25956	4.73453	9.14125	7.35044	7.4263	7.68894	7.89168	5.18275	10.4288	5.81311	3.99379	4.69237	4.98476
LOC100910710	8.30145	9.6502	8.26707	18.7833	11.9787	7.13231	4.4753	8.91667	9.54367	7.01961	4.92387	5.39228	4.80921	8.42874	4.57087	7.28635	4.52046	7.92454	4.96602	20.3046	5.81453	9.32211	9.44678	6.04828	4.28102	5.43466	5.05902	5.87602	5.03751	4.87044
Klhl31	13.8816	13.5533	7.36192	10.5176	12.5119	6.66154	3.79301	6.74871	6.96416	7.00936	5.56612	5.81147	5.96266	7.01583	8.56554	19.4917	4.77726	9.85433	6.06666	8.8342	7.69712	8.7241	4.28071	7.85715	7.3539	12.2389	5.36148	8.52413	6.58246	5.94513
Abra	9.47166	12.9235	20.5007	11.7255	9.59486	7.10194	7.32118	7.48327	6.5898	7.94257	7.23167	9.40792	10.1475	7.88794	7.35019	6.55727	5.38868	9.10552	9.9495	7.92622	7.19685	7.92252	5.35088	8.073	19.3478	7.09646	12.0737	12.0376	11.657	11.4467
Sdhb	4.44524	4.58187	3.50395	5.24973	4.24626	5.83644	17.385	5.60097	5.49236	6.63505	5.60037	5.6257	6.84443	9.42265	6.67715	15.8596	7.8303	5.73374	5.21497	3.57491	7.76734	5.54322	5.38097	6.52316	5.18712	3.81211	5.45264	5.91929	4.6143	5.35519
Rps5	11.6864	3.85028	12.821	17.1498	8.09455	5.36062	6.74662	6.63649	5.77954	6.22997	6.1056	4.7111	5.96743	5.87576	6.97736	5.31873	7.48383	6.64515	6.0623	17.6201	2.77781	5.07245	6.97979	7.36068	9.49003	8.21742	5.86697	4.89813	5.01697	4.52745
Mef2c	12.8527	13.3836	10.0894	13.5845	22.1466	11.5565	5.32817	9.78895	9.09239	9.33726	8.80303	23.3126	6.28201	7.18635	7.12262	5.58225	7.09252	7.45386	9.04977	7.28142	7.58741	7.75287	10.676	8.97959	9.61697	13.9836	12.5792	6.97507	8.263	11.3506
LOC100910336	7.20192	6.73892	7.26939	21.9412	7.9871	27.9927	5.70971	8.98808	8.53854	11.255	7.68981	9.2269	5.60519	8.04384	8.84638	4.94101	5.20118	7.03881	5.13635	6.88225	4.74378	7.08701	8.37231	5.43525	11.3022	6.87838	5.13774	5.79814	6.51261	6.96952
Ppp1r3c	13.4457	9.1411	8.26305	20.7843	11.8036	10.782	7.52318	10.5082	12.8309	14.0238	4.8939	8.55525	8.73189	8.92082	7.21461	8.59956	7.35339	9.23389	8.62611	7.20246	10.3872	7.91828	8.12303	7.77944	17.9032	11.0351	12.7905	13.4742	7.43301	11.6662
Acadm	21.1816	7.82877	14.2934	10.4012	9.76599	9.35451	5.7546	6.00396	8.55392	8.57839	8.59751	5.78289	10.2381	9.69549	10.5072	4.8927	20.4827	8.20267	8.47761	8.40433	9.29886	7.03187	7.01847	10.3136	9.44188	7.4454	3.74144	11.6871	9.76275	8.89941
Hadhb	21.4565	9.5333	8.60902	14.5086	11.7956	9.37476	6.00597	8.19232	7.24622	7.30675	4.71836	8.40758	9.5231	11.1717	8.84153	4.43154	9.62382	10.7058	9.0585	8.97895	10.9884	4.49989	7.10013	20.1177	9.79644	7.5021	6.05342	6.49911	9.91889	10.6921
LOC690468	9.85257	10.016	13.0624	21.9412	15.5165	5.50235	6.23041	7.78933	20.0412	6.50686	8.06231	8.21228	6.94929	5.90012	6.18811	5.64813	5.13189	8.41662	6.31562	6.59714	6.76241	7.05732	6.20617	6.04828	5.44976	3.9953	4.03561	3.81639	5.49771	7.89331
Uqcrq	7.60639	11.6376	12.4308	7.18518	13.1248	6.35276	17.4074	7.06498	6.11287	7.80925	5.8273	6.34499	7.7262	9.35931	9.27247	9.05194	8.64146	4.9507	9.80974	17.1815	8.96974	6.1794	6.63166	8.59537	7.62967	8.37007	9.16093	6.60295	5.16078	5.39178
Oaz1	5.06961	9.78219	4.15566	8.12016	11.7359	7.55245	18.0224	6.16209	5.25646	7.33239	4.69695	4.68252	5.48127	9.67113	8.10555	17.0015	3.41582	5.39571	5.29359	10.8563	9.89129	8.23213	4.55148	5.18054	4.78879	4.65828	3.99418	4.4611	6.2291	4.81556
Ndufs7	5.28559	11.9581	7.73203	8.44031	7.9871	6.27177	16.8868	6.33043	7.05134	6.6453	5.8744	6.99282	6.43453	9.87575	5.46664	5.97753	3.63186	6.61092	4.76947	7.88235	12.4628	8.95737	6.50272	5.46546	4.99014	4.09562	5.27862	5.52554	18.6626	4.09757
Uqcrh	6.73069	7.81745	9.14407	10.7759	23.4519	7.8916	8.26831	7.6414	5.62569	8.20407	7.06897	6.53076	5.40977	8.19001	6.72073	7.20729	7.31263	5.10474	6.56021	20.3046	6.98183	6.16243	7.46115	5.52159	6.98182	8.10837	6.07414	3.66927	5.10326	7.0244
LOC100912599	6.30266	13.0253	12.4308	7.40346	12.7507	7.79036	17.605	8.36065	7.05134	8.7117	6.26402	6.7213	8.64133	7.8587	5.77653	6.94377	6.85203	5.92201	5.77403	3.9653	4.99391	6.89616	6.32221	7.77944	4.68373	4.07818	4.20135	4.50437	14.0031	5.68903
Rpl7	5.78824	18.237	5.80908	3.57258	5.69484	5.63903	7.11919	6.01926	6.49749	7.22471	7.30874	4.57773	6.01986	5.19366	7.77145	17.1947	7.0273	7.35545	4.72143	3.35998	5.62144	9.94132	8.60439	7.47724	4.56554	6.45966	4.25521	5.38707	6.2291	5.87196
Rps21-ps1	6.04741	12.0298	5.70448	21.5846	4.38952	7.13231	6.20348	5.97335	8.48725	7.78362	6.0371	6.14968	6.93499	6.79658	7.87797	5.36704	6.84387	5.29729	7.34202	20.2257	4.89298	8.08793	5.87093	6.82536	7.55525	4.0302	8.99105	7.15248	11.657	11.1997
Rps16	13.1276	9.5333	9.85612	21.9412	15.5165	6.05917	6.98004	6.23351	9.55393	6.46584	6.91483	6.34975	6.89686	7.1961	6.50284	7.02283	6.26506	8.36955	6.6563	5.43036	9.76841	9.45783	11.2003	5.94898	5.56795	3.86882	4.08948	4.64284	17.3149	6.2241
Chchd2	4.58661	5.94323	5.42288	8.04012	9.05364	6.59068	7.20896	5.51425	7.4616	5.77875	5.76735	5.02073	5.11426	4.88185	6.15905	3.518	19.0561	6.96179	4.37638	18.0807	6.11294	6.55686	8.62588	5.62088	4.35106	4.84147	3.95689	4.49572	4.50747	5.42379
Hbb	5.29737	10.28	5.51138	7.82548	10.0923	5.72002	17.4074	6.37634	7.66673	6.02487	5.34775	4.75874	6.09612	6.62119	5.34075	7.24682	8.89011	12.5586	6.46412	7.55337	9.15843	22.5164	12.8077	9.35087	11.2322	5.27764	4.21378	3.83802	7.17414	4.43598
LOC683884	8.43496	13.0253	11.5297	7.40346	11.9986	8.55472	17.605	8.70242	8.46161	8.17331	5.3606	6.8261	4.87594	4.92082	22.9996	9.0168	4.91177	6.92756	4.66028	9.65445	10.2248	10.7344	13.1473	6.66131	5.63361	9.56954	5.56865	4.3962	5.32103	5.25916
Cnbp	4.47273	6.25245	6.77055	3.09599	6.59025	12.2601	8.73515	6.50386	11.1283	11.3062	6.29399	5.78289	8.1933	4.31668	5.7378	4.75655	15.9908	5.00205	7.59097	5.2242	4.01093	5.08517	4.67611	6.64835	6.37775	4.30498	6.55477	3.89427	5.37444	20.9817
Ndufb3	7.70848	4.3556	7.86881	7.73089	7.88761	6.25153	17.1067	6.85073	7.62058	6.91706	5.43767	4.97786	4.9951	7.29354	10.4491	10.0577	7.08844	5.71235	5.62116	20.5897	6.43767	12.1807	7.74911	8.16366	11.6393	5.00285	7.76462	7.11786	8.12741	5.87653
Uqcr11	7.34328	12.52	11.6302	18.7833	12.9258	5.82632	5.9566	5.76931	7.09237	7.35803	6.08848	6.51171	5.82921	7.80024	9.00616	8.1384	5.72701	17.8816	5.22371	9.65445	7.05204	8.90223	5.07152	7.17072	5.30969	14.1101	4.79799	3.71687	2.92965	5.64788
Pdha1	5.34842	6.22983	4.39704	4.35476	5.49984	6.9602	4.56508	5.78971	6.11287	6.48122	6.29399	15.0193	6.03892	7.16199	6.02348	11.7223	7.07622	6.25577	6.25447	6.60591	4.56825	6.16667	4.03573	7.36068	5.31844	5.04647	4.25107	4.88515	3.46791	4.90702
LOC100362069	8.70591	11.1322	11.5297	16.4477	11.6643	7.12218	5.65136	8.19232	6.44108	8.07589	6.21693	5.64475	7.21621	5.70523	17.7944	9.08707	5.76777	5.04912	2.69047	5.72863	6.42012	9.08036	7.86086	6.19074	3.82578	5.46519	4.52453	4.6212	3.9692	6.73172
Rpl23a	11.6432	12.569	11.7308	7.82548	15.5165	8.18013	17.605	7.72302	7.87699	9.71157	6.42673	8.29802	6.33444	9.67113	26.4568	5.76671	7.16181	6.49539	4.82625	5.46106	6.95111	7.94373	5.5314	6.47135	4.66184	8.00369	6.77436	5.19669	5.21009	4.43598
Rpl11	8.66665	6.75024	7.16882	21.9412	9.05364	5.86682	7.36607	5.83562	6.37954	5.64543	6.48667	5.63046	4.73772	5.41778	8.40091	7.3654	7.46345	19.9654	5.97058	10.1808	7.08715	8.31695	6.02136	6.57065	5.65112	8.2305	4.83942	5.83708	6.17568	5.3872
Dmpk	12.5071	22.4002	4.73094	9.63359	11.9667	6.63623	4.93765	7.98827	9.02059	6.77349	5.59181	8.53143	5.36211	7.37149	7.9506	7.16337	5.80445	7.44531	7.38569	4.74169	6.60004	8.35088	4.55577	9.93799	5.07769	4.48381	5.03002	6.11401	14.1593	6.25154
Rpl22	9.85257	7.81745	11.7308	18.7833	13.3158	5.89213	9.38602	6.74361	6.66673	5.77362	5.67744	7.45488	8.34582	3.91717	23.3482	7.77825	5.62103	8.97716	4.88303	7.77708	7.22318	6.06489	5.14029	8.01256	7.15692	4.56668	7.82263	7.38181	5.52647	8.44666
Rpl27a	13.0255	10.016	13.0624	21.9412	15.5165	6.1351	7.393	7.67711	9.09239	6.40943	5.4548	5.74002	6.27247	6.31912	21.1306	5.49001	5.10743	7.47526	6.78733	7.08841	6.68781	7.53657	7.01417	5.9792	6.18515	5.30817	4.88914	5.25727	3.08579	5.22714
Rpl23	4.39812	4.48759	3.43556	3.4125	3.24339	11.5008	6.06433	5.82542	9.80009	5.81464	6.54233	7.33579	8.33152	5.71011	8.70112	4.05822	15.2285	5.44705	3.86537	4.82942	6.83701	7.37541	11.4883	5.49568	5.39723	5.73562	6.81165	17.4377	8.62048	8.89941
Rps23	6.14558	6.45232	3.52004	21.9412	7.54934	5.83138	5.48528	8.30964	24.0002	6.72221	7.2488	10.9942	9.79478	8.22411	3.7913	4.33492	9.42816	7.3255	4.73453	6.14534	6.1656	4.21573	10.4267	8.8285	6.93805	7.03104	7.52431	4.91544	5.83875	4.98934
Hsp90ab1	14.0858	3.98226	10.1176	10.9251	13.1487	6.31733	5.49874	8.94727	10.5796	6.24535	7.88248	8.63147	7.40209	9.15956	8.8609	9.37694	7.39008	5.67384	20.7201	4.95224	8.03064	7.88011	9.77342	7.23116	3.74699	9.05486	13.6855	13.1323	20.7828	8.04879
Rpl12	10.2885	6.41838	13.1227	20.7843	13.3158	7.89666	8.25934	5.97845	5.22569	9.10652	5.81873	6.62127	6.99695	9.13519	8.62364	5.77989	7.47568	6.17447	7.53419	7.53144	23.4424	7.13366	5.23484	7.03258	10.6588	5.67455	4.95958	9.24673	7.95894	5.46038
Rpl6	5.29737	4.03883	11.8354	7.56354	9.49935	9.98726	6.61645	5.7336	5.69236	8.44507	5.64319	4.7111	4.87594	4.58465	10.1973	20.1989	18.73	4.75387	6.0623	8.89122	8.20178	12.2909	12.7089	4.8438	5.14335	3.86882	5.64323	6.38228	6.4633	6.17836
LOC691392	7.33936	6.84451	5.55563	21.9412	9.26058	7.45627	7.12817	6.95276	5.54877	5.70183	6.56802	6.14968	6.00079	6.83556	21.5954	5.72718	5.32347	5.57114	5.23681	5.68477	8.36415	8.4866	4.10879	5.02512	5.12584	4.57977	4.01075	5.50823	6.17568	5.81708
LOC100911575	21.4565	11.4151	5.73666	6.24292	9.15711	5.68459	6.11819	7.43226	8.03597	6.74785	5.93434	6.65938	5.79108	5.74908	3.23447	7.93197	5.6944	4.6469	4.76074	5.99182	6.63954	9.8777	7.86945	5.94898	9.25803	3.5068	3.84502	6.21353	16.037	7.55946
Nexn	3.70306	6.82943	14.7158	9.54264	11.6842	5.26444	5.41346	6.53957	7.03596	7.66055	5.79733	5.76384	24.2272	6.31912	4.33845	11.7223	4.30443	4.98065	7.18478	5.17595	9.91323	5.5517	8.30354	7.25275	10.5887	5.63094	9.4261	6.43853	4.24861	6.30184
Pkia	6.07883	6.01111	5.28208	7.23975	4.21442	10.4681	19.4543	7.58529	5.90262	8.70657	7.18029	9.58893	8.42685	10.056	6.10095	19.3512	8.26238	7.20569	7.128	6.74189	5.25283	7.4263	4.61594	3.64796	7.70408	10.1933	11.6469	10.5448	8.24246	8.4741
Ppp1cb	6.17307	10.906	12.2095	7.67268	11.5767	3.78129	5.70074	6.13148	8.57443	24.8583	5.79733	9.83187	5.95313	7.15225	7.05967	3.76835	5.36423	4.86512	5.78713	6.53573	9.75964	11.7226	8.30784	6.94192	6.601	12.3174	5.07974	5.43034	5.66618	5.70733
Serbp1	7.93624	8.86204	9.71532	8.18928	9.61874	8.56991	5.22044	7.60059	9.19495	8.46045	8.68743	9.9319	5.76248	10.017	9.44195	4.47985	8.617	17.9115	9.77917	8.03149	8.23689	10.323	11.239	8.27159	8.51826	7.5021	8.10852	23.2012	5.51415	5.55184
LOC100360647	10.5201	7.48937	7.73203	16.786	4.03136	5.62384	7.02492	6.97316	5.75903	5.55313	6.69219	5.73049	4.73295	7.56638	7.37924	6.77687	5.55173	4.07352	5.4683	8.59733	19.2253	7.17183	9.18461	5.30141	5.50229	5.27328	5.7841	5.90198	7.03855	7.10215
Txnip	10.1471	8.5943	9.59865	7.54535	22.9624	10.6757	5.13515	7.09049	8.05135	9.43469	4.98382	20.7832	8.81769	8.90133	7.73271	4.46668	7.75286	7.89459	8.63921	6.88225	9.37785	4.91553	8.29065	8.55652	7.7391	10.3197	12.5916	8.71019	6.7838	9.07319
Eef1a2	5.67043	10.1178	7.03606	4.06372	5.35657	8.08902	17.5825	6.85073	5.52825	8.3015	5.90008	7.936	5.75771	9.46163	9.5291	6.67586	7.40638	8.45513	5.11015	7.2551	8.64061	7.8589	6.53711	14.8811	9.72203	10.2936	10.3542	4.26206	6.4592	7.82928
Cisd1	4.86149	7.72318	7.73203	11.409	7.74832	7.09687	5.16657	7.23842	3.13336	7.44007	5.69457	24.2891	4.69006	6.19244	5.95085	5.07717	5.23787	9.26812	8.97552	5.65845	4.90176	3.70679	6.9583	8.56083	7.6822	5.38668	4.40023	14.8285	9.47513	8.35062
Rpl13a	6.47937	2.85471	18.2962	4.23471	9.95303	7.45121	6.10473	7.6567	6.31288	7.48109	6.29828	8.59336	5.01417	8.70158	6.80788	7.80021	6.56669	6.24721	5.90943	4.9654	4.66918	7.81649	4.89531	7.57222	4.28977	7.28401	7.1224	6.40824	19.7926	4.79726
Atp5d	12.4561	7.81368	12.825	7.18518	13.662	6.68685	17.4074	7.70261	5.81544	7.80925	6.08848	8.54572	7.71667	8.64798	11.0011	7.16776	7.8996	8.60061	5.21934	10.1808	12.476	10.6793	10.186	4.40777	5.46289	8.94582	5.90426	4.05004	14.1922	5.10367
LOC100362479	8.33679	6.84451	9.39751	17.1498	9.34017	6.41857	8.0753	5.56016	6.01544	5.66594	7.64699	10.132	8.1647	6.34835	7.54871	19.5005	5.39276	7.30838	7.91418	3.82932	5.03341	5.52626	5.96119	4.68407	5.48916	4.35296	4.82699	5.11448	7.10018	8.81252
Serf2	12.4561	14.5074	11.7308	7.82548	13.1964	7.58788	17.4074	8.24843	7.00519	8.47583	6.59371	6.33069	6.98266	6.6017	26.4568	9.72391	4.87101	6.0461	5.95311	10.0448	14.227	11.1543	12.494	7.81829	13.1582	9.86177	12.0696	9.05634	6.17979	4.9619
LOC100362684	3.87977	10.016	8.95499	21.9412	13.1248	8.69645	7.9945	6.16209	17.1489	8.46558	7.42006	5.33036	7.20191	6.04141	8.45901	9.06511	6.81942	6.70077	5.71725	4.27673	6.82823	5.47536	4.39245	6.97214	4.37294	3.71179	4.84357	6.45584	6.40167	5.07623
LOC100361854	13.1276	14.5074	9.3613	21.5846	11.7956	6.42363	8.55559	8.1056	8.23084	8.6553	8.33205	8.19799	8.25526	10.9866	24.4571	5.51197	4.94438	6.25149	4.32397	9.672	9.78158	10.0389	12.1373	6.03101	6.45655	8.55763	5.83797	7.83181	8.0329	7.92989
LOC690462	11.5608	13.0253	13.0624	21.9412	9.98885	8.67114	8.6723	7.56999	5.93339	7.21446	6.85917	7.57873	10.5288	7.47868	25.7257	7.40932	6.11832	7.10727	5.38094	8.95263	6.71414	6.18364	5.7248	7.68446	6.09761	11.7635	11.6469	8.89192	6.20855	5.58385
Rps15	8.66665	7.81745	12.821	21.9412	13.1248	17.0841	9.46233	7.27412	6.93339	7.13242	7.50141	5.64951	5.21435	9.89524	6.87567	7.67724	5.94712	11.7071	6.03609	3.77669	9.57094	11.0355	8.89235	7.59812	4.54366	7.27529	4.52867	4.43082	4.65128	6.6494
Sepw1	4.48844	8.87336	6.36424	4.34021	4.06717	5.41124	7.43789	5.53466	5.54877	6.82989	18.5352	6.41167	7.24957	6.97685	7.30177	5.18257	5.09112	4.66829	8.37715	6.63223	4.38833	7.1167	6.06863	4.30416	5.10395	5.15987	8.7756	6.15728	18.6626	5.77135
Idh3B	10.2531	13.4665	13.0141	4.83499	10.0804	7.03107	21.573	6.85073	6.39493	4.98398	6.25974	5.23985	6.00556	9.19366	7.2824	9.14417	4.68758	10.7144	4.97912	8.22888	11.6335	18.4958	12.812	7.75353	9.40248	6.01476	9.59184	5.25294	7.9836	7.76983
Ak1	10.5869	14.5074	10.7814	14.1848	14.2232	7.28417	23.0409	7.66691	8.09751	11.0088	5.4762	8.32184	7.35919	10.4945	9.09332	9.97865	9.10207	20.9324	5.49887	6.20675	12.3093	8.88951	14.8836	9.72214	13.771	4.59722	8.96619	9.28567	6.26197	6.10519
Rpl34	11.5097	10.016	15.2106	21.9412	15.4966	5.55297	7.12368	6.90685	5.80005	5.55313	6.46526	6.50218	5.20482	7.29354	9.65015	18.3718	5.33569	5.45989	5.05774	4.27673	6.86334	6.23029	5.17037	7.9478	5.45852	12.3087	3.73729	5.04957	5.16489	4.74696
Klhl41	3.28681	6.24114	4.42117	4.30019	5.61524	7.30948	14.9925	5.19799	6.64108	8.3015	6.05422	7.41677	4.40884	4.99391	7.41798	5.99949	4.5816	6.28572	4.60787	4.73731	4.91054	3.65165	3.58445	6.56633	6.35587	7.14008	4.5121	5.75054	14.3319	5.61129
Ldb3	11.7218	7.56479	4.87174	12.4604	8.35322	5.65928	4.38104	5.59587	5.72313	6.26073	6.01569	4.94452	7.73097	7.29354	8.83185	8.34482	4.6509	5.38287	5.72599	7.90867	8.1184	8.60111	2.6561	5.34459	4.49113	5.16424	4.95129	4.81592	8.42736	21.215
Lgals1	14.4431	13.9869	10.721	21.2026	9.79385	8.7572	8.17405	8.91667	7.96417	9.73208	8.84585	10.1034	8.23143	9.77831	5.74264	10.6243	6.37104	9.54197	8.80081	20.4011	9.4349	12.0407	12.5413	7.24843	11.5649	13.6346	7.69419	12.1934	8.01647	6.73172
Cs	4.75154	4.03506	8.09006	3.53984	6.06892	6.05917	16.0608	6.63649	8.39495	5.87617	5.02235	10.3463	9.0989	5.00365	6.14453	7.50156	6.29767	17.0472	8.14566	5.03997	5.98568	4.3981	3.6919	3.8854	6.23768	5.27764	2.67246	5.6164	6.47563	6.31099
Col3a1	14.5845	10.016	15.1543	21.9412	15.5165	13.7078	8.42991	9.40127	12.7899	11.7113	9.77496	12.6376	8.59844	11.2351	11.34	9.6756	7.96482	7.74055	9.63067	8.53154	9.21109	22.4698	7.38379	7.67583	11.4336	11.9641	14.1454	11.4535	10.4859	10.3125
Gpd1	9.09075	11.0681	11.775	7.36344	3.62941	8.63065	21.573	6.6671	8.35905	10.7268	6.65793	9.67467	8.59844	8.90133	8.63817	9.31985	7.07214	10.3635	8.68725	8.89561	8.29832	22.5037	7.69754	8.13776	7.39329	11.3666	6.55477	7.98326	8.30409	11.9086
Col1a2	9.31458	13.7079	15.1543	21.5664	11.1748	10.5694	9.90671	7.12619	10.636	6.82989	7.76259	11.2133	5.76248	11.3569	10.5266	5.98192	7.87514	5.55831	8.66978	9.64568	23.4424	10.0643	11.6086	7.84419	11.6087	5.42158	11.4563	8.01787	5.05395	10.1342
Actg1	11.9731	22.4606	9.78371	14.5086	13.662	9.59242	8.3132	9.21253	8.50777	8.11691	6.35822	9.64133	9.13227	10.4312	8.49291	20.1989	7.61019	10.4191	9.03667	8.81665	12.2698	8.57142	13.5126	7.9478	9.17048	7.4454	7.13069	8.77076	9.42993	11.0625
LOC100365570	9.13002	7.81745	10.5038	12.3585	20.2403	7.40059	9.38602	7.72302	8.30264	8.1528	7.89104	5.31131	8.81292	10.9866	24.4571	5.51197	8.45803	6.94039	4.82625	10.172	7.02571	6.72651	7.91673	10.6028	7.15254	8.45295	10.8928	10.5448	6.11405	4.60062
Fkbp3	3.36534	9.7935	4.10336	4.79133	9.59089	6.90958	7.09674	6.07027	6.6257	10.532	6.62368	4.56344	5.97696	6.51888	6.53189	6.23666	4.0354	6.23009	5.99678	4.02232	5.4503	4.36841	5.60446	5.43093	15.4257	7.04412	6.26888	4.72938	20.1008	8.60215
Sdhc	6.18485	9.39	8.13432	5.99553	4.10697	7.11206	17.8339	7.79443	6.10775	6.91706	6.59371	6.33546	5.11903	9.42752	10.1973	8.33604	5.02591	8.90869	6.67813	9.55357	25.4435	7.99038	14.0541	5.23666	9.78331	6.0671	5.10045	6.87122	5.70316	7.13416
Zak	11.5136	7.18391	14.2371	20.1658	14.9037	13.7078	9.82592	7.97807	10.6052	14.0238	3.75499	12.5614	9.82338	11.1425	11.6596	7.27317	9.71757	8.60489	9.61319	9.01404	8.58795	8.49508	8.00269	9.32928	21.497	14.2583	8.33226	11.5314	11.0735	10.4726
Dcn	8.76089	7.42149	5.48322	18.7833	4.40544	12.0222	9.17953	6.95276	10.3437	11.3934	9.85203	11.2133	5.85304	9.26187	8.34765	20.1989	7.0273	7.8518	9.34677	10.7554	8.09646	14.5006	12.3006	9.52355	13.8017	5.48264	8.46485	8.11306	8.3082	10.3948
Ndufb2	11.4783	14.5074	15.2106	7.82548	13.1248	10.4732	17.4074	7.84544	7.81545	9.85002	6.55517	6.32593	7.95022	25.2765	9.93099	8.27016	7.48791	7.98445	5.66484	6.5445	10.317	8.12186	9.47257	6.58791	6.48281	9.73092	3.92374	4.87649	4.52801	5.73934
Ybx1	3.41247	3.5335	9.01533	3.08872	11.3658	7.95235	5.94313	9.42677	9.077	8.22459	8.17791	5.69239	23.1023	7.82947	5.69422	5.18257	8.55179	10.1753	8.06268	4.52676	13.1343	10.3485	10.5857	5.12873	5.66425	11.5934	9.81972	6.04045	11.546	25.0061
Eif4g2	8.19149	4.78173	7.15675	8.09469	4.88299	6.67673	5.8758	5.03986	7.34365	9.71157	7.52282	24.4082	5.22865	6.52375	6.43505	7.04039	5.71885	7.26559	4.52925	6.79014	4.3225	5.3142	5.37237	6.61382	5.59421	3.63328	3.63371	5.09284	9.56142	25.0061
LOC100365794	8.80016	10.8004	13.7463	19.1726	14.4261	5.882	5.96557	6.59058	7.12827	6.19408	9.33395	5.84005	6.44883	5.88063	10.6282	6.89546	15.0899	5.29729	5.4814	10.8958	9.98783	9.91163	8.97401	7.19663	4.54803	5.1337	10.868	12.3838	4.91014	5.36434
Tfrc	7.78702	6.56923	3.76544	8.83686	9.70231	9.18746	5.0364	7.80463	8.23597	8.55275	8.96145	5.52566	17.8499	5.71011	9.90194	8.33165	7.87922	10.3079	8.67415	7.81217	7.65324	21.876	9.19751	6.59223	6.54847	10.3154	5.88355	3.96783	4.74989	10.189
Svil	5.6076	11.0191	8.05788	3.60168	11.0037	6.74254	6.64338	6.56507	8.5129	6.96321	20.205	9.66038	9.93777	8.82338	10.4539	7.0931	5.98788	8.93009	9.504	10.773	10.3521	10.5902	9.70896	9.25157	6.11949	9.24677	10.0227	8.37701	7.68365	20.0031
Col1a1	14.0033	11.2341	13.0624	20.1476	6.87678	9.13685	8.56008	6.71301	7.73853	7.15806	5.11227	7.51204	4.49464	10.3337	9.8051	5.81942	7.814	4.32598	8.8969	9.3167	18.7469	12.2528	11.729	8.36225	11.1622	4.70626	7.74805	7.96162	7.48642	7.55032
Tnnt1	11.5097	5.09473	8.89465	17.4409	5.52769	8.37249	8.65435	8.55959	5.58979	9.23984	7.91245	8.50285	8.57937	8.38489	7.8925	6.5968	15.1755	7.11583	6.84411	4.65835	5.81014	6.83254	6.77349	8.68603	5.79995	11.7373	6.04928	11.1895	6.74271	4.50915
Rpl35	7.0684	6.73892	8.47224	17.1753	7.9473	6.454	5.08129	7.621	19.0566	5.94283	5.99	7.91694	6.01986	6.34348	6.89988	5.98192	5.05852	5.31441	4.76074	5.49615	7.22318	4.24118	9.39091	5.69427	5.22214	4.26137	3.43069	3.95052	4.51568	4.66922
Ptp4a2	7.95195	8.40951	8.60097	5.59171	8.58006	9.79996	5.62443	6.63139	9.95393	9.99872	7.38153	10.5369	20.233	10.2314	9.38868	6.73295	2.99598	7.88175	8.97552	10.1106	11.7914	9.47055	5.64744	4.18328	7.14816	7.72891	9.67885	10.7568	15.6508	11.4147
Nnt	11.3683	5.15884	10.367	4.8932	9.84956	12.3714	8.3132	26.5205	8.53854	10.655	8.82444	6.45931	9.01787	4.49695	7.58261	4.46228	9.57898	5.84071	7.11053	6.61907	7.72345	9.83529	13.2891	9.52787	24.7975	7.97316	3.96518	6.29141	9.39295	9.96953
Ndufa6	4.83793	10.6081	8.50442	9.21522	4.71187	6.68179	17.8339	6.7028	8.32315	8.05538	6.6879	5.62093	6.09612	7.25456	8.41059	5.21332	5.38461	7.97161	5.29359	10.716	24.1314	12.3121	7.43107	4.81358	10.615	8.15635	6.07	5.54285	4.85261	5.67989
Ndufs1	10.583	7.47806	8.92281	7.9237	9.98885	8.64583	18.1032	3.30039	5.96416	9.3629	8.22929	5.94961	6.3249	9.99756	8.41544	19.3161	5.83706	8.59205	9.93203	10.001	9.53144	5.48808	9.55423	4.792	9.69576	12.928	8.16238	4.30533	9.81617	10.1159
Eef1a1	6.08668	7.04061	9.35326	7.49805	5.95749	6.73241	6.00148	6.55487	6.01544	5.75824	5.6646	9.76518	8.74619	4.95006	8.7108	6.29375	6.65229	8.5621	9.42539	19.2958	7.84633	9.16095	12.2318	4.14011	9.71327	5.19913	9.8943	21.4574	8.7684	5.91769
Rtn2	15.1421	7.13489	8.48029	11.0852	13.1964	6.94501	17.8339	8.35045	5.94364	7.36828	5.5233	7.13573	8.77003	6.99147	10.5169	9.77662	7.76916	9.64039	5.37658	5.42597	8.46947	6.65865	5.29931	9.02277	6.97745	4.667	2.40728	5.36544	16.3658	6.40245
LOC100911483	6.04741	10.3667	5.29012	18.7833	9.65456	8.61546	5.9566	6.95786	9.05136	6.09153	6.11845	5.07313	7.85013	7.57612	5.91695	8.17793	6.5993	19.1353	4.60787	6.20236	5.22211	13.1434	12.5327	6.79945	11.7925	6.80423	5.70124	4.04139	4.93479	9.2241
Srl	5.11674	10.016	11.2561	21.9412	11.7797	7.55245	7.16856	6.00396	7.25647	6.79913	6.63653	4.90641	4.9808	7.33739	6.34305	7.65088	6.28136	9.5976	10.6483	15.3568	9.90445	11.9813	3.98845	6.95919	11.2541	8.21305	5.32834	5.75487	5.77712	2.50153
B2m	14.0858	10.016	23.0754	14.5086	15.3693	11.5008	8.18303	7.60569	9.39495	11.378	9.15412	8.83153	9.1561	11.0402	11.0108	10.6243	7.69172	7.02169	5.64737	9.71148	23.7891	12.8041	8.82359	6.34616	9.10482	12.1865	8.96205	7.7972	7.91786	11.1997
Calm1	10.7126	10.8984	11.3808	7.06876	13.4869	9.62279	8.13365	10.0593	13.9078	11.8293	8.85013	8.03127	10.8052	9.85627	7.75208	8.9641	6.31397	8.63484	10.9322	9.61059	8.5309	11.2052	12.5757	8.16366	23.7995	11.7373	9.06977	13.1713	16.2178	9.85063
Glul	10.6733	9.63889	14.9049	13.0206	12.699	7.08169	7.08328	6.31512	6.75391	6.86579	4.00332	7.76927	8.82722	9.39829	8.62364	8.06373	15.8807	6.17019	7.5735	7.31212	13.7969	10.217	13.7103	6.42386	11.7662	13.9181	11.7754	13.4179	7.08786	24.5854
Acadl	12.0163	21.0238	10.1739	6.63219	12.695	10.1087	5.13964	6.75892	8.86162	10.5012	4.85965	6.83563	6.48219	7.51278	7.36472	5.58225	6.13055	8.13849	19.4579	5.1584	5.96812	5.15727	5.60876	5.37049	6.1764	3.75105	3.77458	4.50005	7.41657	6.32928
Gpx4	4.01328	7.35738	7.65157	4.95868	8.29751	8.09408	16.3391	7.75872	6.38467	5.55313	6.33253	4.87783	7.24957	5.42752	6.67231	4.58087	5.2827	2.92678	3.66446	6.9963	6.90284	4.51685	8.27775	6.27277	6.30334	4.70626	3.53841	4.92409	18.6626	8.75306
Coq9	13.3946	11.6564	15.4158	13.9301	7.84383	8.06877	17.5062	8.87586	8.91803	10.009	6.88914	6.94519	9.99497	9.95858	22.9996	10.1807	5.95935	7.33405	5.11888	4.84697	8.89514	11.8159	12.3522	7.43839	5.91814	4.64956	7.72733	4.71639	3.23371	6.21495
Myl12a	12.5975	7.04815	14.3779	18.2376	10.6256	6.63623	8.66332	8.38616	7.5693	7.799	6.87201	8.16464	6.64425	8.40438	9.38868	18.9911	7.69172	4.9507	9.66124	9.65884	6.464	6.58231	8.36801	7.81829	8.25125	7.10955	13.7393	8.26451	9.06835	10.8018
Sepp1	10.1	5.33608	7.24525	15.7164	8.05873	9.32414	8.14712	8.09029	5.05133	8.9527	10.4814	10.4559	7.49265	10.514	4.49824	18.5606	7.97297	9.23389	7.24156	6.18482	10.8392	9.51296	11.4066	4.98627	5.2309	9.6655	4.71098	6.91449	5.27172	10.468
Ndufa9	11.4783	14.0888	15.4158	12.6859	7.56924	7.4664	17.4074	9.29415	8.20007	10.3166	6.4096	5.69239	6.59658	9.10109	9.19016	5.43731	5.41722	10.9583	7.60844	19.6335	11.3658	10.8574	13.1	7.74922	5.62923	11.4451	7.65275	4.1236	8.1685	6.33385
Sucla2	5.52906	4.65352	8.26707	8.55309	7.7523	9.19759	16.8015	9.34516	9.02572	7.97334	6.94052	4.88735	2.61194	6.97198	10.0327	8.88065	8.20531	10.9369	7.99716	6.43045	11.1069	22.7115	7.358	9.45016	4.92448	9.51284	10.665	9.9477	6.92761	4.093
Mbnl1	10.2885	9.20898	14.7842	21.2026	15.7474	12.579	9.84836	8.5749	11.7488	7.44007	7.24452	4.92546	8.54124	10.2607	11.0011	5.12548	7.5572	7.26987	6.29815	9.01404	7.5567	8.92768	18.9881	8.77669	8.35193	14.1755	11.7464	7.65441	11.5173	9.66313
LOC100362830	7.64565	18.2407	7.87685	11.6673	9.27252	6.7476	5.16208	6.64159	5.95903	8.2092	7.86107	5.30178	5.88164	8.22898	8.33312	5.01129	2.95114	5.13897	9.1808	16.3218	7.00816	7.48144	8.96112	4.48116	4.32917	6.29827	12.9645	10.216	5.11148	9.37959
Eif1	8.7177	14.0888	12.1773	13.5663	5.67892	8.90399	6.66133	8.89626	8.48213	6.78887	7.11607	7.46441	4.93314	8.74055	7.30177	10.7077	6.72159	9.89712	19.436	9.49216	7.66202	12.1595	9.77342	5.84969	10.7288	13.639	13.0225	13.2968	22.0114	8.593
Coq8a	10.9246	10.4874	3.81774	4.27836	7.62495	10.0885	5.795	5.75911	7.68212	6.80425	6.55089	6.8261	5.73865	4.53593	6.10579	10.9273	7.02322	4.76671	7.5604	6.01375	12.7086	4.49565	7.17319	7.25275	23.7995	7.95571	4.40023	4.60389	21.3334	10.564
LOC100361944	9.43632	9.36737	7.21709	18.234	13.3158	9.54686	9.30073	5.2388	5.5539	8.51173	5.65175	8.33613	8.14087	5.61754	24.4571	8.59077	9.56675	6.6965	4.7389	7.08403	7.65324	6.82406	8.7978	9.3336	5.23965	8.5271	7.63204	4.12793	5.17722	7.60977
Slc4a1ap	9.91932	8.97518	11.944	11.318	11.9667	6.54512	5.37755	6.14679	7.07186	5.9377	5.1037	9.36981	21.6057	7.87332	7.95544	6.60119	9.36702	6.66654	5.09705	5.78127	8.37731	8.52477	6.07723	10.3049	8.17683	7.48465	21.7028	11.3323	9.4628	7.7927
Nrep	10.2885	9.00157	24.1857	12.4204	13.3039	8.52435	9.63739	11.3295	10.677	8.74759	6.88486	9.84616	7.88826	8.50182	9.6792	9.91277	8.54771	8.32248	10.692	9.58427	8.32904	20.9005	8.68176	8.06005	5.72553	9.84869	11.6304	11.6828	8.94919	8.53812
Hsdl2	24.2407	12.3692	10.1739	9.44805	15.5165	7.92197	6.05086	8.56469	10.4514	11.3934	5.93006	9.92714	11.1722	9.55907	5.65548	4.96736	5.32754	6.02043	8.56059	4.6759	6.1656	7.70198	7.7706	8.73352	22.7008	5.32562	3.77044	5.40006	10.112	8.52898
Rpl18	3.69913	3.8729	4.8476	10.0483	3.87615	9.14191	5.96557	6.17229	5.4103	8.47583	7.60417	6.06394	5.55276	7.10353	7.61166	5.38461	7.93221	5.83216	3.28884	6.41291	18.0053	6.57383	3.80364	6.85558	3.89144	4.78477	5.92912	2.48801	4.66771	7.2119
Psma6	12.4168	7.81745	9.63888	14.5086	13.1964	7.68912	17.8339	6.84053	5.53338	7.90155	8.22501	7.58826	8.00741	7.78075	5.6458	8.9641	4.94438	4.71536	7.74384	20.3046	11.3702	9.27122	9.05138	7.40385	6.95994	5.3736	6.06585	7.36883	7.8439	7.52745
Fam134b	11.7178	12.2334	7.34985	9.32436	12.5199	10.1087	9.62392	10.2787	12.5847	6.01974	7.88676	19.6923	9.30385	9.96345	8.03292	6.14882	4.29627	9.11836	8.07578	8.8649	11.0761	7.44751	9.88517	7.20958	7.81789	22.816	12.0737	12.2929	7.7987	10.468
Rpl41	8.72948	7.81745	9.58256	21.9412	13.1248	7.85617	9.46233	8.31984	8.89751	7.64004	6.37963	8.10272	9.88058	6.43605	24.9364	9.41647	7.26372	11.6985	4.82625	9.16756	5.61267	10.3485	10.5299	8.61696	12.6767	10.4593	8.9579	10.441	5.94558	5.99086
Mpc2	12.0281	6.29771	7.65157	11.2525	8.73129	6.4945	21.8872	5.37142	6.02569	4.1687	6.88914	4.92546	6.35827	9.59804	6.19295	7.04918	5.15227	7.00886	7.25466	10.8563	10.4398	19.467	11.0198	6.51452	8.04551	11.8943	3.85745	5.49092	4.9389	6.19666
Ndufc2	3.6952	13.0253	23.0754	7.40346	9.26456	7.38034	8.49724	6.6875	5.33338	8.07076	7.82254	6.63556	6.3392	8.9598	10.328	5.45927	5.3683	9.86289	5.64737	19.4844	10.9094	10.0601	8.89665	6.05259	6.71043	10.4768	8.93304	4.56928	9.50389	10.189
Atf4	12.5229	9.17881	8.9389	10.434	12.1975	11.5058	11.4553	8.35045	9.62573	14.0238	5.8744	11.1656	8.39825	11.2351	11.4562	9.53945	10.3371	6.8377	9.90583	7.86042	9.85618	8.79196	5.69901	10.4042	21.8691	13.1287	11.4563	21.6435	5.88806	10.4863
LOC100361259	11.7061	10.016	12.0245	21.9412	15.5165	6.32746	6.84088	5.76421	6.41544	6.19408	6.34537	5.98296	5.11903	8.4531	4.8275	9.01241	6.12647	7.24848	4.92671	9.10616	10.4574	6.73923	5.58297	5.67269	7.72597	8.36135	8.59743	5.81544	14.3319	5.28202
Synm	6.47544	12.8594	13.2313	6.44301	11.4693	6.92477	9.3546	7.6312	9.10777	8.65017	7.06897	10.9608	9.79955	5.96833	10.5943	10.1807	9.52191	20.3291	5.47703	8.29906	9.51389	11.9135	10.4396	9.58399	9.49441	12.928	12.6372	12.6477	16.8424	8.55184
Hint1	10.1	22.4002	15.3876	9.86643	15.4966	6.79822	7.37954	7.54448	6.21544	6.9427	9.14984	6.74988	5.98173	6.77222	5.18581	5.05521	7.0966	6.47399	6.50343	23.2654	6.83262	7.10397	7.86516	7.4427	11.3022	12.3087	3.80773	4.12793	5.09915	5.78507
LOC100912446	3.7973	3.40906	5.52747	3.35793	8.81884	11.1718	7.6354	9.16662	8.38469	10.2397	6.96621	7.08809	6.78724	7.02557	6.97251	4.74776	16.2353	3.21774	6.79606	8.11922	7.71468	5.93341	12.0986	5.15895	9.41999	8.79316	3.50941	10.6054	18.675	10.0884
Selk	13.1276	11.6526	24.7409	7.39619	10.0167	8.0384	9.21993	10.1409	7.85135	9.48596	7.7369	8.27897	5.19529	8.02436	8.68659	9.15295	7.51236	10.9369	9.11092	5.10138	16.7722	10.1364	7.73192	7.63266	10.9652	10.1845	7.93864	7.3169	5.89217	9.80032
Gsn	10.4102	12.0071	12.8331	7.33798	10.6694	10.3517	10.6384	9.79915	6.32313	11.3062	19.9395	10.0986	9.13227	10.6163	8.84153	10.7868	10.0396	8.9472	5.25428	7.69812	10.5495	5.64925	8.8021	9.91641	9.21426	11.4974	24.0107	9.03038	9.97642	10.2714
Dhrs7c	11.9338	7.13489	12.1492	7.37799	20.2403	6.95008	9.46233	9.35026	8.45136	8.25535	7.30874	7.31674	6.10089	11.0451	10.052	9.74148	8.03004	10.6759	9.09781	19.6335	9.4349	5.48808	9.71325	9.00981	9.31931	11.8943	6.54648	7.9746	6.53726	9.88721
Rbm24	21.7118	8.52642	12.4187	7.05057	13.085	5.7757	8.47031	8.17191	8.98982	6.22484	6.8977	8.66005	9.22759	8.3313	8.27018	6.79005	4.56122	7.42819	9.09344	7.17614	25.3689	12.3885	7.21617	6.7865	6.51345	14.1101	4.11434	5.1188	6.73449	7.09757
Park7	15.3463	22.4606	15.4158	9.34983	13.3317	9.78984	8.2728	9.67163	8.67187	9.25009	7.40294	9.18403	5.19529	9.3788	10.3377	9.4033	8.03411	6.67938	8.67415	18.4623	8.18423	9.91163	7.49124	6.08713	8.61019	10.1976	6.57963	7.3169	3.85004	5.4558
LOC100909439	8.12081	9.81613	11.0912	17.3499	11.0554	6.68179	7.14612	10.3093	8.28725	6.37354	4.88534	9.96525	8.92731	9.33008	9.53879	6.99208	7.27595	8.02296	18.2655	10.3519	7.34167	9.55537	10.8264	6.83399	8.76339	14.2583	10.7395	12.4271	10.0298	5.79879
Trim54	14.769	13.4665	13.69	8.73499	12.4483	13.2623	9.7541	7.24862	10.3488	14.0238	8.86725	6.16397	23.2215	8.72594	8.66238	7.28196	9.44854	8.92153	9.84468	5.4479	10.4925	9.67837	7.87375	9.3336	12.1339	10.0668	13.3913	12.7819	7.57271	23.2729
Cst3	13.1237	13.9869	14.1606	5.11512	8.53231	7.56257	5.44937	8.06989	6.13852	8.39379	4.85965	7.89312	8.89872	9.21802	10.3522	9.31106	9.77871	10.2052	19.2832	6.40852	9.00484	12.6005	12.3479	9.54082	14.3445	11.7809	13.1012	12.9549	22.0114	8.593
Snx3	7.37077	4.4725	4.13152	10.8851	9.8416	9.06598	5.97455	9.0493	7.91802	9.76285	9.52234	7.39772	21.2721	6.17296	5.70875	7.04039	7.27595	10.4619	7.43811	5.9962	11.4009	6.4169	12.4338	5.13305	12.4929	12.4003	9.99374	7.54623	22.0114	13.1662
Hspe1	10.4141	12.569	21.2731	14.1412	13.1248	10.2302	5.86233	6.6773	5.40518	11.137	21.1042	6.04965	8.96068	8.40925	10.1731	5.1123	9.18359	7.07732	6.61262	6.76821	10.4574	12.3249	6.67894	9.3595	5.09958	7.68093	3.89474	4.52601	5.23885	7.91617
Sparc	14.0033	13.4665	9.3613	20.7843	12.5199	12.2753	7.29874	9.51859	11.7693	12.2292	7.48857	11.2133	7.22574	11.3812	11.1705	9.99622	7.87514	7.87748	9.75296	8.97895	25.7288	10.4036	13.2891	7.96939	7.24446	10.5858	13.0308	11.7694	9.38063	10.3811
Morf4l1	4.57483	19.4739	9.75153	7.39255	5.2133	6.18572	9.18402	5.61628	7.1334	5.8813	7.06041	6.81657	23.1023	11.0938	10.7832	4.30417	9.70126	11.66	9.08034	6.64539	13.0289	12.486	10.8866	10.5683	7.62529	12.4657	6.69564	6.84094	6.31949	10.8339
Usp13	8.14437	5.5812	8.04581	18.6269	5.69882	9.32414	7.1147	9.67673	8.78982	7.29137	5.92149	9.21738	10.0188	10.8015	8.25081	10.655	4.85471	20.0938	10.941	8.33854	9.22426	9.81409	12.1888	5.38344	6.43028	7.43231	5.97884	12.228	9.17107	4.82928
Scn4b	13.587	3.60893	12.821	10.4558	13.5785	12.3714	6.27979	12.2783	10.1642	10.0705	10.52	6.25448	7.86442	8.11693	9.75668	10.2114	6.70936	11.1081	10.823	10.2642	7.43382	9.54689	23.849	9.12206	9.54256	9.90103	11.6096	7.60248	18.9955	9.95581
Ndufb10	11.5608	13.0253	12.1089	21.9412	7.33046	8.77745	9.46233	10.7071	12.3334	9.74234	5.45908	7.7788	7.7977	9.99756	8.49291	6.8164	7.26372	5.52835	6.87468	19.5282	14.0602	12.7405	14.355	6.16484	11.3504	13.8614	11.6469	10.3934	5.98667	4.91617
Ube2d2	7.83807	10.7136	11.4814	10.9287	5.61922	9.19253	15.3875	7.95257	5.67184	9.94231	5.67316	4.43006	8.29816	8.74055	6.29463	8.06813	8.60885	7.83469	4.93544	7.26826	7.57425	12.1807	8.34222	5.37912	6.67541	8.32646	4.4831	4.07168	20.0473	5.59757
LOC100363268	6.18092	11.7846	10.9504	18.6014	7.33046	8.61546	8.84736	8.04438	10.3847	8.47583	9.80921	10.1034	8.6032	11.0548	11.1415	10.6243	7.91998	21.0009	10.7357	10.6238	13.4327	8.71138	12.7089	9.57967	9.2449	9.12901	8.58915	7.60681	7.72063	10.6052
Eef2	13.1276	10.8004	15.1543	4.49301	9.61874	9.37476	6.26632	9.36046	8.97957	9.07576	20.235	10.132	9.81385	10.2363	10.0036	10.207	9.18767	6.29856	5.6168	10.001	8.10963	9.88195	9.15453	8.84145	9.6301	11.7155	12.9521	10.7871	20.865	7.78812
Acsl1	12.2715	3.84273	3.95452	6.45756	5.4879	6.48944	7.67131	5.37653	5.40005	6.26073	5.45908	5.7686	6.94929	5.86601	5.38433	7.01404	5.43352	8.07431	9.20264	3.10557	5.7136	8.34664	10.8479	5.74608	8.22498	4.17413	19.0759	5.45631	6.75093	9.11892
Kpna1	5.09318	12.4521	3.5643	18.867	8.07067	27.7244	6.15859	5.77951	6.81032	9.49109	5.69029	9.58893	6.96836	10.0219	4.56119	5.74475	6.14685	10.064	7.128	7.31651	7.17491	6.51021	5.92251	5.56476	10.6413	10.2456	4.62811	4.88947	5.10737	4.64178
Ndufa8	5.50943	6.81057	9.43372	5.60262	6.08484	6.90452	18.0224	5.44794	7.2616	6.28637	5.83586	4.93499	5.0094	10.4702	5.51991	10.3037	3.41582	8.17272	5.59059	20.3266	11.6335	12.9186	6.82506	5.02944	12.0945	9.73092	3.97761	4.31399	8.10687	5.99086
LOC100363537	15.1421	21.5706	14.4221	9.63359	14.7763	6.46919	8.64537	8.50858	5.86672	9.32701	6.95337	7.41677	5.0666	11.2838	26.4568	8.58199	6.86425	6.7778	5.4814	6.07077	4.97197	10.2594	10.6416	7.57653	8.66271	9.26858	5.29933	11.0294	4.36365	6.48019
Chchd3	7.41789	4.31035	7.62743	6.5376	7.66873	8.03334	5.58403	6.76402	8.05135	6.58377	8.87154	10.1034	6.16762	6.55785	6.48347	7.14141	20.4419	4.63406	7.425	6.12341	5.90669	4.99187	8.07575	10.3136	5.0558	6.91327	8.35298	11.2977	7.6138	25.0061
LOC100912106	7.00164	5.47561	4.46945	5.04963	5.02626	6.66154	6.01944	6.6875	6.53852	5.85053	6.11417	7.76451	9.88534	4.47259	4.67255	4.99811	5.72293	11.352	6.75238	4.82065	25.4435	8.71138	14.8836	5.83242	9.87961	9.00252	6.02442	5.78083	17.9354	5.73019
Mgst3	9.88791	18.6933	7.2533	6.25019	10.2674	6.16041	6.3157	6.61098	6.60519	8.54249	4.20456	8.2361	7.65471	6.50913	9.03522	10.9712	7.63873	4.35165	10.2509	7.00507	7.94726	5.67894	4.56007	16.4309	7.21382	11.7722	9.62084	8.08278	7.23578	9.89179
Prkaa2	8.24647	14.0209	8.10616	21.5664	12.5199	9.92651	9.50721	11.6916	10.0565	10.5781	7.08181	8.91251	19.6039	10.6553	8.39123	6.74613	6.17131	8.65196	9.11092	10.0712	10.1502	5.59836	8.70325	7.70605	9.23177	14.1537	14.0335	10.2246	7.56038	7.4177
Mypn	9.82508	5.29837	11.8957	20.9189	8.27761	12.4575	10.6967	5.92744	11.1488	12.9727	7.9938	9.9319	23.3883	8.87697	9.50005	6.06976	7.62242	8.55782	8.91874	8.20694	8.87758	9.88195	7.03136	9.0314	4.85445	12.1342	13.499	10.3112	9.47102	8.90398
Eif3j	9.05148	9.85761	10.4958	18.2376	11.2384	5.67952	10.1671	8.99828	10.1591	11.2909	5.63891	10.051	5.28585	9.9732	8.07649	7.80021	7.46753	9.36654	10.1155	8.43942	7.45576	6.6332	10.0657	19.2025	9.83584	12.2912	13.0764	7.30392	8.41914	7.01983
LOC688712	10.9128	9.91418	9.17625	5.33704	11.7319	8.86856	5.18004	7.78933	7.70776	8.9168	6.94908	7.52633	9.1561	4.39464	8.58491	9.13978	7.10067	5.87494	5.42025	7.97885	7.9297	8.57142	8.52703	17.2425	9.15297	9.46922	9.93988	22.8637	7.69597	7.00154
Zfp106	3.97401	8.24359	3.34706	9.71363	4.40544	12.4626	11.3162	11.6916	12.5847	10.5781	5.46336	7.59779	5.31921	7.45432	7.58745	5.31873	7.05991	21.6898	6.86158	8.20694	14.9028	14.3903	10.4826	22.8418	8.8772	7.50646	4.6074	8.5674	7.60558	7.20733
Sqstm1	11.0503	9.41262	5.57173	10.4558	6.69372	7.87135	6.82293	7.51387	8.8411	9.12191	17.0494	8.5362	7.95498	8.23386	10.023	9.61411	4.69981	5.67384	8.33347	9.27722	12.0372	10.921	8.76772	7.83556	10.8251	9.12465	11.1332	9.6102	17.4012	10.2211
Pigp	4.80651	4.1595	6.17918	4.14012	3.32298	5.32012	14.5885	6.89664	8.22571	5.15831	4.80827	8.38376	10.2666	8.53593	10.7541	4.85756	7.24334	7.41107	3.34125	6.12341	6.54738	7.99038	5.87093	5.93603	6.18077	8.18688	4.42509	6.83661	19.5543	4.20275
Ndufa2	13.697	11.2341	12.6158	7.18518	20.4911	10.5036	9.30073	7.71792	6.4257	9.71157	5.30494	6.74988	8.50311	4.42387	7.34051	6.3245	7.38193	6.46971	8.55186	19.5282	8.32904	11.5106	8.61729	5.99215	5.82621	11.7591	10.3584	6.86257	6.29895	4.54574
LOC100909481	7.3158	3.49202	4.93611	7.78546	4.65218	5.21888	6.00597	6.90175	6.0821	6.01461	6.28971	8.96968	8.24096	5.63215	4.54666	4.57208	20.2381	6.45688	7.63465	4.37324	4.01971	7.05308	8.26486	5.8022	5.74304	5.45211	6.12386	7.46835	8.59993	24.5854
Fh	7.24904	7.23671	5.02863	9.44805	8.202	7.68406	18.0224	8.58	8.29751	6.56326	9.18838	4.92546	5.19052	9.35931	5.92664	7.48399	3.72561	10.6245	10.3775	6.20236	11.1069	23.9499	11.3508	5.22802	9.97591	5.09445	6.6915	6.94911	11.546	10.1662
LOC100912182	5.34057	6.84451	7.58318	21.9412	12.0224	6.48944	5.5571	8.56469	6.35903	6.61966	7.69409	6.16397	4.56137	6.40682	4.19319	5.20453	4.96476	9.24245	5.23681	19.3133	4.6604	6.75196	8.10584	6.95487	4.74501	7.22731	5.05073	4.98467	8.4438	7.90245
Scn1b	12.0163	7.91927	14.3779	3.9473	14.5296	5.88706	5.69625	5.94785	5.86672	6.7017	7.19742	6.4212	8.53171	5.1693	4.97276	5.53833	4.70389	6.99602	20.4712	7.25948	8.29832	7.95645	5.95259	3.9847	7.90544	3.57658	12.7698	10.3761	19.8172	11.3964
Idh3a	10.1471	19.3758	8.89465	12.806	10.9957	8.15482	5.49425	6.40694	6.20518	6.42994	8.60179	7.59779	7.06368	5.82704	11.5773	8.40631	6.66452	8.14705	9.08034	6.94805	9.25059	5.41598	9.88947	18.7924	8.57955	12.4003	13.0764	9.81356	5.40732	6.05946
Ywhae	5.77253	7.23671	3.53613	7.22156	5.90576	6.7071	7.86881	7.51387	7.18468	6.90168	4.7312	9.72707	5.20005	8.11205	6.71104	4.57648	15.3427	5.10902	3.97019	8.65436	8.70644	25.3241	12.3908	5.78925	9.6695	4.6452	5.1336	7.45104	5.74014	6.00916
Ndufb7	10.3199	13.0253	12.1089	21.9412	7.33046	7.75999	9.10771	6.74361	6.52826	9.85514	6.64509	6.04488	8.27909	10.0317	7.05967	6.95255	5.5232	15.6865	5.67358	7.28142	8.66255	8.24485	9.30495	9.07025	7.64718	11.7678	7.80606	4.4438	3.34876	5.0305
Ech1	7.15087	8.49248	14.0037	9.82641	12.9497	4.33304	5.7546	7.55468	5.97441	5.17882	15.7564	7.29769	8.94161	6.16321	6.52705	4.98054	3.1468	6.7778	5.27175	4.7066	11.0937	8.16003	6.18468	8.66876	7.39329	4.03892	4.12262	3.96783	7.80281	4.6372
Mgp	15.1421	9.61249	15.2106	21.5664	14.9037	12.5689	9.88876	11.4009	13.9078	9.3065	7.06041	8.12654	8.25526	9.34957	8.42996	10.0357	7.52867	9.26812	7.86177	20.3266	9.39102	12.8465	6.9669	7.37795	8.07615	14.3499	12.4673	13.2968	11.016	11.3643
LOC100912557	10.096	10.8758	15.4158	7.18518	13.1248	7.52208	17.4074	7.89135	9.8565	7.73747	7.08181	9.72707	9.79478	6.43605	9.93099	9.05633	6.75012	7.22708	4.79131	21.0986	11.8573	8.49084	11.0843	7.07575	4.21974	8.48348	7.89721	6.81497	6.42632	6.71343
LOC100365047	9.59732	14.5074	11.248	13.9047	24.2518	12.1234	11.4509	8.08009	10.4103	11.2242	8.53329	9.94619	10.4859	9.99756	11.219	5.10352	7.09252	8.38239	9.18953	8.62804	22.2269	9.05492	7.68894	8.89757	7.99736	9.00252	5.7261	6.7717	8.29998	10.6921
Ndufv3	13.697	10.4421	14.4221	17.4409	10.9718	9.39501	5.36857	6.44265	6.4257	8.08614	7.2959	6.85944	6.45359	24.7503	6.33821	8.27455	6.72974	7.0602	5.11452	6.3515	6.71853	7.82922	7.74052	9.04435	7.18756	14.1101	10.4081	7.21738	5.28816	4.84757
Arf1	8.52528	9.13356	6.56136	5.7154	4.41738	6.23634	7.81495	7.93726	5.79492	7.01961	7.039	6.82134	7.32106	6.87454	5.05991	6.2147	20.6213	17.8345	6.39861	4.90838	8.1579	4.22421	10.5642	6.80377	8.01925	5.19913	2.35342	9.14721	5.91682	6.36129
Skp1	9.33422	5.78107	5.14127	5.91185	8.77904	6.1756	8.26831	23.6588	6.20005	6.9991	7.53995	5.52566	5.15716	4.71132	5.66033	9.38573	4.94438	6.98318	6.9795	9.11493	24.4912	9.75895	12.8077	4.57182	12.1646	4.73243	3.96518	8.87894	10.5681	10.0564
LOC100361558	10.1432	9.42394	8.9912	21.6174	11.525	6.12498	6.06433	7.1721	7.11801	6.52737	8.5761	7.3215	7.44022	7.88306	8.58007	8.10326	4.45932	18.7545	7.6958	8.70261	5.54245	10.815	9.18461	6.50589	10.3042	14.2365	8.59743	10.4323	6.85776	5.12653
Ywhag	13.7088	13.7343	5.47115	8.72772	11.6364	6.98551	5.93415	7.85054	6.12313	7.28624	9.44099	9.30312	5.9007	10.7722	11.1705	19.5664	6.35066	4.38588	8.5999	7.59724	6.58688	7.46447	10.4267	8.24137	5.99255	11.9641	11.3859	12.3448	10.1161	22.3583
Ppp1cc	4.05648	3.67681	5.49529	4.60215	5.44412	8.4636	6.1137	6.27431	5.95903	8.7117	8.52472	4.86354	5.86257	6.22655	8.27502	6.40355	5.00145	20.0767	7.18041	7.07087	7.87704	4.94521	6.78638	7.15777	7.46333	6.44221	9.44682	23.9627	6.54137	8.31861
Pink1	7.84593	4.55924	7.4987	7.44712	7.74434	7.48158	4.33166	10.0899	5.77954	6.22997	8.51188	11.48	8.01695	10.2801	12.5021	6.42112	4.55307	4.41156	18.2655	8.61488	6.70536	10.1746	6.56289	8.43564	5.11709	5.26019	8.65958	7.74527	21.3334	6.32013
Ppp3ca	3.75411	6.04127	4.22003	4.43116	7.85179	7.80049	4.97356	8.40146	3.95388	5.97872	4.94956	5.4161	9.02741	4.16565	4.57571	6.35085	14.8372	5.15181	10.7968	7.79024	3.99776	9.63172	19.5468	5.9792	8.18121	4.65828	7.39172	5.95823	9.55731	10.779
Sypl2	11.926	21.9552	15.4158	13.8829	9.98885	9.7949	8.56906	8.55959	11.7898	9.07063	7.90389	9.84616	7.16854	13.3739	10.1973	10.1807	20.4175	7.85608	12.1377	8.84736	12.634	10.5308	11.1745	6.1044	13.8323	9.81815	11.0503	9.41115	7.14538	9.44361
Sod1	4.08789	5.1249	8.51649	3.96913	3.09614	8.97486	8.42093	8.31984	6.66673	8.26561	6.97049	7.77404	6.14855	10.4019	6.01864	16.6765	8.04634	5.58398	6.86594	7.027	5.28354	6.00551	4.6976	9.02277	3.11665	4.38349	9.85287	11.5141	20.7212	7.843
Tuba8	13.3946	21.9552	13.0624	7.75635	10.0167	5.61372	7.1551	6.71301	10.2206	7.12729	7.28733	5.96867	6.8921	2.73812	6.498	5.09913	8.36428	5.77225	8.77897	8.45697	6.81068	6.59503	3.85951	5.93603	6.833	4.39222	3.64614	4.21014	12.7006	5.79422
Lpl	2.41504	6.21852	9.75555	8.67678	7.64883	8.58003	8.22791	6.52937	6.43595	23.2996	7.26164	9.47937	7.38779	11.3812	11.0979	5.3319	5.09112	7.97589	6.04046	4.82942	23.4073	4.30055	3.62313	8.00393	9.87085	5.897	3.99418	9.80924	5.31281	7.97105
Txn1	11.5097	10.016	14.5911	14.3776	23.4519	11.7336	8.14263	10.5184	9.23598	12.2292	19.9395	9.69849	8.61274	10.9866	11.6596	9.65803	8.9594	9.59332	7.39443	6.33395	8.7591	11.4173	12.3522	10.374	12.0289	11.8987	9.91916	11.2934	10.2024	11.9086
Cacng1	13.3946	19.274	13.6578	13.8756	13.1964	11.5008	5.95211	7.1823	10.8411	11.014	6.28971	6.44026	8.51264	11.1425	24.6459	9.90399	10.5613	8.27114	10.3775	9.63252	12.1293	12.855	10.6588	9.34223	6.10198	10.9609	6.5962	7.72796	8.18904	10.4497
Asph	11.4626	10.4421	7.36594	8.7932	23.619	9.05079	8.6723	9.70223	8.67187	8.47583	9.65507	10.9275	8.46498	7.42996	11.4998	7.49277	7.60204	5.12614	4.61224	9.2202	9.43929	11.9177	11.527	18.1837	13.1582	14.2365	7.57817	6.28276	8.91632	8.67075
LOC100134871	4.31958	4.62712	5.48724	7.99283	9.66252	8.68127	8.2728	7.05478	8.10776	8.8604	7.57848	7.48346	9.06554	6.59683	5.05023	6.55288	6.17946	8.83167	5.71725	9.11493	10.0229	25.2223	14.4323	7.65856	12.8299	12.1342	9.16921	7.702	16.8383	4.4497
Ppp1r3a	14.0858	6.27508	9.61072	6.48303	13.1089	7.32972	9.68676	10.498	10.1744	8.2451	8.24642	9.27454	8.52694	7.77101	9.17079	6.4299	7.47975	8.90869	9.24631	9.78605	8.21933	9.7123	9.19751	17.9851	5.44976	14.3761	12.285	6.84094	7.90964	20.4787
Alpk3	5.59974	9.75956	14.2371	8.98966	11.6842	9.59748	7.29425	10.1052	9.80009	8.46045	9.23976	9.56988	10.8148	10.8745	8.39123	10.1675	7.90775	11.4204	21.0739	9.61059	10.2248	10.8956	8.88806	6.98077	5.68176	13.6128	12.8319	11.6439	7.59325	25.0061
LOC100361833	11.2073	12.52	10.2383	14.1412	7.33046	7.0007	17.8339	10.6561	8.32315	7.0555	6.05851	6.21161	9.25142	10.6309	11.4901	5.36704	7.01507	5.6396	4.66902	8.25958	7.42066	20.2177	9.04708	8.09459	9.56444	13.7873	6.20258	9.26404	4.32667	5.78964
Etfb	13.214	13.7079	15.1543	21.1844	9.91721	6.03386	5.66034	8.77894	5.02569	7.67081	6.70503	4.80637	4.40408	5.17905	8.55586	9.75466	5.62918	8.10426	8.56933	21.1512	4.99391	3.91037	7.31073	5.46546	7.88355	4.81094	7.99251	4.12793	6.66053	7.97562
Stac3	7.99122	4.42348	8.77396	10.4158	5.13371	7.30441	5.45385	9.59511	5.67697	5.77875	7.39009	8.46951	5.66239	5.25213	4.44014	6.13125	15.5587	5.83643	9.76169	10.5493	10.7163	8.5587	9.16742	7.40817	8.64958	4.79349	23.8242	7.60248	7.88498	6.77288
Phkb	23.2511	9.62003	15.2106	3.36521	11.2623	8.21557	6.28877	7.47307	9.35393	7.22984	9.30398	7.0738	4.92361	10.4263	10.4007	7.41811	9.71757	6.36274	4.61224	11.1502	5.05535	4.87736	3.60164	10.0934	7.24446	9.00252	6.89038	7.54623	12.754	6.16465
Amotl1	10.5162	22.4002	4.64646	14.1848	8.54027	8.2915	6.8364	7.34044	5.81544	9.92693	6.67078	9.75565	6.8492	8.51157	11.0301	8.40631	15.7544	7.76194	8.37715	5.45668	4.04165	8.36784	10.3579	7.51609	7.06062	6.26774	13.4493	8.1996	8.74375	7.843
Ndufb6	11.6432	8.91484	7.03606	12.2494	9.53915	5.45174	8.34911	9.02889	7.90263	7.6503	6.52092	8.31708	7.22574	24.8721	6.61905	5.64813	3.28539	9.51202	4.455	8.60172	8.34221	12.4054	9.43389	4.33438	9.84897	7.86848	4.73584	7.91402	5.08682	4.39482
Trim35	3.6952	9.20521	10.4314	9.43714	7.48169	9.04573	7.50522	10.3348	10.3539	7.96308	5.27069	9.92238	23.2215	10.6455	11.2093	8.74889	6.18761	5.81504	10.1155	10.3694	9.25059	6.43387	10.8393	4.46821	9.78769	11.6108	9.28937	10.5881	7.37959	22.8933
Hacd1	12.6367	22.4606	9.78371	14.5086	13.662	10.5998	8.57804	10.2889	9.36931	12.2292	8.43481	10.0081	8.36012	11.2351	9.94552	9.60094	10.3371	7.87748	10.2683	8.44381	14.3147	10.1703	12.7003	9.34223	25.1696	10.3328	10.8763	11.2977	8.93275	11.3918
Glo1	10.1824	7.13112	11.8957	6.0974	2.37583	10.4023	9.21993	9.37066	10.2975	10.6089	9.81778	11.0513	8.97021	13.5493	10.1828	11.2172	5.21749	18.6347	6.76112	10.6765	10.9752	9.72926	8.24767	6.29435	12.4929	8.48784	7.2467	5.98852	8.59172	19.5412
LOC100911252	14.769	14.5074	13.6014	21.9412	9.79385	12.9536	9.13016	12.2579	9.30265	11.8293	9.59941	8.81724	8.91301	10.7917	6.71104	8.75767	9.35479	10.1068	7.47305	10.3431	23.8154	10.3654	9.51125	10.374	10.1598	13.8614	11.821	13.6602	11.016	10.7287
Apobec2	13.1276	9.5333	9.45785	21.9412	13.1964	7.58282	9.28278	7.79953	6.4257	8.73734	8.96573	9.0316	7.76433	10.3094	11.0834	8.47219	8.01781	9.53769	5.37658	10.6238	8.44753	25.2223	12.7089	8.45722	8.75902	10.4288	8.68859	6.07939	7.01801	11.3918
Psmb4	3.9583	6.52397	11.7348	21.5846	8.79496	6.44894	6.82293	7.87095	7.39494	6.42482	10.3958	11.4276	6.77294	9.46163	10.8413	5.6613	4.96476	4.41156	5.4945	22.3531	4.5858	5.95037	4.11739	6.34184	4.93324	8.26103	4.23035	7.98326	5.69905	7.2119
Ndufa11	6.18092	7.23294	5.30621	12.2494	8.18608	6.28696	4.87031	6.17739	8.15905	7.71696	5.4762	9.2269	8.66517	5.47624	7.00157	6.28497	5.39276	21.6898	7.83993	8.70261	9.29886	7.31179	14.4323	6.2814	12.8299	10.0842	4.00247	4.70774	4.65128	5.0122
Capza2	4.0604	5.53972	10.5843	6.83592	6.9723	8.823	10.1042	10.549	8.54879	6.80425	5.33491	4.67776	5.80061	4.19975	6.07674	6.16638	7.34117	11.8141	4.17547	11.0537	13.4327	10.8956	8.25627	22.8418	21.7334	5.74434	10.2299	4.56495	9.5984	6.48019
Hspb8	8.88655	7.32721	5.53954	5.61717	3.75278	6.9602	7.55909	6.57528	7.65135	7.12216	5.78448	8.06937	5.08089	10.6455	11.5773	5.72718	5.20933	9.58048	6.51216	4.95224	9.43929	10.8192	6.69183	7.48587	20.2188	5.05956	10.2009	12.1804	22.0114	7.73782
Polr2m	5.10888	5.008	6.2878	7.20701	3.63737	5.54285	14.7411	6.97826	5.73338	6.50686	6.24262	8.95538	7.10181	4.29232	3.86878	6.71539	6.97023	5.55831	5.35037	5.96111	11.8836	6.51445	9.88087	5.65974	9.8621	4.37913	6.79094	6.67651	18.6626	6.47105
Rab10	13.803	8.13045	10.367	20.606	9.28843	11.6476	7.72068	11.6151	13.9078	9.93719	7.59989	5.74478	9.48974	9.1693	8.56554	11.0635	9.97029	9.52914	9.56078	7.07964	18.6767	7.34572	10.9897	9.53219	10.7069	8.04731	8.68859	12.7775	10.8927	12.1098
Csrp3	10.2256	6.50135	24.1857	7.87641	3.56972	6.02374	6.44138	6.60078	6.0821	7.21446	6.27687	6.66414	7.38303	8.0682	7.73755	8.99045	20.4827	6.01187	7.35512	8.25958	5.13873	5.27178	4.82224	5.57771	6.10198	6.08019	5.7841	6.26545	10.6914	10.6418
LOC100361457	4.73976	8.35295	3.98268	2.07006	5.21728	5.76558	7.55909	7.35064	19.3643	9.14242	6.52948	7.61208	6.17238	8.67722	5.86853	4.69067	5.8819	12.5586	4.3196	6.41291	24.4912	9.09733	8.72474	5.70291	10.7726	6.10636	7.60718	5.36977	6.53316	5.15397
Ndufa5	8.56847	5.947	7.62743	4.36568	5.4083	7.86629	5.97006	6.88644	19.0976	8.49635	4.24309	8.53143	6.96836	4.47746	5.41822	3.89571	7.32078	21.6898	4.27156	8.40433	8.66255	14.3903	8.71614	7.1146	13.04	5.12498	4.11848	7.48998	4.63895	7.10215
Ndufc1	6.0749	20.9182	14.2371	11.9474	14.5017	11.0351	9.22442	9.13601	7.34878	9.32188	8.09228	8.51714	7.14471	9.15468	10.2021	8.00224	10.2271	17.9415	7.62155	4.2241	6.36307	7.51113	8.97401	10.115	4.32479	9.67858	7.76877	4.61255	6.19623	6.27897
Tmem126a	5.23062	8.44722	7.75616	4.24562	13.3516	5.94781	5.30124	6.83543	7.59494	6.18382	6.7821	7.40725	7.03985	7.25943	4.90013	6.55288	6.19984	7.09016	7.07559	5.54002	6.2402	5.20817	10.3579	21.9396	7.34952	10.4026	23.7123	11.0727	7.82335	5.37349
LOC100363269	10.0843	3.26576	9.132	6.01372	11.8195	9.78984	10.3242	8.0954	10.2719	8.06563	8.47763	5.31607	8.39825	9.33495	7.85376	8.80598	6.44033	9.84577	10.823	7.71567	10.9708	5.91644	10.2032	10.3611	17.7807	4.62775	5.1046	7.77123	7.83979	21.8278
LOC100362453	13.587	3.60138	13.5572	8.17473	13.1805	5.77064	3.46982	7.81994	8.10776	6.12742	6.62368	18.3728	6.18668	8.3654	8.68175	6.79444	9.5586	5.51124	7.44684	6.68487	9.75964	4.52534	8.22618	9.0055	8.44823	5.46083	4.02318	5.04092	20.3432	11.4467
Acta2	13.697	13.7079	15.4158	9.86643	24.415	9.41019	7.6758	9.63082	7.21545	8.37841	8.71312	8.28849	9.5231	9.04262	9.10785	10.1368	7.21888	18.7973	10.2727	10.7993	9.78158	5.87403	9.07287	5.50432	8.81154	11.7591	10.3584	9.24673	8.93275	8.76678
Myom1	5.72933	3.7296	9.38946	4.69674	4.57258	10.3618	8.42093	7.88625	6.91801	11.2293	5.03948	10.0415	9.57077	7.16686	4.80813	8.06813	8.99201	16.1786	6.33309	4.76801	10.1765	6.612	11.1015	8.72057	9.34995	7.66348	10.2548	8.49384	21.1115	7.22105
Psmb7	6.90347	5.92814	4.06314	5.80271	6.68576	6.68179	8.97754	6.00906	9.72829	9.81412	6.46098	7.58826	4.5852	10.4019	10.0085	4.90148	15.7421	4.80094	4.97475	23.2654	7.49526	8.00734	8.08435	6.23823	7.63842	5.25583	3.84502	4.2837	6.03598	6.38873
Atp5i	12.6799	9.5333	6.91538	21.5664	13.3158	5.94275	8.04387	8.98298	8.18982	5.4916	5.63034	4.96833	5.08566	9.87088	20.9563	8.56003	6.583	6.61092	6.16275	10.001	7.37677	6.71379	10.8264	5.84537	6.82862	6.43785	5.05902	7.11354	5.05806	6.74087
Ppp1r2	12.5229	8.71874	13.2313	13.0679	6.90862	12.9536	11.7516	8.30454	9.64624	12.9727	10.1089	9.94619	11.9968	11.313	10.7202	9.39012	7.54905	7.87748	6.98387	8.34731	9.97466	11.7099	23.0797	7.6931	12.1514	14.3063	14.1081	10.679	16.2713	6.81404
Prkar2a	14.5845	8.14931	14.1606	15.7164	11.9667	8.84831	7.98103	6.44265	8.67187	9.77823	8.7174	12.5614	25.9049	7.17174	10.299	10.1499	6.40772	5.42138	8.29416	9.83868	10.1107	10.2297	12.7089	6.82967	7.86604	13.1112	10.5531	11.315	7.57271	12.4299
Rbfox1	11.4862	7.01798	4.61025	11.2052	14.1356	6.08954	6.69276	8.78404	8.33854	7.25548	8.11797	6.08299	8.52694	6.21193	8.25081	5.20014	8.39689	21.5914	9.51711	8.36047	8.22372	8.85558	6.79068	8.68603	12.9919	21.9393	6.00785	8.66692	6.29073	4.74696
Dld	5.33664	8.12668	6.92342	3.68536	8.30547	11.1515	6.49525	7.42205	12.2565	11.8139	9.71502	4.65871	4.75202	4.1559	9.02069	9.52188	5.61695	7.65069	20.0562	6.89103	11.4755	9.61051	8.17461	18.2225	11.775	9.9839	9.38053	8.64961	7.9836	5.7805
Pebp1	7.5946	4.56301	7.3579	4.31474	8.58802	6.50462	8.13365	7.97297	6.42057	8.70657	5.65603	5.63046	6.01509	11.2107	24.7815	5.12548	5.19303	5.37431	11.9062	5.79443	10.4574	6.04368	6.63166	6.16915	3.98774	8.84114	3.76215	4.26206	6.77558	6.95581
RGD1560568	7.97944	12.569	6.32401	21.9412	7.33046	9.61267	9.17056	9.5441	8.61546	6.90168	7.21883	5.84958	5.8864	8.91108	10.6476	7.51034	4.68758	6.54673	7.15858	18.4799	3.6072	9.70806	9.57572	4.42072	5.69051	8.36135	4.32565	5.46063	5.01286	6.27897
Eif5a	10.9246	11.2944	6.93549	6.14105	12.4483	10.6099	17.6678	7.52408	7.0975	10.532	3.40818	10.7798	6.83013	11.0792	11.7129	9.36377	5.65771	21.0009	8.1413	9.20704	14.9028	8.24909	12.0986	8.03846	13.8017	12.1517	4.96372	8.19095	8.95741	11.3689
LOC294154	11.5647	7.20277	12.5837	10.3685	8.58006	9.77971	5.17555	7.29453	9.41034	9.91668	21.7036	9.55082	7.55938	4.29232	8.07649	11.2567	5.38461	9.40505	10.8623	6.66732	13.4195	6.53566	10.6029	5.41366	8.83343	7.73327	11.6096	10.3761	21.1115	6.99239
LOC100365697	12.3226	13.4213	9.52624	21.6174	12.886	11.6678	5.89824	8.22292	8.26674	11.3934	10.5457	12.0278	11.1484	11.2935	7.97965	7.78704	7.29225	10.3464	7.80499	10.6721	5.81453	7.09973	23.243	9.41131	8.60143	7.90337	13.6855	13.0198	7.74939	7.42684
Myf6	9.27139	3.81256	11.4854	12.8678	10.4186	7.1728	6.04188	23.4955	6.23595	6.51711	9.4624	7.936	7.47835	7.71741	6.3721	7.93197	10.2678	4.5656	8.21555	7.027	11.8441	6.78164	8.25197	6.85558	8.18996	13.6041	7.40001	12.7472	4.12534	21.3705
Akr1a1	11.5097	21.9552	12.7808	11.4308	7.35036	7.66381	9.18402	7.84544	7.74366	8.11178	8.40912	6.35451	8.38872	25.7442	8.75922	5.67887	5.14411	5.20316	4.98349	9.6062	6.86773	5.47112	7.65026	7.40385	8.9166	11.5541	8.99519	5.23996	6.11405	6.26526
Got1	7.77917	6.2072	10.0492	9.0515	7.25485	5.76558	4.79849	5.87133	6.93339	8.99372	5.31778	8.05508	12.3066	6.92326	25.7257	5.75793	20.2381	7.25703	5.70415	4.97417	4.26984	6.72651	9.52844	7.38658	5.86999	10.865	10.3252	4.42216	6.33593	5.77135
Tob1	7.51999	20.2696	6.15505	10.9178	11.517	5.42643	8.00348	9.75834	10.4924	5.6403	9.4153	8.5743	7.57845	10.2558	6.45442	7.93636	7.14143	7.09443	4.74327	6.74628	7.57864	25.3241	6.72191	7.24843	9.70452	14.1537	11.6345	8.25153	9.71345	6.38416
Tp53inp2	6.65215	11.4867	13.9796	12.7441	8.50843	5.90731	5.86233	6.48856	5.29235	6.38892	8.5761	6.37833	23.2215	7.76126	7.92639	7.58061	8.5314	4.39872	6.85721	6.88664	12.5111	7.95221	8.66027	8.3752	8.83781	8.40061	5.04245	11.7044	8.263	21.5351
Sod2	6.96238	4.44988	5.5154	7.37072	4.31391	8.1447	6.33365	7.56999	8.65649	7.74772	7.61274	8.33613	8.14564	5.04263	6.50768	7.08871	7.73248	13.0977	6.80916	4.88206	3.95827	3.71103	4.43543	18.5895	4.93762	8.01678	7.01882	4.50437	4.86905	3.16007
Mss51	9.30673	8.93747	9.90037	16.9097	11.4693	8.75214	5.29226	7.98827	7.54878	5.86591	8.6232	8.51714	9.06077	7.89768	6.7982	6.22348	17.3848	9.42216	5.73036	8.20256	7.07837	9.84377	10.9596	7.20094	9.74391	13.1112	7.38758	12.1242	9.55731	10.3262
Fhl3	10.6458	13.9869	7.9211	6.39572	13.3516	10.4884	6.79151	9.02889	8.35905	10.2961	5.00522	10.7512	10.4382	7.27405	11.34	11.2787	8.60885	8.55782	19.9034	9.53602	11.7212	9.6402	9.33504	9.0314	11.9588	12.0906	9.32252	7.23902	8.78073	19.6189
Zfand5	11.062	8.39443	6.32803	21.1844	11.8593	9.38488	6.29774	17.0784	6.6975	5.85566	5.34775	9.81282	8.76049	8.58952	5.55864	7.75629	8.68222	6.49539	8.86633	9.08861	6.75363	6.90888	7.64596	9.60989	5.97504	13.2377	12.9562	8.90057	6.43043	10.9208
Morf4l2	5.05391	5.76221	4.01888	3.75448	7.28669	8.09914	7.06532	9.61551	8.15392	6.84527	6.38819	5.35418	4.33735	5.11571	4.62413	5.94239	10.0029	8.36099	4.76947	4.18901	24.342	8.16003	10.6201	22.6864	14.3445	4.7019	6.48847	5.5515	7.01801	7.68751
Ndufs8	11.0817	8.6848	12.825	12.3985	7.56924	6.92983	17.4074	6.76402	7.8052	7.66055	5.7802	8.67434	8.93208	10.8794	9.44195	7.28635	7.67949	5.52835	6.84411	10.0712	7.08715	20.6545	8.92244	7.88305	7.30137	11.5061	8.66373	10.4107	5.18954	4.55489
Tceb2	8.46637	18.0823	8.11018	6.75225	7.28271	5.7099	6.73315	6.85584	5.81031	6.37867	7.51426	3.09628	8.67947	4.78441	7.98934	7.10627	6.28136	4.91647	5.14072	6.21991	7.60936	5.6959	7.34941	7.04121	4.07966	8.6972	4.63226	4.50437	19.5009	7.30794
Hibadh	8.46637	11.8676	12.2015	5.85728	13.3158	7.75999	8.85634	6.63139	5.40005	7.58364	7.92958	8.13606	5.38594	9.60779	10.0569	8.76645	7.29225	7.83469	5.68231	4.11005	5.60828	9.55537	8.12303	7.51178	4.9989	24.7133	11.2409	4.90245	16.6328	4.87501
Fxyd1	14.4706	12.569	13.2313	18.7833	11.7717	7.58282	5.9566	7.1466	7.7693	7.78362	6.09276	7.71211	6.22958	5.91961	10.4927	6.77687	7.63057	19.6488	6.08413	8.6719	9.72453	11.0355	12.1759	8.23273	6.68854	11.6675	13.2918	8.33374	4.83207	5.59757
Cul3	11.5883	11.7054	6.40044	14.1412	11.1708	11.2123	7.17305	11.6151	12.2565	7.37854	9.14556	9.64133	23.3883	7.03045	9.39353	9.40769	6.83165	8.73754	9.27689	7.36476	9.82985	9.65292	12.7089	5.53886	8.91222	14.2583	9.67056	7.18277	18.7777	10.3354
G0s2	13.697	11.4565	10.3751	15.7164	10.4783	11.273	7.31669	12.2579	10.5847	12.2087	8.23785	8.49809	10.3953	7.24482	10.1682	8.06813	5.32347	7.44531	9.86215	9.14563	8.24566	9.25849	9.21899	8.33203	19.3478	14.4415	12.5792	11.791	5.80999	8.11282
Rps10l1	8.66665	9.68414	8.34351	21.9412	6.02913	8.66608	7.89126	8.00358	5.2821	10.1936	6.44813	5.94009	8.25526	10.9915	26.3939	4.57208	4.67943	10.1068	4.7389	7.07087	7.15297	4.91128	5.71621	7.1146	7.59465	7.34072	4.5411	5.68131	6.15925	5.04879
Bsg	7.45324	9.78219	4.9522	4.76586	7.99506	6.44894	17.605	6.00906	6.318	6.77349	6.18695	6.79275	5.9579	10.0317	7.49061	4.27343	4.94846	13.102	5.75656	7.29457	12.4628	9.82257	8.82789	7.83988	6.05383	7.8205	3.95689	8.33374	4.63895	6.31556
Txlnb	14.4942	3.85028	8.69752	7.38891	12.8979	11.03	6.87679	6.85584	7.52314	7.75285	9.37249	11.218	11.1151	12.8088	8.33796	10.0841	2.89407	7.87748	6.78296	4.2548	9.66748	13.2961	24.7172	4.73156	13.3771	12.3174	10.2921	12.704	15.3344	7.50459
Slc2a4	11.1681	8.53396	9.95267	11.9947	5.54361	6.48944	5.19351	7.80974	6.45647	8.77323	5.96431	8.56478	8.50311	5.62241	6.49315	20.4316	7.65503	4.98065	9.3555	6.1585	7.97359	8.06672	6.10732	7.4168	8.83343	11.07	10.9757	13.6602	7.74939	24.5534
RGD1306148	8.9376	6.89731	11.1716	12.4531	13.4073	9.24821	8.25934	10.8398	11.6155	11.8139	7.77116	8.59812	8.81769	10.933	11.064	9.36377	4.93623	6.42265	9.18517	9.44391	9.85179	7.97342	20.9909	5.37049	9.97153	10.612	12.1731	9.17317	20.3432	7.67837
Ddx5	4.94003	5.83764	7.5872	4.32202	5.88984	12.1841	10.3062	9.5288	8.87187	11.2242	5.53186	8.31231	7.00172	9.35931	11.432	3.97038	7.43084	7.97161	5.20187	4.36446	12.0416	9.59355	7.69754	9.07889	24.154	6.67774	4.81871	6.2092	20.6678	5.72562
Pdlim7	22.7131	9.5333	12.5394	12.6859	15.5165	8.76732	8.56457	7.93216	7.19494	8.9168	6.73928	8.28373	7.10658	10.6602	9.93099	6.59241	7.39823	7.27843	7.11927	10.115	6.71853	9.82681	8.56571	4.74019	8.1243	9.46486	7.66104	4.30533	14.5373	5.69818
Mrpl54	7.13516	8.82433	12.6158	8.93509	3.91197	8.32693	9.30073	6.7028	5.06158	8.99884	6.41388	5.43992	6.69668	3.15712	7.40345	5.63056	6.32213	6.49967	11.9062	7.83849	5.57756	4.53382	4.80075	7.29592	5.06894	3.58531	5.62251	5.32217	19.5543	7.11587
Ank1	7.15087	7.7458	5.64816	4.85682	8.69945	8.91412	4.96458	7.68221	22.8874	8.3015	5.57468	10.2511	9.70422	12.3654	12.0518	6.41234	6.95801	21.5914	7.80499	9.63252	12.0108	13.7329	14.8836	8.06005	8.65834	9.4256	10.3542	7.99191	7.1988	4.38111
Tead1	8.44281	5.90552	11.9199	6.00644	7.29464	5.84657	6.44138	23.0007	7.36417	5.52237	7.80113	6.87373	7.65947	4.53593	5.39401	11.674	4.24328	13.3374	6.39424	10.0405	16.3202	8.8471	12.8077	4.64953	22.1843	6.71263	10.1636	10.3674	7.46588	6.23324
Cd164	7.64565	17.6336	7.30962	9.96466	4.68401	24.7226	7.02941	5.60097	7.21545	3.95334	6.21693	7.53586	4.64239	5.36419	4.49824	7.50156	7.14551	5.69095	7.5604	7.55337	6.76241	4.22845	6.56719	4.14875	6.78922	5.12062	5.14189	5.40871	6.60712	8.23172
Tubb4b	14.4706	21.0464	12.7204	7.54171	10.0167	5.48211	8.56457	10.0287	7.71289	6.39405	5.43767	4.01087	7.77863	5.61754	24.1375	5.84138	6.79088	9.03278	7.61718	5.85584	5.43275	7.40934	9.86368	9.41131	9.45063	5.8054	11.0337	4.51303	7.77404	4.37196
Usp25	11.3801	11.4	10.8618	6.27202	13.5466	10.4175	8.25036	6.29982	8.44623	9.33214	7.59989	9.00302	10.4239	11.4153	12.5021	6.38159	5.91859	10.3507	8.24612	7.6411	14.9028	10.1703	26.1398	8.97096	12.4316	21.0757	10.781	8.64528	5.29227	8.94514
Tmod1	14.769	7.13489	13.6578	7.5599	12.9178	9.63798	17.8339	9.00339	8.20007	8.78862	8.02805	7.7264	10.1475	8.50182	9.32089	9.5087	6.45664	7.80045	9.6263	10.2685	10.4705	9.41542	10.2978	22.4015	9.20988	14.2583	7.61546	10.6616	10.5681	10.6921
Etfa	15.1421	13.4062	10.1739	9.88826	24.8289	6.08954	7.88677	6.79972	8.42572	5.78387	5.56184	10.9942	7.20667	10.5822	7.54387	4.14606	7.4716	7.27843	6.80916	4.49605	7.07837	9.78016	6.64455	18.4039	7.75661	5.8054	6.62106	5.8241	7.17414	5.35519
Fitm1	22.7131	9.5333	12.8572	14.3776	15.3693	8.6104	8.18303	7.19251	7.89751	7.61441	6.17839	6.37357	6.65855	21.6419	9.17563	6.71539	9.54637	5.661	5.58186	9.80359	8.85125	8.33392	8.3981	10.0114	6.15013	14.3369	10.8266	12.1934	4.32257	6.96038
Ube2g1	15.1421	12.8556	15.1543	21.2026	10.2953	13.2522	10.3197	8.6004	11.5181	14.0238	9.17981	10.1606	20.6239	10.475	8.71564	9.75905	7.76509	9.55481	11.714	7.4481	10.6066	9.3518	5.1102	7.11892	12.1208	12.5224	13.6647	13.2968	11.1146	12.2515
Nedd8	13.1512	21.9552	10.1739	6.91596	15.5205	6.80834	8.37604	6.73851	5.97954	6.4402	8.833	7.52157	7.03985	7.89281	4.60961	5.70083	7.37377	7.23992	6.12781	8.81665	7.68396	5.61108	6.91532	6.7347	6.0013	10.9566	5.98713	4.61255	13.5635	7.39483
Sgcb	10.312	5.05702	21.8082	5.20607	7.1275	6.68179	5.57056	6.2182	6.36929	6.8863	7.30018	4.79208	9.1132	7.08404	6.10095	7.52352	7.50014	20.787	6.71744	7.1893	4.95003	5.84434	8.26486	9.06162	9.04792	7.09646	8.73416	11.2718	6.88241	7.03812
Immt	8.95331	4.26509	8.17455	8.37119	13.1805	7.02094	17.2818	7.03947	5.76415	7.99897	7.74119	6.02107	5.39547	7.31303	9.24342	8.16036	7.79362	7.9331	11.0414	18.6115	6.08222	6.12002	3.83802	5.31005	5.65987	5.87519	6.06171	4.07168	5.72781	5.24544
Dbi	8.94938	6.41461	22.3714	4.50029	5.26504	6.68685	7.46033	7.72302	6.50262	7.41956	8.74309	6.33069	9.33245	6.28014	8.16365	8.03738	11.1035	4.67685	4.76074	5.1891	9.57971	8.04976	5.26493	21.3956	7.94921	4.11743	5.01344	5.97554	4.96355	5.92684
Kpna3	13.9719	12.339	15.1543	20.606	11.6046	9.95688	8.64537	10.146	10.795	10.25	8.28495	9.54606	24.027	10.5237	9.26763	9.53066	7.75693	5.08763	7.11927	8.6719	12.261	11.2137	7.79639	8.0212	12.0201	8.20869	12.9521	8.0871	9.86958	9.7866
Hspd1	4.58268	4.46496	5.78896	7.0251	4.09503	6.18572	5.38652	7.97807	9.60521	21.1152	5.06517	4.53485	7.07798	5.90986	6.48831	5.70522	20.4419	5.02344	5.94437	7.17614	4.57702	5.047	4.18186	5.5993	4.2854	6.72572	4.856	5.09717	5.37444	4.843
Phka1	13.0923	12.1165	8.47626	20.1658	7.78016	6.81847	6.40099	5.18779	6.54878	7.51186	9.16697	8.92204	10.6432	8.43848	8.77859	5.09473	6.5993	6.0675	6.86594	8.49206	6.22703	6.9725	5.7248	20.5797	6.28145	4.31807	12.7615	10.9992	5.55524	5.57928
Akr1b1	14.1761	12.3201	15.4158	12.6204	7.35036	13.0194	17.8339	9.38086	9.03085	9.57826	9.90769	6.52123	7.13518	10.3386	10.0375	4.76972	5.09928	11.2707	6.27631	10.0098	25.3689	14.3734	10.7705	7.07143	8.8772	10.3503	4.24278	7.63277	4.67182	8.08995
Ola1	6.58539	21.9552	10.9705	7.78546	6.18831	6.03386	5.52568	9.13091	8.21033	6.90168	4.87678	5.61141	4.83305	7.97563	6.51252	7.71237	17.2544	6.67938	7.62591	8.1236	8.5704	9.1567	7.30643	5.60361	4.92448	4.31807	9.98545	5.23563	6.72627	6.72715
Rab12	9.84471	13.4665	13.69	10.3685	24.2518	12.2753	10.2164	10.7428	12.4616	14.0238	9.21835	11.218	25.9049	7.40073	9.14174	9.4033	9.97029	10.171	9.56515	8.48329	9.93956	12.4309	12.8593	9.4847	9.99342	10.5771	13.3913	13.7468	9.76275	10.6372
Nek7	19.6148	10.7325	8.4119	11.7	10.737	9.71391	12.0479	8.81465	11.5796	12.3574	8.07515	9.45079	7.85489	8.63337	9.195	10.4837	7.37377	8.0957	9.34677	9.5755	9.30325	12.2528	23.243	5.99215	12.0201	10.6861	10.7313	11.7391	5.49771	10.7241
Dnajc15	10.2335	10.0009	9.78371	12.6859	24.415	8.76226	9.08976	6.78952	8.18982	8.06563	6.79923	7.04998	7.50218	8.40438	8.59943	6.9833	7.85069	17.4622	8.19371	5.02681	11.5237	10.6793	11.8966	7.542	5.24403	9.36454	8.29911	9.44577	4.78687	6.28812
Ptges3	8.29752	10.6269	4.38899	7.71997	3.53788	7.22342	7.21794	6.59568	6.12826	7.16831	4.23453	5.73049	7.04938	7.21071	5.47149	9.74148	17.2544	7.24848	6.31562	5.31192	6.76241	3.99519	2.75066	5.27551	6.36024	11.5803	4.11434	7.29959	5.47306	14.0945
Cpt1b	24.2407	9.83121	13.5572	4.94413	10.0167	6.29708	5.36857	5.94785	6.47185	9.80387	9.43671	8.12177	7.53078	8.68209	8.07649	6.52653	7.23111	4.92075	22.4148	5.91286	7.35922	5.29299	4.65892	7.15777	6.55722	9.39507	4.6364	6.61161	7.8439	5.07623
Laptm4a	8.89441	11.9128	13.7463	4.44571	11.3141	5.78076	8.17854	7.23842	8.15905	6.41969	5.39913	7.75022	8.12181	9.50547	6.34305	8.8543	19.3495	12.5586	8.04521	7.61039	24.1314	8.71138	13.1043	9.13933	11.2322	7.53699	7.94279	10.7266	4.19108	4.52745
Cops9	8.80409	9.83875	7.21709	12.3585	21.3347	5.68965	9.30073	6.83543	5.87185	5.75311	7.77544	7.36914	7.6976	8.76004	8.78827	5.17818	7.45937	5.48556	6.62572	19.3133	8.46508	7.84618	8.06286	6.44977	9.91463	5.55243	5.04245	4.94572	4.0144	7.63264
Atp1b2	13.8737	12.8745	4.72692	10.1466	14.3067	9.77971	6.25734	6.55487	6.85134	8.27073	9.68076	8.12654	7.04938	11.4738	11.0108	5.74036	7.87922	10.3764	6.36366	9.286	6.7668	11.8923	12.3865	18.1319	9.07856	24.3557	7.61961	9.26836	4.88959	7.30794
Smdt1	8.7177	8.79416	8.79407	5.87184	5.79831	7.13231	8.09325	8.54429	8.48213	6.45558	5.12083	6.39262	6.77294	5.68087	8.41059	10.2378	4.76503	20.5088	4.22352	9.77289	11.1639	12.0365	5.33369	8.14207	10.1247	4.74988	6.40975	5.76352	4.69237	17.2272
Vcp	3.37713	17.6675	4.14762	7.23247	11.0793	7.1728	5.97904	6.55487	6.83596	18.2336	5.55327	5.03979	2.93129	5.52497	8.24597	6.33328	5.90228	5.75941	6.63009	4.64519	4.16891	7.82073	5.74199	5.46546	5.76055	7.45412	6.64178	6.92748	10.0339	7.43142
Ghitm	4.56697	3.48448	4.2683	5.03144	5.28096	5.65421	8.44338	12.2426	11.3232	11.2345	9.87344	10.2939	10.5622	4.35079	7.59713	8.30969	21.0656	5.10046	8.64794	4.4478	4.08992	6.29391	4.87812	7.01531	5.83497	5.87083	22.7014	10.5751	3.94044	7.52745
Prrc2c	13.4457	3.77862	9.92853	6.61036	4.76759	9.51143	5.80847	7.33024	8.23084	6.86066	5.02663	8.42187	20.1329	8.78928	7.51482	7.69041	4.67536	6.74784	6.85721	3.81178	5.21772	7.85466	8.11443	5.72881	5.39286	20.1205	10.1429	9.77462	5.7237	5.15855
Timm17a	8.27003	5.76221	5.31426	5.62445	5.61524	7.33985	6.57605	7.23331	5.49236	8.51173	9.04708	9.00778	8.46498	9.49086	9.18532	5.29237	20.4419	4.24468	4.69085	4.20655	13.7969	11.1246	11.8966	6.7606	9.05667	10.3634	12.9645	8.11306	22.0114	13.1662
Srp14	7.93232	11.6112	8.62913	12.3585	17.9839	6.21103	8.12018	6.02436	7.20006	6.17357	19.4728	12.0326	6.3678	11.274	6.72073	10.5979	8.36428	6.55529	9.07597	10.0624	7.24074	10.9083	6.70472	8.10754	2.34187	4.96796	9.6167	11.4621	9.95587	12.3979
Fem1a	5.25418	4.0426	3.72521	6.25019	5.88586	6.98551	15.2798	3.72378	5.9898	7.31701	6.78638	6.526	7.22574	4.37515	4.74034	8.67422	5.36423	7.20141	8.90564	4.63203	8.34659	8.81741	7.86516	4.29984	2.56949	6.01913	5.90841	7.1395	17.6354	8.48325
Dnajc19	8.09725	6.77664	9.1843	12.3985	12.6632	6.87921	9.30073	6.17229	5.83595	7.2401	21.1042	6.02107	7.26863	11.2643	11.1899	7.51034	8.02596	5.0106	6.02299	6.95244	5.49418	5.30996	6.18898	7.33477	7.23133	24.2902	3.84502	6.99238	5.09093	5.73934
LOC100909788	9.34207	7.30836	6.61366	11.5472	7.01209	7.2133	7.43789	12.2426	10.2975	9.80387	10.1175	5.48279	12.5259	11.4543	10.8171	9.65803	10.2964	9.02422	8.93621	10.4659	9.39979	11.9304	10.6889	10.387	19.8249	9.53464	22.5356	8.0871	7.10429	9.65855
Cacna2d1	7.06447	18.8856	13.7543	12.1584	14.4301	13.2522	11.6528	7.6516	11.1437	12.26	8.61892	9.06971	7.10658	8.61875	5.24391	8.67422	9.16729	9.26812	9.55205	22.0592	10.9796	11.7226	9.64019	10.3222	11.2103	10.9435	13.6855	12.8165	7.11662	8.56099
Higd1a	10.6929	11.6526	9.40556	21.279	15.4966	10.8427	8.56008	10.0032	10.4155	8.38354	6.2469	8.3266	8.98451	10.0658	9.70341	8.22624	6.20799	10.4534	9.45159	23.2654	9.29447	12.9271	10.2333	8.26727	11.311	14.1101	7.88064	8.90923	7.81102	9.99697
Nudt4	9.84471	11.1662	14.7802	8.79684	24.8289	11.4451	7.62642	7.90155	8.43597	12.26	9.74499	11.2085	11.9301	11.3666	10.7009	9.72831	9.24473	5.05767	18.9687	10.6326	9.5841	9.69957	5.70761	10.0632	11.7531	12.4003	9.1485	11.9424	8.62048	10.7744
Ddx1	12.9784	11.8563	7.89294	12.1693	13.3516	6.79822	8.84736	7.47817	9.32316	7.8554	7.28733	9.45555	9.70422	7.7369	6.49315	8.98166	7.6428	20.6928	8.84886	7.32967	9.32519	10.0261	6.26204	7.79239	9.41999	14.2365	12.1358	7.60248	18.9955	8.4238
LOC100359937	5.1403	11.1096	6.56538	8.06923	7.56924	6.07436	7.64437	8.56979	9.44624	6.12229	6.48667	7.85978	8.89872	6.17783	4.71613	5.68765	20.4419	5.0919	4.60787	4.82942	4.12503	7.29059	8.41099	6.79514	9.6695	6.23285	3.99004	4.81592	18.6626	4.10214
Uqcc2	10.3238	11.679	12.6158	7.18518	20.4911	6.74254	9.30073	7.79443	6.93852	6.18382	8.57182	11.2133	7.15424	10.6845	11.3691	8.91139	5.14819	6.3713	8.93621	6.26377	5.70921	6.81557	8.42818	7.38226	7.31012	6.83912	3.98589	5.22265	19.8172	4.60062
Hhatl	13.1276	9.08077	13.9675	14.2321	23.4519	11.6121	8.52866	9.51859	12.8309	9.38854	8.22501	9.59846	7.02555	11.6248	10.3716	10.1631	20.5724	9.04134	10.1373	10.523	11.0015	10.4545	9.22759	6.41955	9.21863	11.7111	12.7615	10.7179	9.86958	11.3643
Ifi27	14.1761	21.5706	15.3876	9.34983	12.9935	12.2753	8.18303	7.86585	12.5847	12.2292	8.25926	10.0272	8.32199	9.75395	10.0569	8.59956	8.3439	8.05719	8.33784	8.53154	12.9017	14.3734	24.7172	7.83124	12.0201	14.3761	11.4936	11.1203	7.11662	9.63111
Ubr3	11.5608	9.97828	13.1227	21.279	7.56924	11.6324	8.97754	7.04968	11.1488	11.1268	7.04328	10.6655	11.7156	9.96832	9.19016	10.5628	7.52867	10.6973	9.52147	9.48339	10.7119	23.5173	6.71762	8.32771	10.6938	11.4145	11.8251	8.37268	7.56449	10.4772
Cav1	10.4063	12.9235	21.43	13.9993	15.3693	12.2601	11.6528	11.2989	11.9693	14.0238	7.48001	9.93667	9.83768	11.1084	10.5072	10.0489	7.64688	8.69475	22.7904	5.45229	10.6022	11.8923	10.1216	7.65856	11.7575	12.2302	13.3913	7.73662	9.72166	9.68599
Pdk2	9.88791	6.66727	7.65961	5.24973	7.97914	6.48438	6.84088	9.16152	5.52825	6.81451	8.37487	8.25515	7.38303	5.80268	5.23423	5.50758	5.40499	4.69824	22.4148	9.09738	5.9023	10.8913	8.32073	5.35322	6.94243	8.32646	9.91502	10.8131	16.0329	8.97258
RGD1303003	11.4783	14.0888	9.50613	12.3658	20.4911	10.868	5.79051	5.93764	10.0155	11.2447	6.42673	7.84549	6.40593	4.48234	8.5607	10.8175	6.2406	7.99301	10.3164	20.8266	8.41242	8.52053	7.34511	8.78964	8.96475	11.5803	7.64861	6.52939	4.74989	4.50458
Hspb7	8.07761	4.07277	4.99645	4.08191	4.30197	5.39099	6.93964	5.96315	6.16416	7.51186	6.20408	5.93056	4.85688	5.30572	5.94116	22.5618	8.31537	5.13897	5.68668	4.58817	4.51998	4.74588	3.97986	10.2359	7.62091	6.77806	3.90717	4.13658	21.3334	8.11739
Ddx3x	12.3422	8.84696	14.3578	10.3212	14.9037	11.025	11.7516	8.88096	13.9078	9.34239	7.44575	9.53177	9.35152	9.31059	10.5411	9.70635	7.29633	18.9941	4.9136	8.11483	9.64993	9.6402	7.45256	8.70762	11.9588	11.7373	13.1758	6.87988	10.9995	25.0061
Rnasek	4.78688	5.45676	5.21369	3.3834	7.1474	5.35556	6.0733	7.60059	5.80518	6.57352	4.89818	4.9207	5.40977	4.5067	2.99237	9.11342	6.1387	5.16465	22.6594	5.11892	6.52544	5.15303	4.54718	6.02669	4.33355	4.4969	4.17234	5.46929	20.0473	9.64941
Amfr	9.07112	6.63711	12.8492	6.71223	10.8882	9.84046	7.65784	10.8398	9.34367	11.3062	9.10703	9.26978	20.8574	10.4263	10.236	5.79306	8.98386	6.17875	8.86196	8.81665	9.95272	8.71562	9.64449	8.77237	10.6631	9.29475	13.6855	11.1419	7.37548	19.3628
Ppp1ca	18.8687	10.2724	11.2118	11.3544	7.75628	9.70885	8.86532	6.662	9.44111	10.5884	5.78876	8.09795	8.15994	8.41412	6.15421	9.10903	2.9063	6.64943	8.27233	3.7065	12.182	10.8192	10.6545	6.66131	9.23614	6.79114	3.93617	9.69673	4.41707	14.5701
Smtnl2	9.10253	2.32299	7.46249	8.73135	9.30833	6.62611	7.42891	6.14169	7.70776	6.3838	5.37773	9.53177	6.65855	7.95615	7.73755	7.34784	15.628	4.53137	4.96165	6.27254	13.7969	10.1703	26.1398	4.65816	11.4598	9.39071	7.5616	4.6688	6.5085	4.69665
Ahnak	10.6419	3.66172	9.79578	6.6904	9.05762	6.58055	8.75759	11.6916	9.12829	8.76811	5.30494	10.5369	9.05124	11.1864	21.4066	9.35498	7.05991	10.5732	4.5773	5.84268	10.8655	6.59079	9.90666	9.91209	8.43072	8.21305	8.80046	5.78948	15.8028	7.85215
Ubac1	12.7388	12.2334	8.7458	4.61307	11.7598	8.35224	7.02941	6.81503	5.74877	7.37341	5.85727	5.79718	5.27155	8.56029	11.4611	5.1123	4.121	6.38841	7.32891	5.10138	8.42558	5.047	8.1875	6.29867	5.47603	10.1017	3.77044	6.72411	13.0006	6.24239
Rbx1	7.25297	22.4002	7.1648	8.53126	10.2953	5.67952	5.45385	7.50367	4.97953	5.94795	6.14842	6.69748	7.18284	6.52862	4.80329	6.55727	7.01915	6.81203	6.08413	18.4623	5.66972	3.93157	5.40676	9.89914	5.02954	6.92636	3.79116	9.04336	3.20084	6.64483
Rab1a	10.9874	6.05636	8.10213	6.08284	12.5199	5.72508	4.89276	7.46796	8.06674	5.77875	9.93338	9.42697	5.20005	5.4665	7.95544	21.332	5.5232	8.68619	6.36366	10.4659	9.0575	9.38573	5.03284	4.87834	7.62091	4.68881	18.9268	11.9295	8.29587	12.5076
Rab7a	13.803	9.29195	14.7802	10.6777	11.3141	9.46081	5.72767	6.90175	10.0155	9.12191	8.49903	8.379	8.7176	8.69183	7.84408	6.89546	7.41046	20.573	8.13693	8.93509	7.42943	6.14971	4.87812	8.71193	6.77171	12.5137	6.34346	12.3838	21.1115	11.6387
Rab2a	9.58554	6.56923	10.5078	7.00691	7.02005	8.45348	7.8733	8.06479	7.97956	6.96321	8.01093	8.47903	8.31722	9.67113	9.00616	9.21883	21.6281	9.45211	9.07597	10.83	7.95165	12.5581	13.1043	6.46704	12.1514	10.4288	24.0107	6.55536	6.84543	8.88111
Tcea3	4.15465	7.41772	6.64584	4.23471	3.82044	12.5689	5.6738	11.2019	7.30776	9.31162	6.85917	4.99691	6.60135	4.2436	4.88076	5.50319	7.15774	21.6684	7.27214	6.50502	9.29886	9.89467	14.8836	5.75039	13.9855	4.40094	5.15432	3.86398	16.8218	4.99391
Cacna1s	8.08939	3.52596	4.11543	7.15971	5.55953	7.50689	6.17206	9.0646	10.2257	7.38879	6.89342	7.87883	9.54693	4.25335	4.68224	11.2831	4.38187	6.55957	21.847	5.03119	11.2868	3.92309	11.6817	7.08007	13.0663	5.3736	7.12655	6.40391	20.6678	7.25763
Tceb1	5.78038	14.6205	12.4187	21.9412	9.98885	8.76226	7.61744	9.51349	10.1232	5.83515	21.1042	9.5413	5.38117	12.1218	11.4804	7.3654	6.56669	5.29301	5.54691	6.76821	10.4574	9.77592	7.19468	5.83242	7.8354	11.6675	6.26473	3.99812	3.90757	7.07928
Mylk2	14.769	11.4565	15.1543	4.98415	14.442	5.4568	6.89475	9.35026	10.1642	6.38892	8.46906	9.28883	8.41732	8.61875	6.22684	9.46918	10.0437	6.42265	6.85284	6.50502	11.3438	23.7421	13.2246	8.31044	9.60822	11.6021	11.879	8.92221	20.3309	10.8842
Gabarap	11.1563	13.8323	13.6014	12.2494	12.8144	8.29656	16.9451	7.6261	6.41544	9.43981	6.77782	8.67434	9.00357	7.58099	8.28954	5.43731	8.66592	8.45513	7.22409	9.51409	8.27638	6.92584	6.9583	5.81947	7.95359	8.38316	5.91669	12.1112	14.1593	4.58233
Jph1	12.9784	13.4665	24.238	8.80048	8.71139	7.1728	7.89575	7.11599	6.29749	6.82989	6.82064	3.73459	7.04938	8.34591	10.207	5.02446	6.27321	6.11029	5.06647	6.93928	10.5803	10.3273	8.22188	17.0224	11.7575	11.5541	12.5792	4.86351	5.04573	5.42379
Arl6ip5	12.6446	12.8858	12.9819	6.93051	13.2044	9.0761	7.52767	9.92668	8.75392	7.97846	8.58467	9.70802	8.42685	10.2071	11.4562	9.21883	9.06538	8.63912	5.60369	9.60182	20.6778	8.97009	7.50843	8.30613	9.31931	7.39742	20.6877	7.7972	8.73142	8.93599
Kcmf1	5.94138	10.6948	5.04875	10.6814	5.50779	5.65421	5.83989	7.68221	7.2616	5.89155	7.96383	6.44026	8.25526	4.70645	4.65318	7.17655	7.96482	4.98065	18.4664	8.91754	9.21109	11.7099	5.64744	7.15777	11.3416	5.51753	11.6635	6.21353	18.2764	8.19971
Acat1	6.18878	5.46807	4.64243	3.44525	6.68974	7.42084	5.96109	4.38692	5.81031	5.8813	8.56326	7.5311	25.9049	9.72959	7.39861	6.79005	6.35881	5.66956	8.37715	4.97417	8.94341	3.71951	7.33222	6.35047	7.02997	7.48901	7.25499	4.20581	16.6328	7.28507
Hist1h1c	4.11145	4.66483	3.67291	4.04189	3.46227	5.43149	5.82193	9.20743	6.83596	6.00948	8.26783	4.9731	6.36303	5.41291	4.43529	7.70359	21.0656	4.09064	4.78694	8.09728	20.3838	5.49233	2.871	6.31594	4.1103	4.32243	4.10191	4.43514	5.00464	5.17227
Txnl1	6.21627	19.8057	12.5394	12.6859	11.8075	10.2302	5.79051	6.36613	9.10777	9.97821	5.48477	8.0789	8.93208	7.5274	8.33796	6.1005	7.45937	10.4234	4.60787	6.87787	9.09261	22.8939	7.13451	8.76374	9.79644	11.1528	6.37246	7.67171	6.57014	5.00763
Lrrc58	5.31308	11.8563	4.77117	6.86867	13.089	6.05917	17.2997	9.12581	9.35906	6.06589	9.87772	11.2704	11.4058	11.6443	5.51991	5.53393	6.45664	11.1936	5.98805	8.98334	10.8611	12.5327	23.243	5.99215	12.6723	12.1517	7.78534	9.30731	9.38473	7.05642
Psap	7.76346	12.4219	10.3228	8.9169	8.78302	11.0098	4.30922	11.6916	12.2565	10.2705	7.01331	10.1415	11.9968	11.1084	11.311	6.60559	7.92406	20.5045	9.1808	8.3824	9.86934	8.17275	12.6487	17.7822	5.17837	11.7809	3.81187	6.58997	10.1326	10.8887
Ssr3	4.66122	2.5304	4.22003	4.34749	4.06319	10.6656	6.57156	9.83996	10.0565	10.532	5.51474	7.46441	7.37826	7.50791	7.6165	5.47684	19.3495	7.70204	7.55166	6.38659	6.27092	3.93581	6.32651	8.68171	16.8308	4.47073	4.39194	6.7717	4.35133	7.69666
Nckap1	6.75818	6.96519	7.25732	6.86867	8.5522	9.02548	17.4074	6.37634	7.65648	7.08114	7.56992	20.626	7.02555	8.20462	4.77424	9.48235	7.43084	8.85307	10.1592	9.63252	7.61374	8.05824	9.58861	5.10283	9.31056	10.6076	5.32419	7.9097	7.88498	9.21038
LOC100362895	12.2872	10.8984	9.36533	12.0238	10.944	6.96526	6.43241	3.59115	7.09237	7.28624	9.48381	19.1493	6.94929	9.8855	6.58515	9.19248	5.78	5.49412	9.77917	8.35608	10.0273	10.9083	12.5971	7.45134	6.57911	25.0971	11.0213	7.18277	10.942	10.125
Dynlrb1	6.78174	8.92238	8.59695	3.24152	5.28096	9.99232	8.36258	6.6671	10.2155	8.63479	8.61464	8.45998	8.38872	5.5883	6.90473	8.95531	20.5724	9.64894	8.97989	4.48728	8.66255	10.1534	8.22188	6.65699	7.14378	8.87167	5.1046	8.77076	7.99182	21.8278
Dnaja2	3.82872	5.45676	8.80212	6.61036	8.09853	6.68179	8.89674	6.98846	5.26671	7.19908	3.01855	8.15035	7.06845	9.92935	6.23168	7.67724	6.53409	7.09016	7.04065	4.81626	6.00762	3.88916	20.5955	7.71036	9.21863	7.59369	7.85578	10.3198	20.1008	8.88111
Lamtor2	9.61695	8.1116	8.69752	5.10057	4.76759	5.18851	9.4309	5.93764	8.20007	8.83989	6.83348	10.0129	9.1275	6.01705	4.75971	6.53092	16.2435	10.7657	10.906	5.11015	8.95218	8.96585	8.3895	9.14365	9.56007	7.75944	6.63763	9.26836	18.9996	10.3765
Ubxn1	13.1276	21.0464	13.1227	5.97734	10.0167	5.90225	7.88228	9.0697	9.50778	7.99385	7.53567	9.16022	6.62042	8.90133	10.4442	6.88228	5.59657	4.92503	4.99659	8.77279	7.26707	7.54082	5.23914	4.42072	6.57911	4.42275	3.3934	4.86784	14.5373	5.62044
Six1	15.1421	12.1165	14.7802	21.2026	10.2953	11.4653	11.6528	9.69713	9.38983	12.2959	9.01283	9.4365	11.1484	10.0609	9.64531	8.40631	7.1129	21.5914	9.50837	9.16756	12.4672	8.20668	8.72474	7.83556	13.2895	8.80624	12.2353	12.2799	9.36008	8.4741
Msi2	8.81194	5.65662	8.66936	11.3871	4.29003	7.49171	5.3147	7.44246	7.32314	6.15306	7.54851	5.69715	7.89779	6.98172	11.4175	10.9537	7.97297	8.27969	22.7904	5.94356	9.73769	8.63928	12.0814	6.99372	6.37338	11.8943	9.67885	23.2877	9.91478	10.3903
Rilpl1	8.10903	11.4	12.1733	20.1476	12.3368	10.8782	10.3242	11.5998	13.9078	9.20907	10.2759	9.62704	9.29909	9.44214	10.4539	20.5283	9.61974	10.3678	8.45577	10.2466	7.89899	8.19396	10.8092	8.63423	7.24446	10.6033	12.604	10.4886	8.4479	10.3262
Fxr1	13.4732	12.5351	6.50102	21.6174	12.5199	6.90452	5.86233	7.25372	5.21543	6.97346	18.5352	8.21228	10.4192	8.67722	7.2824	8.82355	5.09112	6.56385	7.40316	7.64987	6.25336	4.86887	4.22484	6.71311	7.19631	8.30901	4.31736	11.3496	5.92093	8.43752
Tacc2	4.32351	7.08209	5.05277	9.37893	4.79544	9.33932	6.81844	23.1793	5.09748	9.40392	8.23785	8.49333	10.1999	11.2643	10.2264	8.56881	5.20526	9.49918	5.69541	5.11892	6.42012	3.5117	8.15741	4.65816	18.9538	9.33837	4.17649	7.42508	8.95741	8.29575
Lamp1	12.0163	11.9958	10.367	9.5572	14.0401	10.4023	12.0479	11.6916	11.9693	12.3266	7.95527	20.0067	10.3191	9.8855	10.0714	10.2685	9.98252	10.1924	6.21516	9.08861	7.87704	12.6005	12.133	10.0243	11.1053	14.1537	12.0323	7.26065	18.7202	11.3461
Iscu	9.40097	4.90241	5.23782	6.03191	10.1878	7.85617	5.41794	6.06517	8.42572	5.59415	5.55327	7.90741	8.93685	5.14494	6.314	11.1689	20.3278	9.37082	10.6571	4.49605	10.137	9.8777	7.69324	6.65267	11.0965	11.8681	5.87526	8.90923	18.9955	6.7866
LOC100910827	7.06447	3.71452	8.36765	17.3754	11.1788	7.98778	7.06981	5.82032	8.61546	7.99897	7.72834	10.5607	9.69946	13.0183	8.81248	9.26714	6.13055	20.573	8.19808	5.13208	11.041	9.21608	6.57579	9.17818	11.0527	9.53464	10.4495	11.7694	10.1654	10.6784
Eif4e	7.39433	6.53906	11.8636	8.28023	10.1441	11.5413	9.02243	8.25863	11.8052	14.0238	9.37249	7.35485	9.27049	11.6395	11.34	6.52214	6.41995	5.64816	7.58661	7.55337	4.9632	4.98763	3.85522	21.7108	7.5465	10.5684	9.1775	2.89041	4.98821	20.0671
LOC681410	11.278	8.3982	20.3599	10.434	5.36851	6.88933	8.46133	9.86547	5.93851	8.88091	7.7369	8.47903	8.62704	9.9732	7.35988	18.7231	8.01373	9.55481	8.27233	9.56673	12.0284	9.61051	10.59	6.49725	3.88268	11.541	7.88892	12.691	8.263	11.3461
Ppp3cb	3.8405	4.41971	3.64073	7.05785	4.04727	5.17839	3.00299	7.08538	5.77441	7.10678	7.23167	5.63522	5.99603	4.419	19.2906	7.86609	4.85471	8.71614	7.52983	8.61049	8.62306	4.37265	11.1917	5.8022	5.30531	5.5437	10.2092	12.4876	22.0114	8.593
Mrpl12	9.96645	11.6677	9.78371	14.5086	24.415	6.01868	5.3955	10.1103	5.90774	6.00436	7.97239	9.90809	7.65947	10.6602	9.48552	7.00087	7.45122	4.68541	7.02755	7.78146	6.65709	4.55503	4.66322	18.1319	9.64761	5.3387	7.74391	4.99765	5.18954	5.03507
Cct5	4.6298	5.31723	14.9049	10.9615	11.4653	5.59347	6.20797	5.12657	7.52827	5.79926	8.23785	5.9258	7.47359	7.6492	9.01585	5.27481	11.6945	6.60664	6.3855	19.4844	6.916	5.71711	8.26916	4.37324	5.05143	10.769	5.63909	5.81977	5.97024	10.0656
Art1	9.72298	13.5759	12.5193	7.51988	9.67446	8.19532	7.43789	7.79443	4.69235	6.18895	8.89294	9.67467	9.98544	6.75761	6.17842	7.4225	5.84521	8.76321	6.8179	9.89132	13.7969	11.1246	13.9424	17.9851	7.5465	9.69603	9.40124	3.94187	8.46434	7.19361
Kat2b	9.04755	13.3572	12.8331	21.2026	14.3067	12.2753	9.62841	6.6977	12.4616	13.0804	7.61274	8.73626	5.28585	10.4555	10.7251	7.22925	8.09118	9.97842	7.86177	10.9134	7.50842	10.675	9.87657	19.1896	12.1602	11.1877	12.5916	9.21644	9.05602	6.86434
Mrpl17	7.51214	13.4213	5.75276	12.6314	14.1356	7.16268	17.5825	6.72321	6.45647	7.1478	5.16364	10.1796	7.95022	25.0572	9.80026	8.84112	4.59791	8.2583	10.2771	5.0619	12.182	9.50448	9.49836	8.70762	5.83934	7.68965	6.74536	8.95682	6.06885	6.05946
Adipor1	8.37213	11.3208	13.2313	9.12427	9.18894	7.26392	5.05884	7.86585	8.41546	7.31188	9.2526	8.79819	8.87965	7.45919	6.50284	6.49578	4.9933	8.49364	22.0785	9.6062	9.54022	5.89948	7.43966	7.61539	10.2342	8.80624	12.2436	13.0025	8.29587	25.0061
Sec61g	11.6982	3.74846	11.9883	18.8706	9.67446	7.87135	6.02393	5.33572	7.40519	5.025	5.97715	11.1799	11.2533	10.8404	22.9076	6.82079	6.583	7.39824	4.76947	9.33863	5.12556	7.45175	7.18179	7.9478	4.78879	5.90136	4.62397	10.6616	4.48692	5.73019
Capzb	11.5097	5.1513	8.39983	18.6342	6.76138	8.88881	8.48826	8.46777	9.51803	8.51686	7.59989	10.0653	8.6318	9.87575	5.60222	5.90286	5.35608	9.15687	9.02356	9.44391	8.57479	11.167	23.849	7.26138	9.90587	10.6338	4.62397	8.97413	9.54909	10.4726
Vim	13.1276	10.016	15.1543	21.9412	14.5017	7.74481	8.42991	8.41676	6.54365	8.77323	9.48809	11.4991	6.97789	12.5164	10.7106	8.18671	14.8454	5.60109	6.10597	10.33	7.33728	13.3258	10.7533	7.4427	9.34995	11.9641	13.2918	10.3847	10.4859	8.81252
Shfm1	9.25175	12.3692	12.5837	21.9412	9.98885	10.4226	6.5536	6.98336	5.8821	7.73234	6.2469	6.4736	9.42778	10.4555	21.9973	5.78428	5.62103	5.23739	4.63408	9.99221	10.0712	9.46207	8.04997	5.5993	11.311	6.53817	3.53427	6.19622	6.84543	6.02288
Pnrc1	9.67978	11.0191	5.22576	6.08648	10.2157	12.3512	6.52667	7.57509	11.8001	9.93206	9.80921	10.3463	10.7814	11.4738	10.9333	6.35963	8.60885	11.6044	21.6199	10.5975	8.97413	11.5869	13.4567	8.84145	8.58392	10.5989	13.0308	10.4713	8.41914	21.0138
Me1	13.4732	10.2083	11.598	16.9097	13.674	5.99843	7.32567	6.89154	6.5539	7.49647	7.17601	8.12654	8.51264	7.74177	6.93862	7.35662	5.8656	8.21123	19.8204	8.29029	7.28462	4.91977	4.74488	7.95212	7.0256	10.0624	12.0737	12.1112	5.60454	7.61892
Ppm1b	10.0411	10.6948	11.8957	6.40299	6.88474	12.7561	12.0479	7.98827	10.9232	10.8243	7.91245	23.2649	9.55647	8.89159	10.6089	8.83234	9.59936	11.6258	9.69618	5.43913	13.5511	7.83346	11.7462	9.43289	9.97591	9.86613	11.7671	19.9214	8.71909	9.77746
Rad23b	7.97944	5.79615	5.30621	5.49348	8.99792	24.019	5.24737	6.73341	6.78468	6.553	16.4243	7.68353	5.81967	10.1242	7.77145	4.067	5.77184	8.07858	4.76947	7.10157	8.3071	10.1788	6.89383	4.52002	9.58195	7.69837	6.10314	4.2361	6.31538	6.42074
Prnp	10.9796	8.70366	5.94988	11.1434	4.96657	5.73014	5.52119	6.30492	7.3334	6.92219	6.01997	8.47903	6.75387	9.78318	8.78343	6.04341	9.473	17.4665	9.19827	8.58856	10.3389	7.70198	10.4009	6.39796	8.41758	9.18571	8.3364	24.5166	8.29998	6.87806
LOC102556059	8.07369	7.33853	4.89588	3.60168	8.25373	9.37982	7.55011	8.26883	8.75905	8.43481	6.05422	9.62228	9.36105	4.09257	10.5169	8.77963	5.77184	8.79744	20.5542	10.1326	11.0191	6.58231	9.73474	7.04121	8.99539	9.58698	11.6469	10.5275	19.8172	5.60214
Slc38a2	9.31458	13.9869	14.5911	20.7843	9.66252	8.97486	7.9945	6.61098	8.32828	7.90668	7.76259	10.6845	10.4382	8.21437	10.5411	6.8164	7.70802	7.70204	9.45596	8.03149	9.55777	11.6887	22.405	8.89757	12.0114	11.9336	7.79363	7.60248	7.83979	10.3765
Crat	11.6668	10.3215	7.77226	8.94236	10.6574	7.32466	5.52119	6.64669	6.16929	7.22984	19.126	6.99759	6.75864	7.86845	9.10785	10.3783	7.24334	5.79365	7.18915	5.56195	9.95711	6.18788	8.70325	6.55338	10.4312	3.8252	3.77458	6.86257	6.68108	23.9589
Rab28	4.95181	6.47118	3.57636	10.0083	4.16666	8.11433	4.56059	8.72793	5.47184	5.59928	5.51902	8.8363	6.14378	11.0694	6.51736	6.08733	7.23926	6.50394	17.6933	6.64539	5.02902	8.51204	9.84219	8.32771	7.92733	11.7198	7.5906	25.0229	10.4982	8.29117
Pcbp1	6.89169	6.72761	5.7085	10.2448	5.69086	11.5868	9.28278	9.32985	11.2822	10.7268	5.68172	10.1415	9.43731	9.42752	5.02602	8.99484	4.15361	8.68191	19.4317	8.83859	9.57094	5.39054	9.77772	4.88265	8.98664	4.50126	6.55062	8.98279	7.64667	25.0061
Kpna4	11.7218	8.77154	12.9819	12.0747	9.75405	5.56816	5.89375	8.5953	8.26674	5.67107	6.22977	11.0323	9.70899	10.8404	5.0696	5.389	4.89139	6.3713	6.21953	8.05781	10.3608	14.3903	25.2545	5.87127	9.6695	4.49254	7.27571	8.93086	4.14177	4.66922
Sub1	12.8527	13.0102	13.0423	12.1111	9.86548	6.1351	6.90373	9.49819	6.46672	6.63505	21.1042	8.19322	8.79862	9.09135	11.0108	7.12823	6.83165	7.47526	6.42918	6.95244	6.52544	9.02099	7.358	7.0628	6.4653	9.9272	6.91938	6.71978	17.2327	9.8552
RGD1304704	15.3463	4.34806	13.0624	7.28704	13.3317	6.99057	7.65784	7.40675	5.82056	9.97821	6.54661	7.79309	9.24189	6.63093	7.8925	7.55865	5.9675	13.6968	6.14965	4.11005	7.47332	6.18364	4.46552	9.19113	4.69686	10.6949	6.46776	5.14044	14.3319	4.32623
Zfand6	14.4706	9.95566	9.15211	4.1765	10.4624	7.49171	7.43789	8.1107	21.7028	5.33778	8.75593	5.11124	4.5852	6.86479	5.79106	4.36127	6.08163	9.85433	6.40734	6.0927	10.2555	9.18215	4.0959	7.43407	19.1245	4.57105	9.42196	4.19716	5.62098	4.62806
Prdx2	5.49765	5.53595	5.55966	19.973	5.73065	6.20091	7.41994	6.92215	6.90263	6.50173	5.54471	10.9275	7.44022	12.0536	12.0421	4.91027	5.20526	20.9324	7.39006	11.0406	12.1293	12.9865	7.45256	4.15738	10.1598	6.14561	7.88064	9.00009	8.0329	6.86434
Hmgn2	12.6328	7.45543	11.771	21.1844	13.5785	11.6121	8.81145	9.0901	7.81033	10.1269	9.07705	10.4178	6.38687	11.5712	11.3691	9.7854	6.80719	11.8697	20.8118	6.37782	11.7519	8.48236	11.6559	7.86146	7.4502	8.29593	12.0737	12.0376	10.1778	9.47105
Nol3	13.4614	6.50135	12.5756	10.6777	13.674	10.782	9.52068	12.2579	12.1488	8.74247	8.45622	8.23133	8.19807	8.4531	7.29209	10.2817	9.3018	7.81329	19.9252	8.1894	9.07067	8.16427	14.557	9.48901	12.436	8.45295	12.5916	11.7088	16.2219	10.436
LOC100365414	14.8868	8.21342	7.20503	11.5472	12.886	9.44563	9.98751	7.32003	7.87186	10.2961	8.68743	6.03059	6.3964	8.43848	23.9922	8.98606	9.34664	8.92153	10.3339	8.7684	7.58741	5.61108	7.60728	9.71782	9.26678	6.61232	13.4493	10.4107	7.07964	19.3628
Gbe1	6.20056	7.46297	7.45445	5.04963	8.15822	8.89387	8.50173	9.17172	5.34877	8.37841	5.1979	5.6781	9.66133	10.3678	9.31605	9.30667	17.0465	5.12614	7.04502	9.32548	11.6071	13.7329	12.2361	9.02708	22.2674	6.16306	8.60986	7.92268	10.0504	10.7287
LOC300303	11.3055	5.57743	6.80676	6.06829	8.86659	5.79089	19.0728	5.7183	5.61543	7.01961	6.18267	7.7788	4.67099	5.70036	5.95569	6.77248	4.65498	20.4703	4.59913	4.86451	9.77719	13.7329	13.9424	5.74176	12.4447	4.24828	7.0934	4.36591	7.23989	8.95428
Myo18b	13.3946	21.9552	13.0624	10.8778	10.0167	5.61878	8.92816	7.02927	6.93339	6.8504	5.59609	5.15887	8.62704	8.16077	9.29184	8.05934	20.3074	6.55957	10.3164	7.0928	8.5309	5.50929	7.38809	5.88422	10.383	9.30784	7.82263	5.40438	7.25221	6.16922
Commd3	11.5686	5.7245	5.20564	4.5876	24.2836	5.63903	6.11819	6.75381	8.78982	7.3529	8.14366	8.53143	4.77108	6.47503	5.29717	4.92344	6.45256	18.4849	5.14072	4.46096	9.23304	8.39753	6.27493	6.31594	6.87677	6.44657	5.15017	4.86784	6.04009	6.32013
Tsc22d3	12.2872	22.4606	9.3613	12.4385	8.16618	7.14243	5.10822	11.0183	8.09751	6.27099	18.5694	9.59846	8.83675	11.4348	9.71794	4.86196	10.1741	4.44151	7.86177	7.31651	8.62306	6.51869	7.22907	10.9914	5.06894	8.80624	12.0323	5.31784	5.74835	9.95581
Cd81	15.1421	13.4665	9.3613	20.7843	14.2232	11.6121	8.42991	8.83505	12.8309	9.79874	8.90579	9.1364	9.99497	24.4531	9.73247	9.99183	9.50561	8.67763	10.8885	8.73331	13.7486	11.5275	11.08	10.3093	5.81308	13.2072	13.3084	11.7823	7.848	9.94209
Ptpn11	9.40097	11.4792	13.8388	7.49805	5.37647	9.25833	6.81844	5.78461	9.36419	7.22984	6.49951	8.43616	11.3343	8.55541	5.64096	8.17353	9.40778	5.73374	10.2902	8.75086	11.5545	8.54597	9.99262	22.5181	6.68854	13.8222	14.1081	23.5041	10.0874	9.3613
Ndfip1	8.27788	11.2341	9.7998	8.63677	4.75167	18.1471	9.46233	7.03437	5.42569	7.12216	5.11655	8.70768	9.34675	9.57368	9.85836	7.58061	15.9541	7.71488	6.89652	7.32967	8.50019	7.63412	7.83507	7.54631	10.2648	8.57944	10.176	6.78036	4.53212	9.83233
Chpt1	12.5975	4.07277	12.5193	3.19058	10.1242	8.83313	17.0618	8.21272	6.1898	9.35777	7.30018	7.58826	8.15994	7.21559	8.67206	7.37419	19.3495	9.65322	9.19827	9.82114	8.66255	7.41358	3.93688	7.28729	4.36419	6.29391	6.099	6.74142	7.32617	5.4741
Rac1	6.60896	4.12556	3.39533	5.14422	7.5971	6.15535	5.5167	6.73851	7.63084	20.9563	5.33063	5.64951	5.56706	5.02314	4.60476	10.2905	6.2406	5.39999	9.28562	6.94366	8.57479	22.5037	5.02854	4.36892	10.7551	3.7903	6.42632	4.45678	9.22038	5.82623
Tcp1	3.40461	4.03506	3.52407	7.09786	10.0286	10.3872	6.2349	6.43755	8.69238	22.4228	7.18029	5.28749	4.528	7.21071	5.2536	6.57923	7.85476	16.4952	8.34221	5.28999	11.7827	8.054	8.21758	7.42543	5.82183	10.6687	6.79508	5.0539	8.62048	4.60519
Tmbim6	14.8868	7.90796	13.1227	10.8815	7.84383	7.98272	17.4074	7.6414	8.83598	8.82964	10.0961	9.74613	10.667	25.179	11.0931	8.81477	7.74878	10.4962	10.312	8.7684	9.83863	10.0261	8.52703	8.31476	5.17837	7.60678	10.5034	8.80971	10.4079	11.1997
Golga4	8.10903	11.7054	11.6061	21.5664	9.60282	13.9052	9.98751	12.5231	12.2565	12.8035	9.53519	7.13096	11.4439	11.3423	8.73501	19.2151	9.72572	9.46495	8.2898	10.9177	8.10524	9.48752	9.27917	10.5726	10.5012	7.47157	12.3969	13.1323	7.55627	10.7241
Lrrc39	10.795	4.11048	6.55331	7.12333	8.44873	11.6121	7.25834	12.2579	27.149	9.98333	21.3482	5.7162	4.64716	5.1352	7.09356	8.99923	4.9933	8.90441	7.48615	6.18043	9.2462	10.8574	7.78779	6.47135	8.52264	6.83476	6.84066	3.60004	8.56706	8.04422
Epas1	6.06312	6.99536	9.09981	4.12193	6.31168	5.81113	8.34911	7.90155	9.16418	7.2401	6.06707	7.90265	6.49649	5.33495	7.4083	9.04315	4.87916	5.58826	7.5604	5.02681	6.8019	6.79013	5.95259	6.68721	20.7704	4.48817	3.65857	5.60342	6.29073	23.3781
Tbca	6.14558	8.61692	14.9049	8.93872	24.415	7.68406	6.84537	7.38635	6.3539	5.9377	10.1004	7.48346	6.69191	8.67722	7.79082	5.9951	15.9174	4.68541	8.87506	5.71547	7.13103	11.9304	10.7319	7.33046	10.0197	11.4451	6.92767	5.29621	7.01801	8.90398
Rab6a	6.40868	9.81613	11.6584	14.4176	8.93027	6.51981	8.26831	6.2284	6.88724	7.02474	6.01141	8.11701	11.2151	11.8197	9.77605	9.55702	20.3278	9.37082	10.9322	6.14095	10.1151	12.2188	12.4123	6.39796	11.7575	11.746	10.8473	9.25538	10.0463	6.35672
Pla2g16	8.34071	12.2032	11.2118	8.4585	3.89605	10.6048	8.94163	8.6004	5.48723	11.3421	9.48809	4.95404	7.85489	7.58587	5.28265	10.4354	8.11564	4.73675	5.66047	22.8093	9.94833	6.49324	11.7118	8.12912	11.6831	7.21859	3.83673	5.49958	7.3837	20.0991
Lsm14a	11.7296	7.23294	9.41762	8.70953	9.21282	8.87869	8.33564	8.35555	7.7693	7.36828	8.76449	10.9608	5.19529	12.5164	11.2722	9.14417	7.76916	20.787	6.18896	9.14563	10.4135	11.8456	13.9424	9.13501	11.1096	6.2503	12.198	23.2012	8.83003	9.73172
Pdzrn3	6.20449	5.37002	7.55904	7.6654	8.53231	8.58003	8.52417	6.74871	8.26161	7.92206	9.37677	11.1609	9.58983	10.7771	6.24621	9.6756	3.10196	8.36099	10.4343	9.95712	13.1825	9.30515	23.849	5.77198	12.7993	8.66667	8.79631	7.36017	15.848	8.81709
LOC100910937	14.8868	22.4002	14.7842	9.63359	15.5165	11.1211	7.9945	7.68731	11.3078	10.1372	6.72216	9.1364	9.33245	10.4848	9.8051	8.5776	10.2678	20.9324	9.91893	9.08861	13.9768	12.7405	9.28346	9.85597	10.6807	11.746	14.1454	11.4535	10.5476	10.3034
Ctbp1	13.1276	8.80171	15.2106	8.8696	15.7474	8.1042	4.4753	8.63611	5.93339	7.57851	7.59989	9.17451	10.6289	12.2095	12.5747	5.35386	19.3495	9.15259	14.1687	6.30325	11.5106	12.0704	10.9339	7.28729	4.53053	12.1735	4.36708	5.28323	7.21523	5.58842
Ppp2r5a	15.3463	21.9552	10.1739	13.5009	15.5165	9.57724	5.68727	9.00339	9.93342	5.86591	7.91673	5.3637	7.06368	21.296	8.87059	7.25121	6.57485	6.60664	9.02356	5.0926	5.92863	6.03944	6.07723	3.99765	6.41715	10.3241	7.18455	4.75101	6.53726	6.10977
Dcun1d2	10.6733	9.11094	6.29987	17.5391	10.4545	5.98324	8.29525	6.62629	8.58469	8.94244	6.87201	9.4365	9.79478	6.28501	6.54157	7.43128	6.31397	7.2442	8.81828	4.64519	10.058	10.9592	7.34081	22.5181	11.3022	11.6631	12.7905	13.7381	4.97588	10.1387
Actr2	13.8816	22.4002	8.52856	9.63359	15.3693	13.9052	11.4553	10.9622	10.0052	12.26	7.07753	9.71278	10.219	11.1084	12.3375	6.36842	7.54497	9.50774	7.31581	6.04884	12.9324	25.2223	8.24767	6.61382	8.34317	14.4415	12.0654	14.0756	6.37702	4.49086
Spcs1	11.4037	13.9869	8.09811	6.08284	15.3693	6.57549	7.5546	8.48308	11.6411	5.90693	9.71502	9.64133	4.98557	8.30207	6.08642	7.9188	11.0301	6.97035	6.86158	6.82084	8.12718	10.5648	24.0081	5.62952	8.17245	12.0339	7.52016	7.27796	9.29434	11.3964
Phb2	8.27788	12.8556	14.9049	21.279	9.65456	6.97539	7.76557	6.00396	5.88723	8.04512	7.96811	10.4416	9.61843	10.3142	6.33821	4.93662	5.92674	18.1768	5.21497	8.94825	10.6724	6.19212	8.35512	8.11186	8.15495	14.1755	10.5862	5.23996	8.50954	9.82776
Cox7a2l	6.58932	8.3982	7.03606	6.4612	4.27411	7.29429	6.77804	5.81522	26.0105	12.9317	5.60037	20.626	9.05124	8.76004	5.14223	4.48864	6.03272	10.4577	6.38113	5.03997	10.7997	8.28726	8.87516	5.10283	11.0527	8.91092	6.84894	9.10827	6.0935	6.25154
Cox8a	11.5333	9.42394	14.7842	21.9412	15.4966	7.12218	6.59849	6.48856	6.8975	7.17344	6.75213	7.46441	9.12273	9.14007	10.4685	5.06399	7.18627	21.6684	6.20206	9.23336	11.493	7.61292	7.26775	7.58948	5.49354	14.1755	12.459	7.38613	5.71137	10.5686
Pam16	4.96752	8.16439	11.5015	21.6174	9.01782	8.21557	8.69924	11.0285	8.17956	9.17318	7.66412	6.18303	7.87872	8.49695	9.57268	7.18972	7.44715	8.55782	7.30708	18.4799	8.35976	7.67653	7.76201	9.40699	6.68417	13.6172	12.8319	7.23469	3.04881	7.05642
LOC367858	13.1276	13.9869	10.8256	18.6014	13.1964	6.29202	6.13615	6.80483	5.60005	6.06076	8.44765	10.8655	9.15133	8.02436	7.21946	5.80624	6.5137	8.07003	5.69105	8.79033	6.12171	7.24817	5.7334	17.562	6.94243	10.2936	5.70124	4.30101	3.91989	5.41464
Nsa2	13.0962	5.37002	8.23087	10.9251	9.34415	5.89719	7.11919	5.91214	6.17954	6.90168	9.36392	8.68387	9.5088	8.09256	4.37235	18.5606	7.32894	5.14325	7.62591	5.20226	7.84194	4.96642	6.67894	5.66837	9.25803	6.09764	3.70829	6.61593	20.1542	5.95885
Pnpla8	15.1421	9.5333	14.3779	21.5664	14.4261	9.70885	9.71819	6.25391	12.277	12.9778	6.91055	9.77947	11.3343	9.52984	6.58999	8.38435	8.06265	10.3507	8.11072	7.74637	10.0931	8.16003	23.243	9.26452	8.66271	7.2404	11.9204	12.9809	11.5707	11.1723
Mtdh	13.4614	11.1435	6.17516	14.1848	8.5721	10.5593	8.18303	9.51349	8.40007	7.78362	9.72786	10.1082	9.79955	10.3386	9.07879	10.3695	6.27729	21.5914	9.21137	10.773	8.72399	12.1807	8.90525	6.03964	12.9218	9.40379	11.3569	21.4228	8.0781	7.28965
Strn3	7.94803	13.4213	23.8478	9.56083	12.5199	9.65317	10.0952	9.65122	10.6001	11.2242	8.35346	12.5852	25.9049	8.69183	11.3158	9.83811	7.53275	10.1196	10.8667	10.3694	8.69766	12.7363	11.0499	7.85715	9.99342	12.0252	13.6855	12.2929	9.37652	9.4802
Psmd11	11.926	9.06191	9.42567	9.23341	7.93138	7.95235	5.30573	7.41695	10.5642	7.08114	6.25546	9.90332	8.89872	10.7089	9.66952	6.78127	7.54905	5.86639	4.21041	9.37373	10.453	11.8371	11.0241	19.2025	11.5649	8.12582	19.0428	5.67265	7.07142	7.81099
Zfp91	9.59732	13.7343	9.86014	21.5664	12.0543	11.5565	9.62841	9.78895	12.2104	14.0238	5.96003	9.9843	9.056	11.43	25.0042	6.84275	8.00966	8.66907	10.3819	9.93518	12.1249	8.56294	9.23189	8.83281	10.2779	9.56518	10.2051	9.25971	10.7242	11.6296
Mrpl27	6.92311	7.26688	6.84296	8.7932	19.8941	8.56991	7.59949	6.04477	5.60518	10.532	8.35346	9.4889	5.8578	9.2911	12.5602	6.42112	7.05176	8.98143	7.49489	5.46106	7.5567	5.43719	7.64596	6.27708	4.16283	6.59051	7.05611	5.25294	14.0031	6.69056
Lrrc20	6.06704	6.27885	5.37863	4.70038	5.32075	6.71723	5.46732	7.44246	7.69238	6.94783	5.45051	5.73526	5.8721	5.8855	5.06476	8.4107	4.49601	9.06701	8.97115	4.5443	8.07013	5.1912	9.60581	5.35322	19.1245	10.25	4.27179	5.13611	19.8172	7.843
Edf1	11.9338	8.80171	14.5911	8.93872	23.619	7.59801	7.14163	6.00906	6.6975	6.35816	7.58277	9.58893	9.5088	4.94519	22.9996	5.35386	6.43218	6.67082	4.99222	8.11044	9.30764	8.04976	6.47264	7.17072	4.69249	14.4633	6.60449	6.82363	5.87573	5.49696
Pcmt1	11.5097	8.53019	11.8957	15.7164	11.4533	10.9389	10.6294	6.90175	5.87697	10.4602	10.2716	8.85535	8.98928	9.92935	7.37924	5.56907	6.13055	8.96004	8.019	10.4045	9.097	7.29483	8.74193	22.5181	8.61456	14.3761	12.8319	6.50343	9.4628	7.50459
Apoo	13.0255	5.66417	12.1492	8.16018	21.1079	9.48612	5.77705	7.76383	6.24621	8.27586	18.0043	9.71278	9.98544	10.8599	10.3861	10.1807	7.72432	7.36828	6.97514	10.1457	4.74378	10.111	12.5327	7.87441	9.78331	11.7766	4.62397	5.47794	7.04677	7.59605
Dedd	6.016	6.12047	5.31426	7.71997	5.71474	7.50183	6.28428	9.0544	9.52316	7.58364	9.98476	9.83187	5.06183	5.16443	4.37235	4.62918	14.8372	21.095	7.67396	10.7423	9.70259	12.5539	11.5742	7.53336	6.56598	6.61668	7.26328	8.91788	4.35133	6.4116
Lsmem1	13.0962	17.6298	11.6383	8.80048	5.14565	6.68685	5.06782	5.88153	8.26161	6.61454	7.25308	6.98329	8.21237	8.7503	8.07649	4.98054	5.79222	16.7006	8.62174	5.96988	8.38609	10.3485	7.44826	4.55887	4.76252	4.20903	8.48971	4.70341	5.92915	6.06861
Fermt2	7.03306	18.2294	12.4268	7.50533	9.41976	5.40618	9.46233	6.74871	5.25646	6.32739	4.91103	5.95438	5.42884	8.93544	7.98934	7.89684	5.76369	6.96607	5.88322	6.07954	7.73662	7.65109	7.84796	8.89757	21.9391	9.12028	4.72755	11.778	5.64563	10.8064
Mybph	13.1276	22.4002	15.3876	14.3776	9.98885	10.7061	8.09325	7.27922	11.3078	8.5066	7.11607	9.97477	11.7728	11.5907	12.3375	6.71099	20.5724	9.62755	9.74422	10.9441	11.3614	10.0855	9.42529	10.2747	5.49791	13.9181	10.665	13.6386	7.848	10.0656
Ndufa10	18.1894	4.16328	7.80042	7.84731	10.359	8.11433	7.62193	7.69751	6.02569	6.73247	5.245	7.40248	7.57845	8.91595	6.39631	7.37858	9.0287	4.32598	5.00969	6.062	4.68673	4.96218	5.98268	10.9741	20.8535	4.30062	4.90986	8.71451	4.34311	7.30337
Cdv3	13.9248	12.2334	8.75787	14.5086	12.3488	8.53953	12.0479	10.901	9.33342	11.2909	7.39866	8.82201	4.97604	10.514	10.9091	9.40769	5.2827	9.54197	8.70909	10.5624	8.20178	8.32543	9.12874	6.5836	21.8778	11.07	13.3747	12.6174	7.74939	24.5534
Fabp4	4.0604	9.62003	7.21709	17.5391	11.3141	7.88148	6.9127	6.52937	7.2616	6.2351	9.26116	9.83187	9.47544	9.65651	12.5747	7.036	8.10748	6.78635	7.22409	19.3396	10.9928	13.7329	13.1043	6.73038	14.3445	6.14561	9.2728	9.39385	8.00825	7.09757
LOC685447	7.9441	19.3758	7.19296	6.47212	6.67382	8.86856	8.25934	7.33534	7.52827	8.70657	6.52948	8.35518	8.59844	9.72472	10.0472	7.585	5.58842	10.6759	7.46868	22.0022	8.12718	6.71379	11.2347	6.32457	11.4817	6.54253	8.10438	7.71066	4.33489	5.22257
Ubl5	13.7088	10.4421	5.14127	17.4409	8.38506	7.08675	5.36857	6.00906	9.55906	8.22459	6.67506	9.67944	7.98835	10.3873	24.9364	5.34069	7.04768	7.33405	4.53799	7.85165	6.0515	8.38057	10.6889	5.54317	6.09761	10.7428	10.4081	4.04139	5.07449	4.66007
Smyd2	5.02249	4.64597	3.63268	5.10057	3.64931	6.06423	8.46133	9.68183	8.35905	6.76323	5.96431	6.93566	6.31537	5.28623	4.92434	11.2172	8.27461	9.59332	22.4322	5.57511	6.77996	9.23305	4.60305	8.72057	13.3771	7.83359	10.5531	11.1333	22.0114	8.593
Psmd2	12.4168	6.02619	9.34923	6.84684	7.00015	8.13458	7.16408	6.52427	5.39492	7.76823	8.48619	9.96525	10.81	10.3386	11.0108	5.48562	5.4539	4.86512	8.55622	4.66712	6.20509	8.4145	19.9251	5.8022	8.34317	5.99732	5.32005	6.01449	16.2178	7.93447
Atp6v1d	10.0175	5.66417	7.30158	8.73499	10.1242	8.15482	7.05186	8.55959	9.73855	7.69645	7.77544	9.6842	9.79478	11.2399	11.064	10.2202	6.61153	19.7472	9.90146	10.2247	9.75086	9.21608	8.87516	10.1582	10.0459	8.63614	23.8242	7.60248	11.1516	10.8339
Psmc5	11.5333	5.88289	6.40849	7.41801	3.16778	6.17053	7.67131	10.4011	7.50263	7.46058	8.11797	9.00302	7.7977	5.67113	5.89758	7.1458	19.2395	4.50997	3.61205	6.52696	5.8277	8.75379	7.87375	7.07575	3.89144	3.89935	7.13069	9.9477	13.3128	8.44666
Dph3	6.18485	7.90796	8.26305	6.54124	3.62941	8.37249	21.573	7.94236	5.33338	10.655	8.39199	7.56444	9.38011	4.73569	9.97941	4.93662	7.58574	10.094	5.06647	9.36057	7.5567	6.35329	8.23478	9.56672	4.41672	7.21423	9.74928	5.12313	12.8444	4.71037
Kif5b	7.13909	5.55103	5.77689	8.26932	11.513	5.5226	7.0743	7.03947	6.90263	6.37354	5.82302	7.95505	9.78048	9.65164	7.01125	5.0025	19.2395	8.05719	3.46355	4.29867	10.7646	14.3734	24.7172	9.3336	9.62135	4.67137	10.9881	6.11833	4.4787	6.58538
Fkbp1a	13.7088	13.0253	24.061	10.9469	9.20088	12.2753	8.04387	7.03947	10.2565	11.378	6.67078	10.4559	8.53648	12.0633	10.5072	9.76783	9.64827	9.40505	10.3208	9.865	11.1244	5.56867	8.17031	22.4015	9.94089	11.5803	12.5916	8.05681	7.67132	9.28813
Psme4	23.2865	9.97828	14.2371	9.37165	14.8758	11.9817	10.1985	6.57528	8.41033	12.9419	7.26164	10.9942	6.16762	9.27649	9.46616	10.8878	15.9908	7.98445	10.2465	9.75096	6.03395	8.94465	10.8952	8.073	8.8203	13.6128	12.8319	11.6439	10.2805	11.0991
Eef1d	14.4431	21.5706	7.1648	9.63359	15.7474	7.82073	5.39101	8.17701	7.08211	7.49647	7.19314	11.5372	5.04276	8.43848	7.1323	9.05194	8.75967	6.99602	8.62174	3.31173	8.22811	4.35569	9.29206	5.59498	5.35784	10.926	3.74972	4.24043	8.82181	20.9817
Pabpc1	15.3463	4.44988	13.5572	11.831	14.8758	10.2555	7.66682	9.75324	9.78983	12.2959	8.9957	10.1558	9.54217	7.97563	10.2651	8.58638	7.29633	7.53088	7.75694	10.1808	14.3147	12.8465	10.186	8.35793	24.7975	10.4288	10.5448	7.89672	15.5974	10.6967
Ano5	14.769	7.16129	11.9279	8.41121	15.7474	7.35503	6.32916	22.5671	6.25134	5.88642	6.06279	6.20208	8.38395	7.74177	7.5584	4.65992	6.44849	6.44832	7.21536	6.44361	4.74378	5.05124	5.57438	5.50432	7.05186	14.3063	22.7925	3.76879	4.93068	5.64788
LOC688815	5.42696	10.74	7.82858	8.51307	6.94046	7.42084	4.94214	7.90155	9.88214	7.58364	5.15508	7.04998	9.41824	9.52496	10.0327	9.53066	15.306	11.4204	9.44286	19.0984	7.48209	12.5539	13.2203	4.61931	10.5231	9.4823	3.94032	7.23902	6.98103	5.4741
Tspan8	14.4706	13.7343	10.3711	6.93051	12.8104	9.7949	9.57903	5.82542	10.3796	6.35816	6.67934	9.79376	9.37058	10.2363	19.8039	5.97753	9.29772	6.73501	7.77005	7.7069	9.97466	11.1246	10.8307	6.41955	8.59268	8.31337	11.3569	9.11692	16.8424	7.86129
Hnrnpa3	14.5845	10.8569	11.236	7.15971	10.2037	7.90173	4.8344	9.23293	7.59494	9.37828	10.0961	9.36028	9.12273	6.34348	5.66033	6.53092	7.70394	11.2321	9.56515	9.32986	23.7891	6.02247	11.4367	4.68407	9.26678	9.73528	12.5916	5.50823	20.3309	5.4558
LOC100911713	8.69021	13.4213	9.93658	9.35346	11.2782	11.6982	8.3536	10.9061	10.1232	9.48083	7.50998	9.92238	6.72051	10.2801	21.3291	6.6539	6.155	4.9507	4.49431	8.8342	11.3614	11.7438	6.146	7.99529	11.5649	23.7363	11.7878	10.6097	4.90603	6.77745
Dst	12.1773	5.25312	12.4348	13.8829	15.7474	7.73974	7.18203	25.7757	5.46671	6.32739	8.91435	9.83663	9.48497	10.0365	6.13	9.59215	7.99335	20.3291	10.0762	9.62814	10.2467	6.12426	11.8751	7.03689	7.31012	10.0013	9.67885	4.99765	8.42325	4.97105
Asb12	11.2898	4.92503	4.94013	11.1543	13.3675	7.2133	6.80049	10.0848	8.62572	5.90693	8.03234	6.83563	6.80154	5.40316	8.51712	9.75466	4.78949	8.60489	6.55584	20.8266	10.4969	8.59263	11.9439	5.79357	13.0663	13.2464	4.56596	23.543	6.47974	6.84148
Cops2	5.09318	3.28838	9.03947	19.973	3.60156	8.26619	6.3157	6.83543	5.93339	7.07089	7.039	9.00302	7.2305	7.16686	9.76152	5.86773	20.3278	8.81028	4.26719	7.61039	5.06413	5.79345	4.79216	6.39796	7.36265	13.6041	8.76317	13.8852	7.9384	11.9543
Cpe	12.3422	9.29195	10.0854	10.2412	13.2044	8.97992	7.86432	10.8398	11.4052	8.53224	19.4728	12.0326	8.41732	12.5164	7.48577	9.78101	7.82215	7.01314	10.1111	9.47461	9.53144	10.5054	9.46397	7.27434	11.3154	22.5019	9.3681	10.2895	9.28612	5.90855
Cltc	3.93474	10.9739	8.47224	5.88639	4.10697	6.0288	6.80946	5.2745	6.55903	25.5044	6.00284	5.84482	4.91884	6.2704	8.89964	6.50457	7.03953	5.78081	11.7009	7.92622	10.7163	6.9216	5.88812	4.76178	9.53818	7.46721	4.10191	6.19622	8.12741	8.17227
Ubxn2a	12.3815	13.9869	9.78371	21.279	15.5165	12.5689	7.28078	8.16681	10.5129	11.3062	8.75165	10.4797	8.92731	8.72107	10.6234	8.54246	8.37243	6.64087	8.08889	9.63252	13.4195	11.1204	10.186	8.03846	24.7975	12.4526	8.48556	11.7823	7.83979	10.0518
Dnaja4	7.52392	6.15818	7.31767	6.90505	6.14453	9.28364	23.0409	7.93216	12.7899	12.9727	5.77592	8.04556	4.4994	10.7089	5.82495	7.37419	7.74063	6.41837	3.92652	8.42626	5.99884	3.70679	4.65033	6.86853	8.21623	4.51871	6.10729	3.86831	12.828	8.27745
Kif1c	7.57497	12.4219	13.8388	10.9397	13.2044	11.9564	5.43141	8.65651	10.5539	11.7113	7.00903	11.1895	7.02555	8.75517	10.2021	9.36377	17.3359	5.19032	9.37297	9.20704	7.14858	8.18972	7.73192	8.06005	8.50513	14.1057	12.6372	23.9627	6.46741	8.66617
Tmem109	3.59703	3.25444	9.69118	7.84731	7.52148	10.9895	21.2543	7.79443	5.45133	8.80913	5.64747	6.06394	10.0522	8.44336	6.04285	7.4752	4.85471	6.55529	5.24991	5.28999	4.6604	19.1786	7.47835	7.90895	5.81746	6.93072	6.10314	7.03132	5.40732	5.88111
Decr1	7.66922	22.4606	6.33608	9.09152	7.72444	8.36236	9.01794	8.91157	10.3078	8.46045	7.9253	6.15921	5.60519	8.04872	21.0919	6.5968	8.35205	5.16892	8.76587	5.8032	11.0542	5.89524	5.36808	3.93289	9.00415	4.37913	4.34637	4.72505	6.45098	5.8491
Ubl3	12.3815	10.3554	5.9016	18.867	10.6893	7.25886	8.81594	6.24881	7.94366	7.95283	5.45051	8.17417	7.90732	10.6261	10.7444	9.31985	6.00826	10.4534	6.35493	10.0624	10.0229	14.3734	26.1398	6.02669	13.3771	10.1976	5.57694	8.04816	6.52083	10.2393
Pfdn1	14.769	14.0209	12.4268	21.6174	14.4261	9.0103	8.27729	5.86113	5.61031	11.1781	9.44099	8.10272	9.91394	9.72472	22.9076	9.63168	7.13736	8.0144	5.67794	6.95244	5.99884	7.85042	8.5958	7.87873	7.86167	8.30901	6.83651	9.95635	4.25682	9.68142
Maf	12.1537	6.00733	10.0814	8.61494	24.8289	8.34718	8.01245	9.85526	8.54879	6.64017	8.57182	10.4607	7.7834	9.9732	9.10785	6.79444	5.0952	8.01012	9.29436	9.81236	14.0602	7.99038	26.1398	7.39953	10.383	9.13773	10.8763	9.89145	6.81256	9.43904
Csnk2b	8.24647	11.6526	11.4411	20.606	12.9258	5.8162	8.86981	6.87624	7.01545	7.48622	7.07753	10.7608	9.58507	19.693	10.5459	5.42413	7.78547	7.4667	6.17586	3.9653	6.52983	6.44235	8.09724	7.42112	5.94878	14.2365	8.38198	9.80058	5.92915	5.08537
Tmem248	8.44281	4.00489	8.25098	7.73816	8.26169	7.26392	6.40996	7.09049	6.24108	10.2038	5.46336	5.3637	5.61472	5.32521	4.85655	7.11945	6.41995	6.17447	22.6594	8.1236	7.77172	12.961	10.6631	5.15032	12.436	5.90572	7.38758	10.4669	16.8424	7.94361
Hectd1	12.4404	8.57544	13.8388	9.37165	24.415	10.4378	7.87779	10.6459	7.3334	9.32701	8.5076	9.47461	9.55647	7.92204	5.42307	19.1667	9.53006	4.83089	9.98444	9.9308	12.3839	8.68593	10.3837	10.823	8.58392	9.81815	10.0435	11.3107	4.54445	8.74849
Anapc5	11.0267	8.2021	23.2765	11.831	6.21219	7.04119	9.30971	8.85545	6.74365	8.52711	6.88486	8.04556	10.1427	9.1693	9.75668	7.81339	7.90775	11.6258	9.23758	6.76821	11.5545	9.0125	6.49842	5.323	4.0534	6.37678	12.7615	6.79334	16.0329	4.50458
Snrpe	9.38134	12.8556	13.3038	11.1579	5.97739	6.54512	6.63889	7.19761	9.06675	5.84028	21.1042	7.43583	7.66901	7.80024	6.61905	7.07114	6.34251	5.37431	7.49052	10.2598	5.67849	6.0564	7.46115	8.54357	8.66709	13.6346	8.26182	12.7472	4.64717	18.9101
Mrpl33	15.3463	8.9978	15.2106	21.2026	10.2953	6.62105	7.14612	6.77422	6.24108	6.08127	21.1042	11.5277	6.96359	10.3191	12.5602	5.80185	5.352	5.76797	6.97077	6.87348	6.86334	8.61807	7.14741	7.36068	6.50032	11.2968	5.27447	4.08033	4.55677	6.7683
Cat	11.6432	14.5074	12.6158	9.72455	7.83189	10.787	10.4364	7.28943	8.72315	11.1319	7.56564	9.9843	9.76142	9.73446	21.2807	9.69317	16.2394	7.00458	6.69997	4.37762	9.57094	6.04368	5.19186	8.73784	8.04114	9.71347	7.65275	9.11692	7.55216	11.3552
C1qbp	6.55398	13.5231	4.05107	4.26381	6.25198	6.65648	3.87381	6.43755	8.67187	8.42969	5.0566	6.03536	5.35258	6.34348	6.62389	4.6204	9.09391	7.6079	6.41608	6.43045	5.77065	5.768	5.81936	20.9121	7.75223	4.54488	7.44973	4.16254	4.17465	4.4497
Hspa5	12.0163	21.0238	6.29585	6.81409	9.88936	9.50637	5.94762	6.64669	9.94881	5.6403	5.34347	7.95981	9.76142	10.5871	6.34789	9.40769	5.29493	5.14753	19.9034	10.001	6.79313	8.81317	8.3895	5.6511	5.22214	6.55561	5.75924	4.19716	7.88909	8.30032
Cnih1	14.0033	9.61249	14.1606	21.5664	10.3072	9.69872	8.70372	7.79443	6.23082	5.66081	6.36678	8.25991	5.89117	9.92935	7.15651	6.19713	7.07622	10.3207	5.07084	20.8266	9.92639	6.47204	7.03136	5.62952	12.7993	14.3499	13.2918	8.47653	6.20444	6.24696
Samm50	7.46894	22.4606	14.7158	9.86643	14.4301	7.04625	6.74213	6.87624	5.90262	7.33752	5.87011	10.9656	6.36303	12.0633	12.1535	7.35223	7.31671	7.18857	7.34639	8.39995	5.3362	7.03611	5.42395	6.56201	6.24206	12.1865	13.2918	4.05004	5.42375	21.7135
Popdc3	6.71498	4.73271	11.94	11.9474	12.1856	7.00576	8.86532	6.02436	8.43084	7.16831	5.22359	9.55082	10.1904	9.7101	7.32114	7.10188	5.72293	9.49062	6.92709	8.25519	12.1644	13.8856	12.9066	7.70173	23.6025	8.9589	9.89844	8.63663	20.865	7.04727
Myl6b	13.1276	10.016	15.2106	21.9412	15.4966	13.2522	9.88876	8.73813	11.0668	9.99872	7.87392	6.37357	9.25142	6.06577	9.35963	8.38435	8.31537	7.31694	8.94931	9.50093	9.8474	20.171	9.6273	7.2916	11.2672	14.3761	12.9645	11.2458	8.13152	10.0656
Atl2	24.2407	12.0071	14.7842	9.31345	9.88936	7.22342	7.59949	8.20252	6.33339	6.60941	6.73928	11.904	9.81385	10.4555	11.3158	8.81916	7.34117	8.96004	9.6525	6.19359	7.65763	6.95553	8.56142	22.6864	4.59619	14.1755	13.6647	12.1761	4.75811	9.17837
Asb5	7.3315	9.05814	4.22807	13.319	10.5898	6.99057	6.87679	10.8092	7.63084	4.38405	5.4548	5.78766	9.24189	4.84774	8.83185	9.456	17.018	20.7741	9.89709	10.2685	10.9752	7.32876	5.5185	7.67151	11.8013	10.8039	6.1943	8.98279	7.48642	7.65093
Pnrc2	3.49886	4.7855	9.62279	6.47212	5.92565	6.68179	5.79051	9.00339	9.12829	7.96308	19.1132	9.71755	7.20667	10.9915	12.2406	6.96134	5.0096	6.05466	3.97456	8.78595	5.01586	4.95794	7.60728	11.2245	4.5743	10.0668	5.05902	6.48612	4.99643	7.95733
LOC100361920	23.3532	10.2159	15.4158	9.37165	13.1248	8.42311	8.91021	8.19742	10.3488	7.39905	7.58277	7.90741	9.37058	10.2753	9.34995	10.0972	8.07895	7.38968	7.07122	8.32099	7.08715	5.36509	19.4953	5.36185	6.54409	7.60678	6.92352	5.64237	5.44019	5.12196
Lum	9.45988	9.42394	24.7409	9.56083	13.674	10.8478	11.406	10.6153	11.9693	14.0238	5.78448	9.46508	8.40778	9.17417	10.2941	9.75466	7.3004	7.83469	20.7987	9.30354	9.99222	8.81741	10.229	8.34066	10.2604	8.47039	12.343	12.1242	11.5173	10.8567
Ap2m1	10.4377	4.90618	11.1998	6.82137	3.86023	9.19253	7.37505	11.1764	5.4821	4.35329	5.34347	8.46951	10.7957	9.70036	5.86853	12.2274	4.74057	5.71663	7.01881	9.84307	4.19963	7.70198	10.1559	6.78218	9.27992	13.7873	4.03147	6.69382	17.1752	6.38873
Sparcl1	10.4416	19.4739	14.7279	12.4204	14.1993	8.47879	11.3162	6.55487	11.3642	10.4602	7.39866	10.8798	11.034	10.933	9.45647	20.9806	5.47836	8.16844	9.76169	7.75076	8.34221	8.85134	9.73904	7.44702	8.80717	14.3412	8.2784	13.9761	8.96563	9.26526
Pfdn5	7.26475	5.5812	8.1142	4.08918	4.70789	10.3618	16.4424	5.87643	11.5181	11.014	5.79304	10.9942	11.034	11.274	5.50054	6.2674	20.4827	5.54119	6.98387	4.6759	3.79151	11.8371	9.79062	6.38933	11.5036	5.24275	4.90157	4.98467	9.9682	10.4497
Ky	12.3618	22.4002	11.9199	14.1412	9.31629	5.68965	6.80497	6.76912	6.05646	5.74798	7.59989	6.81181	5.34781	8.53105	7.6165	9.04315	20.3074	4.74531	9.46906	6.73312	5.98568	3.99095	9.97542	10.5035	6.78922	13.1287	10.0186	7.42075	4.36365	10.9208
Klf9	3.89547	11.7054	3.49591	6.1265	11.2384	16.9475	6.12268	4.96844	5.32825	5.40443	8.65317	14.8145	4.68529	7.83434	6.79336	8.8543	5.1971	5.67812	8.97552	8.70261	6.23581	8.76652	6.1288	4.75314	4.64434	14.0621	7.99665	8.64528	4.2938	6.01373
Nomo1	13.4496	7.07832	9.58256	16.9097	7.29066	8.26113	9.47579	8.36575	9.64624	10.7473	4.50856	9.82234	10.8291	9.26187	9.18048	10.0006	15.8359	10.3721	8.80081	5.90847	10.7909	12.5539	6.66604	7.94349	9.78769	11.7417	6.74122	10.4669	10.49	10.532
LOC100364403	15.3463	9.75579	14.1606	7.28704	13.1009	5.88706	17.4074	9.70733	10.0206	9.37316	6.76497	10.0843	8.05984	8.81364	7.54871	5.80624	7.2841	5.661	6.09287	8.88684	6.9906	6.22181	9.4167	18.1319	7.96672	14.1101	6.88209	5.22265	6.8783	6.17836
Acadvl	24.2407	4.20476	8.2711	7.74544	6.39127	6.41351	4.84787	6.91195	17.3386	5.82489	2.92007	9.4889	9.20853	10.2168	8.80764	8.0813	5.04221	4.54848	8.27233	4.28551	4.84032	8.13458	5.81506	8.35793	4.52615	7.63295	5.83797	9.93905	5.44841	4.80184
Rpl3	15.1421	21.0464	13.9675	13.8829	9.79385	6.51475	6.7152	10.1409	8.58982	6.21459	9.60369	8.1313	9.86628	6.66991	7.10809	10.1675	9.04908	5.13897	7.97533	9.51848	11.7212	22.4019	8.25197	10.7367	8.22498	11.9641	14.1081	13.2968	9.59429	9.7866
Vezf1	9.37741	11.2341	14.3578	20.606	15.5205	8.55472	6.73764	9.20743	10.5129	9.07063	8.35346	9.86521	8.97974	9.40803	11.34	10.1807	9.96214	9.14403	9.72675	8.97895	14.3147	12.9865	10.186	10.0157	24.7975	14.4633	8.6513	7.08757	9.86958	10.8567
Mapkapk2	12.138	7.62136	12.0647	6.51577	8.97006	5.65928	7.63989	7.22821	5.87697	6.35816	4.82111	11.0561	10.2809	11.0499	7.35503	20.1901	6.78681	6.78207	7.55603	7.85165	10.5495	8.5078	4.7148	7.9219	7.10001	12.8234	13.4783	11.7391	15.8768	11.2317
Cacybp	5.95317	4.66483	4.15566	6.61036	5.79433	6.68179	8.07978	6.85073	6.47185	6.71196	11.7317	7.16907	4.95697	10.1388	9.49037	4.87952	5.11151	7.77906	4.94418	4.46535	5.81892	25.3241	7.91243	7.99529	10.1729	4.66264	9.95231	8.58903	6.49207	8.30947
LOC100911485	5.91782	10.4346	10.544	12.9297	14.2232	7.07663	6.32916	9.82976	9.56419	7.81951	7.95099	9.06495	9.66133	9.88063	8.23628	9.6756	12.8644	4.8694	8.77461	7.72444	11.2868	8.32543	24.7129	4.58046	7.32763	7.48465	3.83259	6.80199	3.57064	8.17684
Kars	7.26475	4.23493	4.32462	5.43527	7.68863	7.74987	9.01794	7.70771	9.53855	7.93744	6.1998	8.25515	7.42116	9.40316	4.60961	5.49441	8.03004	8.22407	9.28999	7.74637	11.7081	22.474	11.8235	8.92347	9.70452	5.92753	7.23842	8.08278	17.4012	8.63873
Ost4	14.4706	10.7702	15.3876	20.8716	15.5205	8.52435	7.22692	7.50877	5.4821	7.80925	10.1475	10.5083	7.66424	10.7966	8.63333	7.73872	6.72974	10.0897	8.1675	9.95273	8.64939	10.4884	5.76778	17.834	4.15845	8.9938	10.955	8.4722	4.17465	7.42684
Atp6v0c	6.91525	3.59007	5.02863	4.45299	8.03883	9.15709	9.19749	7.75362	8.67187	9.38854	6.70931	5.28272	7.41162	4.50182	7.23882	8.66983	8.9431	4.43723	8.55186	7.14105	6.89406	4.41507	9.33504	7.58517	22.5344	4.77168	6.9401	5.80679	6.76736	24.1235
LOC100910944	8.35249	21.3028	8.7981	13.8756	12.0702	5.78076	7.24936	5.65708	8.66161	6.32227	6.19552	5.84958	6.24388	8.37515	9.97941	4.62479	8.25015	7.44103	7.01008	22.3531	8.24566	7.67229	6.26204	8.00393	7.92295	14.1057	4.67369	4.71207	5.00464	6.00916
Timm10	8.01478	8.65463	8.41994	21.1044	13.089	6.18066	7.71171	6.59568	7.72827	7.97846	9.17981	11.5658	9.23236	9.4665	8.98195	5.62617	8.82081	11.6044	7.38569	6.00497	21.8275	9.10581	10.6459	7.67151	12.2215	7.62859	8.01322	5.3265	6.38523	8.67532
Mea1	14.1761	9.5333	13.9675	14.5086	23.4519	6.77797	7.93166	8.26883	9.22572	6.75811	7.53567	9.90332	8.39825	7.51278	10.5556	6.29814	5.88598	9.81154	5.55128	9.66323	9.10139	6.13274	4.07441	5.323	7.96672	10.4288	10.8928	5.93227	16.0329	5.84452
Mlip	14.4902	7.33098	15.0738	13.5445	14.7763	5.75039	5.39999	7.53938	6.83083	7.64517	6.59371	6.86421	5.86257	6.71376	6.83209	6.96134	7.80177	18.4207	8.08452	7.13228	9.82107	10.3697	10.1344	8.69467	5.27905	24.7133	8.38198	11.3496	7.31385	9.86892
Glrx3	5.98458	4.67614	4.70278	3.65262	5.26106	9.31908	6.98004	7.25882	8.04622	7.73234	4.88106	9.16498	9.64226	10.7284	4.69192	7.92319	8.40504	11.352	7.28961	6.255	3.83978	8.47812	23.0797	5.57771	6.22017	4.48817	7.88064	7.62844	17.9354	8.84453
LOC100359716	12.7388	6.61071	12.5837	7.76727	14.442	8.70658	8.50622	9.29925	6.37954	9.05012	8.75165	10.4797	10.1141	9.78318	9.54363	20.537	8.38059	10.723	8.56496	7.5753	12.419	11.1204	13.2203	7.49451	4.93324	9.59571	21.736	12.9809	6.82489	7.62806
Vcl	9.45988	8.31147	16.9606	6.70131	12.5199	8.70152	6.47281	6.52937	6.50775	9.26035	6.7821	11.5896	8.84152	9.97807	7.06935	8.80159	21.6281	9.88856	9.09344	9.81236	11.8046	14.3734	7.88665	6.50589	13.04	14.9126	22.0177	15.5771	5.80588	13.8887
Psmb2	10.0332	10.9173	5.60391	8.60038	3.01257	7.8916	8.05734	5.58567	7.75391	8.00923	10.5457	6.34022	8.6318	6.2168	7.30177	10.2861	13.3535	20.9324	11.1506	8.25081	13.7486	8.71138	14.8836	4.53297	11.7662	11.541	4.79385	8.97413	7.33439	6.0366
RGD1566359	9.13002	6.78795	8.91074	18.4232	11.6563	7.68406	8.52417	10.2276	9.72829	3.82002	7.87392	6.91661	7.55461	7.55176	8.72533	8.76645	9.52599	7.56084	11.1419	6.63223	10.0229	11.9813	24.7129	8.56947	13.9855	3.73796	5.12531	10.9256	7.28919	5.00763
Cd24	11.5136	12.7651	11.6141	9.02968	10.6694	13.7078	10.3062	9.40637	11.6257	14.0238	7.02187	9.15545	9.06554	6.933	9.09332	6.12686	9.33441	8.29253	21.55	9.05791	11.787	10.077	9.94964	9.45016	11.3066	10.8519	21.0482	11.4362	9.51211	9.12349
LOC100910881	21.4565	6.4938	9.34521	11.9947	12.3726	7.72962	8.16507	8.91667	8.78469	7.77849	9.09418	9.26978	21.1529	10.2119	10.1586	9.60094	9.32218	4.91219	9.30746	10.1457	9.24181	12.1679	12.3006	10.7367	10.1116	10.66	4.7607	8.73615	10.9543	11.6799
Fyco1	16.2809	9.99714	11.6785	9.94647	7.21505	7.96247	7.27181	23.4394	4.93851	10.291	8.21645	9.84616	6.21051	9.19366	2.33386	9.79858	6.34251	5.10902	10.2509	7.027	6.6922	5.70438	6.30502	6.03101	5.11271	7.48901	4.64883	8.68855	6.23731	4.9619
Pptc7	11.6629	11.2567	10.4153	19.2999	6.1326	7.75493	8.64537	7.1466	9.87701	10.5627	7.41578	6.74512	8.97021	10.3337	11.0979	6.03023	7.66318	7.96305	21.55	9.85184	11.0893	9.72926	9.96253	7.56358	11.6743	9.19007	5.2289	12.3102	7.54395	5.46495
Hmgn3	12.0163	10.016	15.1543	21.9412	14.5017	6.454	6.98004	8.99318	9.04623	5.88642	17.559	6.73083	9.91394	10.134	8.77375	9.49553	6.82757	4.47574	6.14091	9.02281	8.58356	10.3018	5.96119	8.97959	5.46727	9.18571	13.2918	5.37842	5.88395	7.32623
Cnst	11.4115	3.4166	12.1492	8.10197	7.5175	12.0222	7.74762	8.91667	10.3642	9.99872	5.20646	7.84073	9.68516	11.0451	7.81018	10.4837	6.0531	10.6459	22.6594	8.29467	9.75086	9.72926	9.16742	3.95879	6.39526	12.3087	5.56451	7.23902	20.6678	6.18751
Ginm1	9.88791	7.94567	4.12348	11.1034	11.724	10.0328	8.76208	4.87662	8.33854	11.3421	8.64033	9.24596	5.23342	11.5712	10.8026	20.537	10.2678	6.03326	8.57806	6.43923	11.6686	7.48144	11.2863	9.55809	11.7531	12.1517	7.99251	7.92268	8.91221	21.2058
Lgalsl	10.3081	11.5395	5.9016	21.1044	15.3693	7.4259	8.34911	6.29472	8.81546	8.07589	6.13129	8.51238	7.75957	10.8063	10.6137	6.49578	4.34519	9.3537	5.84391	10.1852	9.44368	10.9677	21.7302	8.70762	5.44976	8.88475	7.15555	8.43759	7.12484	4.72409
Igfbp7	11.5097	13.3572	15.2106	20.9189	14.5017	12.2753	7.29425	8.47798	11.3386	10.4346	7.54851	10.5369	10.4287	11.8928	9.51458	8.82794	7.85476	7.7106	5.49013	7.65426	8.93024	22.8727	6.48983	7.31319	8.26	13.6346	7.91793	10.7179	9.38063	11.3643
Zfand3	8.22683	12.2032	14.2934	14.5086	14.1993	13.9052	8.74861	10.4521	9.8924	11.4703	8.68743	9.41268	8.38395	11.6833	11.3739	6.02145	7.47975	6.09745	9.82721	8.79472	8.03064	10.4036	24.0296	9.3336	8.47011	13.2072	11.821	13.9761	21.1115	7.67837
Emc6	9.56198	13.3572	24.238	5.02417	9.59884	5.84151	6.30223	7.54958	6.48724	6.73247	7.65127	10.6702	6.04846	6.3581	10.4975	8.99923	5.97158	18.763	4.42443	8.36485	5.12556	9.65292	6.44255	3.72999	6.60537	14.1537	9.3018	5.12313	9.21627	8.63873
Cd59	4.68085	3.08852	5.68839	5.84273	4.38156	8.39274	7.1147	7.28943	5.33338	9.61928	5.68172	8.7839	4.82828	5.83678	8.47354	4.71702	6.09386	9.41788	6.6694	18.0807	6.70097	8.19396	12.7991	13.2881	8.99539	7.65912	6.96496	9.26404	8.40271	8.80337
Rnf10	6.65608	4.47627	4.13555	4.16195	6.79321	5.59347	4.90174	11.6916	8.58982	5.44545	19.126	4.52533	7.84059	4.88185	7.51482	7.43568	6.46071	4.4843	5.24991	4.85574	3.76518	4.9028	4.93829	8.17229	4.25913	7.34072	3.98175	4.13658	6.4592	21.7135
Lman2	4.72012	19.274	8.65327	8.9169	4.71187	7.00576	9.37704	7.35064	8.37956	7.30163	6.32825	9.9319	5.12379	6.94762	10.4927	4.42276	5.70255	19.1353	7.16731	5.7374	10.2248	10.5224	11.2003	5.47842	11.1096	8.30901	4.32979	4.63418	4.84029	5.53812
Ssr4	7.4768	3.19788	8.42397	10.4012	12.2174	5.4568	5.9566	7.55468	6.02569	7.61441	6.21264	7.34532	7.77386	9.36418	4.08183	5.63934	18.73	16.7091	4.54235	7.00069	6.70536	6.78589	6.17608	7.10597	4.84132	3.8819	4.42923	6.50776	5.29227	5.27288
Eno1	14.4942	10.016	15.2106	21.9412	15.5165	12.5689	7.28078	8.62081	11.5181	11.9626	7.39437	10.5607	9.86151	9.17417	10.8122	8.33604	7.90775	8.9686	8.84012	11.0406	12.6866	8.07096	10.0614	8.51335	22.5344	13.8614	10.8763	11.8516	9.57785	10.5412
Psma2	6.77781	10.593	10.5642	12.1584	9.75803	10.4985	9.52966	8.72283	9.24624	6.32739	21.3482	8.26944	8.52694	11.6395	8.50259	5.47245	19.3495	4.76243	7.04502	10.1808	14.3147	13.8856	12.0814	7.28729	12.4929	14.1057	4.50381	6.33901	9.16285	9.51221
Rdx	10.7243	4.23493	12.821	5.8209	8.95813	6.59068	8.92816	7.97297	5.34877	7.12216	9.44099	9.3841	9.81385	5.84165	10.3765	20.2252	4.67536	10.0854	8.97115	10.1808	6.4289	8.94889	9.12874	4.94741	10.151	9.41688	7.59889	6.71978	21.3334	6.50763
Ctsl	7.79488	3.8729	11.2078	2.64487	14.9037	5.6694	5.53465	7.61079	7.16929	5.75311	6.52092	5.25414	8.75573	5.27162	4.69676	9.60533	12.7135	6.46543	11.3297	21.0196	6.56055	5.98006	5.3208	6.86421	9.64761	14.3499	9.57526	7.9097	6.48385	5.85824
Map2k3	11.3094	22.4606	12.7808	7.40346	12.496	9.64304	8.85634	6.32022	6.30262	8.01436	5.63462	6.39262	8.84152	8.26796	5.04055	9.70195	19.9324	9.86289	8.90127	9.74657	4.70867	9.18215	8.83648	9.94231	8.00612	11.7635	10.8141	7.23469	6.58246	5.80794
Cops3	10.1471	3.81634	12.3745	6.44301	4.25819	5.4568	5.5571	6.83543	9.15393	6.40943	5.1979	8.42187	9.61366	6.38733	4.90981	9.7327	7.42269	6.43548	4.76074	4.39517	5.34059	7.00219	8.12303	6.29867	20.3151	8.91965	20.6877	4.32697	9.0437	7.79727
Spop	4.70049	5.90552	5.8654	5.17333	8.13832	9.82527	5.97904	22.7355	6.83083	9.16293	7.56992	4.77779	4.00847	4.40438	5.14223	5.30994	7.86699	5.31441	6.57768	19.4931	11.5369	13.3258	8.12733	8.12481	8.26	5.10317	8.50628	5.85871	7.19058	8.52898
Fam127c	9.59732	13.7343	11.9802	21.5664	14.5296	12.5689	7.76557	7.45776	11.5181	11.378	8.70027	9.59369	9.65179	5.5883	8.75438	10.2905	7.33301	8.28825	11.4563	9.07984	10.4705	9.97101	10.9811	18.1837	11.2672	11.746	12.8319	9.10827	7.67132	8.9863
Mef2a	6.94667	9.35983	12.3503	18.4486	4.73575	8.3573	8.80248	8.20252	8.32315	7.46571	6.25118	10.4988	9.17993	9.57368	9.04006	8.4107	9.65235	10.3421	7.75694	8.11483	12.6033	10.1703	25.2545	9.27316	14.3445	6.67774	9.40953	7.08325	8.48078	5.98172
Rnf115	7.29616	4.97783	8.14236	5.21335	7.74434	12.3461	5.88927	8.53919	10.7129	12.2292	6.65365	5.12077	6.68714	7.50791	4.59024	5.23528	7.10882	5.89634	20.5542	7.71128	9.66309	4.82646	10.8049	7.17936	9.04792	6.12817	20.1574	4.74668	6.28251	5.35519
Phtf2	14.0858	5.45299	4.67864	9.64087	7.48567	5.32519	9.72267	7.42716	7.15391	8.21946	6.47382	6.92137	8.98451	4.51644	7.07904	5.56029	7.56128	20.2906	10.0543	4.73731	7.08715	4.84767	7.86945	8.77669	6.71918	10.4375	13.4493	23.9195	5.57167	4.71037
Ube3a	10.3395	6.38821	6.04241	10.4776	10.0883	8.69645	8.64986	9.76344	8.42059	8.74247	5.75023	10.9561	7.2877	10.0999	11.34	11.6169	16.4188	21.5914	9.84905	6.64539	10.532	8.4145	7.09583	5.39207	13.0663	9.30784	8.24111	10.3717	4.40474	5.94056
Psmd6	10.0332	6.92371	7.49065	4.75495	7.35434	8.1852	9.28726	9.91648	7.00519	7.47596	5.90008	7.49775	7.94069	10.4945	9.46131	6.29814	21.0656	7.75767	10.3819	7.47003	4.61652	5.01731	3.04721	7.71036	6.137	8.40497	6.8738	20.2199	5.20187	6.50763
Bckdk	14.4431	13.7343	3.68498	12.0238	14.0162	8.8635	15.3112	6.09068	6.70775	9.70645	4.2645	8.01221	9.68039	5.18392	8.74469	9.75466	8.33575	10.663	9.32493	4.18462	6.99938	6.41266	9.64449	6.89011	11.7575	10.5684	10.7395	7.44238	21.1115	6.99239
Sspn	11.3683	21.8723	12.6359	8.94964	9.76997	6.3882	7.65784	7.41695	6.82057	7.57339	8.36202	5.33512	10.7671	7.76613	9.11753	9.21883	7.05991	8.60489	6.97077	7.34721	8.27199	22.8939	8.67746	4.35597	10.7551	12.5137	7.32128	10.7439	7.7083	10.468
Ids	7.75953	11.4754	8.73373	11.0233	3.72492	6.03892	4.33166	6.6722	6.56416	6.74272	18.3596	7.41677	6.43453	6.07064	6.13	7.30831	6.02864	6.70077	8.4383	6.24184	6.37185	7.0658	19.6543	6.1044	6.12825	11.5672	3.87817	7.20007	4.92657	7.0427
Erlec1	9.02007	6.7427	6.26769	9.63359	5.11779	7.4664	9.08527	9.10031	9.72829	8.1528	8.8801	9.53653	9.41348	11.4348	11.3933	9.95669	7.24334	21.5914	10.015	9.44391	11.7168	9.72926	12.292	7.55063	6.22017	9.29911	13.0225	11.4621	15.959	10.9528
Perm1	14.0858	4.74402	4.15566	11.831	9.34415	11.5565	7.17754	10.5898	12.2565	10.1474	8.61892	8.85535	10.2381	7.42021	5.15675	9.1837	8.62923	7.97161	5.29796	4.58817	9.73331	11.5021	8.89665	7.16209	23.7645	10.5989	12.285	21.6219	7.74939	13.1662
Mrln	7.84593	9.4805	8.20673	10.0083	11.8593	13.1611	11.406	7.37104	11.8668	10.5576	6.69219	11.0799	7.64041	12.0633	11.3013	10.5672	8.9431	9.55481	10.312	22.4101	9.83863	11.9813	8.58291	10.3006	10.8514	13.2813	6.73707	21.6435	9.76686	10.9208
Ss18l2	11.9338	14.5074	15.2106	21.9412	9.98885	7.14749	7.24936	7.95257	9.50265	6.59403	5.87868	10.3654	5.76248	9.91473	10.7106	6.55288	5.53135	8.96004	5.28922	6.00497	21.8275	9.91163	9.43389	7.17936	7.56401	8.36135	6.86966	5.76352	4.5691	4.48172
Msrb3	9.10253	6.7427	12.4227	11.831	12.3488	6.45907	8.76208	7.12619	8.09238	6.74272	8.88438	7.14049	8.14564	8.38976	6.97251	6.22787	9.49338	8.49792	7.39443	7.90428	25.4435	8.16003	12.6401	10.3395	8.78528	7.01795	11.129	23.543	5.64152	11.2317
Psenen	9.56983	16.8492	13.1227	10.3867	11.9787	8.33199	8.63639	7.1568	6.50262	7.07601	8.58895	7.34532	8.40302	7.14738	6.46894	8.97727	7.25149	10.2993	6.30252	8.29467	6.7668	9.12277	11.1831	17.5447	9.80957	5.65711	8.99519	9.69673	5.52647	9.79118
Mrps21	10.9364	19.3758	12.4187	10.9251	15.7474	8.60028	5.3551	5.49895	6.118	7.94257	9.32967	5.72097	6.56322	6.64555	6.09127	10.8175	8.58847	10.0768	4.66465	23.2654	8.58356	12.3927	13.3407	9.13069	11.1622	12.3741	6.81165	4.80726	6.76325	5.44208
Bola3	6.82101	13.0253	12.2015	18.7833	14.5535	9.98726	5.79051	9.19723	11.2822	7.9118	7.26164	8.60289	7.3163	9.13519	22.1184	7.5323	8.14417	7.53516	10.2028	9.33425	10.9313	8.73683	10.4654	4.28689	4.08404	10.7908	13.2918	7.98758	11.205	6.84148
Psma1	14.4706	13.7079	14.7802	8.68406	10.5858	6.88933	5.61096	5.78971	9.3129	7.02474	6.19552	7.31674	9.31339	7.24482	6.86599	11.6169	16.4188	7.73627	9.9495	22.3531	9.89567	10.4418	12.4123	4.67543	11.6831	7.63731	10.176	9.75731	9.17107	9.43447
Cdc34	14.4706	6.41461	14.7279	9.72091	14.8758	6.87921	5.64687	9.16152	9.29239	7.7067	6.64937	5.82576	6.85397	5.29598	6.12516	7.07992	4.99737	7.10727	21.55	8.72015	9.47439	12.961	12.4123	6.23391	13.8017	4.00403	9.42196	7.07892	21.3334	5.60214
LOC100363335	11.9613	19.5908	11.409	11.318	8.43282	5.87694	6.74213	7.53428	6.43595	6.30688	18.107	12.628	11.2104	9.97807	10.2941	4.29539	7.35747	7.56084	8.91	5.84706	9.12772	7.96493	9.58002	7.719	7.24884	12.3697	12.459	11.7261	5.77712	11.3461
Rbbp7	13.697	19.6134	14.7842	7.70906	12.8144	7.05132	6.08677	9.0952	6.25647	6.13255	8.85441	8.85535	8.1504	8.40925	7.95544	4.40519	9.03685	5.45133	7.60844	21.0547	6.75802	7.7147	8.35082	9.49333	9.66074	12.2912	7.80606	4.21879	10.0175	8.64788
LOC100910855	6.11809	12.1278	10.9061	12.2239	6.9126	9.36463	9.8708	8.88606	10.3334	6.97859	9.88628	8.93633	9.66133	10.5237	10.2941	22.4476	7.27595	6.44404	7.06686	10.3387	12.6823	11.4088	12.1373	7.30887	8.1243	9.91411	12.8071	24.5166	8.41914	10.2211
Mmadhc	6.92311	6.39576	6.5332	10.5759	7.78812	8.31175	6.01046	8.41166	9.21034	6.46584	5.17649	5.08266	6.41546	7.70767	6.1639	8.36678	21.0656	9.52058	7.23283	19.2958	5.91546	6.28967	5.08871	7.28297	7.13503	10.8432	3.96932	6.53372	8.1685	6.51221
Ctsd	11.6432	9.29195	11.7026	4.9987	8.15822	7.60813	6.42792	6.59568	5.50261	6.49147	19.6741	9.12211	8.33152	5.7978	9.09816	5.06838	7.05991	4.12487	7.58661	8.84297	7.65763	8.46115	7.75341	8.13776	9.3806	12.0339	12.4963	8.11306	11.657	25.0061
Ociad1	8.27003	4.88355	9.4136	3.21241	12.8979	9.8354	11.6528	11.6916	11.4206	10.573	6.52948	8.56954	11.1532	11.5225	10.2118	9.80297	21.0656	4.89507	6.74365	5.36456	7.28901	9.08036	4.79216	7.28729	8.46574	24.6043	10.3956	13.3444	9.86137	9.73172
Ppid	3.8405	8.27375	24.061	8.54945	9.26456	7.88654	5.88029	7.78423	7.68212	5.92744	21.0528	9.44126	7.69284	10.514	11.6741	6.21909	7.23111	9.16543	6.08413	6.0927	6.93794	8.44843	5.09301	8.09459	9.33244	5.49572	5.97056	4.19716	8.99028	10.0976
Spag9	9.04755	5.947	11.4854	21.2026	14.3107	8.65596	9.63739	9.41657	12.0257	8.8604	7.4586	10.6655	11.6679	10.8989	9.82447	8.97288	7.36155	7.12867	9.72675	9.90887	8.1184	11.8499	12.6659	18.7449	12.9919	13.2901	13.2918	10.2722	7.85622	10.061
Fbxo3	13.0255	9.68414	8.60097	6.75225	13.1964	7.23355	9.46233	6.72831	6.78468	6.94783	6.91483	10.4749	11.7728	11.8928	6.83209	7.08431	8.27053	4.5656	12.2207	8.92193	7.6664	6.29815	9.07287	20.9337	4.22411	7.23604	4.27179	5.17073	7.1536	3.24696
Psmc3	14.8436	21.8723	9.7475	14.1412	14.1913	8.91412	5.12617	7.02927	5.57441	7.90155	7.39009	6.05918	6.92546	5.98294	8.34765	4.93223	9.42001	7.08588	4.76947	16.256	6.79752	9.02099	8.96112	6.26413	7.15254	8.88475	8.42341	13.3444	4.72113	4.8933
Cmpk1	2.40718	8.83565	4.52577	8.06923	9.70231	5.9883	6.00597	7.82504	8.877	7.58877	6.77782	5.49708	5.36687	4.9598	5.27296	4.78729	4.63867	5.04912	6.94019	17.3526	4.62091	10.0304	8.15312	9.01845	9.88399	4.46637	4.1972	4.3486	14.8414	6.62654
Cops4	2.90983	5.33231	7.12457	3.48163	6.94046	6.06423	17.8025	7.44246	7.08211	7.02474	7.91245	6.94042	8.40302	7.64433	7.61166	7.04039	5.69847	5.39143	15.2256	8.65436	7.67957	8.35088	6.01706	4.39482	9.34995	8.46603	9.85287	11.3886	2.42014	4.73324
Saraf	4.78295	9.04306	8.14639	13.9993	12.0821	8.15989	5.40448	8.82995	8.9488	3.3124	8.51616	6.98806	7.18284	22.3289	5.9799	9.21444	13.6388	5.28446	5.74346	5.32508	7.85949	5.59836	5.06722	6.55338	6.54409	14.4503	10.781	4.06302	7.88088	6.36129
Cct4	8.83158	8.37557	7.39008	16.5932	6.0729	9.54686	8.32667	5.69279	6.49749	8.804	5.35204	10.8227	6.14378	13.106	11.3061	10.0577	20.4419	6.87193	8.39462	4.47412	12.691	10.7556	4.25922	10.3568	9.87085	7.9121	4.57839	7.81883	5.21009	4.87044
Cul1	5.87463	6.34296	8.28316	21.1044	12.7069	8.01309	5.78153	5.65198	8.38469	7.77849	5.93862	11.0323	10.7957	11.9123	8.75438	10.3695	20.3278	4.9507	10.1286	7.3823	9.63237	5.891	10.5771	10.0114	6.68854	8.77571	14.0335	11.1982	6.414	8.19971
Cox14	5.1992	9.06191	12.5394	12.6859	12.3527	5.40112	8.92816	8.75343	6.03082	5.77362	8.32777	6.52123	6.13425	6.51888	8.64785	5.16501	21.0656	9.30235	8.90564	22.8093	7.82438	3.93157	6.61877	6.51021	7.01247	8.2305	8.99105	10.1987	8.00003	8.67075
Aes	5.51335	7.71563	8.23489	18.0557	9.80976	5.41124	4.45735	6.81503	6.98981	7.67081	5.54899	10.1415	9.76142	9.29597	7.4664	5.09473	8.45803	9.10552	4.34144	6.36027	9.73769	10.8956	10.8264	20.9121	8.26	4.91562	7.47044	6.20054	5.78123	7.49087
Pmp22	11.6629	6.87468	12.0325	10.8851	11.907	8.3978	9.88876	8.28924	6.81032	6.42994	6.67506	5.60188	9.5231	9.9196	7.01125	20.1989	6.46479	6.72645	9.50837	7.86481	12.691	8.07096	7.69754	6.60518	12.1208	12.9237	7.53674	12.7775	16.2219	10.9208
Fam89b	5.05391	5.71696	6.16712	6.48303	4.36962	7.58282	20.5406	6.1876	5.63082	9.90129	6.735	9.4365	4.77585	9.83678	7.72303	4.62479	4.42671	7.39396	3.70813	4.71099	3.81784	12.1849	8.29924	9.3336	6.08885	6.75625	3.97346	7.9097	12.8444	5.26373
Grb10	12.9784	12.2334	9.7998	11.147	7.14342	11.5514	11.6708	7.37104	8.88726	12.3215	7.73262	9.5794	9.81385	13.106	8.69143	9.80736	7.39008	10.2523	21.1001	5.86022	8.33782	8.39753	7.80069	8.64286	10.186	12.771	11.8251	6.21353	18.2764	9.40246
Smarcd3	7.26867	9.77087	8.62511	7.27613	9.55109	8.37249	17.9281	6.36103	6.00518	8.45532	7.15888	10.5607	7.57845	10.3873	10.2021	5.64373	7.59389	9.25956	5.23244	6.00936	8.96535	8.0031	12.292	17.562	6.29458	7.98625	5.8504	5.24428	3.92811	4.75153
Serpinf1	12.4404	7.46674	12.0647	21.5664	10.4783	10.8782	12.0479	8.23312	12.4616	11.0396	8.1565	10.3082	8.59844	11.2351	10.4104	19.4917	7.87107	8.97288	9.62193	10.6414	11.4491	11.4978	5.60446	7.20958	10.418	14.3499	12.3472	10.2982	8.60815	10.3354
Ipo5	13.8816	8.43591	11.6141	13.2498	14.3107	10.1391	6.69276	12.2579	10.918	12.2292	8.75165	10.0272	9.86151	9.8855	6.23168	8.98166	7.76916	11.6044	9.35987	10.1282	9.30325	6.98098	9.71325	18.7924	11.2979	13.2377	6.9401	11.6871	7.65078	21.8644
Capns1	16.9524	10.3667	10.5561	10.8887	4.0035	5.1632	6.92617	5.42244	5.14876	5.98897	6.38391	7.2834	10.5955	8.53593	9.46131	4.92344	6.49332	5.45561	2.75162	6.56643	8.50019	6.71803	5.63025	18.1319	8.71524	11.4451	7.48702	4.8938	7.19469	5.0122
Slc12a2	9.86435	10.016	12.8572	20.1658	12.0264	13.2522	12.0479	10.0542	12.1027	10.9524	8.61464	8.7839	8.37442	10.5091	9.85836	8.7972	7.86699	9.34942	8.04084	8.36924	6.95988	10.094	23.2258	7.80966	9.78769	12.8234	8.38198	12.5612	7.40835	10.8064
Ube2e3	19.0886	7.57233	10.2705	13.5445	10.5102	6.91464	5.92518	7.47817	6.65134	6.18895	7.82682	10.0415	8.79862	12.0536	11.7225	6.35963	6.04902	2.62725	7.36822	8.04903	8.28516	4.33448	3.57155	8.21978	8.23811	13.6172	10.0932	5.75054	14.1593	4.80641
Zfp238	10.6929	11.4565	13.6175	21.279	7.61699	9.75947	7.41545	9.84506	6.63083	11.8293	10.2759	10.0081	11.4678	10.894	20.7287	11.2787	6.19984	6.51678	9.13712	9.72025	10.0317	6.25998	11.8579	8.02551	11.6393	9.6306	11.8251	7.07027	8.23013	10.1387
Anxa11	11.011	11.6036	14.048	7.31615	12.3368	10.0429	11.406	7.08028	12.2104	9.15267	9.52234	8.09319	10.1332	10.5871	10.0085	6.77248	6.65229	6.76068	22.4148	10.3519	8.98729	10.094	9.79491	8.76374	8.36943	10.9522	5.8794	8.89625	21.1115	11.6296
Prss23	10.9796	10.2159	12.2015	5.90094	10.2993	6.56537	7.83739	7.1568	6.54365	8.83476	5.08658	5.27796	6.01033	10.056	10.9091	8.54246	7.76916	7.20569	5.78713	8.74208	13.2615	13.7796	8.35082	18.1319	11.6349	4.19594	9.68299	21.3925	7.94662	5.49239
Myoz3	6.19271	4.15573	6.93147	5.30794	7.18719	8.30668	21.0119	9.72774	5.22569	8.58864	8.16507	6.61651	5.17622	5.20828	6.41084	7.29513	7.6428	7.32122	6.01425	4.50921	10.0537	4.09698	4.65463	7.05848	8.13306	10.7559	4.09776	5.1015	16.8424	5.36434
Slain2	9.62873	9.55592	6.78262	4.98415	9.32027	7.4664	8.57355	7.42716	10.0052	7.78362	8.25498	10.2511	9.37535	11.6443	12.5602	10.4354	8.59662	20.021	5.70852	10.2203	14.227	12.486	12.6702	7.72763	10.1291	11.432	12.5999	11.4535	11.5173	23.2729
Rab21	12.4757	22.4606	9.78371	14.5086	14.8758	8.00297	7.29874	9.40127	10.0206	6.8504	8.60179	10.8941	7.49265	9.48599	10.4927	9.05633	7.67541	5.42138	8.3029	10.2335	8.81615	8.70714	4.88671	17.998	9.78769	10.6338	12.0323	8.86596	8.43558	9.70429
Snrnp27	14.5845	7.40263	9.94865	7.88732	23.1375	10.2808	8.25036	7.77403	9.75393	10.3012	18.9034	13.133	11.9301	6.91839	11.2432	8.23502	6.63599	5.08335	11.714	8.59733	11.8221	13.8856	12.7003	8.23273	8.79841	11.7678	7.97593	3.99379	6.93994	8.81709
Sdcbp	9.31458	14.0888	15.2106	21.5664	11.7876	10.296	5.94313	9.70223	9.86163	5.94283	19.126	5.43992	8.93685	11.1133	7.96997	6.61876	6.73789	6.45688	11.0414	9.25091	14.3805	12.503	14.4323	6.3073	11.4511	14.1755	9.48411	6.00583	9.01082	7.00611
Aqp4	6.88776	11.1398	6.37228	9.56083	6.68974	7.40565	5.50772	11.5998	27.149	9.67568	10.5842	7.81691	10.4287	9.676	9.69857	10.2685	7.4716	7.26131	10.4824	10.0624	3.76518	5.00035	3.59304	8.46154	11.9151	6.19796	2.90863	8.66692	9.26558	12.4299
Fam210a	6.65215	4.76665	11.1153	5.72631	8.61588	6.78809	5.61545	7.60059	8.20007	7.58877	4.78686	8.82201	6.8492	6.9866	9.24826	10.8131	6.80719	7.03025	10.395	9.35179	10.7558	5.95461	8.5872	18.1319	12.1208	8.13018	8.80874	22.8637	5.65385	9.43904
Gpcpd1	7.26867	21.0464	9.96876	6.19199	13.3158	5.65421	9.41744	7.42716	6.24621	6.25048	5.42482	11.5658	9.76142	4.16078	6.406	6.42551	5.45798	5.47701	5.56002	6.84716	9.46123	8.30423	11.5699	7.33046	11.0527	4.46637	4.10191	11.9208	9.61072	8.01678
Gnb1	11.0031	6.72007	8.9751	3.75084	7.37026	7.34997	4.4349	6.16719	5.73338	6.10691	7.30874	8.66957	9.55647	6.52375	10.667	4.91905	16.5207	5.00205	7.40753	6.8998	4.69112	7.40086	3.73487	7.79239	6.6579	8.39188	8.17481	7.99191	7.52751	17.0671
Tm9sf2	8.55669	4.39331	8.17857	3.52165	7.63291	5.48717	6.3965	24.0821	6.49237	8.89117	5.99428	11.4943	7.6833	6.03166	7.41314	4.57208	4.87101	5.67384	6.44228	6.96559	4.63407	4.53806	6.90243	5.00353	12.6986	8.88475	4.36294	4.65149	5.66618	8.17227
Net1	13.8776	9.77465	11.9199	8.29479	4.81932	6.88933	8.44786	8.91667	7.34878	8.87066	5.96859	6.20684	10.2047	10.1973	9.08848	9.43404	6.25283	9.53769	7.16294	9.44391	11.2912	6.47628	23.849	8.44859	10.1422	5.59168	12.7698	12.8165	20.7623	11.6296
Rnf11l2	9.0829	3.86159	11.236	3.36521	7.50158	24.672	9.03589	6.08047	8.23597	4.69171	10.2759	5.49232	5.68145	9.85627	10.3135	22.2455	7.31263	8.4808	11.0108	11.1502	3.67742	9.67837	3.95837	4.98627	8.47011	5.77923	6.62935	8.22124	5.04573	8.95886
LOC100912578	8.13652	8.46231	4.4614	9.1279	9.32823	7.7853	8.86083	6.92215	8.12828	5.41469	9.33823	6.80228	4.78538	9.44701	8.50743	19.5664	8.10341	7.44531	8.51255	8.37363	11.2078	14.3903	10.8866	8.16366	14.3445	6.14125	8.84189	10.5145	8.88756	22.3583
Pacsin3	12.2166	10.2196	6.89526	4.85682	12.297	6.24646	6.26632	6.26921	6.02569	6.46071	8.52901	8.85535	6.27247	8.09256	4.46435	9.86885	17.0057	5.47273	6.91399	7.93499	4.95003	8.5078	9.18461	6.47999	5.06018	10.5727	22.7014	8.11306	9.88602	12.9421
Ktn1	8.24647	14.0888	12.7124	21.5664	9.2168	8.3573	7.50073	8.33004	10.4257	9.33726	7.16317	9.55082	11.177	12.1364	8.11523	10.3651	5.67402	8.05719	6.18022	8.51399	12.1995	14.3734	24.7172	7.92622	11.6699	14.1101	4.7607	5.10582	8.18493	7.68751
Ctsb	6.02385	22.4002	12.1532	14.2321	9.98885	7.41072	8.2728	7.04458	8.32828	6.27612	7.19742	8.33137	5.59566	8.92569	6.60936	8.30529	6.15093	4.27035	6.55584	6.50941	7.24074	10.5987	24.0081	7.22685	5.83497	7.93391	8.82946	6.43853	6.02776	6.29727
Ak3	5.37984	7.12357	14.0158	12.7732	12.1856	7.99284	17.3401	8.92687	5.4103	8.51173	5.29638	9.95096	10.8958	10.6894	19.8039	8.5205	7.14959	10.9369	8.49944	6.89103	8.56601	8.7029	7.5772	10.5467	11.1841	11.0045	5.91669	11.9727	4.58964	4.24848
Zfr	10.0293	6.07521	4.81944	6.86867	20.4911	8.28644	8.7531	5.31531	10.4924	8.28099	6.9919	8.59336	9.41824	9.29597	10.1198	8.23063	5.21749	18.6689	8.18497	8.28151	10.0142	9.06764	10.2204	5.40934	9.6301	11.5541	11.6469	11.2198	4.94301	9.44361
Asb8	5.82358	5.34739	4.6545	10.3066	7.51352	8.05865	6.40996	5.91724	6.27185	7.17344	6.97049	6.1735	6.78724	4.48721	6.78852	8.35361	20.0506	10.4705	8.23739	5.98743	10.769	12.5327	14.8836	10.2575	11.8363	11.6631	24.2758	8.41595	9.73399	10.1433
Adk	8.29359	4.51399	3.34304	8.89143	4.36962	6.88933	6.49076	10.2889	8.88726	7.61953	19.6741	5.93056	5.22388	4.42874	9.40805	10.1895	7.16997	4.49714	8.12819	4.7724	4.12941	4.83494	3.99275	22.8418	4.8632	3.94733	8.13752	10.4496	7.05909	7.20276
Eci1	6.53434	21.0238	8.97913	5.82818	6.79321	9.20265	5.40448	8.99828	10.0001	6.42994	8.91435	4.88259	7.20191	10.2753	10.0375	4.2866	20.4827	5.55403	8.32911	5.36017	9.21987	4.06305	4.42254	10.0718	7.74348	3.82956	3.60056	4.65149	7.12484	8.51983
Tspyl1	8.07761	12.8066	8.46017	12.2275	12.0224	5.7757	7.63989	4.70319	6.73339	7.92719	5.89152	5.71144	8.30769	9.59804	6.51736	5.62177	6.14685	9.25956	5.52508	7.26826	12.6866	10.1703	25.2545	6.8124	13.631	5.53934	3.91131	5.49525	15.8028	6.99696
Pum2	4.92039	4.15573	3.85394	4.43116	6.86087	9.45575	6.5536	9.87057	10.1232	7.34777	5.57896	4.64441	5.73388	4.73569	6.58515	8.37117	15.0125	7.90315	5.55128	4.78556	3.91439	13.2961	25.2545	7.43407	8.02363	7.6504	6.71221	4.49572	5.56756	8.83538
Hnrnpdl	12.3383	9.9368	22.8501	6.35206	11.8274	11.6324	8.98203	5.7183	11.5181	10.5063	9.59941	8.88393	8.86535	10.4653	10.3522	10.4793	16.2353	5.47273	8.83139	6.72434	10.3345	10.3485	11.7505	8.5263	11.3066	13.9661	11.129	9.82654	8.61637	6.89635
Plbd1	7.84593	6.63711	10.194	18.3649	3.17574	5.47198	15.2708	5.37142	5.46159	6.27612	6.34966	5.45421	7.36396	6.1486	6.83209	6.83836	4.0354	6.09745	6.41171	6.641	6.55177	4.3981	4.39245	6.34616	5.43225	3.73796	11.4605	3.71254	10.753	6.75916
LOC100910717	19.7051	6.34673	9.01936	9.77184	9.8615	8.21051	5.22044	7.39145	9.70778	8.13742	6.19552	10.0319	10.4382	13.0183	11.4175	9.27593	7.68356	20.727	10.3775	9.68516	7.36361	8.64776	10.2978	9.70919	12.8212	9.56081	8.01737	8.70153	9.12176	6.00916
Ccz1b	14.5845	4.62335	14.3779	14.4176	12.5199	11.6476	6.29774	7.89645	10.2052	10.0397	5.53186	19.9781	8.56984	8.06333	8.66238	9.82493	9.54637	5.8022	8.70909	8.73331	14.0602	9.40269	13.1258	9.53219	11.775	9.50847	11.2947	12.0203	7.57271	11.7028
Mrpl3	10.9364	6.53151	8.59293	9.90645	9.82966	6.68685	7.39749	7.73322	8.50777	8.53737	5.21074	10.8608	6.53462	7.18148	11.1657	9.55702	20.2381	17.8602	8.29416	6.54011	3.88367	11.2688	10.4224	4.54592	4.94199	6.44221	3.86159	7.88374	7.47409	8.65245
LOC100909840	21.59	11.2341	9.83601	8.18201	11.2782	10.6099	9.10771	8.50348	8.52828	11.8549	9.37249	10.9703	11.3534	10.7235	4.95339	21.9381	7.7121	7.55656	9.70492	9.05352	11.2561	11.0016	6.49413	8.88894	11.6699	8.38752	6.81165	11.5876	10.3544	11.0671
RGD1561590	11.117	8.52642	24.061	11.831	8.89047	8.01815	9.21993	8.95237	8.31802	6.04538	10.3958	6.526	9.19899	24.6139	7.12262	7.6992	8.97571	5.67384	6.76112	8.04903	8.95218	8.77924	12.6487	9.1566	7.55525	11.3753	13.1758	8.87894	5.35801	6.80946
Fam96a	9.32636	19.274	3.91831	9.38984	10.1759	5.75545	6.85884	7.56488	5.85646	8.70657	6.6879	10.2892	7.73573	9.09135	6.78852	8.44145	6.9254	4.68541	8.47324	6.89541	4.08992	5.42871	7.33222	21.3956	3.782	8.85422	5.51479	12.5698	5.03751	8.55184
Mapk12	9.69942	11.3811	7.40617	11.6636	13.4073	5.4163	6.02393	7.23842	5.49236	6.32739	6.88486	7.05475	9.22283	8.48721	7.18556	20.0012	8.35205	6.91472	5.68668	7.07087	9.91323	5.44991	9.12444	10.033	10.4881	9.65677	13.0764	12.2929	16.2178	6.79574
Plin4	10.7126	9.90663	8.59293	17.8374	9.01782	8.95461	8.24587	10.748	13.9078	11.2345	16.5528	8.69816	9.9759	9.70523	8.50259	9.78979	8.37243	11.6386	9.74422	9.14125	14.9028	7.16335	10.6932	6.01806	12.3703	6.95253	11.3486	11.2458	9.75864	10.7287
Ranbp9	7.19406	5.53972	8.41994	7.18518	9.69038	8.2915	17.4074	7.28433	10.0206	10.7832	5.33919	12.9805	10.872	10.6602	12.2503	4.01869	4.98922	11.6044	4.8874	7.84726	9.15843	22.5164	12.5499	9.22999	9.1092	8.38752	9.52554	5.95391	6.63588	5.88568
Jun	12.2676	11.8865	14.5911	10.9324	4.59248	5.19864	6.25734	6.71301	8.38982	9.15267	16.42	10.051	8.43162	8.75517	8.87543	7.37858	7.40638	10.3207	7.70453	9.05791	10.0537	5.1912	5.34229	4.41209	9.79644	11.8507	11.821	8.11306	9.89424	22.8705
Tufm	5.79609	4.34052	7.72398	7.84731	5.26902	6.59574	16.7341	6.82523	8.77956	7.64517	4.80399	7.33103	9.84721	7.95615	20.9563	4.69506	5.0096	6.90616	4.752	8.13676	7.54792	8.71562	4.43973	8.39247	9.4769	6.4771	3.42654	4.73803	4.73346	7.62349
Ppp2cb	4.87327	7.35738	11.8917	9.51354	12.1776	9.65317	8.56008	7.87605	9.67701	9.99872	9.4153	9.68896	10.2714	6.08039	8.96259	8.66105	7.13736	10.3806	10.3775	8.71577	9.11455	25.3241	12.8593	8.10754	7.9711	12.1735	5.65566	20.1853	7.37959	9.4802
Masp1	10.4769	11.7054	7.24928	6.93051	9.93711	6.39832	7.09674	7.12109	7.21545	8.13742	4.11036	10.2653	9.0703	7.28867	7.7085	6.47382	16.4595	8.35671	8.82702	7.1235	10.668	7.30331	8.69895	8.12481	7.52899	12.9804	11.3569	12.5006	16.8424	10.8293
Hnrnph1	6.07097	8.96386	5.88551	10.0702	8.91037	6.82859	7.57704	6.09578	7.88725	7.56826	8.91435	6.44026	5.04753	6.75761	8.27986	6.38598	5.66586	9.77303	10.3295	4.39078	6.85895	7.51961	8.90525	20.9337	23.3968	5.31253	4.69855	4.3486	9.70934	8.68447
App	10.2885	3.28084	24.7409	10.4267	14.8758	5.82632	8.16058	10.498	9.92829	23.1047	6.2469	5.83053	7.17807	7.85383	8.67691	7.02283	5.45798	5.84927	6.30688	6.64539	4.95442	8.11337	7.99839	7.75353	6.97745	4.31371	6.63349	3.98946	4.86494	4.43141
Lamtor5	10.0764	7.40263	6.11079	3.63806	7.60505	10.6352	7.07879	6.47326	9.62573	10.1628	8.73024	7.3215	9.39441	9.90012	7.83924	8.61713	13.9894	2.61014	5.60369	3.35121	8.2325	7.05732	12.0986	4.08831	9.7264	10.6338	4.09362	7.927	12.828	7.86129
Sync	11.278	11.2341	9.7998	8.8696	13.284	4.49502	21.1556	6.75892	7.03596	7.04012	7.7369	6.94995	9.38488	8.86723	7.45672	8.44584	6.15093	10.2052	9.50837	8.66313	7.7059	5.28875	7.62877	22.7814	9.09607	13.7175	13.3084	13.7381	5.46484	7.89331
Thoc7	10.5633	6.32411	7.05618	12.4058	5.03422	6.92983	7.97205	5.56016	7.65648	5.69158	6.95765	9.03636	7.76433	6.1486	4.98728	8.92457	8.02188	21.5914	9.60883	6.87787	6.7668	9.65716	8.90525	6.72606	10.5537	4.01275	12.8071	11.1376	16.5301	10.7012
Syngr2	4.98322	4.0426	4.92001	7.42529	5.05412	6.65142	6.32468	8.72283	8.73341	5.92232	9.49665	6.27353	6.40117	5.80268	5.04055	20.0012	4.23921	5.86639	5.70415	10.9177	3.93194	11.1119	7.07864	6.76923	7.85291	6.61232	5.68052	5.30486	21.3334	5.60214
mrpl24	5.10103	20.9182	8.63316	5.26064	14.5535	5.24926	6.3157	6.16719	6.85647	7.74772	8.69171	4.57296	9.86151	7.53714	5.42307	5.7711	5.10743	7.98873	7.37259	16.0367	6.51227	5.93341	5.34659	3.96311	4.46049	10.8039	7.61961	4.22745	6.36469	5.95428
Cops8	11.3762	10.7212	5.6723	7.91279	7.91944	20.9059	6.05086	6.08557	6.3539	7.19908	9.90341	9.83663	7.14948	6.50913	7.87797	5.11669	20.2952	5.72518	4.81752	8.25081	6.35868	3.80858	4.52569	4.66248	7.18318	4.50562	3.04121	3.84235	6.37291	5.04422
Wnk1	5.94924	5.79615	8.03777	7.85458	6.10872	8.95461	4.85236	5.78971	6.30262	8.11178	8.97001	6.23542	6.08182	9.93909	4.5854	4.22512	8.8738	8.51075	4.53799	10.0887	8.17545	22.8727	11.3551	7.719	8.2031	6.60795	5.66809	6.84526	21.3334	8.11739
Ptpn3	4.94003	5.46807	8.23087	3.95094	7.25485	7.64863	7.55909	4.01454	8.11802	7.38367	6.13557	7.63589	6.792	5.71498	4.87108	10.9976	5.16857	12.5586	9.11965	7.81656	9.29886	11.5615	13.8607	5.72881	24.154	3.84264	4.59082	4.32264	16.5301	7.4177
Hikeshi	13.1276	6.28262	9.55038	4.86773	12.3726	9.77971	7.44687	17.3079	10.6924	11.378	19.597	9.76994	6.63471	8.07795	9.36447	10.6023	5.05444	8.94292	9.89272	6.82084	13.7969	12.1679	12.1373	4.97763	9.87085	5.65274	9.10292	11.2718	7.2481	9.88721
Sirt2	14.769	10.2309	12.7526	4.50392	7.9871	5.85163	6.73315	6.01416	6.01544	6.27612	17.8373	7.82643	6.06276	5.2911	8.58007	4.43154	6.26914	4.48858	7.77441	8.21133	9.8123	11.0525	12.6487	4.37324	8.86845	11.8681	3.7	4.89813	20.1542	6.86891
Srp68	7.23726	9.19767	9.52222	6.69768	6.96434	8.76226	8.67679	6.6773	9.42572	5.99923	4.03758	8.03127	8.56984	7.78562	9.24342	8.05934	4.52861	8.93437	10.1329	9.2202	12.0503	10.0474	17.6945	7.20526	9.97153	6.14561	21.3216	6.33901	8.00825	8.35062
Mtmr2	8.0619	12.339	11.4733	20.606	11.9389	10.7617	11.002	8.97278	5.7539	11.2242	9.90769	7.39772	20.3522	10.7673	9.65984	9.74148	7.3004	5.70807	5.92253	10.172	8.66255	8.42722	5.95259	8.64286	8.36943	13.7175	13.3747	13.0198	9.81617	9.76831
Luc7l3	10.4652	6.0375	11.2923	4.15103	6.56239	5.882	6.41894	6.92215	6.3898	6.96321	4.12321	8.42187	8.6032	8.90621	8.34281	7.63332	12.7135	21.6684	4.8743	7.027	9.29886	11.9177	14.8836	5.55612	13.4077	10.9609	10.752	6.2568	6.35647	5.78964
Deptor	8.56847	21.0238	14.1606	9.22249	12.7069	5.82632	5.36408	6.27942	5.97441	6.84015	7.41578	8.73626	6.69191	5.03776	6.91925	6.72417	15.6565	5.67812	5.87886	7.08403	5.50735	6.0564	5.91821	7.38658	4.46049	14.4503	13.2918	5.99718	5.83464	5.6433
Scoc	10.795	7.66284	12.5837	5.03508	9.91721	6.55524	6.22592	7.1415	7.75391	6.20433	6.94908	10.9132	7.08275	12.5164	11.9114	9.14417	6.84387	6.41837	20.5542	10.5668	10.1195	11.0228	4.82654	4.93014	9.91463	9.32965	9.52969	6.79334	9.36008	19.2074
Psmb3	15.3463	8.11914	13.6578	13.3808	24.2836	6.01361	6.73315	6.97826	7.14878	8.28612	5.85299	7.15478	6.17715	9.92935	7.2243	6.02584	5.14819	7.54372	5.73472	10.0712	14.0295	9.27546	7.21617	5.58634	7.07375	9.00252	3.52598	8.64961	4.79509	3.05946
Mia3	9.37349	11.9128	13.0423	5.70449	13.5466	12.8321	10.3197	9.0595	9.8206	14.0238	8.11797	11.4372	11.3486	11.3423	7.76661	9.85567	7.55313	11.6044	9.4909	9.49216	12.9017	9.65716	23.0797	7.32614	8.74151	11.7198	13.2753	13.2405	15.9261	11.3461
Clpx	13.0255	7.25933	12.9819	18.6305	12.8979	12.2601	8.74861	5.27961	8.32315	9.74234	7.75403	8.56954	10.1999	10.9184	9.88257	8.8499	9.50561	9.55053	20.3926	8.04465	6.20509	8.88951	9.19751	10.3093	12.0902	10.8519	8.33226	8.38999	9.43404	8.65703
Mcl1	4.82222	5.01554	7.49467	5.32976	3.38666	7.23355	5.08129	6.54977	5.43595	6.90681	7.42006	4.45864	21.1482	4.73569	4.62413	4.10653	8.35613	5.2759	6.46412	18.9405	5.84086	6.1285	4.86092	5.39207	4.90697	8.33082	8.00079	6.27843	4.81974	4.69208
Hnrnpu	7.22155	12.8556	10.6124	3.27426	3.5538	6.77797	7.52767	10.3552	25.0361	9.7167	5.09942	6.969	10.5383	12.8331	12.5263	11.5905	7.32486	17.8602	8.91874	4.53992	8.46508	10.2467	10.3107	6.76492	6.33836	7.85976	11.1124	6.89286	5.76068	6.26068
Gpbp1	12.9902	11.4	13.1428	18.8706	13.5466	11.025	11.2533	7.13129	11.8514	10.0551	7.56564	9.8414	9.67086	10.1778	8.91901	10.2685	9.79094	8.37811	9.54768	8.94386	11.2034	8.20244	24.7129	10.0589	7.5465	11.6631	7.44973	6.79334	9.47102	8.4238
Kcnj11	12.6446	13.7833	8.69752	12.5222	15.3693	11.6121	6.45934	10.748	9.6565	11.8139	9.66364	9.58893	11.7156	9.15956	8.64785	10.9537	7.32486	9.51202	21.55	10.523	9.89567	9.8565	5.3208	5.9792	12.3703	14.1101	12.4549	8.11306	22.0114	12.3201
Slirp	6.76996	9.54461	6.33608	21.5846	6.43505	7.51195	5.65585	7.71282	5.44107	8.25022	21.1042	10.8608	5.59089	8.01461	10.667	5.04642	6.41995	8.63912	6.84847	6.28132	6.48594	10.0304	5.18756	6.37638	8.46136	9.25986	7.34614	4.28803	6.7386	6.5991
Fis1	5.64687	6.63711	4.96024	1.9973	8.22588	5.54791	6.65685	5.99376	6.65134	5.37367	5.18077	5.96391	9.1275	4.7503	5.59254	19.1448	5.64548	2.88399	7.06249	5.84706	7.79367	8.36784	11.9739	7.67583	4.00525	5.5786	7.03539	7.45537	14.7017	7.33081
Ube2l3	9.82508	6.5202	10.4877	5.14786	14.9037	8.5446	8.90123	9.50839	8.77956	7.84515	9.32967	5.96391	7.14948	11.274	9.65015	10.005	21.0656	9.54625	5.6299	11.3037	10.1239	9.1567	19.9251	7.28729	11.1096	12.3174	7.13069	7.19142	7.39602	7.86587
Timp2	23.3532	13.0253	12.6158	9.34983	8.97006	9.93157	8.86981	9.5543	9.53342	7.80413	6.27687	8.26468	7.33536	11.0548	10.7251	9.78101	10.1333	8.24546	8.98425	10.4572	10.0229	14.5006	26.1398	9.55377	12.0945	7.00487	9.30595	11.1203	6.3236	10.6098
Synj2bp	14.5845	9.42394	11.5457	5.47893	9.18894	3.28015	7.13265	8.56469	7.93853	8.01436	6.57658	6.95471	9.0846	9.69061	6.21716	11.6344	7.48383	6.21298	9.45596	8.51399	9.04434	9.8777	20.6385	8.01256	9.48565	12.1735	14.1454	12.2799	9.33954	18.6997
Fmc1	7.37863	7.6553	5.39472	13.9884	4.8034	5.61878	8.82492	6.2233	8.96931	9.81412	7.77972	11.4753	5.8578	10.0658	9.04006	5.03325	7.11698	16.3412	5.82644	4.06619	12.4672	11.3324	10.2161	4.0624	13.631	9.65677	4.19306	6.33901	5.76479	7.63264
Jak1	6.55791	6.42592	10.8377	7.39255	9.8416	27.7244	10.5666	5.2388	8.48725	7.39905	5.93006	8.0265	12.5259	7.3179	25.7257	8.8543	6.87648	7.00886	9.32493	9.2202	5.83208	4.76284	5.23914	7.25275	9.49441	7.86412	6.8448	9.19048	5.2635	7.89331
Mocs2	9.1418	6.68236	10.9262	5.91913	4.21442	7.92197	6.58054	8.36065	8.29751	7.17344	6.04138	21.5548	6.96359	8.49695	6.56578	4.37884	7.93221	8.17272	8.04958	5.97866	8.65817	4.70347	7.86086	7.53768	4.46487	8.28284	23.7123	7.87508	4.77455	6.54879
LOC100912618	11.7807	11.9581	8.00558	10.5104	10.6893	9.28364	10.4005	6.08047	26.0105	12.8035	5.77164	12.5756	12.3066	7.03045	10.7202	9.7327	5.6944	18.3009	10.561	10.0054	5.02024	11.9177	12.249	7.04985	12.1646	10.058	4.15163	11.1766	5.65385	10.2073
Retsat	6.93096	7.4856	20.3157	9.82641	9.72619	10.3315	8.49275	6.85073	10.8668	6.86066	5.45051	4.86354	5.07613	8.5408	8.21691	8.48097	7.82215	5.18604	9.25505	6.24623	21.9504	9.63596	10.1946	6.14757	9.97591	4.79349	7.88478	5.21832	7.49053	8.5427
Klhl40	13.0962	14.975	11.236	7.3598	10.5937	6.68685	8.18303	7.1466	7.35391	4.30201	7.02615	6.36404	7.48312	8.19975	9.82447	4.5633	5.96342	6.20442	19.471	5.3514	8.86003	8.71562	8.04137	7.85283	7.62529	8.31337	4.44581	9.99097	4.76633	10.2714
Dennd1b	9.7701	10.016	10.7814	9.70272	10.2435	10.129	10.4184	8.5902	11.636	7.63492	7.784	8.57907	5.43837	9.72472	23.0383	10.2641	8.44173	10.5946	9.53021	10.3563	11.493	8.15154	10.4654	9.11774	8.60143	8.3439	8.6513	23.5041	9.99696	9.86892
Cul5	14.4902	9.29195	13.2313	19.973	12.0264	13.7078	10.3242	6.14169	12.4616	10.1628	9.93338	12.5614	11.6679	12.8088	11.8726	9.00362	8.09933	10.0768	9.4778	10.637	4.48048	7.25242	8.14452	18.5247	8.87283	8.21742	14.1081	13.3444	6.6934	8.16312
Zc3h11a	10.6419	5.25312	7.90099	21.1044	13.1009	8.7167	8.97754	9.085	8.47187	7.66568	6.36678	19.8781	5.9293	10.7089	10.0327	6.15321	8.40912	9.19966	4.56856	7.29457	12.397	5.77224	11.398	10.2488	11.5649	6.81295	6.86137	6.85392	5.46484	6.56251
Napa	7.03306	11.679	15.2106	4.62034	9.177	6.36289	17.9281	8.6055	5.89749	6.66068	5.84442	7.231	8.2362	9.11083	4.20772	4.52377	7.13328	6.57241	4.42443	10.4966	8.23689	9.21184	10.9596	20.5797	4.17159	10.7472	5.07559	4.43082	6.33593	5.27288
Mrps14	7.33936	12.3201	12.7808	21.279	9.98885	9.46081	8.6723	9.11561	7.16929	11.8139	15.6494	8.4314	9.34675	9.81729	7.9845	4.616	5.5232	8.16844	6.70871	8.65874	9.31203	8.46539	8.83218	5.76766	6.47406	5.3736	7.56574	4.85053	4.85261	5.14483
Hypk	5.07354	3.19034	3.35108	7.27613	6.90464	5.43149	9.25135	6.72831	9.73342	9.74234	7.44575	6.89279	5.0237	8.80876	4.96307	6.72856	6.06125	16.4952	8.5868	7.7376	2.77781	6.53566	6.71762	4.792	8.53577	10.7908	4.14334	6.46016	13.0006	5.84452
Psma5	4.31958	9.08454	5.61195	9.2516	7.94332	5.67446	6.92617	8.08519	5.83082	7.12216	7.63843	7.95029	5.24295	5.7978	5.50538	6.4299	19.3495	6.26005	10.5173	10.9441	23.7233	12.4479	8.72903	7.28729	8.39132	13.1505	6.24402	8.80105	7.35494	10.8064
Aldh6a1	4.67693	3.26576	5.77689	20.9189	4.97453	6.98045	7.73864	9.67163	5.31287	8.0964	8.38343	8.60765	8.60797	5.80755	10.7444	4.47107	7.05991	5.55403	4.76947	7.68935	5.07729	5.17424	7.12592	22.8418	6.05383	5.36923	7.85163	4.0111	8.20548	6.37044
Sh3glb1	3.58132	5.40773	4.67059	3.32519	5.05014	5.31506	19.7641	5.51425	5.99492	6.53762	6.70503	6.76894	6.83967	5.40804	7.35503	4.87074	6.16316	3.22202	4.66028	6.76821	4.07675	6.18364	4.12598	20.9121	4.98139	5.22966	6.63763	4.80726	6.42632	4.98476
Cdk2ap1	14.4431	10.9173	4.01888	7.98555	11.8274	6.11991	17.3401	6.35083	7.7693	5.11216	7.14176	7.96934	3.16007	10.5725	9.34511	4.54573	6.63599	4.58699	7.86177	10.8563	10.4398	8.17699	5.62595	7.28729	4.2854	14.1537	5.89598	4.33995	15.0797	5.48324
Ppp2r5c	9.92325	6.0375	13.6578	10.8342	7.18321	7.92197	9.04487	8.95237	7.94879	7.87591	10.0447	11.118	20.743	10.4848	9.50973	9.78101	19.3495	10.5732	6.63446	8.8342	5.48541	10.5987	10.4353	5.50864	8.99539	11.9946	4.80213	10.6616	8.56706	8.94971
Nfib	21.4565	9.5333	13.4969	14.1412	15.4966	10.3062	6.19899	5.99376	10.3437	12.2907	8.97858	9.26978	18.0119	6.63093	8.09102	6.15321	9.49338	3.774	6.67377	9.11493	7.37677	9.99646	8.30784	9.10911	6.10636	14.3369	9.86115	12.1674	4.46638	5.47867
Coa3	11.0267	12.1165	9.21648	11.831	20.4911	6.63623	6.13615	7.44756	7.2616	6.74785	7.5742	6.92137	8.11227	9.89524	6.80788	4.22072	5.38868	19.9654	8.87506	6.63662	4.14697	6.7774	5.74629	6.60087	9.56444	5.56551	12.7615	9.06067	6.6441	6.04117
Slc37a4	7.48858	19.8057	8.255	9.85188	7.29066	7.84098	5.9566	6.23861	8.53341	6.9427	8.20788	10.3749	7.91209	10.6163	5.94116	9.89959	9.60343	21.0009	10.3339	8.56663	14.9028	8.24909	11.6645	8.77669	13.631	7.92082	6.67907	10.441	7.89731	8.46495
Ncl	20.4002	9.57855	5.96195	3.30336	8.90639	7.55245	8.00796	6.6824	8.54879	8.82964	6.98762	9.21738	8.63657	6.62119	8.98195	11.6344	8.16863	20.6928	10.2596	6.86032	11.9055	9.61475	4.98556	10.4474	9.87085	10.5989	6.28131	9.46741	7.57271	7.20276
Foxn3	3.85621	10.5326	6.50504	6.56671	3.89207	12.0475	11.0469	10.5286	10.6155	10.6089	5.56184	5.1684	8.52694	9.26674	9.22405	3.69807	16.4188	5.77225	5.34163	5.8339	4.98075	7.09973	3.64892	7.43407	5.25278	6.63849	4.15991	4.25774	6.25786	9.44819
Rabac1	8.27396	7.4328	7.97742	4.52575	9.34813	7.41072	5.5167	5.30511	6.76416	10.3371	8.5761	4.58725	5.86257	4.35079	9.45647	21.758	10.2067	5.29729	6.91399	8.84736	12.2522	11.7862	8.40669	8.94938	13.4077	9.58698	4.39609	6.47314	18.7202	7.98477
Eif3i	4.18214	19.8057	9.24866	9.16065	7.72444	7.28417	4.29575	7.23331	5.12312	6.88117	7.59133	6.8261	6.69668	7.8246	4.43529	4.49742	4.64682	6.69222	7.81809	22.0592	6.56493	8.26606	8.78061	6.0785	3.97461	6.11072	4.80628	4.81592	5.41964	7.52745
Slc25a46	7.12731	6.87091	8.22684	7.09423	6.70168	6.74254	20.7965	5.92234	7.6975	8.17331	3.83634	8.36471	9.59936	7.27892	7.15651	7.10188	7.28002	8.36099	6.31999	4.45219	14.9028	10.8871	12.3865	7.62834	24.154	6.26338	3.68343	7.30825	7.93429	5.90397
LOC100911590	12.0438	12.8556	13.6014	20.0712	7.9672	13.2522	12.0479	8.88606	11.3078	11.4703	9.4624	11.0751	10.953	9.86601	9.81962	9.65803	17.2096	6.39269	5.48577	10.909	11.7563	11.4681	11.4238	8.63423	7.61654	13.796	10.6608	12.7472	10.2764	11.0671
Mtus1	9.89184	8.03241	22.5001	8.93872	9.43568	6.70204	6.03291	6.52937	6.45647	7.88617	7.13748	6.48789	5.78631	5.61754	7.76661	8.61713	19.9324	4.53992	9.7879	7.70251	5.60828	8.24485	8.47546	5.83242	8.80279	13.7437	9.69956	6.0015	4.72935	6.02745
Mknk2	10.6851	7.53462	7.08434	5.74087	9.18894	7.33985	4.61894	6.31512	8.37443	10.0756	7.80969	9.27454	7.06368	4.10718	10.7202	20.0012	7.48383	9.77731	7.14111	7.50951	9.76402	6.46356	7.58579	3.71272	9.79644	11.9248	9.29766	4.24043	19.8172	9.86892
Tmem126b	13.1276	12.5351	12.1089	19.0089	13.3039	9.9417	8.32667	9.5645	6.4257	9.09627	18.4838	8.05508	7.24004	5.28136	8.74469	9.29789	9.88877	10.1453	9.09781	5.90409	4.58141	8.28302	8.83648	10.0243	11.0002	9.44741	6.89038	10.3068	5.17722	5.44666
Ndufaf4	6.60503	13.7833	10.7854	7.89824	11.8036	6.35276	7.24039	7.6618	6.93852	5.69158	8.20788	8.86488	7.35919	6.67478	6.92894	8.84551	6.01234	5.87922	5.81771	6.77698	9.43929	11.396	18.9881	5.04671	8.28627	13.639	11.2326	22.4483	9.28612	4.76983
Psmc1	6.20056	6.47872	11.5337	5.5626	3.64931	8.05358	7.46482	6.10598	8.93341	7.18882	7.1546	8.87917	7.64994	9.24725	9.07395	9.36377	6.52186	11.1637	4.69959	4.83381	6.45961	9.82681	8.37661	22.7814	11.0133	9.83996	22.0177	9.39385	5.40732	7.9619
Cep19	5.81572	4.5253	3.60855	6.93051	3.63339	6.36289	7.86432	7.68221	6.03082	5.54288	5.02663	8.5886	6.48219	6.28014	9.73731	20.2428	6.6686	7.03453	5.53381	6.1892	5.14312	5.52201	4.96837	3.99333	4.2066	6.42476	6.73293	4.72505	18.2764	6.73629
Oxr1	7.6378	10.8305	7.68375	20.1476	10.1799	11.5008	10.0818	6.50386	11.9232	12.9778	8.04946	9.37457	23.3883	11.7466	10.8946	10.0841	4.94438	5.42994	8.33784	8.36485	10.1107	9.38573	10.0786	8.3493	10.7376	8.52273	10.2133	10.5751	8.96973	10.907
Pole4	5.08532	13.0253	5.71253	11.6673	12.6632	5.70483	9.17056	7.95767	6.13852	6.45045	17.3192	6.38309	6.85873	8.02436	10.943	7.98468	11.1075	5.37859	5.23681	9.10616	8.645	2.4514	7.80928	6.96782	4.68373	8.73209	4.21792	5.0063	5.16078	5.77592
Gmpr	4.70834	6.73892	9.15614	9.49899	5.75851	3.72054	5.55261	8.5749	7.16929	5.44545	18.3982	9.1364	10.219	10.5822	5.32138	4.62918	7.41046	4.77099	5.13199	4.47851	7.83755	7.39662	4.4999	7.13619	8.46574	12.3915	5.65152	11.9727	17.8326	6.66312
Pcnp	12.1184	12.7953	12.0647	9.5572	9.90528	7.67394	6.44138	6.16719	5.91287	7.02474	8.23785	6.05441	6.99695	10.3094	11.3788	8.48976	8.94717	17.9415	8.31164	5.89093	7.52159	7.54082	7.34081	10.02	6.97307	11.8507	12.8651	23.9627	6.54137	9.85063
Ap3d1	12.2676	4.37446	7.89697	11.3398	10.8285	11.5008	23.0409	7.68221	7.79494	7.34265	5.66031	9.32217	7.66424	11.3569	11.4175	10.2422	8.05449	21.095	9.09344	9.27722	9.73769	13.2961	14.557	9.3336	8.65834	12.2302	8.12509	9.42414	7.70419	6.47562
Snrpf	5.8275	5.79615	9.12395	20.9189	11.1111	8.06877	7.00248	6.10598	7.71289	6.47609	6.18695	11.3514	7.2448	12.5895	12.1535	4.37444	7.1129	20.9324	7.40753	10.3519	10.3521	10.8956	7.10443	7.03689	9.56444	6.62104	5.78825	4.85486	5.77712	5.01678
Capn3	10.3788	7.40263	7.50272	8.36755	9.42772	8.15482	20.5047	5.89684	4.75389	7.799	6.30684	8.35995	7.16378	6.66991	7.78597	5.27041	7.31263	15.6865	6.35493	8.17185	7.1793	9.68685	9.24478	6.91601	9.13547	9.93592	8.556	3.98946	3.34876	4.44056
Palmd	13.108	3.8465	13.5572	6.68312	13.674	8.73695	5.42243	6.59568	5.30261	7.61441	5.49333	8.30278	7.66424	8.19975	8.07165	4.59404	9.71757	8.28825	7.97533	7.82971	6.30164	10.5775	5.77638	21.7108	10.3217	10.6861	8.32397	23.9195	9.60661	11.4467
Camk2b	8.2072	4.19721	12.4227	4.88592	8.15424	5.85669	5.62443	8.99318	8.17443	6.49147	5.06945	5.67333	7.60704	6.52375	5.43275	22.0567	8.97163	4.47574	9.43412	6.68048	8.5309	12.0916	10.2118	5.05102	13.1582	12.0208	10.3998	4.16254	14.1593	7.6052
Habp4	5.59189	11.8789	9.46188	7.3598	10.8803	8.81288	8.82043	6.73341	6.83596	7.04525	10.2716	9.37457	6.39163	5.96833	6.44473	5.7755	5.49874	6.33707	8.30727	10.773	11.8046	11.396	19.9251	5.91013	11.6743	10.8388	6.89866	9.30731	16.2178	8.29117
Mxi1	7.48073	9.15996	9.62279	12.0202	5.11779	11.5261	9.24686	7.90155	8.12828	9.85514	9.4624	11.2085	9.23712	9.97807	8.4687	8.56442	9.59121	8.42945	21.1001	10.773	9.18038	8.89375	8.75912	10.1538	5.34033	8.8106	10.9343	8.15201	20.7623	10.9299
Dek	4.03292	5.26066	9.52624	6.47212	10.4704	5.47198	20.2533	8.81975	6.0821	6.33252	6.01569	5.2732	4.89501	6.89403	8.18786	5.52515	4.78949	19.9825	9.42102	5.56633	8.22811	5.08517	7.9855	8.73352	9.49441	5.50009	3.94032	11.778	4.90192	9.43904
Optn	20.8911	8.76022	12.0687	8.86596	10.2157	6.65142	8.13365	7.90666	8.4052	6.80938	9.4624	8.26468	9.22283	9.14981	10.3522	22.4476	6.78273	9.33658	6.831	9.00965	10.2424	12.5327	12.0384	9.5106	10.3524	6.67774	7.95522	11.5357	8.99439	5.78964
Lmo4	11.0031	11.1813	13.5572	10.6814	12.8144	6.78303	9.39499	11.0285	10.6052	6.97859	6.91911	10.1272	10.8052	13.3349	9.87773	9.6756	6.13462	10.7058	6.29815	10.0624	13.4327	12.0068	12.6487	5.53022	21.8647	8.57071	6.96081	22.4483	8.59993	7.50001
Cdadc1	11.3526	12.5351	9.22855	12.4968	20.7696	10.8174	9.79001	9.23293	7.95392	8.15793	9.65507	8.25515	7.72144	10.7673	11.0156	8.82794	9.47707	5.20743	9.67434	10.1106	4.08992	6.91736	11.5828	21.9396	9.81395	13.7437	13.2753	13.3444	5.24296	7.843
Lims1	11.2113	11.6526	5.21771	7.56354	15.3693	5.74533	7.72517	9.45738	7.77443	6.04025	3.84062	4.60631	5.76724	9.38367	7.02578	4.9498	7.6428	5.45989	16.4835	6.76382	4.90615	10.3103	10.3837	16.6166	11.5868	11.9467	7.61961	5.45631	5.2142	6.33843
Dpt	13.587	22.4002	11.8796	9.63359	13.3039	13.9052	9.45784	11.2019	11.8668	9.09114	8.31492	9.66038	9.11797	10.6212	9.44679	11.2787	7.93628	8.45513	8.98425	9.52725	9.72014	12.1807	22.405	7.1146	8.02363	10.6033	8.48556	13.6602	9.03548	10.468
Fndc5	8.21505	7.37624	7.3418	7.33798	7.65281	10.9845	5.72767	10.5286	8.57443	8.38354	8.06231	6.85944	8.77479	6.45554	4.94855	20.537	5.86152	7.74911	5.98368	8.1894	10.4003	8.18547	12.1373	5.35322	3.80827	4.47945	3.5757	8.16066	16.0329	6.3933
Tmed7	3.76196	8.12668	7.23721	6.31568	9.66252	6.92477	9.17056	6.81503	8.32315	6.86066	7.9253	8.48856	4.37071	12.0536	9.06911	6.44308	11.0301	5.55831	6.04919	6.97437	10.453	5.05124	20.5826	7.74922	9.83146	7.39742	6.60034	7.32123	5.31692	5.64788
LOC102548286	15.1421	11.6677	10.1739	10.594	24.8289	9.99232	6.57605	5.88153	10.7745	6.31201	9.2055	10.0462	9.33722	11.7077	9.85836	10.2685	6.35066	5.06623	10.2509	7.08841	10.3521	5.82314	5.70761	22.7814	8.30377	9.14645	7.63618	4.69909	9.57785	11.7394
Hnrnpab	11.0346	21.5706	11.6302	6.05374	7.79608	10.5846	7.20896	5.19799	6.37442	25.5403	6.1998	9.8414	4.81875	7.89768	7.40345	5.92043	6.37104	6.33707	7.25466	6.58836	5.05974	7.9098	7.99409	9.00118	4.16283	7.28401	3.56742	3.7861	4.97999	5.11739
Rc3h2	6.09453	9.29195	5.80505	5.95915	6.59821	6.93995	4.53815	6.23351	7.10263	6.42994	5.245	9.71755	10.0283	10.7479	8.91416	9.16613	13.2801	10.3678	4.90924	9.47023	12.4672	10.1703	25.2545	6.57065	14.3445	6.5338	6.83651	11.6828	8.56295	6.24696
Vldlr	10.9953	22.4606	14.7158	9.02968	13.674	9.83033	5.39999	7.71282	6.40006	7.18369	21.1042	5.53519	9.76142	11.7905	7.03546	4.99372	7.23519	4.83517	5.7653	10.0229	7.53914	7.46447	5.47982	8.16798	5.86123	4.8153	13.1758	7.48133	5.87984	4.5869
LOC100363716	3.71091	17.8938	8.52052	9.09516	11.7677	6.64636	5.25635	7.37614	6.45647	5.7326	4.6156	6.87373	10.6241	5.71011	8.27986	9.64486	21.6281	4.33882	9.7748	5.09699	4.54631	9.17367	6.72621	6.50589	5.50667	3.88626	6.28131	4.45245	7.53162	6.03202
Dazap2	8.50564	19.6134	11.244	7.53079	12.0185	8.19026	8.26382	6.28962	5.37953	7.53749	8.69599	9.58893	9.20853	7.53227	9.21921	6.83397	6.08978	4.57416	7.38569	7.93499	6.89845	7.46447	8.42388	21.9396	7.05186	5.73562	10.3625	7.26498	5.02519	7.07471
Larp1	6.40476	4.41971	3.69705	4.60215	5.18943	10.3467	6.42792	11.2887	10.6565	7.80925	6.99618	5.03979	4.50417	5.30085	5.37949	9.41647	7.05991	5.76797	9.0323	6.32518	8.35098	6.20484	23.0797	9.93799	9.22301	6.92636	6.93595	5.27025	14.1593	6.88263
Gpx3	7.38255	3.75223	7.60329	10.0629	6.22413	6.39326	15.7242	5.68259	6.36929	5.38905	6.79066	9.03636	9.46591	4.48234	10.3861	4.15484	5.23379	3.64991	6.44228	10.7072	8.56162	8.19396	4.68471	4.21782	7.21382	7.05721	6.57963	7.16113	19.7885	6.67227
Yeats4	11.6157	8.26621	3.27867	8.27296	11.4971	7.79036	8.34462	11.6916	10.7078	5.77875	6.49951	9.26501	5.36211	7.88794	7.77629	8.70497	9.82762	20.6928	6.75238	10.0536	10.0361	6.94281	10.7533	7.28729	9.34995	8.63614	10.002	9.74433	14.1593	9.85977
Sf3b1	4.12323	7.825	7.42629	4.23835	3.33094	5.32519	6.47281	6.11108	6.47698	6.20946	17.8373	6.62127	7.02079	5.71985	6.59484	3.85179	5.70663	5.43422	6.80043	6.92173	3.80907	4.44475	4.24632	4.75314	5.14773	10.0624	5.82968	21.6219	10.1613	6.47105
Tfdp1	14.5845	8.5415	9.36533	3.92911	13.2044	8.30668	10.4184	22.6232	7.63084	11.0704	9.21835	10.6702	8.66993	9.89524	10.7202	9.36377	20.5724	9.50346	10.9541	10.4966	9.72892	8.59687	5.08442	5.53886	8.03676	13.2377	11.3362	9.65779	6.95637	10.8064
Egln3	12.1066	16.4457	11.1475	13.8756	12.882	11.5767	8.36707	8.64121	11.4052	6.77349	7.72834	22.922	7.33536	8.89159	5.37949	9.39451	7.42676	6.17019	8.80081	9.64568	7.12225	10.1534	9.421	6.95487	8.22936	12.3741	6.57963	11.2458	10.9502	7.73782
Tmem59	8.77267	6.56545	9.39349	8.24385	7.11954	6.52487	7.93166	5.53466	8.0052	7.32726	20.5433	6.55934	4.67099	7.09866	4.81781	7.37419	5.69847	6.08461	4.76947	5.31631	5.31426	7.53233	7.34081	22.5181	7.17443	10.7908	3.75801	4.89813	6.48385	7.78355
Fdx1	6.71498	7.7458	12.5394	7.41801	6.90862	7.75999	17.4074	8.76874	8.11289	7.19395	8.23785	6.73083	6.90163	24.6139	5.21486	4.52816	6.97023	8.99427	4.84809	5.27683	14.9028	8.52053	12.5499	6.70879	11.8494	10.9522	6.62106	3.98514	5.85519	5.22714
Alas1	7.26475	11.7507	6.34412	11.7691	9.37997	8.10927	19.8763	7.10069	10.3386	8.42969	8.28067	9.81282	5.07136	9.61266	10.0327	6.53092	10.5246	10.402	8.45577	9.85184	10.3696	6.86647	9.51125	9.85597	22.5344	11.5672	3.8906	4.95438	7.71241	8.6616
Psmd14	10.7243	13.9869	9.35326	7.49441	12.3726	6.22622	8.34911	6.42225	6.37442	8.45532	19.9395	8.12654	7.44499	8.33617	4.95339	6.96134	6.71751	5.58826	9.93203	8.46574	10.5934	5.30571	4.87812	5.72017	8.74151	23.5924	10.6898	10.4669	5.16489	6.718
Suclg2	5.35628	8.14177	22.6811	6.36297	11.4931	6.03892	6.27979	7.72302	6.46672	6.95808	5.32207	8.76008	12.0016	10.2314	10.2845	9.0739	21.6281	7.14578	6.45102	5.29876	4.6999	7.75712	7.88665	10.6676	7.33201	3.84264	4.88914	11.5184	5.92915	9.61282
Clta	12.1184	11.8563	13.2313	19.0089	7.35832	10.1341	7.79699	6.75892	8.28212	10.1218	8.22073	9.65562	9.82338	11.2351	8.72048	9.04315	20.4827	9.50774	6.58205	8.95263	8.58356	9.36876	7.71043	6.38933	5.19588	13.6346	10.4495	12.1934	7.94662	9.26069
Itgb1bp2	13.803	13.7833	11.4733	14.1412	8.54027	13.7078	9.55659	7.07518	11.3078	10.1372	7.85251	10.6655	12.3591	13.3349	10.9769	8.91139	9.50968	5.68667	9.74422	19.6335	11.2034	10.7768	12.0384	10.3222	9.38935	13.7873	20.8824	10.2376	8.51365	8.89483
Calr	4.56305	3.94455	8.33949	17.1753	6.54648	7.25379	7.04288	5.99376	7.9693	10.6448	5.83158	9.7366	5.11426	10.5043	6.34305	5.64813	5.56804	10.248	5.94874	5.84268	9.77719	12.2782	5.10161	18.3693	8.63207	6.717	4.48724	8.19528	5.23474	6.08233
Tomm22	8.23469	5.87158	8.5527	10.8887	4.79544	6.49956	8.51968	9.14622	8.86674	7.89129	6.97906	8.89822	8.66993	5.68087	8.02807	8.46341	7.23926	20.5088	4.39385	9.04475	10.7733	11.7057	10.229	7.26138	8.2031	6.14561	22.7925	9.00875	5.77712	7.31251
Wipi1	4.27638	7.40263	9.87624	6.44665	7.24689	5.47705	6.32468	6.95276	8.23597	6.65043	5.5233	8.2361	4.43268	11.2594	8.78827	8.86308	8.24607	21.6898	9.09344	5.15401	6.74047	7.16759	8.08005	5.2971	11.2103	5.52189	5.36148	7.45104	18.675	9.16008
Arpc5l	12.3815	18.8856	11.3245	11.3726	7.80404	11.5058	11.6528	8.80955	10.2462	14.0238	6.59371	11.4562	10.9149	11.3423	7.76661	10.4793	9.42001	7.87748	10.8536	7.66742	12.691	14.3734	24.7172	10.2057	13.3902	10.9566	13.7393	7.43806	8.50132	8.95428
Aoc3	6.58932	4.18213	9.34521	7.971	7.00413	6.8944	7.04737	8.76364	5.18466	6.78374	8.66174	5.56853	6.40593	4.43849	9.63563	5.40657	16.9201	7.23564	10.3339	9.54918	6.05589	8.58839	4.23343	4.90856	9.78331	16.6573	5.5355	5.02794	8.26711	5.94056
Tmem230	7.31972	11.2378	7.61938	8.66223	6.08484	7.28417	8.14712	7.37614	8.08725	6.97346	5.83586	5.53995	9.86628	9.75395	8.15881	10.3695	6.13055	10.4363	9.67434	9.9615	9.73769	7.29483	9.39521	22.5181	10.186	6.85657	6.38075	5.81544	22.0114	11.0397
Syncrip	11.926	7.83254	14.3779	6.27202	10.343	10.0936	17.5825	8.14131	11.1283	7.13755	8.5761	11.6658	10.5622	11.6151	10.1731	9.46918	7.39823	8.63056	6.52527	9.05791	10.6066	11.4978	21.7302	5.74608	13.4427	8.24359	13.1758	9.92174	7.1536	8.86739
Tab2	13.214	8.77154	12.9819	8.74227	13.5785	9.69872	9.97853	10.2276	9.73855	14.0238	6.38391	10.4368	11.7156	9.05237	11.34	10.8878	7.78139	20.727	10.6745	9.79482	7.43382	9.86498	11.9439	5.46978	12.1646	12.9237	21.736	12.9809	6.46741	9.98782
Camk2d	8.04227	8.34163	11.4251	6.75225	7.83985	5.74027	16.3436	5.19799	7.40007	6.28637	7.95955	6.55934	5.05706	7.77101	5.06476	6.80762	4.86694	5.08763	8.46014	9.99221	9.15843	8.39753	7.34941	6.09145	6.52658	5.96679	4.61568	10.0213	19.9076	9.64026
Snrpb	5.43482	4.53661	5.02863	6.6613	9.51925	8.68633	9.21095	8.64631	7.85135	6.20433	7.74975	5.22556	9.52787	11.2838	6.92894	10.8175	3.28946	20.7784	9.51711	5.36017	7.33289	10.2467	12.6702	7.01099	8.41758	4.73243	7.71076	10.7698	15.5152	7.67379
Mfap5	15.1421	21.5706	14.7279	9.34983	14.442	11.3489	12.0479	10.7122	11.4206	10.2038	8.22929	9.33646	8.89395	12.3654	11.1463	5.90726	6.62784	5.69951	21.2573	10.6238	8.13596	11.1501	9.92385	8.37088	8.76339	12.2912	11.821	13.9761	10.2599	10.6006
Srpra	8.87084	3.2997	21.43	9.09152	9.54711	10.4023	5.30573	6.6722	10.3437	10.2038	5.38201	4.60154	10.1999	8.18026	5.14707	9.74148	7.04361	9.435	20.5017	6.834	8.2325	4.34721	6.97119	10.2531	7.39767	4.57541	9.63741	6.39093	7.70008	6.80946
Psmc6	6.41261	5.23803	4.18382	4.96596	5.35259	7.68406	5.75011	6.39164	5.09748	7.45545	21.3482	8.41711	8.86059	7.17661	8.4687	6.53971	6.79904	6.18731	10.2072	9.95712	7.5567	3.82554	3.86811	5.42661	6.12387	8.43986	24.2758	5.68996	7.65489	7.63264
Cct7	21.3937	7.97207	3.81774	10.9433	4.43728	7.09181	5.92069	5.89684	6.39493	8.02974	5.5704	4.96357	5.81491	5.41291	6.46894	5.12548	5.93489	9.77731	5.04463	4.93031	10.0273	22.7115	8.33793	5.94035	10.7157	5.46083	5.33248	4.40053	4.81153	5.19513
Mtx2	4.33921	4.48382	7.28548	5.12967	4.15472	7.48158	6.45485	5.57037	7.26673	7.77849	6.94908	8.85535	6.425	8.38489	7.39377	8.55564	7.41861	7.87748	20.5542	10.1326	5.05096	6.48476	5.33799	5.34027	6.55285	9.38635	21.736	8.11306	11.3365	11.2226
Agtpbp1	12.4561	8.29638	12.825	21.279	10.2953	7.90679	9.88427	6.63649	9.93855	7.97846	7.65127	8.96015	20.233	7.98538	8.18302	9.74148	5.0096	8.57494	7.65212	8.05342	9.79474	6.75196	5.64744	6.35479	8.89471	7.57625	9.0242	8.61499	8.73964	11.3964
Col4a1	9.82508	11.5961	12.0325	20.9189	8.27761	11.5413	9.74512	8.55959	12.5847	14.0238	7.8311	7.50728	9.19899	9.23264	9.13206	8.10326	7.09252	7.32977	10.1679	8.30345	12.4497	10.1703	25.2545	8.06005	13.9855	14.3412	13.0888	12.3102	9.60251	9.6677
Palld	14.769	12.4521	13.5572	7.75272	9.88936	8.43829	8.16507	10.1154	12.0052	8.53224	8.84585	10.1891	10.5622	10.6309	10.4055	9.96547	7.16589	6.46543	9.45159	9.52286	8.2325	25.3241	11.6086	7.11892	7.34076	24.6043	9.13607	8.46788	10.0463	10.9345
Mrpl41	12.9391	6.79926	9.2205	10.3685	24.8289	7.08169	6.32468	8.17191	5.67697	5.91719	8.72168	7.34532	7.85966	25.2765	7.03546	7.23803	5.55581	5.02344	9.48653	9.286	6.09977	7.87163	7.38809	7.36499	7.20069	10.1671	12.0613	11.9338	6.61944	10.8476
Mbd2	9.32636	8.73383	5.59184	6.18471	9.25262	5.08221	5.8758	7.55468	6.39493	7.09652	6.13986	4.06803	9.86151	8.72107	8.85122	8.95092	9.17951	20.0767	8.67415	9.48339	7.87704	4.17756	7.47835	7.86578	7.31012	11.7198	22.7925	12.215	11.1516	11.0259
Klhdc2	10.6419	7.16129	14.7842	20.9189	8.89047	6.77797	5.05435	10.4011	10.1539	8.48609	6.32397	7.04522	25.9049	12.9257	10.7541	8.81038	5.10743	6.75212	7.00571	6.04007	5.98129	4.86463	4.9039	7.44702	8.27751	13.8222	13.499	5.29621	5.37444	6.01373
Ccni	12.9823	7.50445	10.3711	10.5467	12.3488	9.88602	5.46283	11.3754	9.96932	24.4225	9.75783	11.1561	9.76619	10.7771	7.92639	6.2147	4.43486	6.79919	4.29777	10.3256	9.47878	9.15246	20.5397	5.20212	9.44188	9.1072	5.02587	6.28708	8.13152	6.10977
Pdcl3	10.8147	5.55103	11.4894	11.8892	13.662	4.35835	7.96757	24.73	8.35905	5.93257	6.50808	6.17826	8.20283	6.80146	8.13944	10.9669	9.42408	8.55782	22.6594	8.6719	9.40857	8.64352	6.3394	8.17229	5.97066	7.62423	4.14748	10.3328	8.45612	8.56099
Snrpd2	5.9296	9.42394	11.8273	21.6174	11.6006	10.0936	6.45485	7.70261	9.22572	9.60902	6.46098	6.38786	8.89872	6.44092	6.4641	7.61575	5.25825	8.94292	5.93127	22.3531	6.9906	8.32543	4.36667	6.95919	7.39329	14.1057	3.69586	3.55677	7.35904	6.21038
Bloc1s1	10.5358	11.679	14.9049	21.279	9.65456	9.14191	7.14163	12.2783	8.89751	9.48083	5.67744	9.4889	10.9482	9.92935	8.02323	6.2103	7.72432	8.02296	5.90069	20.3266	6.97744	6.73075	11.3636	9.3595	6.12387	14.1101	5.97884	8.04816	5.169	4.82928
Fmod	8.92975	5.05702	8.6412	10.9542	5.70678	6.79316	6.20797	6.13148	7.2257	6.18895	4.82111	9.04589	4.81875	6.73325	6.70136	19.2546	4.71204	5.30585	8.99736	6.84278	9.87373	7.29907	10.5427	4.55887	7.10439	5.53934	21.8437	4.51303	5.2635	5.54727
Cct2	8.61167	5.40396	5.02059	6.3557	11.0554	5.87694	4.89276	5.96315	7.75391	4.15331	20.5433	7.75498	6.52509	7.83922	4.67255	7.59379	7.35747	7.21852	9.29436	9.33425	8.11401	4.09274	3.73058	9.54082	8.89909	10.6076	3.89888	7.84479	9.16285	23.0808
Dyrk2	5.74504	13.7833	9.30901	12.5404	11.525	6.20597	6.00597	10.3297	9.68726	9.37316	6.69219	10.1224	10.3143	12.9257	11.7855	6.13564	11.0953	9.00283	5.07084	9.20266	8.66694	8.01159	23.776	7.46861	9.58195	14.2365	13.3913	11.341	6.47974	6.14635
St13	7.70456	11.2152	6.20332	11.147	6.31964	6.56537	7.33016	7.32513	6.27185	6.93244	5.35204	8.80295	9.69946	10.5968	9.70341	7.99785	20.4419	10.3165	8.65231	5.08383	4.68234	6.73499	7.9898	6.78218	10.151	5.52189	10.7851	21.3925	10.3339	9.6677
Pja2	11.0778	6.74647	11.0389	13.5263	12.2851	7.86629	8.61844	6.95276	5.37441	4.80451	9.59941	11.28	8.11704	27.2302	12.5747	7.93636	7.68764	9.61471	4.7389	8.11922	11.6422	12.5539	6.23195	6.16915	8.46136	9.76145	9.88601	6.85824	4.90192	9.73172
Gadl1	6.28695	11.6036	9.22452	3.75448	24.2518	5.86175	7.18652	6.98336	6.30262	6.15306	8.5761	9.37457	5.54323	7.94153	4.96792	10.4574	10.3942	4.68969	11.3078	10.0975	4.38394	22.8387	5.5271	9.28179	6.45217	6.77806	3.84916	6.10102	6.23321	7.89331
Pcmtd1	22.7131	9.32212	14.7158	13.5445	15.5165	9.62786	7.58153	9.74814	11.3386	11.8293	6.04994	9.37457	23.8793	11.7905	11.0301	10.2817	6.25691	8.77177	5.4945	10.8563	10.2292	9.68685	10.8092	5.78925	10.5975	11.541	11.2409	8.07845	7.50697	9.48935
Pip4k2b	4.27246	9.17127	6.31596	11.0634	6.59025	11.2932	9.89325	6.06007	10.8668	7.79387	6.59371	7.80738	9.30862	11.0938	11.1609	10.5101	9.60343	9.14403	11.5219	9.45707	11.0015	8.47387	7.59009	10.823	23.318	7.97316	12.6372	12.3881	17.4012	8.67075
Mrpl23	13.0255	9.42394	11.2641	21.9412	15.3693	6.32746	8.32667	10.5847	10.4411	6.93244	5.72454	12.6376	10.7242	24.3167	10.604	5.73597	6.94578	5.34008	5.7915	8.65436	12.182	12.4436	10.6889	8.60401	6.20266	12.0164	7.51602	8.29912	4.42529	5.61586
Psmd7	9.26353	7.63644	9.59865	6.07921	22.9624	8.65596	6.60747	7.58529	8.12828	6.77862	8.88438	9.37457	9.76619	9.66138	5.53927	10.6067	9.50561	9.23389	10.4824	8.01394	9.94833	22.4698	5.91391	10.1409	10.4924	8.8106	11.9494	9.95635	8.06578	4.83842
Usp14	5.48194	3.88421	9.80785	11.8055	7.62097	4.09007	9.89774	7.01397	6.94365	9.19882	5.88296	7.75022	5.22865	6.32399	4.07698	5.30116	9.39555	16.7091	4.62097	5.44352	9.71136	6.36177	6.92821	9.0314	7.59903	5.10753	10.4081	7.63277	4.95534	5.37806
Stradb	7.74383	3.25444	10.532	10.2484	5.60729	12.7561	22.4169	6.43245	8.68726	11.8241	4.59419	8.19799	5.34781	5.70036	6.44473	7.50156	8.35205	8.13849	9.801	8.11922	4.55069	7.73167	23.3763	9.92504	8.81154	6.00604	10.4702	4.5563	6.51672	7.13873
Psme1	8.27788	11.5207	13.6014	7.05057	10.4545	6.7071	7.51869	6.35593	6.50262	6.39918	10.1089	8.85535	9.05124	8.49695	5.63612	7.036	7.26779	8.12137	6.70871	10.0229	9.46562	9.34332	11.9739	17.4066	5.11709	23.9631	9.72028	12.1112	5.77712	9.49392
Tomm6	8.27788	11.679	10.721	20.0712	7.9672	12.0475	8.6723	7.48327	8.62572	9.09114	8.5761	8.9792	5.69575	24.9598	8.7108	8.69179	8.22977	11.1637	8.24175	9.38688	4.57702	9.82681	8.88806	7.32614	10.8514	13.796	7.2467	12.7472	8.73553	10.3034
Tor1aip1	22.2458	13.4213	8.52454	8.88415	13.284	9.60761	7.13714	7.23331	7.65135	7.41443	5.51902	7.09762	25.9049	13.106	10.6718	9.9523	6.70121	9.64039	7.30708	10.3343	9.44806	10.0643	10.8393	9.04435	4.48237	13.5997	11.3238	13.0198	6.75093	5.54727
Dnajb4	22.5207	9.61249	14.5911	13.2462	9.56701	5.93262	5.68727	6.33553	7.30263	7.39392	7.06041	4.55867	7.43069	5.98782	7.49545	6.62755	20.4827	6.66654	6.94019	6.54011	8.01747	8.24061	4.64173	10.3093	7.29699	14.3369	5.66395	11.791	11.5789	9.02288
Glud1	5.51728	16.359	6.64584	5.32249	5.52371	4.89492	9.51619	5.33572	5.50261	6.7376	5.60465	5.66857	5.36687	11.1084	9.97941	4.14167	4.58568	5.03628	6.57331	6.07954	5.20017	8.0031	10.0743	2.49097	8.16808	5.10753	4.0729	5.07121	6.29073	19.4177
Zfp706	7.97944	6.31279	8.19868	8.11288	11.3578	8.15482	8.28178	3.91762	7.28724	8.68094	6.98762	11.6658	9.53264	11.3423	9.38384	10.0928	15.5709	21.6684	9.6525	10.716	9.29886	9.9498	12.8077	4.79631	13.8017	11.8943	6.13629	7.63277	9.09711	10.0701
Naa38	9.84079	12.3201	15.4158	21.279	9.98885	8.93437	8.94612	9.16662	9.94881	10.2397	8.833	11.4658	9.95684	10.0658	23.3434	5.75354	9.6442	11.4204	6.55584	5.80759	14.9028	12.2782	11.0843	9.57967	11.2497	7.43231	7.22184	6.65488	6.49207	7.71495
Larp4b	14.0858	4.12934	9.50211	7.56717	12.4642	10.9085	9.39499	10.8092	9.91804	7.14267	8.95717	9.66991	5.36211	10.4702	9.15627	10.6243	9.79909	20.787	9.43412	6.63223	11.0366	10.094	10.2591	9.84733	9.58195	13.7175	13.2918	22.4483	7.71241	6.8552
Cited2	21.0521	10.7061	11.775	3.19786	7.14342	7.51195	7.58153	10.2633	9.35393	5.79926	8.13938	4.90164	8.46021	7.32277	9.94552	5.1123	8.97978	5.14753	19.4622	6.2857	8.22372	3.97823	7.43966	10.4949	4.014	4.8153	7.80606	4.66014	5.65385	5.79422
Rnf146	7.3158	12.5351	12.8492	13.7592	13.4073	12.4119	9.5925	7.6618	9.30265	12.865	6.33681	10.7179	10.4144	7.97563	11.7225	9.60972	6.35881	9.53341	9.73112	9.03159	10.3477	23.9499	6.59728	8.02551	12.1208	23.7974	11.1166	11.5876	9.09711	9.98325
Smpdl3a	15.9	8.09651	10.0894	8.49852	6.12862	7.58788	5.32817	6.98846	6.18467	7.73747	19.1389	6.43073	9.46114	9.63702	4.77908	8.43266	10.1252	8.96004	8.98425	8.33415	10.7251	6.49324	10.1473	9.9639	9.82708	11.0874	9.41782	8.28182	10.753	6.76373
Ipo13	10.9521	8.50379	4.69473	6.73042	12.886	6.54512	14.7232	9.14622	6.09236	6.89655	9.23976	4.49198	9.76142	9.72472	8.8948	8.24381	8.22977	5.24167	4.68212	7.63671	7.08276	7.30331	8.52273	9.93799	5.93127	6.76934	12.604	8.98711	19.8172	5.60214
Lrpprc	5.14423	4.73271	3.99877	18.4486	7.00811	8.9698	5.83091	5.86623	4.50773	10.5627	5.13795	5.17316	6.65378	4.74543	9.22405	10.7648	5.66179	20.727	6.76112	8.32976	9.64993	12.5581	8.31214	5.8281	10.1247	4.93307	6.65006	6.03612	5.30459	5.90855
Cox6a1	8.48601	13.7833	10.0452	21.9412	8.54027	11.1363	7.02492	8.72793	9.06675	12.2959	8.43053	11.28	8.17424	10.6602	11.0931	4.69067	9.85208	21.6684	5.32853	10.2861	13.4327	14.3903	9.28346	10.2704	9.80957	13.8222	12.8319	7.32556	6.49618	8.28203
Stt3b	11.3801	9.68414	8.28316	3.67081	9.74211	6.98045	6.89924	7.72302	7.98469	6.53249	7.84823	7.13096	9.99497	11.5907	11.4562	8.8543	12.7135	10.4534	9.76606	6.85155	7.82438	6.73923	10.9768	7.40385	22.4425	6.22413	11.7795	8.97413	6.65231	7.00154
Psmc4	3.71091	10.0122	4.37692	10.1175	6.80117	5.50235	10.3421	9.00849	11.8668	9.68081	6.68362	6.54505	9.33722	8.53593	7.65524	7.32148	11.0953	11.2707	4.87866	6.00497	23.7233	8.76227	12.8077	4.23509	10.9958	8.60997	5.31591	8.89625	4.80742	4.92074
Ube2s	11.011	12.3201	12.5837	4.82044	10.2356	9.09129	9.01794	6.72321	8.62059	7.5016	8.52901	10.9037	24.4703	8.69183	12.2503	4.87952	18.3713	10.2138	4.60787	10.3958	10.7602	6.21757	8.09724	4.04082	10.3786	7.91646	4.08948	7.67604	4.26915	8.09453
Gsto1	12.7388	5.13621	12.821	4.94049	10.6256	6.71216	5.4763	7.40675	4.86158	23.879	9.5566	5.70668	4.85688	7.47381	6.72073	5.23528	9.57898	6.11884	8.019	7.1893	16.8424	8.13882	9.64019	6.55769	5.85685	11.746	3.94032	6.14429	6.00722	6.48934
LOC100911295	12.8723	11.9128	11.6584	21.2026	7.60903	9.81515	8.12018	7.25882	6.31288	9.42443	17.2079	8.7315	7.65947	8.94518	3.68962	9.5087	7.19035	5.8835	10.7968	10.0712	7.46015	6.24301	8.7978	11.0216	7.86604	10.5989	9.57112	7.36883	10.1161	9.89179
LOC685273	4.36277	4.67991	6.34815	4.23835	9.78589	5.92756	6.62991	5.50915	6.60519	5.78387	15.9191	11.2704	7.72144	6.05603	7.67461	4.68188	5.40499	5.63105	5.9269	19.3133	7.10909	6.49749	4.0873	5.67269	4.87196	5.3954	5.19989	6.29141	3.58707	5.14025
LOC100359980	6.08668	3.88044	8.47626	8.16018	5.44014	9.22796	9.1122	7.02417	5.47184	10.332	6.85489	6.43549	8.10751	4.36541	8.64785	4.98933	9.21212	19.944	7.72637	4.75924	8.32904	8.78348	8.31644	10.2272	5.57233	11.541	8.76317	25.0229	9.85315	8.92227
Zranb2	8.19935	8.37935	5.61195	19.973	7.50954	8.60028	7.93614	7.20781	9.40008	8.22459	6.54661	8.30278	6.53462	8.76491	8.36217	8.97727	7.80585	5.68239	5.84391	8.80349	10.1107	9.92012	10.4525	17.4843	10.4487	12.0208	8.27011	7.34719	7.96305	4.71952
LOC100360205	14.4942	20.526	14.7842	8.53126	14.7763	22.7434	4.4753	6.49366	5.68723	6.37354	5.06517	8.73626	5.87687	5.89037	9.95036	9.94791	6.81126	7.77906	10.4562	9.86939	10.7865	10.0261	7.31073	8.89325	5.20026	10.6163	7.38343	11.5876	7.8439	7.75611
Cav3	15.1421	21.5706	14.4221	9.63359	15.7474	13.0194	7.12368	10.1868	9.4206	11.2755	9.53947	11.0751	7.86919	12.0536	11.3691	7.60257	8.55179	19.1353	10.7925	6.20236	11.787	11.1331	12.7003	9.5106	9.83146	14.3499	10.3915	13.6602	11.016	9.79575
Homer1	12.1655	5.7773	9.36533	20.9189	8.68751	7.8258	8.42093	7.88625	7.5693	8.75785	8.60179	10.051	6.74911	12.8331	25.7257	7.44885	5.07482	9.55481	11.0414	8.53592	9.7728	8.43994	8.62588	8.11617	7.92295	7.8205	13.1758	6.72411	6.72627	4.69208
Car14	21.4565	13.3836	10.1176	9.63359	11.1509	6.88427	5.57505	6.96296	8.77956	6.91193	6.97049	8.4314	9.056	6.2168	5.24391	9.7327	20.5724	5.28446	8.19371	6.04884	9.19793	11.7947	12.3522	6.23823	8.73713	7.24476	11.5061	11.3929	10.1367	8.59758
LOC100364138	11.0424	8.16439	6.91538	21.1844	11.7717	8.06877	7.43789	7.26902	8.29238	6.00948	5.87011	11.5658	10.0569	8.7503	4.58055	8.29651	7.76101	19.9654	7.2765	5.82513	13.595	11.4173	14.0326	7.15777	13.8017	11.4451	10.8348	9.57558	4.95534	4.92074
Rnf14	10.1	5.22672	12.821	15.7164	11.2981	8.65596	7.3526	8.79424	9.5488	7.76823	5.86583	8.0265	10.4716	11.7905	12.2552	10.1543	8.52733	21.6684	10.2028	9.17195	12.7832	9.97525	8.72474	8.92779	13.0488	13.1112	10.1015	7.60248	9.22449	8.93599
Col6a3	10.9128	22.4002	12.6722	9.86643	13.0333	11.5767	10.0234	10.4572	10.8668	7.4452	10.4643	10.8608	6.71574	11.1181	9.98909	8.2482	9.50968	7.34689	9.47343	9.44391	11.2034	25.3241	10.186	9.25157	13.0488	11.8507	11.0213	8.55442	9.01493	10.5686
Eif4b	12.3815	9.90663	12.4348	12.4058	21.4621	12.0272	7.87779	12.2426	12.7899	11.8293	9.48381	5.96391	9.0989	25.2813	9.46616	9.65803	10.439	8.48508	8.94931	10.6765	10.7602	9.62323	8.69035	10.7453	11.6524	7.99933	11.8831	9.69241	5.80588	9.14178
LOC102553099	7.42182	6.16949	8.7458	5.26064	3.24339	8.04346	7.46931	8.44737	6.20005	8.39379	6.25546	6.4736	9.17993	5.61754	5.17612	8.21306	4.9077	20.7356	8.52128	4.93469	7.52598	5.99703	8.35512	8.67308	5.42788	9.56954	7.1224	18.1646	4.32257	5.11739
Rdh14	7.16265	10.7287	7.36192	10.7796	7.32648	6.65142	6.82742	6.74871	8.01546	6.51711	5.52758	8.65528	6.98266	8.63824	6.68683	6.1576	5.30716	9.30235	7.86177	6.85593	13.0421	25.3241	10.186	7.58517	13.3289	11.7504	10.6608	10.2636	20.8034	4.64635
LOC100359574	12.0516	6.92748	8.13834	8.52399	6.248	7.84098	8.02143	7.56999	9.52316	8.19382	5.73738	11.1609	11.9301	11.0499	6.24137	4.03187	7.85069	21.6898	8.49508	8.00517	9.29886	11.7269	14.0069	18.5895	14.3445	9.41688	5.05902	7.00969	6.95226	8.52441
Mrps24	13.1276	9.32212	24.1978	10.8014	13.1964	5.38087	9.35908	6.48346	5.39492	5.54288	7.06897	7.57873	5.64809	7.86845	7.4083	5.64813	5.78815	5.41282	9.53894	5.66722	5.81014	10.8871	8.76772	4.0624	8.34317	11.541	8.57257	10.2982	14.1922	4.93446
Rnaset2	4.27246	4.28395	8.56075	4.8932	6.00525	5.91744	4.12518	5.57547	6.09749	6.8863	6.31968	6.04965	6.69668	5.20828	5.28265	13.9227	7.22296	5.48129	6.31999	7.29457	6.85456	5.97582	9.08146	7.67583	6.08447	4.45764	5.08388	5.56015	20.1008	3.92836
Fbn1	9.60125	21.1746	13.5572	11.0634	11.8593	9.9417	7.33016	12.2579	12.8309	10.5269	9.3468	9.97001	8.05031	9.9196	8.43965	19.4917	4.94846	5.5797	7.83993	10.2598	9.53583	9.6402	9.33074	8.65149	9.09169	12.2912	8.10852	12.678	7.49464	10.6235
Atp6v1e1	4.9361	3.65795	6.32803	8.24749	5.16953	7.3196	8.79799	9.11561	24.4669	5.34803	5.74166	8.91251	8.11704	9.4665	7.45187	8.25259	5.352	6.01187	19.436	8.67629	3.80468	6.33208	9.46827	6.03101	9.01728	4.29626	7.23013	6.98373	8.18083	6.63111
Ube2q2	13.0923	9.41262	5.53954	9.53537	10.7649	9.13685	8.26382	11.0183	7.20006	9.20907	9.83062	11.5991	10.7719	10.0658	9.31121	20.2428	7.92406	7.98017	9.28999	10.6414	11.572	10.1703	4.87812	6.32889	12.1733	8.8106	11.6138	12.1328	8.96563	19.3628
Maf1	8.42711	10.7853	11.8796	8.86596	11.0713	7.95235	5.64238	6.52937	8.75905	7.51698	9.47096	5.9258	6.70621	5.79293	9.81478	6.47382	17.0057	7.78334	10.478	9.52286	10.7251	6.26422	11.153	6.95055	11.6524	5.4303	18.9268	11.7088	7.04266	11.5427
Bckdhb	12.0516	8.13422	8.33144	10.5031	4.90687	8.03334	6.32916	8.98298	8.81033	9.14242	8.03234	9.69373	10.3048	7.77588	8.34281	6.11807	7.41046	7.54372	22.0785	6.33395	11.5852	6.29815	10.4525	5.46115	11.2322	12.4003	12.0696	13.2968	22.0114	8.31861
Fsd2	4.94788	7.23294	4.97634	5.02053	5.0382	5.93768	8.76208	24.6739	6.37442	6.56839	5.05232	12.5614	8.26956	8.56029	10.3522	4.41836	5.38053	11.2707	5.90069	4.07935	6.90284	8.69017	6.73481	4.17465	10.5493	5.6353	4.06462	12.3665	5.55935	4.29421
Gadd45gip1	9.00436	14.0888	8.60097	10.856	24.2836	8.11939	7.46931	7.167	6.33852	6.42482	5.5233	9.66038	7.6833	10.3289	11.0931	5.49001	7.64688	8.98999	4.74763	8.5754	11.0761	5.41598	11.5356	4.42072	6.90303	14.2365	6.88623	7.39479	14.2127	4.66464
Xbp1	4.1468	4.8647	8.83833	7.34889	3.47819	9.98726	7.33465	9.84506	6.95904	6.80938	6.89342	6.60221	5.66239	4.88672	5.08412	10.3344	8.38059	5.87067	20.4275	4.96101	4.92809	4.21149	8.36371	5.45683	9.35433	6.25466	4.61154	8.06114	17.1752	6.24696
LOC306766	7.48858	9.68791	7.12457	8.05104	8.5522	6.15535	20.4463	7.54448	8.14366	6.62479	5.91293	6.52123	10.8386	22.6602	9.64531	5.63495	6.46071	7.56084	3.52032	4.53992	4.51559	4.91128	6.7477	9.82575	4.2854	5.6353	6.58377	4.14956	7.62201	8.71191
Nid1	11.7571	11.8865	8.42799	13.319	14.0401	6.61599	8.38502	6.6926	6.71801	7.0914	6.59799	9.56511	7.30677	11.2302	12.3375	6.73735	6.583	6.0675	6.43355	8.77718	10.589	13.4912	11.2132	22.5181	13.8017	14.2583	6.15286	12.6304	16.978	6.09605
Cdkn1b	10.2099	6.36559	4.40911	5.70449	3.90003	6.454	6.02393	10.0134	24.4618	5.66081	8.81587	7.3215	4.07997	6.88915	4.43529	8.12522	5.33162	4.41584	6.34619	8.87368	10.3477	6.91736	3.94977	4.80495	9.36746	8.13454	6.0037	22.4483	5.57989	4.98019
Mrps28	7.67314	8.79794	7.98547	10.4958	9.2566	5.58335	6.32916	23.4955	8.48725	7.91693	6.19552	7.8836	5.85304	5.42752	5.84916	7.58061	8.47434	8.19411	9.66561	22.5066	7.51281	11.5233	9.70036	6.51021	8.18996	9.63932	4.03147	7.18277	9.47102	9.23325
Egln1	10.1117	7.10472	11.1676	7.5599	4.09901	7.2133	6.60747	10.3807	9.82573	8.08101	18.5694	8.80772	8.39349	11.1084	8.22176	5.29677	9.59528	4.62122	9.19827	9.18511	8.50457	9.8565	10.1044	8.80691	5.28342	9.88358	4.82699	12.6304	5.31692	23.3141
Emp1	9.59732	13.7343	10.4234	21.5664	14.2232	8.56991	7.22243	7.82504	8.15905	7.2965	8.41768	7.58826	9.07507	9.61266	8.27986	8.78402	9.71757	5.97336	7.60844	10.5975	25.7288	8.10065	8.01988	8.23273	12.1471	12.1298	12.8319	10.2592	11.1146	10.4268
Bnip3l	13.803	21.8723	14.3779	12.9806	8.03485	6.04399	6.73315	7.48837	6.11287	8.69119	17.1308	10.232	9.1132	12.1803	10.1779	8.84551	4.62644	7.98017	6.26321	6.11463	8.17545	5.22089	5.96548	8.60401	4.56117	8.30901	12.7698	13.2016	6.21266	6.80489
R3hdm1	11.5608	9.08077	14.7842	21.9412	14.5017	8.60534	7.18203	9.13091	9.94368	7.49647	5.15936	8.3266	10.5336	6.35322	9.379	8.7972	7.2841	6.37558	5.69541	7.69374	11.4272	11.7057	24.2273	6.84262	9.87085	8.36135	12.5916	7.00536	11.1146	8.6616
Hrasls	9.76225	10.0122	10.5963	7.15607	10.5898	7.38541	7.24936	4.21348	7.72827	8.35277	9.83062	11.6658	9.1561	10.7186	6.63841	9.21005	5.21341	8.36099	4.07502	9.61936	12.9017	12.1807	23.0797	6.09145	14.3445	20.2469	4.03561	7.80152	7.23989	6.26068
Ywhaq	12.138	20.6504	8.85039	11.7	9.26058	9.10647	5.80847	10.3348	10.877	6.03	6.69219	12.5471	10.0426	11.6395	10.1392	11.2787	7.30448	6.42692	20.5542	11.08	9.72014	12.8465	10.9983	7.33477	8.17683	8.79316	12.7615	10.6054	9.90246	12.4299
Atf1	10.795	5.74336	7.22514	7.09423	6.51862	5.89213	19.405	6.98336	10.4975	7.93744	4.7312	11.1752	10.872	8.90621	9.41774	10.6989	4.68351	10.8855	9.26378	6.37343	25.4435	8.71138	13.8607	8.59105	8.04114	7.84231	7.26742	8.0222	5.07449	5.44666
Uaca	12.2833	5.59252	8.54063	11.1579	11.5688	10.0126	12.0479	10.7428	11.9232	11.2909	9.83062	9.34123	10.8052	10.3483	10.667	9.24518	10.007	20.7741	5.70852	9.44391	12.261	13.8856	12.8593	10.9698	13.8017	12.6707	11.4729	11.3496	16.1028	10.7287
Cox17	8.05405	9.04306	8.8866	6.29749	8.14628	6.20597	6.72418	21.6744	6.29236	5.94795	5.67316	8.79343	9.23236	9.10109	8.26049	10.0445	8.76375	8.85307	9.09344	4.41271	11.3263	5.53474	12.292	4.83948	11.6087	7.03104	7.342	24.5166	7.75761	7.93447
Lactb2	9.76618	3.36003	6.7263	3.36885	8.95415	7.13231	6.46383	6.08557	6.83083	6.81451	13.8083	5.89722	5.24772	7.86358	6.86115	7.00087	9.57898	7.03025	5.049	4.92153	9.68503	11.3494	7.85656	10.0589	20.6872	4.29626	11.1166	4.99332	10.6421	10.8064
Eif3a	23.3454	8.11914	10.8377	8.85869	9.88936	8.9293	7.53216	10.5184	8.4411	9.35265	5.44195	11.2562	21.2292	12.3508	11.3158	9.99183	5.23787	5.50696	9.74422	11.0406	12.6472	8.27454	10.4654	6.81672	12.0201	14.3761	10.4702	5.7116	8.62048	6.56708
Usp47	12.6524	4.74402	15.0738	11.6636	15.7474	8.60534	10.2748	7.00887	8.27187	8.03487	8.73881	19.0445	10.8338	9.05237	9.78089	10.9317	9.35887	8.30537	11.3734	7.37353	4.54631	8.87255	9.15882	6.38933	10.348	10.058	12.6372	8.11306	11.5173	25.0061
Usp9x	8.92975	10.5703	15.0738	20.7843	14.5535	13.7078	8.82043	5.83562	8.89239	10.6448	9.2526	7.80738	5.67668	10.3386	11.8775	8.27455	6.32213	9.6789	7.32891	10.8958	6.95111	6.05216	8.95252	18.4298	8.30377	14.3412	13.2918	10.0862	4.54445	9.28813
Ccdc53	11.6314	9.30703	4.31256	4.5403	10.5977	8.5446	8.09774	7.28943	6.04621	5.57364	21.0528	9.5413	9.38488	12.0195	11.8775	9.65803	7.13328	4.6255	10.6789	6.23745	11.9538	9.3518	5.41106	5.59066	12.0902	11.6108	3.89888	8.84	7.12895	19.5275
Arglu1	13.9719	6.27508	9.35326	8.70953	3.94778	7.66888	8.79799	6.95276	8.37443	7.54262	9.13271	9.71278	11.1532	10.6797	8.42028	8.20428	9.18359	4.29175	10.1024	21.2609	11.787	6.8283	9.24478	10.1538	9.4769	11.5323	11.2947	21.9291	8.51365	8.05794
Rraga	10.0646	10.2347	3.52407	8.89507	6.40321	10.8782	11.4509	5.90704	10.0719	24.8481	7.24452	5.38276	6.8063	9.90499	9.84383	8.27455	9.40778	5.5797	9.18953	4.78117	10.4925	19.1786	4.17756	7.43839	8.08491	6.70827	6.02442	4.27072	7.94251	5.18141
LOC100910861	8.92975	19.4739	12.4227	8.44395	11.8593	8.27631	11.3162	8.86566	12.5693	10.5269	10.2588	8.42187	9.90441	10.5237	10.0133	9.44722	21.6281	6.99174	9.80537	9.99221	10.8392	8.79196	11.2863	6.11735	9.45501	14.1755	7.91793	11.7088	7.22756	10.6235
Oxa1l	7.86163	12.7651	12.2015	12.8533	9.15313	6.19078	8.03939	9.75834	6.99493	7.08114	7.3173	8.19322	9.73759	7.38611	8.36702	6.78566	6.84387	6.7778	6.88341	10.1282	21.8275	10.3485	9.45968	9.17818	11.8494	24.3862	12.8734	11.9295	8.09043	7.35367
Yipf7	4.25675	4.97783	4.21198	6.73406	6.38729	5.80101	17.8967	11.5998	10.9847	9.35265	8.27211	4.673	6.792	4.63824	4.76939	8.43705	5.02998	18.3865	8.70472	5.48299	8.01308	6.2727	5.35518	6.35911	8.09366	4.54051	10.3294	7.21738	7.68365	4.61891
Satb1	9.43632	9.36737	8.68948	3.9764	11.7717	7.65875	8.2728	8.08009	9.27188	7.88617	6.6879	9.3841	11.0674	10.1876	10.6573	9.65803	3.45658	7.97161	8.91874	10.1896	13.4327	14.3734	12.5757	4.89992	23.7645	10.1147	9.88601	6.01016	15.9097	9.77746
Cuta	10.6576	9.5974	2.71144	9.66634	12.0821	5.68965	8.84736	8.17191	6.06159	7.47596	4.70551	7.54539	6.38687	6.54811	6.98704	18.7275	8.76782	6.49111	5.65611	8.59733	8.60551	4.55503	5.59587	9.14365	7.89231	4.16541	7.73148	3.88994	18.8516	3.79574
Sorbs1	23.3454	11.9581	13.2756	11.0634	9.88936	13.9052	8.43889	10.7173	9.91804	11.8139	10.9224	11.461	9.27049	9.58343	10.7783	10.8043	9.00424	5.4385	21.847	11.1239	12.1293	11.7862	7.34081	8.51766	12.0945	13.1112	10.3003	11.8429	8.84236	10.3583
Serpinh1	14.4942	13.64	15.2106	21.1844	12.1299	11.5058	10.7775	10.7122	10.3027	10.4807	7.33443	10.575	8.49834	11.0938	12.4246	9.2364	10.1456	11.2707	9.91893	8.60172	25.4435	14.3734	9.28346	9.53219	11.3679	13.8222	8.10852	9.93472	10.8434	9.69971
Grtp1	15.1421	9.61249	13.5572	21.5664	10.5261	10.7972	8.5152	6.79972	10.5129	8.19382	7.54423	9.00778	10.7099	8.6285	8.21207	6.51775	5.97158	7.59079	9.38171	7.16737	8.88636	5.97158	6.07723	21.9396	9.78331	3.83828	6.74536	6.2741	7.68776	6.01373
Mrps18b	4.66907	3.34872	7.79237	11.9474	8.85068	7.30441	5.83989	11.304	8.48725	7.27599	6.34966	9.65086	9.54217	5.43727	10.2506	8.35361	21.0656	11.8483	7.35075	6.25939	4.76572	3.44808	7.62018	7.17504	7.40642	13.2813	9.07392	9.87847	10.0093	8.97258
Bzw1	12.4757	11.3434	8.59695	10.4558	14.2232	12.4119	10.1671	8.62081	13.9078	10.1474	7.79257	10.9942	11.9301	12.3069	12.0276	10.0314	8.90641	9.31947	20.0431	9.9308	11.5237	11.9304	12.7089	8.28454	6.39526	14.1755	13.0764	6.87988	22.0114	11.5473
Sos2	6.36156	14.6205	10.721	9.25524	14.0401	12.5689	7.89126	10.5847	12.2565	10.7627	7.21883	11.5277	5.39547	11.0012	10.3135	8.3009	8.3439	8.96004	8.94931	10.0624	13.7486	11.3324	22.6886	7.36068	11.311	13.796	21.4708	10.679	9.37652	11.0397
Ehbp1l1	10.4337	9.97451	4.87979	9.25524	22.4291	5.23913	5.56159	6.41714	6.88724	7.52724	5.59181	8.85059	8.42208	9.3788	4.9195	7.32588	6.29767	7.82613	4.88303	4.20655	9.00484	7.12942	8.40239	4.99058	22.7008	6.01913	12.604	4.03706	4.84029	5.75306
Ankrd40	11.6982	6.21852	12.3906	18.3649	13.674	9.77465	5.70971	6.03456	8.477	7.71183	4.85965	11.5324	8.15994	12.5895	11.3158	9.53945	10.5328	5.54119	10.2683	8.27713	8.82492	7.43903	9.37372	20.1177	9.93214	11.5803	13.6399	13.1323	7.40835	6.4116
Uba1	5.69792	11.3434	3.68498	14.1412	11.0793	5.65928	6.89475	5.16738	6.84109	6.50686	12.6993	8.84582	6.3392	6.16808	5.58285	5.5515	5.69847	5.70807	7.5473	6.08393	9.01801	7.70622	5.49272	22.4015	6.6579	7.61114	6.23159	6.56834	6.01132	4.71037
Col5a2	14.0033	8.39443	12.9055	21.5664	11.7876	10.8225	9.63739	12.2579	12.7847	8.52711	10.8154	11.2133	7.37349	12.1608	12.3375	10.6199	7.96482	7.34689	10.3339	9.76411	9.00484	22.4698	7.38379	7.67583	11.6087	10.9042	12.5916	10.6963	9.52444	10.4177
RGD1302996	5.93353	5.5812	8.74982	3.34338	4.33381	5.34543	3.7975	7.49347	5.61031	6.21971	5.2664	9.37934	6.06276	6.1827	6.53189	7.63332	9.41593	5.77653	20.4712	5.65406	4.8491	7.51113	5.07582	6.06986	3.90895	4.63211	6.75779	4.27504	14.5373	5.61129
Cav2	10.4926	11.8563	10.7613	11.4272	15.3693	7.92197	8.29973	7.83524	6.66673	10.4602	8.70883	9.09829	8.52218	10.9476	9.46616	6.47382	17.0057	6.46116	10.7925	8.20256	12.0942	13.9195	13.0269	8.09459	8.85532	14.1057	6.68735	22.6171	6.29895	7.52288
LOC100909799	9.76618	20.6504	9.06763	11.7	12.0742	8.73695	9.16158	10.5286	9.63085	7.45545	8.93576	12.5471	11.1341	11.352	7.22914	9.75466	7.4716	10.4534	10.312	20.0985	6.68342	8.76227	9.4124	7.58948	9.68701	10.4419	12.8734	7.87075	9.90246	10.7836
Dbndd2	11.0503	4.90241	12.2095	10.3176	7.85577	6.67673	5.63341	7.27412	8.35905	6.24022	9.23119	10.0224	6.06276	7.45919	8.21691	7.29952	6.94578	6.00331	22.6594	8.20256	14.227	10.8956	12.4123	5.83674	12.8212	9.43433	3.98589	9.88712	20.1542	11.6616
Crk	11.5608	7.72695	12.1089	15.7164	10.4783	8.00803	9.20647	7.6363	10.5539	9.54749	6.35394	9.83187	11.7728	12.1364	12.4246	8.59956	7.09252	21.6898	10.9322	8.61927	13.5511	10.6284	12.0384	8.19388	7.61216	14.3761	11.6345	6.28276	9.71345	8.5427
Phospho1	13.7088	10.2724	6.94756	19.973	11.8314	7.29429	5.10822	8.97788	7.01032	7.00423	6.0371	9.40792	7.40686	7.60535	8.58007	4.31296	6.82757	6.94039	7.128	7.15421	10.7119	11.4088	10.4654	14.8811	6.4084	13.748	8.22039	4.61255	6.4592	8.11739
Sar1a	6.38905	8.10029	13.2756	11.6527	9.15313	9.09129	6.27081	7.94236	3.85132	7.78362	10.5414	10.5083	8.38872	12.0195	8.18786	6.17956	7.00692	21.6898	9.45159	10.1984	9.29886	8.0752	11.0929	4.82653	12.1777	10.6774	4.88914	6.88421	7.39602	8.35977
RGD1564400	11.0463	6.75401	9.35326	7.21792	7.41403	9.17228	9.03589	7.37104	9.75906	7.69132	9.67648	10.9561	10.7719	9.05237	10.0133	9.26714	7.38193	4.85656	7.65649	10.7423	7.61374	12.1425	11.7505	19.0298	10.8908	24.5127	13.7393	13.4179	9.51622	8.28203
Nek9	8.0462	9.6502	10.6325	13.9993	12.0742	10.5947	10.1042	7.13129	8.73341	7.94257	9.66364	9.62228	9.99974	10.0219	8.97711	10.1236	7.92406	20.9324	8.27233	6.43923	9.09261	10.5436	7.65456	8.43132	9.84021	11.2444	11.8582	20.9339	9.28612	5.25458
Dag1	9.59339	8.16439	7.27341	11.569	10.2555	6.00855	8.71719	8.5851	9.21034	7.90155	7.86107	7.50728	23.2263	11.8538	9.86804	8.32286	6.55447	9.77731	5.83955	9.97466	9.52267	5.64925	4.80505	8.65581	5.89625	12.1865	21.0482	10.4193	8.45201	8.00306
LOC100360453	6.30266	10.5439	11.3808	14.3776	12.8144	8.55472	6.16308	7.09049	7.19494	5.80951	21.7036	6.58792	9.39918	6.59683	7.14683	9.61411	6.33843	5.76369	11.4563	6.71118	7.83316	5.70014	4.94688	4.30848	5.77806	10.8257	4.40437	3.85966	6.88241	23.9589
Tapt1	12.8723	9.03928	21.43	11.1579	10.6694	12.3512	11.3162	10.6357	12.1027	10.5063	6.67506	8.30755	8.71283	10.5384	11.2383	10.3827	9.58713	11.1081	9.70928	5.18472	8.35098	8.72835	9.0084	10.0891	19.0632	12.4003	14.1081	9.03038	6.80845	9.98782
Klhl7	8.84728	12.569	3.73326	4.78405	10.8484	6.59068	8.21894	5.88663	6.17441	6.06076	14.2878	9.04113	8.689	9.73446	4.35298	7.00965	5.71478	8.62628	6.21953	5.74179	4.78766	4.85615	23.243	6.36342	4.18472	4.71062	4.42509	4.61255	7.21934	7.82471
Srp9	3.60096	3.58253	6.94756	3.8709	7.54138	5.64409	5.88927	8.54429	5.718	6.39405	21.3482	4.93499	4.92837	6.64555	6.80304	7.9715	6.64822	4.19761	7.01008	6.03129	5.87597	4.83494	4.79646	20.9337	8.00612	5.38668	7.64861	5.62506	8.56295	8.11739
Spcs2	10.2845	3.95587	9.67911	8.78229	4.09503	6.7476	6.72418	10.8704	9.45137	8.17331	7.59133	7.31674	9.80908	8.09744	4.97276	6.20591	7.11698	2.58446	6.87031	5.18033	4.59019	7.44751	4.43973	22.8418	6.57911	13.9181	17.8495	9.49769	5.27172	4.71495
Dync1li2	8.66665	3.37889	6.94756	11.3508	8.27761	9.60761	8.92816	11.809	11.9283	7.19908	6.37963	7.30245	5.22388	11.2156	10.4636	9.22322	6.12647	19.0369	4.85246	7.32967	9.14088	4.60168	6.09012	6.64404	8.56641	12.1822	21.4708	4.4438	7.28508	5.85824
Anapc16	6.23983	6.06013	6.8148	6.59581	5.31279	6.9197	6.94862	10.5286	6.15903	6.72221	7.56992	5.07789	9.04647	6.59196	4.6435	8.03738	9.35887	9.58048	5.56438	5.87338	9.27692	6.2727	9.92815	7.28729	17.0103	2.38584	5.85454	7.47267	16.0329	6.21038
Mrpl43	10.2885	6.27508	24.1857	12.3985	12.0821	6.42363	8.78452	7.47817	7.75391	7.1478	7.80541	6.98806	7.6976	5.23751	24.9364	5.23967	6.68083	4.95498	5.01406	8.88684	9.69381	11.4978	7.11302	8.28454	9.19237	6.512	5.68466	7.27796	5.87162	5.14025
Dctn3l1	7.72027	8.04372	4.85967	8.67678	6.79321	9.13685	8.22343	20.9501	8.88213	8.40405	9.37249	8.89346	9.93777	20.3654	9.28216	9.04754	3.58702	8.43801	5.19313	9.49216	8.73277	11.061	10.7877	4.8697	4.74501	8.07348	4.51624	6.68517	7.30152	7.28507
Mrps30	8.97687	9.36737	9.61072	4.46391	12.8104	7.47652	7.02492	6.87114	6.79493	8.69632	15.9191	10.0367	9.62796	11.5518	7.02578	4.79608	7.96482	8.73754	8.82702	8.81665	9.19354	5.32692	10.4998	6.41523	10.9127	6.23721	8.12509	23.5041	7.63023	7.17532
Fyttd1	12.1223	10.3742	21.2731	13.5845	7.84383	6.29708	8.63639	6.85073	5.90774	7.56313	7.00475	10.4749	9.20853	12.419	10.5798	5.25285	6.93763	8.94292	8.20244	8.94825	7.20124	7.96069	9.05997	18.4513	7.53337	10.9958	10.4081	9.41115	4.8937	7.82471
Nr3c1	5.04605	14.1378	11.5297	10.856	10.7251	12.1892	22.4169	8.50348	6.05134	9.44494	5.77592	7.83596	9.08937	8.27283	6.58515	6.93499	6.47702	11.583	4.45937	5.45668	8.87319	8.88951	25.2545	8.63423	12.4447	4.56232	8.05051	4.00677	6.80434	6.28355
LOC498453	6.28302	4.22738	10.7774	5.83546	6.69372	6.34264	7.4738	6.01416	3.64619	7.85027	6.20408	6.75941	8.88918	4.98416	4.78876	9.07829	7.25964	11.5659	9.38608	9.5755	8.14473	10.1279	6.57579	18.7449	12.6767	6.54253	8.16238	21.1113	8.48488	8.04422
Chmp5	8.89833	9.29949	5.9177	8.68042	3.55778	5.73521	6.77355	6.89154	8.2052	23.0381	6.31112	6.33069	6.21528	7.20097	4.85171	9.79858	5.01775	9.16543	4.58166	7.45687	10.5364	8.04127	6.28783	3.86382	7.52023	5.39977	6.95253	6.63324	6.40578	19.5046
Smim10l1	12.9312	22.4606	9.78371	13.7592	14.7763	12.0475	9.09425	9.61041	6.70775	11.86	6.43957	11.1656	7.75003	11.0451	9.36447	9.61411	21.0656	5.65672	5.90506	5.35579	10.1809	8.4145	7.64596	7.3909	5.30969	8.17816	12.4963	12.704	5.58811	4.78812
Tmem258	14.4706	12.8745	9.86417	21.1044	15.3693	6.50462	6.12717	7.49857	6.06672	6.3838	6.32397	6.27353	5.91023	25.2765	5.57801	7.33905	6.90094	6.88905	9.69181	8.69822	6.78874	6.34056	5.78497	6.54043	6.0801	8.88475	13.4493	7.43373	6.26197	6.73172
LOC501718	7.07626	9.75956	11.409	11.1579	10.4863	13.9052	8.99101	10.4521	10.1796	11.578	8.7174	11.4419	12.3066	8.76979	10.604	8.19989	8.19716	8.60061	10.3251	9.37811	23.4073	9.66989	11.196	7.55495	8.24687	6.04093	13.6647	12.3881	15.9631	9.89179
Dynlt3	5.4034	8.86581	12.5957	5.88639	11.7916	5.77064	5.37306	5.64688	5.77954	6.2351	4.95813	6.94042	8.6318	8.94518	5.79106	7.21607	7.35339	19.7643	5.34163	5.72863	10.9313	9.52993	6.24485	6.92897	8.56641	5.94062	5.58522	11.778	15.959	8.29117
Mrps17	23.2511	11.0493	8.95097	10.2448	7.48169	7.48664	7.37505	6.41714	5.69236	5.37367	9.56944	7.13573	20.9909	8.68209	8.42512	5.45049	4.85878	5.22883	5.15819	8.75086	8.1184	5.83162	6.21906	6.27277	8.17683	13.7873	8.72173	6.78036	6.08529	10.1342
Rassf3	9.84471	13.1535	24.1978	10.9069	14.1356	7.86629	7.58153	7.06498	5.80005	7.1478	9.79637	9.69373	10.4764	6.05115	9.47584	8.12961	9.68088	5.06195	5.31106	5.01365	11.7168	8.41026	9.92815	21.0502	7.27073	10.4288	6.55477	11.1246	6.16335	10.436
Twf2	8.91797	4.73271	6.94756	18.2376	10.8803	6.68179	7.30772	6.54467	5.96416	6.19408	4.72264	9.97477	22.2587	10.704	5.59254	8.21745	4.94846	9.51202	5.94	8.25519	7.86827	7.31179	9.19751	6.50589	8.90784	7.36253	8.31154	12.678	6.03598	8.69819
Polr3d	7.26867	21.0464	7.43031	3.90364	9.30833	5.82632	7.78353	7.30983	6.1898	5.89155	7.97239	7.9217	7.21144	9.84165	8.83185	6.91742	4.45932	5.21171	4.94418	8.27713	8.16229	8.02431	6.60587	4.74019	10.0722	6.65157	7.342	3.84235	14.5373	7.02898
Mapk14	8.90226	10.4798	11.8394	8.05467	8.59996	7.3196	8.59599	9.03909	8.04622	7.28624	9.80921	10.4845	10.3095	9.65651	8.75438	9.02998	9.64012	8.62628	19.3924	9.33425	5.22211	10.4587	12.5327	10.9655	11.6174	11.5977	8.11266	6.87988	10.6379	25.0061
Col4a3bp	11.4115	9.77842	6.674	20.9189	14.3067	5.99337	6.55809	10.3654	7.44109	6.04538	7.0861	6.56887	5.11903	6.83556	4.58055	6.51775	21.0656	10.0726	5.40278	8.10167	7.74539	7.0658	7.05715	7.17504	9.22301	5.26019	7.91793	4.58659	7.76172	7.49087
Tax1bp1	7.6378	7.3687	12.1532	12.4058	11.8911	9.16216	9.13465	7.95257	8.18469	10.3884	5.27497	6.68796	8.38872	10.592	10.7106	8.16914	9.79094	5.71663	8.91874	9.03597	12.0416	13.4912	11.5828	22.5181	13.1582	5.66583	13.1758	21.3925	8.80127	7.2805
Fbxo31	15.3463	11.8412	15.4158	11.3871	14.5296	13.9052	11.0469	10.0032	12.2924	9.76285	6.65365	9.39839	9.40871	9.53471	7.77629	18.9252	7.28818	10.3507	9.61756	10.6282	10.7733	10.0728	9.08576	6.51884	9.49878	6.12817	12.0861	9.29	15.9261	9.76374
Msrb1	5.81572	22.4002	9.84405	7.82548	13.1248	5.94781	9.18402	9.085	8.75392	7.51186	7.25308	5.30178	8.48405	9.49086	5.24391	10.4222	8.20124	18.0912	9.35114	9.6413	12.3093	9.41117	13.2031	8.53493	10.6807	7.32763	10.636	10.2549	6.61122	8.26373
Popdc2	13.4457	22.4002	10.4958	13.5882	7.88761	13.2623	9.51619	8.126	13.9078	11.255	7.80969	10.8608	8.04554	12.5164	11.3158	5.51197	7.39008	11.1551	8.36405	19.4493	8.31149	6.98098	8.69035	8.28886	7.9317	7.30146	13.1012	12.704	9.48335	12.1509
S100a10	8.94153	22.4002	12.8572	13.7592	7.88761	6.98045	5.75909	9.21253	9.20008	10.25	6.28543	9.30312	9.38011	9.39342	12.0421	9.05633	4.65498	5.1946	7.89234	8.86052	21.7442	12.961	10.315	8.00824	11.6349	12.771	14.1454	13.0328	8.62048	8.48782
Klhl9	10.1235	11.6526	7.42226	3.39795	11.5329	5.96299	8.51071	9.40637	8.30777	9.0655	5.93862	7.16907	6.75387	6.26553	2.65343	7.93197	16.0397	8.38239	6.56021	4.37762	4.51998	9.48752	7.78779	8.88894	6.09761	11.9467	9.5214	11.2934	15.4084	8.25916
Ppib	12.9312	22.4606	14.7158	9.86643	14.8758	13.2522	12.0479	8.07499	11.3078	11.5472	8.47334	10.8608	8.1933	11.1181	11.0931	6.79444	9.50561	8.38239	9.12402	11.0406	8.44753	11.3621	23.3763	10.3006	10.1948	12.7448	13.2918	12.4573	11.1146	12.2515
Rbm3	5.52906	11.7054	3.86601	18.2376	12.6273	5.61878	7.33465	8.80955	9.08726	6.69658	8.49047	5.81147	7.812	7.95615	7.17588	6.5968	5.09112	6.6751	20.2921	8.07974	7.39433	8.2194	5.09301	7.03689	8.09366	11.9423	13.5363	7.30392	6.62355	5.15397
Mtfr1	8.24647	12.5351	6.75446	21.5664	10.8803	8.13458	8.47929	9.80425	12.5847	7.76311	9.80921	9.37934	10.1094	10.514	10.1586	9.60972	9.39555	9.23389	8.57806	6.61468	21.7442	10.9041	9.45968	10.4042	5.49791	13.9661	10.3003	13.0198	7.34261	8.99544
Ifitm3	15.1421	21.5706	12.7566	9.63359	15.7474	12.169	9.85734	8.98808	7.87699	11.055	7.40294	11.3562	10.3429	11.922	10.9188	9.3989	7.89552	8.5835	9.23758	10.8388	14.3147	25.2223	8.72903	7.55926	10.2035	12.1298	9.15264	7.60248	10.5681	11.9086
Rab5b	9.46773	9.17504	3.6528	8.78229	10.16	9.73922	7.9137	8.47798	10.7129	7.47084	9.44099	9.16974	23.3121	5.41291	8.69143	10.0401	8.20124	5.97336	10.1286	10.4966	14.3147	11.7438	8.96972	4.68838	11.4598	6.65593	8.24939	10.3761	8.15617	21.2058
Nrdc	15.3463	7.78351	12.0687	11.5399	6.90862	11.6172	10.1132	12.6711	9.93342	14.0238	8.32777	11.1561	9.40871	12.1218	10.5072	20.1154	8.19308	10.6545	10.0805	9.29916	10.0537	7.64684	7.09583	6.69584	12.5104	12.2302	10.2631	12.6001	16.2302	11.3415
Zc3h15	12.7388	8.54904	11.0469	9.44805	7.70852	8.69645	9.37704	8.86056	9.70778	7.94257	9.79637	9.64133	8.66993	9.71985	9.09332	11.0723	7.87107	5.52407	9.84905	10.2466	10.4618	9.88195	12.4166	7.18799	20.731	9.73528	6.71636	8.19095	21.3334	7.2119
Ncoa4	12.7388	3.5335	14.7279	12.7732	15.7474	5.95793	6.28877	23.4955	6.05646	7.96308	8.38343	7.82167	6.32014	7.46894	8.05713	5.28359	7.05991	7.89459	8.86196	7.50073	11.1858	4.1818	9.56712	9.93799	5.65112	8.70156	23.8242	8.26451	7.52751	8.03965
Tmem182	22.5207	11.6677	5.92976	10.9942	8.56812	9.86071	8.73963	7.41185	5.87697	6.18382	8.34918	7.04522	21.8583	10.1681	7.12262	6.79883	7.45937	4.86084	8.32037	8.06658	5.41958	8.73683	9.98402	7.33046	8.75026	10.9391	9.25623	7.29959	5.90449	9.44819
LOC102556889	6.08275	6.73892	6.44872	5.89003	6.00127	8.80276	16.7925	8.04949	7.81033	9.78336	7.90389	9.84616	7.35443	10.2558	4.96307	10.2685	5.34792	4.94642	9.45159	5.37772	9.32519	25.3241	13.4782	5.4482	7.30575	6.86093	4.51624	8.57605	8.87934	6.25154
Rpn1	14.0033	21.5706	15.0738	9.34983	11.7876	5.39099	5.57056	9.65122	9.3847	5.85566	10.353	8.56478	7.3449	6.89403	7.25819	8.03738	5.14819	7.84752	6.41608	22.4101	8.53529	6.03096	6.60157	8.71193	7.27073	10.9696	13.2918	5.88468	9.79562	10.4177
LOC100910983	22.882	5.7245	13.4969	7.11969	14.442	6.08954	5.83989	9.72774	6.68211	5.59415	6.93196	9.76994	8.65087	11.5859	10.3813	7.19411	7.40638	4.76243	7.02755	5.14524	5.68288	3.84675	6.47693	22.8418	6.78922	10.6687	10.002	7.91835	4.68004	4.98934
Heca	7.39433	7.82123	13.0946	11.2962	10.8644	12.4575	9.98751	10.4623	11.9181	14.0238	10.1004	9.07447	10.6956	10.2753	9.15627	7.15898	8.01781	21.5914	8.77461	10.8739	9.75086	10.0346	10.6158	9.0573	6.76734	13.9836	13.8222	24.5166	9.42171	10.9299
LOC102550325	10.1471	14.5074	9.78371	13.9047	24.0926	8.24088	9.66881	10.498	9.56932	11.86	9.66364	8.00745	6.7777	8.47259	7.20977	4.94101	4.50416	19.944	6.14091	10.4659	9.29447	12.1425	7.45256	7.27865	11.2497	10.4375	7.58232	6.71545	5.8634	5.42836
Phkg1	10.7675	13.1535	13.69	9.51354	9.67048	12.2601	8.79799	6.87624	24.1284	9.74234	6.26402	11.3514	10.8052	13.4714	12.4246	7.23364	7.32894	7.87748	9.57825	9.99659	12.6866	12.486	14.8836	4.72292	23.3968	6.30264	7.23842	11.7088	6.94815	7.41312
Speg	5.23454	5.55858	4.73094	5.47893	6.07688	6.9197	5.78602	9.62572	7.30263	5.90693	4.637	6.34499	9.87104	7.89281	6.04285	19.3644	7.08844	5.40426	3.85227	6.95682	4.70428	8.054	4.38816	5.35322	6.89866	8.33082	7.41658	4.47841	19.8172	8.11739
Ap1s2	11.5097	6.72761	10.9866	7.05785	20.2961	6.76278	7.41096	7.1772	7.18981	6.7017	5.99428	9.96525	9.30862	7.25943	7.00641	8.09009	7.4716	21.6898	4.55546	6.07516	10.0668	10.4545	9.07716	6.08281	6.39526	8.30901	4.57011	8.15633	6.51261	5.44208
Tmem64	12.7428	7.09341	9.98485	8.06923	11.9667	13.9052	9.88876	8.17191	11.9898	10.3012	8.47334	7.38819	8.05031	9.5542	9.6792	8.11205	5.24194	17.8259	9.62193	8.36924	9.56216	7.78256	11.0198	8.28886	9.17486	14.3063	22.7925	12.0203	8.65335	10.6784
Zmynd11	9.51093	11.2341	9.88428	13.5263	12.297	7.72962	5.43141	7.84544	6.97442	8.33739	8.60179	11.4562	11.6679	11.2351	8.73985	10.4047	9.43631	11.168	7.14547	9.63252	9.15843	14.3734	26.1398	9.92936	9.93214	10.058	11.4563	11.0035	8.64102	11.3552
Lrrfip1	10.9128	7.24048	10.9061	9.45533	20.6343	11.5008	11.4509	9.29415	11.3693	14.0238	8.80303	9.28883	12.3591	12.2095	10.8994	8.87626	14.8454	10.4405	8.49071	7.94376	9.1321	9.72078	5.38097	8.13344	11.3854	12.5137	11.7588	9.74433	8.59993	10.1982
Prkcq	4.26068	2.42103	3.69303	3.68172	5.39637	9.3697	6.12268	5.49385	5.99492	26.9453	5.81445	9.28407	8.46975	9.35931	5.30686	4.24268	4.86286	18.5448	5.28049	5.1584	8.10085	5.10638	7.51273	5.21507	10.6544	6.13253	3.86574	4.58659	5.57578	6.50763
Mrps16	9.61695	14.6205	12.1089	21.9412	9.31629	8.42817	8.53315	9.25844	8.23597	7.1478	8.23785	10.9227	11.3629	11.2058	5.66033	5.19136	8.80858	20.5217	7.32018	10.716	9.29447	12.1425	11.2605	10.3136	11.6743	14.1101	6.60449	8.39432	9.42993	7.53203
Frat2	7.49251	10.3931	3.33901	7.17063	3.81248	6.06929	7.11919	9.22783	5.47697	6.03	5.93862	5.91151	21.1386	4.75517	5.946	5.23089	21.0656	4.77526	6.88341	5.91725	7.46454	5.55594	3.35666	6.90738	5.10833	4.51871	6.98153	4.11927	8.31231	7.56861
LOC683897	4.90469	4.60826	3.64475	3.92547	6.94842	6.83365	6.12717	7.01397	7.05647	6.76323	8.4134	7.01188	5.08089	5.57369	4.83718	19.9793	5.92266	11.0909	8.01027	6.79891	7.22318	5.68318	6.02136	5.64678	9.53818	4.34424	4.80213	3.74715	18.1449	6.95581
Ubxn4	9.12609	11.7054	11.9883	17.9757	13.284	9.90626	10.1671	10.6459	8.82059	12.2959	8.8801	10.4797	10.1141	9.03775	9.93099	5.61738	9.52599	20.6415	8.97989	8.54908	10.058	8.98282	7.72333	10.5683	9.65199	11.5236	12.5792	11.3929	6.02776	7.86129
Pkig	8.34464	4.12179	6.71423	9.41167	3.85227	9.63292	5.73665	11.2479	10.8309	6.13767	5.34775	5.56377	8.42208	8.60414	5.04539	10.3608	8.01373	7.25703	10.1111	5.41281	5.38886	4.96642	11.08	4.17897	23.3968	5.24275	6.26888	7.20873	21.3334	6.29269
Ubr5	7.76346	5.32854	13.0946	8.85141	14.442	10.9187	8.97305	10.4368	10.1232	6.86066	6.94908	10.1272	9.87104	11.9123	5.24391	9.83811	6.02049	9.5163	8.59117	22.0592	8.69327	8.99554	9.50266	8.79828	10.0591	14.3369	23.7123	13.7381	9.06835	9.66313
Plec	12.9312	4.3556	7.88087	18.2376	12.0543	5.48211	7.81046	7.21291	7.82571	9.01935	5.38629	10.2892	9.36581	8.46772	7.28725	10.2685	8.46619	6.48683	6.90525	6.2857	8.3071	5.03852	5.23914	5.86264	8.26438	10.7472	8.3364	13.4179	5.48949	15.7134
Sumo1	7.04484	9.74448	3.33499	11.2416	12.6632	7.28923	8.07978	7.75362	5.42056	3.43033	7.2488	8.50762	7.20191	4.77466	8.2266	5.09034	20.4827	8.63056	4.56856	8.11483	9.49195	12.0704	13.4567	6.67857	5.02954	10.8126	19.6353	5.22265	8.19726	6.73172
Wnk2	5.21098	3.42791	10.4234	5.0751	4.54871	9.09129	6.7556	10.1511	9.84111	6.14793	6.64081	6.80705	5.76248	7.77101	5.86853	20.1462	8.97978	5.77225	7.68706	8.39995	6.95111	6.59503	9.70036	8.17229	11.044	11.48	9.19407	12.1934	19.8172	5.06251
Emc7	14.8868	9.42394	11.9118	14.5086	15.3693	11.5008	10.0324	8.79424	5.86672	12.424	9.60369	10.4988	7.94069	12.0195	11.4708	9.35498	7.26372	6.58952	6.10161	10.0448	12.1249	7.75287	8.01988	7.6931	24.7975	24.2902	9.13192	7.60248	7.91786	10.1936
Dusp27	8.05405	4.31412	11.3808	10.9397	11.334	8.65596	8.05734	12.2783	10.1642	9.14242	5.30494	9.93667	9.38488	11.0694	9.2289	9.8425	7.92406	21.0009	10.3339	8.11483	6.58688	10.2552	9.51125	5.28846	9.39373	11.7198	8.76317	25.0229	8.50132	8.968
Tspan3	7.51999	12.8745	14.0158	11.1579	15.4966	6.56537	6.15859	7.12109	9.21034	19.2488	4.14462	7.67877	9.34675	6.8112	5.99927	8.77085	7.89552	7.62502	11.0895	6.36466	5.5249	7.31603	10.3837	8.91484	8.29502	14.1101	21.2263	8.80971	6.15514	9.76374
Eapp	12.5229	6.98027	5.43092	6.45756	8.97006	10.6048	8.03939	8.03418	7.25647	9.68081	5.00094	11.5324	9.91394	11.581	10.2409	9.65803	5.07482	12.5586	6.71308	8.74647	12.5945	14.437	14.8836	8.88894	23.3968	12.1822	7.77291	7.61546	15.8768	6.65398
Capn2	4.48058	4.59318	7.61536	5.12967	4.42534	6.85896	8.01245	10.3399	10.6001	8.804	5.51046	4.91593	7.83106	7.62484	7.14198	6.75491	9.78279	20.5045	8.28543	7.97885	4.76133	4.04184	5.08442	20.9121	5.00765	4.97668	7.61961	6.84094	4.35133	7.0244
Rhoa	11.0463	7.69301	10.717	3.43433	6.053	7.21836	8.48826	7.69751	19.5232	10.655	4.14034	7.15954	9.44208	11.8197	11.2093	6.71099	8.98386	18.763	5.59496	7.85165	11.9055	11.7057	9.88947	6.76923	9.77455	5.50445	10.1968	10.627	7.07142	4.51373
Arl1	12.1773	7.20654	9.21246	8.29479	7.00015	7.20317	6.97106	9.5696	7.28724	8.21433	9.06849	11.1514	9.18946	10.3094	9.8051	9.20126	21.0656	11.8226	9.77917	21.3223	10.7031	7.83346	10.6975	7.28729	5.11271	11.4058	9.52969	10.8001	7.42068	11.2546
Eepd1	9.91932	6.80303	8.92281	8.71316	10.0724	19.4379	8.51968	7.99337	8.56418	6.45558	8.32777	9.63657	9.37058	9.37393	9.7131	10.8702	7.14143	20.3291	7.02755	9.66323	9.03117	8.81317	9.07716	8.427	9.68701	7.6504	4.88086	8.65826	8.92043	10.2073
Stag2	8.05012	3.73337	3.63268	9.29162	6.54648	6.03892	8.66332	7.97297	8.95393	18.9565	5.27925	7.56444	6.88256	21.257	5.38433	7.33027	5.66179	10.1667	7.63465	6.4787	6.51227	8.99978	6.46404	9.41131	7.37578	6.64721	5.21647	6.29141	7.55216	5.89025
Celf1	8.42318	8.44722	5.47518	9.84096	10.745	7.72962	17.2952	9.99809	10.0565	6.69145	5.90865	10.1606	8.08368	10.7576	9.12721	8.93335	4.94846	19.4862	6.57331	9.44391	10.3038	6.74771	12.1888	7.55063	12.1471	14.3674	11.245	5.65535	7.48642	5.34147
Ubap2	13.1276	20.6504	8.85039	9.51354	10.5898	6.65142	6.58502	9.47779	7.63596	6.45558	9.49237	10.9132	5.83874	7.84409	7.26788	5.71401	7.14959	8.16416	8.47761	10.6282	7.66202	7.22273	10.3193	22.7814	9.47252	14.2583	13.4493	13.7381	3.96098	5.95885
Pfkfb1	12.6014	12.4521	11.067	9.63359	24.4508	12.0272	7.42891	8.94217	12.7847	9.40392	8.91863	11.4419	10.3381	9.53471	12.2891	5.06399	20.5887	8.84879	10.3775	9.46145	10.2424	7.99462	11.3593	10.0502	10.7113	9.86177	12.0696	13.6602	9.49157	8.89483
Stx4	9.12609	8.82433	9.22855	10.4958	10.6853	9.22796	8.18303	6.6926	6.98468	9.35777	8.84585	9.86521	10.0855	11.9415	11.6451	9.64486	6.55854	17.4665	10.5173	4.7066	8.93902	7.62564	9.79491	10.5079	9.28429	10.3067	5.90426	23.9627	9.43404	8.92227
Canx	7.0684	4.01243	4.69071	3.68172	4.06319	5.67446	6.34712	5.22349	6.6257	8.81938	7.04328	5.47326	10.4764	7.7369	7.86345	6.39916	6.04902	6.85054	2.8215	8.28151	16.4079	4.24966	4.54718	14.8811	4.49113	7.51082	6.86137	11.2718	7.10018	10.2119
Slc25a51	14.8436	4.38577	13.2313	21.2026	8.5721	7.45627	7.94063	6.1876	8.0052	6.02487	10.323	4.57773	6.37257	9.2911	8.61396	5.67887	6.38734	5.54119	15.016	8.97018	5.47224	6.56959	5.66033	3.88972	4.9026	10.2063	9.66642	13.141	5.18954	5.3369
Fnip1	14.0033	8.92238	13.5009	11.0415	7.29066	6.69698	8.38502	8.91667	6.4616	9.27573	6.79923	25.7896	8.11704	11.8197	12.5166	7.93636	5.32754	11.6985	6.38987	6.04007	11.9055	12.2782	11.1316	7.77944	14.3445	25.0971	13.6855	13.9761	8.61637	7.87959
LOC100910833	18.6724	9.96697	10.721	8.80412	10.5739	13.0194	8.78003	10.9418	11.9283	10.9935	6.46526	8.69816	8.93685	10.6309	6.44473	10.8878	7.61019	18.1768	10.6571	7.87796	10.4705	9.7844	10.2548	7.03258	10.0328	10.0799	6.67078	10.2376	8.90399	8.86739
Rb1cc1	14.4706	9.80481	15.3876	20.8716	14.9037	8.76226	9.70921	10.5184	10.4975	11.4908	5.20646	11.1752	10.8243	10.5725	9.24826	9.60094	8.75152	6.72645	9.83158	8.94825	10.2467	23.7421	13.5126	9.21704	8.86407	8.9938	13.0308	8.96548	8.62048	6.17836
Sugt1	4.02506	4.42725	7.64352	4.23835	4.09503	5.67446	7.50073	3.44322	8.96931	7.79387	6.2469	9.56988	5.83397	6.57247	5.90243	5.41535	5.63325	14.6595	4.25409	17.7035	5.95935	3.63469	4.80075	4.42072	6.61851	7.20987	5.27447	7.44671	4.20752	6.28812
Mfn1	14.4942	5.78484	15.0738	9.04423	14.9037	9.20771	8.74412	6.46815	5.48723	10.5063	8.4134	10.7179	11.2008	7.61997	10.5798	8.28773	20.5887	8.90441	8.86196	8.17185	8.80737	9.05067	6.9626	5.71154	7.53337	8.69284	12.1731	23.2358	6.08529	9.31557
Asnsd1	11.5293	10.8079	8.06593	14.4977	3.37074	9.54686	7.42891	5.08577	5.73338	9.71157	6.73928	6.27353	6.10089	23.9756	7.50029	9.33302	8.16047	8.35671	8.4383	6.03568	6.36307	7.98614	7.94682	8.66445	6.41715	9.15518	9.25623	9.6102	5.91682	11.9634
Rad21	3.45566	7.48183	2.82408	10.0774	9.96895	11.5008	5.50772	12.2579	12.1027	9.70645	7.63843	5.98296	5.34304	6.08039	6.17842	5.95996	15.306	5.04912	12.0678	7.8034	4.86226	9.56386	9.99262	4.62363	9.09169	10.9478	6.53819	3.86831	6.74271	6.0869
Lmod3	14.4195	5.19655	9.20843	5.94824	6.47086	6.62611	7.00697	3.91252	5.88723	6.54788	5.71169	5.69715	6.61088	8.00487	6.16874	8.20867	5.71885	7.79618	8.65231	4.83381	4.31811	4.83918	7.71473	7.39953	14.0556	7.32763	4.08948	8.43326	8.70266	3.52135
Hexim1	7.79095	11.5961	12.1089	20.0712	7.28669	11.1768	7.70722	8.31984	11.5181	12.2087	5.99856	10.9275	8.24096	11.7515	11.4998	10.2905	7.85069	21.5914	10.561	8.49206	8.54846	11.9177	12.7304	7.91759	8.65834	11.3796	13.3084	12.1415	7.22756	6.84148
Mrpl4	9.77403	8.38312	5.22173	8.4294	4.71585	6.28696	21.573	6.74361	6.5898	7.30675	4.95813	20.5259	7.00649	11.1425	10.1198	6.2103	4.71612	4.53992	5.73909	6.86471	12.0679	10.2891	7.43107	5.43525	13.631	6.40295	5.0383	6.80632	8.13563	4.95733
Trappc6b	5.89426	13.7833	8.65327	14.3776	11.7677	11.4704	5.80398	6.82013	10.236	11.014	6.34537	8.35518	7.89779	10.8258	9.48068	8.56003	6.95801	17.4665	9.18953	10.3343	10.2029	7.27786	10.6029	9.77394	8.46574	11.3666	11.1622	22.4873	9.95587	7.10215
Malsu1	8.8355	10.593	12.6158	8.78956	17.9521	6.59068	8.81594	7.1466	7.07699	6.28637	19.3915	11.6706	6.8921	10.2704	11.0398	4.92784	7.42676	4.93358	8.019	9.82114	6.44206	7.25666	6.17608	8.27159	9.90587	5.40849	4.97201	4.56928	4.0144	5.43294
Mettl22	20.7143	8.56036	7.68777	4.18377	11.6046	6.59068	9.46233	7.30473	5.19492	5.78387	9.15412	7.31674	9.38011	10.8745	9.75668	5.16501	7.74471	5.44277	6.31562	6.82523	5.7882	6.9216	6.52851	4.65816	6.73669	4.07818	3.80773	9.63616	13.7607	4.81098
Mrps7	6.75032	11.5923	7.61536	14.1412	12.6632	6.21103	8.86981	6.07537	6.97442	5.74798	5.75451	6.32593	9.18946	6.29963	10.0569	5.53393	11.1605	6.8377	6.70434	21.0986	9.18915	5.28875	8.13592	6.32025	8.61019	10.6905	5.75924	10.9645	4.7088	5.1997
Ddx23	9.90754	12.7953	10.0975	10.3467	9.65456	13.9052	9.45335	7.6159	11.9078	10.3884	8.08372	10.5321	12.1541	11.2351	9.10785	9.91277	14.8454	10.4876	10.1723	6.88225	7.72345	8.44419	11.6731	8.92779	12.0595	11.9641	24.2758	8.33374	9.51622	9.65855
Arl8b	8.49386	4.33297	9.46188	19.973	9.58293	9.23808	8.3132	5.50915	6.51801	9.72183	6.52948	9.97001	5.0523	10.5725	5.43275	7.44446	4.91177	7.08588	4.32834	6.52257	8.67133	11.1543	18.6142	9.35518	10.418	8.06912	6.85309	6.50343	6.97692	6.62654
LOC102556682	13.587	12.9235	22.3714	14.1848	13.3039	9.91133	6.89475	6.83033	5.81544	10.2961	7.26164	8.41711	8.05508	6.75274	7.87313	21.9381	7.21073	12.5586	5.08831	8.23326	11.357	10.6114	12.3865	5.05966	9.23177	5.45211	12.0737	10.4366	9.43404	6.11891
Ergic2	6.16129	6.59939	4.32865	3.32519	5.98535	6.79822	9.02692	7.23842	19.0361	8.0041	9.40674	11.4658	9.67563	8.27283	5.69422	5.75793	4.69166	8.57066	8.8969	6.21991	18.4485	9.14822	8.87516	5.91444	4.41672	5.56115	5.96227	4.56495	5.6785	7.29422
Lamc1	9.9743	9.43902	12.5957	5.50075	13.674	6.87921	7.08777	6.64669	7.16929	7.86566	7.93814	6.66414	5.01417	7.01096	9.49037	10.0665	6.72567	8.2583	9.98008	9.77289	5.99445	25.3241	12.249	6.15189	8.02363	7.63295	10.3294	12.1112	20.1542	6.86891
Rab11a	8.74126	7.8891	7.65961	6.68676	20.4115	7.92197	8.52866	7.93216	8.09751	9.69106	10.0276	10.3082	5.66239	10.8697	12.5602	6.53971	8.43765	9.87145	8.84012	10.9879	11.2648	21.2398	9.89376	9.9639	8.80717	11.8987	11.6304	12.1934	7.18647	8.16312
Plekhb2	23.3532	11.7054	8.26305	13.2498	13.5904	5.99337	6.13615	10.9418	8.26161	7.00936	6.43957	12.5852	10.4239	11.5274	9.05458	7.28635	7.11698	5.84071	7.02318	7.96569	6.45084	5.70863	8.36371	22.8418	6.77171	10.5684	6.52991	11.7088	5.34568	4.57775
Rcsd1	9.36956	14.1566	5.51138	5.11148	8.03087	9.16216	8.31769	5.81012	7.55904	7.08114	6.94908	9.44126	10.1618	10.5822	8.55586	10.4442	5.25417	5.81932	10.8623	22.4101	11.9845	9.64868	9.79921	4.80926	11.5649	8.19561	11.9121	9.54096	6.70162	4.25763
Pccb	20.8596	5.83386	9.99692	7.71997	7.84383	6.23128	9.03589	7.32003	9.62573	7.27086	5.62606	9.92238	8.29816	4.81364	9.59205	11.2831	4.924	11.6985	10.1286	4.83381	7.28462	22.5037	9.2061	4.8697	7.39329	5.43466	6.96496	4.75101	7.51518	5.79422
Oat	10.2885	8.04372	14.398	13.8829	24.4508	7.09687	7.28976	9.91648	5.53338	8.55788	5.17221	9.53653	10.4668	13.3349	10.7009	10.2685	21.0656	8.177	10.5697	6.1892	6.18754	7.79529	7.19898	7.42975	10.1816	6.8871	10.7603	7.00969	6.51261	7.52288
Elavl1	23.3454	10.2724	6.46481	13.319	9.66252	12.3968	9.39051	9.84506	12.8309	12.9419	9.8349	9.31741	9.36105	9.93422	12.2891	7.93197	4.46747	21.6684	11.6485	8.62365	6.98183	9.5893	12.9066	6.16052	7.16567	14.2583	4.86428	8.80105	8.24657	4.79269
Aimp2	7.26867	9.77087	11.7227	9.86279	12.8104	7.72962	17.9281	9.62572	8.83598	8.5066	7.91673	10.0462	8.08844	10.3532	5.74264	9.57019	8.84934	9.23389	9.45159	10.4966	12.0372	10.4375	8.87946	10.1323	22.7446	6.84785	11.6925	10.9256	7.33439	9.05032
Thap4	6.99772	4.50267	4.4252	4.34385	4.4333	6.57549	7.33465	7.56999	9.16931	7.66568	10.5457	5.36847	8.13134	5.91473	6.82241	8.99045	10.0437	4.62978	8.00153	8.17185	6.13927	4.97914	4.73629	22.8418	4.62245	7.45848	6.13215	21.6219	7.74939	13.1662
Luc7l2	4.32743	12.3692	6.28378	12.2275	9.32425	7.37528	20.7067	6.94766	8.10776	9.7731	5.49333	9.64609	7.77386	8.59926	8.36217	8.12961	6.13462	11.1637	5.55128	6.49625	25.7288	10.1491	14.8836	7.29592	8.74151	8.76263	6.3186	4.67745	6.63999	4.8247
Ywhah	3.62845	5.91683	4.83956	4.91866	8.54822	6.48944	5.26084	8.52899	8.11289	6.7376	19.3915	7.97887	6.44406	21.6711	4.93402	9.02998	6.54631	5.20743	3.20149	3.95214	9.93078	7.54082	7.95111	4.33438	4.18909	5.13807	5.45264	8.59768	6.00722	9.51679
Igf2	14.769	11.3811	13.1428	18.2376	11.334	11.03	9.39948	6.34063	5.98467	11.2242	6.82492	9.53653	10.9816	8.95493	10.5217	9.64486	7.07622	17.4622	8.93184	4.34253	6.61759	6.67137	7.76201	6.28572	5.40161	13.6346	8.10852	12.7862	9.70934	9.19666
Fam114a2	9.22426	6.53906	10.2866	5.88275	8.02689	18.5521	7.41994	7.1517	8.17443	8.60915	8.1565	8.10748	4.31828	9.09622	8.55586	8.87626	16.056	11.4889	9.47343	7.17176	13.2132	12.2909	14.8836	7.62834	6.29021	9.52156	6.22744	4.52168	7.55216	6.69056
Mat2a	5.04998	10.6118	7.27341	3.19786	5.00636	10.0126	9.75858	7.95257	11.8668	6.56326	8.35774	6.0687	6.44883	7.98538	2.50817	7.70798	7.86291	6.58524	4.56419	6.71557	5.43714	5.22937	10.676	17.5447	7.87042	6.00604	6.31445	10.679	6.02776	8.95886
Mcts2	8.24254	21.9552	9.35326	7.90915	12.102	9.78984	8.42991	6.92725	7.73853	5.92232	6.82492	21.7216	9.98544	9.71985	7.86345	9.84689	7.42676	10.8642	9.54768	10.2993	10.1809	9.67837	11.0886	5.26256	14.3445	11.8681	8.12095	6.0491	7.60147	9.18294
Mmgt1	10.634	5.67925	6.29987	9.84096	9.0417	6.34264	8.07081	7.50877	7.72315	4.43533	5.79733	10.2892	11.034	10.6943	6.53189	7.65088	9.88877	10.3764	15.1121	5.46983	6.7668	9.08036	23.849	10.0589	9.00852	9.29039	13.4493	13.4179	6.66875	7.01983
Cmss1	12.9902	7.02553	12.5837	18.867	14.442	3.95846	7.2359	6.24881	5.78979	9.39879	5.39913	9.73184	6.93976	9.47624	10.5508	8.21745	6.5993	8.07003	6.75675	7.72883	9.79035	7.87587	4.9168	6.9117	16.5244	11.0569	4.6074	10.1943	8.76429	5.03964
Hsbp1	11.8003	8.10783	10.9825	7.44712	7.66873	5.73014	7.88677	9.21253	8.32828	7.81951	9.39818	11.3276	10.7004	10.2558	5.946	9.31106	21.0656	8.41234	7.34202	10.4659	8.7196	13.1434	8.42818	6.85558	24.3773	6.32008	11.0213	9.60587	9.74632	11.8034
Psma4	10.1589	8.62447	5.95792	11.4745	6.80515	7.35503	7.72068	5.61628	7.29237	10.25	8.21216	8.95538	9.43254	8.94031	6.08158	8.25698	5.31531	9.13975	6.27631	11.08	20.6778	9.73775	7.50413	13.0981	8.37381	10.9566	7.23013	3.98081	7.30152	4.57775
Zfp330	11.3134	10.412	8.5527	8.00738	11.4494	8.05358	6.46832	7.68221	9.70265	26.4479	8.97858	9.06495	9.95207	10.2704	10.8026	8.73571	7.52867	5.41282	6.28068	7.0621	7.47332	19.327	9.72185	8.40542	10.1116	11.9074	12.5916	8.89625	8.34107	6.5808
Ppp4r2	4.94788	7.87779	14.0158	11.1579	15.4966	12.4626	8.8743	7.08028	9.00521	11.9215	5.90008	8.90299	8.51741	10.894	8.94806	7.45764	6.44849	10.0683	9.42539	7.87358	10.3126	12.486	10.3107	22.5181	4.53053	14.1755	22.0799	11.7261	10.1449	11.5473
Mreg	12.9784	8.68857	9.3613	21.5664	11.3658	8.43829	9.6329	10.2429	10.6001	6.21459	7.87392	11.5658	11.1151	9.67113	6.76915	9.43843	6.74605	10.509	9.76606	7.94376	25.4435	10.1703	14.8836	7.74922	12.6767	14.1537	13.2918	6.19622	8.39038	5.83995
Alkbh5	9.91932	12.339	13.8388	20.8716	12.0264	12.5689	8.29525	8.38106	12.4616	11.3062	7.9938	7.34532	10.6575	11.0451	10.6137	8.82794	7.68764	5.661	8.82702	20.0985	5.99445	9.1355	11.8106	8.73352	12.0157	8.21742	13.6647	12.2929	9.57785	9.64941
Itgb6	6.21234	7.81368	7.92915	7.18882	5.60331	5.72002	7.24039	7.71282	7.43083	9.22446	5.21074	5.48279	5.71482	5.69062	6.19295	6.6539	16.4188	5.63533	5.049	5.20665	4.64285	8.85982	25.2545	4.85243	10.3305	5.04211	7.56989	6.20487	4.40474	4.31251
Acbd5	7.52392	8.80171	9.19234	17.1062	6.37933	10.6301	8.03939	6.6926	8.23597	8.93731	5.81017	8.85535	10.4954	10.1145	9.97941	7.3127	4.50416	20.9324	7.52109	8.07535	13.9768	8.71138	14.8836	9.3336	11.3723	7.92082	8.0878	9.00875	7.62612	5.85367
Faf1	13.4457	8.57544	13.9675	10.9287	10.745	9.33426	9.19749	10.8398	11.7847	14.0238	7.47144	11.3943	11.7299	11.6784	8.92869	10.1499	9.18767	10.7058	9.09344	9.46145	11.0674	6.96401	24.0296	8.39678	10.1773	14.1755	13.2918	11.6136	22.0114	7.61892
Mkks	9.25961	19.3758	7.04009	10.8087	7.89159	7.44109	8.14712	6.18249	7.54878	6.86066	8.59323	8.57907	12.3591	11.1717	24.5055	6.60119	7.814	4.91219	9.82721	5.59704	7.47332	9.14398	10.5427	5.18917	11.4992	5.85338	8.74245	3.63033	8.22191	8.45123
Dpp8	9.95074	8.48494	6.79067	5.56988	7.70852	7.98778	8.4748	6.77422	8.55392	6.20433	7.33443	9.94619	6.84443	11.2887	9.66952	9.30228	7.90775	8.07858	10.9322	19.4931	6.77996	10.7768	11.6559	7.85715	12.3747	8.88039	10.0683	8.11306	11.5707	25.0061
Smim7	12.1145	7.85894	11.6383	11.147	8.26965	9.13685	4.96458	8.08519	8.02058	10.8909	9.59085	9.45555	10.2285	9.76857	8.70112	9.04754	5.59657	10.7058	9.84905	9.51409	9.70259	6.02247	24.2273	7.46861	9.26678	6.96125	10.6608	10.9905	6.89474	16.6189
RGD1563348	4.57875	8.46231	3.59246	6.92687	4.31391	10.3618	6.54911	5.99886	9.35393	8.12203	5.75023	5.45897	5.19529	4.85262	5.15675	5.06838	6.51778	2.2935	4.5904	5.00926	4.97636	6.58231	6.3351	22.4015	5.69489	7.11827	14.2821	5.15342	4.7088	4.72409
Tmed9	23.2865	11.8412	11.5015	7.36344	13.3039	13.9052	9.0314	10.5898	12.1796	12.3574	9.44099	10.3749	7.03032	10.4799	9.40321	9.77223	6.26914	11.8141	6.98824	11.2774	24.342	13.2961	10.8221	7.63697	8.8772	5.5786	12.2436	10.1381	8.68622	9.8552
Fbxw11	5.59189	10.8117	13.8388	11.962	3.58962	6.86402	8.12018	6.01416	5.86159	5.41982	8.35774	9.93667	8.46021	7.62971	7.31146	4.64675	20.5887	8.07858	6.8179	6.62784	8.50019	8.11337	7.1517	7.34773	7.19194	13.6041	13.2753	8.57172	7.14949	22.8705
Mrpl48	12.1184	12.1278	11.594	7.84731	21.1596	9.16216	9.5925	7.67711	9.40008	6.78374	21.7036	8.70768	8.2648	5.82216	8.7108	5.59103	6.19169	10.3678	9.43412	6.89103	10.8655	8.52053	9.6144	9.00118	6.75858	13.8222	9.10292	5.24861	8.18083	9.26069
Smpd1	3.50279	6.33542	8.26305	6.26111	5.25708	8.73189	5.04987	6.00396	6.37954	10.1936	13.9495	9.70325	8.15994	5.53471	10.5508	6.68903	9.15913	10.2993	5.55128	9.46584	3.74324	12.5327	9.01699	10.3654	8.18559	7.78561	8.88747	6.26978	14.0031	4.95275
Tppp3	13.4496	14.5074	15.2106	21.9412	9.98885	13.0194	8.01245	8.55959	10.7898	9.51673	7.59561	7.54539	10.0569	11.1717	8.73985	6.28936	7.92406	6.04182	6.74802	9.63252	9.25937	5.94189	10.1473	17.7865	9.54693	11.7111	8.80874	11.8516	4.78687	9.16465
LOC298139	11.0267	14.5074	9.78371	13.9301	24.0926	6.29708	8.14263	7.98827	7.85135	6.54275	6.25118	8.28373	8.91301	9.41778	7.68913	7.10188	7.21073	8.45085	7.51672	7.74637	5.89791	12.134	6.41676	18.1319	9.09169	7.8554	11.3072	11.4535	7.90142	5.59757
Tm2d2	11.3605	12.8745	9.43372	10.4558	14.5535	10.048	11.4553	6.05497	11.9232	9.94744	7.33871	7.66448	8.78432	9.92935	10.207	20.9806	10.5246	7.9331	6.57331	7.72444	11.7081	10.4545	9.44678	10.469	11.7575	11.7809	12.604	6.87988	22.0114	11.5473
Pdp1	5.11281	11.8865	9.75555	8.80048	12.6234	6.74254	5.80398	5.63668	6.45134	6.69658	8.67458	12.9805	12.3066	9.73446	11.7952	3.67611	5.62103	6.34135	9.24631	9.49216	5.04657	16.9096	6.50702	4.32575	8.05427	12.8234	10.7975	13.2968	22.0114	8.31861
LOC100911186	5.90997	5.83764	4.88783	10.0665	23.619	5.89213	5.66932	8.77384	7.71802	6.46071	5.28353	6.0687	7.3306	6.53836	6.13969	4.42715	4.94846	5.85783	6.21516	16.7034	8.17545	4.84343	6.63166	3.74294	4.24162	8.77571	10.0145	4.03706	4.44172	5.02592
Bag1	5.04213	6.79549	4.69875	4.44935	6.97627	6.77291	4.9152	6.38654	5.6821	6.81964	6.97477	2.51513	8.79386	4.34104	6.81757	15.293	7.72432	5.69095	7.34202	6.12341	5.09923	4.58047	5.67753	9.17386	7.85729	7.06157	7.53674	4.30966	19.7885	5.06251
Mrpl50	7.54748	4.86093	5.62	4.63126	3.68115	5.59347	7.54113	10.9418	8.67187	7.59902	8.39199	11.8564	9.51357	9.95858	11.2674	5.91604	7.11698	5.34436	6.80916	6.99191	3.83101	4.2327	4.7019	22.8418	5.86999	5.21221	7.70247	24.5166	4.88959	8.30032
Anxa2	13.4732	9.46542	8.99522	20.1658	14.9037	11.3844	10.3197	9.51349	8.53854	7.33239	8.53757	9.70802	8.19807	10.4896	9.32089	9.74148	7.69987	6.05894	8.32911	9.47461	14.227	12.1807	24.7129	8.35793	9.6695	14.1537	13.499	9.2424	11.1146	10.564
Dnajc7	6.50686	19.2891	7.8326	6.92687	9.75803	10.3011	7.06532	6.64159	7.90263	7.41956	8.12225	7.38819	10.8672	25.0572	10.328	9.25397	5.34792	6.64515	11.0807	10.2203	11.6159	11.5233	14.0069	4.50275	10.8908	7.75072	5.67638	6.04045	6.6441	7.4177
RGD1307929	8.41925	8.52265	8.66936	7.58536	6.94444	7.57776	9.26033	7.81994	8.10264	7.94257	8.32777	12.9805	10.7004	9.76857	11.2819	7.6948	7.56535	20.727	5.24991	9.70271	9.09261	11.1501	9.29206	7.66719	8.79403	8.40061	11.6469	25.0229	10.038	10.5778
Uchl3	5.24632	6.76532	4.48152	9.15701	3.58962	6.73747	8.99101	6.52937	5.90262	7.31188	5.58324	5.78766	7.22097	4.49695	8.00386	5.87651	20.3278	8.07003	10.1155	5.41281	10.7997	9.86074	9.58002	6.68721	10.2998	7.10519	22.7014	12.4876	7.99592	6.97867
Rbm26	5.88641	5.70942	3.32292	5.31157	5.81423	6.11485	5.77256	6.09578	5.96416	6.13255	6.72216	8.46474	6.34397	6.75274	10.2409	8.12961	17.2544	6.4526	9.67871	11.1765	4.30495	5.01307	3.78215	5.0208	7.18756	5.34743	3.63371	5.33082	7.05909	18.7089
Ctsh	13.4457	9.94812	15.0738	7.87641	14.5535	11.6121	10.6563	7.6261	12.4616	9.12191	8.68743	10.6512	8.62704	12.2095	11.7806	19.4917	4.73242	5.68239	9.09344	9.38688	8.95218	10.0643	9.91096	7.94349	9.45063	13.0414	13.2918	21.3925	9.79973	10.8018
Bcap31	4.49236	21.2086	5.92172	8.31298	5.93759	10.6149	8.68577	5.95295	9.24624	5.94283	6.65793	5.11124	7.04462	5.06212	7.79566	5.50319	8.19716	7.47954	8.95805	10.773	8.40364	4.88584	3.79505	8.86735	18.2447	7.74635	4.61568	3.84235	5.22652	6.14635
Impdh2	6.45973	3.26953	9.26073	7.19609	8.81884	4.72281	10.3376	5.85603	9.75906	9.40905	7.82254	5.37323	8.35059	8.97929	7.94576	9.49553	15.6565	8.76749	7.86177	5.75495	5.84964	8.00734	8.31644	8.56083	7.76974	4.33988	17.9034	9.96933	9.72577	8.37806
Erh	10.9717	8.19079	9.35326	8.73863	11.7359	9.66329	10.0324	6.96296	7.98469	10.6294	8.22929	7.60731	11.0674	13.3349	10.604	8.14718	16.4188	10.5261	9.36424	20.3266	12.6164	7.34148	13.4567	6.41523	9.78331	8.69284	7.17212	11.3496	7.21934	10.0656
Acss2	11.278	8.46985	11.4251	9.60085	9.96099	9.06092	11.406	6.37123	9.87188	7.19395	9.48381	9.71278	10.667	11.2594	11.2964	9.02998	8.60885	7.8518	9.25942	10.773	6.03395	7.22273	9.05997	8.81554	22.7927	10.5247	10.3584	9.57558	20.3432	6.93751
Fn1	12.1066	20.526	9.48199	8.24385	10.6694	10.8174	6.37405	8.64121	9.84111	6.48635	9.28685	10.5654	7.15901	6.94275	9.74215	11.2787	6.47702	5.87494	9.47343	9.19388	12.3444	23.5173	8.82359	6.80377	9.62572	10.9566	7.77291	10.9299	9.38473	11.0122
Hmgb1	9.51093	10.5251	11.8153	9.42623	10.6256	4.86455	8.65435	5.98355	5.7539	8.61941	6.26402	7.14525	22.5685	10.704	10.6621	6.19713	9.71757	4.68541	9.6525	8.39117	6.43328	8.35088	6.01706	9.55809	5.48478	8.36135	5.95398	9.80924	5.58811	21.4894
Pgpep1	4.42953	4.83076	8.2711	4.99142	7.75628	5.35556	7.29425	9.52369	9.79496	6.17357	3.72074	6.58792	5.08566	6.14372	5.90243	8.41509	20.6213	4.56132	8.39025	6.2857	7.5918	5.02156	5.23054	9.66602	6.39089	5.1337	4.49138	6.30439	6.18801	21.3705
Cpeb4	13.9758	8.51888	8.61304	10.1866	8.87455	7.20824	6.85884	8.99318	8.00007	7.65543	5.22359	7.80262	10.6623	10.5822	9.03037	21.9381	2.62505	9.46923	5.89196	6.32957	10.7733	14.3013	10.0141	6.40228	11.3416	10.4986	11.6055	8.58903	5.22652	8.02136
Mbd3	3.63237	6.82943	7.28548	4.75495	4.68799	6.74254	5.04987	7.00377	6.30262	6.58377	7.65127	5.07789	5.15716	4.82825	4.4934	9.25397	4.2229	7.0602	6.91836	10.2685	12.8885	5.05124	9.94104	5.84969	23.7995	6.34625	6.66249	7.95729	22.0114	6.97867
Fbxw5	7.49643	8.81302	4.97634	8.00738	4.74371	5.48717	16.6309	7.39145	7.11801	5.17882	5.01379	10.1558	12.1541	4.73569	8.58007	2.43317	6.86833	8.11709	4.88303	4.50483	4.31372	8.5587	8.40239	7.90463	4.0534	5.56987	4.64469	4.17985	14.1922	5.36891
Tra2b	23.3532	8.16816	10.0814	12.4204	12.3488	6.59068	6.09575	10.8092	9.22572	6.74272	21.3482	12.5375	8.2362	12.0536	12.4827	5.43731	8.97163	4.69397	6.80916	10.6589	9.08822	5.35237	4.87382	9.35087	6.83737	5.34743	8.18724	5.88468	5.78123	9.49392
Rabggtb	4.43346	8.96009	9.25671	9.49899	8.59996	5.90225	6.10922	9.16152	8.05135	7.69645	21.3482	9.96048	8.6461	6.17783	8.18302	8.99045	19.0561	4.85656	8.75277	5.00488	9.86934	4.04608	11.4926	6.90738	7.8748	8.13454	7.69419	9.6102	10.905	8.11739
Bcap29	8.28574	7.42526	9.40556	3.90364	8.85068	7.28417	20.3162	6.6875	8.53341	9.84489	18.6551	8.53143	10.1475	9.58343	10.5217	10.1499	8.35205	9.79443	6.09287	10.6414	12.1293	9.61051	8.96972	6.24255	10.8076	9.91847	6.17772	8.58038	9.88602	10.0015
Pex13	8.72948	3.66172	5.03668	12.8678	10.737	7.679	6.65236	4.19818	5.94364	9.08089	8.42625	7.15478	8.39349	4.94031	6.84178	7.43128	7.00284	9.46067	6.76112	10.4966	11.1069	11.9304	10.2247	6.82967	16.4149	11.4058	11.3776	13.4439	21.1115	6.98782
Klhl24	6.338	16.0007	7.07629	4.99142	5.75851	10.2049	4.84787	6.12638	9.30777	7.80925	16.7497	11.5324	5.62426	10.3142	10.5895	9.10464	7.66726	5.18176	6.30688	8.18063	9.56216	5.02156	8.00269	6.62245	9.37184	4.38349	4.1392	9.05634	7.65899	9.74544
RGD1560212	6.28302	10.2687	7.18491	8.32753	3.20359	9.24315	6.48627	7.97807	7.47699	10.4858	4.71836	19.4732	9.85198	10.9379	8.16849	5.10352	6.98654	10.5261	6.9795	4.93908	9.31203	4.06729	7.10013	5.56476	4.47362	4.67573	21.2098	5.36544	6.59068	4.73781
Crip1	12.6446	9.42394	11.248	21.9412	15.3693	8.68127	5.23839	7.77403	8.12315	9.4193	7.39866	7.35961	6.96359	5.81729	7.81503	5.85894	7.41046	5.71235	6.59515	10.5975	23.7716	12.1425	13.0269	7.25275	9.34995	14.1101	9.86115	8.64528	4.90603	5.30489
Pdpk1	11.7807	7.3687	8.91074	6.86867	14.1913	8.97992	17.2997	10.5847	10.1642	8.25535	8.48191	11.2704	10.3048	11.7515	10.7541	10.0885	7.94036	12.5586	11.0108	8.41749	10.9094	8.88951	24.7172	8.5004	12.5673	12.1822	9.41782	10.1121	8.263	10.0793
Nr1d2	4.28816	4.52153	3.76142	9.98649	6.93648	11.3894	22.4169	9.86037	8.43084	7.26061	4.96241	7.33103	5.11903	10.7917	8.8948	8.7972	6.04087	5.9648	4.99659	10.0273	13.595	6.89191	9.53704	7.40817	10.1816	4.57105	7.69004	9.23375	4.60608	14.4375
Trappc13	9.75832	4.54793	7.28146	4.07827	11.5091	8.823	6.61196	9.38597	7.18468	7.10165	21.0528	7.83596	7.40686	6.22655	6.68199	8.12961	6.64822	6.10601	5.45519	6.23745	4.63846	4.20725	10.0356	22.8418	6.80673	12.2389	4.39194	4.90678	5.93736	5.97257
Zfp180	12.0163	8.93747	11.2923	15.7164	11.4693	9.31401	11.4553	6.37634	11.9898	9.85514	6.44385	8.96491	7.07322	10.2168	8.54617	9.37694	6.3262	8.09142	8.77461	9.865	7.58741	9.19487	9.05138	21.9396	8.95162	13.1112	9.0242	10.8953	5.77712	9.89179
Polr3k	5.47801	7.10849	7.03606	6.28658	4.73177	6.29708	8.89225	7.6567	6.6975	7.57851	6.97906	8.63623	11.2771	5.14981	8.64785	8.25698	20.6213	5.59682	6.45975	5.47861	6.86773	3.74072	3.75207	6.80377	7.03435	8.89784	11.5102	6.61593	6.52494	6.04574
S100a6	3.84835	5.01931	4.48554	5.42435	5.18147	6.16547	4.98702	7.1517	5.80005	6.63505	8.59323	8.47903	6.66808	5.18392	19.8039	5.64813	5.2501	5.56686	5.72599	4.65396	20.4101	5.57715	2.94836	6.7606	6.82862	5.33434	7.57403	8.35537	6.88652	6.33843
Poldip2	6.40476	6.67482	7.01997	3.63079	3.62145	5.90225	3.75261	10.0134	8.09751	7.53237	6.25974	7.47394	10.4382	7.47381	9.379	6.63194	9.78279	4.51853	5.38968	5.53124	12.8315	4.14787	4.11309	20.9121	8.46574	5.13807	6.33931	6.14429	5.18954	4.51373
Rab18	5.40733	5.90174	5.86942	4.35113	4.61636	9.91639	5.53914	10.5286	8.23084	8.78349	5.13367	6.07347	6.58229	5.02314	5.11318	19.3161	7.05991	10.6245	7.56477	9.45707	13.4327	6.4169	12.494	22.8418	7.55088	9.29911	4.5411	8.74047	9.42993	9.7363
LOC100359583	6.08275	8.42083	3.76544	15.9202	6.69372	8.1042	9.36357	6.57018	7.28724	7.46058	6.49951	7.21194	11.7299	6.34835	7.10325	8.18232	2.93891	11.4204	8.14566	9.85184	24.4912	13.1434	9.28346	3.99333	8.32566	8.22178	6.91109	6.33035	8.13563	4.94818
LOC100912338	12.1851	11.5923	7.85271	9.01149	11.2186	6.32746	7.8329	7.56999	9.12829	8.16818	8.07087	9.59369	8.46975	5.0816	9.57268	10.3388	21.0656	9.99126	8.18934	6.72434	12.0679	14.3903	24.0081	9.91209	13.04	7.2404	5.20818	11.5876	9.24092	9.83691
Tmem11	7.75561	8.54904	5.99815	3.26334	5.2332	6.1756	15.2528	8.05459	5.70261	6.47096	6.23405	5.5733	6.03892	8.49208	6.4641	9.2364	19.3495	7.49237	4.69085	9.14125	10.0493	4.05881	6.59298	9.0314	6.05821	7.45848	4.97201	10.2419	5.18954	11.1128
Wdr26	22.5207	14.5074	9.3613	14.3776	13.5904	6.33758	5.59301	6.94766	6.76416	5.82489	5.74166	8.05508	8.58414	18.9525	5.92179	6.57484	5.53543	3.79539	5.31543	5.67161	9.79035	7.8377	10.0743	7.04985	9.88399	12.0339	5.9747	11.804	4.96355	4.82013
Atp6ap1	7.13909	6.24491	4.03498	6.77408	3.43043	5.26444	6.48178	6.62629	3.6308	7.53237	6.76926	4.81114	9.566	5.39342	8.42512	16.8829	9.30995	17.0472	7.2765	5.37772	7.98675	3.97398	4.59875	9.70919	6.63164	11.3142	3.18623	7.31258	8.79716	7.95733
Lmo7	9.20856	4.14442	5.86137	10.012	11.5489	7.26898	21.4698	6.93235	8.30777	4.91732	5.51046	10.6798	8.49834	11.6833	12.2503	6.68025	5.9675	18.6347	10.5479	9.63252	12.0811	11.2688	12.5757	8.0212	9.83146	6.05402	10.7934	6.4818	8.89577	9.65855
Pdhx	3.23183	13.8323	10.3268	10.8669	9.75007	4.54564	7.39749	23.8628	7.7693	7.63492	8.01093	4.67776	5.60042	8.36053	7.57777	5.7184	7.0966	9.29379	10.5173	6.39536	6.37185	19.5349	6.86804	6.09145	9.26678	4.52743	9.60427	12.6477	7.35494	6.38416
Ppa2	5.57618	7.16506	7.41824	6.31568	6.65393	5.46692	9.17056	5.96825	7.85135	5.92744	5.69457	8.06937	8.10274	4.81364	5.22939	9.17052	9.62382	11.9467	10.5479	5.44352	9.29886	5.63653	11.4367	9.38109	24.154	7.78125	21.736	7.67171	9.45459	4.85672
Slc38a4	12.5621	14.1378	9.06763	13.5845	24.0926	13.2522	9.88876	9.29925	13.9078	11.9626	7.06041	12.5614	11.2533	13.106	11.9114	8.12522	20.4419	10.6716	9.91456	9.11493	9.79913	11.8541	11.3508	6.78218	9.13984	12.5137	12.7615	12.4573	10.4736	11.7942
Eif3d	15.3463	5.70188	11.8193	6.98508	15.5205	16.6944	6.42792	8.04949	6.01544	6.2351	6.07563	7.18813	9.07507	6.54811	8.58491	8.30529	11.6945	7.53516	4.94855	5.82952	6.38501	5.61532	6.89813	4.77473	2.87152	10.7516	4.24693	4.64284	7.1988	5.73019
RGD1566093	9.04755	6.07898	3.89417	10.5577	24.4508	9.76959	9.45335	7.91686	5.2821	9.76285	4.941	4.88259	23.1023	9.1693	8.6527	6.34646	7.9852	6.5938	5.28922	6.04007	4.03726	6.63744	9.59291	6.97214	4.60494	4.61466	9.71614	6.54238	4.95123	5.68903
Hspa1a	6.65608	12.0071	10.6567	4.40206	11.8036	5.67446	6.12268	6.84053	8.40007	6.22484	8.12653	9.5794	21.8583	7.58587	4.66287	6.66707	7.16589	6.33707	5.95311	7.68496	4.80522	7.03611	3.83802	7.68446	7.14378	10.4855	9.75343	23.543	9.97642	8.31861
Son	4.57875	11.4565	8.13432	10.1902	6.56637	12.3968	8.28627	8.04438	11.7488	28.4733	5.03091	4.9731	10.8338	10.665	7.66008	6.73735	4.50416	8.30537	4.37638	8.81227	8.35976	4.77557	6.97549	8.19388	9.49441	8.33954	8.06294	9.29	10.4982	8.62044
Nudt3	12.1145	7.55348	11.8716	4.62034	14.4261	5.24926	20.7965	8.18721	6.60006	4.49173	7.38153	10.6226	11.0245	8.42387	12.2891	5.80624	9.73795	7.35545	7.25466	6.24184	3.9846	10.3485	6.3394	20.9121	4.25913	5.27764	7.1224	7.61546	5.18954	4.88873
Dennd4b	8.72162	4.20476	3.81372	15.3708	5.96545	8.9293	5.48079	9.16662	7.90263	7.12216	9.98476	10.6702	8.40778	5.24238	10.2893	6.04341	5.29901	6.57669	10.9541	10.2993	6.01201	6.12426	7.11732	6.14325	23.7995	6.27647	5.14189	7.62844	7.4289	8.79422
Mkln1	15.3463	5.06456	12.1492	9.37165	24.4508	8.62052	8.40298	6.91705	5.70261	6.3479	9.137	10.9942	6.16762	8.85261	7.9506	7.94515	7.76916	7.80901	4.44627	7.30335	7.09592	7.77832	7.46115	18.4039	8.09804	9.82252	5.12117	7.19142	4.5691	4.87501
S100a11	13.9719	10.016	14.5911	14.5086	23.4519	7.49677	6.25286	6.82523	8.42059	6.15818	6.23405	7.46441	9.55647	6.44579	10.5701	9.64486	9.85208	5.14753	7.54293	7.20246	7.82	9.40269	20.544	9.31201	6.00568	13.8614	12.4963	13.2968	10.1613	10.4268
Kdelr2	9.9743	12.2485	7.37399	21.5846	10.7649	11.5514	8.99101	10.9061	9.24624	14.0238	7.56992	7.29292	6.68714	7.49817	5.83948	7.4796	7.62242	9.24245	8.63047	5.32947	9.1321	8.49084	9.36512	8.47018	19.2164	6.79114	10.2051	12.3146	11.5789	11.5884
Cdc73	7.94803	6.72761	11.8394	11.318	8.91435	5.76052	5.69625	6.96296	5.56928	7.39392	5.42482	9.64609	9.56123	4.61875	9.66468	5.70522	21.0656	7.00458	5.1975	7.74199	5.77504	9.14822	24.7172	10.3438	4.04902	10.9478	7.00225	5.28323	7.10429	5.15855
Stim1	8.57633	4.7855	11.417	7.99647	6.91658	6.59574	6.37854	6.38144	8.26161	7.20933	5.78448	6.61651	6.97312	5.96346	8.44933	21.758	7.33301	8.44657	11.5044	5.98304	11.8441	7.92252	10.6029	4.57182	11.9501	11.3709	8.80874	10.0213	7.63434	25.0061
Grina	3.92689	7.66284	7.56306	4.98415	8.30547	8.1852	15.9441	7.21801	8.27187	7.33752	3.62226	7.11667	7.06845	7.55663	8.60428	5.18257	7.42269	7.92454	4.64718	9.61059	7.82438	9.68685	11.6645	4.20487	7.3539	8.06912	6.9691	9.44577	7.21934	21.7135
Bccip	7.6378	5.89043	6.91538	10.5577	8.13036	7.12725	7.79699	6.61098	6.72826	6.80425	5.21931	9.02207	9.07507	8.83312	9.39837	9.64925	6.64414	9.94847	8.68725	6.96121	8.28077	10.2085	7.80928	21.3956	9.48565	7.8205	13.4493	24.5166	7.20702	6.32471
Arf4	11.5333	21.8723	15.0738	14.3776	14.4301	11.0199	7.53664	11.3754	11.2822	6.14793	9.23976	11.4419	11.2151	9.89037	8.12976	10.1499	9.15913	6.8976	11.0414	6.89541	9.7728	12.4097	24.0081	10.033	7.77412	8.88475	12.198	10.3112	11.205	12.3979
Ccser2	12.0438	9.29195	9.93658	9.84096	7.4976	7.59295	8.28627	6.27942	6.5539	8.45532	7.30446	7.8836	8.75573	8.41412	21.7601	6.83836	7.47568	9.53341	8.39462	8.25519	13.0289	8.43994	4.93399	8.62559	7.6428	24.5127	11.0337	5.65535	6.0483	9.85063
Dhx36	6.00814	7.14243	8.28316	17.1062	11.3499	5.74027	7.72517	5.96315	8.30264	10.3423	3.13843	8.45998	10.6384	8.89646	10.2264	4.87074	6.62784	8.1556	8.38589	6.32518	7.5172	8.35088	7.08294	7.38226	4.43422	10.673	10.6567	8.58903	16.0329	6.11891
Dnajb5	3.56169	6.56168	11.4653	7.67268	7.48169	8.41298	4.81196	7.45776	5.56928	5.66081	6.0371	8.03127	7.17331	9.1693	7.79082	14.9548	6.6686	4.30031	5.41588	6.72434	4.67795	5.39902	7.06145	5.05534	7.69095	10.0493	7.76048	7.5419	7.07964	22.3583
Card19	8.03442	10.0688	4.49359	3.10691	11.9866	5.32012	17.6902	4.91233	5.87185	6.29663	3.29257	6.48789	8.06461	5.09135	7.47608	4.97615	6.08163	15.7892	5.09268	6.0927	9.05312	9.87346	10.3021	4.46821	4.95075	10.045	4.98858	6.61161	6.4592	5.41007
Fstl1	11.3252	22.4606	12.3785	7.52716	12.8979	10.8073	8.79799	6.06517	10.5898	6.29663	8.4134	9.32217	8.79862	10.8599	10.6476	8.62591	21.6281	4.81805	10.5784	8.32538	9.21987	9.11005	8.96112	6.50589	9.44188	9.84869	12.198	10.9905	6.29895	10.2211
Snx5	12.8527	8.68857	6.03436	21.5664	4.69197	7.04119	7.33914	7.98317	7.05134	8.84502	5.96431	7.90265	5.81014	7.44457	9.30637	7.93197	7.08844	11.66	5.78713	4.71537	10.4574	23.7421	9.28346	8.37952	8.27751	11.0089	6.28131	11.1895	6.33182	4.98019
Atp2b1	13.8816	10.246	9.44176	8.7932	13.1487	8.42817	7.72068	12.2426	10.6001	9.96795	8.88438	10.2225	10.5765	11.4835	12.5263	7.28635	10.0437	20.7356	11.1375	11.08	12.3839	9.82257	10.2935	9.76531	5.00765	24.4516	13.1924	12.2929	7.46588	5.62501
Ahsa1	6.38905	5.59629	3.8821	7.6363	5.69882	6.55524	8.25934	7.48837	7.21032	6.07102	6.53377	7.85978	7.41162	6.17783	5.09865	20.9806	5.40907	6.49111	10.3775	5.37333	8.03941	9.45783	10.6072	4.85243	4.44736	4.05201	4.55353	8.16932	18.7777	4.95275
Copa	13.9248	19.6134	6.56941	11.7	10.8803	6.74254	6.47281	6.23351	8.97957	6.40943	9.18838	7.60255	7.46882	7.73203	5.21486	7.00087	6.98654	6.20014	8.05831	9.18072	11.5545	25.2223	8.25197	5.9792	8.24687	10.3328	7.74805	7.9097	9.67647	10.8018
Igf1	8.9376	18.7461	9.69923	11.4272	9.10139	7.20824	7.53664	7.6414	8.30264	8.97833	6.57658	9.16022	6.89686	10.665	11.3449	5.69644	7.64688	9.66178	8.8969	9.29038	10.6022	18.4958	8.32503	6.75628	9.9978	12.1517	8.39441	10.8131	4.50747	10.5686
Anxa5	13.7088	13.7079	8.47626	21.5846	11.9667	7.02601	6.06882	6.63649	8.02058	6.21971	10.2459	9.50795	5.54799	7.81973	7.01125	9.82493	20.2952	6.71361	9.6394	10.4659	4.28301	6.31087	6.60587	9.68328	5.72553	14.4415	12.9521	10.6054	8.66978	11.7073
Ptgr2	21.0874	10.3893	7.04411	10.5577	5.93361	5.78582	6.12268	6.33043	6.79493	6.553	9.02996	7.24529	6.68238	5.93909	5.55864	7.16337	5.70663	7.12011	8.36841	6.11025	3.3834	3.90188	6.50272	5.65542	5.13897	4.16541	6.65006	3.92456	4.57321	14.5884
Dnajb9	22.2458	14.1378	13.7463	14.1412	15.4966	10.7061	9.90671	7.71282	9.92316	7.68619	7.00475	8.72674	7.98358	10.2071	10.6137	10.1455	7.87107	8.63912	7.2765	8.98334	9.1321	9.12702	5.38097	17.5447	10.0547	8.89784	12.5378	11.5054	7.48642	10.2668
Rnf2	4.41775	6.19212	7.21709	18.234	8.45669	6.19584	8.10672	6.2284	6.3898	5.83515	5.82302	6.83086	7.61181	10.6894	7.67945	4.77851	5.00553	5.32297	4.64281	6.36027	11.787	6.95553	8.65167	5.02512	22.7008	6.11944	7.18041	6.81497	7.47409	8.26831
Dync1i2	10.7636	4.05768	8.29523	4.83135	7.54138	6.63623	17.4074	6.6824	7.41545	7.50673	5.84871	9.21738	11.1055	10.4166	6.30431	4.7302	8.97571	7.81757	5.73472	5.07506	21.9328	8.16003	7.80499	10.3222	4.93324	6.35061	8.14581	7.68037	6.414	5.61586
Klhdc3	14.0033	11.1624	12.7204	11.3326	4.26217	8.08396	7.39749	9.0697	10.836	9.26035	14.7631	5.51614	5.34781	9.37393	9.53879	9.20126	7.40638	9.63183	7.49052	9.13686	10.0273	11.8923	7.91243	17.9851	11.1622	8.24359	11.0337	5.31784	5.51004	9.14178
Ralbp1	12.9312	11.087	12.5957	5.47893	14.442	8.81794	9.88876	10.0593	13.9078	9.38341	8.82016	7.4263	10.0522	7.99512	9.35963	10.6418	9.53006	6.98318	11.3253	11.08	9.22426	8.29999	6.04285	9.59694	22.1142	12.156	8.12509	12.3405	15.47	10.3583
Sdhaf2	9.05933	5.44921	4.26428	9.01149	3.37074	26.9651	8.50622	8.81975	8.10264	7.39905	21.6779	9.32694	5.4479	8.29232	9.08848	10.8395	6.46887	6.0675	10.8798	6.69364	7.15736	10.6666	8.11443	6.24255	9.21426	8.18688	6.33103	4.42649	8.29998	8.32776
Mapre1	9.29888	8.57544	8.4119	6.89049	19.8941	4.42416	7.73415	7.13129	7.23596	6.95295	7.82254	8.38853	9.70422	11.9902	10.2845	9.46918	7.22703	9.77731	6.27631	9.93518	11.3263	21.7827	9.05997	8.48313	9.13984	8.8455	8.0878	9.79626	10.4777	9.57624
LOC100909586	14.5845	9.98583	14.7802	19.973	14.5296	12.4119	8.59599	6.14679	7.82058	9.43469	6.26402	8.59812	17.969	8.2436	9.39837	6.1005	7.38193	8.20695	9.19827	8.87806	3.39218	6.80285	7.34941	8.10322	5.09082	8.20869	13.0764	6.91449	4.86494	4.1433
Mrpl13	6.38512	13.0253	23.0754	9.86643	13.1964	8.49904	8.4748	7.13639	5.46671	8.7117	9.53519	7.96934	12.0016	11.8197	11.0108	5.2221	5.99603	4.60839	5.4814	22.5066	11.3702	9.16943	5.87093	4.56319	8.16808	6.03657	4.7897	5.1015	5.19776	6.73172
Fos	4.1036	4.79305	10.0975	10.8269	4.73575	8.31175	8.49275	6.79972	6.47698	6.10691	19.9395	5.88769	7.08275	8.17539	5.78622	5.16501	7.55313	6.3499	8.30727	8.50083	3.69936	10.3909	9.39521	4.82222	6.46968	12.3567	22.7014	7.76258	7.42068	11.3415
Aurkaip1	11.1916	9.42394	11.6061	21.6174	15.5205	7.96753	4.91071	10.4011	8.75392	6.45558	9.38961	7.86454	7.03032	4.86236	9.85836	5.31873	6.74605	9.18682	8.62174	5.84268	5.42397	5.41174	4.66752	6.78218	5.96191	14.1057	4.45824	4.1885	14.3319	5.23172
Csgalnact2	8.11295	10.246	10.2343	3.40887	9.33221	6.83365	6.75111	6.53447	6.29749	6.33765	5.63034	9.3317	5.67192	7.42996	24.9364	6.58363	7.81808	6.65371	8.99299	7.75953	4.40588	8.27454	4.35377	9.08321	6.05821	3.83392	11.4563	20.9858	5.92504	10.4543
Mier1	6.86028	6.72761	8.26305	13.5263	8.38108	9.04067	5.58852	8.56469	8.89751	8.01436	8.23357	11.5277	10.0188	11.8197	10.6234	10.9054	8.49064	21.6684	10.7968	11.2774	13.4195	7.79104	8.72474	10.1366	12.8212	9.75273	11.6345	8.73182	8.12741	10.0473
Rbm8a	7.97944	9.54084	9.06763	7.67268	9.42772	6.30721	7.21345	8.65651	9.09752	6.09665	6.55089	6.84039	4.66623	10.0512	7.84892	7.15459	21.0656	4.91647	5.57312	18.9887	10.159	9.50872	9.46397	7.37795	5.49354	6.0104	3.642	4.2361	6.6934	8.37349
Tmem256	10.4769	12.2334	23.8317	13.9993	9.65456	10.0936	5.60647	8.6106	11.9181	12.2292	7.72834	8.16941	9.23712	9.69549	22.9173	6.53531	9.77871	5.07051	4.99222	9.53602	11.2604	10.0558	8.93533	8.84145	6.78922	14.4503	12.9562	8.28182	5.4936	7.13873
Polr2j	5.43874	12.4069	7.86478	7.82548	20.4911	5.96806	9.13016	5.39693	7.45648	7.58877	4.85537	8.7839	5.72911	7.01583	25.0042	10.5628	5.27455	7.03881	6.59078	4.27235	6.8414	12.3885	10.2075	5.53454	11.5605	8.13018	3.80359	5.20967	7.48642	6.80032
Mrpl22	15.3463	6.5202	13.1227	13.0679	7.84383	9.5823	17.4074	6.61609	9.70265	7.09652	5.96431	8.25515	9.70899	7.93179	7.8005	6.93059	6.36289	5.78509	10.1155	22.5066	7.98675	11.5911	11.8149	5.85401	11.5649	12.5137	12.0613	4.88515	5.18954	9.24239
Mrps33	7.81844	8.71874	4.69473	5.34432	5.46004	5.95287	7.24936	7.1568	8.24623	5.92232	21.7036	4.87783	9.94731	9.39342	7.97965	4.41836	6.45256	9.04134	6.25011	5.2242	7.30217	5.48808	3.79075	22.5181	6.02319	9.82688	4.98444	6.07506	7.68776	5.46952
Npc2	13.4457	11.3019	13.6578	13.9047	5.35657	3.90277	6.54463	8.53919	9.32829	6.76323	7.80541	7.39296	7.09705	16.4823	6.99672	7.38736	5.12781	7.52233	12.2207	7.76831	6.36307	5.22513	6.81647	6.54474	7.44582	14.1057	7.27571	10.4323	4.68004	4.53659
Matr3	3.94652	3.48825	3.4597	7.99283	5.83014	7.81061	6.50423	5.13167	6.95904	6.48635	13.0547	6.72607	9.28479	9.48599	8.18786	7.44446	8.34798	20.7784	9.03667	6.07077	5.41958	4.07577	4.58156	5.85401	3.8608	10.0057	7.35443	4.73803	7.28098	2.41007
Ccdc47	3.52242	5.02685	4.91599	5.52258	4.74371	6.96526	7.53664	23.6588	6.77442	5.90693	13.1489	6.36404	7.15424	5.82216	5.77653	7.38736	9.46077	5.12614	6.96203	5.48738	5.13873	7.41358	7.88665	7.28729	5.81308	5.37796	9.79072	10.8217	7.35494	8.30947
Eif4g3	8.43103	5.27952	8.99522	10.1538	12.3488	11.025	8.72168	10.6663	9.32829	9.39879	9.31683	11.1656	8.37442	11.5566	11.4998	20.1462	9.49745	11.6985	9.73549	10.001	9.02679	10.4503	12.7304	10.469	7.24446	7.59806	21.7277	8.84865	7.17414	9.20581
Aqp1	7.89698	3.94078	5.21771	5.63172	5.79831	6.0288	20.9177	8.35045	9.79496	6.46071	5.62606	11.1942	6.27724	5.60779	9.15627	4.98054	7.92406	19.6488	9.29436	7.08403	4.14258	10.4545	3.679	4.41209	10.0197	5.61349	4.59082	6.33035	5.39088	8.20428
Tgfbr2	10.6811	18.0182	11.2521	10.0774	5.57943	7.70431	7.06532	7.06498	6.00005	3.53801	6.77354	11.3228	7.85013	10.2996	4.75971	9.09146	15.6443	3.02091	10.1242	4.84258	8.4958	5.59411	5.57867	6.47135	8.492	7.12699	10.0559	10.6963	7.37137	6.96952
Aars	14.1132	5.78484	8.26305	19.38	9.49935	7.88148	7.85984	7.97807	7.62571	7.2401	6.79066	6.70225	9.29909	10.246	5.8298	9.50431	20.3278	5.71663	8.97989	4.75047	10.8655	5.05548	10.5771	9.81711	6.95556	5.97115	11.1829	13.2016	7.25632	4.82928
Rps6ka3	4.83007	9.58986	7.728	10.0083	9.24864	6.43376	6.69276	8.26883	6.78468	7.07601	9.56944	7.00711	7.19237	6.25578	7.42282	7.10188	4.93623	5.42138	4.77384	10.9177	7.74978	8.63928	24.0081	8.11617	11.6743	5.6353	7.64861	8.38134	8.263	20.0397
Pdia6	15.3463	21.2086	13.5009	12.6204	9.48344	7.54233	5.68278	7.46796	7.15391	7.87078	6.05422	7.27387	7.43546	7.58099	7.19525	10.207	8.80858	8.4209	4.07938	8.04026	20.0108	7.25666	10.0399	9.74372	11.2322	14.2365	10.4454	12.9939	8.52186	11.9086
Tmem43	11.7807	10.8117	13.3038	11.3544	7.39811	11.4451	7.66682	9.40637	11.9283	11.8549	7.06041	8.3266	10.7671	10.2607	10.6621	10.0972	7.43084	5.68239	9.80537	18.8176	11.2034	7.9098	8.74193	9.17818	10.9039	14.2583	6.84894	12.6304	7.79048	18.8644
RGD1309748	8.65879	10.016	12.3101	21.9412	11.919	5.67446	8.07081	8.91667	7.45648	9.44494	6.23833	12.5375	8.59367	12.419	11.5046	20.8401	6.15093	8.05719	8.15877	6.69802	8.05697	10.0855	5.19186	7.68446	8.47887	5.87083	7.5906	11.0727	9.0437	5.3872
Tfam	6.08668	11.8789	5.16943	7.90188	7.97914	5.58841	7.59949	6.85584	7.06673	10.7473	5.57896	10.9418	8.79386	5.39342	7.72787	8.34043	15.9663	9.72596	7.07996	4.60571	8.59673	12.257	8.85797	6.41523	12.3791	3.80775	5.91255	8.93952	17.0725	10.7241
Aff1	9.37741	5.16261	11.4411	20.606	14.9037	13.232	8.31769	7.27412	10.6052	11.378	5.63034	9.41268	8.40778	8.43361	10.4781	8.33165	7.55313	19.9654	8.97989	5.81197	11.436	8.98706	8.72903	8.32339	9.16611	14.3063	11.216	7.63277	5.44841	7.76526
Acp1	23.1372	5.09473	14.2371	13.0206	14.8758	10.863	8.54213	6.99356	6.60006	6.58377	7.68124	6.81657	8.17424	10.363	8.49291	6.24544	20.3278	6.34563	7.82246	7.44371	10.0537	6.00975	6.78638	5.86264	9.82708	11.48	8.2784	8.84	6.83721	7.06099
Vps35	8.81194	4.83076	7.26939	6.5376	4.54473	6.63623	5.18004	7.47307	6.72314	8.42969	18.6379	6.37833	8.10751	6.16808	4.50792	6.11368	5.80445	4.99777	8.02774	6.25939	10.2687	7.9819	8.62588	20.9337	4.52177	8.25667	3.99832	4.14956	7.70419	7.38568
Asb11	14.4902	13.4062	15.2106	7.83275	13.5785	13.2522	10.1985	9.19723	11.8514	14.0238	7.96811	8.40758	11.1484	10.5871	8.55101	10.3432	15.3508	6.43548	9.67434	9.61936	9.2857	8.23637	9.86368	8.63423	10.348	10.9566	23.8242	12.0895	9.37241	10.4726
LOC100912034	7.88912	10.016	14.7158	21.5846	14.5535	5.97818	7.00697	8.01888	6.14364	6.553	8.34061	20.626	8.14087	9.87088	10.2699	8.12961	7.22296	5.55831	6.79169	7.32528	7.64885	6.05216	3.8939	8.7033	5.08644	14.4415	14.0335	13.3876	6.07707	5.60214
Glrx2	14.769	13.0253	9.87624	10.0083	24.8289	7.69419	6.76458	6.86604	5.37441	6.17869	7.09038	8.70768	11.2056	11.2351	5.3117	5.51197	5.10743	6.81631	6.22827	6.23745	4.77889	5.08517	5.41965	7.07575	8.03676	13.7873	6.62935	4.39187	14.5373	6.0183
Mllt11	5.50943	11.0493	10.3228	8.68042	4.01942	22.6169	9.34113	7.21291	8.10264	6.84527	7.59989	11.6706	6.46313	10.9476	9.82447	7.73872	5.0789	9.22961	4.37202	8.49645	9.95272	9.38573	7.59009	3.9847	5.14773	9.22933	5.18332	17.5632	10.5517	10.0656
Naxe	5.00678	7.64021	4.60623	3.44525	4.55667	10.6099	8.64537	9.98279	8.23084	12.2497	6.55089	6.71178	6.96359	4.90621	4.90981	19.4917	5.24194	5.84927	9.30746	5.32947	11.041	6.93009	9.23619	8.47449	11.8932	9.12901	8.05051	7.67171	6.94815	24.5854
Pdia3	13.697	12.1165	13.9675	20.8716	10.2157	5.80607	6.89475	7.44756	7.12827	6.94783	9.56088	6.88326	5.08089	6.93788	7.22914	8.76206	7.78139	6.9789	19.4317	8.48329	6.61321	4.02488	5.41965	4.52865	8.57955	8.57944	12.5916	7.93133	6.01543	5.94513
Map3k12	12.1145	7.58365	12.5837	18.867	13.2044	6.78809	5.25635	7.91686	8.26674	7.37341	9.98904	7.85978	5.77201	5.3447	6.36726	6.42551	5.95119	21.6684	8.36841	9.05352	9.15843	11.9304	12.5456	7.10597	5.74742	8.5489	6.20673	11.0294	8.59993	4.33537
LOC100911730	10.418	13.7833	7.43835	21.9412	9.31629	9.76453	8.0753	8.37085	8.63085	8.76811	7.58705	8.26468	10.157	11.4835	11.3933	6.49578	7.54497	8.74182	8.96678	8.37801	10.0361	8.37209	22.7359	6.97645	5.52855	14.1537	10.5862	8.97846	9.86958	9.78203
Tceal9	13.587	9.62003	7.20503	13.2498	14.1356	10.7921	5.72767	8.35045	7.70776	9.47571	8.57182	11.5277	7.92639	9.75395	10.3474	8.88504	6.81534	5.41282	20.7987	8.70261	6.01201	8.4145	8.72474	7.78375	11.6831	6.45966	9.83215	12.1415	7.88909	19.3537
Flii	12.9116	3.83142	8.81821	11.5254	12.4602	9.13178	6.24388	6.41714	8.4411	7.21446	9.6251	4.56344	9.30385	11.6395	6.72557	11.2831	4.89139	6.55957	21.847	9.9615	12.0284	13.5972	14.557	5.35754	12.9218	5.35615	5.41535	5.23563	22.0114	10.9162
Anxa6	10.2138	9.08077	6.38435	21.9412	14.3067	8.89893	10.4813	7.67711	6.29749	9.48083	7.58277	8.76484	9.18469	10.5432	10.5169	5.16501	6.55854	7.44103	5.11015	6.79891	6.87212	10.3485	7.14741	22.5181	5.91814	10.4288	12.5792	6.97507	8.50954	5.95885
LOC100911664	12.6524	3.76731	6.81883	5.91549	24.2836	7.20317	7.81495	7.47817	7.04109	8.76811	5.84442	5.37323	7.13041	6.28014	6.92894	10.229	20.3278	5.73374	5.65174	5.8032	6.39818	11.7608	10.6803	10.5553	12.0114	6.70827	5.45264	4.63418	10.1572	8.43752
Ube2m	10.1589	10.0537	3.69705	8.41484	4.07513	6.1351	5.19799	9.13601	6.22057	5.95821	4.67554	11.0656	10.6289	9.31546	12.3375	19.3776	6.12239	8.44657	5.64737	5.51808	5.17384	7.92252	3.59304	5.35322	5.39286	2.68244	4.86843	7.22171	16.0329	5.93141
Pcmtd2	9.00436	21.0464	12.8572	13.5445	15.3693	8.08396	9.73614	9.98789	10.2514	10.4346	8.51188	10.7608	11.3248	10.2314	23.9922	10.3037	6.17538	8.76321	5.16256	8.69822	12.261	11.3621	4.98127	6.35479	12.0945	14.4633	10.6235	8.04816	8.1685	5.8308
Rnase4	10.8264	10.2687	10.1257	18.867	11.9667	6.86402	6.72867	7.85565	8.06674	7.16318	4.88962	7.35485	9.0846	9.89524	7.70366	20.5634	6.33843	7.12011	9.46033	6.08832	11.5983	9.30515	9.33504	6.76923	6.95118	13.2072	8.14167	11.1982	5.46895	9.29727
Anp32b	10.9128	3.5599	6.80676	4.29292	5.46402	7.81061	20.9177	6.85584	9.91804	6.46071	5.245	7.67877	8.15994	8.25822	10.236	9.62729	6.86425	21.5914	6.74802	4.88644	6.77557	5.09366	7.09583	5.93171	10.5362	10.6163	10.8058	13.0674	7.27276	9.12807
Zwint	9.22034	10.4761	11.3406	9.50262	8.71139	5.46186	6.85435	6.00906	5.74364	3.91232	6.80351	22.0503	9.52787	11.313	11.1899	8.47658	4.65905	6.50822	7.55603	7.52705	9.21987	7.56202	10.6029	5.33595	9.55131	9.3122	20.8824	6.32603	5.39499	7.68751
Postn	11.5097	6.08653	13.1428	20.4459	12.2851	10.7314	9.63739	10.7122	13.9078	9.12191	9.12415	10.4988	7.95498	12.8331	11.0931	11.2787	10.0681	7.45814	9.80537	10.9265	8.30271	9.99646	23.445	9.16091	12.4929	14.3761	10.2423	10.9299	9.49157	8.56556
Lamtor3	5.62723	5.48315	4.69473	10.8232	7.62495	6.20597	6.73315	8.99318	5.24107	5.83515	6.29828	6.55934	7.40686	5.90012	6.94346	4.81364	10.3331	6.40981	22.0785	7.72883	5.74871	8.93616	5.14888	7.97802	4.25475	7.51955	6.06171	5.9366	19.5009	4.19818
Herpud1	22.7131	9.5333	13.0946	14.3776	15.5165	9.79996	11.2533	5.79991	10.0257	9.72696	9.59085	11.5563	11.2056	11.542	9.02553	8.32286	20.5887	12.5586	5.04463	7.61478	13.1825	10.8913	13.1	6.36774	10.6413	10.2761	7.03954	5.07986	7.1988	10.2302
Kdelr1	10.4652	21.1746	8.30328	10.8378	5.07402	5.90731	8.28627	7.39655	8.07699	6.00948	5.93006	9.40315	5.65762	7.32277	6.43021	5.47245	7.29225	17.9115	5.05337	8.9965	7.75856	8.43994	6.71332	7.66719	4.78441	8.87167	5.92084	10.454	6.87009	6.45276
Sppl2a	4.83007	20.2696	4.98036	9.5099	6.76535	6.63623	6.23041	6.95276	7.35904	7.60415	8.72168	12.5852	11.0388	12.0097	9.66468	7.60696	4.69981	20.9324	5.04027	7.79901	5.77065	11.0652	5.54859	5.42229	5.76931	10.359	8.06294	10.1727	5.38266	4.92074
Gypc	6.39298	4.77419	5.99011	3.96913	7.42597	8.74201	7.1955	9.52369	6.21544	5.81977	6.10132	16.6627	7.01602	8.30207	4.44014	6.30254	7.61019	10.1881	4.28903	4.69783	24.342	4.19877	5.27782	7.36068	5.23527	3.99967	3.34782	3.7861	7.51518	4.87501
Set	10.1471	3.19788	5.6723	12.1693	7.74434	8.37249	9.72716	8.26883	10.595	11.1422	8.1565	9.97477	9.53264	10.8599	10.8946	10.4047	6.76235	20.4831	8.92311	9.00088	5.53807	12.0916	12.0556	19.6558	11.845	10.4375	13.789	12.3189	9.01493	8.93142
Ensa	11.3173	9.06191	13.3601	10.4158	13.5466	13.9052	11.406	9.65122	11.595	10.3884	9.63367	11.6372	8.36012	9.58343	8.25565	9.91277	9.61159	6.77352	10.478	8.6412	14.3805	11.9813	24.7129	9.5365	9.6695	7.92082	7.38758	23.5041	9.0437	9.89179
Kmt2e	6.30266	3.49202	4.83151	8.32753	10.9957	8.07383	4.7581	7.73322	9.35906	23.4688	6.4567	3.62979	10.0188	10.2119	7.32598	10.3651	5.65363	20.0938	8.0059	7.50073	9.98783	9.30939	9.89806	9.04867	8.57079	12.4439	11.071	9.92174	6.26197	5.07166
Plpp1	7.82629	8.16062	10.4636	7.58536	20.7657	4.71775	8.76208	5.87643	5.38466	6.67094	6.76926	7.04998	5.93407	9.70523	8.32828	5.44609	19.9324	4.61695	8.1544	6.33834	8.84686	9.71654	7.99409	6.63972	11.7575	3.92552	6.95253	9.01307	9.55731	7.53203
Picalm	9.09075	3.52596	4.21198	10.6595	10.8285	5.55804	5.33715	7.1415	7.90263	6.11716	7.86107	6.40215	9.02264	5.11571	4.81297	6.91303	8.40097	6.21726	7.9928	6.66293	14.3147	10.5266	23.3763	6.97645	11.6349	7.91646	8.38198	9.98231	15.5604	7.44971
LOC500654	11.5608	9.04683	6.80676	4.00187	3.63737	7.93716	6.69724	7.56999	9.52316	7.88104	6.59371	6.56411	5.13332	4.89646	6.36726	4.38323	17.0465	12.5586	7.53856	6.03129	9.29886	11.2052	13.2203	7.1405	24.154	5.02902	9.66642	4.30533	5.8593	5.13111
LOC100910784	5.43482	4.03129	8.00961	10.0629	4.73575	5.3505	5.3955	6.83033	21.4925	8.49635	8.5076	25.7896	6.66331	8.37515	10.6089	7.40493	7.36155	8.86162	8.05831	8.39556	4.05481	5.13607	5.26922	7.04553	7.98423	10.5814	11.6925	8.06547	4.81974	8.64788
Msantd4	14.4942	5.16261	12.821	20.0712	14.7763	7.44109	7.20447	7.22821	7.52827	6.2351	7.06469	10.3082	6.37733	5.70523	9.72762	5.62177	5.80853	11.3391	5.38531	9.03597	4.50242	7.4984	9.23189	16.5907	8.95162	8.35699	5.92498	7.39911	7.22756	5.93141
Tmf1	23.2865	7.19523	12.6722	13.8756	10.2953	12.4575	8.93265	6.96296	11.8514	9.93719	7.52282	8.24086	8.2219	9.99756	10.6137	6.74174	7.86291	9.12264	8.25486	7.46126	11.2034	8.22364	5.38097	17.5447	10.2079	10.6861	10.1678	12.1804	11.1968	13.1662
Hba-a1	4.02899	6.89354	4.59014	5.34068	8.56812	10.863	10.6518	5.50915	3.53849	10.2551	5.63891	5.64475	5.37641	6.01705	4.82266	8.98166	7.7121	6.50822	8.73093	8.9307	8.89952	18.8944	8.6001	8.66445	7.3539	11.9641	9.22722	6.82363	16.037	5.31861
Mrpl20	7.40219	7.03684	10.8337	10.0847	23.4519	8.41805	10.5531	7.29963	6.3539	7.5939	5.91721	8.10748	9.77095	9.92935	7.79082	19.3161	6.81942	9.78159	5.50761	7.68935	9.86934	5.17848	7.67605	6.47567	12.1777	7.96444	3.81187	7.46402	7.83979	7.43599
Dffa	15.9707	3.28084	6.73032	3.16148	8.61986	6.74254	8.93265	5.85093	18.8822	6.05563	5.42911	9.58893	10.3143	9.50547	5.35528	5.02446	8.20124	7.06448	6.66503	8.11922	6.42451	4.20725	8.96972	8.88462	4.89384	4.15232	7.10169	2.71734	6.40989	4.48629
LOC100361025	10.7322	17.9466	15.3876	12.1439	13.3317	11.1515	10.1356	6.13659	11.8104	12.865	7.82682	6.80228	9.83768	9.72472	23.9971	8.60395	5.69847	8.5022	8.66105	7.92183	10.5715	6.21333	11.6645	8.11186	8.68898	14.3369	8.10852	12.7862	4.90192	5.11281
Sec13	9.31458	21.5706	15.3876	14.5086	12.1776	7.25886	7.10123	7.92706	8.32828	5.85566	5.53615	11.7516	9.73759	11.1864	6.21716	6.48261	5.70663	11.8141	6.26321	9.97905	21.7047	10.9338	7.24626	4.61068	11.3854	9.62188	3.81602	5.80679	9.93122	9.05947
Tagln2	13.7088	9.5333	9.48199	21.9412	14.3067	9.48106	8.92367	8.88096	8.75905	6.22484	7.37725	9.77947	9.78048	9.99756	7.30177	8.95531	6.13462	10.2694	10.2727	9.66761	10.3959	10.9677	5.1145	17.1217	8.34755	11.746	13.2918	7.24767	7.07964	9.58538
Atg9a	8.18364	6.79926	6.56136	5.2279	3.42645	10.7465	6.89475	6.61609	5.65133	28.4733	7.82254	9.67944	11.9301	13.106	11.8194	5.85894	5.37238	4.76243	8.15877	7.97008	6.34991	9.11005	6.30932	4.45094	7.9711	9.07231	5.86697	12.7775	14.2127	10.7287
Tspan7	13.1237	12.2258	12.0325	5.59534	10.1799	9.65317	10.3376	11.6916	11.9693	12.3266	8.12225	19.9448	10.2571	10.8015	9.47584	10.2422	10.1741	9.67462	4.82625	8.29906	9.922	8.44419	9.49406	9.80416	9.4769	8.9022	23.7123	8.46788	8.41914	9.30642
Psmd8	4.4688	5.65285	4.18785	6.19562	6.35545	5.49729	6.57156	5.84582	7.05134	6.77862	5.69457	6.13539	6.38687	5.56394	8.6188	4.79168	18.4446	10.1924	5.20187	7.90867	25.7288	13.1434	14.8836	4.74019	9.6695	5.40849	4.885	5.57313	6.66053	9.12349
Il6st	13.4732	6.79926	6.89928	17.2808	11.0554	7.48158	7.92717	7.1517	4.7744	7.22471	5.98572	5.41134	9.79478	11.9025	11.9114	8.33165	5.50689	20.2221	9.66124	8.76402	10.4047	12.3249	10.0055	5.96625	9.06105	12.1517	7.13069	9.84385	6.23731	8.25916
Ntan1	4.33529	6.69744	4.73898	6.37753	3.30309	5.88706	3.28578	7.167	6.02057	7.07089	7.51426	5.89245	6.18668	5.73934	4.50308	6.28497	5.65771	4.39016	7.21099	4.51799	7.0301	12.0662	3.71339	6.57928	4.55241	6.33753	3.78287	5.89766	14.2661	4.81556
LOC100911615	20.8243	7.98338	9.87221	9.74274	13.1009	4.72281	9.193	8.39126	8.29751	5.89668	9.14556	10.6845	7.37826	9.51035	11.0931	10.207	7.77324	20.727	10.6483	10.5493	7.36361	10.5987	8.52273	7.58948	12.8037	8.78443	6.91524	8.37701	10.3339	9.80947
Eif4h	10.7597	11.1813	12.5756	9.18247	6.96434	5.53273	8.25934	8.37085	8.33854	8.88091	5.38629	10.9037	5.89594	11.123	12.0131	9.53945	6.19169	10.0426	9.99318	9.40882	10.0229	14.3734	26.1398	4.8697	12.4316	5.19477	10.4785	4.29235	8.08221	20.0397
Dctn1	11.388	12.1127	12.5837	9.04423	9.78589	10.4023	11.0469	7.1415	9.53855	12.3266	8.46906	10.0843	9.75189	8.89159	8.83185	9.31106	9.04908	20.7784	8.97989	9.35618	4.93687	8.19396	9.12874	8.74215	9.49003	10.1802	7.1887	13.2968	18.9955	11.6662
Dirc2	10.257	9.28063	10.3228	18.2376	9.99681	10.1695	8.93265	10.2685	11.8514	8.0041	7.17601	6.61651	9.13227	5.2911	8.93838	10.7824	7.76509	18.9171	11.0807	7.33405	10.5715	11.5233	11.4238	7.89168	9.00415	9.53464	8.31154	13.4439	6.73449	8.89483
Ciapin1	5.82358	3.91061	3.68096	4.34749	4.01146	6.73241	6.54911	5.32041	5.56415	5.5275	18.5566	5.06837	6.53939	4.58952	5.2536	5.23967	6.92947	7.29982	5.3591	3.59246	7.41188	4.78405	6.37808	7.85715	7.83102	5.41721	4.87257	4.54332	18.2394	4.8933
Khdrbs1	12.083	12.4521	7.19698	21.5846	10.6694	9.53674	6.50872	7.25882	9.03598	10.1525	19.4043	6.36404	8.36012	10.2314	10.2602	9.54384	9.0287	5.62249	7.66522	4.03548	12.7086	6.13699	9.96253	9.06594	9.07418	13.2464	4.89743	10.6054	8.9533	9.06404
Etf1	14.0033	10.7928	13.69	13.5009	8.27761	6.01868	9.04038	6.23351	7.79494	8.65017	6.07135	9.55559	10.9864	6.92326	12.5021	10.1236	7.89145	18.3009	4.62971	5.8032	5.26599	9.55537	10.315	8.93211	6.81549	24.7918	13.1758	11.4059	9.07246	9.19209
Golga7	9.45988	8.75645	13.0986	7.53443	13.674	6.3882	7.5142	8.45247	6.33852	8.13742	7.39866	8.16464	20.3522	8.52618	6.58515	10.0006	5.91859	10.2822	6.84411	7.22878	7.49526	11.4427	7.31073	7.02394	5.29656	9.28167	21.1932	12.0203	10.4859	11.4101
Hn1	12.9902	10.5439	13.3601	21.279	10.2953	11.4805	8.18303	9.28394	12.7899	9.08601	8.97858	10.4988	8.86059	9.23264	9.28216	10.4837	9.65235	8.76321	7.92291	9.72464	11.7563	10.1703	14.4323	8.94938	24.3773	11.432	9.34738	9.29	9.12176	9.44361
Slc16a1	21.2405	10.4308	11.8796	11.1579	7.60903	8.96474	8.54213	7.10579	8.39495	7.22984	8.833	11.2276	11.4058	9.72472	9.48068	17.3441	6.45664	7.69348	9.84905	7.58408	8.645	4.72891	9.37372	9.27316	8.15495	9.01997	8.17896	9.80924	6.68518	9.89179
Ngly1	9.60125	4.05014	9.80785	5.64628	5.57545	8.05358	17.3805	7.79443	7.46673	7.18882	5.54471	5.31607	6.23434	6.08039	7.89734	9.89959	9.42001	7.97161	11.3734	5.80759	24.1314	12.0153	9.23619	11.1295	12.9919	8.48348	4.08533	3.40532	7.75761	6.66769
Nfic	11.71	11.3472	4.6183	6.2793	7.58516	7.09687	6.40547	11.2887	8.35392	6.95808	12.9562	9.95572	11.2104	11.5274	9.18532	4.68188	6.70121	6.94039	5.85265	4.47851	10.8216	9.96253	11.7419	5.35322	4.11906	4.44456	5.19575	4.66447	19.8172	8.11739
Trip10	14.4902	10.1895	14.7279	10.4158	15.5205	10.9946	12.0479	7.98827	11.4257	9.13216	8.3449	4.6206	8.34582	6.31425	7.32598	10.8878	7.92406	10.2993	22.4322	6.93489	4.92809	12.2104	12.6659	8.30613	11.5167	7.9688	7.38758	13.2016	16.8424	4.75153
Slc25a20	5.84321	10.8871	12.1049	3.32883	7.88761	6.31227	6.37405	8.68712	9.22059	8.67068	6.83776	5.38752	7.09705	4.99391	6.35758	9.04754	19.3495	11.6558	6.40734	6.9963	10.6241	7.15063	6.62736	5.81515	6.58349	9.19879	8.04223	13.2968	9.78741	11.2317
Apopt1	10.1235	8.09651	7.84064	15.7164	10.0645	6.63117	7.59051	7.13129	6.3898	7.15806	6.26831	8.42664	6.66808	8.17539	9.65984	9.10025	15.3508	11.4889	8.27233	6.5445	14.9028	10.2085	6.24485	7.6931	12.7993	5.53934	9.23965	9.515	4.97999	8.99544
Ube2r2	8.11688	7.3423	3.58039	5.12967	7.80404	5.32519	8.63639	23.4955	8.30264	6.1992	9.85203	8.34566	6.03892	6.70889	10.1876	12.7851	7.05991	8.84879	8.33347	10.0975	11.8046	4.05033	7.56001	9.93799	10.6938	3.59839	11.1663	11.1419	7.90142	6.85062
Pum1	11.3173	7.6289	9.38946	4.46027	18.5212	7.88148	7.74762	6.02946	8.29751	8.14767	6.73928	6.25448	8.11704	7.8587	9.70341	7.21607	5.06259	7.76622	5.35474	6.39536	25.4435	13.9195	8.21329	7.68878	10.2342	6.41604	8.42341	4.17985	5.64152	4.82013
Wwp1	6.27517	8.72628	12.8492	11.1579	14.5017	10.1391	11.4553	6.40184	12.4616	9.98846	9.00855	8.49809	9.76142	9.73446	11.1899	9.37255	9.40778	9.29379	18.4358	9.3825	11.3263	7.30331	9.73904	6.54474	7.95797	24.3862	11.3486	12.1112	7.97127	10.2988
Ctdsp1	5.12066	10.6722	4.25221	5.86456	6.33556	7.01588	6.19001	5.69279	8.82059	6.13767	6.94908	8.37424	5.15239	6.34348	9.63078	18.5606	5.23379	4.97209	9.43412	10.4659	9.20232	8.40602	8.49265	4.89129	4.10155	9.12901	5.92912	4.04571	5.34157	23.8171
Osbp	4.17036	4.78927	3.55625	8.26568	6.34352	9.86577	8.74412	6.31002	5.87185	7.37341	7.55708	7.25481	7.49265	4.76005	6.43505	5.74475	5.69032	5.54119	8.29416	3.35559	5.99006	3.5329	7.40098	6.79082	8.77215	4.06945	7.59889	12.5525	5.57989	17.3918
Txndc15	4.20177	3.59761	4.86772	4.27109	8.32139	10.3467	5.94313	6.53957	6.60006	8.15793	7.13319	6.21637	5.59566	5.83191	5.68454	10.8175	7.65911	7.05592	7.26777	7.27703	5.75309	21.8506	6.16319	6.70879	10.3305	18.7422	11.3776	9.74	7.19058	11.9177
Sdf4	10.5398	8.56413	10.9141	8.99693	23.5633	7.07156	5.36857	8.126	6.03595	6.13255	8.97858	7.21671	7.68807	10.0024	10.6137	5.64813	6.71344	4.6255	6.31999	20.4143	6.82823	5.11062	5.69042	4.11853	5.01203	14.1101	7.4373	8.12605	5.68261	6.81404
Mrpl30	3.46352	21.2086	9.132	7.59628	12.3249	7.58282	7.29425	6.64669	7.34365	7.87078	21.6779	10.4797	7.55938	11.8197	12.4827	9.12221	5.05444	9.08841	7.09306	6.87348	9.95272	7.26938	11.08	5.9792	7.83978	6.18923	4.91815	5.46496	9.55731	8.79422
Riok3	13.8737	9.5333	13.4969	21.5664	14.4261	13.7078	9.39948	7.20271	11.9898	11.3934	7.24452	8.56954	10.5288	11.7223	11.9937	9.53945	8.55994	20.9324	9.53021	8.48329	10.0537	10.5902	7.13451	8.89325	9.61697	11.746	9.10292	13.141	8.94097	9.7363
Eif4g1	11.1877	8.31147	23.8478	4.99506	4.93473	8.26619	5.92069	7.18741	5.8821	6.33765	17.7987	9.71755	7.98358	8.49208	8.75922	8.43705	7.92406	10.7144	10.0238	6.26377	9.26814	3.74072	11.1831	4.87834	4.26351	7.72454	6.96081	9.34192	9.49978	8.99087
Ivns1abp	11.761	13.7079	15.1543	9.61177	22.9624	10.0936	8.64986	7.00887	6.75391	8.16305	7.33015	9.37457	9.87104	10.2607	10.7687	9.31546	6.50555	6.80347	10.3819	10.8256	6.49911	10.2467	10.792	22.7814	8.07178	8.47912	7.76877	9.10827	8.5835	12.3567
Mapt	12.6014	6.81057	10.4234	10.3212	24.2518	12.9536	9.76307	11.7886	8.677	10.1525	8.72168	9.94619	10.0331	10.1681	9.85836	9.43404	9.90915	10.5047	20.3139	5.91725	12.4672	10.4884	8.7892	11.1295	11.2322	8.30465	12.6372	11.2544	8.6287	8.65703
Snta1	5.94138	5.23803	3.78153	4.7695	5.20932	6.75266	6.24388	7.75362	5.85133	6.13255	7.784	5.9258	5.56706	7.37637	8.47838	21.758	8.97163	4.55276	5.14072	6.8998	8.24566	3.93157	5.9354	7.84419	5.6161	5.25147	7.45801	5.01496	5.78123	21.7135
Arid1b	5.85499	8.24736	5.57977	6.24656	7.91149	5.69471	3.84239	9.0748	9.22059	9.26035	5.33491	9.97954	10.4287	11.1084	4.56603	4.81364	17.0261	6.66226	5.51197	5.9962	9.89129	12.4097	3.51138	6.85558	8.25125	6.05402	5.2289	5.43467	18.5312	6.19666
Mlf2	12.5975	9.45033	12.1089	20.9189	8.68751	7.58788	8.28178	7.21801	8.45136	7.58877	5.7802	12.8138	11.258	6.95249	9.20469	7.99785	6.61153	8.90441	6.10161	7.87796	6.85456	7.7147	9.99691	19.0428	6.91179	11.1877	10.7437	7.22171	4.59375	5.55184
Ltn1	12.9312	5.87535	5.11714	17.7428	11.1151	7.48664	6.70173	9.11561	10.477	7.65543	6.97906	9.97954	8.86059	8.41412	11.3352	10.0753	8.18901	21.0009	10.05	8.92193	8.66255	14.3734	11.7505	5.74608	13.3289	12.156	10.3584	10.7266	7.91786	9.69971
Sf3b6	6.33407	17.758	4.64646	3.1251	6.18433	6.74254	6.01495	6.25901	5.21543	9.34239	5.71597	6.43549	4.90454	5.97807	6.3721	6.89107	4.59791	5.36575	4.60787	5.65845	23.7891	7.66805	11.0026	5.97488	5.20901	5.70072	4.95544	9.16884	8.29998	6.57623
Mettl9	8.46245	14.6205	14.1606	12.5477	11.4931	7.49677	6.29774	7.05988	6.52826	9.34752	4.96241	7.55015	21.8583	5.99756	10.5943	7.12384	8.3439	8.98999	10.1111	5.40404	8.71521	6.25574	6.33081	7.2398	6.95118	13.7873	22.0177	7.30825	5.46895	9.61282
Pde4d	23.2865	10.4798	14.9049	13.8756	10.2953	11.6678	8.192	9.87567	8.33854	9.60902	8.28495	8.28373	9.53264	9.676	6.89988	9.99183	10.1333	7.56939	8.33347	8.63681	25.4435	14.5006	10.186	9.44153	11.4467	13.6172	11.2575	9.6102	9.38063	11.3643
Anxa1	12.1184	11.4565	14.398	8.78593	22.4291	7.64357	7.00697	10.5286	10.1796	7.38367	8.33205	10.0653	10.6813	11.0499	8.7689	20.3131	8.82489	5.03628	8.48197	9.81236	11.5369	11.8159	5.96119	9.41994	9.54693	8.54018	12.8734	5.33515	8.07399	9.19666
LOC688682	5.02642	11.5961	12.0164	6.15924	9.02578	7.23355	9.93814	24.0821	10.1591	5.94795	8.37487	8.92204	6.54415	8.37515	9.54363	10.0665	7.06399	5.47701	21.847	9.56234	9.32519	9.72926	9.90666	4.15738	8.89471	6.63849	10.2962	12.2799	9.40939	6.88721
Ppm1a	13.9248	13.4665	11.5015	11.7473	15.3693	7.90173	6.33814	7.30983	6.03082	5.98897	16.4586	6.66414	8.16947	9.19366	7.86345	4.86196	7.20665	8.24118	7.47305	8.27713	11.6203	8.45267	11.0886	7.61539	11.9763	10.0057	13.4493	8.23855	7.09608	22.3583
Papd5	9.72298	12.2258	14.048	18.8706	11.8036	12.3512	9.64188	7.12619	12.5847	10.6191	7.00903	9.76042	9.48497	8.94031	10.207	8.86308	7.26779	7.53944	8.87506	8.3517	7.96042	11.2476	23.0453	7.7708	10.0372	11.7198	12.4673	8.41595	8.94097	8.19971
Tnmd	21.3937	10.0047	9.98485	10.4558	5.95351	9.87083	8.78901	8.53919	6.13339	11.9267	10.0747	10.7179	5.62426	12.1608	10.9139	20.1901	7.96482	5.52407	10.5173	10.773	5.60828	11.7099	12.0814	7.31319	9.46376	9.91411	8.3364	12.9939	8.41914	10.3583
Nploc4	12.0752	9.42394	8.69752	12.5222	14.3107	8.24088	6.25286	8.74323	8.81033	7.32726	9.60369	9.40315	6.14855	8.40438	8.79311	18.5606	7.92406	8.12565	9.28125	6.02252	9.86934	4.71619	10.7104	6.49294	9.13984	14.3761	12.1731	6.71113	18.5106	10.715
Desi2	13.4732	12.8745	9.5182	18.8706	14.5296	11.0705	5.82193	7.6516	9.36419	9.98846	6.80779	10.2892	10.1618	9.18879	5.38917	9.6756	5.97565	8.51503	8.90564	22.0592	8.41242	8.16427	10.0958	8.66445	4.59619	13.5997	11.3486	7.45537	8.09043	5.50611
Brcc3	8.92975	9.03174	10.9262	20.1476	8.21394	11.1718	8.60048	10.5184	7.95392	9.6603	8.28067	9.44126	8.36012	10.4702	9.563	20.6073	6.8561	7.72343	7.37259	9.75534	6.28408	12.855	10.1344	9.21704	7.93608	7.42795	10.9343	8.62797	8.04523	9.07776
Aprt	10.2885	13.3572	15.4158	20.7843	15.5205	10.7212	7.78801	6.17739	10.595	8.38354	9.6251	11.0323	9.86628	9.70523	9.63563	5.3319	6.86425	7.03453	8.24175	9.32986	24.4912	8.45267	11.2089	8.3493	7.55963	14.3412	12.6123	11.7823	6.82078	10.0656
Cct8	8.24647	14.0209	8.76994	11.7255	12.3527	5.69471	4.54712	6.41714	5.93339	5.70696	19.9395	8.35995	7.06368	7.75639	6.38663	7.88366	6.04902	7.40252	8.49944	8.96579	5.91546	4.42355	8.60869	5.86264	4.63558	23.7974	5.74267	4.03706	4.90603	5.05794
Gid4	11.9613	22.4606	9.78371	12.9297	13.8809	6.66154	6.10473	5.97335	6.20518	6.6453	7.10322	8.0789	10.5288	9.54445	9.59689	7.83535	21.6281	5.72946	8.25922	6.94805	8.60551	10.217	10.1559	5.96193	7.65593	9.54337	11.0213	6.73709	9.24914	9.95581
Xpo1	3.16507	6.29771	6.21539	6.26111	3.74482	5.82632	5.93864	7.07008	6.86673	5.789	5.50189	6.75941	6.38687	5.58343	6.28495	5.20453	8.52733	4.2404	7.55603	4.84258	6.05589	7.60019	6.97549	4.4898	22.355	5.34306	4.34222	3.89427	15.7166	6.56708
Lage3	5.43089	5.2946	5.13725	7.90915	5.73065	6.51475	7.43789	6.40184	7.06673	5.70183	6.52092	8.31231	7.53555	8.47746	10.0181	5.99949	5.08705	21.095	9.6263	10.9441	12.4497	12.3121	8.81929	4.55024	8.8772	9.9272	9.32252	19.1858	7.59736	4.50001
Mrpl35	5.26596	9.83875	3.70912	6.47939	9.97293	5.35556	7.59051	7.37104	7.03596	4.28663	7.62558	6.77846	8.12181	8.34104	9.15142	4.69945	14.9351	17.903	5.05337	7.60162	10.1809	10.586	6.86804	5.21939	9.80082	10.6163	10.0227	4.46543	5.19365	3.32927
Rassf8	11.6314	6.52774	13.0946	7.23611	15.7474	8.62052	8.67679	8.04949	5.40005	5.76336	17.8972	7.15478	9.46114	5.03288	8.73985	8.12961	7.06399	6.67082	7.81372	8.43942	6.97744	9.99222	7.86945	7.78375	9.63448	14.2583	7.60303	9.34625	5.11558	19.3628
Naa15	7.20584	9.00912	16.683	9.42623	6.53454	5.79595	8.99101	12.2426	11.7847	11.4908	7.89104	9.83187	8.68423	12.6382	8.64785	5.90726	7.11698	4.53992	7.04939	6.84716	4.81838	5.98006	9.59291	22.8418	2.22806	4.54924	9.75757	8.68422	5.44019	4.31708
Tspan13	14.0033	8.2021	24.1978	13.5009	12.7069	7.39047	5.36857	8.47287	6.8257	8.75272	7.4586	8.45998	9.9902	10.0122	6.73041	5.20453	8.55179	8.89158	8.89253	5.57949	9.15843	6.9216	10.9382	18.2657	12.5104	12.9237	12.604	12.215	10.8804	11.6799
Ash1l	9.26353	4.24624	8.95499	17.3863	4.87901	10.129	7.42891	6.84563	8.69238	5.96846	5.13795	8.21228	5.10473	11.0548	12.2406	10.0928	6.15093	10.509	6.89652	9.55357	7.58741	25.2223	13.2246	9.17818	8.90784	4.9069	9.05734	7.26498	7.75761	6.13263
Fkbp4	10.0371	10.1216	12.0647	6.92687	4.34973	5.96299	6.56258	7.35574	6.80006	6.0864	4.17459	8.39329	7.41162	9.40316	8.12007	17.8316	8.17678	4.84801	7.34202	8.30345	6.15243	7.27362	4.0959	4.97331	7.13065	7.15753	11.3155	6.84959	21.1115	7.48629
Ttll7	10.8264	13.7079	8.47626	21.5846	10.7131	7.72962	5.56159	8.87076	6.02569	5.90181	5.67744	6.75941	6.07229	5.57369	5.30202	6.28058	7.24741	4.83945	4.52488	8.66752	12.3839	9.9286	11.282	22.8418	5.93127	4.78041	12.5916	4.51303	5.21831	6.38416
Dcaf8	13.4614	9.89532	6.13493	10.6741	12.8979	9.35451	4.97805	8.63611	10.595	9.87566	5.96431	11.1561	11.1532	11.3959	6.65778	21.758	4.67536	8.9472	11.1506	6.4173	12.9324	11.9559	11.5442	5.35322	8.34317	9.66113	9.90673	11.1679	16.0329	7.20276
Cebpg	11.7296	11.6526	8.92683	16.5932	10.546	9.37982	7.84188	6.28962	8.82059	8.05538	5.89152	8.06461	9.82815	10.134	8.67206	8.70497	8.37243	21.5914	8.98425	8.25081	8.7196	10.094	12.6659	9.17818	6.76734	9.23805	5.98713	8.2948	8.70266	7.32623
Atp6v0d1	15.1421	9.5333	12.1492	13.9047	24.2518	5.40112	8.06632	17.109	6.28211	5.77362	6.56374	11.1656	6.01986	12.3508	9.7131	7.44007	5.17265	3.89809	7.12364	5.72425	8.4212	6.19212	8.35082	6.12167	6.61851	11.6021	8.49385	6.42122	5.83053	4.42226
Map2k1	3.81301	17.8938	8.28316	3.67445	7.31056	6.30215	5.64687	7.92196	8.11802	8.26561	6.52092	9.04113	6.34874	5.2911	8.10071	10.1895	4.74873	7.97161	10.2509	7.37353	11.1376	22.5037	8.56571	5.2971	12.4316	6.41604	7.61132	6.79767	7.4782	5.56099
Dtnbp1	12.3618	8.23982	14.7842	10.6777	11.0037	11.1768	12.0479	8.20762	11.8514	9.81412	6.65365	11.2514	11.1055	13.4714	10.4007	10.5672	9.42001	9.42216	18.4664	9.18511	14.227	12.503	8.25197	8.41405	11.044	13.9836	12.8319	6.87988	22.0114	11.5473
Tmx4	11.8003	9.67283	9.23257	11.9474	6.39923	10.6352	10.4184	10.4725	9.63085	14.0238	9.37677	9.32694	7.56891	11.2887	10.6815	8.75328	9.62382	10.6245	9.48653	10.2993	11.1463	5.49657	11.0843	10.0373	21.9391	10.9042	12.7615	22.3964	9.97642	10.9345
Dnaja1	10.2885	5.34362	22.476	13.2498	11.8036	7.01082	7.37954	3.84621	5.73338	7.29137	8.34918	7.66924	10.4287	8.28745	9.31121	7.11067	10.3575	5.13897	5.16693	5.38649	7.26268	6.84102	5.7377	9.31633	15.894	6.307	4.53282	7.45104	7.79048	4.6372
Medag	18.8412	6.4938	4.32865	6.70131	3.25931	8.13964	9.3142	6.41204	6.24621	6.46071	5.33063	5.09218	10.1332	7.29354	8.24597	8.29651	6.72159	6.79491	7.23719	9.65884	7.88582	5.86555	9.80781	5.12441	4.27226	4.00403	4.52039	5.23563	22.0114	10.2119
Vamp3	6.01207	22.4606	9.78371	12.7441	12.8144	9.74934	8.72168	7.30983	7.54878	6.59403	8.38343	8.61241	7.38303	8.79415	7.02093	7.85292	7.49606	8.27114	8.87506	10.0975	7.43821	8.63928	24.0081	8.97096	10.6938	9.4256	10.5241	10.8131	7.7987	9.08233
Cab39	9.05148	12.7953	23.7392	12.1111	6.77331	7.88148	7.68028	8.97788	5.15902	5.83002	9.4153	6.26401	12.3591	9.74421	9.60657	18.9252	6.21615	4.49714	5.90069	8.8342	6.17876	12.2528	8.69035	8.08595	8.1243	13.7873	6.80337	6.63757	6.11816	7.60977
Phf20l1	9.29888	10.7325	24.238	9.84096	7.60505	11.6628	8.69475	11.2326	12.2565	9.20907	9.85203	10.0558	19.5038	12.1803	10.4491	9.97865	9.35479	8.64768	9.80537	9.25968	9.42612	7.88435	11.527	8.66876	11.6393	7.39742	12.1358	11.077	10.5311	10.2393
Hcfc1r1	8.27396	8.85073	8.35155	6.86867	11.127	6.75772	17.2997	9.87057	7.12827	7.69132	5.51474	10.7084	9.76619	3.03045	9.90678	4.7302	6.57892	8.26686	9.09344	7.34282	7.52598	10.6072	11.7247	5.02512	8.96913	8.7888	5.12117	6.17458	19.5543	6.57623
Ttc3	11.5608	8.93747	12.0003	8.42576	18.4535	7.14749	8.92816	7.04968	7.65648	5.70183	6.1056	7.2834	6.73481	6.0073	7.91187	5.82381	20.3074	2.75134	6.88778	8.4482	6.6527	8.0031	7.74052	6.2555	5.0558	8.14327	13.4493	6.40824	5.90449	4.468
Yy1	13.8776	7.7722	11.1515	10.7468	5.69086	8.40792	10.3421	5.44794	27.149	10.7781	4.6156	9.87474	9.55647	9.70523	9.81962	9.10025	8.41727	21.6898	9.49964	10.2554	11.1069	10.815	10.792	7.30887	6.95118	9.02869	8.37784	11.8689	9.84082	7.23477
Ptprb	7.00164	10.725	9.32912	10.4813	10.8325	7.0007	6.44138	6.61098	8.33341	7.44007	8.40056	9.04113	9.78048	10.5091	10.6476	4.29539	16.2231	7.05592	8.52565	6.834	6.68781	8.0031	8.01128	8.33635	9.40248	12.5224	6.34346	11.9338	21.1115	11.7211
Mprip	7.08018	3.82388	4.25221	3.2015	6.8927	10.9187	9.32766	11.2479	12.5847	5.86591	5.96431	5.69239	9.07507	5.42752	8.28954	21.758	5.31531	5.48556	11.1506	5.74179	4.30056	4.02488	7.19468	4.30416	9.1486	7.27093	5.61008	8.17364	6.88241	23.0808
Sumo3	23.1372	10.0499	12.8572	12.253	7.48567	12.2601	11.3162	8.09029	10.6206	14.0238	8.50332	12.8138	11.1103	13.106	10.9769	21.332	7.00284	7.44103	6.69997	10.1326	8.78104	9.95829	7.03136	9.13069	11.4467	13.3293	13.6855	13.9761	9.40528	10.1067
Usp24	12.4561	9.80481	11.2923	6.82865	10.16	4.77849	9.49375	8.78404	9.52316	8.58351	8.95717	9.60322	8.65563	9.90499	10.7541	8.42827	4.23513	8.06575	7.40753	8.45258	8.37292	7.76984	20.5182	7.6931	8.8772	11.6675	12.8651	12.9809	9.30256	20.3095
Nars	8.19149	6.08653	11.8032	11.9074	4.26615	9.75947	5.46732	6.7028	6.92827	7.97846	5.73738	7.47394	5.81491	8.35566	6.5561	8.63909	5.17672	17.0386	8.46014	10.4659	4.67357	3.93581	4.21194	5.54749	7.09563	4.03456	5.77167	5.69862	21.1115	5.53355
Mnat1	8.60382	11.5961	12.0446	18.2376	10.6694	13.2522	9.93814	9.51859	11.7693	14.0238	7.98952	9.58417	8.47928	10.3483	10.483	10.2861	6.70121	10.0683	10.0543	10.2247	12.0108	12.2104	14.0326	22.5181	14.3445	12.8888	13.3913	7.30392	7.1084	10.468
Stub1	6.48722	10.1593	9.21648	3.29972	21.1835	7.38034	6.02393	6.27942	7.01032	8.4143	4.33301	7.18813	6.22481	5.89037	7.81018	4.65553	9.54637	8.74609	7.82683	4.97856	5.24405	7.55354	8.5958	21.0502	10.0416	7.94699	7.23842	9.06067	4.67593	5.32775
Hsph1	12.1066	7.76089	4.99645	17.761	10.7649	7.80049	8.26831	8.1311	5.78979	8.90655	6.10988	9.30312	23.7601	11.6151	10.1973	5.88969	7.39823	8.49792	6.95766	8.63681	8.52652	12.4521	10.9811	4.93446	9.73516	7.57625	10.4288	9.77462	5.88806	7.52745
Fbp2	9.76225	9.93303	4.87174	7.48714	7.68863	6.55524	6.48627	7.1772	6.89237	5.7326	7.27877	7.46441	4.41361	4.56029	4.55634	7.9715	5.29493	7.0602	8.08015	8.60611	4.69112	19.0174	8.54852	5.00785	10.2867	5.03775	6.16944	4.21447	7.63845	20.0991
LOC100910660	7.48858	12.7236	13.8388	8.97874	8.98996	5.84151	4.98253	7.74852	3.75901	5.80438	10.0533	5.53519	7.99788	9.79293	5.35528	20.3131	5.24602	4.79666	10.312	10.0712	11.5983	12.503	8.82359	6.55769	5.33157	5.12934	6.10729	6.13564	6.93583	8.17227
Mcrip2	4.40204	4.22738	6.57745	6.16652	7.46975	7.81567	7.97654	6.95276	7.17955	10.3833	5.48905	9.5794	8.06938	6.92326	6.17842	3.71125	4.9077	13.102	7.14111	4.59694	7.84194	10.217	7.08724	7.11028	4.67498	6.47274	14.3442	9.26404	4.45816	7.06556
Cul4a	12.9823	7.71186	15.4158	12.3585	12.8979	6.3882	17.605	7.78423	7.21032	5.83002	8.58895	6.64985	7.69284	7.78562	7.45187	9.10464	5.68217	5.63105	9.37297	5.08822	6.28847	25.3241	12.1845	6.9117	6.13262	5.5786	5.12946	3.94619	4.51979	5.78964
Zfp770	11.9692	10.016	14.2371	12.1439	14.5296	6.34264	8.04387	7.98827	6.80006	10.3935	7.50141	9.60322	7.77863	11.7515	11.6741	9.84689	7.1129	6.53818	8.22865	6.30764	9.72014	8.85982	12.5671	8.65149	23.3355	8.03422	13.1758	22.4483	9.06835	9.55337
Ccdc181	10.4063	12.7651	11.067	21.1844	10.6893	11.5565	7.30323	8.03418	10.2309	9.13216	7.41578	9.30312	20.1425	9.73934	6.45926	9.91277	7.66318	4.74103	8.62174	7.40423	8.83809	9.61051	9.88087	7.80102	9.35433	12.3261	7.99251	11.6309	9.47102	8.28203
Pxmp2	14.1132	12.6746	13.6014	8.21475	7.48567	8.22569	7.49176	9.70223	13.2411	7.58364	8.22929	9.83663	6.37733	11.922	9.96488	8.17353	8.26645	8.14705	9.61319	21.1512	7.73662	5.39054	8.40239	8.8285	7.96672	12.2825	21.1932	13.141	6.06063	9.02746
Trak2	22.5914	12.7651	13.9796	14.2321	10.1918	7.22848	7.06981	8.6106	6.65134	6.84527	6.65365	11.5896	25.9049	7.23995	8.25565	5.41535	5.33162	9.02422	5.88322	10.5361	7.16614	8.76652	9.2018	7.09733	5.34033	8.57944	13.0888	7.19575	4.09247	5.35062
Atp9a	12.7388	4.23115	13.2313	5.97006	8.54822	8.07383	6.06433	9.78895	7.07699	5.04038	6.18267	11.4658	12.2399	11.4835	12.2503	21.758	7.53275	5.22455	10.5304	7.74637	4.22596	12.0577	12.5327	4.38187	11.4467	12.0339	12.8651	13.0025	8.29587	25.0061
Socs6	10.4612	11.8412	13.2313	19.38	12.0543	11.5008	8.22343	9.01359	12.4616	12.2292	7.09038	11.1895	9.68992	11.5664	9.53879	9.3989	7.13736	7.87748	8.8969	7.89551	8.9478	13.7796	7.91243	8.69467	24.3773	8.44422	13.1924	8.26451	7.16182	9.89179
Clcn3	21.4565	9.5333	5.74873	14.1412	11.2663	9.7544	8.18303	7.52918	7.94366	9.87053	5.23643	10.7512	11.0722	10.1876	9.36932	9.47357	5.58842	10.8043	8.48197	8.30783	14.9028	24.2002	13.1258	6.7347	9.6695	8.76263	6.45947	8.3597	11.3365	9.06404
Fgf13	5.93353	5.94323	6.32401	3.83088	6.1326	10.0682	8.34013	23.6588	9.90778	6.71709	9.80921	9.86521	8.6747	7.77101	12.5747	6.35963	7.83438	11.2749	21.6199	5.33824	8.9083	10.0389	3.70479	7.28729	7.01684	4.2919	9.32252	8.28182	9.16285	7.22105
Anp32e	12.1655	8.24736	11.7308	8.46941	10.4584	4.738	10.6518	8.33515	7.79494	8.57839	4.66698	6.90708	9.46114	10.0024	10.1876	9.60972	9.64827	8.92153	20.3926	8.78595	6.77996	7.92252	9.04708	10.033	10.6325	5.91881	11.7671	19.6964	5.80177	8.07166
Eif3k	7.23333	11.2341	7.07629	6.53396	23.4519	6.70204	5.68278	8.1005	5.63082	8.8604	5.76735	5.74955	8.09321	11.1425	11.2383	4.8356	4.68758	9.23389	5.58622	5.66284	12.6866	9.39845	7.00128	6.96782	9.15297	6.99614	3.94032	4.56495	7.56038	19.1845
Ghr	12.5621	21.9552	14.7158	12.4058	8.71139	13.9052	9.45335	12.5231	12.2565	12.9419	8.55898	5.70191	10.5383	9.72959	10.1198	6.66268	7.11698	9.27668	7.48178	7.40862	9.36907	7.71894	10.7147	22.8418	5.9444	6.49455	13.1758	9.29433	4.6636	4.9619
LOC100361056	4.19785	10.4006	4.50163	8.32025	6.57035	7.7195	6.88128	9.13601	6.63596	8.77323	8.3449	7.69782	4.92361	7.67356	10.2941	8.10765	7.54905	5.58826	8.19371	7.74199	11.6905	7.4772	11.3293	22.8418	13.0969	7.03976	6.12386	7.19575	21.1115	10.9345
Ddt	23.2865	4.83076	6.47688	6.08284	8.15424	7.56257	6.35161	7.67711	6.14877	5.60954	6.58515	4.73016	6.15808	5.31547	6.82725	6.97891	5.37238	7.32977	6.6563	18.4799	8.0833	6.13699	8.94393	7.71036	4.00087	4.82839	7.52845	5.48227	3.03237	6.27897
Atp1b3	14.8868	21.8723	10.9825	14.1412	14.3107	6.91464	6.30672	7.23842	6.91288	6.46584	8.52044	7.57397	6.22958	9.2034	6.99672	8.55564	7.41046	5.58826	5.73472	19.8748	8.81615	6.47204	5.9354	8.66445	12.1733	8.88475	13.6855	11.4751	6.59479	6.14635
Ablim1	3.49886	8.09274	6.91135	3.29972	7.03597	8.62559	6.02393	6.96296	9.30777	5.16344	10.3658	9.54606	5.56706	5.19853	8.59459	6.90424	8.04227	7.72343	9.87089	11.1765	5.76626	4.92401	3.71768	5.63383	18.6868	7.83795	6.52162	11.6439	7.74939	25.0061
Ide	11.6314	7.82123	8.36362	5.42072	12.9178	6.26671	8.14263	6.6722	5.71287	6.18382	7.27449	11.218	10.3095	9.64189	4.87592	9.59215	19.9324	7.7106	4.25409	13.2294	8.57918	12.5115	8.81499	9.34223	7.94046	11.9248	3.48869	10.2636	9.10122	9.19209
Arpc3	11.5883	11.9128	9.35326	9.42259	24.415	7.01588	8.77106	7.12619	12.2104	9.42956	19.9395	11.3228	10.3143	11.9123	9.10785	10.5935	6.06125	5.24167	9.6263	6.71118	8.645	10.0601	10.0356	6.6095	11.6393	14.1101	8.52285	5.80679	6.68518	9.77746
Gltscr2	7.96766	2.92636	10.9141	9.05514	4.50891	9.64304	6.27979	7.06498	7.04622	7.29137	5.00094	6.81181	9.03694	7.08404	5.21002	7.19851	6.84795	4.3816	5.7653	7.88235	10.2687	10.1703	14.4323	7.42112	24.3773	10.4288	5.10874	7.13517	15.5522	5.39635
Araf	12.3383	10.2724	5.37058	5.65719	13.1964	8.13458	7.80597	7.94236	7.34878	7.7067	6.44813	7.07856	7.79293	5.11571	17.4264	4.19876	4.53269	2.58018	7.5604	7.96569	13.38	24.2002	6.04285	7.27002	7.99736	10.4419	4.95544	7.35152	5.55524	6.81404
Usp10	3.57347	8.40574	4.52175	18.2376	6.42709	8.94449	7.24039	5.68259	6.88724	6.87091	6.51236	7.15478	7.41639	6.61145	9.69373	5.72718	8.51102	6.81631	5.26738	5.01804	21.6301	8.49508	7.61588	7.01099	7.36265	7.49774	9.97717	7.30392	6.32771	5.57928
Nup153	9.00436	11.4528	12.6158	7.40346	7.3623	8.76732	17.385	7.09559	5.96928	9.90642	6.60227	11.7373	7.97882	11.0353	10.0569	9.49553	4.9933	5.15609	4.39385	8.84736	25.3689	11.6887	8.72903	9.14796	7.99736	5.50881	5.83382	7.3169	7.09608	6.12349
Copb2	10.6851	18.7461	6.12689	3.59441	7.03597	5.60866	6.18552	6.31002	6.91288	6.09153	18.4196	7.73593	7.13518	5.00365	7.34051	7.585	7.28818	4.59555	5.78713	7.65426	9.38224	6.81557	10.7877	6.90738	7.62529	6.08455	8.87918	9.22942	11.0776	11.0442
Cdh13	10.418	12.52	5.53954	12.7441	12.3726	10.4732	8.51071	7.95767	6.24108	9.16293	7.47144	10.8941	8.2648	10.1145	10.0617	6.79444	20.4175	9.7602	9.23758	8.3166	7.24074	11.9177	12.0986	6.08281	11.5299	12.0164	8.71345	9.74433	10.1819	23.9589
H1f0	14.1761	8.68857	10.4958	21.5664	5.4879	5.79595	8.16507	8.98808	7.59494	6.28124	7.70265	11.1942	9.04171	7.23995	10.2167	7.05357	5.14004	6.34563	9.00609	10.058	10.0229	24.2002	11.9525	6.49725	13.8017	12.5137	6.68321	6.5943	9.3231	11.4695
Spryd7	14.8868	22.4606	9.3613	13.9301	10.1281	11.6678	7.21345	9.63082	8.18982	8.5066	7.03472	7.95505	8.83675	9.91473	9.14658	7.76508	7.58981	8.81456	9.3555	20.8266	7.81122	5.30996	8.87946	9.07025	8.86407	8.57944	10.7934	9.25538	7.56449	8.38721
Mphosph8	11.4626	11.053	8.36765	7.41801	7.09566	5.9225	17.5825	9.17172	8.45648	6.37354	7.17601	7.58826	5.70528	11.1376	21.2807	9.91277	8.3439	5.42566	6.74802	6.29886	7.96042	12.3249	13.2031	4.39914	6.80235	8.95018	3.83673	7.48998	7.12895	8.73934
Map2k2	23.2865	13.3572	14.9049	9.37165	15.5165	5.61372	6.16757	6.96296	6.37954	6.72221	5.75023	7.68829	6.3678	9.84652	10.5169	6.29814	9.08576	5.01488	5.90069	8.09728	8.98729	6.48476	8.12303	20.9121	4.88071	11.3796	7.60303	4.30533	3.95687	4.72409
Idh1	3.64808	4.52907	7.84869	4.47482	7.12352	13.9052	7.33016	22.6232	8.99495	12.9778	7.40722	8.60765	11.9301	8.00974	10.6089	5.90286	4.85063	9.08841	7.09306	7.85603	3.9451	4.91977	8.55282	4.18328	9.01728	4.39222	6.57963	9.34192	7.82335	25.0061
Sun2	11.1052	10.7702	4.31256	3.49254	10.1162	8.75214	9.88876	25.7757	11.4206	6.11204	8.60179	5.39705	5.37641	6.11449	5.90243	11.2787	7.66318	5.34436	9.7879	9.15002	8.09646	12.503	9.73904	7.33477	23.6725	4.64083	6.87795	4.35293	4.96766	8.57014
Limch1	10.6026	19.1081	8.49638	10.9979	7.05985	6.95008	5.8758	7.96277	8.26161	8.0964	6.40532	8.28373	8.80816	9.52984	5.62159	7.51034	7.50014	6.44404	10.8361	10.9441	6.48594	22.7115	9.08576	8.3493	9.49878	11.6239	7.20113	11.8689	8.99439	6.64483
Mpst	12.6367	18.0823	8.8343	11.4417	11.5409	6.76785	8.28178	9.84506	7.20519	7.77336	6.28543	8.05508	11.3248	10.3825	5.50538	5.8809	7.26372	9.17399	2.93506	9.5097	5.39325	5.5305	9.04708	17.4066	6.02319	12.3087	6.43875	5.54285	6.31949	6.14635
Rwdd4	6.09846	5.09096	4.25221	8.66223	4.20248	6.25659	3.99052	8.30964	10.5027	7.08114	5.99	7.39772	11.177	9.01826	6.31884	6.83397	6.61153	5.87922	4.4419	7.49196	4.31811	5.90372	4.84803	8.83281	17.7807	6.75189	4.42509	20.5098	6.06063	5.4741
Klhl33	4.44917	12.8858	11.6785	11.9001	11.8911	8.62052	7.15959	8.77384	6.85134	8.79887	7.96383	6.32117	8.80339	6.71376	9.84383	7.18533	20.2381	5.36575	7.5604	9.75973	8.03064	9.30515	5.60876	5.64678	9.23177	11.07	12.5999	8.57172	8.73553	22.7744
Stxbp3	8.58418	8.37935	12.5394	20.8716	12.9258	6.95008	8.34462	7.31493	7.19494	10.5833	8.53329	10.4749	11.1722	12.2095	9.17563	10.0621	6.95801	9.36654	8.96678	7.04016	8.12279	12.1807	10.4009	22.5181	8.08929	8.9938	11.7754	9.57125	10.0216	11.0031
Galnt2	6.37334	5.96962	5.78092	7.43257	11.4653	9.38488	9.21095	9.61041	5.65646	10.6499	8.72596	11.0894	7.01602	12.8331	10.2941	10.0621	14.1891	9.30235	9.23758	19.8748	8.66255	6.60351	9.27917	5.46115	12.1646	12.1865	9.95231	7.14815	7.57682	7.20733
Mtch1	12.2048	10.8117	8.65729	19.973	4.28605	8.6104	9.09874	9.72264	5.87697	12.0446	9.52662	8.63147	8.83675	9.94396	7.32598	4.75216	20.4419	10.5304	5.41152	9.55795	14.9028	13.9195	12.9066	6.86853	9.80082	13.7175	8.22039	12.3102	5.74014	5.40092
Otud4	11.4155	14.0209	11.2923	7.82548	12.6632	5.49729	17.4074	7.04458	7.52314	7.9477	7.55279	11.48	5.97696	8.78928	11.0398	7.02283	5.22971	8.9472	6.41608	8.68945	25.4435	10.1703	13.9424	8.62991	12.4447	14.1101	9.63741	7.1395	7.13716	5.92684
Pdlim1	11.9613	7.93059	8.66936	21.9412	13.3039	11.2173	12.0479	8.23823	9.9847	12.9419	8.2507	9.67467	8.83675	8.85261	9.14174	7.09749	7.41046	10.6716	8.96242	19.3396	8.86442	8.85558	5.38097	9.03572	8.35193	13.8614	12.9645	13.6602	8.73142	9.74544
Igbp1	6.8485	19.8057	4.35681	7.01419	9.05762	7.56764	8.84736	6.71811	7.97956	7.55288	5.66888	5.77813	7.54032	6.35322	8.36702	7.77386	9.56267	10.355	8.80081	5.44352	5.89791	25.3241	8.90525	10.033	12.4447	5.42158	8.80046	5.70294	6.94405	5.24086
Rapgef2	10.8147	7.01044	11.6946	9.85552	10.2435	9.6886	9.30971	8.34535	10.7745	20.2794	9.06421	6.50218	9.81385	10.246	8.66722	8.62152	9.42001	19.9825	8.71783	5.82513	9.8123	5.98006	7.76201	9.82575	10.6938	12.8234	12.0696	6.99238	6.11405	10.1982
Mettl5	4.00935	8.63578	7.40617	5.11512	5.39239	7.2133	7.1955	7.02417	5.23082	6.29663	16.8311	6.96424	5.82921	5.20341	4.50308	5.61299	4.83025	9.15687	4.90924	6.23745	14.9028	11.9304	24.7129	7.5679	9.6695	6.28083	10.7603	4.88947	4.10479	5.75763
Ppp2r5e	11.4862	4.91749	4.85163	7.05421	7.81995	8.05865	3.99949	8.89116	7.3693	7.18882	5.8744	7.8836	9.85198	22.6699	5.15191	5.7711	7.35339	10.4277	6.84847	4.98733	9.34274	6.24301	4.99846	5.98784	6.58349	3.65945	3.642	10.1554	7.52751	16.6189
Rsrp1	9.75832	7.73072	6.98377	9.22613	10.5778	8.22569	17.3895	7.167	7.22058	6.76836	7.49285	9.93667	9.85198	6.08526	7.29693	20.7479	10.3494	8.29253	9.50837	8.38679	11.0893	12.8041	14.355	8.84145	13.0969	9.66113	12.3554	9.50635	4.21984	9.90551
Pcna	13.4457	14.9486	13.0986	12.1693	9.60282	5.60359	6.25286	8.63101	7.01032	5.85566	6.23833	9.07924	9.00834	9.83678	7.42282	8.67861	9.18767	9.62755	18.2655	7.24194	7.1047	8.82165	13.3407	11.2159	11.079	7.73763	10.5987	12.3838	6.57014	10.907
Klhl23	8.4114	21.9552	7.53088	7.18882	10.8644	7.4664	7.78353	7.6465	8.53341	7.30163	6.00713	9.49366	8.01218	10.7284	10.5798	9.39451	7.47975	7.92882	9.21574	20.7169	8.86003	9.42814	8.31644	8.67308	9.21426	10.3939	11.2823	6.50776	10.1778	10.8018
Mark3	10.1314	7.33098	6.8671	5.10057	7.47771	10.0075	6.80497	9.15642	8.68726	7.95795	8.45622	7.41677	9.45161	12.8088	9.49037	11.2787	10.0722	9.15259	4.92671	5.07506	13.0114	10.0474	22.405	7.93917	8.2031	10.7428	8.527	8.49384	21.3334	5.70733
Rsrc2	7.35114	6.90862	8.89867	8.44759	6.98025	7.29935	9.57903	10.2889	9.71291	23.4688	6.42673	6.37357	5.39547	4.43361	5.4957	5.52954	4.3778	17.0472	7.29397	6.70241	11.9714	9.94556	8.13592	4.37324	8.22061	7.06593	2.3037	4.1885	5.80588	5.82166
Orai1	11.0031	11.7846	10.9664	7.0724	8.75517	6.16041	8.21445	7.23331	5.87185	6.31714	2.98858	9.97001	8.46021	8.19488	9.12721	16.2065	7.14143	6.09317	4.52925	10.5361	7.94287	10.0134	9.86368	14.8811	8.56641	10.0973	11.158	11.8516	5.78123	7.38568
Lars	7.28831	5.61514	3.94647	8.18928	7.3225	8.1447	6.36956	6.49366	7.44622	7.36828	6.80351	9.51748	5.65762	10.5481	9.71794	9.94351	8.11156	17.9115	10.2989	7.39108	7.368	4.13939	6.69183	5.5	7.34952	21.6209	6.25645	9.22942	8.57939	7.72867
Thap3	7.17443	10.1593	12.1089	4.04553	3.82044	17.2157	8.55559	8.72793	8.02571	5.73772	7.28305	4.14425	6.83013	6.44579	7.30177	4.47546	6.6849	5.83643	6.82227	5.45229	24.342	9.91163	9.45968	5.09419	11.0571	8.23922	7.89721	9.29865	7.12073	5.05336
Mpz	11.117	6.49003	11.594	11.9947	6.96832	9.25833	7.9945	6.61098	8.52828	5.90693	6.65793	6.64032	7.18761	4.09257	7.72787	8.20428	7.82215	6.09745	9.18953	5.09699	9.53144	20.0481	6.73481	8.32771	8.51389	11.4974	10.0186	12.7775	15.9631	10.2988
Dym	3.64415	9.37868	8.2188	5.11148	12.3249	5.89719	5.39999	5.05006	6.18467	6.09665	5.33491	5.821	4.66623	7.80511	7.56808	17.4846	6.65229	4.79666	8.73967	5.33386	7.19247	5.92069	7.90384	6.35911	6.34711	13.796	4.23864	8.80105	21.1115	9.86892
Tmem14c	3.85228	13.0253	10.5078	14.3776	9.31629	8.20038	8.12916	7.03437	7.4616	10.2448	6.74357	8.68387	10.4382	10.7722	9.22405	10.2817	6.38327	19.1353	9.02356	6.20236	11.9801	12.9865	13.1473	5.94466	9.02603	24.7918	8.80874	8.28614	8.12741	8.968
Bap1	11.8435	8.93747	15.3876	7.96009	13.3516	9.81009	20.4463	9.76855	8.16417	7.24522	9.23547	8.77437	7.94545	8.40438	7.79566	6.39477	7.52459	6.08889	3.70813	10.3124	12.3839	9.56386	13.7103	6.9376	13.8017	13.1112	3.68757	6.71113	18.5106	10.8064
Rreb1	7.6378	3.82765	12.1411	13.2498	14.1993	13.7078	9.88876	7.81994	12.5847	9.16805	6.60655	8.38853	5.0523	10.4896	11.1512	8.14718	7.82623	20.787	9.30309	10.3694	9.43929	4.80526	9.51125	8.69035	9.41561	10.66	23.7123	12.704	7.69597	8.65703
Cse1l	3.78945	3.93701	4.05911	12.2676	8.26169	5.79595	6.45036	9.0952	6.16929	7.58877	6.67934	5.12553	7.59751	6.66991	5.72327	9.08707	7.87514	2.58018	4.8743	7.81217	6.4289	6.53141	7.66315	18.1319	5.88312	10.6512	12.8236	9.14721	4.93068	7.82928
Casq2	4.38241	6.19966	11.9883	7.60719	10.8683	6.98551	5.16208	26.296	5.09748	7.37854	5.46764	6.50694	8.54601	4.90621	7.59229	8.73571	8.53548	7.74911	10.0238	6.29009	3.91877	4.91977	6.90243	6.86421	6.01006	8.21742	23.588	8.26884	8.50132	4.843
Calu	12.6446	11.7054	7.9211	18.2376	12.4483	10.1391	8.2728	9.34516	8.51802	10.6499	9.0428	11.2419	9.28955	12.8088	11.7225	9.21883	7.99335	10.2523	9.53458	9.29038	9.93956	18.623	10.186	4.47685	8.59705	14.1537	13.5363	7.30392	9.38063	9.32471
Mfge8	7.08018	10.0349	6.50504	6.3848	7.58914	5.12271	3.87381	6.96806	22.6258	5.93257	5.46336	8.81248	7.20667	23.9756	5.48601	4.98933	6.07756	5.24595	4.752	5.75934	5.0378	4.96218	5.25203	9.2343	5.17837	5.692	9.54212	4.62986	6.54548	6.52135
Cdkn1c	10.3866	8.39443	10.8015	21.1844	11.3459	11.2932	11.6528	9.77365	13.9078	11.0396	7.55279	12.6376	10.0331	10.4166	9.63078	11.2787	20.4175	7.97589	9.42102	8.53592	9.42612	11.8159	12.4123	6.11735	11.0002	10.6774	12.9521	12.5828	9.51211	8.9863
Xpo7	14.4706	9.61249	14.398	21.5846	9.90528	11.7336	9.62841	10.6102	13.9078	13.0804	10.079	9.50795	10.586	8.91595	10.6573	9.60972	6.95801	8.74609	8.18934	11.0406	8.58356	10.3485	23.3763	8.76806	12.0201	8.76699	11.9494	9.10827	10.7283	12.4299
Chrac1	7.24904	22.4002	9.2728	11.7328	7.88761	10.3315	7.97654	10.9418	10.1232	9.35777	8.44765	11.1942	9.72805	9.7978	11.34	7.92758	9.58713	11.6044	8.48197	8.62804	8.66255	24.2002	10.3966	9.90346	14.3445	9.64805	6.81165	11.778	8.12741	9.51221
Slc25a39	11.871	7.18014	4.18382	8.28023	8.63976	8.27125	4.96009	7.92706	5.20005	6.2351	8.97429	4.1633	11.1055	8.86723	4.33845	5.53833	8.57217	5.12614	22.6594	9.54479	8.37292	8.01583	4.40964	9.16955	6.21579	11.3535	11.7588	10.1165	16.0247	5.37349
Zc3h14	6.73462	8.94124	11.8153	17.8374	10.5301	11.1262	9.10771	9.5288	11.9232	11.4088	8.84156	9.83663	7.76433	9.91473	7.93608	9.82493	7.1822	10.0169	18.4358	10.2598	7.39433	9.34332	10.8221	5.10714	9.02603	10.9391	10.3584	12.2799	9.84904	6.04117
Smyd1	11.5372	11.5697	4.66657	10.6159	10.8683	26.2513	8.28627	6.79462	12.5847	11.537	8.4134	8.76961	7.03509	10.4945	10.7929	9.10025	4.29627	9.32803	5.56875	19.6335	10.2731	10.7005	8.06716	6.50157	8.89471	11.4058	9.62084	8.6799	9.27379	8.38264
LOC100910779	3.68342	3.83519	4.03498	3.27426	3.39462	5.4568	5.61096	5.37142	8.26674	6.61454	19.1132	5.72573	5.14762	5.52984	6.47379	7.57622	5.01368	7.63358	10.4998	6.07516	5.10801	6.38721	4.0916	18.1319	4.75815	9.59571	9.44682	11.1463	9.00671	7.13873
Ei24	5.10888	6.63333	5.49931	5.64991	11.0235	5.4163	7.92268	6.62629	5.07697	6.63505	8.833	9.38886	10.7671	10.8697	10.6621	21.9381	6.74197	4.62122	5.92253	7.8341	3.95827	3.46928	5.41535	6.1044	8.1243	10.455	5.34905	5.49958	20.7828	5.80336
Larp1b	9.7701	6.56923	8.76994	9.04059	10.2276	6.40845	3.995	6.51406	6.73852	5.56339	7.09894	9.58893	21.4627	7.29354	10.2021	7.76068	7.30856	8.90869	5.65611	8.0271	6.60004	9.66989	8.81929	6.24255	8.02363	5.15551	8.65544	2.84282	18.0997	9.26069
Qdpr	9.72298	10.8305	13.0624	5.55169	12.9895	5.73521	8.77106	6.89664	8.41546	8.03487	7.02187	11.0323	10.1952	10.0317	5.17128	4.5062	2.99598	21.6898	6.67813	8.79472	9.29886	9.27546	14.4323	6.7606	12.8299	7.15316	3.81602	6.43853	18.0997	5.99544
Tmem261	5.65865	6.56168	9.24866	18.2376	6.94046	5.40112	4.70423	8.21782	5.93339	7.00936	4.97525	8.91728	8.65563	8.09256	9.21921	8.99045	20.5887	8.29253	7.62155	6.82084	4.97636	4.9749	7.29354	7.22685	4.23724	5.84902	13.3913	8.26451	8.24246	10.9436
Uqcc1	8.50172	8.37557	6.01425	7.41801	11.8115	9.48612	7.68926	11.2836	8.68726	9.97821	8.59323	9.8795	5.68145	9.75395	7.71819	8.94214	14.3318	10.4363	9.0585	19.4537	5.19578	12.9271	11.2476	5.05534	12.0814	10.6949	6.65421	7.1568	7.81102	3.53964
Pithd1	21.3937	5.28329	3.71717	6.27202	6.23209	7.67394	7.49624	9.88587	10.518	7.33239	5.8958	5.12553	6.30107	7.7369	7.92639	10.229	6.35473	5.54547	6.04483	6.64977	16.8424	8.59687	12.09	10.3611	9.41561	8.05603	10.4081	6.8193	8.62048	5.03964
Dad1	8.94153	22.4002	14.2371	9.86643	14.5017	10.4884	9.5925	9.69203	9.1129	10.5525	8.86297	10.0367	9.82815	9.99756	10.3426	8.60834	6.34251	6.72645	6.01862	10.5098	9.64993	9.41117	21.4594	6.27708	9.56444	12.771	13.2918	5.88468	5.46895	8.46038
Akap2	3.54205	11.6526	13.7463	8.02193	14.5017	6.22115	7.6758	9.40637	10.6565	7.06576	18.5352	5.69239	6.29154	5.48599	6.36242	5.15622	5.09112	5.94341	7.61718	6.79453	6.58249	7.12094	7.46545	7.26138	7.84853	3.63328	10.3956	7.41642	21.3334	6.29269
Abcf1	4.47273	19.5908	9.28085	5.47893	5.13371	7.2133	5.13515	8.39126	6.6975	7.78362	16.1161	7.45488	4.87118	6.63581	7.57292	10.7824	5.80038	8.02296	8.75714	7.86919	8.21494	6.09033	7.62018	4.04513	5.76931	8.13891	8.82117	11.4621	9.70934	10.8979
Pecr	4.73583	7.7458	10.3711	4.78405	10.0366	8.71164	6.82293	7.91176	9.08726	7.30675	7.27877	6.32117	7.95975	5.50061	7.76661	7.50595	19.9324	20.9324	4.25846	4.92592	10.2687	8.71138	11.2003	5.83242	4.11906	5.58296	4.40852	9.97799	5.18133	5.88568
Fdps	22.7131	8.24736	5.68034	8.01102	14.2232	6.9602	8.64986	8.15151	7.23596	8.96295	7.57848	8.33137	6.94453	25.5055	6.23653	7.59818	6.46479	7.88175	5.6168	7.33844	9.31203	6.14547	9.83359	7.49019	9.35433	9.76145	10.3542	7.09623	4.67182	6.2744
St3gal6	9.84471	14.5074	14.398	13.5663	24.2518	12.2601	11.3162	6.6977	11.0052	12.1318	9.43671	9.47461	10.1332	10.704	8.02807	10.5891	6.35066	6.06322	10.1723	7.82971	10.2072	8.40177	9.77772	22.7814	7.3539	12.4003	14.1081	13.2968	10.4736	12.3567
Znhit1	14.1761	8.52642	15.4158	12.3985	11.9787	10.7212	8.48377	7.07008	8.03084	10.6499	6.78638	9.77471	10.8958	7.47868	26.4568	6.17517	5.51097	11.3263	10.0631	9.82114	10.7909	12.0153	8.88806	7.30456	9.92338	23.7974	6.68321	9.30731	8.91221	7.66922
Herpud2	9.92325	6.7163	7.28548	9.87371	11.8274	8.55978	8.3132	6.92215	3.85132	9.08089	6.31968	9.94619	9.79955	10.4263	9.78573	9.18809	7.18627	10.3079	8.88817	19.3396	10.0493	9.61475	6.92821	5.63815	10.418	12.1778	11.2367	8.74913	15.9097	5.79422
LOC102547113	7.20977	4.34429	11.3808	7.4362	9.18894	9.37476	8.3132	8.75343	4.72312	9.4193	8.26354	5.45897	6.87303	9.38854	10.7832	10.1675	7.39008	9.16543	6.91836	20.7827	10.9752	9.39421	10.0829	7.38226	10.6631	19.4182	6.07828	9.77462	9.40939	9.49849
Tst	8.32893	8.10029	3.39131	5.93732	3.33094	12.3714	23.0453	9.66652	13.9078	9.17831	5.24928	6.76894	7.17331	7.72228	4.72581	6.60559	4.93623	7.33405	7.24593	8.61488	6.74047	3.88068	22.521	6.2555	6.06696	8.8106	4.17649	7.83614	5.64152	7.11587
Eif5b	6.58147	7.84762	12.4509	8.25113	8.21394	11.6476	8.60048	12.6711	10.1642	9.25009	9.31683	9.93667	9.17993	12.1218	10.1779	10.3827	4.39818	21.5914	10.2072	7.42178	8.87758	12.1043	8.90525	6.49294	12.1514	8.20433	11.3155	7.83181	17.2697	8.22258
Galnt1	14.0858	5.70565	7.34985	10.3212	14.9037	6.40845	5.83989	7.1823	7.07186	6.46071	8.40912	9.11258	8.6032	8.62362	9.24826	9.36377	7.03138	5.00633	7.38133	6.89541	8.00869	9.8565	8.7978	21.9439	5.76055	13.1112	13.4493	11.8429	7.41246	21.0138
Paip2b	21.7118	12.8745	8.83833	10.4158	11.2384	10.863	10.6563	6.27431	9.95393	6.71709	8.74737	4.7111	7.58321	10.6309	10.5459	9.61411	20.4827	6.0461	8.38589	8.33415	10.5803	6.09457	7.19468	9.85597	9.51191	8.68848	11.3983	11.7261	9.71345	9.91008
LOC100909752	14.5845	22.4002	13.2313	9.35346	15.3693	11.6121	11.3162	9.83996	13.9078	11.0396	9.72358	9.84616	7.90256	10.7186	8.55586	9.10464	9.7298	7.47954	9.9495	9.55795	10.3477	11.7099	5.91391	22.5181	11.8494	14.4633	13.1012	13.0025	10.4736	12.6586
Actr1b	11.9024	10.3479	13.9796	12.4385	20.3995	11.1262	8.56906	7.51387	7.24109	10.3679	18.4624	11.1085	10.7671	10.4555	10.2602	9.16613	6.92132	7.74483	9.93203	9.47461	10.0142	10.4206	10.5041	6.27277	6.28583	6.59051	6.17772	12.5093	9.38473	8.0305
Narf	8.89048	9.75202	4.28037	6.36661	6.35943	6.94501	7.65335	8.26883	6.92314	5.90181	8.20788	9.7366	5.8578	7.84409	8.33796	8.17353	20.5887	5.52835	5.02716	7.66742	4.29617	11.078	6.1374	6.24686	4.39921	4.99413	10.3666	9.60154	6.15514	4.81098
Ywhab	10.8264	19.4739	12.9055	13.5445	15.7474	7.18293	7.03839	6.58038	6.73339	6.05051	7.07325	25.5181	10.1332	12.3069	8.27986	5.31433	9.53006	10.0212	4.52488	5.43474	11.2078	10.9804	7.71903	8.30181	9.23614	14.2627	8.10852	5.31784	5.30048	7.39483
Shisa4	8.0619	8.56036	13.4969	20.1476	11.1429	9.6886	11.7516	7.34044	12.5847	10.4602	7.59989	12.8138	10.3667	12.3995	13.0831	9.33742	10.3534	19.9825	11.0414	9.55357	9.08383	11.4045	9.79491	10.3222	5.37097	13.8614	13.4783	12.1761	8.94097	9.63569
Arl2bp	7.28438	5.23803	8.6412	7.70178	11.5011	5.75545	7.52767	10.095	8.60008	6.16844	8.11797	7.32627	7.08275	5.92448	6.73041	6.55288	3.55441	4.62978	4.64281	5.85145	9.97466	7.13366	6.70902	6.29003	7.19631	10.8606	23.0826	4.3486	6.72627	21.2287
Usp33	10.2885	10.065	7.75616	3.71446	4.5885	3.31052	7.81495	6.88134	6.80006	7.22471	18.5352	5.09218	5.79584	6.88915	8.75922	5.4417	5.09112	18.9556	7.61718	5.13647	8.10524	7.75287	6.57579	4.73156	5.25716	8.01242	6.29788	5.214	6.15925	5.13111
Ifitm2	12.9312	8.61315	8.54063	20.4459	12.886	10.863	10.2254	7.25882	9.66675	8.68606	7.17601	9.8414	8.56984	10.5578	7.90218	10.9493	8.38874	11.6985	8.09325	18.4229	10.0537	10.8956	11.5485	4.70565	10.7551	11.746	13.2918	11.5876	6.7386	8.93142
Hopx	8.4114	6.14309	8.52856	3.72174	23.5633	7.92197	5.99251	5.7132	8.12315	6.35816	8.91435	8.9792	5.09519	7.13763	9.49037	8.34043	16.1905	4.93786	9.10218	8.6719	9.56216	4.94946	6.63166	7.542	8.5489	11.8376	9.22308	6.96642	6.68929	6.62654
Mtg1	14.1761	11.4792	12.1371	7.94917	3.9836	5.80607	7.17754	6.34573	6.05646	5.92744	18.3082	10.0224	8.56984	5.14007	8.34765	4.94101	6.35066	5.41282	7.72637	8.6719	9.8123	4.14363	4.86952	9.43721	10.5406	11.5803	21.3216	5.40871	5.49771	5.62958
Fsd1l	10.0411	11.1435	11.771	6.08284	10.8644	7.69925	5.36857	10.5133	8.4411	8.09127	9.31254	7.04522	8.00265	8.46284	9.40321	10.2114	16.0397	4.48858	10.6221	8.64558	6.40257	9.41966	6.53711	7.19663	11.3416	8.16508	12.6123	25.0229	8.09865	10.1387
Ttc1	13.1237	13.9869	14.7802	9.22613	15.4966	9.92651	10.4409	8.31984	10.1693	11.2242	7.80541	8.03603	9.63273	11.0548	11.3497	9.92595	15.4731	10.0768	9.45159	8.46136	6.22265	9.59355	8.85797	7.98666	8.17683	12.1865	23.7123	8.46788	7.35083	8.93142
Cxxc5	5.9139	10.412	20.0663	7.93462	9.98089	6.39832	4.51121	8.82995	5.57954	6.51711	6.67506	7.57873	8.35536	7.02557	8.72048	6.05658	6.02864	8.7846	4.86119	7.70251	8.36854	6.6332	8.66886	11.1295	6.04508	10.8039	10.3625	4.37889	14.1141	5.41007
LOC690183	7.13516	5.78484	9.18832	21.2026	10.2674	7.98272	8.16956	7.99848	5.81031	6.39918	8.23785	7.13096	24.1128	11.1425	9.6792	9.65803	9.29365	8.07003	7.74384	4.48728	5.50735	7.76136	9.52415	10.9611	7.17443	7.60678	11.9121	11.5054	4.09247	9.96038
Herc3	11.926	6.13555	10.0814	13.8829	24.415	9.20771	8.21445	21.6744	7.85135	8.82451	6.55946	8.30278	7.08275	10.4702	8.76406	10.005	7.17812	9.06701	7.82246	9.78605	10.2862	10.9677	9.07287	4.76609	8.42196	5.05956	11.3072	9.08231	9.86958	10.1433
Coro6	6.22805	7.21785	5.46311	6.80682	5.05014	8.59522	5.6738	10.0644	10.9488	5.43007	17.4776	10.5369	5.94836	10.2801	5.13739	8.15597	14.8372	5.0106	5.08831	5.39965	9.66309	12.0068	12.1888	4.57182	5.24841	8.15635	5.26619	9.66645	4.9841	8.73477
Alb	3.71876	11.7582	12.0808	10.4995	20.7657	4.42922	5.97455	5.44794	8.15905	5.69158	6.75641	5.74002	5.03323	5.50548	9.46131	4.40958	7.87922	10.6844	7.28524	7.57092	9.59727	21.4985	9.8293	9.07889	6.81111	11.3666	6.40561	8.91355	5.6785	4.37653
Atp6v1g1	5.98851	3.91061	4.52577	11.7473	9.71027	7.26392	8.55559	21.5316	8.46674	6.87091	6.18695	8.86011	8.83199	5.3788	5.38433	6.90863	4.924	11.2707	5.76966	7.54021	16.7239	10.5987	7.19468	7.81397	8.9166	10.1976	2.26641	5.90198	6.85365	4.28507
Egr1	3.39676	5.05702	9.94865	9.39712	7.37822	6.70204	6.45934	6.37123	5.97954	7.34265	10.2716	5.15887	8.1933	8.3654	7.74724	4.291	6.5993	8.34816	5.88759	22.4101	3.94949	10.1449	8.11443	6.73038	8.58392	7.43231	24.0107	5.99285	8.14385	10.9208
Ebag9	12.6328	13.3911	14.048	19.2999	13.2044	11.5008	9.28278	9.69713	11.9898	14.0238	5.71597	12.9805	12.0016	11.0499	10.2699	9.01241	8.42542	7.44103	9.15459	9.29477	11.6071	8.16003	23.243	8.89325	9.78331	10.0144	9.6747	13.3876	9.38473	5.94971
Brms1l	11.4547	11.8261	9.21648	9.35346	23.619	10.5137	8.97754	6.26921	10.3386	11.4293	6.8292	9.13163	8.11704	5.00365	7.59229	6.1005	4.96476	9.04562	6.38113	8.77279	21.7442	6.61624	5.944	8.39247	10.2517	12.1517	3.51355	9.00009	7.22345	4.61434
Myl12b	9.80937	14.1378	15.2106	8.88415	14.5296	11.1667	7.11919	6.48346	12.2104	10.5833	6.06279	7.01664	9.19423	13.0183	11.4611	8.36239	7.00692	6.64515	4.39385	5.7067	9.20671	10.1067	8.21329	18.3736	7.23133	23.9631	11.5433	5.664	4.49103	6.83233
Nsfl1c	13.4457	4.31035	8.07397	6.66493	5.84606	6.99057	6.88128	5.57037	7.64109	7.94257	7.00903	6.69272	6.54892	8.18513	4.90013	8.93335	5.20933	9.23817	19.1216	4.60571	5.38009	8.29999	5.21335	8.02551	3.92646	4.32243	22.0177	10.229	4.77865	5.12653
Tmem263	8.10903	13.0102	12.5193	13.9301	8.97404	6.55018	5.46732	4.12676	6.20005	5.50186	7.97668	6.34499	9.67563	8.59926	7.9506	7.19851	10.8059	8.14277	17.523	7.48758	9.18038	7.12518	8.98261	8.54357	6.72356	10.6774	21.8437	6.10102	4.71702	10.3262
Tmem134	17.3411	6.94256	7.13664	7.0724	5.16157	6.23128	5.85784	7.77403	5.34364	7.02987	5.245	6.92613	7.62611	5.70523	6.38663	2.65717	9.80317	15.7892	5.22808	6.82084	6.93794	6.50173	8.24767	6.09145	4.78441	7.37561	3.80359	8.74913	5.74835	5.36434
Sec61b	9.59732	12.8745	11.1756	21.2026	15.3693	12.5689	9.97853	12.2579	11.8514	8.98346	10.2759	9.76042	10.8672	10.4214	10.667	9.15295	8.4988	10.3421	9.53458	9.72025	24.0568	9.6402	7.04856	6.35047	10.0941	14.1755	13.6647	13.0025	11.2009	11.8948
Akap9	11.011	9.43902	13.6014	6.77771	8.1423	12.5385	23.0409	6.93745	8.11289	6.67607	5.56184	7.00711	12.5259	12.1364	12.0518	7.81339	5.59249	21.6684	9.73112	9.52725	9.15843	13.8856	14.8836	7.86146	12.0157	11.3709	8.41927	6.45584	7.53162	6.15093
Ak2	9.32636	7.22539	10.4958	18.6269	6.22413	7.36516	8.76208	7.18741	8.08212	8.47583	7.12891	11.1895	10.3048	11.3861	9.46616	10.3695	7.03953	11.8226	10.3557	19.8046	10.9006	9.85226	6.92821	5.11146	10.5012	5.73998	11.1166	6.80632	8.96563	10.3354
Flcn	12.5621	7.70055	3.95854	10.2412	8.07465	9.73922	8.84736	7.6618	7.7693	6.25048	9.42815	4.66823	9.22283	10.1291	8.06681	21.7844	7.39008	11.1551	9.80537	8.68068	7.28901	7.68502	7.92962	8.00824	7.16567	24.3862	10.7437	7.45537	10.0134	10.564
Rab1b	12.3383	12.8745	4.51772	4.93322	13.1964	8.02828	9.17056	5.98355	22.8874	9.71157	6.25546	10.6702	7.302	23.7515	8.5607	4.55891	5.352	8.73326	8.53439	6.95682	7.92532	7.45175	5.54859	8.71625	6.66228	11.3404	11.3155	10.1078	5.03751	4.06556
LOC100909597	13.7088	13.7079	23.0754	9.02968	12.1975	9.95688	6.50872	7.19761	6.34877	6.72221	6.84204	11.5277	8.53648	9.8855	9.07395	8.6303	6.35066	5.54119	7.37696	8.27713	7.92093	8.0031	9.79921	22.7814	5.85685	13.2464	12.604	10.6963	6.93994	10.5732
Thap12	5.92175	4.28018	11.1394	9.75365	11.5688	7.65369	5.84438	7.22821	9.03598	8.18869	9.14984	21.0023	7.54032	7.90742	9.85836	4.8927	11.2543	4.96782	4.5773	9.21143	6.65709	8.58839	7.9812	5.88422	10.1291	5.56987	4.92229	6.26978	3.54598	5.593
Ilk	8.28574	11.1096	14.3578	20.9189	14.4301	11.3489	10.4274	8.16681	7.98469	12.2959	8.27639	9.48413	6.78247	22.3435	9.34995	7.21168	9.35479	7.36828	8.90564	9.35179	10.668	6.34904	8.09724	6.57928	10.6631	11.9336	8.33226	8.65826	4.58143	8.67989
Ttl	13.8776	10.2309	12.8733	12.4058	7.69659	12.4119	9.86183	5.87133	6.36416	10.8243	7.78828	7.66924	9.51357	10.7625	9.15142	10.005	20.3278	8.2583	7.39443	8.65874	10.5144	8.59687	7.60298	6.86853	7.12628	8.44858	23.8242	7.87508	10.1901	10.9345
Zbtb38	22.6778	6.93125	8.66534	12.7732	11.3459	9.49118	7.94961	8.1005	9.53855	7.64004	7.51854	10.7703	9.68992	10.6261	11.035	8.34482	7.06399	8.63912	9.00609	7.84726	10.0229	25.2223	13.9424	8.23273	11.845	11.6631	13.7393	13.4439	7.37959	7.68751
Ikzf5	12.2048	13.7343	8.37971	21.9412	8.54027	6.94501	8.29076	8.35045	8.39495	7.80925	6.83348	8.42664	8.97974	10.9866	10.7929	8.44145	6.24468	7.87748	6.87031	8.3517	10.2731	11.8329	23.0797	7.73195	12.2215	13.8614	12.5792	11.077	8.08221	8.93599
Tfg	3.95045	7.35361	4.40508	5.99553	11.4931	3.34596	5.85784	6.2284	6.7898	6.49147	7.4115	6.75465	5.53846	20.151	5.09381	5.84577	6.75012	5.40426	3.09666	4.78994	6.67025	7.15911	5.65174	4.83085	4.6706	4.91998	17.6672	8.44191	4.84851	5.93599
Psme2	10.7243	8.2285	5.98608	4.3293	6.31566	5.98324	7.18652	6.53957	6.36929	6.7376	16.4115	4.78256	7.37826	11.2156	11.4611	6.90863	6.61153	6.46971	6.04046	9.82114	9.73769	7.43903	7.38379	6.60087	5.69927	21.3417	7.24256	5.04524	3.7391	6.3933
Cipc	12.6446	11.3962	11.248	12.2857	15.3693	12.2145	6.23041	9.24314	8.34879	9.60902	8.50332	9.46032	6.96359	12.1851	10.1198	10.4662	7.49198	20.7784	10.1286	7.55776	6.08661	7.1379	9.57142	8.88894	9.32369	14.4633	6.82408	6.71113	10.8311	25.0061
Fam213b	5.88641	8.62447	4.14762	5.93368	3.67319	5.28469	6.18104	3.06064	8.00007	5.92744	5.42911	5.63046	5.58136	5.62241	5.87337	14.1818	5.01368	5.76369	5.43336	6.16288	6.91161	5.81041	5.99127	6.35479	6.369	3.42828	4.03147	4.16687	4.1993	21.0824
Srsf5	10.7243	9.29195	13.0624	6.44665	12.7507	23.4926	5.16657	5.28471	7.00006	6.43507	7.15888	11.5372	5.09519	10.2119	8.09102	7.97589	5.80445	10.0982	7.09306	7.22878	10.0537	9.23305	5.45833	20.9121	12.7993	10.3067	7.94279	10.2203	7.45355	6.28355
Iws1	14.1761	8.68857	14.7842	21.5664	10.8882	11.3742	8.13814	7.02417	11.5181	10.5063	8.87154	8.8887	7.85013	9.39342	21.426	9.78979	7.47568	5.99048	7.58661	7.94376	10.9094	12.3461	11.4109	9.17818	9.18799	13.8222	14.0335	9.37654	7.848	7.2805
Parp6	6.07097	11.8789	7.76421	10.6741	10.2953	9.92145	9.36357	6.56507	8.29751	10.4346	9.2526	10.4749	8.36965	10.3532	9.82447	20.5283	6.04087	7.87748	10.1329	11.0186	8.645	11.8499	8.53563	4.67975	12.436	8.0822	8.65544	9.39385	20.3309	6.35672
Trap1	8.15222	8.09274	3.97463	9.52445	3.17574	6.17053	3.83341	7.28433	6.05134	8.23997	14.5318	5.63046	7.7405	9.92935	7.8925	5.58225	5.81668	7.91171	4.61224	3.94776	5.65216	8.20668	4.75348	6.67426	8.87283	8.01678	7.05611	9.88712	8.42325	4.98934
Ufsp1	12.1223	14.6205	23.0875	12.6314	15.3693	10.5998	8.3132	6.90685	10.6104	11.1268	6.41816	11.3943	10.3048	12.5895	10.4927	10.9054	6.44849	19.7643	10.4343	10.1019	7.99553	8.90223	8.30354	10.5683	8.75026	8.64486	10.665	9.89145	9.86958	12.6586
Pigq	10.1117	10.2159	8.95499	8.11652	4.71585	7.72962	17.8339	6.29472	6.21544	8.03487	6.34537	7.91218	9.08937	9.29597	9.24342	5.97753	8.34798	7.12867	6.15838	7.00507	7.08715	12.2231	12.7304	18.3348	12.4447	11.7591	10.9964	8.4073	5.72781	4.81098
LOC100911217	13.108	22.4606	15.4158	9.86643	14.8758	13.2522	8.42991	7.09559	10.7129	12.0087	6.94908	12.9805	10.9339	11.3666	9.83899	11.6344	7.04768	6.22582	22.6594	9.70271	8.89514	11.6887	6.97119	7.77944	6.89866	5.3954	12.7905	11.2242	8.43558	10.0839
RGD1309730	5.04998	5.60006	4.22405	4.06372	3.76074	6.56537	6.48627	5.97845	5.58979	6.38892	17.2336	8.56478	5.91023	9.41778	5.33107	7.04918	4.34926	4.60411	5.40715	7.54899	4.18207	4.30904	3.69619	6.57496	3.81265	22.816	5.95813	4.61687	4.95123	8.77136
Rfwd2	12.3618	11.4867	12.8733	12.4385	8.31343	11.2123	8.64986	12.5231	11.6206	6.51198	5.81445	8.64576	5.0523	10.1388	11.2722	10.9537	10.0803	18.8614	10.3863	10.0668	10.4618	10.2891	12.494	9.76531	11.7093	13.2377	8.04223	20.9858	5.92504	9.98782
Tmem41b	14.769	7.82877	14.7802	5.04963	12.3209	8.06371	8.67679	6.54467	5.93851	5.4352	6.96621	8.3266	5.74818	8.00487	4.91465	5.62177	5.35608	8.9472	19.7068	8.85613	9.58849	9.77592	6.61017	8.30613	10.6938	8.46167	4.32979	21.0161	6.33593	6.62654
Aaed1	19.0415	5.45676	14.2371	10.4885	11.3459	9.96701	8.8339	8.5851	7.43596	8.02974	6.36678	8.7839	8.79386	10.592	10.696	8.20867	5.81668	21.6898	8.39462	9.09738	9.29886	11.8499	14.0069	7.73195	14.3445	14.3369	7.7812	11.4578	9.29434	7.10215
LOC100911177	4.24889	8.62447	9.34521	9.45169	11.8593	11.0401	17.2818	8.99828	10.2155	10.9678	9.79209	9.06971	4.53277	9.5542	6.81757	10.6243	21.0656	9.61899	10.5348	10.5098	11.2648	8.06248	9.33074	7.37795	10.1422	10.6774	5.92084	8.19095	6.38934	8.82624
Dpysl2	9.91932	20.6504	13.2313	10.4158	10.6694	5.82632	5.26084	7.31493	8.22059	6.26073	8.2978	7.89312	7.73573	8.09256	7.18556	7.35662	5.21749	5.4984	20.2921	9.06229	6.79752	8.10065	8.65597	7.33477	7.0256	8.37444	7.99251	11.6698	9.17107	9.29727
Znrf1	5.12459	7.54594	6.92745	5.95915	6.8728	6.7476	6.46383	10.1103	6.58467	7.31701	9.02996	9.58893	9.85198	6.16321	9.97941	6.34646	7.05991	5.34864	5.05774	6.63662	4.90615	7.01067	4.04862	10.9698	16.9928	10.4113	5.18746	2.38416	15.8028	5.18598
Tmem123	9.83293	8.11914	9.88026	5.24609	20.3995	10.6453	8.05285	9.36046	6.49749	9.85514	20.4277	9.69849	7.68807	10.0024	11.4998	10.0841	5.38868	10.7058	9.99755	9.72025	11.6335	9.6402	9.05997	4.14011	13.3771	8.43986	8.65958	11.7044	5.61687	9.35215
Sdc4	11.0738	10.6307	20.5007	8.04012	11.4693	5.4568	6.16308	6.43755	3.6308	5.65568	16.7112	11.1085	7.91209	6.22168	9.66952	7.01843	6.93355	5.05339	5.76966	8.39117	8.7591	6.1073	10.5642	6.98077	9.88399	7.48465	4.63226	11.3496	6.68929	11.2317
Dtna	8.5292	11.136	6.03436	10.6559	9.65456	9.81515	7.12817	8.27393	8.85136	8.33226	8.18647	8.02174	9.48974	10.6504	11.1415	22.0567	5.98788	6.38414	10.526	10.3694	9.04873	10.7005	9.10295	6.10008	9.10482	7.92954	10.2092	12.7819	18.7202	9.19209
Pnkd	6.32229	13.0253	13.7463	12.6314	14.5017	10.5036	9.21993	7.51387	7.78981	8.49122	8.07515	9.58417	5.69575	9.66138	9.63078	6.17517	7.58574	8.5835	5.11015	9.75534	7.49526	8.30423	19.5941	8.11617	6.54409	21.0975	11.5309	10.1078	8.16028	6.65398
Abhd16a	9.50307	9.03928	6.8148	7.59264	5.9177	7.56257	6.41445	6.17229	6.88211	9.85514	6.8977	4.37766	8.04554	7.25456	5.18096	10.5672	4.96069	10.3635	21.1001	5.56633	11.5237	13.0501	9.93245	5.10283	10.186	5.19477	6.04928	4.23177	18.0997	6.99696
Kansl2	12.1655	7.31213	8.48029	8.53854	12.8979	7.8916	6.59849	6.40694	8.38469	7.72209	5.31778	6.56887	9.21806	10.855	6.32368	8.97727	6.73382	8.5835	7.21099	17.8131	7.71029	4.98763	7.44396	8.06005	5.36222	8.88475	10.7354	22.3964	7.86855	8.63416
Ube2h	13.4732	11.3811	20.3599	9.41167	12.5119	7.17787	6.3965	6.79972	6.20518	5.80951	6.54661	20.2639	6.64425	6.75274	8.14913	7.38297	8.33167	6.78207	8.62611	6.92612	4.82277	4.84767	6.3523	6.27708	6.78922	14.2365	12.5378	12.492	5.09915	7.33995
Polr2e	11.6746	4.70631	8.36765	6.58126	13.5785	6.47425	6.32468	6.51917	21.231	6.80425	8.39627	10.4035	9.00834	8.58465	7.82955	7.13702	6.67268	5.76369	8.40336	7.79024	2.77781	7.09125	9.73474	5.81515	4.11468	7.58933	6.58377	5.45198	5.01286	20.0991
Gkap1	8.77267	6.74647	12.2095	11.318	8.98996	7.34997	8.7127	9.16152	7.08211	7.40931	7.77972	13.133	10.8958	11.4251	6.73041	11.5905	7.1985	6.94039	11.1419	9.41759	12.5111	10.7556	10.2677	9.17386	21.8647	11.7766	4.86843	5.06688	21.3334	5.60214
Cast	9.80937	7.23671	24.7409	7.09786	15.5205	8.6509	5.92966	6.94766	5.31287	9.70132	6.0371	10.2892	9.566	9.83678	19.4649	8.44145	5.32754	11.6258	7.82683	5.10138	7.91215	11.201	10.1301	4.74019	4.7275	10.7516	9.67885	9.37221	6.07707	7.36739
Lamp2	7.20192	4.11802	8.62913	4.76586	4.34177	8.30668	8.18752	10.901	6.39493	26.9453	6.49095	5.95914	5.13332	7.40073	4.48371	9.89959	9.07353	17.6676	6.0885	8.20694	4.87104	4.84343	4.2893	9.84733	7.37578	6.90455	2.46114	4.38322	7.98771	8.91313
Cd48	13.587	8.63578	13.0986	14.1412	15.7474	9.34945	6.72418	10.8398	12.4975	11.2345	8.55898	9.85092	9.09413	10.8209	8.30891	6.79005	7.18627	10.5047	22.4148	8.36047	10.4398	10.1279	9.05997	6.22528	13.04	12.0252	21.736	13.0025	8.29587	12.1281
Hbs1l	9.97823	3.98226	7.40617	17.9757	12.4642	7.03613	5.39999	8.82995	6.6257	6.78374	8.42625	4.18712	8.47928	8.91595	5.66033	6.05658	16.2476	7.98445	5.45519	9.11493	5.28793	4.77133	10.8608	8.30613	8.73713	8.07348	11.6345	4.89813	8.96563	5.48324
Maea	21.0521	11.3887	4.4614	4.67127	7.33444	5.17839	6.82742	8.46777	9.04623	6.37354	6.93624	5.74002	22.2587	5.79293	9.68889	5.69644	8.07487	9.16543	6.66503	6.09709	5.23527	4.84343	5.09301	9.54514	4.57868	4.88509	7.59889	6.34766	5.79766	5.44666
Eif2a	5.15993	5.20409	4.17578	10.0483	4.06319	11.2932	8.78003	5.93254	8.82059	5.05063	5.4077	8.89822	4.54707	5.91961	6.23653	4.68628	3.35876	4.61695	5.28922	5.77688	11.6773	9.58082	18.9881	5.10283	11.6699	6.67774	4.61568	6.13564	5.88395	7.59605
Eny2	19.8269	6.90485	11.6946	11.5472	7.44985	6.63117	5.80847	9.83996	6.07698	7.10165	18.3982	6.97853	8.62227	8.5408	6.61905	8.74889	7.99335	6.17019	8.80518	9.18511	8.81176	3.52866	9.59721	8.70762	7.4502	12.4003	11.4729	6.49478	8.29587	5.78964
Eef2k	10.6772	6.34673	8.99522	12.0202	10.8405	6.42363	7.42442	6.98336	5.69749	5.54288	17.5975	8.21228	8.2505	7.04993	6.32852	9.00362	5.78815	8.51503	4.95291	5.9655	6.63076	7.85466	9.26627	6.93328	7.62967	10.7254	22.5356	10.4107	10.1079	10.9208
Klf10	14.769	10.4949	24.7409	10.1538	9.88936	6.93489	6.38752	6.64159	7.35391	6.91706	16.0047	7.61684	5.76724	5.78806	6.62389	4.78729	4.77318	6.65799	6.13655	6.22429	7.43821	5.56018	6.68753	8.85872	6.77171	14.2365	7.23427	5.1188	6.15514	5.67989
Pfdn6	8.72555	13.3836	8.62511	12.1475	10.5699	8.36236	9.5521	11.2887	11.4206	10.9012	8.91007	6.35451	9.64703	8.38976	9.1369	10.655	21.0656	18.763	10.2727	10.9177	8.7196	9.72926	5.13599	6.90738	10.3918	7.47157	7.35029	12.2929	9.3231	9.44819
Sdhaf3	11.2073	11.5697	8.04179	12.1111	10.8683	10.6605	5.98353	6.32022	11.0873	11.9164	8.45622	11.0418	12.3591	9.69549	10.5943	9.0739	20.5724	6.24721	9.80537	7.60601	5.25721	8.2194	8.76772	6.24686	8.75464	10.3459	11.9494	21.6435	9.06424	9.07319
Wbp1l	14.0033	11.9128	15.1543	10.4558	9.54313	11.7336	7.02492	10.3144	10.1642	10.4346	7.53995	8.94109	10.0522	10.2753	7.41314	10.8131	9.59528	10.0897	22.6594	9.49216	9.32519	8.92768	7.95111	8.33635	5.64236	5.8054	13.7393	13.2405	20.3432	12.1464
Trio	22.7131	12.3842	10.7814	12.1439	8.34526	5.64409	7.33465	6.93745	9.13341	7.37854	6.97049	7.7788	16.9395	6.59196	6.89988	6.40355	7.13736	9.24673	8.29416	7.79462	8.02625	8.14306	7.79209	7.42112	6.96431	13.3293	8.79631	11.9338	3.30767	5.30946
Letm1	11.0346	5.66794	7.29353	7.89096	11.8075	6.6413	5.32817	11.2887	7.92828	7.73747	5.97287	7.04046	5.92453	7.4397	6.50284	5.41974	9.3181	6.28144	5.93127	4.66712	9.75964	8.43994	5.97408	7.28729	6.58787	10.9304	16.9546	4.08033	14.1593	6.55337
LOC102557349	5.08532	5.79992	7.33376	6.02827	3.00859	6.93489	9.80347	17.4099	7.67699	6.92219	5.82302	6.64509	8.05031	10.5432	10.696	5.30555	6.04902	9.61043	6.53837	20.8354	10.9708	11.6251	6.85515	4.69702	11.311	8.45295	3.63785	9.12125	10.6914	11.2226
Abce1	8.69413	9.80481	7.59122	8.93872	23.619	6.90452	6.94413	6.6977	5.40005	5.68132	8.61892	22.5981	10.667	11.3179	12.5021	8.08569	7.84661	5.12614	6.28941	7.13228	4.72623	7.21424	8.52273	5.42229	4.03589	12.1735	5.01344	8.26018	5.23885	7.87501
Wdr1	10.2727	9.83875	3.71717	6.67221	4.54473	7.80555	7.82393	7.1721	18.9335	5.89155	5.89152	7.7788	8.18853	6.02679	5.48117	5.33629	8.2583	8.36099	9.49964	8.07974	13.0289	11.8711	23.0797	9.31201	14.3445	9.04614	8.36126	4.0587	7.7987	4.87501
Cox10	9.0829	9.52953	7.68375	17.761	8.08261	6.78303	6.36956	8.1158	7.11288	6.76836	6.32397	7.83596	8.35059	9.02801	7.01125	10.7077	4.60606	9.87573	10.6745	6.26377	8.5309	8.04552	12.494	7.99098	24.7975	12.8103	8.14167	10.6184	4.34722	10.3262
St3gal2	9.37741	10.3893	12.7124	21.2026	15.7474	9.4355	9.46233	9.34516	8.98469	12.2497	8.09228	8.03127	8.57461	21.3301	7.6165	8.9597	7.1822	9.26384	9.69618	7.88674	6.25336	10.1873	9.07716	7.61107	11.6743	14.1101	6.74536	9.65779	11.0776	11.3872
Apool	6.97023	5.01931	23.8317	6.57034	8.61986	6.06423	8.77106	6.64669	10.0206	10.5063	9.10703	8.31231	8.84629	8.74543	10.5556	9.06511	5.35608	10.509	9.63067	5.19788	10.0142	8.48236	21.4637	3.93721	10.2035	11.5934	10.3294	5.99285	6.68929	5.38263
Tm2d1	5.83929	7.08209	18.972	6.04646	7.5175	8.28644	4.91071	7.23331	8.33341	5.80438	3.72502	6.86897	10.1189	8.75517	7.1904	8.54685	7.34524	9.75164	4.47684	5.2242	6.08661	5.11486	6.9583	6.3332	4.88071	5.95806	3.63371	9.69673	14.9687	9.61282
Irf2bp2	8.11295	13.7079	10.0975	11.9474	21.3467	12.9536	12.0479	9.59511	8.04622	11.9215	18.3982	9.06971	6.63471	11.4153	12.3472	10.9976	4.52861	8.95148	10.1155	10.2247	12.9324	12.0068	12.6702	7.07143	6.11511	10.6512	9.81558	4.96736	8.96563	9.4802
Ctsa	13.9719	21.9552	15.4158	13.8829	9.98885	7.55751	7.86881	9.15132	10.4103	7.49135	7.28733	8.26468	9.12273	6.04628	7.10809	4.67749	10.3942	5.21171	9.09344	10.1896	12.4628	22.4613	9.89376	9.64011	6.1764	11.7155	13.8222	9.92174	5.24707	5.56099
Ube2n	8.05012	3.3902	11.59	16.9934	14.442	7.35503	5.21146	10.0287	7.58468	6.50686	8.59323	11.28	10.748	6.49939	10.5411	9.02998	6.68083	6.60236	9.25942	8.40433	4.59019	5.72983	4.40964	22.6864	4.90697	14.3499	11.3155	11.9338	6.8783	7.2302
Otud6b	9.64444	8.24359	4.69875	6.08648	24.4508	7.60307	7.78801	5.83052	8.32828	8.64504	5.86155	5.14458	4.71865	5.93909	6.60936	8.51611	5.93081	20.9324	5.80461	5.95672	13.38	12.7363	9.28346	8.79396	9.48127	8.06039	3.79944	4.92842	5.63331	8.4741
Akap13	15.3463	8.99026	9.87624	13.5845	24.8289	9.90626	8.44786	5.77951	9.53855	6.13255	6.28971	11.3943	11.9301	12.9257	11.3497	9.9523	5.98788	5.26734	9.6394	8.41749	10.0229	25.2223	14.0541	6.99372	11.7268	13.9836	10.7893	5.67265	8.43558	6.79574
LOC685108	8.80016	11.2831	10.3228	12.806	12.1975	7.66888	9.45335	8.5749	8.50777	6.84015	8.76021	11.6658	9.67563	7.56638	24.4571	9.5658	9.33441	8.15133	6.29815	7.08841	10.769	9.58082	8.23907	10.387	9.75267	9.4823	11.5433	21.3925	7.40013	10.1387
Igf2r	7.74775	9.42394	8.76994	18.867	7.74434	5.72002	5.18004	7.1517	7.22058	3.83028	10.3958	7.91218	7.7834	9.69549	8.17818	6.45186	4.45932	7.04737	4.98785	9.25529	20.7524	10.0346	6.94541	7.10597	6.60537	4.18722	10.1429	8.35105	6.52083	11.6616
Fbxl5	13.1276	10.412	11.6986	19.973	11.8274	8.08396	8.63639	8.28414	8.70264	10.5012	6.12273	9.53653	8.47928	10.7722	9.8632	9.64047	7.98112	9.23817	10.1024	10.1019	8.13596	8.42722	24.7129	6.47135	12.5104	8.77571	11.0213	9.65347	7.26454	7.98477
Eif4e3	8.48994	8.24359	7.51077	9.42259	10.9559	8.43323	9.90671	10.901	7.6052	11.2345	9.53519	9.20309	6.85873	8.3654	7.97965	9.0168	4.76911	7.82613	9.38171	9.49216	23.1528	9.59779	6.15459	6.76492	9.66074	10.3634	6.12386	9.7227	16.8424	9.77746
Tmem69	17.0506	6.01111	6.06252	4.41297	6.70964	17.0082	9.74512	6.75892	6.94365	8.29637	3.31398	7.81214	6.54415	9.4129	5.4037	6.7637	9.84393	8.177	5.7784	5.13647	4.00654	7.31179	7.10873	5.57339	9.73078	4.63211	7.0934	9.43279	4.97177	7.00611
Dpy30	5.11674	8.51888	3.59246	5.20607	4.74769	6.05411	5.01844	5.90704	5.86672	5.38905	4.96669	6.75941	7.08275	6.95736	5.62159	7.13702	5.29493	5.40426	5.11452	2.89502	4.86665	5.83162	17.2432	22.6864	4.65747	6.42912	6.01613	7.21738	6.70573	5.08995
Tpm4	14.769	14.5074	14.1606	21.9412	9.79385	10.8225	10.2164	12.2579	12.2924	9.17318	8.63605	11.28	9.36105	10.6553	10.4249	10.7077	6.60746	10.0169	9.15459	20.6248	6.39818	12.8508	12.5413	7.05848	11.7575	11.8507	11.5061	9.21211	11.5707	12.6586
Nfatc1	4.75546	10.2951	4.3206	16.9097	7.93934	5.91744	7.15959	7.28943	8.02571	6.36841	7.38581	5.68286	5.4336	5.00852	7.13714	11.2831	6.94578	7.48382	10.526	7.58408	10.0229	24.2002	11.9439	6.7606	13.771	7.62423	11.3983	6.38228	5.56345	6.79117
Aimp1	7.5789	5.8037	7.75616	7.29432	4.12687	5.8162	6.6748	4.51955	6.56416	5.76849	7.72834	4.72539	8.67947	4.31181	5.91695	6.31132	17.8903	4.82233	4.79568	19.9669	6.09538	6.76468	8.13592	6.57496	9.60384	4.83711	7.77291	4.83755	4.60608	5.48781
Uchl5	8.96116	4.95143	11.7026	7.21428	3.68911	6.30215	8.34013	7.1619	5.42056	7.95283	3.37821	5.65428	9.79955	8.32643	5.80074	10.0401	5.8982	20.2221	7.43374	5.93918	9.06628	7.14639	7.18179	8.86735	6.87677	8.37444	9.13192	19.8478	8.678	9.06861
Adipor2	8.21898	5.06833	8.24696	9.96102	3.3986	26.2513	11.4553	7.09559	8.68726	9.80387	6.59799	6.72607	5.29061	4.51157	7.56324	10.9537	6.11016	5.1133	9.9364	9.6413	7.7059	6.01823	6.71332	4.95173	17.9426	3.82956	12.9521	7.61114	7.48642	9.45733
Atxn2	22.2458	14.6205	14.2934	13.9047	13.284	9.3292	7.01595	6.36613	6.98981	7.67594	7.59561	7.25005	10.1999	9.88063	6.92894	9.43404	8.36428	8.17272	7.77441	20.7827	3.87489	6.51869	7.40528	7.27434	5.01203	8.30901	7.67761	11.1982	5.53469	4.98476
Cnot7	10.7322	9.7935	9.43372	13.8974	11.9787	6.71723	8.81594	7.79953	4.35388	6.74785	5.41198	8.36471	4.99033	8.55054	10.7106	8.35361	5.59249	10.5604	6.61262	6.78575	14.9028	25.2223	10.186	6.94192	12.8299	6.91763	8.60986	8.04383	7.92607	6.71343
Odc1	12.6446	22.4002	7.83662	9.35346	15.3693	25.6186	6.09126	5.76421	8.29751	8.60402	7.77116	9.11258	7.51172	9.57368	11.7129	8.44584	6.61969	9.24245	6.74802	6.56205	11.0761	6.14123	9.19751	7.52041	4.36856	12.1517	5.62251	3.86831	3.5994	5.38263
Gpd2	5.50157	5.77353	6.17516	5.02417	9.9013	6.97032	7.60398	7.97807	8.25135	6.71709	7.06041	6.0687	5.18099	7.24969	5.34075	6.69343	6.97839	9.84577	10.6876	9.38688	10.668	19.607	7.80069	5.18485	10.2429	11.7504	9.67056	11.7391	7.7083	21.8872
Commd8	4.24104	6.95011	5.15737	4.23471	3.9438	7.71443	7.31221	5.18779	6.33852	8.68606	15.7221	4.54438	9.20376	4.36053	6.21716	8.45901	5.66994	6.87621	7.25466	6.25061	6.38063	6.98522	4.33658	20.6703	4.04027	5.29509	4.57011	4.76832	8.24657	6.69513
Srrm2	13.0923	9.5333	6.47688	21.9412	14.3067	7.28923	3.12418	8.54939	8.75905	7.01961	5.47192	6.75941	18.8174	5.97807	8.78827	6.52214	5.25417	6.28572	8.15877	8.36485	10.3608	8.27454	8.31214	6.9376	6.66666	10.5378	13.6399	14.0756	4.63484	4.66007
Cope	12.9312	22.4002	8.52856	9.35346	15.3693	13.7078	9.75858	9.75834	11.9232	12.2087	8.66602	9.12211	10.1952	9.53471	10.328	10.1807	7.14143	8.6648	4.94418	9.84307	9.33836	9.23729	11.2863	18.2873	8.64521	14.3063	14.1454	11.6915	5.64563	7.42684
Etl4	7.87341	6.79926	9.96876	7.18518	12.6074	8.89387	17.385	7.83014	8.86674	6.74785	5.69885	10.8227	9.67086	11.0694	10.5217	8.27455	6.8561	21.6684	7.59534	7.07525	9.15843	14.3013	13.5126	8.18093	9.5338	10.106	9.00762	6.70247	7.79459	4.44056
Sec61a2	15.3463	21.8723	15.0738	13.9047	13.674	10.6757	9.29624	6.90685	12.2104	12.9727	8.32777	9.58893	6.50126	6.78197	5.61191	8.63469	6.4118	8.28825	7.17605	9.29477	7.94287	6.24301	7.93822	19.1809	8.00612	8.30901	11.4149	9.30731	4.84851	6.11891
Rtfdc1	10.4063	3.59007	11.598	3.51073	12.1299	8.23075	5.68278	5.64688	6.11287	5.82489	6.65365	5.12077	9.61366	8.55541	6.03316	9.7327	17.2299	5.19888	7.19789	8.29906	6.30164	3.85523	5.66893	8.0471	9.09607	6.80859	24.0107	8.26884	10.3421	10.8659
Lama2	13.0923	18.8856	11.3245	11.6636	13.1487	12.2601	9.99649	6.92725	8.38982	9.86027	7.36012	7.1786	9.38488	11.1425	11.8775	8.87626	7.65911	5.3358	9.34677	9.50532	7.64446	20.9005	7.94682	7.39521	5.26154	8.52273	13.1758	6.97507	10.0874	9.1738
Commd1	6.21627	4.44988	4.41715	5.87911	8.34924	7.88654	6.60298	6.27942	6.09749	8.99884	16.7497	9.46032	8.89872	7.72716	7.66976	6.42112	4.33296	5.93913	7.70016	6.62346	4.62529	3.68134	4.56007	6.57496	7.91419	7.4454	9.64984	10.203	5.3087	21.8644
Hif1a	11.0503	8.39443	9.76762	12.8533	10.1202	7.59295	6.00148	6.1978	8.13341	8.43994	8.30636	9.8414	8.47928	9.77831	8.42512	9.47796	4.79357	9.19538	17.6933	8.94386	6.18315	8.45691	6.80358	8.11186	6.84613	9.86613	21.0482	9.88712	7.69187	9.77288
Rars	4.12323	8.14931	7.41422	5.33704	5.77443	5.89719	5.7546	19.7003	6.118	6.09153	8.96145	5.53995	6.54892	5.56394	4.60961	10.2861	4.87101	4.25752	9.53894	19.4493	8.50019	8.69017	9.66168	4.83517	11.9763	5.26455	4.18477	7.90104	5.84697	4.55946
Pfdn4	9.25175	22.4606	14.5911	8.94964	6.63005	9.82527	7.62193	8.51368	8.43597	7.45545	9.48809	8.8363	9.52787	10.1924	8.20239	10.2202	7.99335	8.6648	9.89272	6.77259	23.7233	8.99554	11.3293	9.12206	10.6982	12.7667	8.82532	7.11786	9.8326	10.2211
Rcan2	12.6524	4.2123	9.45785	9.71727	10.3908	6.79316	7.18203	5.2439	7.43083	7.7067	5.44623	9.40315	8.98928	9.75882	6.12516	7.46203	15.5179	10.248	8.27233	8.27713	25.7288	12.9271	14.8836	7.85283	9.6695	11.9205	6.27716	7.38181	8.87112	7.41312
Zcrb1	11.3644	10.1782	12.1089	8.23658	6.57035	5.86175	7.28976	7.59039	6.70262	6.75811	5.42054	7.64066	9.79478	10.5968	6.35758	6.40794	6.41995	20.6671	5.3591	4.51799	7.53037	10.0982	11.2863	9.0055	7.63404	11.9467	7.38758	23.9627	8.83825	5.3872
Lynx1	5.4623	7.54971	8.08202	5.21335	5.40034	6.25153	16.8733	8.33004	9.52316	7.12216	5.7802	6.3688	8.57461	5.80755	7.10325	3.20617	4.72019	19.6488	6.90962	8.11044	8.73716	12.9271	9.91955	6.9376	9.42437	6.83912	3.67514	7.18709	5.9538	8.34148
Esrra	11.5097	12.305	13.6578	13.5663	7.13148	6.54512	5.95211	7.6261	7.27186	6.49147	6.53805	7.11667	8.38395	7.15712	8.31375	19.4917	5.24194	7.47098	8.7353	8.39995	6.82385	7.21849	7.5643	6.30298	6.0013	13.9836	12.0613	7.14815	18.6709	8.34605
Nf1x	7.3158	20.2696	11.94	13.0206	13.4073	10.4479	6.594	6.208	5.78467	8.66555	5.72882	11.3514	22.4637	7.23995	9.08848	5.389	9.75018	9.34086	8.77461	9.3167	7.75417	10.0474	4.76637	9.01845	6.30334	13.5997	7.99251	12.5698	7.51518	8.25459
Esf1	9.56198	8.17948	8.79005	9.62632	6.00127	6.24646	5.09026	6.49366	6.91801	7.13242	5.13367	10.0081	7.17331	8.66747	5.14223	9.02558	13.3535	10.5775	5.81334	19.4931	8.58356	13.2961	14.8836	7.19663	13.8017	9.22496	4.54939	8.13037	9.47102	5.23629
Afap1l1	9.29888	21.2086	8.19868	10.0338	9.31629	7.59801	8.48826	9.19723	8.78469	6.86579	8.03234	8.92204	4.98557	8.37515	8.53649	8.66105	7.39008	8.73754	6.31125	9.58427	8.32904	21.4985	9.83359	5.99215	11.8494	10.7908	9.98545	9.21211	11.1433	11.3872
Bag6	7.76346	4.55547	4.22807	6.63947	3.80054	5.31	4.99151	8.80955	10.0565	6.18895	5.72454	5.92103	5.70528	4.93544	4.54666	21.758	4.64275	8.46797	11.2423	5.57072	6.19632	9.72078	5.80216	7.42112	11.3679	10.25	3.78701	4.83322	6.16335	23.8171
Akt2	9.84079	10.7966	6.17516	6.15924	11.2186	5.29481	9.46233	7.45776	5.34364	5.65568	16.0904	11.0656	10.1427	9.31546	11.8387	2.93826	6.34251	5.82788	6.39861	6.34273	4.83155	5.05973	6.77349	17.6656	8.68022	10.673	3.95689	11.9338	4.16643	5.41922
Gja1	12.7428	20.6504	9.06763	11.9947	14.8758	6.37301	5.18902	5.78461	6.19493	5.96334	5.75451	6.40215	9.18946	7.24482	8.11523	19.461	3.81121	4.19333	8.69599	7.48319	5.26599	7.22697	5.84514	8.59105	9.75704	7.33199	12.8734	4.77265	9.59429	10.8339
Tmem38b	13.1276	7.13489	13.3601	9.45533	13.2044	9.8354	17.9281	7.93216	10.3437	9.4193	7.42863	9.70802	7.81676	12.5164	11.064	9.97865	7.58574	7.42819	8.96678	10.4572	12.3444	25.3241	10.186	7.05848	13.771	10.4288	10.0766	8.00489	10.1819	10.6372
Dctn5	9.25175	11.053	9.86014	9.45533	7.82393	12.8321	10.194	7.24862	11.9898	10.3987	17.6317	8.49333	7.36873	10.6845	8.6527	8.97288	5.1645	10.1453	8.65668	9.40004	7.99553	9.96253	4.10449	4.44231	10.9564	11.4669	4.55768	9.34192	22.0114	6.97867
Ddrgk1	13.8776	10.9097	14.3779	7.35253	12.2851	12.4119	10.1895	9.19213	13.9078	9.47571	9.70217	24.1557	8.34582	5.66138	10.1731	7.39176	7.61834	9.13548	8.97989	10.4747	7.14419	9.12277	9.48976	6.4325	9.02603	8.29593	12.7698	12.8165	15.47	9.38416
Pik3ca	4.13894	9.47296	4.79128	6.66857	8.22588	3.06755	7.97205	6.43245	7.9693	6.18895	6.33253	6.88326	5.0237	7.44945	8.39607	4.49303	21.0656	7.98445	7.54293	7.77708	6.08661	4.06305	7.44396	9.84733	7.7391	5.6353	14.3277	4.83755	7.244	5.14483
Trpc4ap	7.09589	5.05325	17.6686	3.78723	9.78191	6.84378	6.10473	6.25391	6.00005	7.61441	7.19742	5.91627	8.26956	8.16077	5.66033	7.82217	5.86967	7.88175	5.27612	20.3046	6.61321	7.03187	5.43255	4.65816	6.93805	4.42275	7.59889	10.5881	7.39192	11.1037
Suds3	12.9391	11.5961	13.69	5.31157	10.8803	11.6628	11.0469	9.31965	13.9078	9.67055	9.79209	10.9942	12.2399	12.3069	10.8994	10.2422	8.90641	8.42945	8.71346	9.91325	8.30271	11.5615	14.557	8.23273	24.7975	8.62741	10.3335	11.7044	15.959	10.2256
Nampt	11.9613	9.0506	12.3906	11.5509	13.5785	5.69977	7.52767	7.08538	7.28212	6.20946	6.29399	7.85978	6.4107	7.2838	8.18302	7.45764	10.2597	5.83643	8.76587	8.45697	7.09153	6.18364	8.10154	22.4015	7.27948	8.83677	22.7552	9.80924	5.12791	9.89179
LOC100912008	5.78038	5.61891	5.38265	9.67725	11.517	5.82632	6.79151	9.04419	7.47186	7.01448	5.50618	7.33579	8.45068	8.35566	6.79336	8.58638	7.18627	9.39221	8.98862	4.85135	7.11786	7.99462	21.4637	3.77747	8.19872	8.67975	3.59642	8.21691	7.22756	7.83386
Snrpd3	5.87463	11.7092	9.68716	8.90962	11.7717	9.82527	9.21993	7.71792	8.06674	10.9832	7.54423	21.4882	6.90639	9.88063	11.4611	5.60421	19.3495	9.6789	7.40753	6.03568	11.1683	5.31844	10.3021	7.28729	8.70211	14.1057	4.7897	5.88468	7.51107	8.19971
Mfap1a	5.82358	4.52907	9.21648	6.08284	4.74371	8.99511	3.86034	8.39126	6.80519	7.64517	7.30446	6.00678	6.15332	6.15834	5.62159	4.65992	9.11022	21.5914	7.59097	7.05332	5.39325	10.5478	10.8479	8.66445	8.65834	6.23721	7.44144	7.41642	14.8537	4.5869
Azin1	10.3238	4.75156	6.18321	8.60402	10.7649	10.3922	8.94612	7.08028	11.8514	6.58377	9.56944	11.0894	8.6604	7.68331	9.14174	9.38573	6.97431	9.34942	9.15896	9.45707	9.22426	22.4019	7.62447	6.61382	5.97066	5.51317	10.1636	11.3669	17.3149	7.45885
Myo18a	7.842	11.0794	4.64646	11.358	7.3623	9.1824	9.29175	6.74361	7.24622	9.27573	19.126	9.59369	10.2285	7.51278	9.8632	10.4047	4.98107	9.15687	6.77422	9.85184	9.64993	11.5869	6.23195	5.0208	9.77455	8.61869	9.23965	9.92174	6.05652	24.1235
Slc39a1	8.51742	11.1926	5.56368	11.3871	14.0162	7.34997	7.16408	8.22292	6.04621	8.36816	6.65793	10.5321	9.38965	9.71985	8.83185	6.86032	19.3495	7.54372	7.06249	8.17185	8.94341	7.93949	9.86368	6.06986	5.44539	12.108	22.5356	10.1727	6.38523	4.23934
Ubr2	22.5914	8.43968	8.26305	10.8269	9.57099	10.6149	9.50721	10.3552	12.1027	7.09652	7.54423	8.68387	9.53264	10.1145	4.85171	9.33742	10.0437	9.54625	19.3924	9.68516	11.12	7.04036	9.05138	10.5035	9.77018	12.9237	7.60303	12.6304	7.94662	9.95581
Smim11	4.29994	6.21474	6.16712	10.9069	14.1993	10.4783	5.14862	17.5528	7.38981	7.58364	4.67554	4.9207	7.45929	20.3654	11.4126	11.3182	5.44575	8.60061	8.91	11.9968	7.8551	6.79861	10.2075	6.96782	7.50273	11.8856	4.50796	11.315	9.0437	9.71343
Tigar	5.74897	9.49181	7.29755	3.32519	4.71585	8.14976	21.4922	6.6875	5.81031	5.22497	14.3734	4.96357	8.97974	6.55785	7.26303	9.50431	5.20933	5.74658	7.17168	8.84736	7.15736	7.99038	7.81788	5.94035	10.1422	7.59806	3.50112	5.07553	4.10479	8.77136
Pcolce	8.92975	13.8323	15.4158	13.9301	14.0879	9.85564	11.3162	9.40127	12.5693	11.0396	8.59323	11.6372	8.59844	11.1181	11.0156	9.7327	9.39555	6.77352	9.99318	9.75096	10.7865	25.2223	7.58579	9.82143	8.26438	10.7428	21.8437	11.7391	9.57785	12.3567
Htatsf1	8.2661	6.66727	7.30158	8.01466	9.67446	8.80276	6.29774	6.72831	9.9847	12.6804	5.88296	10.9132	8.86059	12.5164	12.2891	8.20867	4.72019	21.6898	9.49964	9.04475	13.5511	7.51961	11.0929	5.24098	8.74151	9.1072	6.08657	6.49478	15.9179	8.11739
Pkn2	11.3605	7.94944	12.4227	12.8533	9.96895	11.5008	9.79449	8.6004	12.4616	14.0238	7.42006	10.6845	11.7156	9.51522	10.4249	9.72831	7.52867	20.7741	10.1155	8.12799	8.35098	12.7447	7.07004	7.88737	10.7376	10.9566	12.3554	19.9214	7.1536	10.9208
Rer1	7.46894	7.22162	7.64352	3.17967	3.98758	7.68406	6.42792	6.23351	8.9488	5.90693	5.36488	5.58759	7.13994	5.98782	5.95085	8.41949	5.352	7.50521	5.80461	5.94795	5.45469	8.29574	3.45981	18.7449	10.1422	6.59923	5.76753	5.22265	21.3334	8.4055
RGD1311703	4.1468	5.10227	4.60623	7.68723	7.91944	7.24367	8.07978	5.2388	5.69749	4.53788	4.8939	5.23985	7.50695	5.58343	8.4687	10.1016	19.9324	4.65118	5.21934	5.91725	11.8573	7.95645	9.83789	6.57928	5.34033	4.20903	18.5207	6.32603	9.51622	10.6921
Ino80c	8.67843	10.5439	4.79933	8.13835	9.22078	5.17333	6.57156	7.07008	19.7284	7.15293	7.00046	10.0176	9.70422	5.93422	8.12976	5.27041	21.6281	7.83469	4.76074	4.50921	11.6686	3.79161	10.5041	10.8403	12.1777	5.96679	10.7395	4.46543	10.5311	10.9436
Coq7	3.53813	9.42394	5.74069	21.9412	12.2413	6.33252	7.13265	6.49876	7.44622	7.96308	5.13795	5.51614	5.14762	8.67722	8.78343	4.91027	9.59936	19.1353	6.6694	4.8689	6.27092	8.5587	6.99698	10.6503	7.64718	8.61869	4.5411	6.78036	4.88549	5.1494
LOC100912538	5.47801	4.75911	3.43959	6.32296	3.68911	7.30948	5.53465	6.95276	7.31801	6.81451	8.66602	4.86354	4.79015	4.39464	2.98753	4.76094	9.91322	7.35973	5.19313	6.97437	3.83101	8.51204	9.02129	21.9396	3.86955	7.89029	8.01322	14.5473	5.27583	4.54574
Rasgrp3	11.6629	10.2309	13.69	8.18565	10.1918	6.51475	6.71969	8.98298	8.07699	7.30163	6.17411	7.37867	8.05508	10.3922	9.25311	6.55727	4.58568	11.2749	8.90564	9.01404	9.29886	10.6157	24.7129	6.55769	14.3445	9.51284	10.5407	10.4323	20.1542	6.23782
Thrb	20.6201	9.15619	8.71362	9.31708	4.30993	7.98778	6.96208	6.93745	8.27187	7.46058	6.59799	8.96015	8.83675	9.66138	10.0763	9.96108	5.65771	20.0767	9.11092	7.89551	10.1809	7.61716	6.88953	7.48156	9.21863	9.63932	6.57548	7.37315	8.77662	6.38873
Pitpna	10.7243	6.99913	24.238	10.5031	11.3141	7.45627	8.03041	9.47779	7.94879	7.90155	8.86725	10.1748	9.90918	9.73446	9.21921	7.40932	9.53006	5.91346	8.86196	5.1584	23.0958	9.52569	7.60728	9.8646	8.2994	11.4974	9.16093	11.1679	10.4736	9.98325
Neu2	9.84471	13.9869	24.1978	8.48033	13.2044	11.7336	7.98103	10.9163	12.8309	12.9419	7.33443	10.394	8.43162	10.4507	9.21437	8.38874	7.1129	7.06448	6.92709	8.3517	23.3503	13.8856	12.1888	6.90738	11.5736	12.8103	10.3003	13.2405	7.61791	10.8064
Srebf1	8.27003	13.3911	11.9319	12.5477	15.5165	6.06423	6.27979	7.83014	5.65646	6.51198	6.36678	6.79275	6.87303	8.00974	6.50768	4.80925	6.31397	7.4068	19.602	6.834	7.46893	7.51537	8.06716	7.99098	8.93849	12.4003	7.5906	13.2968	18.9955	10.7744
Plin2	8.40747	11.8865	6.21137	12.846	11.4931	11.3894	10.4364	9.0799	13.9078	8.68094	9.52234	11.1561	10.1713	11.274	8.7108	10.2114	16.0397	4.48858	11.6485	8.64558	5.87158	10.4121	11.6215	9.40699	9.17924	24.5214	12.8651	12.7819	11.846	11.7028
Zcchc24	4.66515	10.5175	11.067	4.2056	9.83762	8.77745	6.7556	6.36613	7.30263	5.68132	8.58038	7.70735	10.0522	5.74421	8.59459	6.25422	8.35205	4.93358	11.2423	6.24184	7.81561	5.46688	4.00564	17.8426	8.75464	7.46284	13.1924	13.0025	7.82335	25.0061
Rnf170	12.9116	9.10339	24.1857	9.37165	12.6234	6.33758	5.09924	8.47798	6.65647	7.66568	8.4605	8.79343	8.37442	7.17174	6.19779	5.46805	10.2475	4.9507	5.11452	8.3166	7.60936	5.21665	8.30354	22.5181	10.116	7.45412	10.2009	11.2544	6.8783	6.89635
Pls3	14.0033	12.2032	10.1257	8.92781	4.66809	7.0007	5.8354	7.08538	6.97955	6.0864	8.11797	7.62637	5.65762	9.56881	5.82011	6.13564	5.92674	4.69824	7.90981	5.65845	20.3838	10.2085	11.2476	6.54043	9.28429	4.45764	21.8437	6.39093	6.85776	6.81404
Tmem55a	4.86542	8.71497	4.36485	7.05421	5.13769	5.75039	4.52917	5.84582	5.89236	5.86079	16.7497	6.8261	9.84721	4.4531	7.94576	6.30693	7.66726	7.51805	6.84847	7.97447	5.84525	3.43111	3.76496	8.62991	6.80235	6.60795	22.7014	10.4323	5.15256	5.39178
Pbxip1	9.24783	22.4002	5.64816	12.846	9.79385	6.18066	6.32916	6.31002	7.67699	8.52711	6.18695	8.96968	10.586	8.01461	10.3668	4.05383	6.04087	6.70933	5.3591	6.28132	6.39379	8.8683	11.5699	15.9301	8.42196	6.32881	5.28276	5.51688	4.5691	7.35824
Rnps1	9.48737	7.16883	7.96938	7.64357	4.0035	7.86629	5.93864	8.70752	10.4001	6.53762	7.43719	6.69748	22.4637	4.53106	8.2847	7.65088	4.72019	4.35593	7.03191	7.62355	6.48594	5.38206	8.9998	4.18328	6.93367	6.06274	9.66227	7.21306	4.72935	17.5564
Prelid3b	5.00286	5.008	4.21198	4.2056	5.10585	6.33252	8.49275	5.19799	8.39495	6.61454	6.41388	6.36404	4.83305	4.56516	7.6165	22.5618	4.77318	5.42138	11.714	5.42158	8.35098	11.2476	3.97986	5.00353	6.89866	6.01476	4.44581	7.54623	22.0114	11.2317
LOC100912115	13.697	10.065	13.69	6.01736	8.08261	10.0278	9.39051	8.66161	7.55391	10.291	7.06469	4.68252	7.62611	5.91961	8.68659	7.02722	6.95801	9.29379	9.69618	8.54031	8.35976	8.62232	8.5958	22.5181	7.75223	10.5553	8.82117	24.3478	4.51979	5.0305
LOC100910121	6.79352	4.60826	10.7854	4.68947	9.0417	8.34718	18.0538	9.0952	8.48213	7.13755	5.68172	11.1133	9.77095	13.2765	12.0131	6.8164	8.27053	11.1765	8.39025	8.84297	9.47878	13.2961	24.0296	8.77669	10.7288	8.78007	10.7313	7.8145	10.8927	10.4177
Ifrd1	11.7571	13.3572	14.1606	16.1312	8.34924	10.0936	9.27829	6.6926	5.71287	10.8294	7.78828	7.70258	6.64425	8.7844	9.59205	8.97727	6.70121	6.91472	8.06705	7.61478	10.3389	8.06248	9.99262	22.4015	7.75661	12.5137	11.3486	6.76738	7.60147	10.7287
Eps15	12.5739	3.68812	12.2578	5.85728	13.3317	7.29429	9.35908	9.36046	6.07185	7.40418	6.03282	7.38819	5.39547	7.75152	8.9529	9.09146	10.2556	20.6928	10.5653	9.25529	8.99168	6.10306	8.58291	10.9482	5.02079	12.1342	22.7925	8.23855	8.05345	8.3552
Chtop	7.11945	7.30836	8.4119	3.1251	4.63228	7.78024	7.70722	5.83562	5.30261	4.88655	5.28353	7.22147	9.41824	9.69061	8.38154	6.89546	15.3508	5.63105	7.58224	5.9655	11.5237	9.30515	8.72044	6.23823	9.32369	7.47157	4.35465	20.856	7.37548	7.93447
Mrpl32	3.85621	9.75956	11.59	8.1238	3.26727	6.88427	6.65685	5.77441	6.84109	3.87643	6.91055	9.66515	9.67563	11.8928	8.58491	6.45186	4.77726	4.68113	7.20225	23.2654	7.63569	4.21149	7.07864	5.83242	4.74939	7.81614	5.87111	5.664	5.07449	17.3323
Tspan12	6.21627	11.8638	13.1589	12.9697	21.4621	6.87415	6.77355	8.63611	6.09749	5.64543	8.57182	9.26501	8.41732	8.30207	5.7959	7.21168	5.58842	20.7741	4.95291	7.65865	11.3438	8.45267	10.0915	6.7606	11.0615	5.27764	11.013	11.0078	5.36212	7.50459
C1galt1	14.4431	21.5706	11.1756	9.63359	14.3107	12.4119	12.0479	10.3399	12.7847	9.76285	9.51806	11.2085	11.3438	11.5518	9.44195	9.56141	6.63599	10.248	8.05831	10.7467	9.94833	6.74771	24.7172	5.54749	10.1422	14.3761	14.0335	10.1381	10.2846	9.05947
Nrp1	7.26082	9.08077	11.0429	12.7441	11.7677	5.32012	7.94512	6.73851	8.0052	9.30137	8.58895	7.95505	6.76341	7.24969	6.37694	10.3124	17.2544	8.57494	6.91399	6.07077	4.12064	7.41782	7.12162	6.66131	8.82468	10.106	20.8824	12.5093	9.40939	5.48324
Scpep1	14.0033	21.5706	14.7842	8.92781	11.8593	9.38994	9.51619	6.44265	5.56928	9.50647	8.86725	8.92204	7.76433	10.5237	9.52426	8.39753	20.3074	4.71536	5.3591	7.51389	7.11348	4.95794	8.24767	9.57104	5.17399	14.3499	13.4783	9.21211	4.34311	7.68294
Gars	10.8343	4.11802	7.59122	11.8892	8.97404	8.30162	8.44786	9.47779	8.46161	22.351	8.69171	6.44502	8.80339	8.17539	9.22405	20.1945	4.65498	8.7247	9.27252	10.5844	9.72892	11.2476	8.87946	4.5157	5.95315	7.93391	6.41804	6.78901	9.80795	5.55184
Mrpl47	4.0447	5.03062	2.39363	7.09059	3.77666	9.59748	9.00896	22.3682	5.82569	9.73208	5.30494	6.79752	5.8578	6.83069	6.8902	6.00388	6.1387	11.8355	6.83537	5.16279	3.87489	4.32176	3.91968	4.45094	3.98336	5.71381	5.89598	4.44812	5.76068	6.07775
Srsf1	7.75168	7.9683	12.7003	3.95094	10.0645	7.86123	7.55909	23.4955	6.68211	7.05038	6.97049	5.93056	8.40302	6.79658	7.64071	6.90863	7.05991	7.97161	5.67794	5.93041	24.342	8.35088	5.16178	10.5338	12.3703	12.8888	4.28422	5.07553	6.25786	7.83843
Naa20	7.28045	21.3028	14.9049	11.4272	13.1009	7.58282	7.65784	7.12109	7.59494	5.6967	10.3359	10.1463	10.6289	6.37758	9.38868	9.02998	5.72293	9.44784	8.38152	22.5066	10.4486	9.60627	4.61594	7.34773	4.38607	8.21305	5.3822	4.88515	7.16593	8.03508
Mrpl55	4.95181	3.95587	3.91027	2.36838	4.15472	8.21557	5.54363	6.99867	6.65134	7.66568	6.55946	5.51137	5.61472	5.90012	19.6199	5.42413	9.56675	6.79491	4.51615	5.58827	3.73446	3.55835	4.73199	6.65267	17.7807	5.34306	4.12677	6.52939	4.7088	5.70275
Kcnq5	8.27788	11.8865	13.5572	9.89554	10.8644	12.007	10.185	11.2019	8.74367	14.0238	7.16317	8.57907	8.83675	9.43727	7.59713	20.5283	9.53006	8.19411	9.95824	7.98762	8.25444	8.04552	9.8164	9.62716	6.88552	12.7274	8.73831	23.2358	9.7833	11.4695
Bub3	12.1537	12.6746	15.4158	13.9047	6.57433	9.22796	5.83091	6.60078	8.28212	9.23471	9.17553	9.10782	17.8451	7.42509	9.55815	10.4793	11.0953	6.80775	9.36861	4.50483	7.56547	5.07245	4.37526	6.85558	5.60297	12.313	4.32979	7.86643	4.88959	9.13264
Dnajc2	9.77403	11.2944	9.09981	10.4558	12.9258	11.1667	7.58153	11.4009	9.54367	9.2142	6.58943	11.1656	7.29723	10.2119	9.31121	22.9439	4.5653	10.8171	6.29378	6.35589	11.6773	8.79196	11.08	4.65385	12.7774	5.53498	10.2133	12.4876	22.0114	7.61892
Filip1l	6.35763	4.86093	11.1394	11.3871	7.43393	6.1756	7.08777	7.24352	6.41031	8.88091	8.62748	9.93667	11.1913	9.87575	21.1064	6.14003	4.97699	9.07557	5.16693	6.10148	5.94179	6.93433	6.55	7.67151	10.9958	14.4633	7.02296	9.49337	15.8768	8.72563
Slco3a1	6.84457	12.8066	8.87051	9.77548	8.73925	6.72735	5.27879	6.71811	8.10264	5.79413	7.56564	10.1463	5.0237	9.71985	10.1828	10.9625	17.2096	7.21852	11.0414	8.60611	8.89075	5.02156	8.61729	7.93054	9.88399	22.8465	8.71345	10.5318	7.07142	5.0808
Hat1	5.46623	4.17459	5.85333	5.93005	9.09741	7.6385	6.0733	6.45795	7.81545	6.80938	6.91055	9.06495	6.81583	10.3678	9.57268	6.92181	4.61014	8.95148	9.43412	22.4101	5.35815	7.50689	6.94111	4.83517	6.06259	4.78041	7.4663	4.2361	7.64256	19.2074
Pxn	8.92582	10.774	15.2106	4.55486	11.6483	9.43044	9.58352	5.79991	6.09749	9.34752	5.56184	13.1711	7.50695	9.03775	9.74699	8.01103	19.0561	6.64943	7.57787	5.52247	5.94618	6.61624	7.7749	8.80691	5.5592	10.7777	7.66933	10.7698	6.05652	3.47562
Ncor1	12.7428	4.70631	24.1053	9.37165	15.7474	11.8906	9.97405	8.91157	10.0155	13.0804	7.4586	8.13606	10.8386	11.693	11.311	10.9669	9.77871	5.86639	10.526	9.29038	10.2906	4.5932	20.3162	10.3568	10.1422	13.2377	8.45242	6.71113	5.61276	10.189
Cltb	18.1894	7.19145	7.85674	4.88228	4.64422	8.45348	6.11819	9.82976	10.0975	8.87578	17.8972	6.82134	5.51463	7.50791	5.10349	5.65691	7.54497	11.4204	10.0805	9.75534	10.2248	13.0501	11.3508	5.27551	8.33004	6.95689	7.15969	10.1424	6.0935	8.69819
Ank2	6.92703	7.93436	5.72862	7.52716	5.02228	6.47931	20.0468	7.03947	6.92827	6.13767	6.41816	9.0316	6.96836	7.96589	9.96004	6.39038	4.34519	7.87748	5.08394	4.43903	8.5704	7.06156	6.47693	3.8336	5.26591	4.13488	3.69586	21.6219	6.14281	8.37806
Mapk1	8.7177	3.81256	5.64816	7.26158	7.44189	8.10927	5.52568	23.6588	6.40006	5.22497	7.88676	9.40792	6.87303	7.71741	8.17818	7.91001	6.86018	6.59808	6.25884	5.11454	6.09977	8.2915	7.54711	5.323	3.88706	24.5214	11.4522	4.70774	7.51929	4.87501
Krtcap2	13.697	13.9869	15.4158	21.279	9.98885	13.7078	9.90671	7.76893	11.4411	10.4346	6.93196	11.4658	11.258	13.5493	6.76915	7.63332	7.76509	9.435	5.93127	21.7609	8.06135	11.5657	9.04708	7.70173	9.97153	13.7437	12.9645	11.7823	5.41553	10.2668
Surf4	9.45988	9.42394	24.7409	13.2353	14.8758	5.56816	6.41445	6.85584	6.29749	6.45558	6.07991	6.68319	8.37919	9.23751	8.42512	6.73735	21.6281	9.37082	5.86575	7.24194	9.42612	6.93857	8.09724	8.53062	7.49835	6.30264	13.4493	12.1761	9.77919	12.2104
Mief2	14.769	10.2083	13.1428	4.26745	10.5898	8.98499	5.87131	8.5953	7.9693	7.65543	16.5485	9.85092	8.90825	9.1693	8.25565	9.21883	8.13194	5.05339	4.59913	8.49206	5.77942	9.78864	9.79491	8.60401	9.39373	13.6346	3.92374	6.93613	6.46741	21.8872
Atpaf1	6.37727	4.695	3.62464	6.81773	7.1275	7.98778	20.774	5.52956	4.79491	6.26073	9.0899	5.63999	6.52509	6.79658	7.99418	6.33767	8.76375	5.65244	6.9664	9.1237	7.09153	4.35145	9.6144	20.9121	5.43225	9.85741	5.12531	5.17938	3.64871	5.16312
Znrf2	11.7807	8.14931	9.57049	19.0089	7.60903	6.75772	8.03939	7.11599	7.85135	9.4193	6.3625	9.4889	10.1141	9.65651	6.47863	8.9597	5.18895	5.87067	10.1024	9.45707	9.42612	8.22789	21.4594	8.5263	9.98029	10.4986	6.16115	12.7775	7.48642	10.2256
Dstn	11.871	18.7461	5.59989	11.9947	10.8803	8.67114	9.62841	9.0697	12.0052	10.9268	8.28923	11.0561	9.67563	10.4799	7.33082	10.9317	9.7298	7.40252	11.714	9.38688	23.3503	6.34056	9.32644	10.7367	10.2867	9.81815	11.2823	8.23422	10.1901	10.9299
Maoa	13.9719	22.4606	14.398	9.34983	10.8803	13.2522	8.88327	7.51387	11.7488	9.99872	7.45432	9.10782	24.4703	7.47868	11.8194	6.5968	9.60343	9.46067	7.95349	10.8563	12.3839	9.68685	9.33074	10.2445	6.87239	14.4415	13.2918	10.5535	9.38063	11.0259
Ccdc6	10.9207	7.87025	11.6946	11.5399	9.10935	13.9052	10.2793	11.105	11.9898	9.63466	9.48809	11.3276	10.8243	11.5225	4.92918	19.3688	10.0437	9.81154	8.63484	9.56673	9.22426	9.17791	11.0499	10.9741	9.41999	13.7873	12.7698	7.67171	18.7777	10.2805
Hsf2	7.77917	7.56479	3.97865	6.76316	8.93027	6.85896	8.24138	9.63592	6.51288	6.42482	5.51474	7.09762	5.30015	10.4945	9.21921	5.7184	15.306	7.87748	5.26738	5.05313	10.2424	22.5037	10.9553	6.19937	14.3445	6.67774	4.11434	7.52892	6.51672	6.2241
Me3	5.90604	10.0349	8.05788	13.9993	23.619	5.53779	7.01146	7.70261	5.318	5.75311	8.41768	6.69748	6.64901	7.27892	6.81757	4.41836	7.83438	6.75212	4.68212	6.07077	6.34991	6.62048	4.53858	15.9301	6.07134	8.88475	9.74928	4.43082	5.42375	6.14178
Cbx1	6.21627	3.68435	7.80444	5.23154	8.33333	9.15203	5.33715	10.4011	6.70775	7.91693	6.44385	8.60765	8.7033	4.61388	8.96743	5.70961	21.0656	5.22883	6.52527	6.43045	7.10031	3.68134	3.87241	7.3909	5.09958	5.47392	19.0594	5.43034	5.01286	6.45276
Kdm7a	14.0033	12.8556	13.6014	20.1476	9.56701	10.2353	10.1985	8.1056	6.34365	11.3062	9.17125	11.0751	11.6679	13.106	5.84916	8.88065	19.9324	8.91725	9.89709	10.1326	13.5511	4.91553	9.49406	10.4474	8.89034	13.796	7.74805	12.5612	9.20394	11.3095
Gcdh	7.7831	5.91683	8.29121	7.40346	4.54871	9.27858	20.8728	9.69203	8.08725	7.87591	7.61702	5.08742	7.81676	7.04506	21.2807	5.23528	10.3698	6.40981	5.65611	5.08822	14.0602	7.99038	12.1845	9.45879	9.91463	4.78477	10.0435	8.64528	4.49103	5.72562
Nudt7	12.3422	14.5074	10.54	9.63359	23.4519	9.15203	7.70722	7.76893	9.06162	7.64517	8.84585	9.96525	7.05415	12.5895	11.0979	9.22762	20.2952	8.40806	8.80081	9.59305	5.34498	8.0752	5.58727	9.89051	9.69138	6.2503	6.76193	4.97169	7.26865	9.16465
Ostf1	12.3815	14.0888	11.248	9.43714	21.6372	7.36516	5.75011	8.05969	8.5129	7.26573	6.43101	5.79242	5.39071	6.67965	24.6507	8.7401	7.39416	7.6892	8.43393	8.77279	7.21441	8.39753	9.47257	7.96076	5.32282	12.5137	5.90426	4.21014	8.19726	6.11434
Rps6kb1	11.0895	10.0914	11.594	10.8996	10.5699	6.93995	16.7341	6.60588	7.01545	8.08614	9.63795	6.79275	8.89872	8.36053	7.12746	9.42526	7.74471	8.38667	10.1286	8.93509	6.28408	12.257	5.91391	19.1896	7.45895	11.5803	6.099	10.6184	6.56192	6.16465
LOC100910528	8.72948	11.087	6.45274	7.68359	6.90862	8.04852	6.95759	8.81465	8.31802	6.6453	5.80589	7.25481	25.9049	11.1084	9.51942	7.73872	4.59791	6.98746	4.94855	9.865	6.12171	3.82978	6.9626	6.67426	9.21863	23.9631	6.55062	6.95776	4.8937	6.99696
Tns1	4.99893	8.83188	8.14236	3.90364	5.53167	8.17001	9.71819	8.95237	23.831	9.44494	9.06849	6.32117	4.66623	9.54445	10.9623	21.758	6.47702	9.40505	6.75675	10.8388	11.7563	11.4088	14.4323	5.47842	10.5012	4.02584	8.556	4.30966	7.43711	8.32776
Tbl1xr1	6.05526	7.3687	11.4653	5.99189	8.01894	7.97259	8.40298	9.59001	7.48725	8.05025	9.37249	8.29802	9.86151	11.313	6.12516	19.1492	7.78139	9.33658	8.95805	9.24652	8.93902	8.57142	6.1417	7.71036	9.72203	10.7123	10.2423	21.4574	7.5234	10.8339
Six4	22.2458	7.19523	11.9802	8.7932	13.085	10.782	8.3536	7.35064	11.5181	10.2397	8.25926	11.6372	11.2056	10.9086	9.25311	8.5205	7.22703	8.65196	8.70036	9.65884	25.7288	12.3927	10.186	8.62127	13.4427	14.4633	11.158	8.83567	9.12998	9.05947
Metap1	16.5008	6.02242	6.23148	3.67445	7.67669	8.43323	8.88776	7.04458	5.97441	7.02987	4.9881	8.26944	8.42685	9.57856	8.94322	5.16061	7.49606	10.034	4.4288	6.43923	12.1995	11.8329	21.7302	5.74608	13.4427	7.85976	5.25376	3.35773	7.57271	4.97562
Ube4b	13.4457	8.60184	8.66534	10.8342	11.2186	7.25886	8.82492	9.83486	5.74877	7.92206	6.60655	8.94109	6.25341	8.58952	10.7251	9.20126	7.05991	5.91346	7.1018	9.78605	11.8046	9.64868	6.18468	22.8418	9.84897	8.37444	22.0177	10.3717	7.36315	4.82013
Ppfibp1	8.92975	5.32854	23.8478	11.1579	8.97404	10.2049	11.7516	7.41185	12.2104	9.568	8.91007	5.33512	8.79862	10.363	11.7129	10.0928	7.75286	9.15687	10.3994	9.76411	5.39764	8.2194	9.30065	18.3736	9.56444	12.9237	12.3554	9.30298	5.92504	10.5686
Pcgf5	13.9248	11.053	4.25221	13.5845	6.28382	9.65317	5.39101	7.20271	9.90778	10.7986	9.53519	10.0319	10.2809	8.65286	7.54871	9.71952	8.04634	20.6415	7.35512	10.2642	11.4009	9.75895	7.21188	6.42818	5.85248	10.7864	11.6138	5.41304	17.2327	6.85977
LOC100910519	13.8776	12.6859	10.0372	12.9806	21.3467	5.78582	8.08876	7.99337	6.75391	7.65543	7.21883	9.12687	9.1275	5.57856	8.16365	5.68765	6.58708	6.93611	5.31106	8.16308	7.99553	11.4766	7.65026	8.53493	24.3773	8.57071	4.75656	12.5698	5.41553	5.57471
Tpp1	10.2885	8.26621	14.4221	21.2026	15.7474	8.10927	7.97205	8.58	10.0924	7.90668	8.35346	9.54606	10.0522	9.89524	10.2409	10.1368	7.14143	6.79919	9.99318	10.1238	24.4912	11.8371	12.9066	5.71154	10.6588	12.9804	7.32543	11.9424	8.39038	11.4147
Clcn4	19.8269	8.31147	12.3906	12.4204	11.7916	8.46867	8.91021	9.5594	6.54878	8.57326	7.81825	11.642	9.65179	10.4848	10.5169	6.03462	7.08844	5.42138	7.84866	8.73331	19.8484	8.46963	9.75623	6.95487	9.39373	9.13337	12.2353	12.9809	9.98052	5.78964
RGD1309821	11.7335	7.26688	6.45274	21.1044	12.5557	8.69139	8.44338	7.07518	7.75391	6.18382	8.91435	8.58383	11.0912	9.13519	9.33058	10.3695	8.2583	9.06273	9.30309	9.80359	23.4424	8.13882	10.2978	10.3395	8.2031	8.89784	7.11412	7.94431	7.78226	6.92379
Ube2a	7.61424	13.1535	11.8153	4.46027	12.1776	10.1239	4.84787	9.15132	9.99496	24.8481	6.79923	11.5896	10.4382	9.41778	8.40575	6.01706	4.74057	5.94341	6.17586	9.66323	8.4212	22.8939	5.38097	7.80534	4.09717	4.85892	7.06025	8.23855	10.2764	8.17227
RGD1309676	6.14166	11.5395	4.11141	7.30887	10.944	6.47425	6.64338	7.20781	6.7898	6.32739	7.40294	8.09795	7.92639	7.71741	8.59459	6.74613	8.64554	6.99602	6.18022	6.52257	7.67957	4.33448	8.35082	6.78218	22.2674	12.928	7.42487	12.3189	8.99439	20.0397
Neurl1	10.4416	4.7214	8.81017	10.0665	6.42709	6.62105	5.60647	19.6952	9.1847	5.97359	9.42815	12.0278	9.58507	12.3995	8.23144	20.9806	8.44173	3.09793	6.91399	9.04913	4.38394	4.10546	5.60876	4.34733	9.78331	6.39859	5.37391	8.02653	8.53419	8.14026
Rpia	7.50821	6.08653	9.7475	18.867	7.54138	8.51929	6.49525	6.41204	7.27699	5.73772	5.07801	5.21127	4.76155	7.42509	6.13969	9.42526	7.51236	7.98017	6.27631	8.44381	11.3614	9.78016	7.86086	4.78336	22.7008	7.08774	8.39855	11.4578	8.99439	5.58842
Srp19	5.74897	6.87468	8.53661	5.11876	4.3935	7.75493	7.20896	9.17682	8.96931	7.75285	7.30446	4.9207	8.67947	6.45554	4.72097	6.50018	5.06259	8.64768	22.7904	9.9615	14.3147	13.3258	12.5456	4.3905	12.4929	6.96561	5.12946	21.6219	11.205	7.2119
Sptssa	14.4902	7.1198	11.9802	19.973	13.674	6.84884	5.61545	9.57471	6.45134	6.82476	7.23595	8.54096	9.48974	6.06577	5.30202	6.39038	7.04361	18.1126	7.09306	5.98743	7.7805	3.94854	5.05003	7.38226	4.14532	8.20869	13.789	13.7381	7.27276	4.73324
[truncated: 5,975 more rows]

## Sheet: local network _4 weeks
1	2	3	4	6	7	8	9	10	11	14	15	16	24	29	30	37	41	44	54	58	64	72	77	79	82	92	123	5246
[truncated: 5,226 more rows]
[truncated: 210 more columns]

[truncated: 10 more sheets: degree matrix_8 weeks, local network _8 weeks, degree matrix_12 weeks, local network _12 weeks, degree matrix_16 weeks, local network _16 weeks, degree matrix_20 weeks, local network _20 weeks, degree matrix_reference, local network _reference]
