# Supplementary material for: Detecting the Critical States of Type 2 Diabetes Mellitus Based on Degree Matrix Network Entropy by Cross-Tissue Analysis
Source: Entropy (Basel). 2022 Sep 5;24(9):1249. doi: 10.3390/e24091249 (PMC9498060; doi:10.3390/e24091249)
Supplement: Supplementary file 1 [file entropy-24-01249-s001.zip › Supplementary Table S4.xlsx]

## Sheet: Name
The degree matrix and local network for GSE13270 (rat liver tissue)

## Sheet: degree matrix_4 weeks
Symbol	GSM335062	GSM335063	GSM335064	GSM335065	GSM335066	GSM335082	GSM335083	GSM335084	GSM335085	GSM335086	GSM335102	GSM335103	GSM335104	GSM335105	GSM335106	GSM335122	GSM335123	GSM335124	GSM335125	GSM335126	GSM335142	GSM335143	GSM335144	GSM335145	GSM335146	GSM335052	GSM335053	GSM335054	GSM335055	GSM335056
Sumo2	27.2054	7.27689	8.57588	5.45508	6.1686	4.02571	7.23048	6.28234	7.4123	9.21148	8.61255	7.80075	7.89277	5.84292	7.57876	6.14485	9.84478	7.91461	17.0973	9.0123	5.76108	6.06682	6.02987	9.95386	5.36299	10.326	9.55415	12.1252	4.36686	6.9186
Cdc37	9.81283	5.49571	10.5832	8.02918	4.89363	5.40555	10.8868	8.94698	8.03153	23.2462	9.82319	7.27468	5.45717	4.65641	8.22761	9.1404	6.68908	5.66362	17.1639	8.71901	5.66641	6.50285	5.56287	9.06192	10.3032	4.71884	6.13672	7.76755	9.32372	8.30705
Copb2	5.31036	5.77765	6.94046	6.4948	5.10925	8.8338	6.10358	7.2005	7.42154	6.81621	6.74826	23.7795	4.45847	8.07357	8.78605	5.40588	5.39699	7.74424	16.2238	4.86857	6.13506	5.75739	6.28646	4.32637	5.78576	11.5609	11.2736	5.44377	9.15576	5.4546
Vcp	11.2607	5.28984	4.88834	8.71164	6.41234	7.69105	7.11924	8.00388	6.68216	5.98348	7.40652	8.36933	5.54889	23.1028	7.1001	6.14485	6.1623	6.30381	5.24082	6.70371	7.69249	6.66694	6.53278	5.17233	7.44359	11.8426	10.1747	8.84505	20.383	9.75688
Ube2d2 /// Ube2d3	6.94886	21.6159	9.23901	6.5635	10.0826	5.62367	7.24015	7.5448	8.78016	5.48759	8.12922	6.64764	6.71573	5.51597	7.25966	6.47218	6.22194	3.55719	5.54242	8.04864	4.19892	5.11507	6.25567	5.38382	6.84506	17.7617	8.02428	5.40916	4.51328	6.02603
Arf1	10.3348	4.67672	7.27202	3.92069	6.14516	16.0175	6.5969	7.67953	6.428	6.2595	8.59874	9.21955	8.91185	9.62395	8.84455	8.26257	6.83817	5.2919	16.8975	8.17433	6.24393	6.13246	8.3751	8.20676	7.13482	6.81611	8.97237	9.36433	5.08606	10.7203
Gdi2	8.90053	7.41562	5.18406	7.65818	8.10449	6.66684	5.94398	6.97595	7.09344	7.30275	5.98874	5.98341	5.89538	8.47962	7.41921	6.51682	6.10267	8.19857	16.6469	5.86155	5.67114	5.53703	18.1204	4.16545	6.65505	4.80117	5.80489	5.53465	5.08606	4.76038
Capns1	12.704	6.11778	8.97465	9.38035	9.68882	11.7594	9.48909	7.98891	23.4338	12.5751	7.75636	10.4417	9.9615	10.4624	7.44048	10.1869	7.24071	10.8987	9.3379	7.6548	8.57298	7.95157	6.50713	5.89875	8.28912	12.8306	24.4392	7.00161	7.41591	8.64235
Phb2	7.91108	5.06608	8.95225	3.5726	6.83889	6.9466	8.13973	10.2194	17.1814	5.8946	6.33398	8.79444	8.25964	7.82045	7.96701	6.6656	6.048	7.26409	9.91761	9.72457	7.2049	5.00255	8.10312	8.66193	8.25587	8.0294	24.4392	14.1677	8.74233	10.3472
Puf60	10.3575	23.9564	6.00849	5.94517	6.64202	6.59097	6.93062	9.24138	5.59157	5.45952	9.46874	8.68816	7.94882	9.49739	7.62131	7.81125	5.64547	6.83042	7.23844	8.23718	7.8345	19.6961	5.83486	4.72176	5.98527	5.06983	5.67561	6.05393	7.85087	10.4511
Prpf8	5.69616	4.85573	6.29525	4.52987	7.0592	6.43924	20.5742	9.06674	8.72932	8.8185	21.078	7.31719	5.50813	4.97281	6.89269	9.1404	5.7051	6.95433	6.86634	6.32243	5.60487	7.17329	6.15816	8.63434	8.15137	5.14783	3.36572	8.10941	5.90861	7.66005
Iscu	10.0171	25.6078	8.42354	12.9575	9.21071	7.92339	5.94882	6.25739	7.28753	6.84896	8.42382	9.25675	7.14375	8.51654	7.86596	6.73503	20.8574	5.76171	5.38183	5.2247	7.84397	4.22427	7.32821	6.74012	6.46979	11.6346	6.02468	8.5205	4.49175	8.37316
Eif4g2	6.67653	7.53198	5.54699	6.31617	8.89197	23.8318	8.11554	11.1725	6.24778	5.99752	5.12794	7.97079	8.50422	5.47379	22.2204	7.02765	6.49527	5.55004	4.53578	7.49977	5.2735	6.85448	6.3737	7.68723	5.02573	5.52915	4.64133	7.90602	4.73722	4.954
Sar1a	8.24695	7.09788	8.82679	6.29784	10.2279	6.57675	4.38181	7.28532	5.74407	6.66651	20.01	7.18434	7.00108	6.84487	4.02605	7.44425	10.4709	8.52899	8.21767	5.96211	5.44392	5.9543	5.90157	8.1286	16.3645	8.15073	4.48619	8.52483	7.21781	8.47706
Uba1	5.85956	4.54246	5.59628	6.87496	5.00613	7.01299	9.08767	7.49989	7.48624	6.93317	7.94049	8.27368	9.73731	9.53957	6.7225	7.57815	7.89173	8.99364	4.007	7.89781	5.86049	19.6961	5.23957	5.86197	7.72385	10.6423	10.7824	5.53465	9.83189	18.5598
Tomm22	11.297	4.63197	8.64757	5.75737	8.5451	9.71102	7.9511	8.26335	4.95848	6.43727	8.3962	8.7413	6.5323	8.08412	8.31271	7.03757	6.82823	7.23312	17.7279	8.91593	7.54101	6.89199	8.19549	6.27116	7.34383	5.79347	24.4392	8.72821	12.8163	12.2551
Sec24c	11.7827	6.11778	10.05	6.59098	5.92017	6.57201	6.67428	22.8839	7.82358	9.13195	7.40652	9.50119	8.45836	8.11048	8.27548	8.1733	8.91049	8.93169	5.94586	5.20794	8.44044	7.67964	7.11781	6.93782	7.18707	6.62978	7.43388	10.9525	19.8274	6.97055
Cdc42	7.12587	4.67225	5.08101	9.24753	7.38732	22.9119	9.06349	6.76138	8.31804	11.7798	5.77699	8.14615	6.41001	6.78159	7.36603	8.34688	11.2512	9.99523	5.08414	7.43274	6.13979	5.43858	4.60836	6.5838	21.1575	5.43815	5.05073	7.3478	5.18941	7.88201
Mrpl53	7.3165	9.21918	5.04516	9.57272	6.06548	6.04094	5.92464	7.66955	17.0335	7.6583	19.5359	7.04087	6.10938	8.65364	6.29702	6.56145	6.27164	4.39356	5.28782	5.44676	9.29253	11.0412	10.9872	5.21831	6.87831	4.27686	4.56807	5.3529	5.8397	4.79343
LOC100360065 /// LOC100363269 /// Nop10	4.73848	25.6078	4.4358	8.15743	11.7231	7.21688	8.85552	7.77933	6.67292	6.96124	6.78969	6.12688	9.54878	8.10521	7.85	5.8324	7.97124	6.11795	14.4416	8.05702	10.6795	7.05608	7.50783	5.73324	9.09666	5.36449	11.3685	8.92727	9.30649	8.13231
Eif4a3	11.9234	6.10435	26.6775	8.25819	4.89832	5.67582	7.71896	9.37112	8.24411	10.222	5.86906	5.04817	22.0325	8.27396	6.34489	10.3902	7.55876	7.26926	4.70029	9.16313	6.21553	8.22819	6.34291	10.0826	7.87586	11.6173	8.33457	8.65898	4.83197	5.22791
Tmem261	8.98223	5.06608	7.98892	7.66276	6.14516	7.43974	9.19891	8.46295	6.79307	7.09691	6.89557	6.53074	5.16164	7.04526	7.26498	6.42754	6.57975	7.63582	15.3229	5.82385	5.69481	24.9237	7.72849	7.13552	6.34154	7.24076	9.21801	6.11018	11.2703	12.7793
LOC498453 /// Tcea1	5.09704	6.7667	5.48874	8.47804	8.14667	6.40131	20.816	8.32323	9.62583	6.5168	8.33636	5.23415	7.34247	6.51792	6.5204	7.80133	5.55601	9.42216	17.0072	5.2666	5.94097	7.06546	7.84653	5.0298	6.94481	4.74918	5.23604	5.56061	4.94825	6.27161
Api5	5.09704	7.98847	2.94376	17.1897	5.44674	6.2306	7.42393	11.6465	11.4697	11.4243	5.22001	8.43841	7.67367	10.0036	7.35007	7.90052	5.91879	8.5548	7.19144	5.87412	17.9318	6.75602	7.36414	6.0091	7.28208	8.57105	7.15807	5.46108	5.73204	5.73795
RGD1560212	8.5919	4.92286	25.0376	7.94673	9.37008	9.04244	6.04071	9.37611	9.24689	6.34371	8.34096	7.73698	9.0749	5.69527	8.802	5.78281	8.6471	7.15051	9.3379	6.95091	20.9709	7.95626	8.57524	11.3929	6.62655	5.1435	10.3557	9.29942	8.19109	9.93162
Ptdss1	4.75209	7.85421	7.49157	6.32991	8.4701	3.82656	8.53148	21.5616	5.17105	6.89106	5.46398	6.00466	6.70554	6.09605	7.03628	8.15346	8.39366	5.7359	17.0973	6.5822	6.04038	3.22564	7.19479	9.04353	6.5458	5.19983	5.96865	7.52954	6.77423	9.26573
Shfm1	5.36483	6.44	5.55595	18.7744	6.74515	6.68581	5.68765	6.99591	6.64519	5.53905	7.93128	8.70411	10.3895	7.76244	7.41921	7.39961	8.48311	5.30738	17.0973	6.03334	8.48777	10.8115	8.09798	5.19072	8.8544	6.06647	5.89108	7.46463	5.49518	4.869
LOC100910272 /// Srp72	8.42396	4.83336	11.5644	5.15278	5.62486	6.41079	7.09022	19.8001	6.62209	4.97766	3.77461	7.49786	7.28642	6.17515	6.91928	5.68858	9.00989	7.87331	6.05162	6.59477	8.65819	7.4124	6.26593	5.08497	6.5743	6.1098	7.37786	23.0257	4.90949	4.29756
Bcap31	6.82178	25.6078	4.40892	12.5682	8.64822	11.7926	8.88937	10.8082	8.76629	6.60101	4.9162	8.40122	8.0813	8.65364	7.87128	11.2879	9.78514	11.3117	7.35203	7.63804	23.5035	6.24967	7.31795	7.47114	6.96856	10.6206	4.96454	14.0378	8.95335	12.6046
RGD1565784	11.5603	9.65329	13.6748	10.3605	10.6029	6.90867	23.2633	7.76436	6.428	11.4196	8.12001	7.63602	7.7501	8.88567	7.42985	6.29364	6.212	9.23629	7.30895	6.61572	5.05101	22.1153	6.60976	6.43668	5.82376	11.1103	11.4805	14.3234	7.00678	5.69073
Ncstn	6.83993	5.63892	8.60724	8.90401	9.17321	9.7205	6.55337	5.52387	7.31988	20.7293	9.02224	7.68916	5.4266	8.11048	7.39262	7.57319	8.93534	7.13502	8.70337	9.67848	7.76823	3.7273	8.55985	5.18612	11.3293	6.82044	6.7185	19.8278	7.52357	5.76629
Chmp5	5.7007	25.6078	5.26023	9.03683	12.4122	6.02197	7.56419	6.8512	5.87808	8.72494	5.28906	6.4404	9.20229	8.37415	8.30207	10.3456	9.16891	5.52939	15.3621	6.65343	6.72679	11.3554	6.45581	6.31714	6.44129	6.02747	6.22291	5.34425	6.53306	8.8407
Tm9sf4	4.73394	10.2575	6.25044	9.01393	4.92644	16.6529	7.18211	7.7444	9.01121	9.93661	6.27414	8.56595	7.83163	5.85874	5.99387	7.07228	5.29759	6.27283	15.2524	5.93278	9.24046	8.58451	6.88175	6.51943	5.70026	4.63651	7.56317	5.75101	4.63817	8.75097
Apoa1bp	5.0335	6.66377	6.11154	24.0097	8.33417	7.07937	21.2223	10.0997	6.65906	6.78346	7.47096	6.65296	7.1947	6.59702	8.5414	8.85275	5.37711	6.53614	8.56627	8.60169	9.39194	10.9193	4.27992	5.79301	6.26078	5.36449	4.99471	5.45676	9.25051	10.8478
F8a1	24.1009	11.3718	4.34619	8.38186	27.0462	5.66634	6.58723	6.81627	4.82447	6.5823	5.77699	9.6978	9.25324	6.79741	7.86064	9.75043	7.31525	8.95234	6.15738	6.17579	5.84156	5.28855	9.08842	6.94242	8.20837	5.71548	4.55945	6.01498	5.85262	5.75212
Zfp592	6.46321	5.55389	4.92867	6.25662	4.83269	6.53407	8.2026	7.99889	20.1158	5.84314	6.20049	6.87614	4.15275	5.61617	8.23293	6.19941	7.02702	8.72001	6.3258	5.04873	5.53859	5.7105	7.37953	5.47117	6.36529	6.28746	17.475	4.33598	6.29189	5.86546
Thrap3	5.69616	5.21376	4.92418	5.73447	5.36706	9.59248	11.0803	9.05177	8.59531	8.82318	6.14985	6.01529	21.3548	5.60035	5.99919	5.59434	5.90885	6.95433	5.91061	7.4872	5.92203	4.99317	6.36857	5.20451	9.21542	5.88447	6.28755	6.27029	18.1952	3.2397
Mrps26	5.78693	5.96114	8.79095	5.06118	5.88735	6.97979	3.89333	6.07277	6.33096	6.65247	5.81842	5.45734	7.42399	6.52319	7.48303	16.5995	6.13746	6.96981	3.67406	6.97605	6.11612	5.8324	7.0357	7.29643	6.15628	11.5306	12.4717	12.7786	20.706	5.33181
LOC686774	9.4588	25.6078	5.83375	11.8216	8.48885	7.72898	5.6006	7.39011	6.11376	6.83493	8.32716	7.97611	22.7153	8.56927	6.50976	10.782	10.4908	6.55679	8.99713	7.15202	7.1765	8.04065	7.03057	4.62521	7.73335	9.44635	8.64485	14.3494	10.4219	6.05909
Fbxw8	6.13642	6.13568	4.78529	4.76346	5.78892	6.26854	5.56674	3.89715	7.09344	19.6767	8.65858	5.73897	8.07111	6.62866	7.0416	8.5651	6.36606	6.93367	4.6572	5.36716	6.47116	4.18677	22.272	5.47117	6.14203	5.78914	9.3947	5.07595	8.60021	7.797
Eif4h	7.97916	7.80498	7.94859	8.28109	8.78416	11.5603	8.89905	7.98891	23.4338	11.3401	6.31556	6.12157	6.9756	8.38997	7.71172	7.965	5.85916	8.88522	5.91845	9.51088	9.73751	19.668	5.70656	8.75388	9.20116	6.68178	11.3771	4.323	8.18248	9.98357
Dazap2	6.74915	7.65729	6.84636	5.8673	6.91389	7.02247	7.04669	7.1506	7.68495	5.73086	5.83683	7.64665	6.06862	8.43743	6.4938	8.33696	8.98007	6.79944	8.4331	6.05429	25.1083	7.56712	9.71963	6.76771	11.5193	23.1999	6.3996	6.13182	7.40729	7.80173
Rabgap1	8.58282	6.86516	10.1665	7.41085	7.767	7.31171	8.89421	6.76637	5.97051	6.34371	9.19255	9.93692	21.7675	9.58704	7.37666	5.77785	7.13138	8.9162	4.26159	9.19246	6.45696	6.5216	19.9627	9.17686	6.08502	3.85221	9.92908	8.87534	9.20744	5.83713
Irf2bp1	5.0925	25.6078	6.70298	12.4354	8.48885	9.24633	6.71298	7.3951	8.67849	6.87235	5.47779	5.54767	6.11448	6.61284	8.58395	5.89192	5.61565	8.81294	8.26859	5.31688	6.45696	23.9063	6.74832	6.55162	5.439	4.20753	6.97707	7.45598	4.86211	5.19958
Apip	6.69923	5.03922	6.61785	5.29935	5.48424	18.0185	6.10842	5.91808	6.85314	7.52731	8.18906	3.94289	5.62022	6.29644	8.26484	6.08534	6.72884	5.93725	6.00462	6.20512	6.27234	5.79021	8.94473	5.75623	9.25817	25.0762	9.3473	11.8222	9.75007	6.86193
Sys1	7.83392	5.68367	8.20399	6.60014	6.44515	21.3709	6.46632	6.35719	9.31621	7.71911	5.67112	10.835	7.15394	6.64975	7.45112	5.37613	5.21311	6.58776	18.0804	5.81966	11.2997	7.56243	5.42432	10.9194	7.11107	9.09103	7.75709	4.799	6.13255	5.3082
Rnf111	6.99879	5.01237	11.5958	5.97723	5.84986	5.90817	7.34171	6.85619	7.11193	7.40099	5.83683	10.4152	7.60233	5.38414	6.1747	7.56328	10.8387	10.687	17.0072	7.07241	6.25814	6.41377	5.93236	6.1884	6.43179	4.74484	4.34397	7.52954	4.42715	20.6897
Zmym2	7.5616	8.05112	8.55796	7.07649	6.44984	5.79911	6.04071	7.87913	6.00285	8.20097	8.32716	5.97278	7.34247	7.83099	7.05224	10.0083	9.65593	10.4341	8.42918	6.33919	7.54574	5.39638	7.24611	22.2065	8.36038	5.79347	22.6938	7.14008	7.06277	12.5102
Ap3d1	6.46321	8.64186	7.41092	8.15285	22.8135	6.93712	8.62337	6.02287	6.06755	6.02559	8.9716	6.5945	8.89147	10.0616	9.32853	6.88878	9.76526	9.07625	17.3676	7.38665	8.01439	6.0762	6.67648	5.96312	6.42229	8.14206	7.06757	4.2278	6.76131	7.81117
Tm2d1	18.4864	10.1098	7.45573	6.74213	6.95139	9.62567	8.44926	5.02488	7.76351	8.53313	16.553	8.70411	6.96541	7.31947	8.86582	5.75801	7.59355	7.17633	7.95915	6.35595	6.70312	9.08148	8.24168	9.24583	6.08502	5.9148	7.81312	8.29981	5.55978	8.53845
Alb	5.57361	7.07102	5.39913	6.41235	5.4983	6.10258	5.76987	5.81828	8.91879	23.017	6.44906	5.43077	8.12716	4.32946	6.97778	6.56641	8.01597	7.01112	5.42883	6.01239	8.29369	10.1458	8.63682	5.25968	6.02802	9.76268	6.50734	5.87651	6.78715	15.3957
Gapdh /// LOC307738 /// LOC685186 /// RGD1564688 /// RGD1564958 /// RGD1565238 /// RGD1565368	4.62047	6.8204	6.48344	7.6994	6.26235	10.9581	6.15679	8.6376	23.2258	8.10741	6.48588	7.91765	8.09659	21.853	7.89255	5.50507	10.133	8.07466	5.16248	6.85873	5.50072	5.13852	6.86122	6.71713	6.18003	7.07177	6.67972	4.1802	6.84313	4.84538
Ftl1 /// LOC100359668 /// LOC100360087 /// LOC100362384 /// LOC100363177 /// LOC100364138	10.3121	6.52503	9.49888	7.09481	7.76231	7.12205	8.61853	9.21144	20.9106	6.01155	8.29033	9.91035	8.23416	8.82239	7.78086	10.9159	10.128	6.71684	17.5086	5.05711	6.32914	7.11703	9.00631	7.04816	7.97561	5.94947	5.15416	8.12671	5.78803	5.53016
Rplp0	11.0519	9.72937	7.16897	13.0262	11.7278	7.27852	8.50246	7.0009	16.0169	7.91092	8.70922	6.64233	8.65199	21.0725	6.57358	10.4348	8.37875	10.5115	6.52557	8.55142	7.38479	9.75193	8.69327	9.96765	8.56464	9.99233	9.48951	6.05825	4.72	9.16183
Rpl27	7.59791	9.96209	7.82314	7.7452	9.67945	6.65262	6.51468	6.85619	6.11376	6.29225	15.7015	5.93558	7.99977	6.95561	7.20647	10.6481	9.02976	9.7629	7.3442	5.51799	5.62854	6.84979	6.80477	8.18837	7.88061	4.13386	6.6237	6.18375	20.5811	4.90678
Sparc	7.16672	12.6518	5.66348	25.2784	8.62947	6.7759	7.81085	7.40009	8.76629	8.6267	5.62509	4.51147	7.36795	7.98392	8.5414	8.59982	8.03087	6.94916	7.57138	8.24137	7.14336	8.59858	10.6023	18.579	10.4932	9.62401	7.46836	10.9351	10.1936	10.6117
Fth1 /// LOC679217 /// LOC689130	5.56907	6.95466	5.02276	6.39861	5.72798	10.9581	6.3841	11.2623	8.48903	23.017	7.2408	7.46066	8.00487	8.8013	5.99387	6.83423	4.95469	8.4722	4.96664	7.8601	6.21553	5.50421	5.79894	5.97232	8.63114	6.83777	10.179	5.52599	6.95511	15.0604
Rpl6	9.14109	3.03427	11.8602	6.89328	6.71702	9.13727	5.89562	6.77635	6.1877	6.59633	6.78969	7.25342	7.14375	19.4377	5.98323	7.44921	6.48533	9.32406	7.10527	6.20931	22.6041	8.24226	6.29672	5.63669	5.70026	13.6755	12.8423	11.7876	4.7243	5.2468
Mgp	6.96702	10.3604	9.49888	9.56814	10.7763	11.6741	8.51697	12.1156	10.4299	7.36825	8.61255	8.80507	7.91825	9.82961	8.33398	10.7671	10.2026	8.88006	7.96307	7.51234	8.73393	5.56047	7.21531	9.99984	21.0672	10.1093	11.1659	7.86708	19.6595	6.64941
LOC100359969 /// LOC100910498 /// Rpsa	6.85355	4.74833	11.6809	7.04443	5.09987	6.62891	7.01767	8.84219	5.28196	7.30275	9.17414	6.63701	6.80745	8.4849	6.68527	8.99162	6.40581	6.63939	16.8897	9.37262	6.59897	6.67632	6.74832	9.76536	5.648	13.8402	14.6652	9.56771	23.7033	10.1489
Tagln	5.09704	7.7647	8.22191	7.2597	5.6483	7.55828	9.29563	6.01289	6.76072	6.12851	9.46874	6.12688	8.75389	8.83821	8.0787	6.00598	4.46767	7.33121	7.89648	9.65334	20.9141	7.27644	9.26804	9.82513	8.59314	11.9813	9.4852	7.78053	11.0722	23.0038
Myl3	9.08662	7.25899	4.34171	7.70856	7.38732	8.80061	24.6852	6.98094	5.91043	5.87588	4.51112	5.93558	6.43039	6.49682	6.79164	8.21793	19.4908	5.82367	7.73589	5.75681	5.89836	7.45929	6.46607	4.91946	6.01377	4.51518	6.03329	6.17942	6.14978	7.51365
Vim	5.22413	9.51903	7.9934	23.0112	5.9811	10.8917	9.26662	8.65756	6.6683	9.15066	8.88874	9.14516	9.75259	11.1163	8.69563	20.7755	7.74264	8.66838	9.30265	8.90336	6.90194	11.1585	8.79591	8.93319	11.6048	11.8123	12.2002	11.8482	13.3504	9.74271
Eno1	6.61753	12.9695	8.51763	8.67499	27.0462	20.2566	5.6538	7.2454	9.41325	9.18341	5.33509	8.27368	8.32588	6.77104	8.3978	8.7238	8.33402	6.85623	6.18088	7.11431	3.48411	7.43116	8.57524	8.61595	9.31042	14.0005	9.94201	7.50791	7.51927	7.92452
Gpx1	5.81417	8.83878	5.08101	8.62919	6.98889	9.14675	5.31525	7.85418	6.47883	20.4814	6.83112	6.92928	7.50043	7.6517	7.69045	5.28189	18.5416	7.87847	5.66776	6.92996	9.04163	9.29246	6.83043	7.3654	6.31303	7.74341	7.19686	3.98547	5.93014	3.07441
Hspb1	10.1215	17.9058	12.1783	8.47346	8.6951	7.2643	6.13744	7.45997	7.51859	5.94606	8.04636	8.18866	8.64179	7.47768	6.91396	8.64445	8.99001	8.26052	6.5804	7.2819	5.95517	7.71246	26.0336	7.81137	6.35579	5.85847	10.2781	5.86785	8.92751	7.78284
Prdx2	13.462	9.72937	14.0557	10.7407	12.8762	8.69629	6.93062	9.94497	11.6175	10.4699	9.72192	8.02393	7.85201	5.67417	8.3978	7.90052	7.30531	7.77521	15.7068	6.89644	9.73277	5.16665	8.13904	10.786	9.49093	10.6206	7.38217	13.8734	22.7344	12.4865
LOC100909441 /// LOC100910937 /// Tuba1a /// Tuba1b /// Tuba1c	14.3652	23.4418	12.9489	7.07191	10.7013	9.52609	8.65239	11.2923	11.2571	12.5751	8.44223	8.5872	8.34626	9.32864	8.5414	9.04617	10.0933	9.96942	18.0804	8.70225	10.1778	11.4351	7.59507	7.06195	8.65489	12.7266	7.70969	13.8734	6.30912	12.5196
LOC100363537 /// RGD1560124 /// RGD1566137 /// Rpl10a	12.5452	7.0397	14.0557	6.73755	6.23891	7.02247	6.26802	6.75639	5.66089	7.17176	4.17509	7.30656	7.531	7.09799	6.69059	6.53169	7.59852	19.3245	7.21494	5.71072	6.8688	6.74665	6.37883	6.65736	6.90206	10.235	14.2989	14.3234	24.7585	10.3378
Spp1	12.7812	12.5712	8.19503	10.6216	8.4701	8.05142	8.32835	7.01088	7.26442	7.84075	7.70112	9.60215	6.24186	9.77688	21.0025	7.90052	9.29812	8.10047	4.32426	6.74142	7.05816	5.6308	9.21672	8.10102	9.42918	20.379	10.0368	8.05315	4.45299	5.8513
LOC100365570 /// LOC684399 /// LOC686807 /// RGD1562139 /// RGD1565306 /// Rpl29	9.44972	9.8502	6.07122	6.81999	6.59046	6.27328	6.3309	7.56476	5.88271	6.45131	7.03366	6.86551	9.44177	7.47768	8.32866	7.28058	11.778	26.7228	5.70302	4.93979	5.50546	5.55579	8.45721	6.13783	8.73564	24.8725	14.3075	7.91468	8.95766	6.17715
RGD1565798 /// Tpt1	6.6493	12.7592	6.33558	11.5651	11.8919	8.97605	6.29221	10.7334	8.48903	23.6018	7.11192	5.88776	8.62141	9.36555	8.79137	5.94151	8.11536	7.46028	3.35287	7.902	7.87238	8.19537	6.33264	9.12169	7.29633	9.52435	8.66209	5.0197	6.84313	15.3343
Anxa2	5.44199	25.6078	9.3331	13.2415	9.16384	5.93188	6.69363	5.45401	6.66368	6.75539	7.28223	9.11327	8.8609	7.80463	8.99878	8.08403	10.4859	10.3308	17.2344	8.44248	8.33156	4.93223	10.4997	7.1631	10.555	9.58935	6.15396	7.8714	8.58299	12.0237
Atp1a1	6.70831	5.10188	9.65122	6.41235	6.82483	22.9119	6.5969	6.35719	6.79769	9.51088	5.37191	6.33412	7.80105	7.20346	7.97765	5.39596	7.40967	7.24344	5.515	6.5026	10.9967	9.00647	8.40076	8.74928	8.01836	10.235	24.7796	10.8616	14.0265	8.0048
Ldha	8.45573	4.80651	9.66018	7.64902	9.07946	10.9818	7.22564	10.7833	23.4338	8.10741	8.51589	6.5945	5.84442	6.90815	7.26498	7.09708	7.2258	7.47061	6.70183	7.8182	5.9599	8.13911	6.85096	8.45503	8.04211	12.5836	14.6652	9.32971	9.59072	24.1466
Ran	13.2214	13.3007	14.0557	9.88876	11.8872	6.92289	6.98382	7.41007	6.76534	4.36481	6.49969	9.40022	7.76029	23.9623	8.05742	6.49698	6.74872	8.72001	9.11464	6.58639	5.63327	6.28718	7.56428	9.08031	8.23687	25.0762	12.9156	14.2932	9.75007	11.8679
Sepw1	9.64943	23.0838	8.07405	8.83072	10.9497	9.05666	6.09875	8.36814	6.59898	7.86882	9.57462	9.11327	8.04054	8.16322	8.56799	7.76662	10.1728	9.61318	6.741	8.53885	6.01671	7.56712	10.5099	21.4295	8.9684	8.27206	7.92085	6.14047	8.88445	8.03786
B2m	8.49204	10.1501	6.70747	6.89786	8.91541	10.9581	6.30672	11.2623	8.48903	23.017	6.32017	5.60081	8.17302	9.69778	6.82886	5.94151	4.14962	7.31572	7.42254	6.67019	10.2014	7.34677	7.0511	7.23207	7.57184	6.25713	5.14985	4.62158	6.84313	14.947
LOC100360508 /// LOC100361756 /// LOC100361854 /// LOC688948 /// Rps26	6.92617	10.4544	7.33475	10.6674	10.4622	9.24159	9.08767	6.56677	8.45668	5.787	8.93938	7.27468	9.66087	5.80601	8.18506	9.84962	9.37267	22.2415	5.53851	5.59341	7.03449	4.9838	8.18009	5.46198	7.34383	10.235	12.5923	9.122	24.7585	4.96345
Rps8	11.1155	5.70157	8.63861	8.02918	6.3889	6.65736	9.70673	7.82923	7.01488	6.43727	7.12112	7.18434	8.89147	9.67141	9.46149	8.65933	7.98118	9.4996	5.7226	6.84197	7.8203	6.15122	8.81644	22.3904	7.41508	10.6033	12.8552	9.56771	23.7033	7.12167
Ttr	5.83686	6.7488	4.60606	6.65968	6.54828	8.33592	5.90045	8.31325	10.9521	23.017	5.4962	6.99836	8.10168	20.8299	7.26498	5.22238	6.16727	7.24344	6.57649	6.69533	6.24393	5.56985	7.29742	5.9953	5.94727	4.66251	4.47326	5.4957	4.51759	3.12636
Des	9.41795	5.33012	6.815	7.50703	7.14826	4.41453	21.9139	5.46898	5.42059	5.88056	6.15906	7.07806	6.24696	7.77826	7.67981	5.25214	20.3008	7.36219	7.15619	6.49422	5.35871	7.88593	7.03057	5.79761	4.51745	6.06647	7.32183	4.76006	4.63817	6.59274
Cited2	9.62674	8.15853	9.56161	5.38637	8.4701	8.46869	6.1326	8.48291	5.8596	8.45828	8.17525	10.2239	7.06732	9.60286	22.7788	5.96631	9.85969	10.083	7.90432	7.08079	5.21669	6.75602	6.51226	4.13327	6.73105	25.0762	7.07188	11.9997	6.74839	10.0639
Crip2	4.43892	7.55883	6.3535	5.98181	5.56393	17.8952	5.73118	7.05579	5.97513	6.96592	8.04636	8.51281	8.28512	7.38276	4.76	5.14799	7.72773	8.3741	6.43156	5.67301	6.27234	3.76481	6.4712	6.36771	7.36283	6.80744	8.46385	6.38713	20.2581	9.78994
Pfn1	6.83539	9.53693	6.9763	9.97121	10.9544	6.21638	5.99235	7.01587	15.7442	6.34839	9.72192	9.44273	7.55648	7.889	6.02046	6.29364	6.77854	5.58101	17.3676	10.9145	7.21437	6.85917	7.6156	7.17689	9.17741	6.75978	9.72653	9.30807	4.7846	4.869
Rps3a	12.5452	4.16653	9.79908	5.64287	6.74046	8.73897	7.2208	8.01386	6.43262	7.54134	7.13493	10.5108	9.02905	8.18959	8.16911	6.13989	7.09162	15.504	5.87928	7.24419	17.3685	7.21549	7.13321	7.28724	5.41999	9.86667	6.48148	7.89304	4.55635	6.1866
Mif	5.26044	9.1073	5.78894	9.98953	12.7966	6.87074	6.97414	5.99792	3.97418	7.1203	5.07731	5.66458	6.5272	7.22983	8.35525	9.4231	6.36606	8.78197	17.3676	8.03188	7.94812	8.06409	5.31655	10.0596	8.08486	5.78914	7.60195	5.6385	16.9593	7.64588
Rpl19	9.05485	9.20576	10.2023	11.1208	7.75293	6.34915	5.76503	10.7583	6.32633	8.82786	8.74144	8.89541	8.8609	5.09937	8.63181	6.62593	7.67306	9.21048	16.8897	7.62547	7.06762	4.91347	7.15373	7.84815	6.77856	6.27013	9.60156	6.86746	14.7285	5.69545
Mgst1	6.64476	7.89448	5.09893	6.16502	5.203	11.1003	5.23786	8.45297	8.48903	23.017	6.01175	6.00998	4.30052	8.1474	5.9726	4.94961	7.34507	9.39634	5.53459	6.9132	5.8747	6.22154	7.59507	5.56313	8.7784	6.20513	6.48148	5.49137	4.59511	15.3957
Prdx1 /// Prdx1l1	5.17874	5.20034	7.28994	5.95433	5.17487	5.83704	6.41312	8.07873	5.73021	6.61505	19.4254	6.71672	6.65969	8.07357	6.84482	5.14303	6.47539	6.82009	6.01245	6.39785	8.00966	5.34012	6.04013	7.87114	6.93531	10.3477	8.39921	4.799	13.6131	5.1004
Anxa1	10.1169	12.0521	11.7168	13.0262	11.3669	11.2141	11.3995	9.94497	5.93816	8.70155	7.41112	7.98673	8.28512	8.56927	9.16897	9.40822	20.599	9.31374	7.87298	6.83359	6.5611	10.9334	8.78565	9.37456	8.52188	25.0762	12.0321	14.2932	8.50116	12.2268
Aldoa	5.29221	5.05712	8.28464	6.82457	7.5045	6.38708	24.6852	6.0079	8.76167	5.99284	9.04065	6.45634	6.10429	8.1474	5.91941	7.05244	8.25948	5.92176	8.60544	9.64915	5.76582	23.9063	10.202	7.97228	10.5692	4.63218	13.2819	9.65859	12.4589	10.0639
Gnb2l1 /// LOC100911540	5.11066	6.46685	8.77302	10.2964	10.3122	10.8538	8.50246	21.5416	11.1785	10.8161	9.30763	9.44805	8.66727	9.4552	7.27561	9.15528	5.56098	9.26727	17.3676	7.26095	10.476	9.77068	6.10685	5.97232	8.44588	10.0443	9.22663	6.7463	3.57014	8.71791
Pgrmc1	4.88372	6.12673	5.06756	5.23981	25.1244	8.59672	7.61739	6.24243	11.0029	8.67348	6.10842	8.40122	8.66727	6.0855	7.97233	6.71024	6.45054	8.03852	6.82717	6.36433	8.51144	8.61264	7.07676	6.12864	6.85456	4.42419	19.9142	4.45714	4.88795	6.59274
Atp5h	7.55252	11.9133	4.93315	25.2784	9.16384	6.13577	6.93545	7.07076	7.44927	7.03141	5.15096	6.70609	7.51571	7.12963	7.81809	5.21246	5.4765	6.61358	9.09897	9.07933	22.6041	6.03869	7.68231	9.24583	7.8236	7.56142	4.21038	7.98824	5.27124	6.70136
Rpl18	4.84287	4.26499	4.92867	6.49938	5.49361	7.34965	7.04669	8.07374	5.82263	7.54134	6.44445	7.98673	7.70424	5.65308	7.98296	7.76166	6.36109	6.29348	4.67679	6.52355	7.26171	7.26237	7.36414	14.4274	7.11107	4.37219	7.27874	6.26164	21.0419	4.83122
RGD1561736 /// RGD1563861 /// Rpl10	8.79614	11.5508	6.55512	11.5697	12.4075	8.63939	8.86519	6.68653	20.9106	10.8161	5.03128	7.80606	7.81634	8.0683	8.52544	7.86085	21.086	7.04209	5.91061	7.60452	6.18239	6.87323	6.55844	7.46195	9.20116	6.41312	7.33907	8.62868	3.41941	4.93039
Ckm	5.39206	7.89001	8.04269	6.4948	5.62486	4.62317	22.9924	6.80629	7.38457	8.50038	7.6689	7.44472	5.72213	4.52457	7.48835	5.50011	20.3505	6.35544	7.49304	5.40486	9.51502	9.34404	6.34291	5.00222	5.91402	4.49352	7.16669	8.19595	7.26518	5.92213
Gatm	11.7282	5.61654	8.54451	10.1315	9.68882	6.70003	8.86035	9.25136	10.9752	9.32375	9.30763	8.19398	8.4125	7.44076	21.7152	4.76114	8.25451	6.6807	5.81661	8.27908	7.69722	6.11371	5.34221	8.48262	6.82606	21.7136	12.7259	12.9906	11.2703	12.1701
Lgals1	27.4913	7.69757	9.1718	8.99103	5.95767	9.59722	8.24613	6.92605	5.85036	7.49456	18.0813	8.4703	8.38702	8.24232	6.7225	9.04121	10.7642	7.48093	5.60118	5.85317	9.43928	8.54231	10.7306	7.92631	10.3602	13.8402	13.6697	14.1677	11.6708	13.6861
Ctgf	6.68107	5.71052	8.56692	7.06275	5.36237	5.89868	6.26319	7.57973	9.62583	8.40214	6.46287	6.80174	5.50303	6.74995	7.96169	8.38656	4.20428	9.60802	8.28426	7.08079	8.48304	19.1475	9.40659	7.17689	9.91845	5.78914	20.8838	6.87612	6.02919	8.28343
Glul	13.1216	10.517	13.3388	9.8338	24.1541	9.65412	11.9073	10.6136	12.9392	8.66412	8.33636	8.14084	8.5297	7.60951	8.75945	9.42806	8.09548	8.7355	7.99832	18.8039	10.6937	10.3192	7.96969	9.13548	6.46029	9.20369	7.79588	10.801	5.50379	11.15
LOC100910017 /// Rpl31 /// Rpl31l1 /// Rpl31l2 /// Rpl31l4	8.1471	5.65682	4.86594	10.8415	10.0404	6.78538	3.68537	6.16259	7.01488	6.40453	9.04065	9.69248	8.44307	8.21068	8.74882	7.30538	11.1866	26.7228	8.65636	6.48584	7.53627	6.90605	6.06579	9.31939	8.54089	11.7299	12.9156	12.8478	20.4648	11.882
Igf2r	4.32999	8.74927	5.99057	25.2784	11.0529	6.58623	6.77585	8.48291	6.7561	6.12383	17.8649	6.37663	5.68646	6.38608	6.80759	8.57502	5.01433	7.67712	5.85186	6.22188	6.44749	8.68297	8.3751	7.02057	3.81917	8.28506	4.74476	5.79861	9.12561	5.67656
Mlycd	5.04712	5.58521	4.69567	5.04286	5.95767	9.82008	5.49903	25.4388	6.27088	5.70747	5.60207	6.36069	6.10429	16.4688	6.14811	6.48706	6.6046	6.00437	7.68889	5.56408	6.45696	8.17193	7.39493	9.16307	5.86651	3.89554	4.83525	8.62868	5.58562	4.57147
LOC100363271 /// LOC679871 /// RGD1562399 /// Rps2	7.80669	25.6078	5.56491	7.7452	10.8794	9.22262	9.18923	6.18754	8.59993	6.08173	7.10271	6.63701	5.74761	5.95894	8.50949	9.03129	6.86302	8.85941	9.569	7.88105	22.6041	5.02131	7.54888	7.72861	7.36283	9.94034	9.86875	5.4005	9.90941	8.78875
Sod1	4.57054	5.18243	6.94942	6.87496	6.99826	8.87648	6.73716	6.44202	6.47883	20.4814	17.4599	6.46166	4.54509	7.31947	6.47785	5.68858	8.82104	8.5961	7.93957	6.82102	5.14568	4.65561	8.0364	8.88261	8.98266	6.30479	7.79588	4.88988	7.26087	4.86427
Bsg	5.27405	12.0968	7.33923	8.4185	8.53573	8.34541	6.63559	9.08171	11.1693	10.5307	6.15906	6.86551	9.69145	9.0597	9.36044	9.72563	11.9767	9.59769	15.7068	10.1854	5.04154	5.88398	9.71963	9.58605	9.56218	10.235	14.2989	11.7487	24.7585	7.01305
Adcy6	5.28767	5.50913	20.6153	5.22607	4.59832	17.7292	6.46632	7.33522	6.26164	7.07352	5.34429	9.11327	7.24056	8.09994	8.84455	7.87077	10.0734	5.26608	7.61055	5.80709	6.35755	6.90605	9.12948	7.57229	8.69289	13.8402	8.68363	11.4155	4.78029	7.80173
Ctsb	8.5919	8.70004	7.10624	9.5544	22.1666	5.66634	5.38779	6.11768	4.51947	21.1363	9.41811	7.45003	9.16153	9.62922	7.06819	5.95143	5.89395	8.10564	6.2083	3.38956	6.82146	5.94024	6.55844	7.12172	7.44359	6.46079	4.8568	4.59562	6.6924	11.8443
Serpina1	6.09103	8.52103	5.4753	7.79559	4.86551	8.33592	5.77471	8.45297	11.1785	23.017	7.36049	6.68484	8.17302	21.9584	6.27575	5.22238	8.24954	8.21922	6.44723	8.24975	9.82745	9.6816	6.10171	4.79992	7.27258	10.3737	8.66209	5.62985	6.78715	3.07441
Igfbp2	6.41782	9.87258	4.66879	5.56958	11.4372	21.5605	6.30672	6.63663	7.03799	6.05366	4.1935	5.7868	7.69405	7.82572	8.21166	7.32026	6.17721	7.14535	7.64972	6.20512	6.96348	6.87792	8.68814	5.416	6.46029	12.8176	13.6697	12.8046	22.2606	11.7309
Tinagl1	4.67494	11.8686	5.14373	9.03683	12.7966	6.45821	7.24982	6.47695	6.71913	7.56941	6.52271	5.9409	8.62651	9.53957	8.37653	22.6749	10.1181	9.55123	10.5756	8.96202	11.418	7.17329	6.51739	10.4688	7.90436	9.66301	12.3812	12.0646	8.83277	21.3084
Igfbp3	10.4936	7.18291	10.0993	24.0097	8.63885	5.95084	8.44442	7.03583	7.81896	7.32614	8.19366	8.18335	8.27493	7.95228	8.65309	9.77026	7.43949	9.04011	8.71512	5.09482	9.13631	8.04065	8.68814	22.3904	4.4747	12.5662	8.39921	6.66841	10.9387	11.287
Mdh1	12.5179	9.05807	11.197	13.2415	27.0462	6.51511	6.94996	5.78834	5.30044	6.7975	6.32017	6.46166	7.66348	7.44076	6.62145	9.57684	8.99001	10.083	15.9692	7.34056	4.34566	5.9168	7.4873	6.90104	6.42229	6.0838	4.41292	8.00988	4.85781	11.8443
Fat1	9.88999	7.84526	5.47082	4.76346	6.87639	23.4999	7.17244	11.0128	6.29861	5.46888	6.69763	6.38195	7.11827	16.6059	6.15874	7.48392	6.61454	5.9992	4.67287	10.1561	7.46527	5.93555	5.72196	8.11941	9.33417	10.3433	13.6094	5.54763	6.02489	7.69311
LOC100359493 /// LOC100359496 /// LOC100361392 /// LOC100361596 /// LOC100361620 /// LOC100364435 /// LOC100909821 /// LOC100911590 /// Tmsb10	13.7616	8.71795	13.3208	8.16201	11.4325	5.84178	8.4686	7.28033	5.86884	7.33082	18.4173	9.05482	8.49912	8.2265	9.32321	11.273	10.8635	7.36735	10.4307	5.73586	9.00376	10.9334	7.17939	6.06887	7.48634	21.5143	12.0321	11.1948	8.61313	7.73089
Psmb7	7.49351	10.0963	7.06143	9.97121	10.3685	7.78114	8.05267	6.43204	5.65627	6.70861	19.0986	8.55532	7.46985	5.72691	7.20647	8.28241	6.86302	6.01469	9.56509	7.33218	8.83808	7.06077	8.56498	5.56313	8.20837	10.625	13.4068	13.8691	21.3993	13.5444
Shank3	7.21665	8.32859	5.2199	22.6722	8.14199	9.35539	9.88568	8.51285	5.94278	6.34839	7.27763	6.27567	7.80615	6.17515	6.24916	9.3735	7.83706	7.10405	4.47311	6.30567	8.62506	23.9063	5.60393	6.83667	6.29403	4.25519	7.14084	4.33165	5.38321	7.55143
Eci1	11.6374	7.70205	9.92006	10.6491	9.67007	7.18843	6.77585	6.63663	8.47516	7.53198	8.23049	10.3567	8.91185	9.71887	9.11047	9.67603	9.5466	8.17275	7.34028	5.70234	7.06762	5.71519	26.1876	6.79529	9.65244	12.6832	23.435	12.3372	9.22467	8.65652
Fabp3	6.89893	6.61902	6.76123	5.63371	6.45922	20.9915	4.41567	6.92605	7.37995	5.24432	6.20969	6.03123	6.12467	4.30309	6.88737	5.80264	21.26	6.73232	6.19655	5.63949	6.5185	6.7654	6.08632	6.92402	8.12762	6.66878	4.78785	6.73764	4.5262	5.82768
S100a6	12.999	9.89496	11.56	5.99555	9.18727	6.79013	7.33204	6.46198	9.08515	9.83368	8.13382	8.52343	7.83672	7.79408	8.3393	8.08899	8.77631	6.31414	4.8648	4.91047	7.22384	7.21549	7.4873	9.23663	18.1268	21.6789	9.56277	8.19595	6.66226	12.5149
Hsd17b10	11.3787	23.9878	8.88952	10.8415	9.16384	7.11256	6.26319	7.10569	14.441	6.41388	5.08652	7.90703	7.73991	6.63921	7.41921	7.65255	8.80613	7.46028	6.38456	5.54313	10.5801	8.833	7.72849	5.68726	5.10648	5.0135	4.39138	8.86669	4.54773	11.3059
Psme1	6.24989	5.59416	7.25858	7.50703	6.03266	5.76592	7.26917	5.62866	5.97051	6.6478	5.74017	5.84525	5.70175	7.89427	8.26484	9.5818	10.1976	6.31414	8.69162	20.1782	9.18838	8.59858	6.63029	9.69639	7.63834	6.17913	5.0378	7.5858	20.706	4.75093
Ankrd1	6.98971	4.98999	8.90744	8.86278	9.78726	6.38708	9.26662	7.87414	6.56201	7.13901	5.18318	8.71473	7.11318	3.29587	7.23307	8.1733	10.9431	12.1636	8.69162	20.2745	7.10549	16.3485	9.11921	10.1745	7.04932	10.118	7.10205	7.69398	4.95686	4.62814
Hnrnph1	12.4635	11.0943	7.31683	7.95131	24.7447	7.35439	6.35024	8.45796	8.58607	10.6945	6.96461	8.28962	23.1688	9.40247	4.97805	9.04121	7.74264	9.22081	8.44093	7.21487	7.1765	8.68297	9.92491	6.92862	8.81165	8.9827	8.6664	9.54175	8.96627	10.3755
Fdps	5.10612	6.7667	10.5832	5.96807	8.7326	7.11256	6.65494	7.72943	8.51675	10.2313	4.4835	9.58089	8.91185	8.14212	8.00424	9.29415	21.086	6.33995	6.55298	5.48447	8.05226	8.64546	6.36857	10.3585	7.90911	14.7328	10.2221	24.259	13.6647	9.19489
LOC100912469 /// Scd	8.24695	13.0411	10.0007	11.3636	10.6544	7.87124	5.973	6.27236	7.76351	7.61619	7.29144	9.11859	9.25324	7.11381	7.84468	23.409	7.97124	5.6946	7.85731	7.05146	6.61317	6.93418	8.09798	6.45047	5.81426	13.8402	10.2221	12.8046	24.7585	11.3059
LOC100359928 /// LOC100363716 /// Map1lc3b	12.1458	4.60064	4.59262	5.28561	4.89832	10.0666	9.15054	5.59872	7.42154	6.5823	4.14747	7.5882	6.18072	6.50737	6.51508	6.99293	6.28654	6.65488	12.9454	5.04454	25.0894	5.53234	10.2995	5.53554	8.14662	8.92637	4.6284	11.1818	6.71394	10.4417
Fh	9.6812	4.81993	10.4443	6.54518	6.21547	9.95759	5.00088	9.74038	11.6776	10.2033	17.4461	8.28962	7.42909	8.27396	6.64272	8.96682	6.45551	6.9027	5.6521	6.49422	6.66998	6.45128	6.18382	6.45507	5.77626	12.8306	7.45543	8.5205	24.7585	6.27633
Pcna	8.84153	12.8532	13.6748	11.5697	10.3685	9.20366	9.41171	6.52685	11.6268	11.0407	8.02795	8.8157	8.4125	4.86207	7.94042	8.82299	7.18604	8.9988	7.84556	7.41179	8.94222	9.30653	6.75858	6.85506	18.1601	14.0005	13.1784	22.0867	13.2169	11.3531
Hsd17b4	12.2592	10.4812	13.1147	9.38951	19.912	6.003	6.11326	6.37715	7.54169	7.3776	7.30065	7.51911	8.39722	6.77631	7.39262	6.60609	9.66587	9.69579	18.0804	5.27917	11.9956	7.56243	9.78122	10.9194	10.5027	10.3563	6.05053	11.316	4.54773	5.1618
Hmgb2 /// Hmgb2l1 /// LOC100911856 /// LOC100912122 /// RGD1559962 /// RGD1561694	12.4635	10.0247	13.1237	8.94981	10.5326	6.8897	8.13973	6.71148	7.172	7.28404	7.01065	9.28863	8.04054	6.9978	8.26484	7.41449	8.56759	8.34829	4.77079	8.89498	6.79779	6.76071	6.00421	9.301	24.2356	23.5899	5.52908	10.2341	7.67	11.3059
Sdha	8.29688	7.35744	23.6307	7.58031	9.13571	6.79013	6.36475	8.37313	2.97139	7.51327	8.70922	9.63403	8.60613	7.52514	5.65881	8.23777	6.72387	8.82327	6.97209	7.57938	6.61317	18.2052	8.32378	8.93319	6.42229	8.83971	11.3038	11.9477	8.61744	8.12759
Cd74	13.462	7.66624	12.0259	8.96355	9.32789	24.6521	12.9181	11.1775	8.10547	9.74948	8.33636	8.58189	8.55517	7.889	9.79655	11.0945	10.8486	11.033	9.15773	9.12542	8.67239	20.3384	8.33918	6.62978	9.12991	11.4743	10.0627	12.2593	12.7474	6.73442
Acox1 /// LOC100910385	25.9028	6.62797	13.1819	9.24753	5.76548	6.94186	7.24015	8.31325	9.45022	9.50153	9.05446	8.82101	7.49533	5.72691	8.14252	7.24587	6.79344	7.84749	7.51654	5.81547	6.70312	5.45733	7.70284	8.97457	21.4235	11.535	11.627	12.8478	8.56145	12.6282
Cd151 /// LOC100911730	8.36496	5.54046	10.6638	5.75737	6.84827	10.0097	8.24129	11.3721	6.38179	22.7457	7.24541	5.82399	6.06352	7.18237	6.06301	11.0399	6.45054	8.45154	9.29874	6.28054	6.57057	6.06682	6.27106	20.5422	5.98527	4.77084	7.66228	6.58619	9.78021	7.3578
Kpna2 /// LOC100359600	13.2124	9.58168	12.595	9.1834	9.96538	9.16572	10.0259	11.0128	8.29956	8.53313	8.05096	7.97611	4.86101	8.38997	7.57876	9.05609	9.14406	7.98173	6.38064	17.4883	6.73625	5.88866	7.9235	8.09642	8.8449	23.2562	11.4202	12.1641	6.92065	11.9387
LOC100912032 /// LOC679976 /// Rps27a	10.2259	5.19138	6.98974	9.4628	7.57013	6.1168	8.73944	8.95696	9.21917	5.94606	8.64477	9.14516	9.46215	8.24759	5.45671	9.96369	8.76141	24.8074	10.2701	8.39639	5.24509	5.85116	8.86776	8.56078	9.21542	14.6895	10.2221	11.8136	24.7585	10.1158
Pam	6.89893	8.74927	9.85285	25.2784	13.345	8.65836	10.5434	6.28733	10.6379	10.484	8.32716	10.6702	10.4761	10.0775	8.88178	9.8397	9.37267	8.19857	6.17696	5.99563	21.1603	8.00783	10.6741	8.95158	11.3625	11.3226	13.6827	4.72977	13.3934	11.8632
Scamp4	7.42089	8.30174	5.67245	11.7987	8.91541	11.4038	7.55452	25.4388	8.48903	10.4372	6.33398	6.10031	6.28263	6.23843	7.74895	7.62279	5.58583	8.41024	8.88746	6.98861	20.0525	7.253	8.19036	6.94701	7.36283	5.9018	4.77061	5.42214	4.22905	5.65295
Cd36 /// LOC100365047	10.6253	9.51903	13.6748	8.87653	7.33576	7.81908	7.5787	7.27534	6.12763	7.67233	7.99112	8.61908	8.21378	9.08606	8.62649	6.58625	6.05794	10.4702	9.56117	16.533	7.33745	7.09359	9.55028	7.28264	9.21067	11.2793	19.7763	12.2593	10.9215	6.70609
Ssr4	5.29221	5.41963	10.9282	9.42158	7.27951	19.6639	7.80601	6.1576	6.77458	8.37875	9.09128	8.86884	9.49782	5.36832	6.91396	8.61469	8.31414	6.56195	17.3676	6.12132	7.10076	8.75798	7.48217	6.80449	8.58364	6.61245	10.3428	9.0744	3.26868	9.28935
Sbp	4.91549	6.4579	8.42354	3.39397	5.31081	6.8897	5.8134	5.51888	6.45111	5.59519	5.01747	6.41915	15.5104	6.71831	7.04692	9.25943	5.74486	9.39634	8.46835	5.60598	8.98956	8.73454	8.07233	5.21371	16.3312	8.65338	5.15847	6.80688	11.042	6.15826
Qdpr	9.28179	6.07302	11.2105	6.56808	6.47328	7.27378	5.67314	7.23542	9.50105	5.67472	19.3794	6.49354	7.18451	5.69	7.84468	6.51682	3.9558	6.75814	8.81696	6.89644	18.4478	6.90605	10.397	7.88953	8.23687	5.64615	6.23584	4.561	6.69671	10.0402
Ifitm2	11.6283	11.5508	13.3925	11.3636	8.32011	9.9244	7.05153	11.9809	9.42712	11.3401	8.42843	10.3514	10.3335	9.74524	7.05224	11.1093	11.9916	10.6199	19.2673	8.3545	5.36817	7.60463	9.74529	6.44127	11.296	13.8229	24.4392	14.1677	9.75007	12.6282
Mapk14	9.44972	7.10683	3.09162	6.70549	7.5795	6.13103	6.1326	6.71647	21.1001	5.26303	6.63779	8.05581	7.09279	6.88706	9.07324	6.99293	5.83928	9.57704	5.86753	5.68977	6.58477	17.6801	9.11921	5.95393	7.82835	8.55372	7.30891	8.30414	7.7389	5.33653
Sh3gl1	11.5149	4.72595	8.32048	8.87195	8.78416	9.10882	7.56903	5.12967	7.41692	21.3422	5.6389	7.11526	6.94503	8.06302	6.4353	7.87077	5.41189	7.67712	9.00105	8.79862	6.21553	5.7105	7.03057	10.4044	18.5828	8.18973	7.75709	8.20461	7.26087	5.18069
Ramp2	13.5437	12.8532	11.8915	22.5257	9.90444	6.82806	6.67428	7.24041	7.27829	6.3016	8.96239	7.05149	9.44687	9.52375	8.61586	7.42441	8.63717	7.64098	9.64342	8.87822	20.4313	8.31258	7.62073	10.2803	5.15873	8.0164	5.18863	8.3777	9.97832	7.48531
Acadm	10.1033	9.24156	5.85615	10.0124	10.4201	5.8323	6.89192	9.07672	9.84302	10.1003	7.59065	8.94323	7.50552	7.16655	8.18506	8.60478	7.17113	7.27442	8.27251	6.26378	10.0357	5.96368	7.07676	9.73777	20.8249	10.0053	11.7606	21.1173	7.07569	7.4617
Crygd	7.74768	7.67072	5.90992	6.92992	5.28737	6.85651	5.60543	15.893	5.24961	6.77879	7.35128	5.82931	6.82783	7.07162	7.19052	10.1472	11.45	8.04884	5.40533	5.17442	6.16346	8.55638	5.81433	18.0871	8.96365	5.82381	4.95592	9.31673	6.17131	5.21375
Glrx	11.5603	6.52951	5.32296	7.59864	7.55138	7.88072	8.77814	7.38013	7.21359	8.98692	7.40192	8.06644	5.89028	7.9101	7.08415	9.19992	7.39477	7.18149	15.8282	3.72475	8.23215	22.556	6.34291	7.51712	5.57675	6.21379	10.1015	11.0953	10.465	7.49004
Fasn	5.71885	9.80545	10.4129	19.0813	8.14199	6.44872	6.06006	5.86319	5.82263	6.95656	4.67223	7.25874	5.84952	7.889	7.35539	7.2905	7.13138	6.89237	4.93138	7.48301	6.65578	20.1227	7.86192	5.88956	7.03982	5.0785	4.67149	8.0921	7.08	8.24565
Cd63	10.8386	5.98352	21.955	9.29791	6.02798	6.80435	7.54001	7.66955	6.46959	5.79635	4.64001	9.46399	7.77558	9.07552	21.178	8.9817	7.59355	9.8042	9.11856	5.73586	6.68892	8.42979	7.26663	9.14928	6.96856	9.40302	8.25699	13.2459	7.06708	12.751
Psme2	12.1458	6.27889	7.06143	6.50854	5.91548	7.72898	9.42622	8.12364	6.95019	6.91446	4.10143	8.27368	7.60743	7.51459	6.32361	18.4395	7.77246	7.07307	5.85969	8.06959	7.58361	6.26843	7.49243	8.92859	9.11566	10.7983	22.6119	13.8388	12.7345	8.12286
Timp1	9.59497	5.23614	13.3432	9.21088	20.4229	6.6052	6.26319	5.37916	7.01026	6.66183	8.05096	8.42779	8.26474	7.2351	4.78127	8.21793	9.34782	7.63582	8.49185	5.34202	6.38122	7.55306	7.01517	19.848	8.27962	13.0732	7.11498	9.122	11.6019	11.7545
Eif2s1	13.8206	5.33012	26.6775	5.35889	5.45612	6.50088	7.63674	7.445	7.3245	7.60216	5.10032	23.8805	4.647	8.02084	7.12138	5.63898	7.05683	7.08856	6.85459	6.5822	5.08888	5.48077	8.21602	6.57461	8.33663	8.73138	11.0108	8.50752	5.1162	5.52071
Eif2b2	22.7574	8.03322	8.32496	5.43676	5.97642	6.14051	5.88595	6.20251	5.66089	5.50162	6.58255	6.36601	8.5297	9.49211	7.67981	5.6241	5.26281	7.88363	16.0358	7.92294	5.92677	6.24499	6.72266	7.9401	6.27978	6.24413	4.63271	7.09248	6.51584	5.76629
Itfg1	8.65544	9.46533	24.8898	9.74677	9.5857	7.33068	6.09875	7.46995	7.07958	7.3776	9.44113	8.26837	7.3068	8.24759	8.8605	6.38291	7.30034	7.14019	16.2512	5.95792	9.47715	8.75329	7.33335	6.57001	8.34138	4.67984	10.5195	12.3069	10.2281	7.48531
LOC100359517 /// LOC100909755 /// LOC100911728 /// LOC100912121 /// Rps27	6.30436	12.8755	8.20847	13.2415	12.145	11.0387	11.3269	8.86215	6.9964	8.2805	6.2235	9.86253	8.62141	8.9595	8.91369	8.31216	6.5549	20.2176	6.67833	5.12415	7.39899	7.28113	9.00118	4.71257	9.05391	7.46609	20.9571	5.97171	9.61656	7.27752
Chkb	6.77185	5.07503	21.8519	4.48407	4.65926	11.8543	8.49762	18.378	9.24689	9.57638	5.38572	8.61908	5.96671	5.79019	8.92964	4.9992	5.49638	8.3741	4.87655	5.43	5.85103	5.37294	6.71753	6.05507	7.03032	4.57585	4.99471	7.58147	6.18854	8.85959
Alad	8.11079	7.07997	6.91805	6.64594	7.02639	10.0809	3.71438	7.37514	9.88923	11.0173	19.7292	8.06644	6.06862	8.11048	8.44567	7.90052	6.88787	8.66838	4.84913	6.82521	7.83924	5.60267	6.3583	8.10561	6.52204	10.235	14.6652	11.766	24.7585	9.87495
Sdc4	8.95954	10.3201	6.34006	17.9958	11.7747	6.81383	7.274	6.92106	5.50839	4.36013	6.45366	5.89839	5.95142	7.70443	8.62649	8.24273	6.63939	7.37768	5.08023	16.533	5.34451	6.59662	7.97995	7.53551	6.6503	4.80551	8.91204	5.83323	6.36511	7.13112
Dpp7	8.37404	8.32859	6.44759	9.1376	7.27482	10.2326	9.98241	7.41506	7.00564	6.66183	7.5216	9.04951	8.17811	9.54485	8.49353	10.7126	9.28818	9.19499	7.75939	6.26797	24.5544	11.6132	8.15957	9.88949	9.05866	12.6746	23.4221	10.7404	9.3754	11.8537
Sh2b3	11.6283	11.0048	11.905	9.99411	11.095	8.9476	7.29335	7.33522	11.3125	9.48282	7.82541	7.94954	8.38193	7.28783	8.74882	6.49202	7.87682	8.30182	3.40771	5.43419	25.1083	5.97306	8.60603	7.84815	9.9327	18.7194	8.10185	6.59917	8.23416	9.10516
Tsn	9.75382	11.3718	10.4443	7.89177	9.24821	6.61468	6.75167	5.38415	4.23296	6.83025	7.96811	9.278	7.84691	22.2959	8.74882	9.45285	7.5041	9.10722	6.40806	6.35595	6.58477	6.61537	24.6891	7.51712	4.26094	9.44202	5.33516	8.34308	7.50204	5.37431
Oat	12.1004	9.55483	25.8128	8.79408	8.62479	6.70478	8.5218	8.51784	8.18865	6.72265	4.72286	9.72437	9.58444	9.18626	7.3873	6.80447	8.87074	8.34829	6.65091	18.7955	7.55521	7.14516	9.55542	5.26428	8.20362	8.44972	5.48168	4.35762	10.2324	5.10985
Gnb1	8.45119	6.65034	21.8654	9.74677	5.57799	9.47393	6.20999	6.53683	9.39477	11.1576	8.9716	8.85289	8.65199	9.62922	6.61081	8.02451	8.17996	8.35861	6.15346	18.8248	5.567	6.85448	8.68301	8.87342	8.17987	14.0049	10.3126	6.40877	12.3469	11.8537
Car2	11.2562	10.1545	12.6129	6.36655	9.4357	5.72324	4.22705	6.57675	9.42712	8.24308	7.19477	6.71672	9.09019	7.60951	6.00983	8.37168	22.2638	5.87013	6.66266	16.3403	5.75162	5.19009	10.0173	7.30103	10.5217	4.80984	5.93418	5.67745	4.59511	10.1205
Akr1b1	7.47536	8.23013	7.14208	5.29935	8.69979	6.09784	6.81454	6.1576	6.97329	6.80686	8.49747	8.90072	7.15394	8.8804	8.08401	11.0151	9.91435	8.23987	7.41862	6.52774	6.87354	6.57786	7.05623	21.31	7.72385	12.8176	9.4852	12.4324	20.8567	10.98
Cox8b	12.3137	5.03475	12.4158	5.63371	5.28737	20.8256	4.26574	6.63663	6.46497	5.77296	5.37652	5.93558	6.64949	8.13685	6.95651	6.71024	20.6338	6.944	7.24236	7.54167	7.08656	5.8746	5.43458	5.05739	6.17053	4.46752	5.88677	8.45559	6.757	8.63763
Ckb	5.4556	4.49771	8.06509	9.73761	10.2607	6.73797	5.27655	7.67454	9.28848	6.88639	6.09922	8.29494	7.48004	9.62922	6.74909	9.30407	22.3483	8.4154	5.2369	5.99144	9.14578	10.6005	8.88828	7.73321	8.04211	5.15216	11.4934	9.30375	8.83277	18.4276
Cpt1b	9.93537	5.99247	11.5017	8.13911	7.61231	21.4562	5.05408	7.1506	15.5132	6.4092	6.70684	7.46598	8.16283	5.87456	8.5414	5.50507	6.14243	5.85464	6.71749	6.45232	6.13979	5.79021	7.33335	6.45047	6.91156	4.60618	6.30048	4.11961	7.80781	5.94575
Pfkl	4.89734	8.48523	5.04964	17.2813	8.95759	8.45447	9.83732	9.59567	4.91227	9.43135	7.93588	8.62971	8.12716	5.71636	6.59485	6.93342	5.49141	6.68586	16.3022	6.01658	5.69954	6.31062	5.98368	5.15394	6.18003	5.32549	4.7663	5.28366	5.51671	5.58683
Maged2	7.33466	22.4885	7.51845	7.42459	10.2091	5.38184	5.81824	6.54182	6.33096	4.45837	8.06477	8.33214	3.99989	7.5726	8.14784	6.29364	6.40085	7.19182	5.91845	7.54586	6.25814	7.56243	5.76301	7.09873	6.33204	10.6206	4.68011	6.46935	12.812	8.97293
Dgkz	5.04258	22.0902	4.84801	6.88412	8.64354	4.86499	8.8797	11.6316	8.98349	5.88992	8.65398	7.12589	5.91576	8.14212	6.28638	6.8491	8.1253	6.51549	7.86123	6.10875	9.0511	19.0444	5.77328	8.20676	5.57675	5.06983	5.05504	5.70341	6.73978	6.12993
Flot2	4.86556	21.6159	8.92536	6.33449	10.0966	7.52509	7.12407	8.47792	8.97887	8.51442	8.12001	6.40852	6.48135	7.2351	6.27043	5.6489	6.60957	3.03574	8.15892	6.2135	6.10192	15.9313	9.81714	8.92859	9.9897	10.2393	10.9289	5.53465	13.2169	5.12402
Arf5	12.8402	5.62549	11.1209	6.6093	6.27172	9.16098	11.709	8.87712	16.7424	10.6617	6.89557	7.48723	9.02905	6.67085	7.39794	6.39283	8.35887	4.66203	14.4103	5.58084	6.38595	6.70914	8.40076	5.44359	8.10862	11.223	12.2217	3.36666	10.4133	8.73208
Lum	12.7812	9.04464	11.6944	10.7224	5.60142	11.8969	10.9981	10.0348	8.7894	6.6899	7.60446	7.95485	8.79466	8.21595	7.66386	9.16024	9.27327	6.57228	16.1455	8.70644	8.35996	4.34148	7.0511	9.17226	8.42688	14.0742	12.963	9.32971	6.66226	24.2694
Prpsap1	5.40114	7.74232	4.56126	6.36197	8.15605	13.291	9.27629	25.4388	8.48903	10.9799	6.56874	7.30125	6.39982	6.34917	9.77528	8.16338	7.80227	10.4186	6.64307	5.76938	8.73867	8.44386	6.48147	7.58149	6.05177	4.61051	6.69696	12.2939	6.60627	24.3969
Bcar1	11.2925	4.3724	13.3208	5.52836	4.87957	11.3516	8.66206	9.20146	17.7359	8.79979	5.68493	7.81138	6.02786	4.35583	7.19052	10.5787	11.1021	9.89714	4.78646	6.41461	5.48652	15.2046	7.00491	5.79761	6.31778	5.61581	5.69284	10.1043	9.90941	7.065
Sec31a	4.82018	6.18491	5.38569	5.72531	23.3057	11.7215	7.85921	11.4968	11.2941	10.3389	5.73556	6.2119	7.58195	8.90677	7.13202	8.20305	7.97621	7.2073	5.90669	5.27498	18.4099	8.05941	7.17426	8.10102	4.76922	5.89747	4.23193	7.66369	4.36686	5.64822
Cdo1	5.55546	7.41562	5.79342	6.21998	6.54828	22.9119	10.3983	6.43703	11.4003	8.19162	7.3743	5.60612	7.28132	6.67085	5.69604	5.79273	6.4406	6.48451	7.19927	6.67857	7.8345	8.55638	4.00281	6.11944	6.97806	5.46415	8.3949	5.33559	7.54941	16.2599
Gfm1	6.53583	7.83183	9.14043	4.63979	2.80306	6.07413	10.8868	9.17651	9.38553	20.7293	5.42715	7.04618	7.37814	7.63588	8.22229	7.25579	6.53006	6.65488	5.6521	6.97605	7.98599	6.36688	19.701	8.45044	8.19887	10.2697	4.68011	6.49531	8.82416	7.69783
Afp	5.26951	22.1395	7.33923	6.29326	9.23415	6.27802	6.88225	6.74641	8.30418	8.6033	7.43414	8.06113	8.78447	7.4144	8.3393	6.37299	7.43949	8.07466	8.42135	7.55005	6.33861	24.3798	9.99675	7.1677	10.859	9.44202	11.1918	10.8573	10.5985	12.1937
Acat1	13.4575	5.80003	13.3432	5.00163	6.45453	9.65886	6.65978	8.80726	7.20435	9.96935	5.33048	8.83695	9.19719	8.41107	8.59458	8.18818	7.41961	7.69777	7.16794	17.5763	9.11264	7.59525	7.46164	6.25737	8.10862	12.7006	10.4333	11.6535	20.8567	9.44519
Tcn2	6.53583	19.3737	7.60359	8.03376	7.72481	7.53457	6.96447	7.82424	7.56942	6.325	8.15684	7.68916	9.11057	9.17571	8.69032	9.02634	9.21364	8.96783	8.90313	9.81255	7.87238	10.9193	7.77981	22.3445	7.19657	12.5403	12.351	12.9733	6.15839	7.24918
Nme2	4.99719	8.14958	8.0382	10.7086	9.22477	7.72898	6.26319	7.28532	4.47788	6.66651	7.46636	7.41284	6.36925	8.43216	7.99892	7.1318	7.44943	8.79745	19.2673	5.51799	6.97768	6.47003	6.27619	5.48037	6.94956	11.431	13.6827	23.2897	8.74233	13.2374
Polr2g	10.1895	5.82241	11.2911	5.21691	24.1728	5.82282	8.74912	6.31228	7.30602	7.85011	7.5262	6.69015	6.06862	7.22455	7.29157	8.13362	7.54882	7.3467	3.45079	8.71063	10.476	10.4833	6.93307	7.88493	6.03752	20.8816	12.9156	11.4717	7.43744	4.50536
Degs1	10.2667	5.62549	25.8128	6.36655	4.62645	6.81383	5.82791	5.79333	7.09344	5.48291	5.52842	7.7423	8.64689	8.66419	8.05742	8.03939	6.15237	6.23669	4.2851	7.36151	5.38238	4.49151	7.37953	7.82056	19.6374	8.65338	5.48168	8.47723	5.19372	8.14175
Tsc22d3	9.05939	6.01037	6.95838	6.82915	5.23581	8.72948	16.352	6.61667	7.00564	6.72265	5.36731	6.1322	5.77309	8.11576	8.43503	11.0647	9.46709	8.35345	4.64937	17.5972	8.44044	9.63472	7.80547	9.83432	8.54564	5.68081	6.11087	4.59562	9.28926	7.69783
Slc25a1	9.93537	6.53846	9.10907	6.82457	6.17797	11.8969	7.81085	9.74038	12.9392	23.2462	6.67922	7.34907	7.72462	8.24759	7.34475	9.3983	8.09548	7.14535	6.48248	7.8182	6.37175	3.88202	6.95359	7.49873	6.78331	20.7906	12.8423	11.0953	9.32802	5.686
Gsta1	7.0124	8.44047	5.13029	10.5712	9.36071	4.09209	5.5087	5.92806	4.90302	7.5507	8.967	8.23649	9.09529	7.99974	8.67968	22.9626	9.09437	7.35703	5.09198	9.36424	5.60013	4.67436	6.46094	8.17918	9.34842	10.235	24.7796	11.4717	12.1876	8.11814
Cdk1	12.9854	5.57626	14.0557	9.39409	9.5857	13.291	11.5543	11.901	9.47795	9.90386	7.71493	7.82732	9.0749	8.30033	8.04679	8.41135	8.67195	5.3332	6.18871	8.24556	19.8017	7.90469	7.6977	8.38607	8.56464	21.5316	11.1918	10.3293	11.0291	13.0674
Decr1	8.60551	8.24804	5.87855	6.85205	7.27013	7.60096	6.1713	9.7304	5.97975	7.08287	7.49858	7.62539	9.22777	5.71636	6.56294	8.54526	7.43949	8.1108	7.0661	6.22188	9.73277	21.7215	5.77328	9.71938	8.12762	9.31202	10.485	24.3758	6.92927	13.5444
Furin	8.15617	5.80003	7.56326	22.6722	5.65299	7.17895	10.7369	9.62062	11.1323	11.3541	8.387	9.53838	9.29401	9.81906	9.29662	10.4398	11.6388	9.19499	5.84402	5.86155	10.3576	8.51418	8.60603	7.31023	8.24162	7.40109	19.9142	10.6106	11.0205	6.00242
Bin1	7.18942	17.9461	4.14904	6.59098	7.32169	6.93238	6.3841	3.0289	9.88923	8.34132	5.55604	8.56063	6.54249	7.22983	8.61054	9.05609	10.4262	6.69618	8.08058	5.81966	16.8619	6.32938	6.33264	6.76771	7.39133	5.9538	4.1285	6.37415	6.21007	9.94106
Pttg1	11.2925	18.2012	5.30056	9.38493	8.99509	5.81333	7.2208	7.24041	7.7404	8.24776	7.58604	9.61809	8.72842	7.10854	7.97233	9.12553	9.19873	8.09015	8.27642	18.1377	7.45106	10.0473	8.10312	9.54927	4.77397	10.092	8.67071	8.36039	10.5985	11.3578
Cox6a2	5.69616	4.76175	6.08018	5.36805	5.27799	21.2618	4.29959	19.0416	7.13965	7.10626	5.89668	6.823	5.7527	6.57065	6.22788	5.63402	3.23521	6.4019	5.86361	6.55706	7.89131	5.4292	6.79964	6.25737	5.72876	5.85847	6.75729	4.58264	4.66832	8.67541
Gabarapl2 /// LOC100359937 /// LOC501441	7.57067	25.6078	9.25245	13.2415	9.16384	7.29749	8.29933	8.96694	7.0842	7.86414	6.73445	8.61908	8.03035	5.83765	8.47226	7.90548	8.41353	6.52065	6.84675	5.93278	6.10192	24.7502	6.38396	5.45278	6.17053	5.0135	4.46464	10.3986	4.69846	12.0237
Psmb8	11.946	8.26146	5.9144	12.0781	8.49354	9.32694	8.05751	6.34721	7.19049	6.1519	8.57112	9.03357	9.01885	9.69778	7.87128	8.53038	8.66698	7.89912	7.98265	20.2745	7.4416	8.31258	7.826	5.6137	9.78069	11.4266	17.2035	11.3895	9.67686	7.48059
Ica1	6.02295	11.0943	9.86181	6.9574	11.0857	7.88072	7.76248	7.82923	5.74869	7.27936	8.13382	9.20892	7.59214	9.65559	7.62131	20.5622	7.0618	8.10047	6.2083	8.50114	8.35996	8.7908	8.06719	4.71716	9.11566	9.37702	10.722	23.4671	10.3874	11.9387
LOC100909429 /// Phkg2	4.57054	4.79308	7.02111	7.84139	6.92327	24.3013	6.73716	5.23945	8.19789	11.4103	9.19716	8.61908	6.81764	6.80796	8.79137	7.46904	15.3859	6.00953	7.2972	7.34056	6.36701	5.39169	5.88618	6.03209	6.21328	8.63605	6.11948	6.10585	7.54941	5.9363
Slc27a1	10.0579	7.46038	7.31683	21.6096	7.31701	7.01299	6.74683	7.42005	7.54169	7.18112	8.387	5.32449	8.38193	7.21928	8.50417	8.23281	7.87682	6.07665	5.06064	4.95236	8.51618	9.82225	7.74389	7.03897	6.88781	4.83151	9.70068	10.7274	13.9748	5.07679
Bpifa2	9.99892	5.28984	5.94576	7.0261	24.3556	5.93188	9.0925	7.2953	7.00102	6.07705	6.98303	6.30224	5.67627	7.99447	7.3288	5.34141	9.73048	8.12629	5.67951	13.9018	6.86407	7.01858	6.5841	6.7815	6.5458	7.80841	2.68482	5.66014	6.36511	9.00127
A2m /// LOC100911545	7.43905	10.3246	12.6129	9.4857	10.6544	9.55454	10.6547	7.73442	9.51954	7.24661	20.1389	7.50317	9.09019	7.68861	8.04147	8.26257	7.95633	7.39833	6.40806	6.33919	6.58004	8.75798	7.66178	7.26425	5.16823	10.1093	9.99803	7.70264	19.0221	7.29641
Ifrd1	8.1244	8.28831	13.3656	4.93751	5.02019	6.01249	3.54511	5.49892	7.07034	7.98578	7.67811	10.1388	6.78197	6.06441	9.64231	5.63402	21.6675	7.32089	8.27642	6.41461	8.13747	9.65347	7.43598	7.05736	8.78315	13.8229	20.302	11.8655	10.9904	11.7876
Mgat1	5.21959	11.4568	18.4959	8.78034	5.81236	6.70003	7.91725	5.8582	6.92708	5.74957	4.29477	7.67853	7.63291	7.88373	6.60549	8.88251	8.75147	6.45353	8.99322	6.34757	6.40962	18.1677	6.51226	5.09877	5.90927	8.04673	5.19725	4.84228	6.15408	7.64116
Men1	6.81724	8.93276	5.99505	4.94667	5.22643	6.62891	6.82421	7.445	7.11193	6.0443	7.19477	7.81669	9.70164	5.93257	6.72781	5.19262	8.57753	6.74265	4.64153	4.81829	6.77886	6.85448	6.25567	5.24129	21.8557	5.13483	5.52908	5.49137	13.6346	6.74859
Ahcy	13.7616	7.70652	9.90662	5.26729	5.31081	23.4999	6.50501	9.57571	7.01488	6.11915	7.70112	7.35439	8.60613	8.69583	7.33412	6.95821	8.13524	7.14535	8.95013	5.61017	7.38006	6.14184	7.64639	7.84815	6.75955	11.6866	10.9892	20.9702	5.76649	12.5196
Eef1a2	4.80202	5.3704	4.51645	5.87188	5.58736	5.30597	22.8957	6.01788	5.63316	5.99752	6.28334	7.48192	7.06222	6.79213	6.92991	5.6241	5.93867	5.57585	4.56711	15.2593	6.52323	6.01525	5.15746	5.30566	5.77626	4.31152	6.1712	4.29271	6.58474	5.06262
Ece1	5.46014	8.13168	5.15718	22.6997	8.97165	9.9244	10.6353	11.5567	11.2525	8.70155	4.80112	5.97278	7.33228	6.5021	8.20634	6.54657	5.55104	8.68903	7.67714	5.39648	4.60129	22.2325	7.32821	7.49873	5.09223	5.85414	5.93418	6.3828	6.11102	8.17954
Sgk1	8.10625	9.38029	9.84389	6.99404	8.84978	5.04518	6.88709	6.63663	5.9474	5.85249	19.6464	6.88677	4.8661	6.99252	6.15874	6.52178	6.1474	6.95949	6.87025	5.98725	7.36112	8.15317	8.07746	4.58383	4.3607	12.8436	5.14123	4.73842	5.86554	5.29875
Apcs	10.9248	5.80003	11.1209	5.28103	6.10297	6.93238	7.37073	7.15559	6.52504	6.63376	7.89906	10.4152	21.9968	10.0089	9.3498	5.73817	8.24457	7.58935	5.09981	6.61572	6.25814	7.18736	9.08842	6.09185	5.77626	13.6495	8.98099	4.11096	24.7585	7.4617
Timm8b	6.82631	5.50466	4.94659	5.73905	6.56234	12.1814	6.63076	8.91205	10.758	6.12851	17.5335	5.20227	7.13356	6.48628	7.33412	10.41	5.18329	10.1501	10.3367	5.72748	7.52681	9.95353	5.54235	21.1859	4.93072	5.57681	5.98158	5.68178	8.51408	7.07445
Phgdh	10.4573	7.26346	11.6944	10.3468	9.71226	8.53507	8.90388	7.21546	5.43446	7.08287	7.05207	8.69348	7.47495	7.97865	8.28611	9.6562	9.32794	20.7959	5.44842	7.47044	6.47589	3.27721	5.76301	7.07115	6.47454	10.5426	8.96806	23.2897	12.0627	8.39677
Sptbn2	4.24375	7.74232	7.26306	10.104	27.0462	5.74221	6.59207	5.97796	6.3402	5.19754	5.73096	7.04618	6.9705	6.65503	6.5204	6.19941	8.39862	5.15766	7.20319	5.41743	5.23563	17.2862	5.48077	6.12404	6.38904	2.76457	4.3095	4.77304	5.41335	5.78518
Ppp1r14a	4.29368	10.6781	4.84801	4.64895	9.79195	7.2643	7.24982	5.78834	7.5001	7.95771	5.33048	20.8622	8.0813	8.00502	8.00956	8.08899	6.376	5.79269	5.04889	7.31961	7.66409	5.87929	9.3912	6.24817	2.85963	7.9254	7.97257	6.81554	21.7008	11.6318
Hopx	12.704	5.45543	9.66018	9.8338	7.43888	11.5318	6.19548	11.2324	9.36242	9.36586	8.46065	7.97079	5.91576	6.12241	8.06274	7.15163	19.9082	8.68387	7.95915	6.44394	10.173	10.4083	9.98136	4.79073	10.498	12.8176	10.2221	14.1677	23.7033	12.751
Timp2	3.1136	6.22071	8.50867	7.15435	7.75762	6.42501	16.6083	7.87414	6.22929	6.98931	8.14763	6.65827	7.84182	22.7758	4.72808	9.14536	7.48422	10.2276	9.45149	5.40067	5.72795	8.40166	8.04667	9.301	7.65735	5.68948	6.79608	8.36472	5.56839	7.29641
LOC100364487 /// LOC100912604 /// Srm	9.14109	5.70157	6.96734	5.61539	9.23415	6.70952	7.74797	3.88717	6.02134	7.64426	9.25239	4.31486	9.53858	9.39719	6.5204	9.45285	6.46048	9.39634	17.109	10.5541	8.64873	8.35947	6.11198	10.832	6.45079	11.6866	9.05856	13.908	5.06883	9.37907
Psma4	26.0616	7.56331	8.01132	6.307	7.40138	6.48192	7.20146	9.431	7.62025	6.70861	8.26271	4.73465	7.67367	8.31087	7.72768	7.72198	7.16119	5.64297	5.58943	5.59341	8.44517	6.7232	6.9228	17.2825	8.8164	4.93984	13.2819	10.8702	12.7345	8.02369
Cth	6.63569	7.50066	6.60889	8.26735	4.903	7.3212	6.8097	6.70649	6.95019	5.82442	8.74144	5.60612	5.46736	5.19957	8.17975	7.44921	6.57478	7.19698	5.96937	17.5763	6.59897	4.77282	10.2636	5.24129	8.37463	12.7006	7.29167	5.93709	24.7585	7.2728
Fdft1	9.85821	6.40867	9.87077	7.91467	9.5107	11.6267	11.0803	9.26633	11.0399	7.0127	18.1365	8.2046	7.58195	8.33197	8.1957	4.70659	9.02479	5.89078	5.87928	5.02359	9.51502	7.94688	6.18382	8.07803	8.44588	9.03037	22.6938	8.72389	10.7363	13.2374
Hgs	8.32865	6.8204	10.9864	5.49172	7.62169	6.08361	8.40089	6.94102	6.32171	8.6267	5.42255	6.96647	8.05073	6.72358	6.32361	6.00103	7.72773	7.17116	13.3723	4.70097	20.2466	6.31062	6.55331	6.51024	6.44129	4.70151	7.33045	7.67235	5.6373	5.82296
Prl8a9	14.4968	5.27642	7.19137	7.03984	19.5183	6.82332	6.02137	6.63164	6.65906	6.2174	7.57684	7.8592	7.77048	8.52708	3.30275	5.80264	7.76749	6.67553	7.96699	8.04026	6.54217	6.58724	5.6963	8.3217	3.3109	5.21283	4.58961	7.93631	5.97751	7.13584
Akr7a2	26.0072	4.32765	9.65122	7.81849	6.96545	8.78639	10.5579	11.8112	22.9208	7.18112	7.12112	10.0432	8.95261	9.09661	8.22229	9.01146	7.41464	9.31374	4.6572	6.26797	9.47715	10.7646	10.4894	8.95158	10.004	10.56	12.5967	12.8046	5.9043	12.1937
Gnai2	4.98811	8.27936	5.2199	8.43682	23.3057	8.90019	9.36818	6.55679	8.21638	8.7109	5.68033	7.49786	7.0877	6.67085	6.91396	7.2905	5.84425	8.13661	6.47856	5.91602	6.62738	21.7215	4.45954	7.82056	5.84276	7.84741	4.28364	5.66447	5.3789	5.82296
Nupr1	8.0654	11.1212	25.9875	5.43676	10.7435	9.46445	5.70216	8.86215	6.10914	9.03838	9.86462	8.05581	4.60624	8.3056	6.28107	7.38969	11.1021	7.65647	5.53851	9.2595	23.7402	10.0379	5.54235	7.3654	9.00641	9.35536	9.19646	6.55157	4.77168	8.69902
Slc12a2	5.24228	6.07302	8.26224	11.0247	10.0216	9.25107	5.79405	9.89507	9.22379	5.90395	8.57573	6.58388	9.86979	10.0933	9.10515	7.04253	20.3356	8.30182	4.90788	8.5598	7.66409	9.49875	7.93377	7.7424	6.7453	10.5903	9.4852	6.34386	23.1822	11.8537
Scarb1	12.7358	25.6078	14.0109	12.9575	9.21071	6.70952	6.7952	6.23245	6.9964	5.42677	5.54683	8.7413	5.77818	8.34251	6.67463	8.10386	7.90663	6.76846	15.9966	7.4076	5.40131	8.50012	7.52322	9.81133	6.6028	5.66781	6.02899	10.4591	4.7243	8.18898
G6pd	7.08049	5.51808	7.36163	4.88255	6.00454	5.93188	7.95594	6.06778	6.93632	3.05958	6.78049	7.50849	7.7552	8.40579	6.71718	24.8026	6.12255	6.41739	9.70218	13.9018	7.19544	10.0285	7.95943	10.2297	8.40788	10.6163	7.9424	14.1677	11.533	10.3944
Fads1	8.57828	6.60111	4.65983	5.70699	8.0998	6.82806	7.49164	5.58874	15.7303	5.42209	19.7062	6.90271	8.54498	5.99585	8.15847	6.12501	4.60185	7.63066	6.15346	5.97049	7.41793	4.62748	8.30326	5.73784	6.11828	6.96777	5.16709	9.34702	7.42452	4.60453
Tgfb3	6.48591	19.3379	8.04717	5.25355	6.59984	6.02197	6.16162	6.99092	6.6036	6.30628	8.33176	7.63602	5.40112	9.08606	10.0199	9.21976	5.48147	8.02303	4.50444	8.69806	9.42981	6.90605	6.27106	8.23435	17.8988	7.1151	9.50244	9.10469	11.154	6.70609
Mmp14	5.51915	22.1395	10.4488	10.3697	6.84358	5.86075	6.25351	8.94698	8.7894	10.367	8.3916	8.72536	19.388	8.84876	5.85559	7.76662	9.15897	9.57704	8.25292	8.145	10.2488	6.89668	8.22115	9.75156	7.7001	4.88784	10.4247	7.60744	8.31598	7.49948
Evl	7.3982	6.61902	8.58036	9.28417	8.93415	6.46295	6.69363	16.1624	7.18124	6.03962	8.22128	6.63701	8.06601	8.76439	8.73286	19.6298	8.47814	8.56513	8.15892	8.11987	8.31262	8.45792	8.36997	7.71022	4.71221	9.00003	7.65797	5.78131	9.26343	5.2468
Pfkm	8.25603	10.4409	12.4606	6.65052	8.49823	4.57101	21.8752	7.70448	5.5962	6.5168	6.91398	6.99836	6.26734	21.6209	6.66931	6.69536	3.79181	6.09213	4.73946	7.63804	5.3303	6.41377	6.60463	7.59068	7.31058	6.50845	7.05034	7.86708	9.60795	8.11814
LOC678813 /// Marf1	9.87183	9.61301	7.00319	9.33455	9.32789	16.6624	6.06489	7.37514	5.51764	7.61619	7.05668	22.7752	6.18581	6.64975	6.33957	9.09081	4.99445	6.56195	5.58551	5.5976	10.76	9.60659	6.79964	9.91248	5.93777	10.1613	3.30538	9.10469	4.62525	5.71434
Fbln5	6.11373	10.3738	9.9559	9.30707	9.63257	8.18893	6.97898	9.32122	7.19049	6.90042	8.59414	8.28962	8.26983	8.49544	8.0521	9.93393	10.5952	8.64773	5.76569	8.25813	9.19785	9.8035	8.94473	21.1859	8.13712	5.39482	6.89519	10.589	9.00503	23.5421
Adrm1	8.35134	6.7667	9.66915	5.72531	22.9822	9.23685	9.36818	8.54279	11.1323	10.2313	5.40874	5.26072	6.41511	6.74995	7.5894	8.01459	20.599	9.1382	10.0116	5.41324	6.68418	11.5476	7.37953	10.3217	7.40558	4.9615	4.92144	5.44377	5.14635	5.46877
Oxr1	10.7115	12.5712	8.80887	10.0033	24.3885	6.74271	6.66945	10.6535	8.2857	8.82786	7.93128	10.0485	8.58575	9.95617	8.42439	11.2532	6.6692	8.57029	17.7945	8.145	9.49608	7.68902	6.21974	9.08031	8.30812	8.51472	11.4633	5.73803	6.89912	6.35189
Glrx3	5.08796	12.0521	9.40927	10.8369	10.3685	6.65736	6.68879	6.29232	6.97791	18.6148	6.59636	7.78481	7.06222	4.70914	8.54672	6.59121	6.76363	7.42414	10.137	7.65899	11.418	9.46593	7.92864	9.58145	6.28928	10.235	13.4068	14.2932	23.712	7.64116
Cyp2e1	6.43598	10.4678	4.77632	11.5697	11.5403	8.71526	5.17499	7.57474	9.32545	20.4814	8.44684	7.64665	9.27362	7.80463	6.90332	8.07411	9.91435	8.60643	6.59215	14.8278	8.80494	8.90332	8.35457	6.28036	7.39608	9.82334	7.1236	5.78131	4.76737	2.90912
Atp6ap1	20.193	6.47133	9.94694	5.64287	6.10297	8.10358	8.12522	7.06078	5.40211	6.95188	9.44573	9.42148	9.49273	8.83294	7.19052	10.3406	11.5046	11.1569	17.7279	6.96348	5.60487	7.0092	6.84069	11.1538	10.3032	7.0891	7.41664	8.71523	9.93956	12.3685
Gak	13.2623	9.11177	10.6997	6.08715	7.94043	5.36287	6.85807	6.87116	6.56201	7.19047	6.76668	5.85056	3.92346	5.69	8.12656	7.63271	6.75369	7.166	5.04498	15.9171	5.71374	7.0092	7.70284	8.11021	7.79035	10.3867	5.73163	4.73409	20.0557	7.63644
Slc11a2	8.00186	6.33259	9.39135	6.52686	6.55765	9.06615	5.77471	7.75937	19.2609	8.66412	8.96239	9.75094	20.937	8.1474	7.85532	9.40326	7.74761	8.2915	6.77625	4.70935	5.32084	6.56849	6.47634	9.02514	9.60968	5.14783	8.86032	10.7664	10.7363	10.078
Stx5	9.99438	6.08198	8.52659	7.10397	5.49361	7.46819	8.55566	4.42109	6.06293	5.6794	7.70112	5.56893	7.87749	6.9767	22.3374	8.50063	5.33735	7.64098	15.3621	4.94398	7.47473	11.4351	5.89131	9.79294	5.11598	5.53348	4.55083	5.41348	5.14635	8.54317
Lamb2	6.70831	5.82241	5.06756	19.2325	6.70765	5.91765	6.81938	7.06577	7.19511	7.64426	8.33176	9.99537	8.07621	7.3142	8.0521	20.835	6.67417	6.64972	4.80604	6.49003	8.41203	8.27039	6.11711	6.17001	5.51025	5.92347	5.77042	4.99806	3.76394	5.7049
Rab14	8.31049	6.41315	5.20198	5.94058	7.542	7.31646	7.24498	8.66255	8.08699	7.27936	20.0192	4.1023	5.7629	8.38997	8.2808	5.36125	5.30256	5.59134	7.00735	7.58357	21.1224	7.58119	10.9923	5.02061	7.30108	5.52048	11.3038	6.3352	5.36168	11.0036
Lcat	5.35575	5.82241	5.68141	7.75436	10.0029	13.291	9.63902	11.3222	23.2258	8.10741	5.58366	9.79876	8.86599	8.71165	6.45126	5.8572	7.6184	7.36219	5.36224	4.70516	8.28895	23.9438	9.36041	8.40906	8.64064	5.49015	8.59314	5.65581	8.31598	5.78518
Cdhr1	8.79614	8.54788	6.86429	5.28561	7.57013	21.8593	4.95251	5.81828	7.12117	6.96124	7.59985	9.60215	7.11827	8.36888	9.637	7.02765	9.68078	10.5063	2.80842	6.02496	5.9599	6.18404	19.5778	5.51255	5.4485	10.417	12.769	12.9474	6.61489	7.15945
Camk1	5.23774	8.29726	6.75675	8.47346	17.9105	9.35539	6.56788	6.04283	9.14985	5.40338	8.2535	9.53838	6.18072	8.75384	6.25979	7.46409	5.82934	9.73193	3.57222	6.93415	9.3588	9.54095	8.55472	7.06655	7.34383	4.80984	4.98178	13.0296	6.02489	4.99651
Casp2	25.3717	6.26994	14.0109	6.34823	8.99978	6.52933	6.91611	6.80629	6.34482	7.15772	7.78858	9.35771	7.37304	8.00502	8.00424	5.42076	7.33513	6.20572	16.6155	9.06257	7.2049	6.90136	7.80034	7.79298	6.97806	13.8402	10.9892	12.2636	12.0541	12.0237
Pdk2	24.3324	6.89201	4.93315	7.7223	5.50299	5.05466	6.50017	9.52082	6.0121	7.20919	8.29033	6.79112	21.5484	6.56011	6.26511	5.6489	7.55379	7.20214	6.19655	7.86429	9.54815	8.84706	6.53792	6.50104	5.73351	12.8219	9.36454	9.00516	6.49861	5.26569
Clcc1	5.01988	5.51361	5.7979	5.84898	5.07644	16.0412	5.52321	7.54979	5.83187	7.84075	5.92429	6.95585	6.25205	8.08412	7.3873	3.19393	5.14851	5.7359	4.34777	6.15065	18.8359	5.67769	6.25567	4.87348	6.6978	4.73618	4.82664	5.39185	5.69759	5.686
Hnrnpk /// LOC100363335	7.0124	11.6493	9.69603	11.2399	11.7747	6.90867	6.29704	7.08573	7.05647	6.66183	9.5516	9.32583	7.78067	9.18098	8.16379	7.23099	7.85197	8.68903	17.7279	9.65334	5.62854	6.74196	6.91254	7.17689	6.6503	25.0762	7.33907	11.2813	8.50116	7.2728
Car3	5.27859	4.79756	5.09893	7.75436	7.27482	8.33592	8.89421	11.6316	12.9392	23.017	5.38112	6.70078	7.59724	5.64781	7.60536	7.27066	5.51626	6.41223	5.56984	5.88669	7.64989	7.60932	7.41032	5.74243	6.51729	4.73618	3.39157	20.174	5.40474	5.58683
Bnip3l	4.68855	7.83631	5.56939	5.55584	5.86861	8.01823	5.80373	6.95599	5.71634	6.61973	8.43763	10.0698	21.472	8.91204	10.0359	5.50507	8.24457	9.95909	7.95132	5.15348	5.80842	4.65092	8.24681	9.20904	6.96381	12.6702	24.4392	9.32971	6.07657	12.2646
Gyg1	9.41341	9.51903	4.96451	10.9376	11.02	8.12729	8.73461	8.00388	4.81522	6.732	7.42033	8.32682	7.66348	7.9101	6.56294	6.13989	23.2031	9.1382	5.12331	7.10593	7.23804	6.95294	7.41032	4.87348	8.64064	25.1065	9.18785	14.5571	6.70532	10.6495
Gusb	6.96702	5.25851	6.94046	22.1134	5.18893	9.84853	5.39746	8.89209	9.1175	5.76361	7.83001	6.2119	5.92085	7.18237	6.34489	7.24091	6.8332	6.1799	4.69637	5.9663	5.89363	6.24967	18.9261	5.96772	7.36758	4.36785	4.9904	2.56178	5.09036	4.62814
Gng11 /// LOC100912034	10.766	6.20728	8.71926	9.28875	5.78423	5.59522	5.99718	9.06175	7.8929	7.23725	6.14985	7.19497	4.71834	7.31947	8.71691	8.30224	7.33016	6.04051	6.28272	7.94808	8.88542	8.70641	10.6741	19.9123	9.78544	9.00003	7.08481	11.991	22.3597	5.04845
Resp18	3.59925	6.00589	4.85249	5.43218	5.67642	8.88122	10.0066	23.2532	4.96772	6.66651	5.62509	9.53307	5.82404	9.1177	7.91382	5.15791	5.15348	7.0834	6.5804	5.61435	7.69722	19.2413	10.3149	5.11716	8.55039	7.82574	5.11968	5.35723	8.20401	7.8584
Acp2	10.7977	11.0943	9.9559	6.32991	11.0622	6.51037	7.62223	22.6743	9.53802	7.98578	7.82081	7.84326	8.64689	9.78742	8.63713	8.24273	10.8437	8.90587	7.1366	7.2819	9.40141	10.1598	7.30256	7.3608	7.07307	9.36836	5.2188	23.0257	6.15408	9.14294
Cltb	8.10171	8.87011	9.96935	9.00935	5.52643	5.86549	6.12777	6.33224	7.52321	7.10159	6.40763	10.7181	9.00357	8.10521	8.22761	6.09526	5.46656	6.30381	4.79821	4.0725	23.5035	10.0051	7.68231	5.4298	19.4284	6.52578	5.87815	4.73409	5.87846	4.61398
Dcxr	5.63716	5.0974	7.8769	9.1376	8.02011	24.6521	12.9181	8.87213	8.31804	11.429	6.82652	5.86119	5.82914	7.44076	6.71718	6.67552	6.66423	8.12112	8.42918	18.8961	6.24867	5.88398	8.17496	7.17689	7.38183	4.38519	6.77453	8.15701	8.7251	5.98353
Idh3a	5.09704	5.24061	7.30339	8.47346	9.25758	6.9466	8.23162	5.23446	9.75522	9.08984	18.1596	7.21091	5.0954	8.17904	3.41443	6.80943	5.4765	6.85107	6.01637	6.06267	5.92677	5.04944	7.26663	5.64588	6.6028	5.19116	5.10675	4.95911	5.4435	15.7829
Ltbp1	8.90053	20.9535	9.7498	6.75587	10.8279	9.0377	7.64157	7.01088	6.91784	7.35421	7.27303	5.66458	5.21259	7.85209	8.58395	8.43119	2.87243	7.90945	5.25257	7.1604	25.0894	10.488	7.57454	6.37231	9.59068	12.5662	6.96846	5.29664	9.89649	9.99773
Cyp2d2	8.50112	7.90791	6.87325	6.42609	5.75142	6.6052	5.68765	5.2644	8.91879	20.5282	6.5135	6.14282	6.85841	9.85598	8.12124	5.75801	17.9403	7.09372	5.61684	6.36014	5.76108	5.28855	8.23654	2.9103	6.7263	6.25279	6.23584	7.03623	6.88189	2.73438
Nup210	7.17126	8.92829	7.43332	21.3073	11.5403	6.30173	6.26802	5.88814	5.66089	6.76943	8.50208	6.24379	8.92714	8.16849	19.8377	9.59172	9.06952	7.23828	3.50563	5.77357	6.59424	7.51086	7.08189	3.72867	6.98281	9.02603	6.25308	8.63734	7.97576	8.56679
S1pr2	5.50553	7.02179	4.98243	6.99862	5.71392	6.91341	8.50729	11.412	8.43819	6.20336	8.84271	7.29062	5.70175	5.45797	7.29157	19.8183	4.61676	5.98371	4.37518	8.24556	5.70901	6.25905	25.1202	4.97923	6.92581	6.01447	6.70989	4.66486	6.76562	5.06734
Adam17	6.69469	6.51608	16.6051	6.18334	6.29516	6.37286	6.19548	6.03784	9.76908	8.12612	7.44334	6.23847	6.71573	9.11243	8.62649	6.10022	7.7327	8.28117	5.91061	3.24292	8.37416	7.47804	6.38909	8.98836	24.2973	8.44105	7.57609	6.85015	10.1247	8.11342
Acsbg1	4.31183	9.71594	7.33923	18.1882	9.68414	6.68581	6.93545	5.96299	6.74686	6.38581	7.0935	8.96449	8.45327	8.30033	8.52544	5.6241	23.2677	8.5548	8.28817	8.58913	8.20374	6.91074	7.33335	5.47577	8.41263	6.56045	6.16689	8.81909	6.54598	10.8809
Pacs1	7.99732	5.3704	8.19055	3.47183	4.63582	6.67633	6.07457	5.57876	6.88087	5.26771	6.57795	5.6752	7.3068	17.3706	6.04174	6.39283	5.4268	6.16958	8.57019	18.8961	9.24992	8.52825	7.87732	6.04588	5.41524	4.69284	4.78354	4.43983	5.63299	5.86546
LOC688815 /// Phb	6.59938	22.0902	4.98243	7.85971	11.306	4.24857	6.38893	8.97193	7.21821	7.86414	8.02795	7.88577	8.48384	8.72747	6.65336	9.32887	9.5466	7.69261	7.0896	5.73586	11.1861	10.0614	8.23141	6.3861	8.89715	21.2066	10.9246	5.91978	9.99985	10.3
Cd59	8.83245	23.9564	5.20646	7.62154	6.89514	11.3232	6.38893	9.12163	9.52416	10.4933	7.53541	7.84326	7.94882	6.64975	8.55204	9.63636	8.39366	7.01112	9.52983	6.00401	25.1083	6.43252	8.76512	9.1079	10.859	4.91817	5.77903	7.75456	6.52876	6.38495
Ptbp1	9.75382	21.4995	10.1665	11.2812	8.49354	11.4038	4.74938	10.8481	9.81067	7.95771	6.14525	8.22054	4.68267	6.4019	7.60536	8.26753	5.61068	7.65131	9.22431	7.21068	8.35049	20.0758	7.87219	10.2113	8.18937	5.78914	4.55945	8.17432	5.9043	5.06262
Hmgcs1	8.25149	4.92286	11.0178	5.64745	5.44674	7.05566	6.24868	7.12066	5.96126	9.15534	19.7062	7.04618	4.68777	7.04526	7.21179	6.20933	7.47428	5.13185	5.75785	6.7079	6.24393	5.96368	9.02684	6.02749	7.46734	11.7039	6.88657	19.4989	10.2453	5.16652
Smu1	7.19849	7.75127	27.0046	5.91768	7.27951	6.74745	4.78807	6.43703	7.57866	20.2802	6.71144	8.34276	7.36795	7.35639	8.90305	5.20254	7.51901	5.8185	4.53578	9.02487	8.38363	6.32	7.07676	8.42745	6.57905	5.94947	5.93418	8.26952	5.70189	11.2067
Stk10	6.41782	5.56731	6.57753	19.7867	7.34044	6.32544	7.04185	6.36218	7.21359	7.19983	7.77477	5.79211	5.38584	6.68667	9.28066	9.04617	6.8332	7.06791	4.75904	8.92431	6.90194	24.7502	7.25637	9.00675	9.53843	5.09583	6.60215	10.286	9.78021	6.89499
Ugdh	9.05485	22.1395	5.42153	12.2476	10.5326	7.0035	7.37557	7.1007	7.15814	5.86653	18.4173	7.45535	8.18321	9.68196	7.72768	9.80498	8.70674	7.64614	6.741	7.95646	7.33272	7.42178	7.6977	9.62743	7.35808	5.66348	11.2564	10.7447	9.91802	12.6613
Rbp1	12.5769	18.1788	13.3925	11.0247	9.71226	6.93238	10.9304	9.80525	10.7025	8.37407	7.79319	9.44805	10.5831	10.4624	8.08401	10.1521	11.1319	9.56671	18.0804	7.23581	11.2807	11.4351	8.61116	6.94701	7.45309	10.0443	12.2002	7.89304	6.36511	12.9682
Cxcr7	4.63863	5.24509	8.06061	8.36812	8.99978	3.63215	7.75281	6.16259	8.4613	6.98931	6.12223	5.71772	7.07751	8.37415	8.16379	9.75539	9.32794	5.96306	6.38064	6.46489	7.35165	8.42979	23.2522	6.04128	5.68126	20.431	8.36473	7.40405	10.7621	7.58921
Acp5	11.7554	7.438	10.8744	8.94981	9.38883	7.45397	7.83019	7.09571	9.08977	7.63958	4.81493	8.97511	9.49782	8.24759	7.76491	8.10386	8.25948	7.05242	14.4808	8.26232	7.7493	7.4968	6.07605	8.95158	6.52679	9.91	12.963	11.9391	19.1125	6.60691
Atox1	8.10171	6.27441	8.41906	6.6322	6.25766	11.6978	9.60517	13.1136	23.4338	8.10741	8.2489	7.25342	7.49023	6.31753	8.22229	9.24455	9.90441	6.96465	6.11037	5.50123	7.73983	7.74997	9.45278	4.94705	8.9399	8.27639	7.61057	6.13182	4.75445	24.2694
Pdlim1	10.766	8.58816	4.52541	6.10089	9.8107	6.82806	6.38893	7.53482	6.44648	6.1098	7.91747	8.22054	6.4253	9.49739	6.74909	5.16783	8.48311	8.35345	7.07785	7.49139	6.57057	20.118	7.70284	8.45044	6.21328	9.51568	14.3075	12.1901	14.0696	22.744
Prkag1	5.88225	8.57026	9.0329	9.04141	3.9749	16.321	8.58468	7.05579	5.54074	7.99513	8.92557	8.91666	9.34496	8.05248	6.84482	8.94202	9.32794	7.77521	16.1455	8.5975	6.37648	4.65561	6.11198	9.02514	6.37004	7.92107	8.70949	6.4304	8.17386	7.67894
Kdr	5.77332	8.38677	8.02028	5.53752	8.82166	7.0035	6.29221	9.44098	9.21917	7.71911	17.4461	8.14084	8.76918	5.62144	6.57358	7.17643	6.09273	9.0969	15.8126	5.90764	5.96464	7.91875	8.72406	5.25968	8.40313	6.30479	5.92556	8.17432	3.29883	7.2114
Penk	5.30129	4.60959	4.81665	5.16652	4.68738	5.19691	15.8829	7.56975	7.52783	5.34724	6.24191	6.01529	5.98709	21.3045	7.45112	6.12997	6.95744	6.08181	5.35049	6.73723	5.56226	7.06077	5.89644	6.46886	6.81181	3.82621	7.15376	6.11884	4.30657	3.00829
Slc22a5	6.31797	8.24804	5.41257	9.82464	6.82952	6.19267	6.78069	7.39011	7.57866	8.13548	8.32255	8.82632	9.49782	7.46186	6.66931	5.49019	9.76526	9.62867	16.925	8.62683	8.83808	8.52356	10.4022	9.17226	7.8616	10.3433	7.1236	10.7447	5.98182	23.9058
Pgam2	6.73554	4.7349	6.94942	5.76654	5.15612	4.41453	21.9139	4.10673	5.12946	6.26418	6.71604	6.19596	6.64949	6.423	6.40871	6.17957	19.4908	6.65488	6.29447	5.77357	8.03333	8.34071	6.0196	5.48957	5.95202	4.65385	4.38707	5.41348	4.53912	6.11104
Lrp2	7.22119	12.146	10.059	10.9834	10.7482	6.65736	6.48083	5.8083	5.8596	7.72847	7.63668	7.01961	8.03544	7.47768	7.7915	5.51499	7.92651	8.41024	7.6928	15.9255	6.67945	7.6562	7.91837	6.89644	8.49338	10.235	24.4392	14.2932	13.0532	10.5786
Gfra1	4.58416	9.161	6.2146	6.11921	7.2842	7.47293	9.53746	7.07575	6.22467	6.80218	5.2108	8.61377	7.62781	5.13629	6.37148	8.82795	8.87571	6.38641	5.52284	7.62966	7.42739	6.967	7.66691	5.09417	18.1601	8.9307	21.694	7.40838	12.2048	8.71791
Rgs3	8.0427	4.77965	8.49075	8.02918	5.24518	5.84178	7.47713	7.24041	5.08325	7.85946	6.92779	6.25442	9.05962	6.04331	20.3217	6.17461	6.41575	6.78395	6.47465	5.79871	6.5469	6.57786	7.40519	7.88953	6.14203	4.53252	23.4221	7.93199	8.74233	10.5267
Abi1	10.2213	10.0382	8.894	7.0032	9.4357	7.90917	11.0948	8.62762	11.331	10.5354	5.00366	9.89441	9.28381	9.8718	7.62131	9.50245	7.24568	10.2224	15.225	7.67156	6.48536	5.73863	6.85096	9.08031	14.1699	7.40542	4.09833	6.73332	9.03948	7.04611
Actn3	6.70831	6.31917	7.16449	5.53294	5.37174	5.14001	22.0687	6.72645	5.00469	4.83731	5.45937	8.27368	6.33867	3.14822	7.88191	5.43564	19.0236	8.32247	5.54634	6.10037	5.84156	5.61674	6.12737	6.30335	6.52204	4.74484	4.38276	5.2577	6.08087	5.82296
Mlst8	6.51314	14.2763	5.00035	8.60629	9.01853	4.04468	6.9016	6.79132	6.73299	6.49809	4.85175	6.57325	5.58965	5.82183	7.71704	3.50638	7.2755	5.83916	6.87025	7.31542	5.86523	5.92617	8.75486	7.33321	8.22262	13.8532	7.27874	5.48272	4.76737	6.2905
Tnni2	12.5179	5.74185	12.4247	5.40928	5.41393	4.45721	21.9139	6.69152	6.29861	6.10512	6.66541	8.65628	6.25205	21.6209	7.1001	6.77967	4.61676	7.36219	7.78681	7.0347	5.51492	6.00119	8.57524	5.039	7.06357	4.68851	4.67149	8.46857	4.88795	8.82181
Prdx6	18.3276	7.7468	6.00401	5.63829	7.60762	8.37386	7.14342	6.16259	20.9291	6.56359	6.56874	7.7051	7.48004	6.38608	8.92433	9.4231	5.30256	7.47061	6.11037	5.50123	7.65462	8.08285	7.67718	4.98383	6.07077	3.33656	4.86111	7.54685	5.04299	6.75331
Pfn2	6.2272	6.68167	23.6307	6.87496	5.92485	5.46719	3.14368	6.98094	7.12117	6.31564	6.63318	7.1312	8.65199	6.43354	20.1728	7.09212	7.5041	6.62907	6.28272	7.31123	5.9457	4.88534	6.37883	7.07115	5.42949	5.60281	4.37414	7.30885	5.21956	5.72379
Ptp4a2	10.1895	9.28631	8.56244	9.71929	7.39201	8.76742	5.91496	9.33619	6.86701	8.69219	8.36858	8.67754	8.09149	9.49739	7.17988	11.5011	8.25948	9.93844	17.7945	7.4076	19.1389	6.32469	6.65082	7.20908	4.98297	11.6996	6.96846	12.5622	12.2436	11.9671
Cand1	7.01694	6.44	17.1473	5.87188	6.07485	3.1153	5.99235	5.89313	5.84574	6.10044	8.05557	6.76455	18.5574	6.45991	7.13202	8.34192	8.07063	5.66362	7.03085	5.34621	7.21911	4.89941	5.43458	4.82751	5.32974	7.9514	5.13261	6.94968	5.01284	6.60691
Anxa3	14.0248	11.5911	12.6712	12.9575	11.2872	7.18369	8.79264	8.00887	9.24689	8.85125	8.16144	8.56595	8.80485	7.37221	8.21697	9.81986	9.00492	7.73907	6.0477	8.47181	6.73625	8.52356	9.82227	19.025	7.04932	24.8725	14.6652	13.7825	9.75007	13.7475
Snca	23.8376	5.30774	8.02028	7.82307	5.78892	7.00824	9.24243	7.48991	4.68121	6.5168	6.04398	7.98673	3.26105	7.56732	8.35525	10.0877	10.0982	10.3411	13.6269	6.97605	7.7919	9.08148	6.76372	4.74015	6.46979	9.86234	7.49421	12.3372	12.3469	12.1937
Cyp51	11.1155	10.0113	10.9909	6.45815	9.5107	8.50188	9.17472	6.72146	10.5269	11.4103	5.76318	9.60215	22.0885	8.61146	8.8871	6.93342	7.60846	5.52939	5.82052	5.66882	8.04279	5.84647	10.0686	6.55162	10.745	6.77278	12.5923	24.259	8.27722	10.3236
Rabep1	5.04712	8.56578	5.43497	8.0704	11.17	21.0769	7.75281	8.32323	9.38553	4.70632	6.93699	6.90271	6.85841	6.44409	7.52558	6.86894	6.74375	7.28475	14.4338	7.60871	6.31494	5.97306	8.25707	6.47805	8.43163	5.70248	4.02076	5.56927	4.92671	7.98591
Scaf1	4.74756	5.46438	7.14656	9.27501	22.4338	11.3374	11.1286	9.22142	4.93075	11.1717	5.99334	5.97809	5.43169	6.01695	7.06819	6.96317	7.00714	6.89237	7.05043	7.03051	7.12916	15.7391	6.58923	6.31714	8.58839	4.84451	6.1281	4.15423	8.05328	5.686
Alas2	26.0072	10.6065	7.49157	11.1758	9.11696	9.72999	7.75281	7.58971	9.20068	5.42209	7.27303	8.53938	5.85971	8.55345	8.35525	10.9258	10.0436	8.26568	17.5595	5.26241	7.7493	8.4251	7.4873	6.92402	6.77381	9.0867	10.4204	12.8046	9.10839	11.7356
Ptgfrn	7.78853	6.19833	6.60889	7.20473	6.37016	6.82332	5.38779	7.03084	5.49915	7.00334	5.30747	8.87946	8.94242	19.3956	6.69059	2.77733	7.95136	7.60484	8.13933	5.54313	5.37291	8.9549	6.19922	7.62286	5.99477	5.68081	5.77472	5.70341	16.1109	6.78637
Rnpep	8.29688	7.51856	9.33758	8.0246	7.43888	6.10258	6.62108	9.52082	9.50568	8.39278	9.14652	6.79112	22.0885	5.67945	7.54153	9.14536	6.84314	6.49483	6.56865	5.41743	6.32914	9.18932	10.5972	8.53319	6.37479	4.85317	21.694	4.3706	5.82678	5.74268
Slc2a4	4.99719	6.32364	6.5148	5.22149	7.55606	4.74171	21.8752	6.51188	7.01026	5.81974	6.6562	8.11427	6.96031	20.234	7.22775	7.84101	8.16505	5.31771	5.06848	6.10456	6.18239	5.7105	5.97855	6.66196	6.39379	2.54792	4.72752	4.12394	6.23591	7.16418
Gcs1	10.4074	9.61749	8.22191	11.3636	21.0276	5.68057	7.25466	6.07776	6.72375	6.03027	7.39271	4.30423	9.06981	8.39525	7.97233	5.60922	7.20095	5.59134	6.66657	7.57519	7.2049	18.6881	5.60393	6.61598	6.81181	5.79347	5.77472	7.78486	6.06365	6.6258
Dpyd	8.66906	8.7806	10.5832	8.94981	8.98572	8.37386	5.93431	8.45297	7.28753	8.27115	7.79319	9.94755	8.1883	9.67668	8.35525	21.7227	8.40359	8.32764	7.03476	6.20512	10.2582	11.5429	7.33335	6.03668	9.62393	10.1613	5.53339	20.0745	11.4339	12.2551
Cat	12.8356	9.16995	13.8988	6.70091	11.4185	8.34541	10.9545	8.09869	23.2258	12.5751	6.63318	5.86119	8.4125	8.42161	6.95119	6.94333	5.38208	7.23828	8.14325	8.98297	8.65819	11.3929	7.93377	9.61364	7.8711	5.61581	5.8997	8.0921	4.90087	25.6815
Lphn1	10.0806	9.36239	11.9632	9.98953	10.3591	24.6521	12.9181	9.40605	8.31804	10.9705	8.33636	8.16741	6.32339	6.93979	7.71704	9.12553	8.99001	7.80103	7.52829	7.14364	15.4702	6.01525	8.90368	9.18146	7.02557	10.625	6.10225	10.7794	8.63036	10.3708
Slpi	10.9611	6.7667	12.3037	9.12844	8.71385	9.7205	11.5204	9.36613	9.1822	7.66298	7.83001	8.13552	7.80105	9.31809	8.24357	8.53534	4.49749	9.32923	7.4382	7.55005	11.4843	11.5663	10.4894	9.25502	22.6015	14.0005	24.7796	11.6275	9.1127	13.6861
Aldh2	8.95954	7.67967	13.6793	7.52993	8.2873	11.8306	10.0163	10.2843	6.83004	21.9737	5.81382	7.93891	8.12206	8.78548	7.21179	8.9817	8.34893	9.08657	7.2972	6.31405	7.25224	5.92148	6.79964	7.73321	6.26553	10.4603	12.963	23.9388	4.48744	7.52309
C3	6.86262	7.43353	7.23618	7.34672	4.82332	10.9581	5.75536	6.66657	23.2258	6.28289	7.3789	5.99404	8.10168	6.06441	6.99905	7.84101	11.1319	4.67752	5.47583	6.76655	6.21553	5.74332	7.08189	5.71025	7.26308	4.44585	6.15827	4.07634	5.14204	15.4523
Mrpl23	8.66452	9.70252	9.80356	6.90244	8.53104	5.96033	15.5443	6.1576	6.30785	6.54955	5.52842	7.40752	6.63421	7.0769	7.46708	8.332	6.39588	9.00913	6.86242	9.7497	8.53511	6.3622	9.28343	23.0387	8.01836	6.43479	6.15396	4.21481	6.95941	4.85483
Laptm5	13.5482	7.62149	13.0878	6.87954	10.8841	11.2568	9.0925	13.1136	10.6194	8.79979	18.5876	7.05681	8.70294	8.72747	8.90837	5.07359	9.74042	10.0314	7.49696	7.73021	10.6227	11.0741	8.32892	9.27801	9.00166	12.6789	7.67952	13.8388	9.44861	21.3084
Gne	10.6389	7.26346	10.0007	17.0431	6.20141	7.19317	6.50017	7.04581	6.21543	7.32146	7.01065	8.4703	20.0096	6.45464	3.47294	10.7671	10.1131	7.94043	6.65091	6.96767	6.30547	4.10237	7.5027	7.08034	5.458	10.4083	7.08912	8.37337	8.6562	10.777
Ptpn6	6.86716	4.60064	6.96286	8.33606	7.88887	6.50562	6.23417	5.96798	16.4004	5.94138	19.7937	6.50948	7.82653	6.71831	7.77023	8.64445	5.63056	6.19539	5.95761	9.44804	7.7493	5.12914	5.56287	6.96081	8.54564	4.75351	11.4934	9.88361	12.4589	4.73204
Mkln1	13.462	8.87011	13.6748	6.07799	11.2028	11.7926	11.1722	9.40605	12.9392	6.35774	17.2942	8.34276	9.36534	7.73607	8.5414	10.2166	7.2755	8.9575	7.14835	8.66454	9.24519	10.9334	6.46607	5.86657	8.11812	10.053	7.895	12.1252	12.0756	22.9329
Mtor	5.58723	7.20081	8.62068	17.6248	8.97634	7.28326	6.63559	6.36717	7.46313	4.79989	5.30747	6.25442	8.04563	6.8185	7.42985	9.45285	23.9038	7.46028	8.08058	8.8447	5.26403	7.50617	6.32238	9.54927	7.88061	9.14303	5.47306	4.25809	6.15839	10.3661
Mvd	12.999	5.7866	8.36977	5.32225	7.98262	9.85327	8.79748	7.51486	8.7247	5.76361	8.66779	8.41184	8.20869	8.41634	8.12656	21.5293	7.94142	6.85107	5.45625	8.77348	6.97768	7.22487	6.62003	8.5148	6.94956	14.8628	9.18785	24.259	11.0937	12.7793
Adh1	6.79454	8.86116	8.62516	8.51927	5.88735	9.59722	6.14711	9.77032	6.61747	4.78585	7.39271	8.41716	9.42649	8.82767	8.44567	7.97492	17.9502	7.26409	4.75121	6.43137	6.24393	5.56516	7.71823	5.69186	7.59559	8.25473	12.2605	5.50436	24.7585	4.28812
Qsox1	10.8204	19.1947	12.6129	10.3605	10.3872	6.08361	6.67912	6.57176	3.70153	7.38696	7.59985	7.47129	7.44947	8.00502	8.09997	7.03757	9.73048	8.04884	14.8647	7.36151	6.48536	7.76404	7.07676	5.02061	6.6883	7.17143	8.96806	6.81554	10.0989	11.6318
Ddit4	6.08196	5.71052	5.00484	7.95131	6.13579	6.45346	6.08424	5.65361	9.24227	7.71444	6.14525	6.79112	8.35136	6.82378	8.32334	5.28189	8.43341	6.53097	5.38183	16.533	5.61433	9.06273	9.33475	8.19297	9.19166	4.95717	22.6938	7.01459	5.13343	10.3755
Gnai1 /// Gnai3	5.84594	25.6078	9.20316	8.05666	11.4325	6.38708	8.90872	8.01386	7.172	7.86882	6.20969	9.00168	8.58575	7.54623	7.98296	8.28737	8.07063	8.15726	15.3621	8.63521	11.418	7.56243	5.4859	10.2665	6.08977	4.71018	4.74476	5.77265	6.8862	7.57504
Ptprf	12.1276	9.88153	13.6748	11.6109	11.7981	7.93288	11.6897	11.427	9.62583	11.429	8.2443	7.92297	9.09529	8.50599	8.20634	6.32835	25.0518	7.90429	8.108	7.4076	7.64042	7.46398	8.54445	7.71941	7.45784	13.6495	24.7796	10.537	9.1127	7.53254
Cbr1 /// LOC100360507	6.9534	5.36145	7.37508	6.60472	5.84986	7.88072	11.3898	7.22544	10.7534	9.32375	14.4954	6.99304	5.70175	7.76771	6.18002	8.61965	9.31303	21.7045	4.75904	8.6394	6.70785	7.92344	5.92723	5.20911	6.25128	3.60088	6.50303	7.443	10.3874	5.31764
Synj2bp	7.64783	7.24556	25.405	9.4857	10.6544	9.56877	6.50501	7.50488	7.13965	9.77755	8.41922	8.64034	8.86599	9.10716	8.73818	5.69353	7.50907	7.91977	4.25768	6.4607	7.1907	17.2018	7.30769	8.08722	8.9589	7.9254	11.4633	12.3372	12.4589	12.1937
Hmg1l1 /// Hmgb1 /// LOC100909581 /// LOC680968 /// LOC685520 /// LOC690940	26.4157	7.12025	13.3208	10.5987	9.67007	6.70478	6.7033	5.61868	7.13503	7.46181	21.0872	9.13984	7.80615	8.47962	8.83391	9.78018	8.95522	7.3467	7.29328	5.79033	5.40131	4.85252	7.52322	7.3562	8.92565	9.31636	7.38217	12.1425	11.8301	4.8076
Snx1	23.4791	6.59664	5.66348	7.04901	7.86543	6.72848	6.67428	8.94698	6.51118	16.3926	8.61255	9.5065	8.69784	9.58704	8.9456	7.95012	7.9116	5.89595	7.3207	5.97468	7.53627	5.98243	4.09518	7.19528	8.17987	7.93407	6.64093	5.79861	5.52963	6.71553
Slc31a1	11.2834	5.49123	11.5152	7.3055	5.75142	5.87498	7.84954	7.94899	6.71451	20.8276	8.03715	7.82732	8.55517	7.95756	6.75973	6.51186	5.65044	6.50516	7.19927	4.88533	5.52912	7.64682	7.58994	5.6091	18.5591	7.21043	6.38236	5.72505	6.5589	11.0273
Slc13a3	6.02295	10.3649	4.60158	23.5975	8.39042	6.94186	10.3016	6.47196	8.53062	8.53781	5.67572	8.43841	9.36534	9.09134	9.16897	7.81621	7.62834	8.58062	8.16675	18.6531	8.83335	6.30593	7.45651	5.74243	7.58609	10.352	8.44661	10.2211	9.19021	7.57032
Serpina3c	5.05619	6.34154	5.90544	5.75279	6.49203	5.45296	5.73118	5.39413	4.7875	20.4814	8.58954	5.62207	4.40242	7.70443	6.03642	6.64576	24.525	8.60643	5.17815	8.79024	11.2287	10.6755	9.91977	8.06883	10.403	6.79444	6.05915	5.84622	7.29532	5.31292
Tcp1	4.55693	5.33907	6.1922	24.0097	7.48107	16.6624	8.69592	8.76734	7.94373	5.85717	6.48588	8.2046	5.69156	7.38276	7.44048	7.76662	4.39313	7.21247	6.87809	7.86429	8.80021	8.20006	5.26523	6.49645	5.458	6.58645	5.93418	5.64716	6.86036	8.66124
Hsd17b12	12.999	7.45143	12.6712	9.38493	24.9791	7.37336	6.60657	8.48291	7.12117	6.53552	6.92779	9.79345	10.1908	8.622	8.12656	8.65437	8.04081	7.21247	6.43548	8.11568	9.45821	10.9615	7.52835	21.002	5.89027	9.46802	6.03329	7.05354	7.05846	12.359
Lmna	3.21799	7.97504	5.24679	6.43983	7.78106	5.65212	6.31155	7.58971	6.42338	19.5691	4.81953	6.06843	7.17432	6.54429	7.91382	5.46044	5.17335	6.40707	6.71749	6.0501	10.031	24.7033	5.81946	5.28267	5.515	4.8835	4.30519	4.87257	5.15496	4.84538
Abcd3	5.29221	6.79803	6.62681	7.38336	7.41544	6.48192	6.99833	7.0009	5.15257	6.93785	18.6429	6.49885	7.03674	8.18431	4.75468	6.56641	6.8829	7.58935	7.35595	8.26232	5.16462	5.59329	6.91254	7.3654	5.5625	9.60235	7.31752	4.22347	24.7585	6.07326
Crym	8.90053	18.5861	10.9013	9.10554	6.37016	6.79487	6.92094	7.42504	9.11288	8.94014	8.29493	9.80939	21.2223	9.09134	8.73818	9.59668	9.59133	7.09372	6.65874	5.70653	4.73857	9.00647	7.8106	6.0045	8.89715	10.4257	5.91694	10.9481	11.0076	13.1619
Hrsp12	8.45119	11.3271	8.7551	10.4109	10.9497	8.91915	8.26547	7.13064	8.96038	10.7413	6.06699	7.00367	6.40492	5.89566	7.17456	7.48392	5.39202	7.10921	7.35595	6.90482	23.5035	5.72457	7.95943	6.25277	5.41999	5.29516	5.00763	4.20183	4.87503	21.1856
Ddc	12.8402	8.49418	8.01132	12.0781	10.3122	9.41703	8.25096	10.6935	9.42712	8.58927	19.3702	8.99637	7.9692	8.76966	7.83937	9.20984	8.99498	8.53415	7.97874	5.13672	6.79306	8.16255	10.2739	8.09182	9.50043	11.6866	10.9375	5.27501	18.9963	9.00599
Gipc1	5.22413	10.3649	14.5844	7.14977	9.27633	4.2296	8.4154	8.26335	6.67754	9.02435	7.6735	8.72536	7.98958	9.0597	7.49367	7.41945	9.52175	10.4702	9.33007	17.3794	6.72679	10.4599	6.40449	9.17226	5.93777	10.4777	4.48619	9.57204	6.17992	10.2575
Bak1	8.36042	5.82241	8.7551	5.80776	8.95759	7.80959	8.62337	5.54383	5.7718	17.6651	5.47318	6.47228	9.4061	20.176	8.22761	7.0574	10.4461	9.59769	8.28817	5.99563	5.37764	8.833	7.52322	5.82979	5.629	5.69381	5.06366	5.78563	5.27554	4.96817
Zfp148	5.89133	10.7229	8.66997	4.63521	8.57791	6.84703	7.78183	6.48693	8.71084	5.88992	16.6129	6.52011	8.4125	7.43022	6.18533	20.3688	10.63	9.68546	9.44758	7.45368	10.9446	10.624	9.0679	6.44587	7.41508	10.2263	7.69676	5.75101	11.4425	6.29522
Sharpin	6.36336	11.1704	5.56491	6.4948	8.56854	6.30647	6.21966	7.33522	6.78383	6.6899	7.05668	7.72104	5.45208	4.15544	6.95651	6.31348	7.41464	5.57585	6.45114	8.19109	20.0525	7.51086	6.63029	8.11941	18.0888	4.12953	5.83075	4.92882	6.96803	6.50774
Stx8	8.56466	2.70758	11.4211	7.45207	7.67325	5.90343	3.20656	6.46697	5.5962	5.54841	6.33398	8.28962	6.77688	19.153	18.9123	8.28241	8.89062	8.68387	8.29992	5.64787	5.60487	6.55442	6.82017	8.19757	5.10173	4.20319	7.00293	7.88006	5.69759	8.26454
Lipa	12.8402	10.1232	8.41906	11.5102	11.8872	5.79911	5.95849	3.67759	5.91505	5.81507	7.59065	9.20892	7.02146	8.99114	6.29702	7.58311	7.64822	8.49285	5.4915	5.73167	7.73983	6.86855	21.4355	7.1723	5.93302	9.03903	9.62741	4.48744	22.3597	6.71553
Pdk1	8.84153	6.29232	25.871	9.75135	8.67166	8.69629	6.67428	6.61168	7.59715	7.39632	7.62747	22.281	8.58575	7.50404	7.92446	8.90731	7.1761	7.85782	4.5867	4.11021	7.42739	5.7949	7.95943	6.55162	6.78806	14.8628	9.33437	14.0378	12.7474	12.6282
Slc4a2	13.462	7.85421	12.7249	11.1254	27.0462	9.4929	10.5241	7.86915	8.71084	9.33311	8.8289	9.55964	8.37683	7.93646	6.78632	8.81804	6.49527	7.85266	6.835	7.05146	7.30905	7.78279	7.47704	21.4295	6.49829	7.73041	9.53261	7.87573	9.91372	5.82296
Dnase1	11.5285	8.19881	9.23453	5.67035	7.34982	6.15474	5.66347	7.52983	16.2987	16.8557	7.22239	7.52443	3.81136	8.90677	7.25966	5.55963	7.63331	9.13304	6.15346	6.79169	7.1765	7.28582	7.44111	3.25052	5.75251	7.68274	4.61978	9.21287	4.61664	5.65767
Gchfr	11.5012	11.0496	9.52577	10.475	10.9216	8.93338	6.6501	7.36017	6.47883	23.017	8.05557	9.80939	8.27493	10.589	9.75932	5.34141	7.64325	8.3328	6.12996	3.42727	8.71973	6.55442	7.90298	5.47117	6.96381	9.16036	5.95572	20.0355	10.2152	10.3236
Lss	12.8402	8.59264	13.6793	9.50402	11.9435	9.69205	11.0513	6.22746	8.50751	8.70155	4.4835	9.76156	21.6962	9.65032	9.39767	9.96369	7.75755	9.24662	8.19417	8.5975	7.78717	7.64682	10.2482	6.60219	10.5787	11.158	12.0321	24.0599	10.0343	8.12759
Cdk5	6.53583	8.95961	9.87525	8.71622	5.35299	9.0045	5.78922	10.0997	16.3126	9.77755	7.29144	9.05482	6.84312	4.30309	8.69563	6.33331	6.39588	7.18149	7.16402	8.6394	18.301	5.9543	8.01074	5.94933	6.37004	8.25473	5.45151	2.2805	8.5227	7.20196
Pde2a	11.592	7.82735	14.0109	4.57109	7.617	9.48342	6.67428	7.06577	8.85872	5.39402	9.63906	7.69447	6.95522	7.15073	17.9976	6.93838	5.95855	8.10564	4.55928	8.53466	6.31021	18.1583	7.5027	9.17686	8.33663	4.48918	11.2305	13.6094	6.23591	10.2055
Oplah	7.83392	10.4186	25.8128	8.49178	9.29977	8.34066	6.56305	6.42206	9.71363	6.97995	6.84033	9.43211	8.25964	6.47573	9.17961	9.79506	8.35887	10.3205	7.84165	9.01649	9.50082	7.15454	24.6583	7.90332	4.95922	5.70681	10.7177	10.3683	12.2048	11.6318
Ak3	10.9793	9.78755	10.0769	8.98645	7.88887	7.12205	6.91611	9.52581	8.32729	7.04545	8.13382	5.42545	23.3777	8.85403	8.9456	7.44425	6.6543	6.75298	7.19927	5.89926	9.60023	9.49875	7.27176	7.18149	8.37938	9.22103	13.6094	24.259	8.61313	12.1418
LOC688682 /// Snrpn /// Snurf	8.97315	4.72147	22.3493	8.15743	8.40917	7.16472	7.37557	6.92106	6.78845	6.54955	7.43414	8.37465	6.76159	7.60951	6.22788	6.5069	9.65096	8.98848	5.88711	7.14364	7.28065	7.76404	7.51809	4.52866	20.0649	8.03373	7.78726	5.98036	8.05328	9.16183
Hsd11b2	4.77479	20.7342	4.35515	4.06268	5.6483	3.81233	6.7565	6.16259	6.57588	6.6244	5.16017	6.49885	5.81894	5.65308	6.32893	10.6431	10.0535	9.68546	5.62859	6.25121	5.60487	6.67163	6.48147	18.3169	6.42229	7.8864	6.41684	4.7514	5.00423	5.13818
Abcg1	6.18181	10.8393	4.34171	9.19714	10.1341	6.39656	7.58837	6.56178	6.64981	7.07352	6.56414	6.25442	7.93353	8.07884	8.84455	9.09081	9.06455	4.99761	17.4694	9.41452	7.1481	8.99709	8.14417	10.009	5.65275	7.68708	21.6035	5.73803	9.10839	11.15
Plk2	8.17433	6.35945	5.65452	8.47804	8.85916	10.446	5.49903	7.98891	5.06014	5.04315	17.5335	6.823	8.55517	5.73218	21.4173	5.61914	5.22305	9.35504	7.8299	7.34894	8.61559	5.51359	6.86635	6.94242	7.95186	5.82381	6.64524	5.96738	7.04985	6.81943
Atp2a1	5.58723	6.73985	6.66266	5.73905	8.06699	4.98354	22.9924	6.06279	5.09711	6.5823	6.04398	8.42247	6.6393	3.53318	8.96687	5.20254	20.3505	6.8046	5.421	4.856	6.33388	6.25436	5.76301	7.29183	6.33204	6.15746	6.40391	7.95362	9.84481	4.86427
St3gal5	7.57975	7.70205	7.23618	8.94065	5.2405	5.41029	5.83758	3.50294	6.10452	6.15658	7.807	7.79544	21.3548	8.60091	5.62158	5.16287	8.33899	6.28832	6.19263	5.72329	6.27707	7.0092	6.40449	4.85509	9.15841	6.40445	5.64544	8.04882	5.06452	21.1289
Rps6kb1	26.688	5.88059	8.60724	7.20015	8.4326	7.69579	7.08538	9.97491	7.35685	6.4747	19.72	8.70942	8.77428	9.24426	8.17975	8.34192	4.94972	8.62192	9.3379	8.06121	8.40257	6.97169	7.11268	5.38842	7.6811	13.6495	14.6652	10.814	14.0265	9.56798
Rnf103	4.62501	7.16501	5.31848	7.96048	6.08422	6.33018	7.64157	25.2841	7.42154	9.4641	6.09001	6.823	7.97939	7.48295	7.19052	5.06863	7.97124	6.92335	8.06491	5.6353	6.04038	8.01721	7.30256	6.02289	6.08502	8.1594	9.4852	5.31395	23.1822	10.1583
Dusp5	9.63128	14.9118	11.4435	4.93751	5.17956	8.92389	9.2908	7.06078	7.11655	6.00687	8.02795	5.18633	7.02146	7.89427	6.90332	9.11561	9.31303	6.78395	7.20319	5.45933	5.42498	5.70113	6.16843	3.3011	6.12778	5.53782	23.4221	7.92766	5.82248	7.2728
Aacs	8.18795	8.54341	6.92253	8.62919	5.65299	6.57201	6.73716	7.26037	7.43079	3.39173	7.93588	8.36933	9.1921	7.71498	6.33425	7.29546	7.80724	5.64813	14.9861	5.07387	10.0168	9.65347	7.43085	7.32862	7.72385	10.5253	22.6938	8.72389	12.2048	13.2374
Neu2	6.672	8.86116	7.45125	9.53608	8.67635	7.46345	7.34655	8.01386	7.46775	6.19868	6.01636	8.13552	8.3055	6.70776	8.79668	5.92663	7.42955	7.71326	4.94314	8.55561	9.72804	10.263	7.74389	19.4801	5.88077	13.1122	23.435	4.09798	8.94043	6.8761
Capn6	9.75382	7.57226	9.42271	4.98331	9.44977	6.64787	24.5207	6.92106	6.85314	8.86996	8.35477	7.46598	9.16153	7.86263	6.80759	6.55153	6.07285	8.57545	7.05043	6.46489	15.6406	7.03733	7.65665	5.43899	5.90927	10.534	6.07639	8.14402	4.97839	9.176
Tob1	10.7614	9.49665	5.64108	7.33756	11.4747	6.75693	20.55	7.12565	8.82637	3.64436	6.81731	6.42977	6.24696	7.82572	6.50444	6.34819	7.31028	7.27442	7.8769	7.80144	5.99778	7.59525	9.62213	6.193	9.34842	4.42852	10.1402	10.6928	10.7707	21.1714
Ninj2	5.26951	5.21824	5.659	7.85971	8.03886	4.64213	22.0687	4.79534	21.04	5.56244	5.22001	7.94954	7.42399	6.0064	7.32348	7.58311	5.85419	7.11954	5.73827	6.37271	9.70911	8.2235	5.85539	7.59988	6.46979	4.18586	6.58922	5.92411	5.12481	8.78875
Tmpo	5.9004	5.85821	5.40809	5.36805	5.6108	6.58149	5.57158	6.01788	23.4338	9.68398	5.74477	6.62639	7.91315	7.09272	7.66918	5.38108	5.65044	5.78753	7.88473	6.31405	6.2392	5.673	7.30769	6.54242	6.6123	23.2562	4.49911	9.33404	6.8862	4.23617
Alpl	4.04859	7.84078	4.55229	5.18026	7.22326	20.1712	6.0794	5.65361	4.91689	3.635	6.28795	7.64133	7.39342	7.00307	6.5789	6.11509	5.25784	6.05599	5.82052	5.63111	6.18239	5.93555	5.53722	5.32405	5.87126	5.51182	22.6119	5.62552	8.09635	5.82296
Cnbp	11.5239	7.34402	9.63778	7.46123	4.98269	5.95084	9.17956	7.48492	6.91784	7.04077	19.0986	6.69547	6.48644	4.15016	6.91396	6.75983	5.35226	5.39515	6.86242	8.31679	4.80485	22.1153	6.60976	6.96081	6.6598	5.99713	5.92125	10.55	7.35131	5.48293
Anxa7	4.93365	5.50466	5.36776	21.7516	4.54208	6.79487	8.95708	9.45096	8.3088	6.17997	8.07398	6.4404	9.86979	8.61146	8.90837	7.2657	6.66423	5.32804	5.62076	17.5805	6.62264	6.45596	6.98438	3.59075	5.33924	9.45935	7.56748	8.80178	7.1489	4.7226
Rgs2	7.0941	4.84231	19.401	7.80475	9.97944	7.37336	6.51952	6.15261	7.48624	6.40453	7.517	7.85389	8.03544	6.79741	8.64245	8.41631	4.19931	8.34313	2.67525	15.5652	8.71027	6.97169	7.15373	5.20451	5.67651	7.46609	9.11027	6.10585	11.0507	6.8336
Dusp1	10.1487	4.18443	12.1917	7.80933	6.25297	6.48666	16.7921	7.12066	7.36147	6.97995	5.72175	10.2186	9.42649	9.59758	5.63222	6.249	5.23796	6.79944	5.86753	8.5975	7.82504	5.64018	7.38466	3.34247	7.91386	7.8864	8.2139	6.58186	16.2315	6.82415
Slc27a2	9.88999	9.92181	7.24066	10.672	10.0685	6.72848	5.94882	7.53981	7.28753	21.1363	7.65969	7.60945	6.93993	6.80268	6.75973	9.09081	5.40693	6.69102	8.79737	5.90764	4.01903	6.39033	9.78635	9.31939	8.59789	7.78674	12.963	13.6094	4.08263	25.6815
Matr3	6.86716	14.3703	7.30339	6.27494	5.56861	5.42926	5.6151	5.7584	5.24499	5.94606	6.62398	6.47228	7.56667	4.16598	3.21233	11.7789	10.0883	8.68903	13.4546	6.01658	5.39184	8.77205	6.33264	6.3907	5.98527	7.61341	5.00763	5.61254	8.06189	8.2551
Gucy1a3	8.31049	11.2689	20.4226	9.21088	10.6544	8.22212	21.5705	6.84621	6.15535	5.8946	7.89446	7.81138	8.95771	8.30033	8.1957	8.43119	9.57642	5.78753	6.82325	7.05984	8.95169	9.44718	7.42572	7.7424	8.76415	11.4743	5.6713	10.7447	6.93788	11.7451
Cyp2c12 /// LOC102552121	4.52062	9.161	6.48344	5.16194	7.04045	6.63839	10.2097	8.59269	8.67849	10.367	5.47779	8.9326	8.49403	6.55483	6.16938	9.59172	7.04192	7.59452	8.72687	5.57665	10.1162	10.5302	10.9923	19.7928	5.97102	7.27109	22.1637	10.0697	7.87671	6.64469
Scfd1	9.97168	7.68862	11.2194	17.0843	8.12792	5.10208	6.56305	5.12967	6.42338	7.62555	6.52731	6.76986	3.56678	8.63782	7.35539	10.0827	8.57753	8.79745	6.76841	8.4341	5.86996	6.43721	9.12948	6.1884	8.33663	10.3823	7.20548	19.8278	6.94649	5.34126
Igfbp1	14.5558	5.96114	10.628	6.1696	4.59832	5.51935	15.7571	6.76637	6.19232	7.09691	7.36969	8.22586	5.7629	8.53236	21.2046	5.75801	8.76141	6.5826	7.71239	6.89225	5.43445	6.71383	4.60836	5.72864	7.87586	10.2393	7.75278	11.1039	4.03525	9.95523
Ahsg	8.31049	6.1312	8.64309	6.09173	6.45453	10.9581	5.73118	8.86215	8.48903	23.017	7.41112	6.4776	7.83672	9.69778	7.35007	7.83109	4.95469	8.60643	4.98622	5.41743	5.78949	5.37763	7.29229	5.72404	8.10387	9.60235	9.6662	4.27972	10.086	14.8431
Blvra	12.173	5.36145	11.4838	4.97873	5.22643	6.7759	6.06489	6.87116	5.38362	8.37875	8.32716	6.37132	8.20869	5.87984	23.0448	5.82744	4.77579	7.8888	5.53067	6.05429	6.5469	5.76208	6.697	5.74243	5.5245	20.548	8.87756	13.6094	5.56839	10.725
Prps1	7.0124	9.90391	10.619	7.94215	8.09511	6.22112	6.57756	6.46697	5.50377	16.7669	7.2408	8.75193	8.03035	8.90149	8.44567	7.36489	6.93756	6.86139	8.19025	6.31824	7.73509	6.6857	4.63915	7.89412	6.78331	11.5566	7.23995	9.01382	21.7008	13.2752
Ctse	18.2413	8.21671	5.87855	7.6536	6.19203	5.44822	5.59092	6.81128	6.94095	6.13787	5.59747	5.49985	8.6367	8.99114	8.67968	6.35315	6.56484	9.44281	8.44485	6.76655	6.58951	19.9118	7.66178	7.11253	6.6313	6.64278	5.47737	6.76361	6.44262	4.70843
Pick1	2.99559	8.0735	4.92867	7.00778	5.96704	6.97979	6.57272	6.72645	7.35223	6.22675	5.85985	16.744	5.96162	21.0725	6.7225	4.04201	5.5908	5.5139	6.80367	7.45787	7.5126	7.67027	9.14487	7.20908	7.19182	5.50748	5.24466	7.76322	7.46328	9.49242
Lox	6.45413	9.58168	10.2785	10.5117	10.3919	8.3217	24.9367	11.8062	8.05926	11.3962	8.58493	7.63071	7.83163	9.50266	8.77541	8.76348	10.133	10.7129	7.4382	8.79024	7.30905	8.74861	9.23211	10.1975	9.41017	5.73714	9.17492	22.1646	7.91547	11.4995
Nop58	7.72499	5.79555	7.26754	5.89478	6.76858	7.12679	5.46518	5.12468	6.95943	7.05012	6.28334	8.55	23.1025	6.29116	5.68008	8.52046	8.33402	9.41183	9.54942	9.98433	8.44517	4.81033	6.64568	8.04585	6.26553	13.6755	22.8533	10.8356	4.47452	7.64116
Zhx1	5.44653	6.34602	5.19302	5.58791	18.4777	6.75219	6.03104	6.05281	3.78471	5.92267	5.67112	7.5138	5.72213	9.08606	6.28107	7.36985	9.99387	5.64813	7.93565	5.86993	18.8928	8.10629	5.87591	6.7723	5.88077	6.66878	5.91263	5.46974	4.3281	6.96111
Rara	9.28633	8.05112	11.8198	7.36046	5.73267	6.70478	6.30188	24.7651	9.62583	6.732	6.90477	8.42247	6.36925	8.37943	7.63727	10.6431	8.39366	8.34313	6.38847	6.98861	5.95044	6.56849	6.4712	6.75391	7.23458	23.2346	7.9424	11.1688	6.60627	5.0579
Acsl3	26.0072	11.1033	8.57588	9.27501	10.8325	7.06515	6.28253	8.76235	7.06109	6.48873	8.60795	20.6816	7.89277	7.38803	7.88191	9.01146	7.05186	9.31374	5.27999	7.50815	4.65336	6.84979	8.87289	8.62974	7.64309	7.42275	10.6746	10.2341	10.7621	11.9387
Pdzk1	8.55559	9.19233	12.6129	7.79101	8.59198	6.88022	9.25694	7.96396	6.67292	6.16126	8.17065	8.45435	8.3004	20.4344	8.97751	8.40639	7.95633	6.93367	7.77506	4.1144	7.38479	6.69976	6.91254	8.18837	7.21558	20.379	10.5884	9.58935	8.89306	8.7982
Crlf2	8.58282	11.3584	5.77102	8.88111	10.6544	10.0429	7.21597	10.0697	7.73578	6.48406	8.93938	9.09733	9.4061	7.64643	8.04679	11.0945	9.52175	8.30699	8.12758	9.8335	6.99662	23.9063	7.0357	6.66656	7.98511	10.105	18.5438	9.33837	7.15751	11.065
Mthfd1	6.67653	5.0795	7.66183	6.95282	5.32956	8.20316	21.5028	9.7304	6.50656	9.90386	7.06128	7.95485	8.64179	7.4144	8.99347	6.71024	6.89781	7.40865	7.28545	6.21769	8.06646	8.69703	8.36484	7.71482	6.84981	7.98607	9.14906	14.1677	23.7033	11.0178
Psmd9	9.56773	6.64139	5.66796	4.81384	6.59046	9.03295	23.2633	5.72846	8.31804	10.8395	7.17176	7.34376	7.20489	8.45853	7.80746	5.85224	8.44335	5.49841	4.74729	5.86155	5.70901	7.10297	24.6583	6.21599	6.22753	4.40685	10.1833	11.052	5.35306	10.6683
Gpnmb	8.56466	8.46285	8.56244	6.77877	7.26076	6.8897	6.50017	21.5416	7.0195	7.03609	9.49176	7.41815	7.3068	8.9595	7.82873	8.96682	7.70288	5.56036	8.30384	6.54868	7.32325	8.21881	5.90157	21.3928	8.8449	8.42805	7.79588	9.39462	4.72	11.0934
Ren	10.3076	6.66824	8.19951	6.87954	9.10759	6.80435	6.38893	7.63462	4.3069	6.01623	7.41573	7.96548	6.91955	6.42827	6.12683	6.67056	9.15897	10.1708	7.80248	5.60598	9.18838	8.26101	6.45068	6.07806	15.937	23.1999	12.1829	14.1677	12.2048	8.39677
Clps	7.47536	6.63692	9.6333	7.6994	6.15922	6.99876	5.58125	6.5019	6.68216	5.57648	5.80921	7.88577	6.87879	7.51986	8.87114	8.20801	21.8762	4.05282	4.51228	6.31405	5.66641	5.08694	6.98952	5.57232	6.00427	5.13483	2.73222	13.7003	4.90087	6.39912
Npr1	4.92457	5.0616	6.96734	6.92992	4.92175	22.3192	5.06375	6.23245	16.4928	5.86653	8.19366	5.42014	5.96162	6.0855	6.81291	7.17643	7.04689	3.30937	5.6756	5.761	5.8889	5.40576	6.79964	6.08726	7.53384	4.44152	6.54182	4.61293	6.7527	7.05556
Lig1 /// LOC100911727	6.53583	11.1704	10.5832	6.5177	10.1529	5.85127	3.41936	6.37216	7.59253	7.20919	7.42033	8.26306	9.51311	8.89095	20.0398	7.76662	6.33127	6.63939	6.32189	6.27635	6.41435	7.253	7.11781	6.80449	7.19657	8.07273	10.2394	23.9388	9.25051	11.8679
Fxyd5	12.5769	6.72195	11.1881	9.54982	8.80291	6.95609	6.77585	7.89909	6.40951	5.87588	8.07858	7.71041	8.973	8.58509	8.02019	9.14536	9.76526	9.96425	7.88082	5.50123	5.35397	9.21276	9.50923	20.8456	6.36529	5.88447	6.86503	9.23451	21.6362	8.59512
LOC100911847 /// Rps14	11.7827	7.55883	11.2911	6.83831	9.52945	7.50138	7.27884	3.66262	9.33469	6.08173	7.55842	9.28863	8.13226	8.24232	7.70109	6.53169	4.86524	23.5838	5.84402	8.71482	6.19186	7.61401	9.22698	7.96769	8.50288	7.40109	9.62741	10.537	20.3916	5.92213
Por	9.24094	10.7184	8.0158	24.0097	8.10918	9.17521	6.89192	6.64661	7.30139	6.23143	8.12001	9.01762	9.60992	7.87318	9.07324	7.11196	11.8773	10.5477	10.2466	7.64642	7.78243	20.118	6.01447	6.85046	7.22983	7.70441	8.70518	10.2341	11.2918	6.95638
Smad2	6.39059	4.67672	11.8915	7.99254	7.99668	6.18793	8.18325	7.87913	8.03615	8.02788	5.02207	7.68384	7.70934	6.4019	6.22256	9.4231	5.99831	8.75615	13.9089	7.41598	5.52912	5.51359	6.78424	8.14699	7.93761	18.0347	11.5408	13.8691	10.9559	8.58096
Tpp1	5.22867	7.83631	5.42601	5.0795	9.00447	6.52459	6.50017	5.92307	8.83561	5.96477	7.58144	6.97179	9.12076	7.72025	4.69086	9.61156	4.70621	6.944	16.5176	7.41179	7.50314	5.12914	5.56801	8.95158	6.38904	6.46079	6.93829	20.4423	6.99386	7.23502
Ralbp1	11.297	11.694	6.61337	6.29326	10.3638	6.84703	6.21966	7.00589	6.29861	6.89106	7.90366	8.59251	9.66087	7.52514	6.2917	7.54344	20.5592	7.41898	6.51382	3.8672	7.47947	7.92813	8.30839	7.24586	8.55514	14.7328	22.5904	14.0378	12.7474	11.7451
Gtf2b	12.8992	9.51903	12.3217	5.50088	5.02019	7.39232	17.5273	7.86915	8.19789	6.10044	8.41001	8.48624	7.94373	8.93313	9.69018	7.95012	7.12144	8.00238	5.7931	9.67848	9.34933	8.51418	3.56147	7.18609	8.57889	12.6789	10.6746	9.59801	19.2374	6.64469
Nr3c1	6.94432	5.83583	8.23535	9.85212	9.92319	5.97455	6.29221	6.63663	3.4982	3.51337	7.13953	6.70609	7.55138	21.2992	8.83923	7.22603	5.8691	7.99722	8.06491	6.34338	10.8547	9.47062	7.22558	8.01826	7.45309	9.25569	5.88677	8.81043	6.17562	21.3178
Adamts1	14.1973	5.85373	11.7885	5.31767	3.21555	6.88022	5.58609	7.41506	6.89936	7.63491	7.01065	7.95485	7.57686	8.11576	19.9601	8.5651	7.54882	7.1247	8.06491	7.67156	7.03922	8.05941	7.66178	9.38375	8.34138	8.29806	24.4392	8.72821	12.8163	13.1619
Serpina3n	9.46788	10.1545	11.56	7.44291	13.1856	20.6596	7.45295	6.86617	4.5703	6.81621	8.12462	7.99205	8.05073	8.51654	9.16897	7.42937	5.5908	7.24861	8.05316	6.64086	9.50082	6.55442	9.46304	9.31939	8.43163	13.7449	9.18785	14.1677	12.0369	24.1466
Mvk	11.2562	5.65682	13.3925	11.0247	9.67007	6.78538	7.13858	8.49788	9.45484	9.29569	17.2067	9.46399	8.00487	8.75911	8.06806	7.67239	8.24457	7.07307	7.30503	6.93415	5.9031	9.30653	6.38909	7.61827	7.52434	10.118	24.4392	7.2526	13.0532	10.1205
Prkcb	9.33626	4.87811	7.07039	5.46882	6.52953	7.44448	6.65494	6.49192	7.4123	5.75425	20.498	7.9336	5.78328	6.9767	6.898	7.07228	10.5852	8.12112	7.08568	13.487	7.67829	7.51555	8.01074	5.50796	9.07291	4.34186	3.7234	6.22702	5.55978	7.07917
Klf15	10.1623	7.67072	10.4353	8.14827	4.73895	6.81858	24.9367	9.93	5.99361	5.45484	6.00715	6.5945	7.04184	7.40912	6.59485	6.58625	8.15511	7.1247	5.75785	8.70644	9.3872	9.42374	2.59156	5.62749	5.28699	15.6125	7.60195	5.37886	6.73116	5.88908
Klhl41	11.1427	9.03122	9.57953	8.3498	9.84819	21.6506	6.3841	3.8223	6.79307	5.69343	5.12334	7.68916	5.84442	21.6209	7.86596	6.47218	7.07671	8.38959	7.51263	6.10037	7.48893	7.3327	10.0224	5.47577	8.03261	5.52482	6.37374	11.6275	5.07314	7.36253
Gamt	4.92457	5.62549	6.06226	6.75129	6.33734	13.291	10.2436	11.8861	8.48903	23.017	6.21429	5.77617	6.02276	8.20013	6.14811	7.24091	5.71504	7.71326	5.64426	18.8961	8.10433	6.78884	8.35971	9.52168	6.77856	10.118	7.00724	5.72505	6.15839	5.7049
Serpini1	6.77185	6.01485	5.27367	5.57875	6.32328	5.80859	17.5659	5.64363	6.07679	2.61046	6.09922	5.83462	5.74251	5.64253	6.66931	5.024	6.6692	6.03534	11.9426	5.82385	6.48063	6.9295	3.29975	6.40449	5.06373	4.45885	4.77492	6.24	4.3927	4.77454
Ptgs1	9.78559	6.4579	10.4129	9.43532	11.5544	9.61144	9.94855	7.87913	5.79952	7.40099	6.96461	7.55631	23.0822	8.76966	8.36589	9.47765	7.10156	5.52422	5.37008	5.72748	5.79895	8.19068	7.64639	7.71482	4.07093	23.1999	11.3555	9.32971	10.4994	13.2374
Aurkb	10.5799	18.2012	10.7938	9.32539	10.6544	16.4063	9.1844	9.30126	9.34856	6.27354	9.01303	9.43211	8.12206	7.86263	8.99347	8.7486	8.61232	8.76648	4.8648	7.86848	10.3908	9.07211	10.4997	8.48722	9.03016	5.70681	9.98941	6.19673	12.0756	13.1619
LOC100911599 /// Pex6	8.35134	8.37334	8.79095	5.0566	7.40607	11.3706	9.75993	6.98593	8.31804	23.017	7.07969	5.85588	5.85461	7.38803	5.84495	7.9154	6.58472	7.18665	8.51927	5.75681	6.11612	22.3497	6.0196	7.84355	5.69551	8.8917	4.88697	5.62552	7.85518	4.82649
Cyp2t1	5.22413	5.88506	4.74496	5.11156	5.54518	5.72798	8.82166	9.15655	8.52137	6.1098	7.44334	6.99304	8.53479	7.50404	6.18533	9.8645	7.97124	6.52065	7.05043	9.8335	6.98241	4.18677	7.87219	19.7146	7.52909	8.18106	11.7908	23.2897	8.74233	13.2374
Arg1	9.81736	7.32612	9.61986	5.71615	7.48575	6.0599	6.93545	8.46295	8.59069	19.4896	6.48588	6.77517	5.76799	7.06108	6.10556	6.26884	3.36939	5.64813	6.82717	7.20649	10.031	8.61264	6.88175	6.27576	5.23474	6.89844	7.06757	8.46857	5.93014	15.0604
Tdg	8.8733	7.24556	27.0046	5.51004	7.12482	21.3804	6.89676	7.73442	4.3069	6.90042	7.2408	6.91333	7.21508	6.51792	6.94055	6.93342	6.59963	8.58062	5.92628	5.91602	6.10665	6.17935	7.77468	7.5539	5.91402	7.17143	5.0809	4.21481	4.94394	10.3425
Lgals4	11.0338	10.8348	8.2936	10.9468	11.006	7.13627	6.7033	7.19052	6.28937	3.41045	6.96001	9.35771	5.49793	8.16849	19.2899	6.22916	5.79455	19.6032	7.81031	6.83359	6.91141	2.92558	7.17939	7.76539	5.74301	5.10883	7.47267	5.74669	5.03438	5.54433
Apobec1	12.5179	7.52303	12.3709	6.65052	4.84207	8.87174	6.42763	6.35719	8.66463	9.66995	6.45366	6.37663	8.42269	5.94839	5.94601	7.06236	20.5592	6.06632	5.55026	4.85181	7.58835	8.12973	4.19781	6.83207	5.90452	8.43239	20.009	8.19162	7.47189	10.5739
Fabp4	14.3652	8.19881	11.5465	4.14971	7.49044	6.78064	7.16276	7.56476	5.69324	6.04898	6.61017	6.00998	8.23926	21.7844	7.3022	5.68362	10.4262	7.39833	9.62776	6.34338	6.54217	7.44522	7.25124	10.5286	7.30583	5.52482	6.65386	7.88871	16.6836	11.2823
Got1	9.43611	5.80898	10.0097	12.2934	8.99978	5.76592	7.10956	5.63864	6.4927	16.7622	18.4173	9.11859	8.91185	9.73469	6.32361	9.01642	5.32741	6.23153	9.58859	7.11431	6.51376	6.26374	5.76301	5.816	5.99002	4.44585	6.35651	8.12671	7.44175	4.85011
Mapk6	5.7007	8.45838	6.11154	9.02767	18.2902	4.92663	7.40942	3.94705	7.7404	9.52024	5.26144	6.84425	6.33358	9.32864	8.43503	9.12553	11.5195	11.0071	13.4859	7.10593	7.41793	8.58451	3.92583	7.04816	6.65505	4.53685	4.96454	5.04133	6.17992	5.65767
Dbnl	24.2734	11.063	9.31966	9.27959	10.8794	9.11356	8.45893	6.89112	11.6268	11.1951	7.42953	6.47228	4.64191	6.89233	8.63713	9.59172	7.36495	7.15051	16.1847	6.73723	11.2003	10.8256	8.53419	9.99984	6.81656	10.118	7.1236	6.77659	10.831	11.7451
Msmo1	12.999	6.65929	10.9461	6.40319	6.63734	8.83854	8.17358	7.87913	6.67292	6.85364	19.7062	7.42878	5.2075	6.77104	8.04679	7.53352	9.5466	6.87688	6.63132	5.8825	6.40015	5.5089	7.41032	6.51024	7.12057	14.8628	10.2221	24.259	13.3934	13.1619
Lgals2	5.70524	10.6065	10.1575	9.82922	7.25607	9.2653	6.41795	11.2723	11.3125	9.29569	9.10509	5.20227	9.13605	9.58704	9.53595	9.89425	9.66587	9.20015	16.733	7.58357	10.76	11.6273	7.29229	9.03433	7.8046	9.41169	22.9825	9.29077	10.999	7.29641
Mllt3	5.75516	8.44943	10.2203	10.4979	8.38104	9.18943	8.73944	7.16557	6.46497	7.04545	21.1746	7.15777	7.38323	9.31809	6.55762	6.00598	9.01982	9.60802	6.97993	4.81829	7.03922	6.38564	9.83767	7.48493	7.93761	5.62448	22.9825	4.20183	8.7251	9.40269
Plvap	10.5436	12.3609	6.85981	10.4155	10.931	7.10308	6.44214	7.89909	7.62949	7.31679	8.17525	7.80606	8.24435	9.52903	7.52558	9.2148	7.39477	8.41024	17.7201	8.0235	9.09844	6.62944	10.1353	6.79069	9.46718	9.32502	8.96806	10.3683	21.7008	7.24918
Gc	4.67494	5.05712	5.4753	7.57115	5.11862	8.33592	8.19293	11.0627	12.9392	23.017	5.89207	6.7486	4.07632	7.3142	6.64272	5.12815	8.16008	7.99205	7.42645	6.07104	8.29369	8.39697	8.63682	4.91486	5.80001	10.469	8.32164	4.41387	7.00248	15.4523
Cyr61	7.72953	7.75575	4.84353	8.56507	8.14199	5.23485	6.77101	6.98593	8.68311	8.9916	5.85525	6.77517	8.42779	7.48822	6.02578	19.9075	9.18879	6.92851	7.00735	6.1297	6.78833	5.81365	8.97552	4.30338	8.59314	6.93744	9.14906	24.0599	9.6424	10.5644
Birc2	6.66746	6.34154	9.3331	6.15586	7.60294	10.5029	9.25211	22.8839	3.56752	5.39402	4.82874	7.43409	8.84561	9.27063	6.59485	6.13989	6.15733	5.67394	7.45779	5.97049	6.93034	7.87187	17.5046	5.11256	5.65275	4.52385	4.1759	6.48666	8.35905	8.82181
Dnase1l3	8.55559	8.86563	11.3628	4.89629	8.59666	9.2653	6.43246	7.44001	7.03799	3.18121	9.15112	8.46498	8.56027	6.33862	6.01514	7.60295	6.70399	8.04884	8.21375	7.49139	7.04395	8.12504	19.9627	9.17226	6.49354	13.6495	22.8533	4.88988	8.24708	7.08862
Slco2b1	7.23934	7.62149	10.5832	7.48871	8.67635	7.66734	5.55707	6.93603	10.3467	22.217	7.09811	8.40653	8.43288	8.17904	5.11101	7.87573	8.29923	7.98689	8.78562	6.16322	8.10433	5.62142	8.47261	8.40906	8.69764	14.7328	10.2221	24.259	13.6647	12.2551
Gpr83	4.92911	5.16453	7.08384	5.37721	7.97324	21.5795	5.27172	9.91503	7.05185	5.44548	6.13144	6.20128	7.11318	6.61284	7.19052	6.21924	5.90389	4.48133	5.63643	18.607	5.69954	5.55579	6.51226	4.29418	5.64325	4.8835	4.91283	6.41309	4.5219	9.70966
Msx1	7.57975	5.03922	7.14208	6.01387	6.29984	5.37236	16.3907	6.12267	6.24778	6.16594	17.2665	7.62008	5.90047	5.52125	7.32348	7.27562	5.90389	3.07704	6.11037	3.72475	5.12675	7.2905	7.28716	6.15162	6.47929	10.3867	4.80509	13.8734	4.48744	10.6589
Fmo3	12.8356	7.45143	13.1147	7.06275	24.9791	6.93238	7.24498	5.52886	14.9863	6.49341	7.82081	8.94854	7.37304	9.22844	7.61599	10.0877	8.04081	7.98689	6.45506	5.86155	4.01903	8.95021	9.61187	6.81368	10.0847	14.7328	14.6652	14.3234	12.9929	9.17128
Mgmt	9.99892	7.11578	9.7722	7.2597	6.5764	7.30223	7.77216	6.06778	6.77921	6.52148	6.97382	7.79012	6.7565	7.67279	8.25952	6.74991	5.5262	5.58618	19.2673	7.4076	5.85576	6.40439	6.62516	10.0734	6.91156	8.25906	5.59804	5.72938	23.0875	5.53488
Oxt	4.53877	5.3525	5.68589	5.04286	5.18425	20.6027	6.91611	4.15663	5.74869	5.11801	6.31556	7.26936	6.59344	6.35972	6.01514	7.21611	7.24071	7.07823	7.82598	13.6504	6.10665	5.64487	5.73222	6.49645	6.53154	2.95524	4.98178	5.36155	4.81474	5.65767
Trpv1	8.71898	15.5428	6.24596	5.5192	13.2419	7.47767	7.65608	6.27236	6.40951	6.41856	4.57556	6.11094	7.64819	8.07357	8.02019	5.54971	5.85916	8.10047	3.21578	8.47181	6.17766	6.61537	6.22488	7.84815	7.27258	10.3823	8.61468	5.46541	5.68897	4.69426
Ggcx	4.8928	12.9248	9.84389	25.2784	8.62947	9.63515	8.27998	6.96597	7.71268	6.14722	5.27064	6.51479	4.73362	6.3439	7.91382	6.37795	7.01708	7.37768	6.48248	15.5652	7.64042	5.81365	6.92793	4.59303	6.38429	6.87244	6.40822	10.2341	6.63642	9.24684
Entpd6	2.7278	5.27194	8.40113	8.34522	10.2419	5.66634	9.41171	6.37715	9.11288	9.61381	9.46874	6.88145	7.32209	7.54623	7.12138	5.26702	8.10542	17.9563	17.0385	10.0179	5.0226	6.65288	8.25707	7.99067	5.13973	10.274	11.8382	4.39656	7.44605	11.9387
Aqp7	10.2667	9.46533	10.0679	8.0246	9.63257	8.10832	8.50246	6.4021	17.7128	6.93317	7.21779	7.52974	7.60743	7.56205	7.82873	8.21793	9.44224	7.66163	4.67679	7.37408	9.88426	9.55501	6.07605	8.27573	7.14907	5.65048	21.694	6.91939	9.36678	11.3153
Homer1	7.74768	7.57674	4.67775	11.73	12.1919	5.8892	5.91013	5.82826	16.2017	6.17997	7.80239	6.93459	8.36155	8.38997	8.2808	22.0302	8.91049	8.84392	6.12604	5.71072	8.85228	9.17994	6.035	9.94007	8.20362	11.5003	10.7608	7.82813	11.9766	5.97408
Ncam1	9.59043	6.26994	6.53272	3.02297	5.08581	4.86025	5.76987	5.62866	21.7609	7.88285	5.84604	3.86318	5.55908	5.58453	8.14784	7.35002	9.17885	7.77005	7.33637	5.77357	6.02618	16.2548	9.78122	5.92634	9.26292	5.9148	7.15376	6.49531	4.9827	5.0154
Egr1	11.6283	8.93724	9.53921	5.57416	8.47948	7.12205	6.64527	6.97096	6.21081	6.39049	8.21208	6.11626	6.9705	7.27729	8.25952	6.20933	7.26556	6.63423	3.83073	8.09473	5.43445	17.9895	6.22488	6.69874	8.24162	4.59318	8.33457	11.9521	18.1952	5.27986
Sod3	6.66746	12.3519	5.82927	25.2784	8.48885	9.35539	9.0393	8.31824	10.4992	7.808	5.74477	6.18534	7.66348	6.36499	8.802	6.38787	7.2755	8.28117	9.92936	5.1032	9.15525	11.4351	6.64568	20.5422	6.05177	4.43285	4.4474	7.34347	6.86467	7.27752
Tfpi	10.4619	9.51903	11.5868	9.5544	9.22477	7.16946	7.45779	6.87615	7.5001	7.60216	7.6689	8.45967	8.64689	8.84876	8.47758	8.41135	8.82104	4.99761	6.44331	6.01658	7.7493	8.75329	7.91837	6.89644	19.8416	11.249	8.54142	12.7829	22.8248	10.9706
Brca2	10.3711	12.7592	19.0605	12.5819	8.85447	6.89444	6.80487	5.96798	4.34849	7.60216	8.83811	7.5138	8.0813	7.67807	8.76477	6.28372	7.52398	21.2812	7.37945	7.66737	6.27707	7.93751	6.60976	6.18381	6.80706	4.34619	9.61018	7.42569	9.14284	13.0155
Egf /// LOC100910178	8.49204	6.23414	11.9767	7.43833	7.33107	6.34441	6.39377	6.3522	6.12763	6.91913	7.12112	7.69979	7.24056	5.92202	6.64272	6.46722	23.8541	7.06791	8.19808	6.75399	5.17882	9.27371	7.19479	10.5286	6.83556	8.1724	8.99392	24.2373	5.49518	13.1335
Gys2	11.8326	9.03569	13.9616	25.2784	12.7872	8.07987	8.0962	7.68951	6.5805	7.53666	7.49398	8.51812	8.15264	8.00502	7.03096	7.55336	6.92265	7.53772	6.0477	9.57373	7.19544	10.9334	21.7948	6.99299	7.8711	14.0005	11.3685	5.53032	10.9387	9.82772
Slc22a6	8.76437	8.7269	5.72621	5.91768	7.21388	6.07413	6.47115	8.97692	9.64893	6.48873	6.62398	7.77418	6.61383	5.77964	8.26484	5.48523	11.3456	8.14178	9.19298	13.9144	9.32093	9.70973	6.87662	8.28032	6.19428	14.0742	10.9116	10.7794	11.0033	7.90562
Gbp2	9.81283	9.81888	13.2447	9.95746	7.27951	7.07937	7.17727	7.26536	3.44737	6.1519	7.85763	8.18866	8.8558	7.68334	8.20634	7.74678	7.61343	9.29309	4.64153	7.8182	6.65578	6.92481	7.23071	16.5882	6.80231	25.1065	14.6652	9.32971	12.0756	13.0485
Apoa1	6.8944	7.7647	5.00035	8.48262	5.13737	6.33966	7.50615	6.53683	8.91879	20.4814	7.2362	6.91333	8.36664	9.27063	6.25447	7.87573	18.9938	5.22994	5.06064	6.15065	9.20732	7.79217	8.1647	4.77234	7.36283	6.17479	6.08501	5.51301	3.41941	2.76272
Fdx1	10.2531	10.0247	12.6129	8.87653	7.5045	6.08835	8.05267	6.92605	7.0842	5.81039	8.1016	8.03456	8.38193	10.2937	7.8766	7.60791	9.06455	8.97815	7.9004	6.45232	7.70196	6.01994	22.0462	8.95158	9.09191	13.7405	8.41214	10.8399	24.7585	11.9434
Cd52	9.91268	6.94124	18.935	10.7224	7.39201	7.45871	8.88454	7.42504	6.2524	5.5718	5.03588	9.11859	8.40231	7.21928	6.93523	7.11692	8.2396	7.92494	7.12877	16.533	7.37532	5.98712	7.44111	9.19985	6.90206	6.76844	9.14475	6.5083	11.2703	9.45936
S100g	6.25897	5.70157	4.53885	6.76045	7.9498	7.25481	6.64043	7.6446	5.29582	18.6194	4.45128	6.97179	5.55908	8.96477	3.98882	7.09708	7.05683	8.22954	14.4691	6.59477	6.76466	5.89335	5.54235	7.05736	5.17773	7.51808	9.42056	7.68966	7.16182	9.19017
Ipmk	26.4157	11.6493	13.3432	10.53	8.79822	7.54406	6.89192	7.09072	5.63779	7.2279	7.26842	9.15578	21.9968	8.66946	7.65854	6.96317	4.8056	6.70651	8.49969	5.35459	8.69606	9.41436	8.55985	8.37228	7.62409	12.4796	7.352	14.2932	12.3469	10.8478
Erap1	7.08502	5.75975	5.46186	5.83982	6.52015	5.83704	5.82791	7.71446	6.41876	5.67004	5.16477	9.35771	3.22539	7.14018	6.65336	10.7671	11.4152	11.224	18.0804	7.3238	6.91614	6.05276	5.86052	9.73317	5.70501	6.17046	4.57238	4.8942	4.40131	20.9353
Plg	4.87464	8.42257	7.4378	12.5819	8.19824	10.9581	6.66461	8.87213	6.47883	23.017	7.98192	6.14282	8.17302	10.0933	9.07324	6.85406	4.90003	9.57704	7.42254	6.36014	5.33977	5.92617	6.8099	6.16542	7.44834	7.22343	9.99803	4.43551	5.42197	14.947
Asgr2	5.18782	7.32612	4.85249	5.90394	7.38732	10.0429	12.9181	11.8861	8.03153	23.2462	5.01286	6.58919	8.24945	7.34584	6.91928	6.30356	6.48036	6.56711	9.09897	8.59331	6.883	7.86718	6.66108	7.72401	6.27028	17.6794	7.50283	5.40483	5.5727	5.12874
Klf5	5.37391	6.27889	4.52989	5.4963	5.50768	15.4722	5.5087	17.874	5.72559	5.27239	7.47096	5.72834	6.58835	5.5898	5.95664	5.12319	8.11536	8.34829	7.50479	6.55706	5.66641	2.76617	6.4866	3.46661	6.53154	5.0135	7.55455	5.23173	6.70102	5.18069
Lsr	4.84741	8.59264	9.99175	6.71923	23.7135	11.2758	5.0299	7.78432	11.1323	10.2407	6.77588	5.9409	8.23926	7.77826	6.31298	10.0579	6.1623	7.06274	17.5086	8.52628	11.4843	10.4271	5.87591	7.9493	5.54825	4.32452	9.01978	10.8616	13.1436	7.57032
Pnoc	7.57521	5.23166	6.58649	4.28711	4.14834	6.48666	5.47485	6.34721	3.37343	5.81507	7.29604	5.86119	6.08391	6.44936	6.24916	7.22107	5.89395	16.2113	6.36889	4.90209	5.40131	5.44795	6.32238	7.27344	5.76676	4.44152	7.42957	8.07479	15.0385	6.79109
Sts	10.9793	10.7811	7.06143	11.556	6.88577	13.291	10.2194	25.4388	8.48903	10.9892	7.21779	8.42779	8.18321	6.33862	7.25434	9.82978	7.6184	10.5838	10.0782	8.55561	8.48304	9.02053	8.47774	9.54927	7.23933	12.6789	12.963	14.2932	21.3993	8.85014
Aldh1l1	6.56307	10.6737	6.81052	9.98037	6.87639	6.89444	6.61625	6.75639	5.9243	7.06884	19.8259	7.75824	8.33098	8.18959	7.28625	6.6904	8.14518	6.05083	8.28817	6.92996	6.87354	3.78825	8.20575	6.55162	6.97806	12.8176	10.2221	14.1677	23.7033	10.045
Vtn	6.8127	5.79555	7.37508	4.66728	5.99985	10.9581	6.66461	8.95197	6.47883	23.017	6.38001	6.79643	8.04054	7.97865	6.42998	5.24222	4.90003	7.47577	6.70183	6.56544	9.32093	7.18267	6.43015	8.40446	6.82606	5.51182	5.75749	4.39656	5.66314	14.8431
Npff	8.43758	5.34802	8.6162	7.81391	6.15922	6.72374	5.72634	7.56476	7.01488	6.6244	6.3662	8.94323	3.59735	9.60813	9.28598	6.33331	5.4765	7.59452	5.85577	6.44394	5.78949	5.46202	19.9576	16.7583	6.44604	4.82284	7.30891	2.62669	6.37372	5.51127
Grb2	12.999	11.7835	27.0046	11.1346	13.659	7.50138	6.85807	7.17555	6.22929	6.80686	7.69192	9.44273	7.48514	9.21262	6.60549	8.38656	7.35998	5.84432	16.733	6.46489	5.74215	5.9965	6.80477	6.86426	6.99232	9.22969	9.66189	6.56888	6.81299	7.5656
Bdh1	11.6283	13.3007	25.0376	9.71929	7.25138	9.31271	8.81683	9.02183	5.97051	5.70747	8.58954	10.1388	7.54119	9.1388	8.37121	11.8979	10.8834	5.06989	8.99713	17.614	6.2676	5.8324	5.67577	7.64585	5.78101	6.58645	5.87815	9.30807	5.34014	8.85014
Maf	5.31036	10.5528	7.78281	25.2784	7.83262	6.719	6.25835	5.86818	6.0121	5.83378	9.17414	6.4032	9.22267	24.2524	5.94069	9.6314	6.48533	10.5683	10.0782	8.7651	5.42971	5.09632	6.30185	10.0596	6.21328	7.39675	4.68873	5.74669	6.24452	5.85602
Apba3	7.57067	4.82441	6.57753	5.71157	5.32956	9.17046	11.1335	24.7651	8.03153	12.5751	5.68033	7.01961	8.44817	6.00113	7.85532	6.40771	8.38372	5.9166	4.54753	6.46489	8.59192	23.9063	6.95872	5.93554	6.36529	5.01783	7.77433	5.20144	8.10927	6.74387
Cd93	5.03804	5.37487	4.69567	7.14519	9.67007	5.47667	6.58723	6.91108	7.62487	9.15534	19.6464	9.09202	6.63421	8.65364	5.84495	5.11327	5.97843	6.02502	6.04379	5.53056	4.95633	6.2778	10.9102	6.20679	24.2973	6.72944	4.84387	7.20067	9.77591	4.62814
Sfrp4	7.09864	7.77813	9.93798	5.25813	10.8794	5.7754	5.6151	5.33425	6.41876	18.2873	6.84493	24.5022	5.93104	6.17515	4.73872	6.56641	8.26942	5.74106	6.65874	8.35031	5.65694	4.99317	5.79381	7.18149	5.629	5.23449	4.9473	10.7664	7.51065	8.23148
Cel	6.71738	6.58321	7.1376	5.39095	5.50299	5.53832	6.03104	6.08275	6.85314	7.39632	4.47429	7.15246	7.71443	7.37748	7.40326	8.20801	8.5179	4.05282	6.37672	6.02915	18.6703	7.23893	8.34944	6.46426	6.51729	8.37172	5.14123	13.7003	7.11875	5.06262
Ugt2b15	7.12133	10.3246	8.74166	9.85212	12.5622	8.72948	6.44697	5.88315	7.94373	6.87235	8.2489	9.71905	9.52839	8.85931	7.32348	8.94202	19.7144	8.22954	7.45387	7.93132	5.82736	5.81365	4.54678	8.38147	7.93286	8.25906	12.2002	7.11845	24.7585	5.25153
Cpq	10.716	5.41068	11.5107	5.32683	8.99978	6.003	6.76618	11.0677	9.84302	10.1284	9.72192	8.90603	7.33228	23.6195	7.67981	5.43564	7.35998	8.16243	8.70337	10.1896	4.0569	6.81228	8.2776	9.71019	9.94695	11.4873	21.694	11.4761	11.266	12.2551
Timm8a1	10.5799	7.63939	22.3493	7.03984	7.63106	7.62941	7.3272	9.75535	6.70065	16.416	7.13033	8.38527	8.85071	8.01029	7.84468	9.35366	8.24457	9.64416	9.8471	6.2554	5.87943	5.35418	9.44765	4.77693	8.9399	13.8229	7.55024	8.8364	11.0937	13.261
Dync1li2	13.3168	9.22366	11.9543	9.24753	11.095	6.63365	6.77101	9.0368	6.78845	6.55423	8.84731	9.13984	10.2978	8.0683	7.97233	11.4615	11.9668	11.9003	17.5752	5.32107	6.04511	5.57923	8.80104	7.72861	8.55514	5.77614	9.96356	12.2983	6.73547	22.7251
Rbl2	9.8219	6.65929	14.3379	7.23222	6.44515	6.30173	8.70075	6.13265	9.39939	9.71205	6.13604	6.54668	7.68386	6.51264	8.16379	6.67056	5.40693	6.03534	9.12247	5.85736	7.77296	19.9118	7.28716	8.84123	7.54809	10.222	7.15807	22.0867	4.81474	10.5314
Grk5	7.65237	9.25499	5.4977	9.52692	10.9732	6.29699	7.39491	8.49289	5.65165	6.8396	7.2408	9.03357	9.36534	7.33529	8.21166	6.47714	8.05075	8.42057	6.0712	16.533	6.2392	7.58119	6.99465	6.51484	7.08257	6.96344	5.05935	22.3636	9.36678	10.8809
Gstt2	9.51327	6.4221	8.21295	4.65811	6.25766	8.37386	5.70216	7.6446	6.5158	5.79168	17.5335	8.19929	8.29531	8.58509	8.55204	3.85851	5.39699	6.96981	6.34147	7.00537	7.64989	7.79217	6.12737	7.99527	7.8236	7.81274	13.3939	7.35212	5.32292	6.80998
Ptpro	5.63262	9.25499	7.60359	10.2827	5.46549	3.87398	6.46632	6.67655	7.13503	6.35774	7.04747	6.84957	9.56406	7.82045	8.4563	16.2077	8.6322	6.38125	7.63405	7.54586	6.57057	8.57513	5.69117	6.41829	6.34629	7.44442	8.73104	4.40089	2.65285	15.5704
Xpnpep2	11.5648	10.978	12.6577	20.3317	10.7435	8.19367	7.85438	6.87615	5.92892	6.25014	7.0935	7.6679	3.81136	7.64643	8.85519	8.76844	7.15126	7.37251	7.53221	15.0414	8.83335	10.0614	10.6793	7.26425	8.79265	12.9996	10.2781	8.62868	7.07569	11.2681
Taf9b	4.47523	5.11083	5.64108	6.05967	23.451	6.55304	6.07457	7.68951	5.7071	5.95074	6.67001	26.5959	6.33867	11.1321	9.04133	5.34141	5.76474	8.90587	4.3791	8.17852	6.40489	6.05276	7.79008	7.32862	6.28453	8.15073	10.3169	5.72072	4.5262	5.78518
Lgmn	12.5815	12.8532	7.37059	10.2506	12.4122	6.12155	6.96447	5.79333	7.13965	7.31211	5.68493	8.09833	7.1947	8.02084	8.30207	8.55518	8.66201	7.09372	8.07274	6.27216	7.42266	8.00315	25.1202	7.82516	9.62393	13.4979	11.4202	14.3234	22.6655	11.0036
Hpn	11.8644	10.9109	9.53921	11.6109	11.7231	9.7205	9.27629	9.94497	21.1001	5.94138	9.07747	7.80075	9.22777	6.81323	6.02578	8.65437	6.87793	6.52065	10.2114	10.1854	7.47473	23.9063	7.15373	11.5033	5.32024	7.59175	8.21821	10.7794	6.66226	6.21494
Sacm1l	10.4074	9.85468	4.94659	8.83072	24.3556	7.17895	7.3804	7.25538	5.14794	6.37646	5.75398	6.05249	7.36795	7.85736	7.54153	9.74547	9.95908	6.35027	19.2673	5.3504	7.53627	9.31122	6.35317	6.44127	5.19198	6.0188	4.8568	6.27029	4.43146	7.05083
Nat1	8.35134	8.98647	5.67693	8.59713	23.2729	5.8323	6.57756	6.87116	6.9964	7.0548	6.52731	6.62639	5.71194	20.5082	7.95637	8.94202	9.14903	7.73391	7.18752	7.79306	9.19312	9.61596	4.89061	6.67116	7.25358	7.83007	4.65857	8.34308	8.4624	8.22204
Cyp8b1	11.6283	11.2689	8.70581	9.65059	13.659	7.46819	7.34171	6.33723	6.81155	6.98931	18.2378	7.77949	8.43798	7.56732	7.66918	9.9736	11.0971	10.4083	9.41233	6.0082	7.81084	7.9	4.37743	9.27801	7.12057	25.0762	12.6958	9.56771	14.0696	11.065
F2	8.57828	6.4042	10.0231	5.21691	5.95298	11.0434	8.9329	6.80629	6.47883	23.017	7.88525	5.75491	8.62141	8.21595	6.24916	7.40457	18.5416	8.30182	4.92747	5.61017	4.82852	8.24694	9.05763	5.11256	5.41999	5.45549	5.84368	5.36588	5.56408	3.07441
Sgta	6.51314	6.40867	7.91275	3.69626	5.65767	6.10732	5.76987	8.55776	6.0121	6.64312	8.61255	9.42148	7.7552	5.10992	8.7435	8.5403	7.7327	6.23669	18.006	5.46771	6.09719	7.71715	5.38839	9.20904	6.10878	5.46849	7.77002	4.61725	8.97919	19.3107
Spink3	7.68414	10.1545	10.4891	7.46123	9.18727	8.13203	9.83248	7.73941	8.21176	9.62784	8.59414	7.4766	8.50931	8.3847	8.55735	21.817	9.56151	9.44281	9.44758	7.54167	11.0488	6.29656	7.43598	9.83432	8.40313	9.14303	12.0321	23.9388	6.46416	13.1335
Abcc6	9.28633	7.02627	13.6793	7.06275	5.7608	9.0377	7.63674	17.9439	7.84669	9.26294	7.42953	8.04519	7.29661	6.29644	7.91382	6.4573	4.79069	7.69777	9.40841	7.85172	7.43213	8.81893	6.75345	8.17918	7.88061	13.6755	13.6827	24.4061	8.63036	10.1866
Fads2	8.74168	5.59416	8.69685	9.5544	9.17321	7.27852	6.33573	19.0816	5.92892	6.40453	4.82874	8.9326	8.45327	7.8099	7.79682	7.78645	8.33899	8.27085	7.52829	5.78614	8.1422	8.53294	8.488	7.37919	8.11337	12.6832	13.7516	12.9906	21.8687	9.8655
Cyp7a1	9.40888	5.85821	8.24879	5.75737	4.7577	6.75693	6.11326	5.85321	6.94557	7.20919	7.58604	7.84857	7.58705	6.03277	22.3959	8.02947	3.73714	7.65647	6.01637	5.56408	5.34451	5.92148	7.164	5.14474	7.33908	11.6476	10.2221	23.1815	14.0696	10.0402
Gdf10	5.73701	6.4042	4.01014	7.92383	23.8353	6.75693	6.42279	5.31928	6.66368	16.1634	6.55033	5.95153	6.29282	8.00502	7.77023	6.55153	10.297	5.90627	7.90432	5.69396	5.92203	6.20279	8.21602	6.65736	7.6906	4.54552	5.47737	6.36982	6.58474	7.47587
Slc2a5	12.1004	6.94571	12.828	9.90708	8.88259	7.74321	7.09989	8.01386	6.83466	7.36357	8.33636	7.48723	8.02016	8.29505	7.83937	7.46409	4.54718	6.722	5.1899	9.03325	8.44517	20.2071	7.11268	6.53782	6.91156	8.88737	9.41194	23.757	12.7474	8.36372
Slc22a8	14.1973	17.9058	13.6748	4.95583	6.18266	8.78639	24.6852	11.9809	12.9392	10.3623	7.45715	10.107	7.24566	9.46047	8.91369	7.89556	7.53391	9.72676	8.51927	7.3657	9.43928	6.00588	10.6023	9.61364	9.99445	12.3799	8.01135	14.3234	9.77591	9.03905
Clec10a	8.83699	5.01237	8.26224	8.60629	10.5326	7.81908	10.5241	7.38013	6.50194	6.93785	6.00255	8.72536	6.58835	7.0558	6.61613	19.3223	7.38483	7.01112	8.00616	4.88952	8.59192	9.6019	6.70213	5.67347	7.78085	11.9943	23.435	11.6059	7.19197	8.65652
Celsr3	4.88372	3.26699	7.88138	7.3742	5.31549	7.68631	18.4317	5.53884	7.31988	5.64197	7.33287	7.38627	5.43169	6.65503	6.87673	6.83918	5.29759	6.46386	4.45744	6.38528	7.28065	2.98184	6.3737	9.23203	7.62884	8.88737	7.55024	3.98547	16.3348	5.07207
LOC100912479 /// Vcam1	20.5334	12.5846	7.44677	6.38029	10.2279	7.35439	6.36475	7.80927	14.9863	6.50277	8.17065	9.26206	9.38572	6.61811	6.93523	8.45599	8.25948	8.1934	8.03749	5.99563	8.18008	8.70172	10.5561	4.52866	10.6547	12.4709	8.6233	11.1169	11.2918	4.869
Nr3c2	8.15164	8.53893	5.1975	6.307	7.83262	9.43126	6.80003	24.9597	7.45851	7.29807	6.99684	6.46166	21.5281	6.77104	7.95637	10.782	10.5654	5.56036	8.19025	6.58639	6.72679	6.03401	6.49173	5.11716	7.45309	6.74244	5.99882	7.89304	5.80956	8.01897
Atp2a3	4.76571	5.39277	5.20198	5.60623	5.31549	5.61892	15.7668	5.7584	5.03242	6.49809	4.96223	6.06312	5.39093	3.27478	6.01514	6.44242	5.49141	6.57228	4.6572	5.17023	7.7493	7.98439	6.27106	5.8068	16.773	4.72318	4.47326	4.52638	5.21525	3.05552
Drd1	5.06073	7.32164	4.82561	5.52378	9.22477	5.91291	5.99718	5.89313	4.70432	17.1318	3.87128	7.12058	7.40871	7.01362	3.54207	5.10831	7.31525	7.20214	6.40022	15.9171	6.88774	5.80896	8.11851	7.30563	5.5815	6.35679	8.08461	6.27029	6.48138	5.18069
Bcl2a1	9.56773	4.56931	13.3612	5.01079	5.24518	7.24533	17.5708	6.97096	5.18029	7.1624	7.42493	7.60945	7.43928	6.43354	8.00424	5.82744	3.88623	7.28991	6.31014	6.51098	6.31021	7.14047	7.73876	6.11944	5.86651	25.1065	14.2989	9.56771	13.1436	10.7581
Abcb9	8.1471	5.59864	13.3432	4.90087	5.79829	5.84653	6.58239	6.01289	17.2091	6.5168	6.03017	7.64665	8.37683	5.98531	7.86064	7.04748	7.52894	6.14892	4.40652	6.90482	5.32557	6.54973	6.67134	6.34013	5.79051	13.6495	13.4068	10.827	22.3597	9.97884
Serpinb2	5.3376	7.11578	5.30504	6.92076	5.86861	5.59996	7.66575	18.8271	5.09711	6.39049	6.41223	6.75923	7.23547	8.26869	7.14265	7.23099	5.5411	8.08498	5.87928	3.15493	8.73393	8.46261	8.3905	5.49416	8.63589	14.0742	7.89069	10.814	7.15751	10.3944
Cd14	11.4196	6.13568	9.11355	5.15278	5.99985	11.7215	24.6852	9.64557	6.09528	7.63958	7.58144	5.49985	7.20489	8.84349	8.86582	7.76662	6.83817	8.49801	7.63013	7.24838	15.4702	7.30457	6.92793	7.42057	6.37004	9.19069	4.15435	5.53032	7.0843	10.692
Dnase2b	6.90801	7.86763	9.65122	10.5987	8.21698	5.83704	15.5443	7.18553	6.38179	6.60101	5.25683	8.94323	8.9628	9.36028	7.06288	6.33827	8.2396	7.78038	5.91845	8.60588	9.25939	19.668	10.433	7.56309	9.9992	4.9875	6.23153	10.5327	5.00854	10.7439
Hpgds	22.8391	6.09093	11.9767	10.9193	9.1779	5.89394	7.10473	6.67655	5.73945	16.9306	7.40652	8.55532	4.37185	7.29838	7.83937	6.61105	10.0137	8.45671	5.85969	6.38109	5.567	6.71852	7.04597	7.04816	6.82131	7.99907	13.2819	14.3234	10.9215	11.8632
S100a8	11.3469	10.6602	9.70947	5.86272	9.1404	9.18469	17.5708	5.46399	7.21821	7.51795	7.57223	8.56595	9.3042	7.27729	8.11592	8.5403	4.04029	7.43447	8.108	5.04035	5.83682	7.88593	6.59437	7.11253	7.02082	5.53782	7.93809	8.29115	21.1969	8.60457
Slc21a4	4.37992	6.49371	8.15918	6.05051	7.62169	16.321	6.45664	5.97297	5.71172	6.71797	6.98303	7.80075	3.56168	5.28922	6.92991	6.10022	7.21586	6.88205	5.59334	7.93132	7.66409	9.45656	9.23211	6.44587	7.79985	6.07513	7.64074	4.27107	20.0901	5.94102
LOC100912724 /// LOC691603 /// Mcpt10 /// Mcpt8 /// Mcpt8l2 /// Mcpt9 /// RGD1565970	24.2734	8.97304	9.86629	8.00628	5.50768	9.33168	5.25237	5.89313	9.22841	9.53428	4.22572	8.86352	7.54628	9.24426	7.2437	8.31216	6.77854	8.10564	8.29209	5.9244	8.27002	4.83846	9.83253	17.733	8.7974	6.35246	11.2392	13.6094	6.71394	8.32594
Gch1	9.83552	7.69757	20.2434	5.34515	7.9123	11.5793	9.67288	6.49691	9.37166	10.7413	7.86684	8.90072	7.1998	8.7222	6.85014	7.78149	8.04578	7.53256	15.7068	4.93979	6.64631	5.73863	6.53278	6.24817	5.84751	12.8306	9.16199	14.3494	10.7449	6.26688
Lamp1	13.7616	7.35744	12.595	6.70091	7.58888	6.99876	6.35024	6.7514	6.3402	6.5823	8.87954	8.94854	7.26094	9.33919	7.05224	7.474	6.75369	8.27085	6.41198	6.14646	19.7259	7.71246	9.74016	3.86201	8.58839	10.287	7.84759	24.0599	6.96803	13.5444
LOC100361067 /// Psma3 /// Psma3l	14.5558	4.91391	10.9954	7.75436	6.06548	7.04144	6.66945	7.15559	7.05185	7.32614	8.04176	7.03024	4.13746	8.01556	22.2257	6.61601	6.84314	7.22796	4.56711	5.89926	10.0026	9.89727	8.17496	6.80908	7.62884	14.0742	10.2221	14.3494	23.7033	10.3425
Psma3	9.56319	5.41068	4.71808	6.15586	5.4233	6.10258	6.92578	6.62166	8.40122	19.5691	6.17287	6.38195	5.64061	6.18042	7.20115	6.36307	6.02316	6.22637	6.54515	6.68695	7.65462	6.03401	7.5848	6.76771	6.89256	9.03903	24.7796	7.45165	13.9016	5.5396
Bbs2	12.8356	9.46533	12.7384	9.50402	9.57164	5.96981	6.44697	9.5308	9.80605	9.86643	7.63668	9.60215	4.73362	8.49544	10.0199	7.35002	8.47317	8.89038	7.6458	7.18973	7.44633	20.0758	6.96899	9.38375	7.41033	23.4296	13.1784	11.766	12.278	7.89618
Enpep /// LOC100910501	10.0125	11.0406	9.84837	19.6584	11.0247	7.08885	7.5787	8.19848	6.428	7.14837	8.59414	9.13984	8.54498	4.64586	8.58395	7.88069	7.66809	6.99047	16.1964	8.30003	6.81673	8.4673	7.3898	7.88953	5.40099	7.92107	11.3555	11.7011	5.91292	9.40741
Maob	9.83098	9.24156	11.905	6.76045	8.6951	11.6599	10.9932	8.76734	5.87346	6.59166	8.57573	8.15678	7.57686	9.01223	9.31257	8.03939	9.2534	5.49325	8.19808	7.9397	15.8868	9.21276	6.8253	8.09182	7.7476	11.7559	10.8556	21.1173	10.9387	7.4617
Epb41l3	10.1124	9.66672	4.54333	8.96355	7.81387	6.6052	7.09989	7.91905	9.13598	6.57294	18.7396	8.36933	8.05073	7.49877	8.00424	10.043	9.2037	5.76688	5.75394	6.69952	7.73983	4.34617	7.70284	7.08954	6.28453	3.89987	20.5304	10.4721	6.54598	9.52547
Ptpra	7.0124	7.02627	5.13477	6.94824	5.27331	8.10358	7.10956	6.94102	7.06109	5.787	7.21779	7.17371	7.68386	7.31947	3.94628	9.06105	6.49527	6.91302	16.5176	5.3881	21.8987	5.71519	4.06952	6.50564	6.05652	6.17913	8.67071	5.21443	6.44262	7.69311
Cd53	7.07595	9.03569	10.5697	10.2231	11.92	11.7594	6.10358	9.77032	9.61196	11.1576	8.78747	7.98673	8.61122	8.4849	8.41908	19.114	7.67306	8.10047	7.18752	8.02769	6.04985	6.94825	10.0173	9.301	6.14203	21.5143	12.0924	8.90131	12.2091	13.1335
Apoa4	11.6283	10.0247	12.483	23.286	6.98889	7.10782	6.49534	8.86215	20.2313	8.78576	7.94049	8.06644	8.0813	5.94312	8.43503	7.26074	8.95522	9.47378	8.7112	7.04727	4.01903	6.50754	9.81201	7.43436	8.31763	11.6606	11.8296	12.4367	6.63642	12.5857
Napsa	10.0988	8.92829	8.49523	10.4155	7.55138	9.12779	6.91127	7.48492	5.91043	7.77058	19.7937	7.57225	7.73991	8.84876	8.52013	6.91854	8.68189	7.98689	8.59369	10.6505	8.91382	5.46671	7.44111	11.2642	9.68094	8.30239	9.14906	12.8478	23.1822	12.1937
Cadps	2.80042	22.4841	5.57387	6.19708	4.60301	10.9154	9.2376	21.0426	10.8874	10.5448	5.43175	6.54136	7.61252	5.56871	8.08401	7.16155	7.15126	8.32247	5.63643	7.44949	8.22741	5.41513	7.97482	7.68723	7.42934	4.59318	9.16199	7.69831	7.4762	5.72851
Mrs2	4.52516	7.13815	6.59097	7.41543	5.22175	8.04668	6.19064	8.05378	9.57961	6.07705	5.83683	7.46066	7.82653	9.02278	6.7225	4.33958	5.28269	7.37768	17.0072	15.9255	5.44865	5.89804	6.55331	6.02289	6.52679	4.09486	5.39118	7.57282	6.2273	5.75684
Ptgs2	11.1336	4.74833	6.61785	7.53909	6.74046	7.04618	6.49534	5.16959	6.98254	5.79168	6.35239	5.7124	4.56038	6.02222	8.52544	7.72694	8.84589	9.22081	6.32189	6.83778	8.1422	6.21685	7.40006	18.3721	7.94236	5.94947	5.39118	6.478	23.0875	9.61993
Cd99l2	9.91268	8.18091	7.71112	10.6491	9.32789	8.87648	6.06006	7.70947	8.69236	11.0173	8.58493	9.83064	9.14114	8.95423	9.26471	11.0449	10.0436	10.2224	15.3621	5.34202	9.48662	7.20142	8.49827	7.98608	9.27717	11.4873	7.08912	24.259	8.4624	7.13112
Pnliprp1	9.83098	7.46038	7.47813	10.9468	9.28571	6.57201	6.86291	5.77337	8.77554	7.4852	8.01414	4.45302	5.62022	7.29311	8.87114	7.34506	8.10045	7.28991	6.22788	6.85873	18.088	6.70914	6.99465	7.99527	6.03752	6.59078	2.89598	13.7003	9.97401	5.83713
Heph	9.55412	4.00095	6.84188	10.8094	11.081	7.43026	8.43475	7.91406	6.11376	6.88171	7.87144	25.1133	4.89668	8.0472	17.2955	6.38787	6.23685	6.78912	5.81269	8.22042	6.24393	9.36748	7.0357	7.99987	6.35104	8.71838	4.51635	8.74552	11.1196	11.7356
Enpp2	13.1125	18.5861	11.905	9.59104	9.60914	10.1852	9.2376	7.56975	6.19232	6.61973	7.5216	8.87415	7.94373	9.78215	9.3498	9.32887	9.05461	10.558	5.6521	6.28892	9.84639	9.95353	6.90741	20.9606	7.42458	9.69768	6.05053	10.5414	11.0894	7.61282
Exoc7 /// LOC100911734	10.9384	11.0048	25.9875	9.85212	11.0388	6.80909	6.7952	6.00291	4.25607	6.51213	8.42843	22.8124	8.34117	8.49544	5.77582	6.53665	8.05075	6.7633	4.61412	6.98443	5.16462	5.75739	7.01517	6.27576	5.19198	7.81274	7.47698	7.60744	7.77766	5.29403
Nox4	8.25603	18.5055	12.1917	8.3727	9.23415	8.71052	8.17358	8.438	9.69514	7.54602	6.08541	9.15578	6.58835	9.22844	8.49353	11.0449	9.46212	8.7768	5.67168	7.2819	8.57298	6.01994	11.3156	19.7146	9.96595	9.27736	12.6742	12.2939	7.87671	12.6282
Nol3	9.88091	9.39372	12.7652	6.9345	5.93423	7.80011	7.82052	21.347	4.32538	6.13319	6.98763	8.40653	7.62272	6.60757	8.50949	9.3735	9.23352	6.78912	4.7042	15.6699	9.96947	9.01116	3.95662	7.99527	7.7571	12.5966	5.11537	12.4367	9.37109	10.7108
Foxq1	5.63262	2.92687	3.90709	6.04135	5.75142	7.18843	6.46632	5.53385	7.5879	5.45484	5.45937	6.11094	7.21508	7.95756	6.57358	15.1117	5.18826	6.45353	5.93411	6.31405	5.89363	6.04338	9.33475	5.28727	8.17987	19.3	4.58961	4.74707	4.65109	5.07207
Grpel1	7.52982	6.71747	11.4121	5.01995	7.51388	6.85177	9.23276	8.83221	5.18954	7.85946	5.58366	9.24612	7.7501	8.53236	6.58422	6.99789	4.87021	7.81652	6.96034	6.73304	9.54342	7.98439	6.44041	18.7537	6.36529	9.39435	7.71831	6.18375	22.8248	10.3661
Acvrl1	5.09704	4.22471	4.85249	4.96041	5.45143	5.93662	7.30302	7.13064	5.54536	14.8254	7.77938	5.95684	21.0236	6.5812	6.07897	5.10335	6.06291	7.44996	6.10646	8.59331	5.69481	5.66831	7.11268	9.45732	5.34874	8.81371	4.42585	11.2943	13.0532	10.1725
Pnlip	7.18034	10.3022	7.14656	8.20323	8.87322	6.74271	7.96078	5.958	7.02413	7.49456	6.75747	4.45302	5.81385	7.27201	8.87114	24.2818	8.10045	7.28991	5.01756	6.4188	4.12317	5.52297	7.38466	6.01369	6.63605	5.68081	4.43447	13.7003	5.31861	4.84066
Cd37	6.19542	5.18243	5.68589	2.86724	8.35761	6.86125	7.12891	5.91309	5.38824	6.59166	7.26842	6.78049	5.17692	5.90093	5.6269	6.08038	8.81607	5.84948	17.2344	14.9618	8.56352	7.20142	6.25054	6.54702	5.25374	6.21379	7.60195	4.33598	4.48744	5.79462
Vegp2	5.23774	4.71252	8.10989	6.29326	5.65767	20.8019	5.79889	6.42206	6.0121	6.34371	16.7003	7.17903	7.02655	6.57065	7.21179	5.66874	5.58583	2.71565	4.9353	6.01658	5.54333	5.06819	6.81503	6.36771	5.13498	6.07513	4.74906	5.88083	4.48314	7.18779
Aif1	6.8127	11.6448	10.2203	9.46738	10.4435	10.0998	11.6897	10.3242	8.7894	12.5751	8.387	8.71473	8.62141	7.67279	8.23293	11.1639	10.5057	8.07982	10.1722	6.3769	8.77181	8.96896	8.24681	11.232	21.3807	12.6399	13.6697	23.1815	9.75007	11.2209
Aspa	5.95941	5.45095	4.55678	7.6765	5.62955	6.46295	6.29221	5.61369	6.17384	5.49227	5.74017	10.3567	6.95522	6.22788	9.28598	7.99971	6.78847	23.0365	9.17339	5.22051	6.74572	6.20748	7.07162	9.21364	6.94481	7.27109	4.72752	21.4116	8.17817	4.45341
Slc1a3	20.4608	9.24156	8.90744	5.36805	5.02019	6.20215	7.51099	4.43606	7.01026	6.97527	7.09811	8.90603	7.57176	9.27063	6.82886	8.53534	8.11536	7.31056	7.09743	5.71491	7.18124	6.45128	8.88315	15.0296	7.03982	8.61871	11.5107	12.4367	7.61401	12.1701
Ndufv3	5.79147	12.3743	10.2203	10.2827	8.16542	24.6521	12.9181	9.68549	8.31804	11.4196	7.82541	9.75094	5.71704	9.27063	9.26471	6.46226	6.67417	6.83558	19.2673	7.9397	9.29726	10.1176	6.88175	4.51027	6.7358	7.89507	7.21841	5.53897	4.29365	7.32947
Akr1b7	10.7251	5.59416	13.3925	9.56814	6.51546	7.85227	7.46746	6.76138	7.52321	9.4641	8.04176	8.85289	7.04184	8.41634	7.76491	8.45103	6.76363	19.6032	7.0896	5.6772	6.5469	4.13988	6.58923	6.84586	7.99461	10.4257	11.627	21.7318	11.0248	11.8679
Lrat	11.3696	12.2579	13.3432	12.8247	12.5856	9.07089	10.2436	8.45796	12.9392	11.4103	9.41811	7.81138	8.03035	7.83627	8.6584	19.6298	8.7465	8.73034	7.30895	8.23718	4.89006	6.1184	9.59134	7.66424	9.48618	10.1093	10.9375	8.39934	5.58131	22.7251
Kpnb1	6.21358	8.46733	9.53473	6.15586	10.3263	5.4909	6.20515	6.60669	8.35501	7.78461	19.4254	9.14516	7.90806	4.62477	8.31803	6.63088	6.32133	7.34154	6.7645	6.4607	6.19186	5.68237	7.09728	4.62521	5.33924	7.46175	6.87365	8.77149	21.3993	5.36959
Sdc3	6.93524	21.3652	6.83292	11.7346	8.97634	6.77116	5.77471	6.79631	6.4927	6.07705	4.13826	7.83263	6.54759	5.67945	6.38212	6.98797	7.12641	7.03693	5.33483	16.7844	6.03565	5.76208	3.59226	5.89416	5.82851	4.50652	4.78785	4.79468	4.68124	7.37669
Hrg /// LOC681544	6.85809	4.7349	7.37059	5.01079	4.88425	8.71052	6.10358	6.45699	8.95576	4.39756	6.26493	5.89839	6.88898	7.38276	6.19597	5.48523	15.4952	7.09372	5.35441	6.28054	5.71374	4.88534	8.07746	5.33325	8.06111	5.20416	4.36121	3.16327	13.6863	6.13465
Cartpt	5.58723	7.74232	5.10789	6.22914	8.36698	7.43026	7.42393	5.41908	7.16276	7.34953	17.2159	8.66691	6.72593	8.21595	6.20661	5.391	17.4433	6.15409	4.43394	5.55151	6.13979	5.68237	6.45068	3.25972	4.72646	2.70824	4.9473	4.70813	4.95686	5.94575
Zg16	4.98357	7.97057	4.58366	8.13911	5.75142	5.79437	5.53289	6.1576	5.17567	6.29225	3.39715	7.15246	6.55268	6.10659	7.17456	5.96135	6.18218	4.05282	4.65328	4.856	6.47589	5.1057	20.6452	4.8367	5.80476	6.58645	4.70597	13.7003	6.08949	5.00123
Apoc1 /// LOC100911905	8.71444	6.86963	8.38321	7.01694	5.7608	8.33592	8.35737	11.2623	12.9392	23.017	8.3962	5.82399	7.83672	8.43216	6.59485	5.60922	4.95469	8.60643	6.83892	7.27352	5.57173	5.9965	6.64568	7.45275	7.7761	5.06983	6.72281	4.40954	4.87073	14.8431
Mmp16	20.2565	10.5305	9.99623	8.56965	8.99509	6.13103	6.18097	7.43502	21.6269	9.12259	5.52842	6.43509	8.24435	3.24314	7.35007	9.14536	8.23463	4.56394	7.58313	8.67711	4.93739	7.06077	8.44182	9.1033	8.08486	9.86234	5.73594	7.9969	8.76386	11.0981
Usf2	9.9036	5.62102	13.3208	7.24138	6.93264	7.03669	7.27884	6.51687	6.76072	20.7153	7.92668	9.91035	7.7552	7.3933	7.75427	6.04566	7.95633	8.34829	5.18598	6.26797	6.5469	6.16059	6.8099	6.35392	6.08027	24.8725	8.98099	10.6322	14.0265	4.44396
Sik1	5.00627	5.80003	6.76571	5.4047	6.26235	7.10782	17.0001	7.54979	6.78845	6.80686	6.5089	5.91433	5.78328	6.17515	19.258	4.38422	6.30642	8.23987	5.55026	3.83368	5.71374	4.81501	5.73736	6.52863	7.63834	4.66685	7.3046	6.07556	8.94043	5.72379
Sstr3	4.97449	7.50066	6.03537	6.29784	8.86384	8.56827	6.19548	5.68854	7.30139	7.56473	3.00588	9.51713	7.95392	9.78215	6.94587	5.86712	5.9834	5.89078	6.99559	6.11294	6.60844	5.9543	7.17939	14.5929	5.99477	5.74148	4.58099	7.78486	2.58394	14.999
Slc26a1	8.47843	10.6155	10.9596	9.68265	11.7138	6.85651	9.17472	22.8839	11.1739	9.82433	7.40652	8.31619	7.60233	5.88511	7.89255	7.04748	5.94861	5.30738	8.88746	5.29593	7.47473	23.9063	7.8106	7.45275	8.40788	6.11413	6.50303	5.34425	6.19284	5.22791
Add2	11.9778	8.24804	22.3493	5.96349	11.3716	4.52359	8.69592	7.59969	9.0297	6.38581	7.71493	7.8592	7.13356	7.35111	6.75973	7.76662	8.77631	6.81493	13.9246	5.87412	7.29958	6.7654	9.08842	5.8114	8.73089	11.4526	4.51204	8.65898	4.55635	9.04377
Mefv	4.8701	6.95466	6.62681	5.65661	4.85613	6.47243	6.84356	8.77233	17.6065	5.95541	7.01525	21.569	5.80366	7.4935	6.27575	4.76114	6.7835	5.18864	6.64699	6.10875	6.41435	6.45596	6.4866	5.14934	6.73105	7.84741	11.0883	5.61254	9.00934	4.83122
Sh2b2	4.68401	4.82441	8.28912	9.15592	8.42323	7.27852	20.197	6.66657	6.53891	3.82681	6.70684	8.37996	6.51701	5.80601	7.94042	21.1474	5.76474	5.56036	4.55536	8.81956	9.53869	7.03264	9.3912	7.67804	7.51959	4.9485	6.02468	7.47762	4.8535	8.12759
Cyp4a8	8.8733	10.3738	12.1962	10.4109	7.07795	7.12679	8.46377	6.62665	8.38274	5.86653	3.81604	8.81038	7.8622	10.0669	8.66904	7.84101	6.4903	9.21048	8.85613	5.96211	17.6856	5.19009	7.54375	6.5838	6.65505	10.3867	7.1236	10.8962	9.19021	24.4394
Milr1	5.50099	5.06608	4.94659	7.13145	6.87171	7.54406	7.13375	6.80629	4.87992	7.21854	6.72064	6.79112	6.60364	6.80268	21.6407	5.48523	5.78461	5.9992	6.54123	5.63949	3.28528	4.29929	5.94263	17.7744	6.34154	9.38136	12.3898	12.1684	9.23759	6.07326
Stag3	4.68855	5.4599	7.89931	5.71615	6.67015	6.94186	6.80487	17.9538	6.15535	4.00458	19.2551	5.76554	5.76799	5.56343	7.82341	7.53352	5.26281	3.38165	6.40806	6.56963	5.64274	5.62611	8.51879	7.63206	9.50043	4.45452	6.91674	6.58186	5.40474	7.08862
Mlxipl	6.91255	7.39325	7.60359	10.7453	6.28578	8.78639	12.9181	24.9597	11.1323	10.25	7.15334	7.94954	7.11318	3.5279	6.9246	5.58443	8.12033	7.80619	5.22515	5.73586	6.08298	9.01585	10.0224	6.80449	9.34842	20.626	6.41684	8.0921	8.1351	8.30232
Fancc	7.41635	5.92086	6.70298	2.80311	4.41083	6.09309	5.89078	6.81128	4.95848	6.43727	7.07969	8.279	6.80745	21.9268	7.12138	8.60974	8.58747	7.34154	4.91572	6.34338	5.98831	7.79685	5.55261	14.294	6.51729	11.6866	7.9424	8.64167	6.58905	7.14056
Grb14	6.11827	7.0397	6.09362	4.81842	4.97331	6.96557	8.26064	5.86319	5.52688	17.6651	3.09794	6.74329	7.89787	6.37554	6.86078	7.44425	8.19984	7.27442	6.08687	6.35176	8.29369	9.17056	5.65525	7.17689	6.27028	19.924	5.57218	8.90996	4.37117	8.70847
Aqp9	11.4377	4.83783	11.784	6.70091	7.37326	24.9698	12.9181	8.48291	10.892	9.27697	8.79208	7.7423	7.82144	8.44798	7.52026	8.84779	6.65926	8.14178	7.81031	6.61153	5.67587	6.24499	7.33848	8.37228	7.56709	11.4873	24.4392	11.9997	9.75007	8.8832
Rgn	13.3168	5.44648	8.48627	8.90859	8.32011	8.04668	6.64527	7.06577	7.20435	9.07581	8.50208	8.57126	22.5115	8.1263	6.94055	9.00154	9.19376	10.3773	4.26551	9.26788	9.38247	10.0332	4.72639	7.1677	8.57889	21.7179	12.2864	10.4894	8.41503	4.72732
Klk1c2	6.47229	7.58121	4.49405	7.79101	8.07168	6.45346	5.38779	6.82126	5.70248	2.81631	5.90588	7.89109	6.93484	7.99447	9.64231	7.6823	7.22083	7.94559	5.421	7.10174	16.3033	6.41377	6.38396	6.75851	8.72139	4.58885	4.34828	11.7011	21.7008	7.24918
Reg1a	7.27565	11.797	9.40479	8.52843	9.14977	4.54256	6.83872	5.3592	8.7247	6.50277	8.54811	6.37132	7.14884	6.51792	8.62649	7.25579	19.8933	8.52382	7.31286	5.53894	6.05458	5.67769	7.83626	6.60679	5.82851	4.27252	5.02487	22.0434	5.40905	7.15473
Fabp9	16.9614	4.7349	4.61054	2.72067	5.59205	5.43874	7.43844	19.845	6.40951	6.63844	5.27985	5.73897	6.24696	6.52847	3.50485	9.05609	6.37103	5.09055	7.24236	6.48165	7.7635	5.74801	5.23444	5.78381	6.24178	6.74678	4.64133	4.29271	8.28583	6.71553
Tnfrsf8	11.5239	15.4399	14.4186	5.1482	5.38112	7.12205	16.1972	6.95599	5.17567	5.87121	5.17398	7.26936	6.56287	6.37026	6.28107	7.99971	7.5041	7.77521	5.64035	6.08361	5.5812	5.15727	5.14207	8.06883	6.80706	4.77517	4.46033	10.4894	7.59678	8.29288
Kcnip2	6.15004	4.77965	14.8756	6.35281	7.7295	5.40555	5.53289	5.49892	6.80231	6.22207	6.32477	6.11626	7.56157	7.53568	3.97819	9.24951	7.88676	11.5389	7.84165	5.90345	5.638	4.58997	7.01004	5.01141	5.87126	6.74244	16.8544	4.16721	8.89306	4.6612
Wnt4	6.93524	6.17596	9.817	7.04901	4.85613	6.46769	6.23901	5.87816	6.16922	5.69811	8.13842	10.564	8.86599	8.70638	6.69059	6.46722	5.62062	8.50834	7.21494	12.6574	24.971	10.1598	7.2769	5.27348	6.25603	4.83151	4.28364	10.6366	4.88795	11.1312
Cdh2	5.46014	8.163	8.55347	7.78185	7.84199	7.9471	6.43246	7.33522	7.8929	8.65944	7.45715	7.72636	7.56157	7.48822	6.91928	6.79455	8.54771	4.50715	15.8439	6.45232	10.192	10.1317	6.3583	7.05276	5.72876	25.1065	14.6652	9.32971	11.6363	13.0485
Pklr	8.10625	6.6951	5.24679	7.59406	6.95139	7.79537	7.73346	7.56975	21.7609	6.81153	6.66541	7.54037	5.68646	7.49877	8.00424	6.52178	5.9834	6.93884	5.4915	6.73723	6.19186	7.43116	6.99978	5.40681	6.63605	20.067	7.11498	8.32577	9.64671	6.07326
Park7	5.27859	8.7448	4.49853	12.2476	27.0462	6.79961	7.02251	7.76436	7.12117	5.47355	5.27525	8.16209	5.48774	7.62006	6.78632	10.663	10.0535	6.38641	6.77625	17.0526	8.1422	6.35751	5.44997	5.67807	7.8616	6.42612	4.57238	7.98391	4.86211	4.6612
Npap60	7.84754	5.95219	8.46834	9.33913	5.01081	16.4917	10.7369	8.92203	11.0907	9.02435	5.69874	10.6596	21.5281	7.78881	9.25939	9.65124	5.83431	7.94559	6.16129	5.60179	8.0712	8.93145	3.63332	8.10102	5.90452	4.34186	4.98609	6.03229	7.55802	6.29994
Scg3	5.10612	5.51361	4.69119	4.91461	5.04363	6.97505	9.10218	6.64661	6.09528	3.01279	5.80461	6.62107	4.96801	5.80601	7.15329	7.65255	19.5256	6.84591	6.0242	7.68412	5.15989	7.40771	18.962	3.74707	7.61459	7.1021	5.22311	4.85959	7.5408	4.82177
Agxt2	12.4635	7.87211	8.60724	5.59707	5.56393	20.6833	7.28851	6.00291	8.8541	5.13204	7.83922	7.80075	8.57046	7.02944	7.67981	7.30538	7.53888	7.00079	6.34931	3.64514	5.50072	5.70582	8.60603	6.91943	9.64293	10.287	4.65426	4.35762	18.9963	6.64469
Slc13a2	27.2054	10.3828	9.62882	7.63528	7.91699	7.63415	9.62935	5.44902	6.72375	5.95074	7.39731	6.50948	5.85461	4.65114	23.3851	9.78514	8.25948	7.4861	5.2134	7.31542	7.01082	5.71988	8.13391	5.29647	7.12057	6.26146	5.51616	6.13615	7.30824	5.75212
Rnf39	11.5149	5.56284	13.3432	6.48563	6.37953	9.52609	11.2786	9.45595	9.28386	5.37063	6.58715	8.86352	22.5522	7.30893	7.06819	6.73999	5.49141	6.28316	7.64188	8.96621	8.66293	8.39697	7.11781	9.94466	6.46979	12.7006	14.2989	8.64167	23.7033	7.88201
Lphn3	6.93978	6.04617	4.84801	2.72067	2.78431	17.4258	7.1144	5.36918	16.5991	7.01738	6.55953	8.91666	5.90047	8.16849	7.16393	7.85589	9.46212	5.27124	5.69518	6.4188	7.20964	7.16392	6.36344	5.09877	5.73351	5.94947	6.60646	4.44416	7.76474	9.43102
Ucp2	11.2834	25.6078	8.42802	9.03683	13.659	8.18893	6.80003	8.55776	8.38736	10.6196	5.2154	9.57558	8.57555	8.24232	8.25952	11.273	11.0275	7.80619	9.8001	18.0036	5.16935	8.75798	9.31422	7.39758	9.49568	6.0058	5.64544	8.81476	5.3746	9.16656
Srpx	7.89293	18.0624	11.2105	10.301	8.99978	9.24633	6.52919	7.53482	3.80782	7.46181	7.38811	7.6679	7.53609	5.89038	7.88191	7.474	19.5405	9.25695	6.83108	8.33774	7.19544	7.16861	8.42642	7.45735	7.96136	11.2793	4.27071	10.9698	7.26518	4.67065
Arg2	5.73247	17.239	3.66065	4.90545	5.40924	8.91915	6.37443	7.73442	6.0121	8.72962	9.27081	7.03555	5.26864	6.19624	5.93005	5.28189	15.2616	7.67196	4.30468	7.4872	6.01671	6.50754	6.4866	6.75851	8.42213	5.99713	2.93046	5.66879	5.81387	5.72851
Pygl	25.9028	12.6473	7.31683	12.1697	13.1856	7.33068	6.47599	7.85418	21.1417	4.711	7.25001	7.50317	7.33228	8.59564	8.95092	8.52046	11.5195	9.55123	6.2553	7.48301	6.39068	7.74997	10.628	8.56078	7.70485	14.8628	12.5967	11.528	7.63124	10.3141
Lyn	27.2054	8.13168	9.83045	9.17882	8.56854	6.55304	8.92323	8.8372	6.72837	8.94949	8.50208	7.86983	8.9679	7.72025	9.04665	5.19262	9.76526	8.85425	16.1847	6.18417	7.51734	6.77947	9.41173	6.35852	9.8852	13.0732	12.2002	11.6275	11.9766	12.6282
Ambp	5.73701	7.33954	7.47813	5.72989	9.08884	10.9581	5.75536	8.70746	8.48903	23.017	6.72985	6.72204	8.04054	8.8013	6.70654	6.07542	4.14962	7.31572	5.20165	8.47181	7.1197	5.39169	5.97855	7.21368	6.11353	4.38519	8.36904	5.34857	4.76306	15.0604
Fgr	6.83993	6.69957	4.48957	6.57724	8.03418	6.73323	6.17613	7.35518	5.92892	6.87235	8.04176	9.33646	7.32209	8.47435	5.98855	7.51368	7.37986	7.31572	6.38847	6.89225	5.66167	4.40712	7.31795	19.733	5.83326	11.5869	24.4392	14.1677	9.75007	9.91745
C4bpb	14.0248	4.90944	14.3379	9.18798	8.36698	7.80485	5.99235	8.80227	5.22188	5.5063	19.4669	8.0505	4.58076	8.71165	7.96169	5.99607	5.12863	7.40865	5.29566	6.26797	3.68766	4.89941	7.3744	6.54702	5.43425	11.4613	12.8337	14.3234	20.6328	12.1276
Fxyd7	5.41022	4.98999	5.60972	5.09324	5.85923	5.74695	6.19064	5.46399	5.6193	16.5142	3.57207	5.8665	6.85841	6.76577	6.87141	4.04201	5.33735	6.57228	5.77352	6.9551	5.89836	5.87929	5.70143	21.8617	5.73351	7.9514	7.50714	6.40444	9.66394	4.15588
Atp2b2	20.6605	9.78755	11.3404	7.41085	9.78726	4.72748	6.74199	5.53884	19.5982	6.75072	8.18906	8.57126	8.36664	8.3056	8.11592	8.64445	7.847	6.7633	8.7347	6.91739	7.83924	5.7105	9.02171	6.7769	9.51468	11.535	8.14064	12.7786	5.7062	11.7876
Cspg5	5.61446	7.91686	4.79873	5.61539	8.29667	5.55728	6.97414	7.28532	5.21726	15.092	6.39382	7.03024	6.60873	7.70443	6.97778	6.25892	6.20703	5.35901	5.01756	17.3794	8.35049	5.53703	6.38396	5.70565	6.82131	4.20753	8.94651	8.05315	4.41423	4.76038
Tm4sf4	4.89734	11.6761	5.92784	6.83831	9.28102	5.47193	5.42165	7.10569	6.80693	7.55538	6.90017	8.60846	6.43549	8.75911	9.13706	20.7755	9.12419	8.67871	6.21221	5.58922	10.4855	7.44991	7.95943	9.02514	7.13482	5.89314	9.14906	7.96228	4.54773	23.0699
Itih4	8.27872	7.58121	8.42802	6.41693	7.17639	5.54306	6.35508	6.7514	4.7875	6.80218	19.7062	6.46697	5.91066	8.4638	7.91382	7.81125	8.42844	7.54805	8.05316	6.17998	5.22143	5.3073	9.23211	6.03209	7.11582	9.90567	7.56317	4.30136	21.0419	5.40265
Ppp1r14c	5.35121	5.05712	5.77998	2.85808	5.28268	9.40281	8.91839	9.18649	5.55923	5.52969	7.12572	3.42744	8.54498	6.31226	8.77009	5.65386	5.49141	6.29865	5.61684	7.04308	8.35523	8.28445	7.06649	17.9169	7.93761	5.25616	5.04211	19.1224	7.16613	5.8938
Faah /// LOC100911581	5.5373	5.58074	4.65087	6.87496	7.49982	8.33592	9.26662	12.1156	12.9392	23.017	5.58366	8.15146	5.27374	7.44076	6.41935	6.8491	5.07396	8.35345	6.6039	7.45787	5.77528	23.9063	9.31422	5.04819	9.32467	8.01207	6.50734	8.23057	8.50978	5.6435
Aldh1a7	12.999	11.3584	10.1979	8.75286	13.1856	3.21962	6.69847	6.84621	5.96126	5.62326	8.62636	10.2664	7.8622	9.27063	9.77528	9.19496	9.84478	11.3737	6.18479	6.0878	18.959	7.13579	8.55985	7.7516	8.49813	14.8628	10.2221	12.9906	24.7585	12.3354
Tpm1	8.18795	7.06655	9.91558	7.88261	8.68104	4.2296	21.9139	6.63663	6.28474	5.82442	7.77017	7.27468	6.6444	4.52457	6.02578	5.35629	20.3505	6.41739	5.31916	5.26241	7.65462	9.28777	6.15816	5.95393	5.48175	4.79684	5.53339	4.66053	4.35825	4.71787
Adcyap1r1	5.21959	5.13321	4.736	5.22607	5.27799	10.8016	6.67428	9.35615	8.66463	9.00563	6.12223	6.23847	21.1357	7.22455	4.73872	15.6969	5.72498	7.92494	8.12758	5.8029	7.08656	6.35751	6.04526	6.51024	6.10403	6.85944	9.86875	5.64283	9.75868	5.23264
Orm1	9.50873	5.1153	6.9763	6.54976	7.21388	8.33592	6.22933	11.2623	11.1785	23.017	6.33398	5.95684	7.54628	7.60951	7.09479	5.32653	3.86138	7.09372	7.05827	8.22042	6.32441	6.80291	7.65152	6.15622	6.24178	6.40012	6.11518	5.43079	5.26262	14.8431
Tap2	14.3652	9.44742	14.4186	9.68265	9.93725	6.79487	6.60657	7.68452	6.58512	6.47938	6.15906	8.89009	7.58705	8.10521	6.2917	7.14172	5.70013	7.00595	6.57257	9.9173	7.57414	7.07953	7.10755	21.3928	7.46734	25.0762	7.36924	13.8388	8.50116	10.6967
Sult1e1	4.41169	9.25499	4.74496	8.0017	8.94353	11.2947	7.28368	10.7833	8.48903	23.6018	5.88287	9.04951	6.44568	8.93313	8.71691	9.61156	6.82326	7.61517	9.18515	6.95091	7.62148	10.4083	10.4791	9.1079	9.15841	7.26676	24.4392	12.2939	7.87671	11.7309
Tsx	6.45867	10.705	7.18689	9.14676	13.0075	7.52509	7.99463	5.93305	6.45573	5.49695	5.82302	5.68583	23.8872	8.8804	7.9351	8.63453	10.4859	7.44479	5.64035	6.10875	6.33388	7.17798	7.3898	6.65276	7.21083	4.21186	22.1637	10.3639	7.87671	9.31768
C9	8.3468	11.3584	8.51763	5.46882	7.86543	8.82906	9.1312	6.45699	6.5158	21.1363	5.85985	8.07707	6.5374	5.64781	9.02006	8.97178	5.55601	8.7768	7.3912	6.56963	6.18713	8.05941	8.49827	8.45503	7.56234	7.31009	11.2478	6.77659	9.00072	23.8491
C5ar1	9.42703	8.20328	9.3555	5.01079	5.69048	7.55354	6.80487	3.6227	7.28753	7.19047	6.5043	7.54037	8.10168	24.8641	5.16951	8.55518	7.67306	5.69976	5.24082	6.7875	7.05342	5.97774	8.40589	6.49185	8.74989	10.391	9.35592	9.41626	19.2977	9.49714
Slc10a2	6.41782	6.32812	5.47978	4.09932	6.10766	6.87074	7.54001	6.01289	15.8043	4.88877	18.6291	9.91567	7.95392	9.73469	6.42466	5.87208	5.70013	6.26767	5.62859	5.22889	5.86049	5.8746	9.12948	4.82751	8.44113	4.25953	5.33947	6.46935	4.45299	5.63878
Tesk2	8.08809	8.40915	17.2234	10.1682	5.51236	8.23161	5.52321	7.01587	5.50377	4.25253	6.87255	5.97278	7.11827	6.2437	7.21179	5.8572	7.51404	5.95274	7.03476	7.26095	25.1083	9.52688	6.45068	7.86654	5.10648	6.1618	7.91654	8.41665	8.91459	5.69545
Clec4f	12.704	7.29927	12.6129	9.90708	10.4435	11.4465	10.5579	11.7314	6.10914	8.48635	8.66779	9.51181	8.20869	10.0142	8.66904	10.2017	9.50685	8.85941	5.38575	9.06257	6.66525	9.58315	6.62003	9.08031	23.9458	14.7328	12.0364	9.56771	23.712	9.32713
Abcb11	10.0534	5.16006	21.8519	4.95583	4.903	24.3013	7.81085	7.16557	11.3588	11.1951	5.0681	5.63269	8.3055	7.46186	6.29702	6.37299	7.9116	9.07108	7.53613	5.75681	6.5469	6.77009	8.47774	9.16307	7.41983	11.392	12.963	8.50752	7.82073	5.47821
Sulf1	4.39807	5.58074	4.63743	5.74363	5.38112	5.80859	5.68281	5.39912	6.15073	6.14722	18.1181	5.91964	5.8699	6.4019	7.23838	6.8987	6.25673	5.9992	6.91726	5.04873	17.9555	6.91543	5.373	3.97235	6.77381	4.95284	8.34318	4.42685	8.88445	7.69783
Cenpi	10.4619	18.7785	7.37059	10.8094	9.48727	7.54406	7.9366	6.97096	8.53062	7.90624	5.05429	7.67322	7.84691	4.66168	7.22775	7.06236	7.30034	21.9162	6.23571	7.1604	7.40846	5.18071	6.67134	6.3815	5.5435	5.74148	5.64544	7.51223	7.00248	11.4759
Gucy1b2	11.2335	5.23614	8.17262	18.5638	7.04983	9.1183	8.04783	7.45498	5.05552	6.03027	5.32588	6.81237	6.81255	8.68528	8.3978	8.45103	9.73048	9.13304	16.2512	4.75963	5.84156	7.99377	7.65152	9.6918	4.4842	9.44202	4.50342	7.3478	5.12481	7.83951
Adrb3	5.11974	7.75127	5.06756	6.15586	7.80918	7.30223	7.83019	7.01587	6.16922	6.36242	7.87604	6.0578	8.13735	8.19486	7.14265	7.14668	8.15511	6.04051	2.82409	5.78195	4.7007	6.1559	26.0747	6.79069	7.71435	6.25713	15.4108	4.40954	7.85518	4.82649
Gpr12	6.99425	5.66577	5.34536	5.92684	6.46859	5.67582	8.5605	5.64862	6.31247	9.60913	7.90366	5.96747	7.06732	20.292	6.97778	5.13807	6.048	6.05083	6.24747	13.487	5.2593	7.22955	8.73946	4.66199	5.68601	6.73378	2.86151	7.5382	6.00335	7.83951
LOC100909524 /// Serpina10	11.6056	5.47781	14.0557	6.54518	7.26076	9.20366	9.26178	4.45602	8.45668	6.34839	19.4669	9.03357	8.5297	8.84876	5.88218	8.85771	8.98007	6.92335	6.36106	5.43	15.4702	5.39169	7.34874	5.94933	7.51484	7.89507	11.1142	13.8691	6.78715	13.6861
Birc5	10.9248	18.8456	11.4121	9.09638	10.6544	7.91391	7.42877	7.08074	9.09439	6.86767	8.20747	7.71041	8.59084	7.9101	8.42439	9.01642	9.44224	20.2176	8.21375	6.30986	6.96348	8.39697	8.23141	4.81371	6.37004	5.70681	10.7177	7.82813	12.0756	11.7876
Cxxc4	9.10024	8.28831	5.13029	5.44134	6.10766	5.99352	5.35877	3.47799	5.61468	6.60101	19.8443	8.55	7.66857	9.22844	6.95651	23.6321	4.94475	4.4865	4.36343	8.2288	7.47473	4.63685	7.24097	7.59528	9.51943	6.28312	5.19294	6.4607	7.1489	8.84542
Uts2	5.08343	5.14216	6.55512	6.41693	5.28737	6.39656	7.42877	7.71446	5.56385	7.48052	5.34429	6.18002	6.03295	6.56538	6.4938	6.8987	5.04911	6.1799	5.25649	10.3363	11.2287	23.6766	5.68604	8.37228	5.80476	5.71114	19.9142	4.71678	5.53394	5.58211
Sepp1	6.74915	5.0079	8.06061	4.67644	5.5358	13.291	8.8797	11.0627	8.48903	23.017	6.08541	5.74428	9.0749	6.38081	7.77555	6.69536	4.90003	7.99205	6.95643	6.05848	5.56226	6.22623	8.49313	6.16542	6.46504	9.71934	6.58922	4.59129	6.39095	14.8431
Rtn3	11.3787	7.16948	8.21743	7.90551	3.3796	7.33542	6.38893	7.70947	5.41135	7.20919	6.61017	21.6221	7.53609	6.8976	6.51508	6.9235	8.50299	7.26409	5.02147	5.55989	6.13506	8.47668	6.83556	2.62984	8.58364	4.8965	13.6913	8.62868	6.5589	4.97762
Cap1	22.3807	7.98399	11.5868	5.07492	8.2123	8.1747	8.24613	7.82923	6.78845	7.92028	7.93588	8.60846	7.25585	4.88317	6.01514	11.3722	10.5852	11.3427	16.1964	7.73021	7.26171	7.35145	10.2995	7.02977	9.63343	14.0005	11.1831	7.83678	12.0282	7.63644
Mbp	6.61753	5.84926	5.57387	6.92992	8.67166	6.97979	16.4923	6.49691	7.07958	5.36128	6.16366	6.88145	6.52211	6.60757	8.42971	8.07411	7.92651	6.45353	7.0191	5.25822	6.01671	6.8076	3.19198	7.13092	6.68355	5.48582	5.89108	4.20183	8.44948	16.241
Lmnb1	6.66746	10.3649	7.50501	19.0218	10.1341	6.68107	8.42991	9.36613	6.90398	7.19983	8.2489	6.23316	8.39722	9.17571	20.6674	8.21297	6.84314	9.77323	9.61992	6.08361	8.98009	8.92208	8.20575	9.97685	8.02311	10.1613	8.89911	10.7967	10.2712	5.40737
Cebpd	5.56	9.01332	6.28181	5.55126	9.26227	8.44024	6.19548	6.52186	11.0353	10.6009	8.35938	9.14516	8.09659	7.20873	6.38212	11.1639	9.32794	6.16958	7.93174	9.01649	6.05458	24.9237	8.3751	8.95158	5.71451	9.44202	5.12399	5.77265	10.7793	22.7251
Aldh6a1	6.14096	11.166	3.36493	8.50094	8.06699	7.64363	7.86888	7.39011	5.73021	7.77525	8.12922	7.83795	5.41641	8.17376	5.98855	8.5651	8.11039	19.8252	6.07512	3.95519	19.5129	6.35282	8.26733	5.35623	8.62164	10.469	9.65327	5.59956	9.58211	6.72498
Itgb1	12.7358	5.19586	13.8585	8.53301	9.13102	8.51611	7.63674	6.90609	7.45389	9.16469	7.71493	9.47462	8.12716	7.69916	6.9831	5.37613	8.84092	6.65488	8.44485	8.86565	5.94097	5.80896	5.2601	6.82747	21.6372	9.19936	4.55514	13.8734	23.0875	13.2752
Nfyc	9.10024	12.8532	20.1762	9.64601	8.56854	9.61144	6.82905	7.3951	10.051	9.76351	8.57112	8.42247	7.7501	7.51986	6.22788	6.53169	10.1131	7.42931	17.7945	7.56262	7.43686	7.44522	4.40822	6.21599	6.79281	6.0448	7.93809	8.11373	7.31686	10.9611
Fstl1	22.4715	10.0247	9.86629	9.10554	7.92637	6.52933	6.82421	7.34021	8.16093	7.48052	8.66779	7.21091	6.35906	8.01556	7.9351	7.79141	7.12144	7.14019	4.8648	6.13808	7.31852	6.89199	7.70797	22.3904	7.7951	6.95044	10.0067	10.338	11.9766	7.23502
Cald1	4.79748	9.36239	5.30952	14.6843	8.41386	5.62841	5.61027	6.452	5.32355	5.41742	5.12334	6.56793	6.21639	7.74662	6.9246	6.95325	9.70066	11.1362	5.2369	6.62829	7.57888	5.26042	7.93377	19.733	4.81672	10.417	4.69304	9.87495	10.9602	4.85011
Comt	7.0351	11.7164	6.87325	11.1941	10.6216	6.6621	6.58239	6.22247	6.45573	20.5282	6.48588	6.68484	6.6444	7.34584	6.77036	7.46409	3.86138	7.69777	6.07512	5.74843	6.87827	5.45264	6.035	5.33325	7.97561	4.86184	5.02918	5.50436	4.74153	14.8431
Fbn1	13.8206	10.5439	12.1962	10.9422	7.0592	9.49764	11.6558	11.4869	6.74686	8.884	8.36858	9.1983	8.56027	4.18708	8.30207	11.2085	11.4649	10.8471	6.52948	8.97878	10.2582	10.1082	18.9004	8.16079	8.20837	11.2793	8.67071	12.9474	19.5303	6.31883
Src	8.39219	6.87858	4.26554	6.04135	8.44198	3.11056	5.6538	7.2953	6.52966	6.71797	6.02556	3.08204	6.9705	7.57787	6.91396	19.5951	5.70013	5.24027	6.19263	6.41461	6.15873	4.55715	6.36344	16.3721	7.06357	4.82284	7.77433	4.24943	4.90087	8.92098
Mark3	10.2667	9.12968	10.0993	8.05208	9.10759	6.73797	7.3804	6.57675	6.27088	7.08287	7.43414	7.91234	8.68765	7.59369	8.31803	24.5149	6.15237	7.98173	9.45149	6.86292	6.16346	8.3876	6.39936	7.86194	7.33908	7.99473	11.3857	10.074	10.1161	23.0038
Stat1	3.99412	7.03075	8.8716	7.2826	7.00764	8.97605	9.19891	6.89611	5.90119	8.87464	8.26271	7.5882	7.76539	5.80074	8.64777	8.45103	6.68908	5.67394	6.52557	20.2745	7.55047	8.21881	7.23071	6.23898	9.49093	18.6284	5.33085	8.74985	8.37197	5.36015
Acan	4.80202	5.13768	5.4753	4.91919	5.20768	7.03195	7.51099	4.3213	5.41135	6.13319	7.40192	7.08869	6.41001	6.28589	22.231	15.3101	5.39699	6.52581	4.42219	5.83642	5.78475	5.3073	6.06579	5.34244	4.91647	4.79684	6.63662	3.41426	4.38408	4.9115
Tpm4	13.2623	10.2977	27.0046	12.1697	8.94822	6.09309	7.23531	6.9011	5.89195	8.66412	7.75176	8.84758	9.8494	8.89095	7.85	8.88747	11.9916	25.8761	7.12877	6.75399	9.20732	7.79685	8.93447	8.87802	7.79035	13.9095	7.27443	10.9654	11.8603	8.1087
Tcf4	8.10171	6.90096	6.12051	5.23981	7.72481	7.84753	8.21227	8.67752	8.4844	6.91913	7.68731	9.54901	7.16922	9.24954	8.802	6.57633	6.02316	5.98888	5.35833	18.1754	5.9173	5.54172	5.75788	5.24129	7.20607	19.4214	4.91714	7.43002	7.49343	6.50774
LOC100910779 /// Yme1l1	4.93818	11.1704	7.82314	10.5987	7.77168	8.52085	8.78297	8.56275	7.35223	10.4091	5.94731	5.62207	6.54759	7.06108	17.8859	10.2414	7.36992	9.11755	7.25019	9.56954	7.01082	23.9438	7.40519	9.03433	6.12778	4.34186	7.56317	5.20144	7.05846	5.95047
Hspa13	7.85662	22.4841	5.94576	7.91467	4.96394	5.87023	6.83389	6.27236	6.45573	6.90978	9.25239	10.4152	9.24305	11.1163	22.0343	11.1391	5.72001	10.2224	6.82717	8.01093	5.86049	6.54504	7.53862	5.91255	7.82835	5.21716	7.30029	5.70774	7.55372	7.13584
Rab10	6.70831	5.53151	27.0046	5.08866	5.37174	6.44872	5.99718	5.77337	6.41876	6.76007	6.67922	6.63701	6.65459	5.84292	6.10556	20.5721	6.95744	7.56354	5.78919	5.78614	7.26644	6.7654	6.99465	5.24129	5.89502	6.75111	6.46424	4.54802	4.87934	8.62346
Lman1	9.63581	7.85421	7.16449	4.85049	6.92795	9.9244	7.06604	11.4869	6.18308	9.4641	8.58033	8.85289	7.7501	8.61146	6.04174	8.32704	11.6736	11.0278	17.7945	7.76373	5.8747	5.72926	6.8253	7.19528	5.439	6.07513	10.61	9.32106	9.97401	21.705
Ets1	13.2124	11.0048	14.4186	8.47346	11.3528	7.53932	7.42877	7.20549	6.51118	7.49456	7.34207	8.61908	7.94373	6.24898	20.6461	8.16338	9.5963	9.00913	4.32426	6.19674	5.86049	9.17056	7.75415	7.01598	6.17053	4.22486	8.6233	11.8396	20.383	7.8584
Dnaja1	4.45254	10.1053	11.3404	5.66577	8.12324	6.3207	6.29221	7.15559	5.17567	3.66307	7.76557	7.50317	6.48644	8.89622	6.9831	7.00285	6.6692	7.35703	14.9861	5.27498	7.87711	8.46261	6.99978	7.66424	6.5648	12.3799	8.67502	12.3415	19.6595	12.3685
Vsnl1	5.40568	7.03075	5.77102	4.90087	7.51388	24.3013	6.30672	5.97297	2.98525	8.64541	7.07969	5.367	8.0864	8.26869	6.38212	5.13807	7.26556	6.39674	5.38966	4.94398	5.78475	5.10101	6.44554	18.1284	6.81181	5.08716	4.51635	7.3954	7.26518	5.51127
Ighmbp2	5.2559	4.83783	5.87855	5.36347	16.7668	4.33392	6.26319	7.11567	6.83004	5.92734	7.05668	6.87614	3.52092	5.98003	7.16393	8.82795	5.83431	8.3741	7.48912	5.61854	6.12559	6.48878	5.11128	8.36768	5.439	5.41649	13.7904	7.58147	4.87934	6.34717
Jak2	9.84914	5.45543	7.44677	6.17876	5.6483	5.16372	6.01169	6.66657	5.69786	3.59758	7.70112	6.57856	7.79086	5.87984	6.79164	18.4395	6.0977	6.99563	6.06337	5.78195	15.9672	4.65092	6.57897	4.80912	6.06602	8.24606	9.25249	9.19989	6.60197	6.59747
Ppm1a	7.53436	9.13863	8.20399	10.7224	18.1542	7.44922	8.54599	6.4021	9.13136	8.16355	5.60667	9.24081	8.50422	8.01029	8.82859	6.55153	5.83928	5.48808	15.7068	7.75116	9.84639	8.93614	6.08119	6.63897	6.15628	4.50652	6.50303	8.68494	7.88102	4.64231
Nme3	4.82472	7.67519	4.44924	5.76654	18.773	7.68631	7.03702	6.65659	7.15352	4.00458	5.69874	7.56694	6.3081	7.18237	22.832	6.56641	6.32133	7.7907	5.45625	5.41743	6.77412	6.23092	5.53208	3.52638	6.40804	5.44249	10.2006	7.68966	7.00248	6.71553
Akap12	5.60085	7.80945	6.85981	21.1379	5.07644	6.09309	6.45181	7.04082	5.34203	6.31096	18.0721	6.88677	6.68007	7.16655	8.2542	5.84232	7.60349	8.06433	4.57886	3.35185	7.05816	8.80487	5.45511	6.21599	6.41279	7.48342	7.72693	5.59523	7.60109	6.16771
Id2	6.97155	5.44648	6.94046	7.20015	5.67642	7.65786	7.70928	6.10271	6.77458	8.02788	4.24874	6.46166	6.89917	6.96088	6.12151	22.9676	5.94364	4.35226	14.1988	6.44813	7.41319	7.91875	6.89201	6.71713	6.5648	7.76941	6.54612	10.3293	4.85781	5.7899
LOC100912399 /// Map3k1	12.5452	7.54093	10.9864	7.91009	5.70455	11.2568	6.20999	8.42802	9.59348	10.7272	2.94604	8.54469	7.13865	7.70443	8.20634	26.0177	11.0176	7.25377	6.07904	8.15757	8.65346	6.92481	6.06579	8.78606	5.40574	6.07946	10.7177	13.6094	19.7456	10.9375
Zfp354a	8.49658	5.75528	10.2471	9.4857	5.99985	5.62841	21.7833	7.76436	6.92708	7.36825	5.80921	5.81868	4.8712	6.18042	7.10542	11.3722	9.89944	10.1553	8.51144	8.04864	10.3292	8.60795	24.4069	9.37456	5.26324	5.08716	8.4854	5.6385	7.6097	5.4971
Idi1	13.7616	6.34602	8.70581	6.40319	6.17797	6.07413	7.85438	7.64959	6.71913	7.24661	19.7062	9.01762	5.2075	8.622	6.71718	6.77471	7.52398	5.24027	6.68616	5.89926	8.59192	8.28445	7.42572	7.54011	7.61459	14.0049	12.963	23.8306	9.25051	11.8773
Bet1	9.25456	10.6334	18.944	7.15893	7.5045	6.00774	7.41426	8.46794	7.06109	6.05834	5.30747	8.19398	8.46346	7.83627	7.73832	7.98484	9.11922	4.81175	15.6324	6.7875	6.24393	3.71323	7.65665	6.85046	6.6788	8.38905	9.98941	8.94891	7.4116	10.9848
Map3k12	11.1336	4.7707	11.3494	9.52692	7.14826	7.59622	5.79405	5.5588	7.89752	5.22561	8.9716	7.45535	6.92465	8.83821	9.19025	6.81935	7.15622	5.94757	6.01245	6.23864	6.35755	5.3073	6.39936	21.4295	7.06832	9.42902	24.4392	12.1684	9.75007	8.51012
Rtn4	10.1305	22.6407	7.03455	6.38029	9.48727	6.27328	10.7756	8.62263	10.3929	9.23019	7.90366	8.47561	8.28512	8.75384	8.25952	9.76035	7.71779	10.1553	19.2673	7.42436	6.99662	6.98107	7.62586	6.34472	7.15857	12.4709	9.61018	12.3372	11.1368	12.6613
Adcyap1	5.55092	7.33507	10.8162	6.54976	4.58426	6.5483	5.95849	6.1077	7.12579	7.30743	9.02684	6.10031	8.06092	5.99585	6.73313	5.18766	14.9237	6.35027	7.54788	14.6727	6.79779	5.20415	6.67648	8.93778	7.31533	10.1137	6.37805	4.40954	9.74145	8.95876
Thbd	8.7326	16.7512	5.86511	6.04593	8.20292	5.42451	6.31155	6.58673	5.79952	6.17529	9.04065	8.81038	8.18321	9.80852	7.51494	6.97805	7.08168	22.2001	6.13779	8.01931	5.17409	5.80427	6.70213	8.78606	8.44588	3.94754	7.23995	7.96228	4.65971	7.40503
Scamp5	6.90801	15.5742	8.98361	4.62147	18.6558	6.10258	8.40573	5.41409	9.60272	9.27229	9.21097	8.16209	9.37044	6.15933	5.82368	9.7653	6.34121	3.583	8.73078	5.89088	7.38479	6.74196	6.55844	10.5607	9.37217	12.9996	7.11498	4.33598	10.4176	10.0969
Anxa4	5.04258	6.27889	5.44842	6.52228	5.74205	9.35065	6.34541	7.55977	10.7719	5.86185	19.4254	6.26504	9.81883	8.87513	6.63208	5.60426	8.47814	7.23312	5.32308	6.90482	15.6359	6.32469	6.17356	7.23666	6.77381	9.22536	7.15376	6.05825	7.94992	7.83006
Kcnj8	9.3771	10.4812	6.22804	9.43074	6.10297	7.54406	3.54995	8.49788	5.4437	5.2911	7.47096	8.45967	7.22018	5.53179	8.19038	9.44294	7.48422	9.83518	9.65909	16.2565	6.54217	7.84374	6.97412	4.97923	6.67405	8.19406	6.53751	8.58974	22.7344	8.41566
Nudt1	7.26204	7.88106	5.24679	2.89472	7.01701	7.16472	7.24982	6.17756	5.7071	6.54955	6.92779	5.80274	6.21639	6.09077	6.37148	24.3413	5.70013	5.26608	7.52046	5.86993	5.40131	5.04006	5.82973	5.71945	19.0246	4.48918	4.96454	5.65149	5.48657	4.64231
Arhgef7	24.346	9.31764	10.0993	8.40018	5.39987	7.01299	5.67798	6.7514	9.15909	7.30743	7.14874	7.96017	8.3055	7.90482	7.48303	5.18766	8.31414	5.67394	17.1639	5.46771	6.46643	6.82635	3.9207	6.15162	7.01607	11.6476	9.72653	6.67273	9.2462	8.26454
Txnl1	5.49645	7.90344	4.53885	9.08264	8.31542	8.53982	23.2633	6.48194	8.31804	10.6056	8.967	8.25774	7.26094	8.09466	4.70149	5.71833	6.61951	8.03336	14.8607	5.3085	7.54101	5.50421	10.0891	8.60216	10.2795	5.51182	7.27443	6.64677	7.05416	5.81824
Hes5	6.08196	7.23661	8.91192	6.6322	8.32479	6.78538	7.67543	5.958	16.2618	5.68408	6.13144	17.2701	8.5297	6.03804	5.99919	6.07542	7.31525	6.1799	3.43121	6.24283	7.8061	9.6816	5.49103	5.75623	6.09928	5.78481	4.31381	5.68178	2.82511	4.46285
Bmp2	4.23467	15.8919	8.15918	14.4278	6.12172	7.56302	5.28623	6.83623	5.20802	6.0443	3.13477	7.7423	5.22788	5.50543	6.79695	7.31034	8.26942	7.47061	6.32189	7.09336	6.37175	6.98107	6.02987	3.8712	6.04702	4.48052	9.96786	10.7015	4.38408	8.34483
Msn	21.9177	6.29679	8.27568	6.34823	7.48107	5.9461	6.07457	6.66158	6.21081	5.95074	21.391	6.46166	8.39212	7.40912	6.47253	11.5011	11.1915	11.0433	8.30776	4.38674	6.40489	5.98243	5.7117	6.3815	5.51025	7.73908	7.75709	4.7514	8.38919	12.2268
Ebf1	4.79748	4.7707	4.88834	21.8341	3.82491	8.4924	5.34426	7.21546	5.24037	6.81621	6.48128	5.72834	7.23037	6.06968	7.04692	5.13311	5.9834	6.59809	2.88284	8.57656	7.29958	5.45733	6.07092	8.17458	5.49125	14.2129	4.28795	5.82458	5.31861	7.73561
Uggt1	7.38004	11.0764	7.50501	10.5987	11.0529	8.64413	3.3178	6.71647	7.01026	6.46534	18.1688	6.22253	6.84312	8.18431	6.02046	4.99424	7.03198	8.46187	9.11464	8.58075	6.22027	7.68902	7.1486	7.70562	8.08486	7.21043	5.29637	5.05864	5.72343	21.2375
Cask /// LOC100910506	5.02442	9.19233	5.29159	4.99247	10.7435	5.31545	8.45893	9.2813	5.62854	7.99045	6.80811	5.95684	9.15643	7.08745	8.51481	5.37613	7.49416	5.21962	18.006	4.41188	6.64631	5.8746	8.86776	5.82979	5.37249	7.06743	7.67952	24.3758	5.07314	12.6282
Pacsin1	7.13495	5.17796	4.85249	5.31309	6.26703	5.50038	6.65978	18.0936	5.96126	6.38581	6.39382	8.56595	8.09149	5.62671	5.81836	20.1605	7.25065	3.02542	4.23418	5.62692	7.70669	9.74724	6.24027	6.11024	6.43654	4.95717	4.77061	8.46857	8.20832	4.68481
Lgals8	9.8219	8.1451	27.0046	5.20774	7.51388	7.00824	6.36475	6.75639	6.57125	8.48635	18.5278	7.62539	6.6444	4.8357	6.81823	9.68595	10.4511	10.9762	6.29447	6.20512	6.58004	7.46866	8.28273	5.88956	7.68585	8.14206	6.20998	11.4241	6.14978	13.6861
Mxi1	8.35588	5.75528	7.00319	7.17267	6.99358	5.19691	5.44099	5.72846	3.93721	5.41274	16.4978	7.01961	6.60873	5.50015	6.74377	5.63898	8.86577	9.4996	7.93174	5.3881	6.36701	5.13383	23.2522	4.88268	5.34874	4.9485	4.61547	4.4658	5.82248	5.07679
Mybph	4.34814	5.37935	4.98243	8.19407	7.67794	4.11106	7.11924	6.28234	6.09528	6.325	8.00954	22.8655	8.50422	6.81323	6.62145	7.37977	6.11758	3.49523	5.7226	7.0347	7.71143	6.55442	6.55844	15.1722	7.29633	10.5903	6.98569	4.62591	5.52963	9.16656
Gucy1a2	4.34814	4.89154	9.40479	5.37721	5.32487	5.78488	5.95849	6.70649	6.23853	16.1587	6.04398	3.01296	7.68896	8.55872	6.04174	7.40953	10.9381	9.1382	2.49507	5.69815	7.30905	5.35418	6.88175	5.98151	4.55546	11.0453	7.9424	7.85842	15.8008	5.21847
Cd38	10.8386	23.0972	6.13843	10.9514	7.47169	11.2947	9.27629	8.59768	8.84485	7.30743	6.97842	8.71473	9.01376	9.47629	20.1249	9.12553	9.19873	8.22438	6.12604	9.16313	5.99304	7.34208	8.57524	9.97685	7.93761	13.8402	12.4458	12.2463	13.9016	6.47468
Plce1	6.50406	8.12273	4.76736	7.6307	6.00454	5.48141	5.56674	7.61466	16.0169	6.37178	9.19255	6.54668	6.34377	8.15794	6.50444	22.9428	6.31139	5.06989	4.62195	7.99836	5.28297	5.86522	8.46234	7.21827	7.58134	10.0053	5.15847	8.58974	7.02832	5.7474
Hbegf	5.12881	3.17301	5.09445	5.97723	2.59212	6.63839	5.73118	6.8512	6.81617	6.99399	5.85064	7.86983	6.44058	5.85874	6.4353	5.83736	5.66534	5.78236	11.6097	6.5822	5.82262	6.87792	7.32821	14.3354	6.6598	5.49448	4.54221	5.41348	5.8354	5.71906
Smpd3	13.2623	10.2575	13.6793	12.1468	11.231	8.30747	7.63674	7.37514	7.65722	9.68866	6.85414	7.95485	7.38833	7.15073	8.69032	5.86712	7.42458	9.04527	5.64035	7.22743	18.959	5.56985	7.32308	9.42973	6.41754	11.158	20.3796	4.16289	10.0343	8.07092
Srsf5	8.18795	8.85668	8.02028	7.0032	9.64664	22.3192	9.98241	6.40709	9.40401	8.52845	4.67683	7.82732	8.72332	6.74995	6.50976	8.46591	5.83431	7.27958	7.97874	6.45232	22.6041	6.09027	6.27619	8.86882	5.72401	4.99183	5.96434	5.37886	6.78284	7.54671
Ralgapa1	6.69469	5.50466	6.6537	6.2612	6.60921	7.01299	5.64896	6.08275	6.52504	19.4896	6.97382	6.87082	6.31829	6.85014	6.42466	7.82613	6.44557	7.98689	7.03476	7.75954	7.76823	9.15181	6.95359	5.2321	21.3807	4.79251	4.96454	7.64205	2.85095	8.29288
Begain	5.18782	6.10883	4.8749	5.10698	6.5764	5.95559	5.5619	10.7583	10.7765	8.69687	4.6262	5.56361	6.25205	5.80074	9.40298	6.0903	8.13524	7.68228	6.54123	19.2815	5.43445	14.3466	6.87662	6.64817	7.94711	5.19549	7.16238	5.68178	5.01284	6.65414
Ntrk1	20.9737	4.7349	8.62068	8.61087	3.97021	8.45921	7.86888	5.95301	6.15073	5.65601	18.2562	7.90703	7.28642	8.16849	8.30739	8.01459	6.77854	7.21247	6.62741	6.74561	4.97053	4.07424	9.3758	6.9792	8.7974	6.72511	5.91263	5.80727	7.81211	9.19962
Hk2	6.8944	4.79308	5.77102	5.29935	4.73426	5.73747	9.37302	7.22544	6.80693	6.13787	17.0916	6.04718	6.07371	7.19819	6.57358	5.6241	22.0352	6.11278	3.8699	7.03051	6.04985	2.89745	6.69187	4.91026	6.92106	6.31346	6.1281	5.94142	6.58043	7.64588
Nr4a2	5.66439	9.161	4.56126	6.55434	5.47018	6.27802	7.1676	7.5448	7.37995	7.12966	5.87366	5.66989	7.3068	7.4144	7.14797	20.3688	5.77468	6.63939	7.04651	6.39366	8.49251	8.7908	8.75486	5.416	7.17757	21.8003	8.01135	9.74081	7.31255	5.5396
Olfm1	6.93524	7.79155	4.37755	7.45665	5.50768	6.28276	6.29221	5.71848	5.15719	7.96238	6.05318	6.25442	6.26224	3.36443	6.30234	5.32157	5.80946	6.9027	15.1937	18.7955	5.51492	6.53098	5.4705	7.85734	5.91402	5.37749	5.66268	2.36705	5.69759	5.82296
Chek2	12.1458	11.0406	7.5319	5.29477	10.9075	11.2616	8.93774	7.20549	9.5103	11.0407	7.71493	4.36268	7.69915	7.85209	5.99919	6.8491	7.40967	6.92851	13.9873	7.37827	7.92445	6.08558	7.80547	8.64813	8.07536	9.00003	6.09794	24.4061	11.0937	11.065
Nos1	5.14243	5.26746	5.42601	4.86881	5.44205	7.57251	6.73232	7.2953	5.25885	9.26762	7.13953	5.40951	6.30301	6.06441	4.4728	6.25892	6.65926	6.278	6.14954	15.2258	5.91257	15.4484	6.85096	6.25277	7.40558	4.52385	8.32595	4.3706	10.3185	5.18069
Foxm1	11.2017	5.80898	12.1917	10.6995	8.85916	6.57201	6.66461	8.05378	7.13041	6.52148	7.39731	8.47561	8.10678	6.38081	7.44048	9.47269	7.23077	5.86497	18.0217	7.71764	6.27234	7.66089	7.01517	6.18381	5.45325	8.43239	9.37315	6.16644	10.5166	22.5362
Slc5a5	4.67494	7.17396	5.07204	7.33298	5.54518	7.27852	7.7915	6.19253	6.39565	4.93556	6.71604	6.02592	5.55908	6.11714	3.36125	8.76844	7.34507	6.91819	6.73708	14.4507	5.8889	8.64077	5.99395	7.20448	20.8249	6.53012	7.19255	7.65504	6.34357	5.21847
Mipep	7.46174	18.5458	11.8826	7.99712	5.49361	3.35713	7.28851	6.02287	6.07679	6.61037	6.78049	7.64133	7.38323	6.21206	6.6959	10.2017	8.84589	6.06116	6.01245	4.99426	5.46285	8.22819	6.89201	8.78147	17.7183	4.90517	4.37845	5.72505	7.05416	6.43217
Cd5 /// LOC100911215	5.16512	8.07797	4.95555	7.48413	6.27172	7.19791	7.99463	5.82826	4.05736	6.07705	5.83683	6.2863	7.16413	6.94506	7.6745	7.25083	11.2214	24.4098	5.20557	5.53894	5.56226	7.45929	6.50199	22.1743	5.83326	5.34282	7.82605	11.3895	7.97576	10.2953
Arfip1	10.2259	8.53446	12.241	7.84597	5.99048	9.9813	6.68879	9.10167	9.50105	6.6899	9.08208	6.44571	5.16164	8.2265	8.09997	6.42754	6.48533	9.37569	18.0217	8.24556	4.93266	22.7295	5.46537	7.09873	6.94956	7.89074	6.59784	10.6063	8.4624	11.1406
A4galt	4.92911	5.25851	5.32744	5.32225	5.15144	5.95084	6.05038	5.84323	6.07679	6.90978	6.96001	7.46598	8.32588	6.82905	6.40871	6.73999	4.94475	6.04051	6.59999	18.3807	7.7635	5.35418	6.70213	4.42292	6.74055	18.8797	8.30871	8.81043	7.31686	5.48766
Six3	5.12881	8.98647	6.59993	8.53301	6.26703	4.07787	6.20515	5.96299	5.72559	6.56826	6.09461	7.7051	7.72972	6.24898	8.1372	8.52046	10.133	6.58776	5.62076	14.3543	3.43203	5.35887	6.16843	7.40218	6.5648	5.11316	7.09774	8.12671	5.28846	15.4287
Plscr1	11.6283	13.3007	13.0878	9.60479	10.6872	9.10882	8.89421	9.07672	6.46497	8.81383	5.4962	8.53938	8.17302	7.87845	8.49353	6.4821	8.32408	8.13145	6.74491	6.73304	24.5544	11.6132	7.96969	10.0596	8.02311	10.235	24.4392	14.2932	11.8172	6.83832
Prss1	7.18034	7.68862	7.19137	7.17267	6.70296	7.14101	8.73944	6.46198	6.77921	8.01384	7.51239	7.15246	6.07371	8.17376	7.11074	6.58625	18.0993	6.32446	5.30349	5.87831	6.80726	5.97306	6.40449	5.02521	6.98281	4.35919	2.89598	19.183	3.81562	6.55968
Il18bp	10.1078	10.6065	10.0769	10.5392	7.7295	7.2311	9.20858	7.82424	6.54815	7.50392	6.96001	9.70311	8.94752	9.32864	6.1747	6.46722	10.8635	7.81652	9.23998	6.74142	6.13506	9.53626	9.10895	18.9376	7.72385	6.46512	22.8533	6.53426	9.25051	12.2787
Blcap	6.71738	7.65729	5.7755	7.14977	7.06389	7.41129	8.20744	7.42504	5.31893	6.95656	7.94049	6.2119	6.07371	6.14351	6.01514	8.87259	7.39477	9.23113	17.3871	8.45086	6.31021	4.3368	6.4866	5.97232	24.6394	5.85847	9.4852	5.0197	6.79146	10.0827
Grik2	4.93365	9.34449	9.56609	5.07492	8.09511	7.23585	6.67428	4.33127	8.23948	5.11333	6.81731	8.57126	6.81764	9.13352	20.6461	3.75436	20.6884	5.38483	4.46527	6.03334	6.13032	6.87323	6.88175	6.55621	6.45554	7.82141	5.05504	14.0508	10.9215	11.6318
Pi4kb	5.26498	7.33954	6.94494	7.68566	20.4417	6.96557	7.274	7.38013	6.91784	6.1098	5.32588	7.5138	7.30171	7.3933	7.07883	7.46409	7.41961	5.4158	15.7068	7.62128	7.91498	7.25769	5.63985	5.74703	6.91631	7.9514	4.37845	6.03229	4.59511	4.79816
Gabrd	7.42543	3.6832	4.95555	6.11463	5.73267	9.08985	10.3983	6.73144	6.97791	8.37407	8.22128	8.56595	9.06981	7.10854	6.71718	5.50507	5.92376	6.29348	5.52675	18.1	6.34808	5.45264	7.23071	8.25274	8.83065	7.55708	7.34338	23.0257	7.45036	5.19013
Rere	7.21211	18.1385	6.63578	7.02152	8.70447	6.21638	5.23303	7.54979	5.3559	6.07237	6.45826	5.89307	7.82653	5.63199	8.51481	11.5011	9.7752	6.33479	10.2466	9.55697	7.85817	18.81	6.60976	7.21368	4.96872	5.40782	4.79647	5.78131	4.97839	4.7651
Pik3c2g	7.68868	23.3568	4.12216	7.95131	10.3404	8.8338	6.73716	8.5877	6.19694	6.11915	7.65969	9.59683	5.26355	8.14212	6.32893	6.4821	22.2638	8.0695	7.51263	6.56125	8.0712	7.57181	7.36927	5.08038	7.38658	11.6909	4.54221	9.48549	4.3927	9.00599
Insr	6.33159	9.71147	8.46834	7.38794	7.27482	5.74695	8.88937	6.43204	5.45294	8.39746	6.28795	5.9037	7.55648	6.7394	7.90851	8.18322	11.778	7.32089	7.21102	17.7439	7.59308	7.91407	5.19338	8.35848	8.74989	7.69141	14.049	4.11529	4.8535	7.14529
Syt2	4.61593	5.36145	4.69567	6.07799	6.07016	5.62367	6.50985	6.67655	6.85776	16.5236	7.20398	8.53938	9.48763	5.67945	7.21179	10.901	9.89944	8.21405	9.90194	12.1337	7.11023	5.36825	6.4712	5.24589	6.77381	3.55322	2.52967	4.89853	6.37803	6.98472
Gsr	10.3348	6.97257	7.06143	6.99862	5.31549	6.3776	8.47828	8.86714	7.26442	8.81383	18.4173	9.86253	8.37683	9.48684	8.16911	6.65568	5.81443	6.84591	9.02455	8.66454	6.42382	6.57786	6.73806	7.17689	7.48634	23.5422	8.29578	11.0044	6.02058	10.4039
Anp32a	8.64182	5.0437	11.663	5.37721	4.89363	9.99552	5.23786	6.26238	7.32912	5.90395	6.73906	6.32881	6.83293	22.8602	8.69032	6.64576	4.86524	7.85266	5.68343	5.81547	6.24867	3.63353	7.10241	6.16082	6.18478	10.3737	8.85601	11.3073	20.2581	8.43928
Atp2a2	5.58269	7.3664	4.90178	7.23222	5.77017	24.6521	8.39606	11.1675	11.1231	8.29922	7.90827	7.67322	3.47506	6.60757	7.13733	5.21246	6.00825	7.76489	8.6642	7.67574	9.27833	8.70172	6.11711	7.24586	6.22753	6.06647	6.86934	7.59878	12.812	7.9009
Akap1	8.90053	9.51008	6.63578	5.40012	8.2873	7.12205	7.80601	6.43703	6.11376	6.3671	15.683	9.67654	7.39852	7.50932	9.61572	5.89688	8.38372	7.90429	5.55417	5.78614	8.78127	9.95822	17.366	8.19297	6.55055	4.8835	4.60685	4.78169	2.71744	7.36725
S1pr1	4.43438	6.33259	4.45372	5.95433	2.8968	7.63889	7.24015	6.11269	14.1268	6.26886	5.39033	6.1322	6.60364	8.00502	7.10542	5.75305	7.1115	22.3963	5.51892	3.95938	5.04154	6.77009	7.52322	4.97463	5.06848	4.26819	6.92967	6.12316	4.95686	6.90916
Adh7	13.2124	9.63091	12.7652	7.84139	4.62645	21.276	8.32835	8.65257	9.22379	7.68637	8.14763	8.63503	8.76408	9.60813	4.44621	6.70528	8.84589	8.39475	6.52948	8.88241	7.23804	7.20611	10.2636	8.80445	8.38888	9.51568	14.3075	13.8128	14.0696	22.744
Slc38a4	12.8356	8.01532	11.9543	6.27036	10.1482	6.75219	6.00202	7.20549	6.33096	6.05834	5.77699	4.57524	8.22397	9.37083	8.54672	8.11874	7.54385	7.61517	15.6402	5.4719	8.78127	7.2905	7.91324	7.77459	8.9779	5.77614	5.55925	6.58186	4.45299	23.9058
Gmeb2	7.64329	5.4599	4.80321	24.0097	6.45453	5.97455	6.49534	5.80331	3.76623	6.42324	5.56985	6.37132	7.8622	7.49877	6.39275	7.83109	17.5228	8.52382	7.96699	6.07104	5.86049	6.83573	6.16843	6.02289	5.71451	5.37315	5.11106	5.17115	4.61233	7.23502
Asah1	11.7554	9.91733	6.51928	8.53301	5.09519	6.44872	7.16276	7.53482	6.22467	9.02435	4.36842	8.23649	7.47495	7.90482	7.42985	9.24455	8.87074	7.15568	14.9743	7.23162	7.91498	6.98576	8.24168	6.53782	6.90681	10.4993	11.7606	11.6145	20.3959	13.5444
Mapk1	6.8717	7.84078	27.0046	4.8001	9.11228	6.05516	6.53886	6.63663	7.37533	5.11801	6.98763	6.25442	5.8699	8.26869	6.86609	7.98484	8.95025	10.9762	12.7456	7.29866	6.31494	6.50754	6.44554	7.46195	5.85226	5.52048	2.48658	6.08422	5.46073	8.86903
Flt1 /// LOC100911280	6.17727	4.65434	7.03903	5.08408	6.30453	3.12953	16.1489	5.63365	6.01672	6.64312	6.20969	7.03024	5.3145	7.54623	5.78113	6.15477	9.40248	8.07982	5.57376	5.53475	5.8747	6.60131	6.06066	5.05279	16.3075	2.67358	7.4899	5.43079	4.35394	8.29288
Prkg2	4.48885	6.29232	5.41257	5.12072	4.95457	5.41029	5.60543	5.47397	3.66918	6.03962	5.32588	5.97278	19.4033	7.27201	6.57358	5.97127	6.04303	6.57228	5.60118	5.99144	6.10192	5.6308	6.91254	3.93097	20.3357	6.96777	5.90832	6.04527	4.93963	5.29403
Ptprs	6.97609	11.5195	10.0545	9.12386	8.26386	6.8328	6.21482	6.46697	6.82542	18.1844	4.91159	9.6234	8.06092	11.1532	9.69018	9.8397	8.24457	7.77005	19.0675	9.0123	8.64399	6.38564	6.0196	7.39758	5.06373	6.27013	7.27443	6.17942	8.69926	6.15826
Mapk10 /// Mapk8	10.1078	14.7462	4.74496	9.19714	3.38898	5.92239	5.30557	18.1983	5.24037	5.52501	6.84493	6.33412	3.23048	7.40912	7.16393	8.50559	9.29812	6.39158	7.72414	8.47181	5.81789	5.2651	6.04526	4.79073	7.33433	6.83344	6.73574	4.54369	8.92321	9.33185
Prkaa1	4.89734	6.3505	9.67363	9.26127	8.91072	6.93238	6.48083	7.48991	6.42338	6.00687	7.80239	4.639	8.03544	8.31615	7.22775	5.97623	21.2152	7.68745	7.73981	6.45232	5.03207	15.7391	7.49243	5.79301	8.12762	4.53685	5.22311	4.82064	5.23679	6.98472
Sftpa1	9.2591	6.8204	4.71808	4.72682	5.11394	7.30697	5.51354	5.73345	3.39191	6.3016	5.67572	6.87082	7.50043	5.83238	4.17497	8.26753	8.34396	6.05599	5.24082	8.17852	10.2062	7.19205	8.03127	7.17689	21.6372	13.4156	5.09813	5.51301	4.38839	6.66358
RT1-EC2	6.79908	10.1232	8.12782	10.3697	11.4513	6.719	10.2097	10.6086	10.8597	7.94367	7.70573	6.12157	6.48644	5.80074	7.14265	8.31216	7.46434	7.68745	14.6061	5.11158	10.4523	9.96291	9.90951	9.79294	9.08241	8.54505	22.6938	11.7314	5.5727	8.65652
Fabp1	6.33613	5.16453	5.64108	7.69024	8.05293	10.9581	5.73118	6.66657	6.47883	23.017	5.74937	5.99935	9.39082	8.8013	6.6374	5.76297	4.95469	9.56671	5.96937	6.72885	5.9599	6.72789	7.03057	4.91486	6.71205	4.44585	4.41723	5.7337	5.42197	15.0604
Chrm3	5.82778	18.8143	5.72173	5.27645	6.0561	21.7644	6.50501	7.04082	7.43541	7.42438	6.31096	6.58919	5.95142	7.59369	4.02073	7.76166	6.71393	8.20373	6.36497	6.63248	8.12327	5.74801	5.97342	5.73324	5.58625	6.53012	3.80098	5.33126	5.39182	7.61755
Bax /// LOC681314	9.28633	5.96562	26.6775	6.69633	9.23415	7.19791	5.89562	9.90505	7.5648	6.42792	7.71493	7.05681	8.07621	4.47184	8.46162	5.43068	6.46048	7.24344	6.34931	6.63667	5.93624	6.3622	8.44182	19.4755	9.37217	12.8869	12.7992	14.3234	5.84832	9.28462
Atp7b	23.8376	5.59864	7.07487	5.0337	5.80767	5.65212	5.76987	4.01192	4.96772	19.8966	5.3581	7.04618	5.54889	6.95561	9.00942	10.2861	5.0839	9.4996	10.4151	6.23864	8.19428	4.84783	9.09869	7.76539	8.18937	4.60185	5.76611	7.5858	5.03007	5.25625
Htr2a	4.56601	7.25451	4.56126	5.35431	5.69517	5.46719	21.764	5.53884	7.30139	5.60922	6.72985	4.13418	20.6415	5.72164	6.66931	6.28868	7.09659	7.17116	4.62195	7.02632	6.31021	5.7949	5.50642	8.15619	4.3797	6.0188	6.07208	6.5083	6.83883	7.06973
Prl3d1	6.85355	6.37735	8.07853	9.27959	5.84986	5.81333	4.66233	7.34021	5.17105	5.28175	7.58144	8.06113	5.51832	5.99585	22.1991	5.21742	9.72054	6.39158	8.12366	14.0024	6.86407	9.14243	6.2608	5.416	5.4675	5.63315	7.13653	6.47368	9.18591	5.15707
Bglap	9.29994	5.7866	4.78081	5.55126	5.59674	8.98554	6.9016	7.70448	7.06109	6.63844	6.46287	7.98673	5.69665	7.48295	6.04174	6.78959	22.8353	7.54289	4.16759	19.2355	7.33272	7.66558	7.28203	5.01141	6.57905	11.4266	5.33085	10.9957	9.02226	5.31292
Ahr	12.999	10.978	12.6712	20.6065	10.931	9.17995	5.69732	9.2813	7.06572	8.00449	9.86922	8.40653	6.69535	9.44465	8.75414	10.663	9.48697	23.6974	5.96545	8.75672	6.21553	7.92344	7.06136	9.0987	4.99723	10.0573	11.7304	11.7227	5.27985	7.57504
Dlk1	5.07889	6.33259	6.32213	9.01393	10.3169	9.18943	21.6769	8.63261	6.7561	7.0548	8.3962	6.14814	9.4163	7.97338	16.5456	5.68362	5.80946	6.26767	3.54088	6.43556	6.33861	8.20475	7.01517	8.42285	5.70501	3.72221	9.2137	8.90563	6.22299	8.60457
Cntn4	7.00333	4.07255	7.18241	5.7986	5.61549	6.80435	7.30786	7.03583	9.41325	7.27	7.77017	6.58388	4.86101	6.63393	6.80759	6.44738	6.18715	6.14892	6.29839	9.07095	6.90194	5.38231	9.32962	19.6043	10.8067	5.93214	6.23153	5.4481	8.74233	22.5362
Pde3b	9.0367	4.7349	5.71277	5.5421	5.73267	6.46295	5.5087	6.97096	6.58974	16.4487	6.19128	7.21091	7.13865	7.73607	6.34489	3.46671	5.70013	6.63939	7.19927	5.21632	20.4833	7.99377	5.97342	6.10565	5.13973	11.392	7.95102	4.34896	10.0171	7.77339
Ar	13.5437	5.73737	10.6997	7.91925	7.44825	7.0936	6.76618	9.94497	7.73116	6.33903	5.4962	7.15246	7.02655	8.61673	6.02046	9.70579	9.24843	6.31414	4.86871	6.72885	5.41551	8.47668	5.6963	20.2525	9.32467	11.249	5.78765	8.8061	21.1969	4.69898
Trpc4	7.82031	6.01037	5.68141	4.75888	7.18107	5.41977	5.84725	6.98094	6.10914	7.32146	6.96461	7.43409	5.21259	7.54623	7.42985	9.73555	8.91546	5.82367	10.9595	19.0385	8.34103	8.31727	9.09355	5.75163	8.01836	5.8888	6.64093	8.24355	5.23248	7.63644
Mmp9	4.92911	6.87411	3.27532	4.8001	6.32797	7.19791	18.8379	5.73844	7.61101	5.81974	6.59176	6.22785	6.01257	7.2351	6.69059	5.10831	18.9888	5.71525	8.82871	6.28892	10.2677	9.89258	6.53278	7.45275	5.69551	5.77181	5.55925	4.37492	6.757	5.29875
Cybb	10.9475	4.94077	11.4748	9.27501	6.14047	7.27852	6.74683	9.77032	4.52409	20.1726	8.64017	8.09301	6.15015	5.72691	7.29157	7.99475	7.59852	9.99523	6.66266	6.23445	7.31852	6.07151	7.98509	8.22975	8.95415	11.0886	12.5837	6.07124	7.31255	22.7251
Casp1	12.8402	6.58769	14.3379	11.0247	8.34354	3.93088	7.44328	5.81329	7.23208	7.58812	6.55493	6.72735	7.83672	7.94174	7.91382	6.90366	7.59355	9.97458	7.0896	7.46625	10.3292	9.45656	9.01658	18.533	8.58364	13.4979	9.98941	8.8364	12.4589	25.6815
Cd2	8.67813	7.30374	6.19668	7.3971	8.0248	5.81808	5.75052	6.6516	5.67938	6.54955	6.98763	18.8164	4.78458	5.6689	6.04174	20.0861	6.18218	7.58935	7.28153	9.12961	9.45821	3.13656	6.68161	9.82053	8.70714	4.69718	5.63251	4.97642	7.85087	7.24918
Cdkn2b	9.30902	6.8204	5.13029	8.26735	7.52794	7.69579	8.58468	7.02086	6.48807	5.5063	8.94398	9.44805	7.10808	9.58176	6.57358	5.41084	5.44171	7.56354	8.17067	8.20366	6.16819	2.98184	7.65152	5.64129	3.69567	16.2061	5.04642	6.64677	5.80525	21.2895
Cdkn2a	6.50406	7.25004	6.79708	6.93908	5.46549	6.66684	6.4373	7.60967	5.58695	5.0759	5.71715	5.96215	6.3081	7.07162	6.44062	5.34141	5.77468	20.6926	4.20676	7.17297	7.1623	6.23561	5.9067	17.8434	7.46734	4.50218	6.54612	4.12827	4.38839	4.96345
Nt5e	7.69776	7.28136	7.24514	7.9559	6.3889	7.06515	9.16021	9.27631	5.11098	8.12612	6.6608	9.00168	6.90426	9.0597	20.1249	10.7671	11.8972	12.4063	9.07939	6.29311	7.82504	7.59056	7.17426	5.0298	6.93531	25.0762	5.42997	6.35251	10.9731	8.06147
Hck	5.2559	4.97657	5.09445	8.56965	8.51698	6.28276	6.99833	8.42303	7.31526	6.5823	7.6643	7.8592	7.52081	6.69721	7.85	8.43615	7.98615	6.26767	8.1785	7.82658	9.23572	9.06273	7.40519	5.039	19.8796	11.4916	22.6938	9.32971	9.33664	13.2374
Il7	8.49658	8.30174	6.12051	18.7149	9.38883	5.78963	6.37443	5.8083	6.27088	3.94377	7.25922	9.17173	8.5246	8.41107	6.64272	7.19131	9.39254	8.96266	8.18242	6.36852	21.1224	9.0768	10.9872	7.84355	7.30108	5.30382	9.5283	10.4375	9.47445	12.1937
Epb41l1	4.48885	5.65682	4.39995	5.29935	7.58888	17.3215	6.25351	5.39413	6.13687	6.37646	6.32477	5.68583	7.87749	6.5812	7.47239	6.2986	7.11647	6.31414	7.19927	5.72329	6.8262	6.70914	3.33054	6.24358	6.34154	23.1999	6.43839	12.8046	4.81044	7.39086
Met	6.8717	8.78508	9.4496	6.47647	7.32638	7.44922	7.23048	3.85224	7.01026	8.24308	9.03605	8.37996	7.93353	8.8804	7.48835	7.17147	8.6968	9.74741	12.6281	7.72183	5.57173	5.85116	6.66108	6.27576	7.18232	10.586	11.7304	7.9666	7.94131	21.7617
Tgfbr3	7.08502	7.54093	7.06591	5.0337	9.88569	6.8897	6.31639	7.61965	6.07217	5.39402	6.75747	7.5882	6.78707	6.86069	7.95637	6.46722	6.18715	6.23669	15.0292	6.80007	5.30663	5.36356	3.35107	16.7767	6.15153	9.39002	8.08031	4.45714	2.66576	8.97765
Dnm1l	10.2758	5.72395	23.9757	7.73604	6.97483	5.79911	6.74199	7.23043	7.59715	7.55538	6.78049	23.1047	9.20229	8.75384	7.45644	6.21428	6.7189	4.88403	7.57921	6.48165	6.37175	5.31199	3.98741	5.50796	5.65751	11.7993	8.25699	8.34308	5.65452	9.40741
Gucy2d	2.4237	5.04817	5.10341	7.85971	6.78265	6.15	5.65863	6.49691	14.7691	6.45599	18.3805	7.04618	6.02276	8.02084	4.58981	5.26702	6.30642	7.95591	6.05162	8.22042	6.97295	5.91211	6.38396	5.50796	7.16807	5.71114	8.99392	10.9525	10.8138	7.82062
Cdh17	10.0715	18.1788	8.54451	11.2903	11.2591	7.18843	9.67771	10.5238	10.929	8.65476	7.71033	8.94854	9.31948	7.87318	7.39794	7.11196	10.302	8.03336	17.7945	6.9551	7.35165	9.74724	10.4894	8.95158	9.41967	14.8628	13.7516	12.8046	8.47532	11.882
Kng2	4.85195	5.73737	6.237	5.12988	6.03266	6.4345	5.35877	6.03285	6.22467	7.82204	6.6516	6.97179	6.65459	6.29644	6.46721	2.87652	5.47153	6.17474	16.592	6.77912	5.2735	4.65561	6.34804	6.12864	5.4675	7.9774	6.25739	4.5134	4.79321	15.3909
Inhbe	8.24695	5.49571	7.56326	5.73447	5.26393	7.46345	5.83274	7.44001	21.5299	5.10865	7.54922	6.87614	6.71064	7.47768	7.54685	7.85589	7.47428	8.7768	7.66147	2.99991	5.92677	5.82303	6.31212	6.5792	6.21803	10.313	5.38687	11.065	17.3813	6.80054
Avpr1b	6.57214	4.35897	9.19868	3.08709	5.15612	5.1163	6.53403	6.64162	5.92892	6.74604	14.3803	8.27368	3.81136	6.95561	7.62663	6.88382	7.11647	5.76688	4.51228	5.04873	5.83209	5.73395	7.07676	6.69414	6.04702	4.56718	4.68011	5.28366	14.2677	6.00714
Xiap	10.2259	8.70452	10.1262	7.22764	10.7482	7.73847	7.81568	7.34021	7.36609	3.33091	6.15906	6.06312	6.49663	7.38803	6.60017	8.37664	9.30309	7.7494	10.1722	5.52637	8.03333	5.26979	5.9375	9.8849	24.2973	5.9018	4.61978	7.13143	14.315	8.75569
Ankh	6.90347	9.72937	6.52824	12.0781	8.70916	7.42551	9.41171	6.34222	6.68678	4.93556	7.13033	6.66358	8.93223	6.72358	5.10037	6.88382	9.12419	16.0822	6.09862	6.00401	9.53395	9.38623	25.7155	7.95849	10.5787	4.55852	5.99451	6.21836	4.18598	5.04845
Syn1	5.17874	5.49123	6.33109	5.43676	5.09987	5.87023	6.00202	6.91607	8.21638	7.78461	5.17858	6.73266	6.01257	4.45075	8.63181	5.95639	5.99334	7.17116	14.2497	6.01239	7.8345	8.55169	7.88758	2.87811	7.51959	6.19213	7.96826	18.218	4.95686	5.42154
Grk1	8.36496	7.25451	10.0186	7.29176	5.93892	9.19417	8.83134	6.96597	8.25797	5.91331	5.62048	6.27036	8.23416	6.0855	3.68035	10.415	9.33788	6.22637	7.40295	8.56399	6.90194	5.91211	9.18593	5.32865	9.55743	4.54552	13.924	13.7522	7.937	4.28339
Dio1	5.8414	6.82488	4.14904	6.5406	16.7293	4.90293	3.24041	9.00187	9.62583	10.1518	6.6562	7.77949	7.35775	8.53763	6.46189	5.86216	6.67914	7.25893	5.86753	5.94116	7.96705	8.32196	8.35971	5.68726	4.4652	5.71981	7.73986	13.0858	6.29189	8.86431
Cyp21a1	9.26363	6.91439	5.01828	18.7744	6.22016	9.71576	9.06832	7.39011	5.86422	7.67701	7.17636	8.41184	5.84442	6.77104	8.44035	17.2889	7.31028	6.63423	6.05945	8.73158	8.98009	5.13852	8.03127	8.901	6.37954	4.9485	6.40822	5.46974	8.20401	7.13112
Senp2	11.0837	7.17843	10.0007	9.51318	5.84517	4.44298	7.8447	7.13563	6.79307	5.98816	7.15795	7.4766	7.04694	20.4819	7.97233	9.53717	6.99223	6.07665	6.28663	5.91602	8.35996	9.6019	6.30699	17.3974	6.62655	7.20609	4.83956	6.82852	5.27554	3.56556
Gabrg3	6.55853	6.99942	5.06308	5.41386	5.31549	6.77116	7.49648	5.87317	16.9781	5.1835	19.0526	6.99836	6.16543	6.21206	8.27548	5.91671	4.40307	5.94757	4.3086	6.51098	6.80253	5.79958	4.95219	8.30331	5.82376	5.08716	4.78785	5.56494	6.50722	5.601
Galnt1	6.21812	9.51903	3.65169	5.62455	6.73577	7.79063	8.13005	5.62367	6.97791	6.36242	7.68271	7.31187	7.3068	7.87318	7.61067	6.83918	6.07782	22.2518	4.79429	6.68276	22.9497	9.17994	9.21672	6.42288	7.17757	9.91434	8.42076	10.8962	12.2048	9.2374
Nr1i2	5.63262	5.49571	6.23252	22.6997	6.37953	7.34491	8.91839	6.27735	5.43446	7.73315	5.24763	6.18534	6.04314	8.31615	7.70109	6.40771	6.212	10.2792	8.78562	15.9255	9.65703	8.96427	5.98368	7.99067	5.30124	4.63218	6.92105	5.34425	4.72	8.57623
Adora3 /// LOC100911796	10.2077	6.16701	8.06061	8.49636	8.6951	7.47293	10.3403	8.04879	8.85872	6.194	7.33287	7.76355	8.35136	8.84876	8.02019	9.72067	24.2914	8.4722	8.93055	5.5138	5.3019	6.80291	6.15816	7.70102	7.47684	7.73041	24.4392	13.7825	8.74233	13.261
Cyp2a1 /// Cyp2a2	5.06073	9.161	4.88834	6.72839	6.43109	5.53357	5.89562	6.22247	5.47142	16.7669	8.08319	8.84758	8.15773	6.9767	8.37653	6.65568	5.56098	6.06116	6.86242	6.2135	8.03333	6.92481	9.96596	8.99296	5.70976	12.5966	21.694	7.90602	9.34525	9.47825
Mecp2	6.25897	5.33012	13.872	6.307	2.8968	5.64263	7.0612	6.05281	5.91967	6.90042	6.76207	6.58388	18.8784	6.15405	7.14797	6.79455	7.92154	5.85464	4.38302	3.07533	6.90667	5.85585	6.50713	6.64357	6.61705	4.74051	6.13241	4.31434	8.31598	5.78046
Dhrs9	5.57815	5.53598	5.36776	5.40928	16.734	6.65736	5.67314	6.61168	5.45756	5.54841	5.58366	5.82931	3.50054	6.69721	6.99374	7.55832	5.90885	6.76846	17.0973	5.66044	5.55279	5.2276	6.83556	5.68267	5.61	7.51808	5.09813	5.31395	4.50898	6.05437
Proc	5.30583	6.48923	6.22356	7.77269	8.26386	22.1058	5.37328	9.70046	6.58974	7.53198	20.01	8.84227	5.54379	5.94312	7.16393	6.74495	3.34454	7.09888	4.90397	7.21068	5.88416	6.49347	8.27247	5.88036	7.7381	9.34236	7.77433	6.07124	6.27036	5.37431
Syt9	6.08649	5.54941	4.89282	7.92383	7.58419	7.23585	6.57756	6.99092	6.65444	15.5271	7.79779	5.93027	6.81255	6.71303	8.24357	6.34819	5.16838	6.12311	6.61565	18.1503	7.63095	7.20142	4.17729	2.77697	5.33449	6.20946	6.41253	5.17115	5.71481	4.81705
Hnf4a	8.68721	7.22766	9.10459	8.56507	7.26076	5.51935	5.78922	10.0547	7.91138	8.56588	8.32255	8.51812	7.61252	8.98587	7.36603	9.87937	5.02924	10.5838	7.67322	15.1755	6.55163	5.56047	7.07676	5.4298	3.37265	5.9928	9.54984	5.87651	9.707	19.6791
Ccr5	12.3137	8.45838	14.0109	9.33455	9.65601	7.0936	4.5656	9.67551	8.24411	8.01852	8.05557	7.40221	8.75899	8.21068	8.64245	8.19314	8.72165	9.21048	13.1216	7.60871	10.1352	9.8035	7.95943	8.35389	9.43393	12.6182	12.2002	6.51695	12.4589	25.6815
Agtr1a	27.4913	12.6518	9.1718	11.1575	10.3497	7.57251	7.21113	6.42705	6.6914	8.03256	8.35477	8.10895	9.45196	7.08217	6.50976	11.0945	26.8309	7.07823	6.66266	6.82521	6.38595	5.56516	9.88385	8.86422	7.18707	13.8402	14.6652	12.93	11.6708	13.1335
Rtn4r	8.68721	6.14015	11.5152	5.83524	5.51705	6.15948	9.23276	7.2953	20.601	7.06416	17.0824	8.33214	7.01127	6.39136	5.27056	6.96317	4.06016	5.69976	6.19263	7.45368	3.90068	5.60267	6.83556	5.24129	8.19887	4.66251	6.83917	7.30885	4.84919	6.21021
Pgc	6.8717	5.58521	7.15553	4.85965	7.10607	6.60994	6.39861	7.31027	7.71268	5.9367	8.44223	7.56694	8.25454	9.27063	7.31816	8.08403	6.38594	7.05242	6.59999	16.1601	6.883	4.5759	9.21672	6.90104	8.01361	24.8725	14.2989	10.9265	9.75007	6.95638
Aplnr	8.19702	5.03922	6.04434	6.12838	19.7105	5.85127	6.11326	6.42705	19.8154	5.23496	8.96239	8.91135	9.04433	11.1532	8.79668	7.64759	7.02702	8.03852	4.59845	6.666	6.46643	6.12309	6.4866	5.87117	5.62425	6.14446	5.13261	2.54879	5.34876	9.33185
Crh	6.74462	7.63044	7.98444	6.70091	16.9965	5.74695	3.34198	5.71848	5.06939	5.44548	5.80001	6.23847	6.40492	6.2437	6.08428	5.51995	5.04414	5.50357	6.62741	7.49977	6.72205	6.35751	6.035	6.04128	18.3691	4.37652	5.03349	5.57359	2.20927	7.8584
Pts	5.44199	8.77612	5.96368	4.81384	8.2498	6.49614	7.07087	6.36218	6.58512	6.85832	7.36969	7.71041	7.78067	7.58314	7.19052	7.51368	20.4648	5.90111	6.83892	7.08079	8.71973	9.22214	6.24027	5.74703	5.69551	23.2346	7.08912	8.41665	5.48657	5.2043
Rab3il1	13.4438	6.70405	13.6793	5.49172	6.33734	5.41503	6.86291	6.79132	5.64703	6.32967	6.69303	7.83263	7.17432	6.98725	21.6726	3.83867	5.73492	2.97379	8.86396	15.0792	6.14452	7.36083	9.41686	7.56769	7.45309	11.3313	9.01116	4.47878	4.48744	10.0827
Klrd1	4.62955	6.0417	5.30952	4.823	6.15454	5.30123	3.86431	6.39711	7.01488	7.28404	6.02556	5.9037	7.83163	6.37026	7.74895	8.14354	7.48919	9.19499	8.49969	6.67438	7.07236	4.8619	21.0353	7.22287	6.47454	14.8628	9.4852	9.42058	24.7585	10.98
Stx3	6.85809	6.49818	4.88386	6.56808	5.81236	6.00774	5.57641	2.74946	5.02317	6.7975	7.41573	5.68052	6.56797	5.77437	7.73832	8.92714	4.89506	6.33479	18.0217	5.02778	7.26171	6.31531	6.67648	8.26193	5.40099	18.2037	8.11047	4.50042	4.33241	8.76041
Csnk1a1	13.1851	7.67519	13.9616	6.00471	6.92327	8.02297	6.56305	10.2593	9.49181	7.85478	7.2362	8.84227	7.58195	6.12769	5.47798	8.21793	10.292	8.85941	4.96664	16.5037	4.94686	6.41846	23.2522	7.28724	4.50795	8.71838	6.83055	5.66879	11.0636	10.7628
Fhl2	5.35121	6.22966	5.7755	7.61696	7.10139	6.46295	6.94029	6.29232	7.39382	5.93202	8.5435	5.80274	9.42649	8.92786	8.05742	9.26439	6.84314	6.90786	6.02028	5.83223	7.24277	24.7502	8.33918	9.13088	6.37479	6.40445	5.1283	9.0744	6.56321	25.6484
Fhit	26.0616	9.12073	13.1237	7.38794	8.1748	6.17845	6.57756	7.47494	6.24778	6.38113	6.35239	7.8964	8.17302	8.56927	6.60549	4.85042	5.30753	6.14892	19.2673	5.5976	6.00724	6.10902	6.56358	8.86422	7.57184	5.35582	6.78746	8.90563	5.72773	5.53488
Arl6ip5	9.2591	5.49123	5.52459	6.73297	6.44984	11.3374	9.7551	11.3072	5.24037	9.27229	5.45937	9.07608	8.94752	7.83099	6.99374	7.65751	7.32022	6.60325	14.4808	6.25959	15.243	5.64018	8.79078	8.03665	8.21312	13.9095	5.86953	11.8352	9.8362	13.5444
Leprot	6.90347	7.71547	23.5769	6.11463	7.80918	6.84228	6.53886	5.43904	4.29303	6.83025	7.59525	7.79012	7.73991	8.15267	7.55217	9.00154	23.6603	6.83042	7.3912	6.26378	5.9457	5.28855	8.72406	7.3654	7.6906	5.42082	6.06346	4.50907	5.27554	8.20315
Magi2	4.38899	2.84631	5.51562	8.20781	7.68262	6.99402	9.1457	6.77136	4.99083	6.87235	16.7648	6.2119	5.8699	6.41245	7.33943	3.08978	6.1474	7.53256	6.8115	6.335	15.2666	5.1057	6.38396	5.26428	5.80001	4.27686	5.24035	4.15856	4.99562	6.13465
Wdr7	10.4437	4.68567	7.12416	10.6995	9.21071	6.96083	7.43844	6.22247	8.16093	5.11801	5.58826	5.87713	5.92085	8.04193	8.71691	7.86581	8.78128	20.8423	8.89529	5.44676	7.46053	5.81834	26.0747	7.34241	5.648	4.25953	7.73555	9.19124	5.48657	7.2728
Prom2	5.9004	5.10635	5.03172	5.7986	5.81236	8.14151	6.17613	7.91905	5.27734	5.81974	7.2408	6.31818	4.51452	5.81128	6.90864	5.06367	20.2809	6.75814	6.72924	5.52218	8.64873	8.77205	5.61419	7.61827	6.58855	20.7906	4.65857	5.53465	5.68036	4.80288
Kcnq2	6.45867	9.08492	2.61667	6.1467	8.71385	5.50512	6.51952	8.75736	6.83928	4.74375	19.0986	7.19497	6.24186	5.87456	6.50976	5.68858	5.48644	7.37768	12.6555	6.36433	8.35523	4.84315	6.37883	6.0045	7.54809	6.69911	6.65386	4.34031	5.80956	5.66239
Hipk3	8.43758	6.49371	25.405	11.2903	9.26227	9.86749	7.63674	10.2144	7.05185	6.24547	8.1016	6.48291	7.36795	8.25287	7.91914	8.94202	6.45551	11.9261	9.87844	7.36989	5.37764	5.40576	5.51669	18.1055	5.62425	6.66878	5.36532	8.58974	6.64073	9.11933
Epha3	8.92777	11.3584	6.56409	5.1482	10.3544	9.47867	6.72749	6.1576	7.81896	5.40806	8.83811	7.40221	22.9242	7.17709	6.34489	6.01094	5.3125	7.74424	3.00818	8.59331	9.67597	9.59721	4.77258	6.98839	6.13253	4.24219	7.60195	9.14796	20.706	9.3224
Slc15a1	8.73714	14.4777	8.84023	5.80318	4.68738	5.76592	5.75536	6.5019	5.19416	5.16011	7.28684	6.83894	7.59724	5.9062	6.85546	5.68362	6.03806	6.61874	7.17969	6.39785	3.38943	6.80291	6.65595	18.1744	3.30615	7.05877	8.23976	8.07911	4.38839	8.43456
Mertk	4.23014	5.56731	23.1602	5.32225	6.63265	5.02621	7.05636	7.13563	5.39749	6.94252	7.94049	7.52443	22.2618	7.73607	8.38185	6.86398	4.60185	6.20572	6.67441	6.76655	6.56584	5.33543	6.66108	5.02521	7.25833	6.53012	6.26601	7.09681	6.01197	9.29879
Vav1	12.1458	6.46685	5.80686	22.6951	5.78892	6.33492	7.66092	7.76935	7.18587	6.6244	8.08779	7.4766	7.90296	7.53568	7.95637	5.01904	4.81057	7.09888	16.4549	6.74561	7.65935	7.89531	7.65152	5.15394	7.53384	9.26003	8.23545	10.0697	10.4563	12.3354
Unc5a	5.80963	5.33907	5.67245	6.95282	6.87171	5.62367	6.68396	5.76339	20.1158	5.16947	6.13144	7.09932	3.37315	8.24759	6.01514	4.90001	5.16341	6.6239	6.09471	6.49841	19.4892	6.08558	4.78284	5.94933	4.77397	5.82381	7.07188	5.2577	7.07569	5.50182
Adnp	6.83085	7.8005	3.65169	9.21088	6.16391	7.86649	7.71896	7.5448	7.82358	9.26762	7.61366	5.63801	5.67627	6.44936	6.00983	6.73999	6.68908	5.93725	15.3229	4.92722	19.2383	6.04338	8.06206	6.85046	5.458	6.46079	5.68853	6.35684	4.85781	6.78637
Tnfrsf11b	11.6283	10.6065	9.71843	10.8552	8.32479	7.57725	5.82791	7.98392	6.81155	5.71214	8.43763	8.52875	8.53479	8.03138	22.0289	8.36672	7.83209	4.32128	5.7461	7.37827	8.81441	9.65347	6.91767	7.3562	6.35579	6.66011	23.4221	5.8592	11.0248	6.64941
Nab1	11.5149	5.96562	9.14491	5.81692	5.53111	6.15	6.92578	18.1385	6.75148	5.98816	6.98763	6.33944	7.03674	6.481	7.99892	11.5111	9.97399	4.82208	5.44842	6.96767	6.75992	8.20944	8.18523	6.85966	8.38888	7.18009	7.30029	4.99806	8.88014	24.4394
Stxbp3	4.55693	5.56284	9.77668	7.29634	7.81856	9.70628	8.59435	7.57474	5.93816	5.32853	7.82541	6.20659	6.96541	20.5662	7.72236	9.88929	8.45329	5.94757	11.03	2.99153	25.1083	11.3038	6.63542	10.7676	6.39854	12.6832	9.69206	11.1126	14.0265	6.98
Hcn3	5.89133	2.98057	5.0362	5.74363	4.86082	3.09634	7.30786	6.59671	6.10914	6.15658	6.80811	7.23748	6.38453	7.09799	6.56294	6.18949	7.99112	5.60167	12.2482	14.9954	7.28065	5.42451	6.45581	6.29875	5.91877	4.9875	4.70166	4.55667	5.34876	4.8076
Top1	27.2054	5.20929	7.37956	7.12687	7.30294	7.51087	6.78552	8.55277	5.80415	6.35774	7.41573	9.90504	7.1998	8.99641	7.59472	5.53979	21.2649	8.50834	7.12877	5.14929	6.04038	5.41044	5.64498	9.0941	6.5553	8.25906	11.6012	10.4202	10.8267	10.1583
Cyp2a2	10.0171	9.161	12.6263	7.24596	9.82007	9.55454	7.87372	7.25538	7.94835	3.25138	7.40192	7.5138	7.82653	7.22983	8.0787	7.55832	8.3042	8.28117	12.679	7.81401	7.18597	8.68766	8.0518	9.47571	6.68355	10.4777	22.1637	12.5622	7.87671	12.4865
Bcmo1	3.88065	6.06407	4.79873	5.42302	7.63575	7.21214	9.07316	9.29128	7.18587	9.0992	6.6562	6.83894	5.89538	7.60424	7.41921	4.67683	7.20095	5.49325	5.29957	6.95091	5.99304	19.1053	5.75788	6.87805	6.7073	19.404	4.50773	9.2648	8.97919	9.64826
LOC100909929 /// Ttpa	6.73554	8.25699	6.9539	8.53759	3.09367	9.23685	6.86774	11.6615	11.405	11.4056	4.93461	7.3225	7.638	7.21401	6.73845	5.88696	6.376	6.722	6.97993	13.3571	7.53154	24.9237	11.3156	8.96997	9.14416	6.8941	12.2605	6.0972	7.70875	5.61044
Capn5	5.17874	7.67072	8.24879	5.26729	18.773	9.12305	5.42165	6.47196	10.1157	9.83836	7.64128	4.73465	8.12206	9.04915	5.79177	9.27927	8.52286	21.2657	6.29447	5.61017	6.1966	6.32	7.6156	3.52638	6.48879	7.94707	8.81292	5.94574	8.92321	6.92805
Angptl2	23.8376	9.23708	4.39547	6.24746	8.33886	11.2758	6.20031	10.7334	9.14985	8.97289	9.19716	6.52011	6.38963	7.03998	6.2332	9.29911	5.34729	7.81135	8.31559	16.9855	5.0226	5.69644	6.13764	7.05276	7.43409	6.04047	6.07639	9.25615	6.96803	8.85014
Cry2	5.36483	7.65729	5.7531	7.7223	7.43888	6.00774	5.76503	5.70351	8.221	5.02444	6.03017	7.24279	6.10938	7.93119	8.79668	7.14172	4.93481	19.5981	5.91453	6.25959	7.41319	11.8101	8.42642	6.60219	20.8249	9.29469	6.3996	9.29942	6.8173	6.7722
Ust5r	11.0701	18.5861	13.1819	8.4643	9.47789	11.5698	8.56533	7.30528	9.63045	10.0115	5.57445	8.07176	7.72462	8.41634	8.66904	9.05113	8.72165	8.23987	10.3798	7.10593	24.971	7.56243	7.73876	10.3079	6.94481	13.8229	7.96826	12.93	14.0696	13.1619
Picalm	5.31036	5.75528	5.95472	7.87345	5.02488	5.84653	5.7602	8.09869	7.22746	6.04898	6.43985	5.62207	7.3068	5.76382	6.91928	6.95325	8.20481	3.83082	15.6324	5.65206	10.405	10.3474	7.57454	5.71025	24.2973	6.63411	4.78354	9.27778	7.70445	5.62933
Epn1	7.61152	11.1391	5.53803	8.43682	11.3669	12.1388	10.0163	11.6316	9.31159	17.7165	7.03826	10.176	7.76539	9.23899	7.40326	9.40822	5.5262	5.88046	6.62349	15.1923	8.3931	4.09769	7.04083	7.87573	7.47209	5.21716	7.24857	8.00988	4.53481	4.99178
Abcg5	7.93377	13.3007	11.0985	12.2155	13.345	9.52135	6.3309	10.3142	9.78294	5.56712	5.12794	10.9997	24.1675	9.30227	9.28598	8.15842	7.74761	8.42057	8.01791	8.83632	7.44633	8.35009	8.53419	9.46191	9.23917	5.71548	24.4392	8.64167	13.1436	11.0981
Hsd3b5 /// LOC100911116	14.102	5.7687	12.6263	6.71465	9.47789	9.12305	6.73716	9.6805	5.97513	8.33664	7.9635	7.08869	6.39982	8.9595	8.55735	6.11509	7.75755	8.0695	5.13115	8.34193	23.5035	10.0801	7.52835	7.51252	7.69535	11.4873	22.1637	12.2593	13.3504	10.0591
Pfkfb1	5.19689	8.74032	5.77102	7.20931	9.86226	9.42177	10.5434	7.56476	5.88271	23.2462	5.45937	6.74329	6.99089	6.9978	6.24384	9.58676	9.14903	8.95234	8.47619	5.83223	23.5035	7.17329	6.98952	9.02974	7.41508	10.469	9.58001	5.64283	11.0119	5.00595
Fzd4	6.09557	5.84478	5.34536	6.43983	16.5465	6.82806	8.18325	6.20251	7.57866	7.94367	5.59747	6.36601	16.1626	6.60757	6.95119	7.64263	7.53391	3.28356	6.2553	8.29165	6.97768	6.66694	7.0511	7.5539	6.54104	4.64518	5.91263	8.31712	6.34788	3.69779
Pgm1	7.67506	7.39772	6.79708	5.97265	8.85447	7.10782	6.11809	7.72943	8.89106	5.22093	17.644	6.69015	6.36415	6.16987	7.59472	6.6408	6.5549	5.99404	3.07085	6.15903	19.1957	7.14516	5.84512	5.64129	7.7951	7.36642	5.9471	4.80766	6.0981	8.75569
Efnb1	4.90641	9.70699	18.1061	4.91461	7.99199	7.27852	7.27884	5.67856	5.40211	5.79635	5.59747	7.0143	5.65589	6.06441	4.88232	6.15973	7.72773	7.32605	6.19263	9.66172	5.45812	7.59056	7.29229	9.19065	20.9864	3.03323	4.99902	4.80333	4.74153	6.89971
Slc16a8	4.60685	5.4599	14.32	5.23065	15.8809	5.85601	3.08081	5.51389	4.76901	5.69343	6.32937	7.22685	6.70554	5.99585	7.07351	5.98119	6.00825	5.71008	5.22124	3.3728	6.5185	6.86386	6.45068	5.41141	6.21803	4.9615	4.4948	4.76006	4.80182	5.29875
Acot12	6.78093	9.22366	8.55347	5.24439	8.05293	7.4919	7.11924	6.40709	6.57588	6.70393	6.61017	6.89208	21.3548	8.47435	8.24357	7.02269	5.39202	5.46743	5.18598	12.1337	8.90435	8.70641	10.1404	6.50104	5.52925	6.62978	10.1101	11.9088	11.912	6.71553
Asz1	7.73861	10.4186	5.50218	10.9376	9.67007	8.33592	6.38893	18.8321	7.81896	5.33321	5.19699	9.79876	9.02905	9.76106	6.57358	2.92116	5.81443	5.18348	5.79702	5.49704	8.715	9.11899	3.68977	5.36543	7.02082	5.18249	4.9473	7.30885	16.2874	7.78756
Dao	10.1351	6.8204	21.359	10.6399	7.1717	7.25481	7.43361	4.24645	8.19327	6.42324	8.99462	10.2664	8.48384	10.2568	9.22748	8.52046	8.77134	7.80619	7.21886	5.64787	7.4416	22.7201	8.32378	8.54699	8.36513	11.47	12.3381	6.0972	11.7182	11.2303
Aadac	9.3771	6.94124	18.935	10.6216	6.00923	9.23685	10.3983	5.48395	6.80231	8.7343	8.28112	9.11327	9.33986	9.71887	8.69563	6.49202	8.93037	8.68903	4.87263	5.6353	6.13032	5.17134	6.40449	6.28036	23.4708	10.6683	12.5837	4.10663	12.4589	4.73676
Prlr	14.0248	19.1947	12.6263	10.6582	10.0029	6.31121	6.7033	7.24041	5.7949	6.2174	7.65049	21.2448	7.94373	6.95561	7.59472	9.40822	9.53169	8.74066	10.4816	7.05146	8.48777	3.41786	7.53349	8.61595	6.76431	9.57202	11.9675	6.77659	10.564	12.7841
Ptpn12	7.16672	6.83383	7.28546	4.46116	7.36388	5.98878	6.68396	6.39711	7.42616	7.20919	19.3702	6.50948	7.09789	5.98003	7.36603	6.18949	7.23574	5.16799	6.23571	6.81264	6.97768	6.1184	7.3744	5.48037	6.49354	4.18153	4.51204	5.81592	6.89051	20.6897
Zfp260	6.69015	7.16948	3.36493	8.56507	5.32956	9.03295	11.1577	9.22142	6.62209	6.72733	8.58033	8.98043	7.23547	6.21733	5.98323	10.0182	7.3401	25.1378	6.54907	8.476	6.97768	5.53234	23.8218	4.66659	8.38888	6.18346	4.58099	4.73409	7.4116	6.20077
Amy2a3	6.82631	10.9332	7.18689	10.8735	10.8794	8.9808	7.45779	6.75639	6.19694	6.194	7.807	6.72204	9.05962	7.29838	5.55244	7.46904	18.0993	3.50556	5.80877	5.44676	6.80726	8.24226	10.9718	5.48037	8.19412	5.48148	2.89598	13.7003	5.1808	5.11929
Tgfbr1	5.76424	7.74232	4.59262	6.77419	5.47955	6.07887	6.4905	4.13667	8.82175	5.90863	6.3708	8.48624	6.45077	10.0195	6.84482	6.79951	20.3505	9.50476	5.9302	3.42308	5.56226	6.46065	7.88245	4.8505	9.61918	6.61678	10.7651	4.73409	7.2781	18.9329
Cds2	22.3625	5.61207	7.37956	7.6307	9.62789	16.4348	7.62223	6.951	6.18308	5.41274	7.16715	7.59882	8.62141	7.79408	8.15847	10.5638	9.22358	7.45512	4.43394	6.21769	8.28895	8.12036	6.62003	6.61139	10.2652	14.7328	12.4501	11.5107	10.5812	6.6258
Gcm1	5.28313	5.50913	5.76654	5.56042	5.85454	6.7759	5.61027	6.39212	17.4633	3.67243	7.17636	5.89307	6.15524	6.23843	7.1267	7.62775	5.69019	7.67196	8.99713	14.3543	7.15757	5.89335	6.82017	6.44587	6.41754	5.40782	5.6282	4.53936	3.12657	6.00242
Kcnj15	5.44653	8.91038	4.4134	6.46731	7.27482	5.34865	6.61141	5.98794	5.24961	6.74136	6.34779	7.29062	7.78067	6.15933	8.27548	5.21742	5.78461	4.37808	14.8725	5.47609	7.42266	4.7822	7.55915	19.7376	5.75251	6.03613	8.48971	5.32694	8.8543	5.61989
A1bg	13.8206	18.6219	12.6577	8.13452	9.75445	11.6788	10.2	7.91406	6.10452	8.85125	8.59874	7.77949	9.42649	9.62395	7.76491	19.114	8.81607	8.21922	8.80129	8.86146	10.6843	8.7111	9.76582	5.64588	5.79526	14.0049	12.2217	7.09248	10.5985	11.7545
Insrr	4.46615	4.22919	4.84801	6.15586	5.28268	3.3192	5.84242	6.0079	15.1296	6.41856	6.20969	22.4511	6.79217	6.77104	6.46189	5.43564	5.39699	5.60683	4.92747	5.84898	5.8747	2.75211	5.52182	5.88036	5.06373	5.67214	4.72752	4.03307	4.82766	5.38848
Acadsb	7.97008	7.56331	3.98774	10.8735	8.36229	8.09884	7.71896	9.07672	7.85131	8.23372	7.74715	8.49155	8.33607	9.57121	8.69032	6.83423	10.2125	6.11278	9.41624	16.5037	8.80021	8.27976	9.13974	5.94013	21.5565	11.4743	11.5753	12.8175	12.2436	9.12878
Mchr1	6.31343	7.33059	9.20316	8.58797	10.7482	5.47667	5.76503	16.5566	6.06293	6.03962	7.05668	6.83894	5.3145	7.65697	8.57331	18.6875	9.73048	8.94718	8.53886	6.48584	4.0711	8.25632	8.59577	6.68495	7.42934	5.25616	6.59353	5.85054	9.76729	13.0485
Cdk5r1	6.98971	8.25699	7.03455	6.67342	17.0808	6.73797	6.21482	6.74641	8.79402	6.34839	7.84382	6.28098	6.9756	8.43216	8.20102	9.6314	9.62115	10.1811	6.4629	5.77357	6.82146	2.96309	6.55844	7.3516	6.28928	6.03613	20.0219	6.66841	5.42197	6.36134
Necab1	8.39673	16.6885	4.98243	4.88713	9.05603	5.36761	7.43844	7.12066	5.17567	7.64894	4.75969	6.4776	7.68386	6.90288	8.09465	4.8405	7.07174	7.63582	8.23334	17.0567	7.05816	2.99122	5.55774	5.19991	7.19657	10.391	6.90812	4.4182	11.0937	7.32947
Prokr1	5.4783	5.27642	6.83292	5.42302	5.32956	17.5823	7.21113	5.79832	6.96405	5.85249	7.01525	6.59982	5.52341	4.09216	6.3183	5.70841	5.71007	6.24186	6.29055	7.33218	9.16471	8.29383	7.164	19.7468	8.8069	5.45549	4.88697	2.65698	6.88189	9.93634
Dnajc21	7.22119	5.0974	18.3346	6.65052	7.692	8.92389	6.00202	10.7234	11.2941	9.04306	5.58826	9.63935	6.46606	9.10716	6.20661	9.46277	9.08443	22.1434	4.87263	8.05702	9.42508	8.12036	6.90741	4.87808	7.22508	10.469	5.4472	4.14558	6.51153	6.85721
Egr3	10.589	3.49523	8.85816	4.85049	5.88267	2.98728	6.06973	7.71945	8.21176	5.59987	6.64239	6.26504	7.78577	8.84876	6.42466	6.19445	6.11758	7.388	6.00462	6.43137	5.57173	7.54368	6.26593	6.35392	6.27028	9.949	15.5185	13.3498	7.84226	5.36959
Bbox1	7.9837	8.57026	11.6316	8.75286	5.17956	6.3776	9.82281	9.64557	9.02046	7.63958	8.59874	7.6679	7.67367	22.5649	17.4764	11.3424	10.784	10.5838	5.32308	8.42572	8.85228	8.08754	5.15233	7.02517	5.70976	6.03613	4.72752	5.38319	8.64759	7.64588
Mstn	4.52062	4.60064	7.16897	16.3973	5.97173	5.67108	6.51952	7.85418	6.77458	6.91913	6.04858	8.15146	6.96031	5.61089	9.26471	7.25083	6.02316	3.75337	5.49934	20.1782	6.44276	5.87929	7.36927	9.0987	6.00427	4.47618	10.666	9.52877	9.10408	6.31883
Syngr2	5.619	8.73137	6.79708	3.70084	8.68104	7.0936	9.17472	8.17852	8.69236	10.484	8.60795	7.67322	10.4456	9.37083	7.54153	6.9235	8.00603	8.8749	7.06218	17.5386	5.73741	9.13774	7.80547	10.0872	7.43409	9.23836	9.69206	5.95873	9.56488	19.9813
Casp7	11.533	7.65282	22.0222	8.51927	7.52794	8.67258	6.47115	6.91607	9.14061	6.97059	6.21429	5.3298	8.05582	9.79797	7.27029	7.37481	6.92762	6.64456	15.3034	6.11294	9.02743	9.96291	5.41405	8.08263	6.62655	5.22583	12.0321	12.3069	7.85948	8.07092
Inhbc	7.09864	7.12025	19.0605	5.42302	9.68882	5.02621	6.86291	7.54979	8.5491	9.93661	6.20049	7.69447	6.95012	5.81128	7.03096	25.1944	8.25948	10.305	10.2466	8.48438	5.5812	7.59056	6.7124	9.02514	5.91402	9.06937	4.53359	8.4253	8.28153	5.99297
Cd47	4.2029	5.53598	23.456	7.27802	7.85137	7.20265	7.45295	7.70448	6.46035	6.71797	4.81032	8.78913	9.98698	9.54485	5.91941	9.06105	5.21808	8.57545	5.30741	6.38947	8.7008	8.05003	8.5034	19.5031	7.18232	9.34236	12.1054	5.64716	7.0154	7.95757
Gpd1	4.72032	4.98999	5.69933	6.35281	5.91079	5.74695	6.1858	6.63164	5.69786	6.42792	6.97382	6.43509	6.45587	5.75328	6.94055	6.28868	8.99995	7.99205	15.8126	5.86574	21.1224	7.22955	7.57454	5.78841	9.86619	4.85751	6.4901	4.7038	4.53051	6.09687
Golph3	8.49658	8.54788	11.1477	7.9559	8.63885	7.84753	7.90758	9.0867	8.87258	9.18809	8.61255	8.34808	10.1704	10.0405	6.75441	9.61156	10.6697	8.63224	17.7279	6.89644	25.0894	8.63608	5.05996	9.71019	6.46504	12.6009	12.8552	9.61964	9.67686	9.01543
Mcpt1	12.5996	8.28384	11.7257	5.39095	8.75135	22.0869	7.29819	4.52089	5.85498	7.80332	7.14414	7.80075	5.99728	7.52514	7.62663	7.0822	7.6184	7.14535	8.20984	6.70371	6.1966	8.06878	7.42059	14.3032	5.83326	4.02987	5.9471	7.66369	7.06708	11.2067
Tas2r13	6.62661	5.50466	8.69237	4.49323	21.501	5.44348	5.99718	6.77635	5.69324	5.23964	6.42604	5.70709	7.70934	7.24037	7.36603	5.96135	5.98837	7.02144	5.71477	12.5485	7.8061	5.50421	10.0173	7.1677	7.8426	4.99617	6.32203	3.71284	5.23248	4.63759
Tas2r118	6.54491	16.6796	4.79873	6.90702	5.43737	9.33168	5.71183	9.81024	15.0141	8.6267	5.71715	5.51579	5.76799	7.69389	8.36057	6.39283	7.10653	7.86815	6.71749	5.81966	7.29958	5.55579	6.52765	3.86201	6.6218	4.67984	7.13653	6.66841	2.80788	4.62814
Pemt	4.96088	6.50713	7.76937	6.10089	7.32638	6.34441	5.73602	8.76734	6.94095	8.4957	5.58366	10.0007	8.07111	9.4552	7.31284	6.83918	7.24071	6.39674	17.3676	5.74005	9.01323	8.99709	9.02684	9.19985	9.08716	5.89314	5.67561	4.06336	20.3959	4.70843
LOC100912724 /// LOC691603 /// Mcpt8	4.47523	5.43305	5.26471	6.51312	8.6201	6.12629	9.11669	9.92501	8.32266	5.87121	7.21319	7.6679	6.26734	3.38025	8.58927	11.1242	10.9729	11.6215	7.19536	6.89644	5.43918	14.9983	7.95943	16.579	5.95677	10.352	13.0836	6.97997	9.42707	5.18069
Atpif1	12.1458	6.30127	21.955	6.73755	10.2044	8.86699	9.66804	8.38311	7.44003	6.21272	8.8197	21.1492	8.62141	7.94174	7.79682	9.23464	8.14518	7.85782	8.60153	6.98443	5.61433	5.49484	7.30769	9.0987	7.58134	14.0049	9.27404	8.29115	12.7474	10.3803
Ddit3	11.5149	5.81793	11.206	8.16201	6.44047	7.01299	7.38524	7.6446	6.68216	7.30275	18.003	7.29062	7.28642	6.96088	5.82368	6.95821	3.48369	8.75099	6.32189	5.78614	3.20481	7.42647	7.43598	7.63666	6.18478	6.23979	12.0321	11.6189	14.8447	9.20434
Il2	12.3137	5.77765	12.4113	2.79853	4.88894	7.10308	16.4681	6.33224	7.30602	6.68522	8.90716	6.02592	8.16283	7.20873	8.37121	7.21611	5.58583	6.04567	5.42492	17.8402	8.75287	10.127	5.44484	9.24583	8.36513	2.57825	6.05915	8.41665	4.80182	8.59985
Vapb	8.83245	5.84478	9.68707	7.63528	8.98572	6.76642	3.54027	7.32524	6.00285	5.79168	9.16033	10.5958	9.22777	10.0353	8.94028	11.8979	8.25948	10.5838	17.7945	9.86283	8.14694	6.82166	5.87078	9.74237	5.93302	10.2177	6.77022	12.8998	8.69926	19.1501
Fgf11	10.1078	7.62596	4.91074	8.72538	5.09987	8.34541	7.12891	6.43703	16.3634	6.60101	7.07049	5.49985	6.95012	5.77964	8.33398	10.2166	5.07396	7.1247	7.6928	5.74424	7.23804	8.30789	4.36203	17.3974	6.98757	7.90807	8.81292	5.67745	6.1627	2.6966
Fgf17	7.04417	7.93029	5.06308	8.16201	11.2919	7.58673	7.10956	5.97796	5.54074	6.20336	7.78398	6.11626	6.77688	21.1358	6.52571	3.19393	6.74872	3.22677	7.15619	8.79862	8.81914	9.65347	8.98065	4.51487	9.82344	6.41312	4.99902	7.25692	13.8973	9.94106
Kcnip1	4.7884	9.0715	4.61502	5.57416	8.24511	3.31445	6.50017	6.83623	6.26626	17.1505	6.44906	3.7569	6.40492	6.46518	6.02578	5.31165	5.72498	5.56036	6.21613	5.96211	6.30074	5.3073	5.79381	17.1124	6.78331	5.62881	6.27463	4.61725	6.71824	6.61636
Rap2a	2.9729	6.18491	4.66431	9.5773	7.87481	5.55254	7.4723	7.04581	6.08604	5.55776	6.67001	5.68583	7.26094	7.22455	6.85546	16.7086	6.51515	6.6807	8.45268	5.45095	5.23089	6.03869	6.88175	7.10333	19.7466	5.37315	4.25778	4.6562	5.72343	5.26097
Ube2n	8.61913	9.61749	8.48178	8.15743	22.9822	10.9391	8.78781	7.23542	7.70805	6.55423	5.08652	5.49985	9.21757	8.34779	9.90824	7.49384	7.97124	9.47895	7.80248	7.49558	5.54806	5.42451	8.71893	18.3031	6.76906	7.55708	4.98609	5.15817	8.15664	10.777
Fkbp1a	11.6873	21.9425	14.0109	9.56814	5.48893	6.02671	8.21711	6.52186	6.57588	6.55423	9.39049	10.4417	9.92074	11.1321	8.66372	9.45285	10.7294	9.39634	17.7279	10.1854	6.44276	6.53567	8.1493	7.17689	7.43409	5.77181	9.70499	10.4678	8.93613	12.6188
Abcc8	12.5951	9.15205	10.1531	6.61388	9.31383	7.10308	8.99577	10.1645	8.77554	11.1997	7.97731	9.78282	7.56667	8.7011	9.77528	7.0822	10.0933	9.97458	4.63762	7.86848	4.03323	7.91407	7.04597	9.07571	19.7419	14.0049	9.18785	24.0599	12.0282	13.2374
Slc4a1	7.57521	10.6379	11.905	10.475	19.7105	6.59572	9.08283	8.91205	16.1	8.83722	7.74255	7.94954	6.87879	3.94977	7.49367	10.1869	10.4709	11.9261	10.2466	6.03334	6.75046	8.24694	6.07605	7.08034	6.23703	5.82381	10.61	11.7487	9.12992	9.9694
Sord	13.2623	8.4718	12.7249	10.5621	11.5357	11.8543	11.2302	7.38512	9.46871	11.0641	9.10509	8.31088	7.61252	8.76439	8.0787	10.167	10.2871	21.338	8.99322	4.81829	9.29253	6.91543	9.41173	8.08263	9.10141	10.3867	22.6119	9.16527	7.56664	12.751
Gja1	8.5102	6.1133	22.2328	5.87188	6.25766	9.78689	7.56903	6.98593	6.93632	7.72847	4.72747	8.16741	7.71443	6.27007	5.93005	7.474	8.26942	6.16441	7.5988	6.35595	9.47715	9.06273	6.19409	19.5031	6.27978	6.64278	4.98609	6.81554	9.77591	8.04258
Calcrl	13.2623	5.32117	9.1718	5.8444	5.98579	7.03669	7.20146	9.08171	7.50935	7.25597	7.53541	8.17272	7.01636	7.62533	7.28625	10.1224	8.10542	6.08697	16.8975	7.00118	8.94696	8.36415	5.50642	7.09873	7.31533	9.99667	4.60685	4.86391	8.57007	24.293
Cpa1	4.72486	7.54541	5.4977	8.13911	5.97173	5.22062	5.74569	5.87317	6.85314	7.85011	7.12112	7.15246	6.07371	6.39136	7.17456	5.6737	7.28543	4.05282	5.67951	6.09199	18.6703	6.07151	6.12224	4.79992	6.04702	6.58645	4.64995	13.7003	6.08949	7.13584
Cebpa	4.65224	10.4902	9.3555	25.2784	8.48885	5.82282	5.35877	7.28033	9.08977	8.22437	9.57462	10.5905	8.77428	10.6206	6.0896	8.76348	8.8608	6.6807	15.7068	6.89644	5.64747	5.75739	6.68674	9.17686	5.21098	7.1671	6.82193	4.33165	5.18941	10.248
Dnm2	7.67053	9.8144	4.76736	7.62154	5.63424	5.7754	5.97784	3.18858	7.28753	7.25129	5.56985	5.7868	6.47116	18.5887	7.9936	6.0655	19.4361	6.44837	7.99441	6.26378	6.54217	3.53976	7.37953	6.06887	6.20853	7.88207	4.1285	4.53071	6.35649	6.57385
Avpr1a	13.0399	10.7095	12.0259	6.82457	7.92637	6.57675	9.59549	8.75237	5.49915	8.43489	7.42493	9.34708	8.83542	4.44547	8.73818	8.81308	8.40359	9.48927	8.56627	7.88524	7.33745	19.7055	7.6977	9.77915	7.79985	7.07177	12.4458	10.4721	10.8612	24.1797
Il18	10.3121	10.4812	9.96486	10.7269	7.03576	10.0761	7.01767	11.6316	8.83561	6.40453	8.47906	6.96647	9.13605	4.47184	7.90851	8.37168	9.95411	10.6922	6.45898	8.59331	6.93034	6.37626	8.54958	19.4755	8.8734	23.1999	10.2264	9.01382	12.4589	12.6046
Gpd2	5.2559	4.37687	7.16001	7.56657	4.96394	11.6741	7.17727	9.10167	9.28848	3.69582	7.65509	7.8592	6.69535	7.38803	6.50976	6.64576	5.72995	19.3245	7.95524	7.47882	5.69008	5.92617	6.0504	10.3814	6.07077	10.365	11.1487	19.0272	10.8353	6.47468
Vps52	10.1078	8.93724	5.64108	10.0307	5.34362	6.97031	7.16276	7.56975	5.79952	7.85478	7.59525	23.2747	4.56038	6.83432	17.8912	8.52046	8.55765	8.38443	8.84829	8.41315	5.74688	8.16255	5.68091	8.10561	6.05177	11.6909	5.81351	12.3415	4.50898	10.8053
Nln	9.3998	9.66672	5.4529	6.27494	23.9338	6.49614	7.31753	7.15559	8.47516	5.33788	4.99905	9.86784	9.7424	9.75051	5.89282	7.40953	8.03087	8.86973	6.0712	5.89507	23.939	6.59662	9.01658	7.24126	9.34842	4.98317	11.4934	12.3069	11.6708	6.91388
Cd200	7.92016	5.90744	5.27367	5.69325	5.6483	4.42401	7.09505	6.0578	5.49453	5.87121	8.29033	6.57325	21.0236	5.81656	6.49912	3.76924	7.91657	8.80262	4.32426	5.65625	6.01671	6.09027	6.1479	7.19069	6.75955	4.28552	5.02918	5.85054	13.7379	6.78165
Otc	7.68868	5.65234	5.9144	6.31617	5.00613	6.719	5.41197	5.59872	7.44927	3.19525	19.8443	8.10364	8.84052	8.21595	7.42453	8.64445	10.1231	9.28792	4.69637	3.5781	23.3	8.5095	8.50853	5.50336	5.41999	6.30046	4.94299	4.37492	4.89657	5.22319
Alox5ap	13.462	6.7488	14.3379	7.67192	7.44357	6.56727	7.71412	7.36017	6.56663	7.40567	19.5635	8.63503	8.44817	6.30698	7.42985	8.88251	10.2225	8.09015	9.12639	6.21769	4.98	9.44718	7.30256	8.3355	4.12794	11.5566	8.74397	14.3234	22.7344	9.19962
Itpr2	6.8127	25.6078	7.38404	9.94372	7.84199	6.46769	9.06349	9.44597	5.64703	5.34724	7.89446	7.80075	10.0787	6.46518	6.6374	17.7204	10.2821	9.6803	8.13933	6.22607	6.18713	6.01056	6.79964	5.78381	6.08977	4.56285	9.79979	7.76755	4.9827	7.74033
Cnr1	8.02001	6.16253	10.5429	6.84289	4.95457	3.96407	5.35877	5.46898	5.03242	19.3212	5.3489	7.73698	5.99728	6.98198	6.898	9.01642	7.05186	7.69261	6.82717	7.84753	6.72205	19.9164	3.99767	4.93785	8.07536	4.99617	7.39079	6.61215	5.36598	5.67656
Isl1	9.7039	7.38877	8.7551	7.52077	5.6108	5.48141	9.04414	9.8302	9.21454	16.692	21.0872	7.58288	6.35906	7.26147	7.08947	5.40588	5.39202	6.91302	5.421	10.1896	7.05342	7.39365	6.27106	8.72629	6.34629	5.47282	4.89559	2.40599	5.67605	6.42273
Bid	7.52528	8.42257	7.58118	13.0262	9.68414	5.16846	6.77585	7.65957	8.78016	6.66651	8.72763	6.89208	8.40741	7.53041	21.8215	8.21297	10.7294	5.16799	5.74218	17.614	5.89836	5.04944	4.88034	4.59763	8.72139	4.54985	6.56336	5.66879	4.5219	8.89737
Nsf	14.7329	5.6971	9.79908	4.93293	6.53421	7.78114	7.4723	7.0009	7.18124	6.06769	7.32826	7.54037	5.40622	7.21401	6.99905	8.01955	7.1115	23.8471	5.53067	6.92158	7.53627	9.20338	8.26733	7.1723	4.84047	6.60378	7.38217	10.6063	6.66226	8.82181
Wt1	8.16979	6.0417	7.5767	9.37577	5.27799	8.46869	7.37557	6.32725	9.07129	6.22675	7.17636	8.07176	4.06613	5.6689	8.9456	7.71702	7.70288	7.99722	7.75939	7.1185	18.4099	6.24499	3.91043	7.76079	5.82851	6.1228	8.99392	13.2935	5.32722	5.30347
LOC100909655 /// RragB	6.98971	4.80651	5.2199	7.89635	7.70606	7.25481	3.33231	6.57675	8.31804	5.13204	8.72763	7.3597	7.62272	6.21206	7.1852	5.8572	6.39588	5.70492	13.6112	6.59058	6.8688	22.6217	5.73736	7.20448	6.72155	2.66058	4.74476	5.48272	6.67518	5.61517
Abcc3	4.96088	11.6448	4.69119	6.79251	9.84819	6.56252	6.47599	7.09072	6.68678	7.32614	7.15334	6.83363	6.10429	7.90482	7.15861	8.27745	5.77965	8.7355	13.153	6.43975	5.86049	5.37763	3.29462	7.51712	6.82131	10.534	13.0836	23.2897	8.74233	13.2374
Lipc	9.19101	5.27194	4.33274	8.31315	9.22009	8.32644	10.0888	6.98593	7.28753	20.1726	6.75747	7.5882	6.02276	6.31226	7.50962	5.54971	14.9237	5.50357	3.76415	5.97049	7.02502	8.5892	7.63612	5.75163	7.58609	5.79347	4.06385	8.63301	6.44262	9.091
Ensa	8.51474	7.86763	6.36246	8.65209	10.0357	6.61942	7.39008	6.36218	6.6683	6.82557	7.38811	5.64332	8.00997	6.09605	7.83937	10.6134	24.7884	8.02303	11.1083	5.23727	5.24983	5.36825	6.64055	9.21364	7.62884	7.79974	21.8879	9.16095	5.31	5.37904
Epas1	8.47389	6.61454	9.48992	5.8444	22.7432	5.93662	8.27998	6.452	6.30323	6.70861	7.84842	6.54136	5.27883	7.09272	6.93523	9.1404	22.2638	6.91819	7.01126	7.99836	5.17882	8.19068	5.62959	8.06424	6.06602	4.79684	4.31812	4.76438	5.14204	7.32002
Slc6a20	4.40261	6.1312	6.06674	6.32533	3.65147	5.70902	5.61994	18.7722	6.95019	7.07352	5.60207	4.00665	7.05203	5.14156	6.47785	9.25447	8.91049	11.0123	7.91998	6.28054	7.78243	4.83377	6.31725	9.8849	6.11353	4.41985	5.1757	5.55628	8.37197	15.7971
Lgals5 /// Lgals9	5.93218	8.35544	23.6262	8.78034	5.64361	9.31271	5.63445	7.56476	5.84574	7.03609	5.59287	8.42247	6.71573	6.90815	6.20129	10.2067	10.1628	8.5135	6.77625	17.0526	5.54806	7.34208	8.25194	5.74703	6.40804	6.01447	6.38667	5.5909	5.21095	5.8513
Ssr3	9.81736	12.8755	12.6129	9.03683	10.8794	6.32544	6.83872	6.84122	7.12579	6.29225	6.15906	10.0963	7.38833	9.48684	9.8125	9.16024	8.04081	8.25536	17.3676	8.74415	6.48063	6.12309	7.65152	9.95386	7.36758	9.38569	24.4392	6.52993	12.2436	9.24212
Myo1b	7.46174	12.8755	24.8898	11.3773	12.1169	5.4909	7.09989	7.01587	7.74964	5.30514	7.48017	9.58089	6.30301	9.26536	8.37121	9.53717	9.13413	8.4722	5.67168	16.5037	8.44517	7.71715	7.96969	5.06658	8.27012	6.02747	6.23153	4.64322	4.56065	6.24327
Strn	5.19236	5.16453	5.15718	6.11005	4.91707	2.76442	7.45779	6.58174	6.96867	5.52501	7.93128	8.94323	7.25075	10.7841	6.32361	5.93655	16.9762	5.59134	6.11037	6.54868	15.8016	5.91211	6.84582	3.44822	5.477	6.78144	5.22742	4.48744	4.28934	6.86193
Xylt2	3.71725	4.68567	7.78281	7.14061	5.75611	7.97555	9.26662	9.17152	8.86796	8.34132	4.00016	6.21722	21.5484	7.41967	6.55231	7.25579	6.28654	8.72517	5.40141	6.12551	7.41793	8.67359	6.41475	5.74243	14.8539	5.1565	5.75318	7.56416	5.45642	7.95757
Apoa2	9.49965	7.39325	11.3852	10.3101	8.74197	11.1003	5.27172	6.47196	6.45573	23.017	6.18668	6.8602	8.17302	4.69332	8.23293	9.8397	7.87682	9.56671	8.28817	7.15621	6.35755	8.40635	6.62516	5.14934	6.44604	9.60235	9.44211	9.06142	9.43138	15.3957
Arl5a	13.8206	6.90096	12.7249	6.87954	4.96394	9.4929	7.16276	9.50585	9.57037	8.10741	19.7292	7.41284	6.72593	8.10521	6.30234	7.83605	5.19323	8.64257	6.788	4.93979	7.41319	24.9237	10.8486	5.96312	8.27012	12.8392	9.51537	10.9654	9.07824	8.84542
St3gal2	7.58883	9.34449	17.5147	11.0521	8.46542	6.95134	7.44811	7.25039	6.16459	7.43374	7.97731	8.80507	8.57046	20.3922	8.17975	5.27693	9.65096	10.4444	9.26348	5.56827	4.22732	6.57786	5.98368	8.901	7.53384	9.0087	3.63291	9.19989	5.40474	5.67656
Ctnnb1	13.2124	11.6448	11.6182	5.49172	10.181	6.92764	6.81454	9.50086	7.75427	7.31211	6.15906	8.14615	8.38193	8.3056	8.57331	8.50063	8.09051	5.63264	15.7068	9.31396	8.3789	7.49211	6.50713	8.45044	7.35808	5.0655	12.9156	8.72821	23.7033	7.10751
Acox3	17.3018	6.89201	7.99788	7.00778	5.32956	6.28276	6.36475	7.34021	5.88733	5.67004	5.7862	7.83795	7.12337	6.17515	6.63208	7.51864	9.29812	7.35703	17.8102	5.84479	5.57173	5.9168	7.83626	4.47349	4.4367	6.0578	5.05935	5.88949	5.37029	9.27518
Gas6	8.57828	6.92781	8.60276	7.13145	5.09519	9.54032	6.32122	9.89507	9.14523	5.99284	8.50668	7.54568	7.00617	8.53763	7.9351	8.24273	8.78128	9.33439	8.1315	8.37544	12.0524	10.9334	8.43668	20.7721	6.39854	6.34812	4.84387	8.61138	20.3959	7.20196
Emp1	21.6772	5.57626	4.7136	5.26271	8.18417	7.47293	6.77585	6.71148	6.8439	6.0864	7.64128	6.57856	6.32848	6.96616	8.24889	5.55467	7.2904	4.4865	9.27132	6.04591	6.8546	18.81	6.41475	7.99067	8.7879	12.4839	4.96023	12.3372	11.2918	7.66949
Crem	11.3787	10.517	8.38321	9.28875	10.2701	9.01399	8.18325	7.84919	7.54631	7.04077	8.03255	8.59251	7.84691	7.24565	7.83937	8.77836	7.7973	8.18308	6.87025	6.86292	7.41319	10.488	8.64196	6.23438	20.8249	10.534	11.502	10.4894	19.5303	6.62108
Slco1b2	6.16819	6.88753	4.81665	7.3284	9.24821	5.98878	5.91496	9.90505	6.58512	8.56588	7.12572	10.7499	24.621	6.06441	8.69563	8.65437	9.44721	11.9261	7.18361	18.8961	5.92677	6.99982	10.161	10.2803	7.93286	9.29469	10.1833	11.8352	5.89569	10.98
Nat2	5.92764	5.48228	4.35963	5.59707	7.2092	6.3776	6.48083	6.46198	6.428	5.87588	17.8281	6.31287	6.01766	8.25287	7.37134	5.73321	8.80116	8.43606	5.38966	5.15766	15.6406	5.64955	6.40962	7.40218	5.58625	4.46319	3.25367	7.29587	7.72598	6.19605
Tshb	10.8613	6.57426	8.68789	5.37721	17.2636	7.57251	6.36959	5.78834	6.16922	7.8735	6.67001	6.87614	8.29021	8.33197	6.23852	5.78777	7.15622	3.55202	16.0201	9.65753	8.51618	2.82712	6.80477	9.12169	9.00641	8.21139	7.64074	4.67351	6.2316	5.95047
Pou1f1	6.84447	5.58521	6.03089	5.89936	5.27331	3.30971	3.28394	7.46496	7.62949	9.18341	7.13493	7.3597	6.34377	5.59507	6.62676	18.6974	6.44557	7.27958	5.58943	8.28327	6.68892	5.12445	7.7131	6.44587	5.29174	20.431	5.82213	5.50868	7.55372	5.79935
Hist1h1d	8.08355	5.42858	6.76571	6.9574	6.45922	5.69953	5.87144	7.31526	11.2571	23.2462	6.54112	7.3225	8.90166	5.89566	6.0896	8.06419	11.0325	8.69936	9.20865	5.8029	6.39542	23.7469	8.76512	5.28267	9.42918	4.47185	6.13241	6.4607	4.71569	6.2291
Kcne1	9.44519	6.29232	6.63578	5.8673	5.77954	9.3791	6.31639	8.09869	9.39939	7.30275	7.64128	7.00898	5.43679	6.44409	7.25434	9.80002	7.9116	6.96981	13.1216	17.3836	6.5185	5.02131	7.96456	6.10105	8.40313	5.97547	4.43016	3.29742	4.86642	6.61636
Irs1	4.56147	5.8045	8.49075	9.79716	7.51856	6.2069	6.34541	7.2005	5.72559	5.30514	5.82763	8.59783	7.3119	7.18764	7.00969	7.15163	7.10653	3.0409	7.72414	5.73167	5.46759	21.1448	5.70143	6.03668	6.49829	14.1219	4.20607	4.61725	4.66401	7.31058
Slc6a9	12.3137	9.42057	12.1962	10.1224	4.72488	7.28326	6.17613	8.09869	9.14061	9.33779	6.60557	9.01762	7.65329	6.30698	7.66918	9.19992	10.9381	8.96783	4.8648	6.98443	21.1224	5.7527	9.82227	8.50561	6.07077	13.6495	24.7796	5.71207	8.95766	4.89261
Bmp3	5.07889	5.43305	17.7925	5.61081	3.14055	6.60994	6.74683	6.52186	6.23391	5.28642	7.0935	6.19596	8.12716	7.18237	7.29689	8.88747	6.05794	6.91302	5.46017	5.1828	5.0084	5.30261	6.35317	20.7307	5.86176	4.54552	5.64975	6.70735	5.577	4.83594
LOC100909491 /// Nucks1	10.2758	9.57273	8.86264	5.26271	8.67166	6.86125	6.49534	8.06376	8.09623	6.93317	17.4553	8.23649	6.11448	7.80463	6.48317	6.72016	8.25451	23.8316	4.54361	5.58922	10.0168	8.76736	6.5841	7.9309	6.23703	2.97257	5.3093	7.69398	7.82503	8.20787
Myo1d	6.90347	5.52256	6.67162	9.61395	9.68882	7.67683	7.00316	6.24243	6.41414	6.28757	7.77477	6.94522	7.05203	8.82239	7.97233	8.53534	20.8574	8.48768	4.85305	5.761	9.62863	8.11567	6.64055	8.42285	3.37265	5.71114	5.9902	7.55984	6.757	19.6791
Rasgrf2	7.73861	4.74833	8.05613	7.47497	5.20768	6.13577	7.50132	5.46898	6.03058	7.23725	7.29604	5.95684	4.60624	5.73218	8.25952	6.36307	7.74264	5.69976	8.30384	17.0567	10.4949	9.04398	8.32892	6.73092	5.00198	8.67938	4.55514	23.6315	9.14715	5.76629
Ppat	9.28633	6.22966	11.9319	8.13452	7.26545	9.65412	6.23901	7.72943	7.62949	9.76819	9.63906	7.76355	8.03035	8.09466	8.7435	5.34141	5.92873	6.81493	15.4091	5.34621	6.45222	7.97501	8.41102	7.38379	9.03016	10.3563	8.32595	22.0867	4.90087	6.44634
Jun	20.8193	5.90744	6.25492	5.98181	5.74205	5.84653	6.19064	5.72846	5.66089	6.1519	6.60557	7.22154	6.44058	7.22455	5.90878	18.6875	5.90885	5.86497	5.43275	6.40204	4.16105	6.01525	6.36344	6.45966	6.6978	7.84307	4.22762	4.23212	4.93102	6.68247
Tat	6.86716	6.8025	8.17262	7.42917	14.2075	6.62417	17.0484	7.02086	6.44186	5.67004	5.88747	9.278	9.84431	8.51654	9.79123	5.391	7.49913	5.67394	8.08841	5.63111	5.2877	6.30593	5.90157	9.76995	2.76937	5.52482	9.23956	8.4253	11.154	7.797
Gpr6	4.74302	4.79308	6.24148	7.9559	6.55765	17.6913	6.89676	5.78834	7.27367	5.31917	7.8162	8.52343	5.60494	6.8185	6.65336	5.77289	6.6046	6.04051	4.54753	7.00956	7.33272	7.67964	6.56358	8.69871	21.3807	7.21909	8.8043	4.31867	4.89226	5.22319
Mcam	5.89587	8.7448	4.99139	11.075	27.0462	5.87498	6.3309	5.73345	7.0195	8.40682	9.72192	8.25774	21.9968	8.24232	6.00983	5.70841	4.27386	6.32962	7.55571	9.97595	8.36943	8.96896	6.035	9.95386	8.9494	5.08716	6.56767	7.78918	6.39525	8.27871
Abat	9.0367	10.5305	10.0769	12.5819	7.06389	24.3013	11.1335	6.51188	9.39477	8.19162	7.85303	7.54568	7.60233	8.54818	8.00956	9.74547	9.21861	9.00397	5.46017	3.28063	8.00966	6.08558	7.16913	8.57917	7.50534	11.132	6.83917	20.0355	12.0282	12.2079
Csnk1e	14.0838	6.1312	6.85533	5.20316	8.99509	5.65686	6.99349	6.51188	15.832	6.37178	7.22699	7.00367	7.49533	6.70249	7.3022	8.36672	7.35004	9.44281	9.33399	6.03334	3.73027	5.99181	6.07092	6.62518	4.00918	10.5297	12.9156	6.002	12.9111	9.19489
P2ry4	7.09864	5.95667	6.36246	5.75279	7.15295	6.65736	5.69732	6.4021	5.47142	7.15772	7.72414	6.61044	6.64949	7.25092	6.42998	4.42886	23.3174	7.45512	9.49066	7.00956	5.19302	3.08499	8.04667	9.19985	8.38888	4.61051	14.8979	7.65936	6.83021	7.1689
Rab3a	7.31196	5.49123	4.83009	6.99404	5.53111	5.59047	5.66831	6.62166	7.17662	7.56473	6.72064	7.52974	6.8635	6.43354	8.77009	7.00781	6.8829	21.7045	3.90516	5.95373	6.44749	6.48878	17.0992	7.26885	7.56709	3.41455	4.69304	6.04094	6.4297	8.28343
Gabrb2	4.35722	7.7647	4.57022	2.83518	5.11394	6.69055	5.91013	17.859	5.80415	5.83846	9.5516	7.2056	7.13865	4.50875	6.3768	5.98615	7.12641	6.48451	5.80094	8.40896	18.2016	4.98849	6.08119	8.1378	5.87126	9.23403	9.64034	6.62946	9.50459	7.28224
Bsn	5.08796	4.96762	4.60158	6.12379	7.89824	7.00824	7.57386	6.28733	4.38546	3.88295	7.88525	10.0485	5.55398	8.35833	9.28598	7.107	7.47428	5.66362	12.3813	6.0501	9.08897	8.28445	5.97342	5.65048	19.5091	7.05443	6.24015	7.58147	5.35306	9.70966
Mcf2l	4.74756	4.88259	5.39465	5.5421	6.11235	3.41877	5.55707	5.68854	6.0352	5.25835	6.27874	7.35439	7.88768	4.95699	6.46721	7.03261	4.90003	7.46028	4.59061	5.42581	4.98	5.20415	21.6819	18.1514	6.6028	5.10016	6.43839	5.47839	5.33584	5.68128
Mmp2	12.3318	4.89601	10.861	5.24897	7.86543	5.18269	6.98865	6.1576	4.8106	7.88285	8.92097	21.0695	23.8159	5.59507	7.40857	10.2464	7.90166	6.53614	5.09198	6.02077	5.52912	7.10766	5.54235	7.46654	5.48175	8.95237	10.9375	4.43983	6.25313	5.19013
Bcan	7.52982	6.4758	7.42884	6.68259	5.52174	6.81383	5.6538	6.09273	6.47421	6.79282	5.31207	8.14084	8.83032	6.54956	7.39794	8.57998	7.41464	7.51191	7.70064	18.5148	5.18355	7.91407	7.96969	6.33553	5.71451	5.86714	4.57668	24.4061	7.48912	4.954
Adam3a	4.95634	4.86469	5.26471	17.2813	6.36547	7.00824	7.72863	6.28733	9.51492	8.81383	6.21429	6.91865	6.76669	6.6603	6.37148	7.00285	6.67914	5.90111	6.70183	6.07104	5.89836	8.95021	6.62003	4.80912	23.9458	5.1175	6.65817	4.83362	5.08606	7.23029
Adam2	20.9737	6.62349	5.29607	7.22764	9.38414	5.56202	6.47599	6.38713	6.22929	5.20222	6.69303	6.55199	7.57686	5.89038	6.94055	10.6183	10.784	8.86457	7.65363	8.01931	7.67829	5.78083	21.569	8.05044	6.42704	5.1045	3.91733	6.88045	7.81211	6.7722
Ifit1	8.48297	7.09788	6.12499	7.2826	6.3889	9.40281	4.29476	9.55076	8.7247	20.7293	7.31446	7.40221	8.00997	6.29116	6.78632	4.6322	8.52286	8.26052	9.52592	16.1559	8.91855	8.95021	10.628	9.94926	11.5193	11.1016	10.3816	4.95046	6.19284	6.75803
UST4r /// Ust5r	9.8219	10.8124	14.4186	11.8216	12.5856	17.4542	6.79036	7.49989	6.48345	7.95303	7.73795	9.07076	4.89158	7.95756	7.70109	9.04617	9.02479	7.06274	5.76569	6.51517	8.01439	8.13442	7.99022	7.98608	6.6598	13.8402	11.9675	13.8388	14.0265	24.293
Gabra3	5.16058	6.44448	4.72704	4.03062	5.85454	5.3771	6.91611	6.8512	6.58512	6.27354	6.44445	7.52443	6.94503	7.06108	7.65854	6.16469	5.73989	7.60484	6.64307	17.2914	6.40015	5.54172	7.06136	6.02749	6.34154	2.60425	5.19725	4.72544	4.80613	18.8526
Ugt2a1	4.37538	7.27241	5.42153	5.28561	6.23422	5.78963	6.84356	8.26335	5.69786	7.75186	9.23398	7.21622	8.45327	7.33529	7.77023	11.1986	5.74983	8.49801	17.7945	8.67711	8.13274	7.32801	6.34804	6.34472	6.19428	12.6702	24.4392	9.32971	6.10241	9.87022
Neurog3	6.53583	6.22966	5.60524	5.08408	6.29516	16.5296	7.70928	5.74343	5.62854	6.90978	7.15795	7.35439	7.55648	7.25619	6.55231	2.81701	6.13249	5.82367	6.23571	9.16313	7.95285	6.37157	7.25637	18.8687	7.12057	6.1358	2.5857	6.23567	5.85693	7.20196
Ceacam1	9.6812	9.84125	7.16449	9.94372	11.1935	7.23585	8.26064	6.07776	5.90581	5.88056	6.26953	8.7785	5.63551	7.93119	6.57358	6.46226	9.33291	6.11278	17.8298	6.92996	6.06405	5.13852	18.0588	5.88036	6.15628	4.73618	4.1285	4.47878	4.89226	9.29407
Slc14a1	5.57361	8.30174	7.738	6.90702	5.72798	5.58099	7.67543	6.03285	4.51485	6.61973	7.22239	5.60612	6.44568	7.29838	6.21725	7.06236	21.8762	7.35703	8.26467	7.47463	5.24983	5.57923	4.40822	8.69871	21.5565	10.5686	2.89598	8.48156	4.70708	5.71434
Gabra6	4.24829	15.8785	4.87042	3.45351	5.4608	5.78963	6.9548	7.19551	5.55923	3.23267	6.73906	5.74428	6.09919	7.95756	5.78645	5.08351	7.34507	6.42255	7.35203	13.9982	6.29601	8.19537	7.32821	7.5493	5.4485	5.0655	6.26601	4.36627	8.34613	7.82062
Adh4	6.08649	5.55389	6.11154	5.5192	4.89363	9.94336	21.8655	9.64557	9.25613	7.50392	7.40652	6.60513	2.97571	4.71442	6.74377	6.89374	6.03309	5.75655	5.41708	5.50123	8.21795	8.26101	5.28062	16.1147	5.11123	4.75351	4.51635	6.01931	6.99386	5.76157
Sds	14.5558	6.67719	11.0402	8.10704	7.5795	6.42976	8.17358	6.83124	6.08604	23.2462	6.15445	5.45734	8.9679	8.43216	8.55735	8.57502	7.21089	8.3741	7.74372	5.78614	9.6665	9.01585	7.3744	6.47346	6.21328	8.31972	5.12399	24.4061	5.69328	10.5314
Gpr182	10.8386	23.3568	10.6683	7.31924	7.2842	6.18793	5.51838	7.84919	5.97975	7.71444	7.77017	7.60945	5.6457	6.9978	5.97792	12.617	11.4152	8.02303	18.0217	6.05429	6.02144	7.92344	7.04597	8.17458	7.92811	5.93214	6.43408	11.6275	5.71051	12.8974
Avpr2	4.29368	2.994	5.74862	7.14061	6.72171	20.0574	5.31525	6.59671	5.76256	8.48635	8.2489	6.34475	19.7192	6.53901	6.69059	5.54971	6.69405	6.01469	4.87263	6.10456	5.9599	5.29792	9.09355	5.14934	7.32483	5.17383	2.7236	4.39656	5.52102	7.67422
Cxcr1	4.52062	4.55589	8.15022	7.20931	7.12014	6.89919	6.18097	6.44701	17.4633	6.05366	5.89668	6.00466	6.25205	6.74995	8.77541	6.36307	5.07396	3.39714	6.72141	17.3333	9.96947	8.47199	4.47493	7.43436	6.21328	11.535	6.80469	7.84111	7.8035	6.83832
Cd8a	9.43611	6.3505	17.3534	5.55126	5.18893	5.87972	8.75879	9.00686	9.0528	5.94606	5.04509	6.52011	6.95012	6.92397	7.60536	21.4698	8.84092	8.46187	5.21732	6.53192	5.53386	7.22018	3.34594	7.01138	5.94727	4.45452	4.7189	7.64638	4.50036	8.26454
Tmbim6	8.24695	7.05312	9.43615	5.56958	8.54041	6.51511	5.87627	5.67357	6.45573	20.5282	7.96811	5.81868	7.34247	5.84292	5.73327	11.2829	26.8309	7.07823	5.34266	5.89926	6.21553	6.70445	6.06066	5.33325	6.16578	7.63941	4.72321	4.5134	6.26605	5.79462
Hist1h2aa	13.9567	5.11083	4.96451	6.22456	6.2811	5.88446	5.81824	6.97096	3.99266	6.10044	6.61477	5.71772	5.57437	6.95561	6.30766	6.95821	5.74486	6.18506	12.2795	7.47463	5.9173	5.86053	7.25637	5.38842	8.7784	5.56382	2.34006	4.35329	5.69759	5.54905
Gnas	11.7554	9.99341	14.0557	8.15743	7.56544	13.291	10.2436	11.4519	23.2258	8.10741	7.44334	6.27036	7.36795	7.93119	6.7225	11.9029	8.8608	8.9575	9.20865	6.8713	8.41677	7.97501	9.74529	8.74009	9.75219	4.72318	7.352	23.8306	4.87073	8.8832
Rabggta	4.76571	5.28984	5.81582	6.48563	7.04045	6.51037	7.32237	2.93409	6.74224	6.68522	5.58366	5.31386	7.24056	7.86263	20.7685	3.04019	5.54607	6.69618	5.82052	6.98024	6.18239	19.1428	5.53208	5.37922	6.31303	7.77374	4.47326	5.50003	5.90861	5.74268
Fas	5.74155	5.39277	6.20116	6.9345	5.75611	5.55728	8.08169	7.42005	5.34665	5.53437	7.17176	5.2501	6.70045	24.5266	5.89814	6.99789	6.0977	5.77204	4.73162	5.94116	6.36228	7.82499	6.80477	5.4252	7.6906	4.32452	4.8094	12.969	5.68467	4.51008
Mcfd2	12.999	9.03569	13.1192	25.2784	13.1856	6.83754	6.34057	7.94899	8.92341	6.03027	7.69192	8.0133	7.48004	8.26869	9.41894	7.90052	7.21089	6.84074	4.97055	8.9285	23.5035	9.69567	8.14417	7.5539	7.42458	6.0448	5.27482	8.77581	9.76299	10.4511
Tmem150a	21.0644	6.31917	9.52129	6.6551	4.99206	23.8318	10.9304	8.48291	12.9392	9.54363	7.92208	10.0166	9.27872	8.89095	6.63208	7.36985	6.54496	7.34154	8.19808	7.00118	10.6843	9.21745	6.89714	6.45507	5.92827	14.6895	13.4068	14.2932	8.34613	7.51365
Cxcr5	8.16071	5.0795	8.49523	5.91768	6.89983	7.06989	6.83872	7.30528	7.37071	7.30743	7.09811	8.17272	6.64949	8.18431	7.56813	5.36125	17.5228	5.88046	6.14954	17.1992	6.15399	5.41513	6.84582	6.08266	5.01148	2.9769	4.87404	5.58225	5.01715	6.04964
Crk	11.1835	5.32564	6.19668	9.8338	6.4639	5.12579	9.40204	8.48291	5.32817	8.5191	8.55731	11.3398	9.36534	9.71887	9.17961	12.1806	25.0518	10.4031	7.00735	6.59058	5.99778	5.41982	17.053	5.57692	5.86176	7.23209	4.64995	5.7337	6.89051	11.4759
Hrh2	4.8701	4.41715	6.85084	5.04744	3.68428	5.65212	6.99349	7.26037	6.56663	21.3422	6.3708	7.38095	6.00747	7.24565	6.89269	5.57451	21.8364	3.81533	5.48759	6.29311	6.77886	6.43252	6.11198	6.33553	6.01852	11.1103	10.7134	9.16527	4.81905	5.11457
Plbd2	6.75369	10.8706	8.80887	8.05666	27.0462	10.0477	12.9181	11.8062	9.37166	11.1857	5.54683	9.12921	7.25585	9.76633	8.6584	5.45052	4.50246	8.28117	7.32853	6.92577	6.31494	18.4021	7.35901	7.1677	7.36758	5.26483	8.69656	4.12394	4.63387	10.1677
Gpx3	4.51154	22.4304	4.4582	7.51619	8.95759	9.56403	4.78807	9.55076	6.71451	9.90386	5.5008	5.95684	5.7578	6.80268	6.94587	6.6904	21.9159	6.53097	5.60118	9.44804	8.09487	6.26374	9.2783	7.33321	8.37938	6.07946	8.94651	8.4253	5.8397	5.7899
Mdh2	7.60698	6.95914	7.36163	7.11313	7.67794	5.2301	7.39975	7.45498	4.81522	7.05948	19.6234	8.55532	8.5246	7.10327	6.61081	7.46904	9.10928	8.98848	4.94705	6.52355	4.97053	6.16997	6.27106	7.82976	6.01852	13.8402	10.2221	12.8046	24.7585	7.7545
Acta1	6.77185	6.02827	9.33758	5.565	6.26703	4.45721	21.9139	6.80629	5.72097	5.59987	7.6689	5.62207	5.77818	4.52457	6.61613	4.98928	20.3505	6.16958	7.70455	5.77776	6.22027	7.21549	5.9221	5.49876	7.15382	4.44152	5.9471	4.4182	4.83197	5.95047
Psap	11.3061	10.5305	11.8602	7.43833	7.99668	6.55778	7.63674	9.62561	9.85688	10.2688	18.4173	8.98043	7.73991	8.23177	8.75945	9.00154	9.19873	5.53971	5.62076	6.43975	15.6359	6.32	5.99908	9.4987	5.21098	6.24846	6.30479	9.08738	6.70102	6.26688
LOC100364062 /// Pkm	14.0248	5.7508	12.4247	8.77576	7.53731	4.45721	21.9139	6.96098	7.27367	7.54134	7.83001	9.52775	8.14754	7.60424	9.48276	9.3735	8.05075	9.11755	4.99797	7.86429	8.0712	19.9118	6.50713	8.42285	8.17037	7.30576	11.9675	11.6535	11.2832	8.82181
Vdac2	13.8206	10.6737	12.1917	11.4735	12.7262	8.8338	6.55337	9.05177	6.52966	5.75893	4.80112	24.2631	9.31948	9.76106	6.50444	10.7721	9.19873	7.81652	7.13269	6.56963	7.46053	7.1311	7.63612	5.70565	7.29633	11.4526	8.74397	14.3494	23.7033	4.65648
Ppib	6.62207	4.69015	8.02028	6.76961	7.04045	6.6052	23.4664	5.85321	8.66463	6.80686	8.72303	8.14084	8.70803	9.17571	6.14811	7.44921	6.00328	8.45154	5.43275	5.62692	7.65462	9.14712	7.16913	19.7284	6.56955	6.0188	6.83055	8.07046	7.26087	8.76986
Ccnd3	6.75369	8.69109	8.19503	7.84139	18.5902	7.63415	9.05865	11.3571	8.72008	5.27707	7.45255	20.4105	9.05452	8.8013	8.3393	5.98615	8.63717	5.80302	5.22515	8.7232	7.36585	8.31258	9.80687	9.301	10.7687	8.15073	5.89108	3.74746	9.59072	7.82534
Taldo1	6.36336	25.6078	4.5747	12.0873	9.21071	5.45296	5.94398	8.62263	8.56296	8.82318	5.62969	6.40852	7.80615	6.32808	6.36084	5.70841	5.49638	5.44162	6.07512	6.52355	22.7792	4.74	6.80477	6.0045	5.85226	5.36882	5.15847	4.34031	4.40562	7.91035
Dap	8.56012	23.4418	10.7803	10.7407	8.39042	9.57825	6.88225	8.22343	6.41414	8.61734	7.64128	8.94854	8.66727	7.82045	8.14784	8.41135	8.10542	8.98848	7.86123	6.61153	7.7493	24.7033	6.94333	10.3585	8.70714	7.39242	6.87365	9.04843	9.19021	10.2669
Actn4	5.41929	10.3604	4.88834	11.6384	11.6763	7.18843	7.5255	22.33	7.38457	5.33788	5.60207	10.5374	8.33607	9.34446	7.87128	8.02947	6.98229	7.73391	9.18515	8.89917	8.85701	8.24226	7.87219	8.47342	8.04211	25.1065	9.92908	7.00161	5.02146	5.52071
Tgm2	7.36643	6.23414	5.1751	8.35896	23.7135	7.85227	6.91127	7.2953	5.88733	5.7215	7.45255	6.18534	6.96541	7.69916	8.802	6.07046	8.3042	8.65806	5.36224	8.00674	5.92677	22.556	7.45138	6.28036	9.43868	5.10883	9.57139	5.48705	7.32547	9.04377
LOC100911122 /// LOC100911158 /// LOC102550530 /// Marcksl1	6.8944	12.8532	6.96734	25.2784	9.16384	11.0387	9.44556	10.3691	7.50935	8.74833	7.3835	8.68816	9.95131	7.156	7.5894	9.28919	11.1319	10.3308	6.79975	9.31815	9.50082	20.3384	8.24168	11.5906	6.89256	12.1459	13.1784	5.26635	10.1549	11.2303
Ngfrap1	10.185	25.6078	10.4488	12.6003	8.85447	7.2311	6.05038	6.42705	7.88828	7.25597	5.73556	8.02393	8.0813	8.4638	7.48303	7.71702	10.3318	9.07108	19.2673	5.84898	7.20017	7.45929	7.10755	5.8022	7.63834	11.2793	7.65797	11.026	6.05934	4.47702
Cdk4	7.19849	8.08692	7.85898	6.21998	7.5795	5.434	6.52919	5.83824	7.94373	8.71558	6.55033	6.58919	20.4173	6.07495	6.61613	8.9817	8.90055	5.55004	17.5086	5.05711	8.1422	7.55774	5.48077	6.21139	6.6218	4.57585	4.72752	5.91978	5.02576	2.74383
Ctrb1	5.17874	6.86516	4.50301	8.70248	5.57799	8.3217	7.67543	6.5019	7.02413	6.79282	5.90128	6.99304	5.40112	6.59702	6.85546	6.74495	18.0993	5.90627	5.04498	6.79588	5.85103	6.82635	7.74389	7.7516	5.22524	10.2393	2.43917	23.757	7.79058	5.61044
Cd24	5.24682	5.21376	4.54781	5.33141	4.83738	6.6052	5.6006	6.20251	5.26347	5.97413	8.5435	6.31818	5.40622	8.61673	5.94601	2.90628	5.66037	5.68427	14.4808	5.57665	4.92793	5.82772	5.29602	5.37003	5.66701	4.30286	13.6137	5.72938	4.91379	7.28696
Col5a1	11.3923	12.2579	10.8475	23.2631	10.2279	7.19791	8.01398	7.35518	6.29861	6.4747	7.2316	7.8592	6.76159	7.48295	7.12138	9.65124	9.46709	6.52581	6.25922	6.77074	8.54931	10.4833	5.55261	16.5882	8.24162	10.1093	10.9375	4.20183	5.31	5.8938
Ifngr1	12.7358	9.51903	12.1783	5.64287	10.4904	8.07039	6.56305	6.56677	9.01584	5.87121	8.41462	8.98574	8.13226	8.55345	8.3393	8.44111	20.5095	6.84074	6.69008	7.15621	7.88658	5.60267	8.50853	7.57229	6.97806	6.93744	12.0881	11.4761	11.0291	23.9152
Rgs5	10.7024	4.67672	8.38321	9.33455	5.39518	9.61618	7.48197	7.21047	5.81339	9.26294	5.18318	7.57225	21.8185	7.79935	8.4563	6.74495	7.82712	6.28832	6.69399	6.09618	8.24162	8.97834	6.57384	8.62974	8.16087	12.5532	12.7992	12.8478	19.1125	12.1937
Zfp36l1	10.1623	11.1704	8.20847	5.48714	9.7357	6.97031	6.50017	6.02287	9.34394	7.67701	5.80921	7.27468	8.32078	8.72747	6.35552	22.0302	9.91435	8.96783	6.83108	7.57519	10.031	10.3755	9.5041	11.0803	9.00641	4.94417	12.6958	8.72389	11.3349	24.1466
Fxyd1	13.5437	11.797	10.4712	7.96048	9.59508	7.12205	6.58723	9.60565	8.24411	7.41971	8.08319	10.7765	7.78067	5.81128	24.151	8.53534	8.56262	7.06791	7.57138	5.72329	6.69838	8.13911	7.43598	7.23666	7.33908	9.00003	8.48109	24.4061	13.2169	8.67069
Coro1a	8.42396	10.9109	9.94694	11.8949	12.1872	9.62567	11.1867	9.39108	5.93354	11.0313	5.10953	9.50119	8.28512	9.51321	9.32321	9.98848	9.19376	11.8642	9.54942	8.5179	8.83335	20.0712	9.81714	9.41594	9.53368	25.1065	10.2221	14.2932	13.1436	10.6778
Rps24	6.93978	5.14663	4.89282	6.22456	7.29357	5.61892	6.63076	5.86319	4.89378	5.52034	17.4046	11.2016	9.8494	10.2198	7.69577	6.34819	9.16891	9.32923	5.28391	5.37554	7.26171	7.84374	6.41989	5.37922	5.52925	10.235	12.8337	9.51579	24.7585	5.02012
Cs	12.3318	7.54541	10.4667	7.09939	9.55758	9.21314	7.80601	16.9908	5.91967	7.78929	8.27652	7.04087	7.80615	8.55345	6.39275	8.05923	8.25451	7.72359	5.06064	8.6813	10.0168	9.17525	6.52252	5.78381	6.96856	12.6832	11.5365	24.3758	6.69671	8.65652
Ptn	6.72646	7.98847	5.30952	8.29483	4.78582	7.40181	5.82791	7.85418	5.32817	5.78232	7.86684	5.08537	8.54498	6.87124	7.88723	8.52046	7.9613	6.81493	8.48794	7.96903	5.42971	5.78552	17.0992	9.15387	18.9059	11.8339	13.1784	7.78486	10.8224	5.52071
Hnrpd	8.70537	12.5712	25.0376	10.443	11.0247	9.56403	7.20629	7.66456	7.54631	5.0759	6.72985	9.007	22.5522	7.92064	7.82341	7.19131	6.4903	6.77879	7.76723	6.39785	8.40257	8.5095	6.09145	6.13323	5.5245	5.31682	7.56748	9.18258	4.53481	9.6152
Xdh	9.43611	6.06855	4.19833	5.51004	20.1183	6.83754	5.82791	5.57876	7.22283	6.46067	5.37652	7.71041	7.1947	7.01889	8.37653	5.70345	8.77631	7.75456	19.2673	5.41324	4.65336	8.12973	9.7299	6.14243	8.71664	4.47185	6.26601	6.58186	6.95941	10.0119
Dynll1 /// LOC100361920	11.6283	10.5036	25.0376	12.2155	6.98889	9.6636	6.92578	10.6086	11.8116	10.6851	8.35477	9.91567	10.3895	9.78742	8.0787	10.5886	11.1319	10.5115	9.15773	7.85172	23.5035	7.56243	8.57524	10.1654	7.41508	11.301	11.7822	12.9906	5.80095	10.6211
Uchl1	8.23333	5.01237	4.8973	5.12988	5.05769	3.63689	5.82307	5.89812	5.54536	19.4194	5.45937	22.754	6.06862	4.07634	6.22256	5.22238	5.89892	5.69976	5.37008	7.68831	7.7493	4.89003	9.89412	8.48262	9.9517	7.83441	9.79979	4.63024	4.55635	4.42507
Mprip	5.67347	22.4304	7.50501	6.01387	5.46549	9.71102	9.63418	11.901	11.2525	5.95541	7.06128	6.61576	6.21639	8.43743	8.71691	5.98615	6.75369	9.37569	7.93565	6.92577	5.12201	22.556	5.9221	8.30331	6.7263	8.83971	11.3857	5.72505	8.10065	6.18188
Ap2a2	12.1821	7.60806	11.4748	6.92992	6.70296	4.86025	6.98382	9.34617	5.87808	8.83254	19.6003	7.2056	7.10808	6.19097	7.20647	8.42623	8.77631	5.56036	8.21375	7.46206	6.22973	15.664	7.04597	7.77459	6.91631	7.59608	6.70127	6.13615	4.90518	6.08743
Ccl5	13.1216	8.20776	14.4186	8.65209	9.84819	8.151	7.07087	8.17852	7.43079	6.90042	7.2316	10.3036	7.51571	9.93508	9.31789	6.94829	6.93259	7.48093	8.17458	17.7439	9.51028	11.4304	9.85306	10.2113	5.629	9.32502	10.0756	11.6275	20.383	7.8584
Cox17	7.9837	5.47333	8.80439	17.1897	5.44205	6.24957	8.56533	6.7514	7.29677	9.01499	6.73906	10.3567	5.74761	10.2198	7.20115	18.261	7.62834	10.0469	6.96818	5.4719	8.44044	9.74255	5.79381	5.16773	7.12532	4.53685	7.55886	8.33875	3.38065	5.41209
Pnpo	8.2878	23.0838	6.3759	8.83072	9.54351	5.67582	5.8134	7.9939	6.89011	6.11915	5.96572	8.91666	6.46096	5.75855	8.97219	3.92298	23.3174	7.388	6.54123	5.46352	7.13863	7.20611	8.28273	5.68726	5.55775	4.63218	6.66679	5.77265	4.37547	5.75212
Ptpmt1	5.05165	4.87364	5.82479	7.80933	7.28888	6.02197	8.63304	7.47993	7.29677	8.40682	8.42382	7.41815	7.03674	7.25092	6.45657	6.64576	7.59852	7.84233	7.0661	8.09054	5.37764	5.27917	7.16913	10.0182	21.4472	6.61678	20.0305	6.3352	9.67686	7.29169
Psmd1	18.8722	5.29879	5.52907	7.20473	6.37953	8.83854	23.4664	11.2274	5.99823	6.87703	7.25922	7.26405	6.01257	6.72358	6.63208	5.78281	6.46545	7.15568	6.14954	6.98443	3.87228	5.49953	6.95359	4.91946	6.55055	5.45115	5.13261	6.22702	4.92241	7.66949
Crcp	10.9974	6.24309	12.7384	11.2903	10.6404	6.66684	5.78438	6.51188	6.15997	7.94835	20.01	7.68384	8.37174	7.22455	8.23293	5.96135	4.26889	7.00079	5.77352	8.58075	8.96589	8.23288	6.92793	4.91946	7.10632	19.4907	5.64975	7.97526	4.88795	6.41328
Faf1	9.92176	13.3007	7.04799	10.672	9.64664	17.2409	7.96561	7.32524	5.25885	5.17415	8.33176	7.41815	4.22408	8.63255	7.82341	4.92977	8.93534	10.7593	7.10527	8.0654	6.49009	5.46671	7.75929	6.81828	8.27012	25.1065	10.2221	12.8998	12.4589	10.8478
Arf6	25.9028	10.7274	12.6129	7.63528	7.25138	6.52933	6.38893	7.9939	6.62671	7.31679	8.58493	8.68816	8.1883	7.72025	6.73313	7.90052	9.04964	7.46028	14.943	5.69815	9.42034	9.26433	8.90368	8.48722	7.44359	10.4387	7.40371	9.7235	6.49	12.4393
Nucb2	12.3318	25.6078	13.9616	8.42766	13.1809	6.77116	4.02392	22.6344	6.7561	7.44778	7.93128	8.22586	7.06732	9.57121	8.32866	7.41449	7.7327	6.37609	8.39785	7.55424	10.334	9.38623	6.74832	8.95618	8.85915	10.417	9.98941	8.39068	12.0756	13.2752
Rab8a	4.76117	5.75528	7.39748	5.17568	4.83738	5.52883	5.62478	18.2782	5.67013	6.71329	2.81715	9.11327	6.54249	6.51264	7.03628	8.36672	8.69183	8.86457	5.82836	7.55424	5.67114	5.15258	6.31725	23.0387	5.73351	4.69284	6.56336	4.88988	4.82766	7.18307
Arhgef1	8.5692	7.60806	8.92985	8.47346	23.6994	7.60096	9.67771	11.1625	11.2571	11.4243	6.31096	7.99736	6.05333	8.82767	7.95637	6.26884	5.60571	7.01628	9.09897	6.07942	24.971	7.56243	6.45068	9.14468	5.458	7.11076	5.59804	5.59523	4.74153	5.19958
Eef2	5.23774	8.44047	10.2427	8.63377	11.92	11.418	11.1286	8.69249	23.2073	8.19162	8.92557	9.1611	8.54498	8.80657	6.07365	9.70579	9.8746	8.00238	6.49423	6.2554	7.23804	19.3632	5.93236	9.16767	6.28453	10.2523	5.05504	7.66802	7.96715	10.3
Cyb5b	6.24989	10.3246	5.20198	5.15278	11.306	6.39182	5.63445	6.21748	7.26442	6.87703	4.54794	7.43409	8.01506	8.5429	6.41403	7.83109	6.98229	6.21088	6.90551	6.74561	5.73268	4.94629	7.87219	20.1744	8.07061	7.0111	10.2394	10.338	5.53824	23.5421
LOC100912599 /// LOC679739	11.4876	5.71052	9.0105	5.1711	4.90769	8.92864	23.4664	11.3272	5.34665	7.56005	5.26144	10.1495	7.6431	8.61673	6.77036	3.76924	5.43674	5.51906	5.80877	6.34338	6.66051	5.40576	9.5041	17.2779	6.72155	8.1204	5.52046	5.48705	4.51328	4.31173
Apoc3	6.37698	5.61654	6.0981	6.04593	5.21706	10.9581	5.39746	6.79631	6.47883	23.017	6.55953	8.68285	23.9025	8.21595	8.02551	6.46226	4.14962	6.76846	5.31132	5.79033	7.52207	9.11899	7.15373	5.69646	7.75235	9.47669	6.83055	6.06691	7.35992	5.56322
Lamp2	11.533	10.978	9.26141	9.82922	12.7262	7.04144	5.91013	6.27735	7.74964	6.09108	7.6735	8.8157	7.44947	9.12825	8.2542	8.54526	8.28929	7.44996	19.0675	7.52491	8.15167	7.68902	7.40519	6.79069	9.27717	8.18973	10.0627	23.6315	6.30481	8.32594
Ptgis	8.03817	7.84078	11.7168	6.33449	5.56393	6.01249	5.72151	6.4021	7.19049	6.05366	7.86684	4.47427	7.52081	8.73802	8.685	7.7071	5.93867	7.89912	14.8647	5.68977	6.29601	6.41846	5.56801	7.07115	6.98281	5.85847	20.3796	11.8482	8.17817	8.12759
Stx4	7.00786	6.19833	7.82314	7.3513	18.098	6.55304	4.74455	9.35615	6.41876	9.74948	9.86922	5.95153	7.39342	5.95894	6.71718	12.2004	11.5344	8.02303	18.0217	10.1394	9.87952	8.8705	5.20365	7.92631	6.64555	5.97547	7.77864	8.07911	4.9827	8.27871
Emd	4.82472	22.4841	4.96451	5.99097	7.56075	6.06939	8.11071	9.29128	5.65627	10.0723	8.5435	10.904	5.67627	9.7927	8.9456	5.4654	7.70785	7.32605	6.34147	7.14783	5.63327	7.07953	4.91627	19.3008	4.81672	7.93407	5.64975	5.95007	10.6889	7.74506
Hspb2	5.22413	8.19433	5.05412	6.39403	7.5795	6.33966	6.58723	5.28934	6.0352	5.50162	6.01636	5.95684	6.13486	18.9631	6.79695	5.77785	5.60571	6.04051	4.09708	17.1992	6.76466	5.15258	6.54305	6.02289	4.4462	5.88447	6.18413	6.05825	4.51759	7.22557
Sult1a1	11.1155	8.13615	11.085	7.30092	6.40297	8.70578	10.6789	24.7651	12.9392	7.97642	6.68842	8.55532	6.01766	7.3933	8.14252	6.77967	4.76088	6.04051	5.68343	6.11713	6.64631	7.36552	6.53278	9.26881	7.19657	4.74051	4.24054	7.76322	4.65109	23.5421
Rho	5.60085	22.4885	17.4161	6.03219	7.86074	7.65312	6.76618	6.03285	9.60734	5.7215	6.04398	6.51479	6.46606	7.14545	6.02046	6.77471	7.38483	6.75298	7.56746	9.21341	6.05458	8.20944	5.23444	5.63669	6.81181	5.32549	2.79255	5.14086	5.83109	5.87019
Gja4	10.5526	6.40867	13.3432	9.38493	7.51856	9.61618	9.41171	11.3222	5.56847	7.50392	6.59176	7.60945	7.91825	8.32669	8.91901	8.35184	9.18382	7.41382	8.26859	6.98443	6.90194	10.4364	8.09798	5.79761	20.1029	11.0886	14.2989	13.8691	8.74233	24.3969
Fabp7	25.9028	12.5309	7.31683	12.1468	13.1856	11.3754	8.86519	6.94102	8.43357	8.40214	8.71382	8.19398	8.65199	6.99252	9.11047	14.1346	11.1269	13.4698	5.31132	8.15757	6.1966	8.52356	8.89855	9.46651	21.4472	10.339	6.23584	9.0268	11.5761	5.41682
Pip4k2c	10.5073	7.04417	10.9237	8.70706	7.33576	7.45871	11.6945	9.3811	8.57683	5.88524	7.21779	5.30323	6.9705	6.25425	8.83391	8.92714	7.94639	9.8042	16.733	5.79033	6.812	7.40303	7.29742	6.65736	7.46259	11.34	24.4392	11.8006	9.75007	7.1264
Cryab	8.18795	8.88801	11.0761	6.81083	9.32789	21.9731	5.27172	7.55977	6.33096	6.88639	4.85175	7.22154	5.70175	8.28451	6.53103	5.33149	20.6338	7.70294	7.44212	6.98861	10.2393	10.1082	5.99395	5.8114	7.38183	10.3693	6.22291	5.31395	8.38919	5.17596
A1i3 /// Cpamd8 /// LOC100911833 /// Mug1	5.73701	8.0377	5.27815	6.18792	7.76231	8.59198	5.707	5.34423	6.45573	23.017	6.12683	6.02061	4.2088	8.8013	6.85014	5.86216	8.95522	8.51866	5.54634	5.81128	7.08182	5.82303	5.97855	5.83439	6.7073	4.95284	5.56356	5.64283	4.82335	15.3957
Ctbp1	11.6283	8.7985	9.87973	7.83223	10.0169	7.52509	6.00686	7.71945	9.88923	9.68866	4.80112	8.13552	6.15524	24.1311	7.91382	8.18322	7.71282	8.21405	4.65328	6.62829	6.20133	15.0592	7.30256	5.8114	7.37233	6.32212	7.64505	9.10469	4.50467	7.70728
Gclm	11.7827	10.0695	8.41458	7.78185	7.60762	4.69903	9.62451	7.40009	5.36052	6.96592	5.53302	7.39158	7.17942	7.99447	6.78632	9.72067	9.31303	7.31056	7.19144	7.14364	7.11023	7.9797	10.6844	19.9169	8.46963	12.8392	22.9825	14.0378	8.37627	10.1441
Gosr2	8.8733	4.77965	11.784	5.25355	5.73736	6.12155	5.87627	22.0356	5.29582	7.17644	6.29715	6.52011	7.28132	6.61811	8.08933	3.81883	7.71779	7.166	9.38099	5.8825	9.97893	8.86113	8.57524	8.3263	7.46734	7.88207	4.41292	4.39223	5.52533	24.293
Slc9a3r1	23.765	7.66624	5.0362	8.15743	5.31549	6.30647	5.54739	6.58673	7.58328	10.2313	5.45937	10.2664	9.34496	10.1724	7.65322	6.2986	8.24457	6.91302	17.3676	7.93551	4.97053	5.97774	7.65665	10.3814	7.13007	6.33512	7.14945	5.36155	9.73284	5.80879
Myl1	12.4453	5.0795	9.27933	5.8444	6.79202	4.41453	21.9139	6.80629	6.50656	6.28757	7.84382	6.56793	5.79347	4.18708	7.29157	5.56955	20.3505	5.93725	6.09862	5.91183	10.689	8.5095	8.40589	5.63209	9.64769	4.67984	6.69696	10.2038	6.91204	8.49123
Cdc25b	14.102	22.408	11.905	6.64594	9.63257	7.0035	6.49534	7.98891	7.24132	7.21854	7.67811	8.55	5.67118	9.0597	6.86609	7.12684	6.57975	7.55321	14.943	4.39093	6.88774	7.64214	7.18452	5.91714	6.82131	5.61581	9.00254	10.6928	8.61313	9.84189
Kras	5.72793	8.60159	5.20198	25.2784	11.5403	6.68581	6.50985	6.08275	6.67292	6.47002	8.18906	7.07806	9.31439	8.43743	9.15302	11.0945	9.16891	9.73193	17.7279	8.89917	8.03333	5.28855	7.00491	6.43208	6.21328	5.55082	8.41645	5.79861	8.66051	8.66596
Prm2	2.60526	5.3525	5.26919	5.17568	5.10925	5.74695	16.3907	5.93305	5.69786	5.24432	5.34429	5.85588	5.48774	18.7786	6.25447	7.42441	4.92487	7.44479	3.78765	7.75535	6.91141	5.54641	6.62003	7.10333	5.92352	5.63748	9.01978	8.16999	9.12992	4.52425
Alcam	5.52369	8.52551	5.33192	6.9574	11.0482	7.59147	6.64043	6.30729	20.5825	6.88171	5.4916	6.38195	7.63291	6.19624	6.41403	9.61156	5.61565	5.94241	7.39512	6.80845	7.40373	7.98439	8.60603	21.31	8.40313	7.94707	6.00313	7.95362	7.88963	5.28458
Faim /// LOC100362113	8.69629	5.80003	15.373	7.20473	7.95918	6.99876	7.23048	6.84122	7.1489	6.6899	7.26382	7.53506	5.96162	8.52708	6.16406	6.56641	8.07063	7.63066	5.59726	5.32526	5.75162	5.80896	3.37159	20.9192	7.15382	6.04047	7.76571	8.79745	6.12394	11.1878
Polg	7.87477	9.78307	8.90744	10.8186	8.07168	16.7951	6.85807	6.29731	5.52688	6.1519	6.26033	8.28962	9.01885	9.90344	7.77555	5.21246	5.33238	7.16084	7.0191	7.1604	6.28181	6.30125	8.58037	7.99527	6.56005	8.57972	7.20548	19.8278	8.7897	7.98119
Enpp1	7.05325	17.6328	7.19585	8.01544	8.6201	8.72948	6.32606	5.94303	6.29861	7.92496	9.00843	9.96349	7.57686	9.60286	9.44021	5.21246	7.65815	7.04209	16.5176	7.76373	7.15757	5.81834	6.89201	7.89412	7.08732	11.7559	11.502	10.6495	6.30912	7.57504
Smpd2	8.22879	5.97457	5.09893	9.27501	8.91541	11.5271	9.87601	25.2841	7.03799	6.07705	6.17747	5.85056	7.26094	8.53236	7.28625	9.64132	6.16727	8.03852	5.51892	9.10028	6.92087	5.68706	6.09658	4.88728	21.3807	5.32982	5.79627	9.05276	4.7889	5.26569
Atp2b1	6.97155	6.4758	9.94246	4.58025	7.5795	11.1572	6.8097	9.16653	10.7349	6.46534	8.17985	8.98043	6.4253	8.43743	9.38171	12.2599	6.35115	8.77164	17.7945	8.91593	6.31494	5.70113	9.00631	8.31251	21.699	5.52048	6.38236	7.58147	9.1816	6.43217
Cdkn2c	12.4135	9.32212	13.1237	6.15128	5.73736	7.52509	7.45779	7.58971	7.49548	6.18933	7.91747	7.43409	6.98579	7.88373	7.06819	8.81308	7.92651	6.3193	9.92544	7.04308	5.46759	7.7781	7.60533	7.9401	19.9556	9.40735	4.52928	7.90602	8.61313	22.8951
LOC100911104 /// LOC100912078 /// Ly6c	5.26044	4.84678	7.26306	6.18334	5.58267	8.17945	6.97898	8.39808	6.53429	5.85717	8.44684	6.83894	6.44058	8.75384	8.22761	9.29911	5.89892	5.80818	7.41079	17.3333	10.1967	6.57317	5.15233	9.42054	8.17037	14.8628	24.4392	9.56771	13.0532	10.2339
Csrp1	9.91722	7.87211	9.51232	6.33449	7.39201	11.6788	7.81085	10.0997	23.2073	12.5751	6.09001	6.61576	6.06352	7.72025	8.85519	7.67239	7.99609	7.23828	4.82955	7.00118	5.96937	8.21412	6.65082	20.5054	5.08748	5.63315	9.45934	4.3706	9.0524	4.84538
Higd1a	8.47843	9.76965	5.50666	7.14977	8.36698	7.57251	6.30188	4.22649	9.76446	9.17873	5.91969	8.38527	7.13356	8.58509	6.4938	10.7671	8.90055	8.89555	6.99168	6.51936	5.76582	3.6851	6.10685	15.1078	18.5401	8.87437	7.86483	11.7963	10.4219	9.08155
Hpx	7.26204	7.52751	9.82149	7.87345	5.59205	13.291	8.88454	10.943	23.2258	8.10741	6.90017	5.47859	8.06092	5.38414	6.19065	6.69536	18.9938	5.92176	7.4382	6.2554	5.567	6.15122	9.08842	6.09185	7.02082	9.1127	6.0807	4.72544	6.73116	2.76272
Pla2g5	5.98664	4.66777	6.16531	7.61238	7.21857	6.65262	7.85438	6.48693	6.08141	6.2174	19.0986	5.52642	6.3081	7.2351	7.77555	6.90862	5.28269	5.55004	4.64545	6.10875	9.3446	8.56107	7.25637	6.93322	5.92827	5.49882	5.27482	20.5591	6.58474	5.75212
Dnajc3	5.52369	14.8491	4.65087	4.85965	5.0905	6.07887	20.9853	5.85321	7.22283	5.19286	8.95779	6.96116	7.85201	7.59896	6.23852	3.5907	6.3263	5.57585	5.47192	6.97605	7.44633	6.04807	8.33405	6.26656	6.27978	6.85944	6.88227	8.60705	6.32635	6.45107
Dhfr	7.03056	7.7289	7.21825	11.4644	27.0462	6.65262	9.08283	9.68549	6.26626	8.17758	6.84493	9.49587	6.91955	9.22844	6.24384	8.52542	8.94528	4.07863	15.1937	6.2135	7.12443	5.56516	6.89201	6.41369	6.17528	5.31249	4.34397	4.34896	6.73116	7.40031
Lin7b	4.78387	17.8834	4.95555	6.21082	5.4608	5.92714	7.38524	6.67156	17.6065	5.40806	6.23271	3.03953	6.70045	6.41245	3.21233	5.42076	7.49416	6.15409	8.02574	6.51098	9.66177	9.66285	7.56941	7.03897	6.76431	5.03083	4.80509	4.49176	5.13773	5.34126
Hmox1	4.54785	11.5866	9.73635	12.1697	8.00137	5.92239	6.52919	8.15857	8.84023	8.82786	15.7797	9.00168	9.14114	7.80463	8.17443	9.7901	8.80613	6.23153	8.55452	7.31542	6.43802	20.3384	8.16983	5.82979	7.47209	8.35439	9.86875	9.00083	8.53562	10.2953
Vegfa	6.21358	5.0616	8.31152	8.57423	21.0276	6.46295	7.46746	7.78432	5.80415	6.41856	7.83461	6.27036	8.4125	7.67807	6.781	9.0065	7.20592	7.98689	17.7279	9.21341	5.26403	6.48409	6.035	6.37691	5.20623	7.44875	4.57668	4.64322	7.94992	9.48297
Tgfb1	5.09704	25.6078	6.65818	8.15743	11.92	8.45447	8.99094	6.93603	6.41414	6.4326	19.0664	6.69547	7.96411	8.36888	7.9351	6.12997	9.42236	8.41024	6.97993	10.4494	7.5126	9.25027	9.40659	6.5838	9.84244	5.29516	8.17942	6.79823	6.92496	6.39439
Cpb1	6.92163	6.63692	6.9763	7.99254	5.52643	6.78538	5.66347	6.71148	8.92803	7.50392	6.75747	7.15246	5.77818	7.18237	7.17456	8.20801	24.2914	4.05282	5.27607	5.87831	4.12317	7.11234	6.99465	5.29647	5.92352	6.58211	4.60254	13.7003	6.08949	4.84066
Fgg	10.9067	4.6633	9.23453	4.75888	5.61549	6.0599	5.55223	5.81828	8.91879	23.017	7.13953	5.88245	4.40242	5.96949	6.87673	5.391	24.525	7.99205	6.97209	6.66181	7.32798	5.13383	6.38909	4.68038	6.42704	6.0448	6.42977	8.08344	5.42197	5.57739
Lcp2	8.19702	8.06455	10.8789	10.0766	8.99509	6.53407	10.3983	8.12364	11.0029	10.6617	5.14175	7.91765	8.77428	8.38997	9.02006	23.2304	8.3042	10.5838	5.36224	7.76792	6.91141	7.79217	8.47774	5.56313	6.29878	11.431	23.435	11.6535	9.44861	6.80998
Htr1f	4.44346	5.715	7.34371	5.1253	5.7608	5.44822	8.10103	7.05579	2.86973	6.90042	7.19938	6.00466	7.47495	7.40912	8.78073	5.87208	17.0755	5.50357	5.75785	6.38947	6.71732	5.25573	7.49756	5.2321	16.6305	9.55468	6.40391	5.43079	8.43226	3.23026
Cxcr4	5.43291	3.22671	5.34536	8.52385	7.767	6.83754	5.98267	5.67357	7.12117	6.50745	7.13493	8.76787	5.69665	6.84487	7.76491	5.05872	7.60846	6.61874	12.1072	16.4492	8.4357	8.4673	7.32308	4.67119	6.04702	7.63508	6.52889	7.62042	4.68124	5.55849
Vamp7	11.1835	12.6518	9.53921	12.0277	12.4122	11.1383	8.6669	8.65257	12.9392	11.0313	8.36398	8.58189	8.78447	10.262	4.76	9.6562	9.154	9.18467	8.19025	8.45086	18.6987	8.60326	9.63753	8.901	8.7784	5.82381	21.8879	10.3639	10.6846	13.4405
Fbxl20	6.46775	4.95867	2.47777	7.61238	7.80918	6.38708	17.5853	5.73345	7.0195	8.83722	6.14064	7.21622	5.89538	7.33529	6.07897	18.6329	5.93867	7.22279	7.78289	6.93415	5.27823	7.61869	6.75345	6.42748	6.15153	2.71258	6.45563	4.49176	6.63642	4.82177
Crx	5.3149	3.62054	5.52459	5.31767	6.33266	6.07887	5.83758	6.95599	6.3633	16.7856	8.07858	3.63468	7.62272	5.55816	5.85027	6.12501	7.44446	5.44162	7.72414	5.97887	18.5993	6.10902	6.66621	5.44359	8.25112	5.58115	7.64074	5.8592	5.85262	5.89852
Ctrl	4.65678	6.96362	5.09893	8.20323	4.91238	5.86075	6.20515	6.48194	6.50194	7.36357	6.67922	20.9844	6.79726	6.98198	7.07883	5.95639	5.22802	6.14376	6.29839	5.83642	5.25456	7.91875	6.60976	6.11944	7.28683	4.64518	14.3765	2.89498	5.31861	4.67537
LOC100910229	11.6283	10.8751	11.8826	9.33913	10.931	10.887	11.5688	11.8062	7.36609	7.86882	8.1016	10.0485	8.27493	8.36888	7.98828	7.17643	7.90166	8.55996	7.03476	7.14364	7.26644	24.7033	8.73433	9.99984	10.4837	5.85847	22.1508	9.16527	11.0076	7.83479
Lst1	8.18341	7.36192	11.5062	8.3498	4.76707	7.74321	7.59804	8.07374	6.83928	6.37646	20.498	6.56262	8.51441	8.60091	7.80214	6.6904	7.81221	7.87847	6.63524	8.72739	9.08897	8.00783	6.00421	6.62978	9.78544	9.31202	24.4392	14.1677	11.6062	13.2752
Cttn	7.67506	4.74833	7.37059	7.07191	6.80608	7.70053	8.44442	4.10673	5.7071	19.9247	5.56064	6.95585	6.01257	5.94312	6.13215	8.1733	8.55268	8.04884	7.46562	6.12132	6.20606	6.75134	23.9707	7.77918	4.70746	9.38136	6.19275	6.23567	6.73116	5.76157
Mgea5	19.8753	5.97904	5.29159	6.1696	8.36698	9.01873	9.72124	6.61667	7.17662	9.18809	7.34207	10.0698	6.81764	5.748	9.61572	6.87886	8.05075	8.61159	15.8282	3.94681	8.4073	8.61733	8.42129	5.28727	7.30108	5.71981	6.23153	7.919	8.89737	7.67422
Cav2	24.3505	7.39325	4.80769	7.58031	6.47797	5.31071	5.63929	7.83921	10.014	8.03256	17.1192	8.55	5.91576	7.99974	5.8875	7.95012	6.28654	9.1382	8.09233	6.55287	8.13274	7.46866	6.20948	4.96084	6.11353	4.97883	4.1759	5.13221	6.33496	5.73795
Mcl1	5.55092	7.64834	9.53473	19.6172	8.57323	5.35339	6.80003	6.09273	3.45199	8.44892	8.83811	8.5872	6.6444	6.8976	5.94069	8.32704	11.0921	12.1636	18.0217	7.84753	9.25939	9.60659	6.51739	6.26656	4.89747	6.93744	4.47757	7.88438	7.07138	7.70255
Gtpbp4	26.0072	8.89696	8.58932	5.37263	5.74673	7.34016	6.87742	7.70947	5.65627	8.65476	5.02207	4.57524	7.68386	5.92202	8.5414	6.55153	7.72276	8.58578	9.32615	7.91456	10.0689	8.67359	8.44182	21.1859	7.7191	12.5836	10.4462	8.62868	11.8043	7.82062
Glrb	6.86262	4.72595	5.10789	8.49636	8.13261	20.1949	8.65239	6.00291	7.63874	8.83722	10.0441	5.98341	7.36795	6.30698	8.03615	5.024	5.19323	5.61715	3.61139	6.21769	5.73268	6.58724	8.30326	21.3928	5.96152	5.27349	6.47286	7.39107	6.78284	7.57977
Acmsd	4.75663	7.68414	7.7156	8.59713	23.2729	8.94286	7.17727	5.99792	7.08882	6.16126	5.60667	6.58388	7.72972	7.27201	7.50962	7.36985	8.44335	7.64614	7.73197	5.30431	25.1083	7.04671	8.59064	5.93094	10.745	5.52048	4.19314	7.58147	7.09722	10.725
Hp	9.72205	6.25651	9.66915	6.41693	5.62017	8.33592	5.77954	8.45297	11.1785	23.017	6.60557	5.51047	7.83672	9.69778	7.85532	8.90731	4.95469	8.60643	6.09079	5.761	6.38122	6.04338	6.79451	4.79992	6.32254	6.17913	6.43408	8.10941	5.15496	14.8431
Asgr1	10.3711	9.25499	5.1751	7.64902	7.53263	8.63465	9.23276	10.2044	4.56568	8.9916	5.0681	8.79444	8.06092	8.43743	9.66359	7.84597	7.71282	7.46028	6.31797	8.5975	16.0619	8.59858	8.8421	10.2527	10.4362	21.7136	12.1829	7.90602	9.5778	8.70847
Lyz2	13.5437	25.6078	13.3432	9.03683	12.8481	8.06565	9.64869	8.57273	8.24873	6.43727	6.53652	9.24612	8.55517	8.01556	8.58927	8.59982	7.92651	7.73391	8.7347	7.44949	24.971	7.54368	9.62213	10.3676	10.0895	10.092	11.1918	13.6094	7.45036	11.9387
Col1a2	13.1216	10.5439	12.6712	10.6216	19.912	9.79637	10.2097	11.3022	12.9392	8.51442	8.76906	10.176	9.93093	10.589	8.5999	9.44294	9.21861	8.2915	6.79975	6.26378	11.0819	23.9063	9.66318	10.3079	9.28192	9.39435	12.0537	11.8136	5.50379	11.0981
Prnp	7.94739	9.18338	5.41705	12.7056	23.8353	6.75219	6.34541	6.96098	5.80877	6.12383	6.29715	8.70411	8.83542	8.40052	8.29143	8.89739	6.7189	10.5477	17.8298	7.64642	7.01082	9.61128	8.09798	8.60676	8.96365	4.63218	10.3773	8.5681	9.12992	8.35427
Myh10	9.99892	8.95514	9.9559	9.73303	10.4201	6.51037	6.76618	6.23744	3.31798	8.65944	7.93128	7.49255	7.91315	7.00834	7.70641	7.38473	10.4213	9.64416	8.57802	8.59331	8.0712	15.8188	8.42642	6.72633	6.28453	21.7136	6.08501	6.81986	9.00503	9.08155
Ccdc80	13.3168	8.91934	14.0557	9.27501	9.8107	7.00824	6.13744	7.52983	6.7561	6.87703	7.87144	4.89938	9.23796	8.1263	8.53076	6.73503	9.5963	9.27243	8.62503	6.65343	7.68776	8.31727	8.05693	8.67112	18.9059	7.0111	9.86444	10.6322	22.2219	11.9623
Sdc2	10.0443	9.34449	12.828	6.80625	4.80926	22.9119	6.64527	6.16259	7.01026	9.70737	8.387	7.52974	9.24305	6.84487	9.27002	9.6562	7.85197	6.60325	8.33518	5.22889	6.33861	7.62338	9.75043	8.23435	9.31517	12.6962	12.7044	24.0599	11.0636	7.4617
Ywhaq	24.3505	5.46438	5.32296	7.45665	8.2123	7.02721	7.84954	5.58874	6.71451	6.63844	7.32826	9.02825	5.73742	8.53763	6.45657	8.11378	5.99831	9.60802	17.4694	5.01102	8.21795	8.56576	9.10382	6.08266	6.84981	7.50075	5.95572	6.17942	8.09635	5.97881
Trak2	7.20757	18.5861	10.0679	7.3971	7.83731	6.23535	6.75167	7.28033	6.07217	6.15658	9.52398	9.68186	8.90676	10.5837	7.95637	8.13362	9.10431	8.41024	15.4091	5.34621	8.95642	8.90332	8.79591	8.47802	6.84506	8.29806	4.74906	9.23451	6.25313	9.19017
Cacnb2	4.76571	8.05112	5.892	8.84446	4.99206	5.85127	7.29819	6.82126	6.57588	8.46296	7.40652	7.0143	6.41001	7.98392	7.56813	3.66013	22.3731	6.71167	6.19263	5.36297	6.78833	5.77614	6.38909	8.22975	6.79281	5.25183	4.56376	6.5083	17.2521	7.49948
Rab4a	6.43144	4.87364	7.74248	7.82307	8.31073	6.53407	22.088	8.27832	7.83745	8.12612	7.35588	9.04951	7.745	9.19153	7.07883	7.00285	6.74872	7.35703	5.15073	7.64642	7.34692	7.78748	6.54305	7.01598	6.87831	23.4296	5.85661	10.4332	7.45036	10.9186
Ptprn2	6.99425	5.62549	5.78446	4.04436	6.14047	6.39656	6.40828	5.80331	6.42338	17.2347	17.8926	7.84326	5.6508	5.52652	6.68527	5.44556	8.15014	3.94956	6.65874	6.10456	5.80842	6.92481	8.45208	6.15162	7.11107	5.19983	4.91714	4.54802	5.87846	7.55143
Cfl1 /// LOC688430	10.3529	10.4678	5.9592	10.0307	20.4417	7.89494	7.70928	6.93603	9.0528	7.64426	8.75065	7.25874	8.99338	8.86458	8.42971	9.26935	11.4649	8.84908	17.7279	9.65334	7.55521	5.57923	7.57967	6.43208	6.75955	8.37172	12.0321	12.2896	8.04897	12.5857
Psmb9	9.2591	10.0695	13.1819	12.2476	10.6404	9.61618	10.5096	11.3072	6.5805	11.0313	8.5343	10.0273	8.26474	9.67141	9.32321	8.5651	9.17885	6.57228	17.3676	7.55424	10.2156	10.2395	7.82087	6.57001	9.49093	8.34572	24.4392	10.9481	7.87671	10.0827
Tra2b	7.73407	4.85573	6.42967	5.56958	5.74673	5.77066	5.99235	7.85917	7.72192	10.1284	5.30747	8.41716	8.22397	6.94506	8.16911	9.45285	9.76526	23.8471	11.0378	4.75544	6.58004	6.20279	7.0357	9.46191	5.62425	21.7179	8.58452	7.38674	12.7991	8.40622
Azin1	7.3392	4.67672	4.88834	16.8004	4.75301	6.97031	6.72749	7.18054	6.62671	7.29807	5.71715	8.59783	6.06862	9.25481	8.17443	5.69353	6.27164	3.72756	5.98112	5.89507	5.6238	6.42315	6.0196	6.11484	5.515	14.0742	11.5064	9.32971	4.1946	24.2694
LOC100365697 /// Ptp4a1	10.2349	7.96609	11.56	6.48105	6.81546	5.62841	21.2175	7.11567	7.05185	4.39756	6.42144	5.91964	6.15524	7.54096	20.46	5.49019	6.29648	7.47061	6.59999	5.8825	5.18355	8.11567	9.06276	5.48497	9.34842	5.58548	6.39098	5.99334	9.34094	3.23026
Pias3	8.36496	4.84678	11.6048	6.71923	7.34982	6.37286	6.5969	3.37819	6.23391	5.87588	5.51921	7.27999	8.05582	8.03138	6.45657	7.11196	5.82934	22.1898	5.93411	6.59477	6.35755	7.37958	6.25567	6.98839	6.84031	4.09053	4.69304	20.3687	8.31598	7.42864
Trdn	6.86716	5.80898	6.7926	7.00778	8.81228	21.6506	4.85095	6.66158	6.95943	6.98931	6.88176	6.30755	5.62022	21.6209	6.80227	5.33645	3.84647	6.69102	6.20438	7.54586	7.21911	8.83769	7.2769	6.74472	8.77365	7.38809	8.93359	6.38713	7.22211	5.55849
Nucb1	6.77639	7.76918	4.78529	8.30857	11.5825	6.44398	8.57984	21.362	8.60455	10.4372	5.45017	6.47228	5.89028	7.40385	6.89269	5.2075	9.76526	9.01946	9.53375	8.52628	10.7221	24.7502	8.23141	6.41369	8.08011	7.54408	4.52066	6.14047	7.07569	3.24442
Glud1	6.66292	7.85421	9.34206	12.0094	11.7231	9.71102	8.5218	18.0387	8.91879	8.55184	6.3616	5.85588	6.36925	16.4372	7.3288	8.17826	6.92265	6.75298	8.49969	8.5975	7.55047	7.28582	9.65805	5.43899	10.6832	5.67648	6.1281	4.9721	5.62438	8.71791
Pla2g16	12.4635	9.58168	13.1147	9.10554	8.54979	21.4278	8.02849	6.26737	6.15073	6.27821	9.33986	8.84758	8.38193	9.69778	7.29157	6.90862	7.37489	7.75456	5.01756	7.34894	7.25698	8.61733	7.70284	7.97228	9.35792	12.8392	22.1637	12.3415	6.6881	11.882
Pgap2	6.73554	5.10188	7.16449	5.51462	5.18425	6.85651	6.41795	11.3771	22.9208	7.88753	7.06128	7.26405	8.60103	7.46186	7.56281	7.56328	5.77965	8.77164	8.48794	6.20093	7.50787	6.02463	6.54818	6.61598	6.82131	7.94707	7.95102	6.10585	7.69583	22.4276
Slco1c1	5.08796	5.14216	5.48426	7.08565	7.69669	6.02671	5.42648	6.19253	6.29861	3.77067	6.00715	7.07275	7.04694	6.15933	7.41921	5.54971	5.81443	6.64972	4.6572	19.2355	6.92087	7.46866	7.45651	5.92634	5.14448	4.68851	6.56767	13.6354	4.21613	7.71672
Atp5g2 /// LOC100361833	6.3452	11.2689	4.81217	10.0903	12.8481	5.42926	5.72634	5.70351	7.09806	7.19047	8.99922	8.16741	8.38193	7.76244	4.24411	10.6779	10.6399	10.8677	17.3676	9.87121	7.55521	6.40439	6.45581	7.17689	5.6385	4.32452	7.25288	6.45204	13.9576	11.3059
Nr1h2	6.53129	7.89001	6.17427	5.4734	6.29984	15.9606	8.02365	8.25337	5.50839	7.75186	7.99573	6.10563	6.89407	8.26341	6.46189	5.49019	9.25837	9.14336	17.3871	8.74834	7.78243	8.28445	7.91837	6.33093	7.42934	8.76604	6.09794	8.55079	8.81124	5.7049
Klf9	13.462	5.10188	11.3449	5.33141	5.84517	7.26904	7.55935	6.73643	7.99919	5.37063	7.85763	7.30656	19.174	5.88511	7.28093	8.01459	8.99498	7.10405	8.42135	7.7763	15.2193	6.24967	7.22045	7.19988	5.66226	3.13723	8.67071	10.8183	6.90773	8.0473
C1qb	12.7358	8.38677	13.3208	9.73303	12.4122	7.60096	10.1565	11.427	11.0075	11.1576	9.09128	9.63935	8.78956	10.6997	9.79655	9.74547	9.02976	7.60484	17.3676	8.37544	8.11854	8.61733	8.6163	6.80449	8.58364	25.1065	14.2989	9.2172	12.0756	11.3578
Ldhb	6.09103	8.13615	5.86959	7.61696	8.6576	21.9731	4.85095	6.69152	7.09344	6.0022	7.90827	5.98341	6.48644	20.677	5.7705	10.1571	9.22855	6.15925	4.85696	5.49704	5.81789	7.77341	7.54888	5.09417	8.68814	6.74678	10.9806	6.26597	7.33839	8.1937
Cyba	11.6283	8.48075	12.1917	9.40783	10.0451	6.72848	7.75765	6.81128	7.30602	7.7004	8.11081	10.277	7.76539	10.4941	7.37134	8.60478	7.49913	8.06433	19.0675	8.48019	9.01796	11.4304	9.70937	6.80449	10.5787	11.483	22.6938	8.72389	12.3469	13.2374
Scpep1	12.9264	5.51808	11.905	7.92841	8.6951	7.89494	7.04185	7.23043	6.72375	6.40453	6.11763	10.6171	6.77688	9.07024	8.26484	7.5484	8.43838	8.07466	17.0268	6.77074	6.45696	8.89863	9.51949	6.50104	8.46013	11.7559	10.8556	6.11018	10.9387	22.5362
Arfrp1	5.06073	6.97257	6.33109	7.09939	5.50299	4.8318	9.35851	7.17555	6.52966	20.5843	7.45715	8.85821	8.12716	4.87789	7.92978	7.19131	5.29759	5.84948	8.19808	15.7998	3.84861	6.35751	6.2454	6.92402	5.76676	7.80841	7.88207	7.66802	4.88795	11.0934
Srprb /// Tf	9.9853	5.62549	7.62599	6.2841	5.2405	6.03145	7.26433	8.52782	6.52504	22.7597	7.2362	6.73266	7.89787	9.69778	6.35021	8.29729	8.9254	4.86854	5.48367	7.49558	6.02618	7.15923	6.79451	5.25968	6.59805	7.63508	5.88246	5.35723	6.78715	14.8431
Ivd	11.1336	12.6518	11.6316	8.63835	6.12641	6.81858	8.63304	6.52186	8.85872	6.3016	5.42715	10.1442	10.5933	11.1585	8.08401	8.50559	20.6338	7.16084	7.09743	5.37973	5.9457	5.28386	8.28786	9.28261	8.04211	8.56238	8.79999	17.6555	9.97401	7.64588
Fgf12	5.46014	5.63892	5.4977	6.05967	6.0561	6.1737	6.28253	5.97796	5.70248	5.57648	5.33048	6.81237	20.3867	6.15933	6.64804	7.76166	8.13524	3.19579	5.46408	6.20093	7.78243	7.67027	6.74319	4.78153	4.35595	4.50652	4.73614	4.31434	5.38321	15.7876
Dbi	9.16832	5.28089	9.3331	5.48714	5.43737	6.48192	7.07571	7.37015	20.9106	4.86538	6.93699	7.17903	5.64061	7.3933	7.74363	5.89192	19.7591	6.48451	3.38029	5.46352	7.45106	7.6984	6.04526	6.68495	6.65505	6.06213	6.92967	4.16721	5.36168	8.31649
Ppt1	5.39206	5.20929	10.1889	7.16809	6.55765	6.95134	7.60288	7.18553	6.45573	6.9051	8.23049	5.64864	6.84821	8.41107	7.21711	10.5787	10.8437	11.3427	7.44212	7.83496	4.91373	7.43116	21.7948	6.11024	7.56709	9.17336	5.31792	9.11767	18.768	5.28931
Hadh	5.26951	7.91686	4.83905	5.34515	8.54979	8.78639	7.49164	11.2274	8.67387	16.678	7.71033	6.98241	7.81124	5.0941	6.07897	9.14536	5.37711	6.05599	6.14171	5.5138	8.28895	6.65288	7.91837	9.42054	4.84047	9.1257	8.42076	19.5552	5.27124	5.72851
Hba1 /// Hba2	9.5405	7.87211	8.42354	6.9803	5.31549	8.97605	6.57756	10.7583	8.48903	23.6018	5.59747	5.76023	7.50043	8.8013	8.19038	8.67421	18.5416	8.04368	7.05043	7.23162	8.49724	8.1016	8.01074	6.20679	5.5625	9.58935	11.2435	5.19712	9.707	3.07441
Cyp2c7 /// LOC100911552	8.90961	8.97304	7.11072	9.96204	5.74673	5.87972	6.34541	5.28934	4.79674	20.1726	7.93588	7.84857	6.62402	7.64115	9.16897	6.14485	7.45937	6.6239	6.0007	6.26378	5.68061	3.72261	22.4978	5.28267	7.62884	5.78914	10.3169	8.74119	12.2091	5.29875
Rps23	5.93671	5.62549	5.34536	5.12072	4.93113	7.06989	6.64043	6.49192	3.1932	6.30628	6.66541	5.41483	6.76669	7.51459	6.35552	9.69091	7.19101	26.7228	6.09079	4.89371	5.16462	5.56985	6.53792	6.9792	6.27028	9.56335	6.27032	5.16683	21.0419	5.58211
LOC100359583 /// Ptma	5.60992	8.17643	8.06061	6.72381	9.01384	6.79487	6.86291	5.66858	6.15535	6.54487	9.22017	8.81038	8.48384	9.76106	7.15329	7.18635	6.55987	8.18308	17.3676	9.82093	5.28297	6.18404	6.89201	7.17689	8.08011	12.7136	10.2221	23.1815	14.0265	5.65295
Ctsl	5.64169	11.7925	7.04799	12.2476	11.9435	6.84703	6.67912	8.77233	5.12484	3.81745	8.32716	7.60414	6.95522	5.04137	8.47226	9.2148	20.6338	8.58578	5.87536	9.02068	6.03091	5.86053	8.00048	9.4849	9.08241	10.1657	12.6441	11.528	20.7017	8.71791
Calm2	10.2259	8.0556	23.8637	5.34515	7.32169	6.46295	21.6382	7.38512	4.49636	7.40099	7.98192	8.06644	8.4125	7.29838	8.66372	6.00103	7.16616	9.21048	5.48759	5.43	8.33156	5.56985	7.04083	5.54014	5.69076	8.16373	5.92987	4.20183	9.61226	7.46642
Pmp22	11.6283	10.4812	12.9176	11.8949	8.87322	6.52459	7.34655	7.63961	7.17662	7.53198	7.13033	8.60846	8.4125	7.89427	7.79682	19.6298	7.05186	7.17116	6.58432	6.18836	4.89006	9.0346	7.63099	8.35848	7.51009	9.19936	11.2392	14.1677	23.712	13.3933
Fxyd6	4.94272	5.07055	5.39465	22.6997	7.30294	5.56677	6.53886	6.21249	6.12763	6.72733	7.14874	5.65395	6.5323	7.55678	7.85532	5.36125	8.52783	6.17474	17.3989	5.55989	7.68776	6.07151	6.19922	5.67807	5.26799	10.157	9.36023	6.77659	4.3281	7.10278
Rpl22	9.19101	10.338	6.78812	12.2476	5.98579	7.67683	9.67288	6.77635	5.71634	6.35307	6.84493	9.38959	8.94752	7.4724	9.16897	7.41945	11.5344	26.7228	5.3975	7.36989	10.0641	11.6273	10.0019	8.29871	8.51238	11.301	9.68775	10.6798	20.3959	9.25156
Pla2g1b	9.51781	7.44695	10.0545	7.43375	5.2405	6.21164	6.41312	6.08275	6.48807	7.60216	6.49049	6.11626	5.89538	7.82572	7.24902	22.9626	5.14354	3.51072	6.39239	6.65762	5.58593	5.27448	6.5995	5.97232	6.6028	5.52915	4.53359	19.183	6.10671	8.60929
Bzw2	7.27565	5.03922	8.30256	5.4734	3.02336	7.56302	9.19891	8.35317	6.13225	5.87588	8.35477	6.06843	6.2011	6.80268	6.69059	5.58938	8.6322	7.89396	12.3813	16.0261	5.29717	5.88866	6.25567	6.12864	7.87586	9.33802	6.4901	5.78563	3.05336	10.7675
Pth1r	11.2652	9.52798	11.5779	8.25819	24.1541	8.1178	6.80487	9.01684	5.95664	6.61505	8.32716	10.2239	8.1985	10.589	8.70095	7.32026	8.47814	10.3308	10.2114	7.68831	8.93276	5.65893	8.21602	10.9194	21.0672	4.74484	8.7569	10.3899	6.36511	6.5833
Add3	11.4196	10.4186	8.48627	10.7269	9.47789	5.93188	7.21113	7.79929	6.68216	7.05012	7.16715	7.63602	6.84312	8.31087	7.08415	8.03939	7.74761	19.9698	6.22005	5.77776	6.85933	8.16724	8.58551	4.30338	7.91386	10.4777	7.11067	10.7967	22.2606	11.3531
Rps6ka1	11.7827	17.5075	9.66466	5.98639	6.11235	6.55304	6.1713	7.16557	7.44465	7.40567	5.27525	7.45003	7.02655	6.33335	7.67981	7.85589	5.86413	6.12311	17.3871	7.84753	6.40015	4.58528	9.65805	5.68726	8.63114	4.75351	7.28736	10.8789	4.78029	3.09802
Mtdh	5.9004	12.3609	5.16614	6.23372	10.0498	6.21638	5.79405	8.40307	5.85498	8.50038	9.45033	8.42779	8.16792	8.8013	8.63181	9.6314	9.42733	9.30857	19.0675	8.24556	7.78717	8.68297	7.86192	6.80449	8.08011	9.32502	21.8879	10.3639	8.90167	10.6258
Syne1	6.2272	10.2754	4.75392	7.78185	11.3247	7.08411	6.93062	6.23245	15.4115	6.26418	7.04287	6.45634	16.9932	6.60229	7.50431	6.98797	7.00217	6.23669	7.22278	2.86165	6.49483	5.06819	6.74832	8.06883	5.13973	9.40735	9.07149	8.78447	4.50467	6.21966
Arrb2	8.80068	6.14015	11.1567	18.7744	9.63257	5.26804	7.17727	7.91905	9.13598	5.23964	8.29493	9.15578	9.57425	7.35111	8.89773	8.10386	8.32408	6.32446	5.44058	17.283	6.19186	4.50558	8.32378	5.93554	9.96595	4.83151	4.98178	6.77226	10.0989	12.2787
Cyp1a1	4.72032	7.1471	4.91074	7.13145	5.56861	7.37336	5.63445	3.79236	6.95943	7.21386	6.87715	7.12058	8.32078	7.42494	7.39794	6.74991	18.8646	6.56711	5.61684	7.19811	7.00135	8.00783	7.32821	4.8413	8.50288	4.30286	11.1487	5.40483	23.1822	4.76982
Tcam1	6.18181	6.06855	9.33758	5.73905	5.75142	17.1033	3.96104	7.3452	7.2598	19.368	7.65049	6.9399	8.42779	6.5021	6.9246	10.0976	9.14903	9.97458	4.3791	7.27352	7.41319	9.06273	6.98438	5.56772	4.3797	6.15746	4.83525	5.91112	6.4297	6.71553
Atp5b	9.60404	9.11177	9.45856	9.05516	11.02	8.33592	8.83134	11.4519	23.2258	12.5751	9.04065	6.67952	6.21129	7.18237	3.73886	6.84414	6.67914	6.37093	5.72652	17.0735	8.10433	9.17994	8.19549	5.48497	7.21558	4.71884	4.78785	4.48744	7.39438	8.50539
Slc25a3	6.07742	7.73337	6.23252	7.71772	8.74197	23.8318	9.10218	11.4869	8.10547	6.29693	7.53541	9.32051	7.68386	4.11325	8.87114	6.8739	6.35115	9.82486	6.89376	6.99699	7.18597	7.26237	7.08189	6.33093	8.78315	8.28506	5.84368	5.72938	8.60452	14.5031
Atp5d	7.0351	6.66824	7.29442	7.9788	5.9061	8.33592	9.62935	11.5368	23.2258	12.5751	7.33747	9.09733	8.09659	9.84543	6.28107	6.78463	6.58969	5.93209	17.7201	10.5541	9.0511	6.66694	6.17356	7.26885	5.48175	5.31682	10.2566	9.38164	10.3228	5.40265
Hprt1	6.90347	4.58721	10.8744	9.93914	4.65926	7.43974	8.15907	10.1895	20.37	7.54134	6.60096	10.1601	4.94763	8.50072	7.94573	6.69536	6.67914	8.5961	8.17067	7.31961	7.24277	5.90742	6.38909	8.15619	7.82835	14.7328	8.98099	12.3415	24.7585	9.99301
Fabp5	4.74302	6.10435	5.32744	5.39095	5.67642	6.31596	9.02479	6.7514	8.63228	9.46878	6.17287	6.95053	7.01636	8.01556	6.12683	10.2265	9.81496	9.10206	7.05043	5.11158	11.6026	11.3226	8.71893	20.7721	6.39854	11.327	24.4392	9.56771	14.0696	8.86431
Csrp2	9.50873	23.4418	14.3379	9.97121	8.39042	8.80535	6.82421	6.97595	9.12212	7.53666	8.70462	9.19298	7.35775	8.51126	8.21166	7.36489	5.99831	9.52025	5.60901	6.2973	24.0432	9.77068	6.97925	8.46423	8.55514	13.8402	13.6697	12.718	10.0128	10.8195
Calcoco1 /// LOC100912282	7.44813	4.68567	12.0842	8.20781	7.70606	4.16322	6.13744	7.22045	7.67108	19.5691	8.59874	9.79876	6.56797	8.15267	6.26511	6.54161	8.57753	9.74741	5.85186	7.60452	6.13979	6.52629	6.64055	6.75851	6.6408	11.8859	12.0063	22.0867	11.5244	7.74506
Slc38a2	5.43745	7.53198	6.02193	6.27494	5.77954	6.51037	3.4774	3.89715	6.28474	5.42677	8.20287	5.56361	6.17053	6.19097	20.2313	9.83474	6.35115	9.49444	7.50871	7.69669	8.41203	5.13383	10.9153	18.3261	8.9399	8.92204	8.15788	10.1519	8.10927	5.2043
Klk1c9	5.00173	5.67472	5.08101	7.58031	6.12172	7.01773	7.37557	16.9908	6.28937	5.75425	8.3916	6.11626	6.85841	7.66752	6.80759	5.54475	5.7051	5.96306	5.64035	7.0766	3.04859	5.81365	6.15303	3.33788	19.4949	9.39435	9.99372	5.97171	6.4254	4.33062
Tubb5	8.29234	17.6328	11.9139	10.0491	10.9825	11.4228	11.4527	9.1815	9.38553	6.54955	8.63557	8.23649	9.36025	8.77493	9.57849	8.45103	7.89173	8.46703	16.2512	8.2707	11.2287	11.1725	6.97925	10.9194	4.94972	12.5966	11.1918	14.1677	7.72598	12.6282
Cdc20	10.3711	10.6065	10.1575	12.898	8.77947	6.79487	7.26917	9.44098	7.5648	5.98816	7.21779	7.39158	7.15903	8.47962	8.37121	9.83474	9.5466	8.25536	9.30657	16.9059	5.17882	8.54231	7.78494	7.98608	7.89011	23.4296	13.8464	7.69831	10.999	7.73089
Nme1	11.6783	10.0963	20.221	12.559	11.3247	21.0058	6.28253	6.18754	7.56018	6.4326	8.00493	8.55532	7.03165	7.29838	7.97233	7.55832	8.38869	9.61318	6.34539	6.06686	7.75876	6.46534	8.70354	7.19528	4.62671	14.0049	13.6827	10.3769	9.1127	13.5444
Scp2	11.5603	7.04417	12.7652	8.95897	5.5733	22.9119	6.68879	8.62263	10.9521	8.10741	7.78398	6.6689	8.12206	4.78824	7.39794	5.86712	8.85583	8.60643	6.19655	6.1297	7.86291	8.59858	6.41475	5.64129	7.7476	9.71934	6.33927	9.19556	6.57613	15.4759
Plk1	8.57828	17.6328	10.041	10.6995	10.9497	7.26904	5.38779	7.6945	7.47238	7.36825	9.17414	8.73068	7.18961	7.31947	8.27548	8.69901	6.91271	6.90786	6.2788	8.74415	8.41203	6.02463	26.0747	9.02514	6.37004	6.9851	11.14	6.4304	12.9412	12.7463
Aldob	9.64035	5.05712	11.2911	6.45815	7.767	10.9581	5.47968	8.52782	23.2258	8.10741	6.64699	6.095	8.04054	7.16655	6.27575	7.53848	8.9254	4.67752	6.58432	6.81683	5.89363	6.52629	8.28273	5.67347	5.58625	4.51085	4.89128	8.04882	4.61664	14.8431
Yif1a	24.2007	5.41068	4.52093	4.95583	7.0592	7.08411	6.80003	9.1815	6.31709	6.732	8.15684	7.91234	6.34887	8.75911	7.36603	6.75487	7.47925	8.39475	18.0804	5.41743	8.51618	5.48077	8.00561	10.9561	5.40099	4.34619	9.51106	9.20855	5.22817	8.8407
Pex14	9.06847	4.94077	22.3493	5.24439	5.82173	7.38284	5.74085	7.98392	5.86884	6.38581	8.29954	7.26936	22.435	7.55678	5.03124	6.08038	8.24457	9.04527	5.00581	5.67301	5.18355	6.69039	7.46164	5.73784	6.50779	13.4979	8.67502	8.77149	13.9016	5.4546
Dctpp1	12.1004	10.6781	8.52659	8.0933	10.8325	8.97605	6.2245	7.04082	8.81251	8.67816	8.29493	9.52244	6.3132	9.6134	8.63181	6.37795	7.48919	19.882	9.17339	9.7497	6.69365	6.48878	6.87148	6.68955	7.08257	19.508	12.1829	10.8962	11.9766	6.19132
Eif2b1	9.59497	6.77565	5.44842	5.565	5.10456	6.21164	7.39975	5.29433	20.1666	6.4326	8.65858	7.84857	9.42649	8.73802	9.19025	5.6241	5.80449	5.2351	3.85032	6.53192	8.59192	8.83769	5.74249	6.02749	7.27258	7.83874	6.70127	23.6315	9.39262	7.23502
Hspbp1	8.41488	6.65034	8.07853	4.96499	5.21706	7.16946	5.90045	5.56878	5.23113	6.53084	8.61255	8.31619	5.57946	5.57398	7.41921	7.82613	4.88015	9.10206	6.741	18.8961	6.49483	5.39638	6.75858	10.4504	5.16823	4.81417	6.809	19.0359	6.66657	3.75446
Ppif	5.30583	5.56284	8.66549	10.3422	8.02949	6.25905	7.62706	8.60267	6.00285	6.6899	7.76557	6.69015	7.28642	8.09466	5.75986	9.27927	6.12752	9.22081	5.91845	8.60588	19.6928	7.78279	5.50129	8.34009	5.04948	4.33752	20.3796	4.63889	5.76649	6.76748
Pbld1 /// Pbld2	10.5935	11.3584	8.4325	6.35281	10.7763	6.91815	7.37557	7.05579	7.71268	7.54602	7.90366	7.64665	21.523	7.156	6.61613	10.8762	10.0485	11.0123	8.85221	8.18271	10.476	6.51691	6.05553	9.39755	6.75005	21.7526	8.74828	5.76832	4.63387	12.1418
Stk16	8.53289	7.35744	8.12334	8.18033	7.68731	6.76642	4.25123	6.39212	6.83004	7.75186	17.308	6.74329	5.5387	8.39525	6.8395	8.13362	6.80338	8.3328	8.14717	5.54732	15.314	5.92617	8.10312	6.04588	8.33663	7.08476	9.69206	4.51773	9.59934	4.94928
Thop1	4.55693	11.3718	4.39099	12.1697	12.4122	5.78488	6.97414	7.27035	5.61006	5.96477	8.28573	6.85488	8.75389	7.62533	7.15861	9.58676	7.3401	6.5413	8.19025	5.32945	7.63568	6.06682	5.99908	20.5422	7.92811	6.05347	12.7259	10.8529	8.74233	22.9329
Gorasp2	8.96861	12.3519	8.92088	10.104	9.87632	22.2386	7.24015	6.59671	6.65906	7.02206	8.5343	9.36834	19.5663	3.8654	7.07351	10.2414	6.96241	9.02978	9.21256	9.00811	10.8973	6.40908	8.10312	10.0596	8.58839	7.47475	7.29598	6.82852	6.67949	11.3059
Cdk16	7.22119	10.6334	5.52011	11.4323	8.13261	6.22112	18.2285	9.59567	8.88182	10.7553	5.30747	9.60215	7.31699	9.46047	10.2965	4.31479	8.00603	10.5063	8.22942	17.0526	6.60371	6.47003	6.37883	5.49416	6.07077	5.9018	4.68442	5.40483	7.82073	8.93515
Cyp2d4	26.0072	7.45143	11.4121	11.1529	12.6934	9.27004	7.98012	7.01088	10.9151	10.891	8.13842	9.90504	19.2504	9.60813	8.37653	10.5985	9.05461	9.31374	6.09862	6.43556	9.10317	8.54231	9.70424	10.3079	8.98266	14.8628	12.0666	10.7447	10.0515	12.803
Sipa1l1	5.21959	5.14663	4.94211	5.65203	15.8902	6.42027	6.20999	5.32427	2.96215	6.44195	6.39842	6.80706	5.93614	6.3439	4.0101	5.95143	5.69516	5.70492	5.45625	5.11996	6.00724	6.10433	8.47261	18.2756	6.70255	5.22149	4.27933	4.46147	5.12912	5.61989
Il11ra1	7.68414	8.19433	5.70381	9.26585	5.29674	6.61468	7.59321	19.7253	6.69603	7.73315	7.02906	6.98773	4.01517	5.94312	7.22243	6.6408	5.55104	6.92335	6.67441	5.76938	6.70785	24.7033	5.33707	7.9401	4.91647	5.79781	4.19314	5.38752	6.92065	5.92686
Igf1	10.6162	7.97504	11.1836	8.35438	7.49513	7.9471	6.3841	6.94102	4.88454	7.03609	7.09811	8.42247	21.3548	8.28978	7.87128	8.46591	9.17388	8.96266	4.08533	6.65762	6.46643	9.40498	5.88618	9.23663	8.82115	8.90904	9.84289	6.32655	21.3261	4.73204
Plekhb1	12.1684	12.8755	11.8826	11.1208	10.2841	9.35539	8.79264	7.21546	6.64981	8.31325	8.29033	7.88577	9.44687	8.8804	9.02538	9.18504	6.50024	9.39634	13.9873	6.89644	6.8546	6.18404	8.91907	6.45047	3.10189	9.31202	13.8464	24.3758	12.0756	13.2374
Ctcf	5.24228	7.7289	4.61502	8.96355	8.47948	5.9461	6.44214	3.46801	6.67292	5.76828	6.17287	5.5955	6.16543	7.64115	6.88205	8.11874	6.46545	4.5691	16.8975	7.04727	6.93981	7.12641	7.73876	7.42057	9.17266	8.92204	20.6856	6.57321	8.19109	8.41566
Tpm3	11.5058	10.9019	13.3612	8.0704	7.77168	6.69529	7.9511	9.20146	7.79123	8.10273	8.00493	9.86253	9.57935	7.99447	7.47239	6.95325	9.33291	11.5389	8.31559	5.72748	10.8452	7.54368	6.73806	20.5054	8.54089	25.0762	12.9156	9.56771	14.0265	8.30232
Eno2 /// LOC100911625	4.95634	4.76623	5.24231	8.42308	9.01384	5.92239	5.71667	16.4219	6.15535	15.4803	5.23382	8.66691	7.66857	7.34584	9.30725	3.68989	7.20095	6.47935	7.85731	7.51234	5.46759	7.16392	6.08632	5.05279	6.88306	9.80601	6.89088	9.78841	8.46671	6.02131
Xab2	10.9248	8.91038	9.46752	19.0722	7.87481	3.73172	5.75536	3.56282	6.0352	6.22207	7.93128	6.04718	7.18961	7.42494	6.07897	5.86216	8.05075	5.64813	8.108	16.9981	6.06878	7.71246	6.75858	5.38382	6.55055	5.36882	4.97316	4.14125	4.28503	8.72263
Ccnb1	10.1169	9.71147	10.7938	10.0766	9.18727	6.85177	7.02251	9.40605	8.14706	6.62908	9.12351	10.0432	9.47234	10.4571	8.2808	6.75487	4.73603	7.81135	6.53732	8.81119	10.4713	10.4599	7.43085	19.2916	5.80001	6.54312	9.41194	6.19673	22.6655	12.1418
Ninj1	11.3742	10.7095	8.18606	9.96204	5.36237	10.0429	8.39606	11.8112	10.4992	7.44778	8.94858	8.48624	8.65199	8.09466	8.56799	9.7653	8.06069	8.25019	7.31286	8.55142	8.80968	20.3384	8.43668	11.0803	9.42442	19.4907	12.7259	10.5457	10.9215	11.7545
Rup2	9.85821	19.3379	9.66018	7.01236	6.73108	13.291	9.09734	11.0627	8.48903	23.017	6.61937	8.30557	6.3132	6.90288	9.16897	6.12997	5.8194	5.56553	9.14989	7.72602	9.0369	11.3929	7.12294	7.89872	8.10387	4.23353	7.26581	5.87651	11.1152	8.91626
LOC100912870 /// Rup2	13.1942	9.42057	13.8988	9.62311	8.54041	7.37336	8.0962	7.48492	7.60177	6.61973	7.86223	6.90802	8.75389	7.92592	4.16433	7.20123	8.33402	8.7355	17.3989	8.13662	6.97295	8.35009	7.80034	8.82744	7.8426	9.36836	7.96826	12.229	23.7033	12.2079
Timm22	5.38298	5.0437	3.81299	5.94517	7.98262	5.46245	6.46632	7.00589	7.27367	9.28165	6.09461	9.4693	7.99468	8.61673	7.35007	11.273	10.8387	5.45711	10.4816	7.20649	5.83682	8.4251	7.10755	22.4272	6.40329	8.00773	9.3042	5.22308	18.712	10.98
Parg	5.07889	7.66177	7.56774	8.16201	5.47955	9.16098	6.24868	7.49989	6.54353	6.10512	18.8823	6.00998	6.81764	5.83238	7.26498	7.73686	5.97346	22.9849	5.32308	4.08926	5.35871	6.20279	5.10614	7.13092	6.57905	5.57681	5.95572	7.77187	5.87846	7.58449
Scd1	25.9028	10.4186	7.54982	12.898	10.8419	6.07413	7.38524	7.1506	20.2313	4.44434	5.96112	7.69447	8.49912	7.91537	8.81264	6.96317	7.87185	7.47061	5.515	6.16741	7.55047	8.15317	7.94916	7.7516	7.26783	9.54168	5.90401	9.16527	9.55197	9.48769
Tpcn1	7.75676	6.22519	7.31235	21.4905	6.5389	5.72798	5.41681	6.26238	7.75889	7.88285	3.57667	6.65827	3.82664	5.82183	6.35021	8.37168	5.23299	7.75456	7.31286	15.1336	9.95527	9.49407	6.99978	8.46883	5.70501	10.6813	8.02859	4.11529	7.76043	5.61044
Ces1d	5.26498	17.2345	8.28464	5.60623	7.02639	6.44872	5.93915	6.14762	6.0352	6.19868	5.39953	8.56595	7.5259	7.03998	6.06301	7.69718	9.72551	6.4019	8.44093	6.30567	5.77055	24.9237	10.5099	7.91251	8.58364	4.81417	7.65797	2.73054	5.33584	7.10278
Arfgap1	4.83379	5.48676	9.06874	6.71923	18.9698	11.4228	11.0126	8.82722	6.87163	7.22322	5.18318	3.01827	7.9692	8.19486	5.85559	7.78645	5.29262	9.24146	10.0821	9.28882	8.47357	7.39365	7.11268	9.02974	17.8988	4.67118	5.09382	8.78014	4.94825	9.70966
Timm10	12.5815	6.24756	6.16979	5.30851	5.1655	6.69529	7.06604	9.68549	6.41876	9.07581	9.20636	8.03987	5.94633	8.8013	7.71704	9.25447	5.10875	9.26727	17.7279	10.1854	6.95401	7.7359	5.89644	7.17689	7.23458	8.15506	7.84759	23.9388	4.90087	10.3
Hyal2	9.73567	5.62102	10.2382	5.90852	16.434	5.90343	7.48197	6.1077	6.64057	6.28289	5.94271	6.48291	5.55398	6.3228	6.75441	9.59668	11.6736	9.30341	8.98147	8.10311	6.54217	5.19009	8.67788	20.0778	3.90943	6.49978	6.29186	6.22269	9.74576	4.78871
Ceacam1 /// Ceacam10	27.2054	7.67967	9.11355	10.9468	8.67166	11.1003	6.55337	9.30625	7.35223	9.45942	7.6689	8.13552	8.04054	8.68528	6.77568	25.1944	6.1623	8.43089	10.4307	8.42572	6.01198	5.03537	8.14417	5.97691	6.90206	12.5403	11.502	14.3234	6.45124	5.7049
Steap3	5.619	23.0972	5.08549	9.03683	9.42633	5.72324	6.66461	5.8083	6.0121	6.13319	4.59398	21.1173	7.48004	8.24759	6.28107	9.18008	9.35776	9.73709	6.3258	6.12551	6.39542	9.40498	6.34291	8.09642	4.97347	8.97837	10.248	11.5713	5.06452	9.23267
Gls2	27.2054	7.35744	9.11355	9.49486	6.78733	6.79013	6.43246	7.88911	7.5648	8.60798	8.01874	8.63503	7.8622	6.0855	7.56813	7.12188	4.05519	9.20015	9.12639	5.54313	6.92561	6.44659	9.09355	8.85043	22.6015	10.3	7.74847	10.9525	5.98613	9.19489
Ybx3	10.2531	6.13568	13.0878	22.6997	8.26386	9.16572	9.15538	9.61064	6.22929	7.40099	8.64938	8.23117	6.34377	8.83294	6.66399	10.4299	8.90055	7.81135	17.5595	5.05711	9.76591	9.99573	8.13904	6.75391	8.16562	6.17479	6.3522	10.6149	10.6415	8.17954
Cyp3a9	9.64943	19.4811	10.3188	10.6995	10.9497	13.291	9.05865	11.1725	10.8735	9.26762	8.00033	8.55	9.05962	8.86458	8.99878	8.67917	22.3483	9.38602	4.79821	8.06959	7.28538	8.64077	7.77981	9.05273	8.52188	8.43672	5.2188	11.753	13.0532	10.9942
Haus1 /// LOC100912125	9.8219	7.18738	14.0557	8.7437	4.66863	7.19317	5.07342	6.57675	6.67292	6.2174	8.16604	7.92828	6.56797	23.0026	8.7435	8.83787	8.22469	8.5961	5.46408	6.84197	8.45464	7.4546	4.1465	8.36308	7.18232	10.4993	11.1659	22.0867	4.88795	13.1335
IgG-2a	6.60845	22.6407	11.4435	10.7269	8.99978	11.7594	9.37785	11.8062	5.81801	8.8419	6.09922	9.53838	8.15773	8.564	7.66918	5.47036	9.21861	8.7355	6.00853	7.35732	7.02975	6.70914	6.2454	9.31479	24.2356	8.76604	5.63682	12.1425	10.0989	11.1831
Cyp4a3	8.11079	10.6602	5.26471	7.61696	6.85764	5.61892	6.41795	6.32725	3.48896	6.05366	7.44334	5.93558	7.94882	6.96616	8.11592	7.02269	7.80724	8.66838	7.21494	8.58913	7.70196	7.01858	20.0397	6.53782	8.86865	7.56575	17.6862	6.51262	7.00248	8.93515
Cyp4b1	13.3168	4.7886	12.7249	4.96499	6.22485	5.06889	5.47968	7.80927	5.7718	3.92505	7.65969	7.2853	8.37683	6.44936	5.99919	9.26439	9.02976	7.51191	4.6572	7.63804	4.93739	6.51223	20.8813	7.20448	8.8829	23.2562	12.9156	9.10036	9.1127	4.8076
RT1-N3	8.8733	9.52798	12.4158	5.83066	7.46232	7.44922	5.35394	7.50987	6.68216	6.22675	9.45493	9.10265	5.44698	6.35444	7.80746	10.9606	9.23352	8.35345	4.92747	7.00956	6.5327	7.02795	7.35901	8.98376	21.8367	21.5143	6.13672	7.57282	6.66226	13.6861
Mcpt1l1	8.4285	8.16748	10.2023	4.81842	7.78575	21.0769	6.7952	3.0788	6.79769	6.99399	3.54905	7.3597	6.80745	7.44604	6.22256	9.10569	6.25673	5.69976	8.29209	7.15202	7.97179	16.2829	5.92723	4.90107	7.46734	6.75978	4.91283	4.69947	5.98182	6.70609
Smim3	12.35	10.2977	11.0985	23.2631	5.75611	7.38758	5.61994	5.92307	6.20156	16.7715	8.12922	7.17903	8.04054	8.44798	7.69577	9.59172	6.39091	5.78236	8.28817	3.81273	10.5091	11.4351	6.91254	9.26881	5.58625	4.19886	12.6958	12.3545	6.59766	13.7475
Tnnt1	6.63569	5.54941	6.85084	7.64902	6.99826	7.61992	22.9924	3.8223	4.93999	5.51566	7.18096	3.82067	6.25715	7.70443	6.57358	6.02582	21.3047	5.64297	7.33245	6.14227	6.16819	5.60267	7.81574	4.88728	5.16823	4.47618	8.26992	5.19712	9.65102	7.57032
Rab38	9.74474	6.09093	12.6712	6.46731	5.15144	10.0382	6.00686	12.1006	9.59348	20.7527	8.72763	8.56595	8.6316	9.58704	7.83405	7.78645	6.27164	7.22279	5.61684	6.69952	7.66409	8.8705	8.97552	8.77687	8.42213	24.8725	14.6652	13.6094	9.3754	13.0485
Mxd3	13.8206	5.80003	13.0923	4.93751	7.66387	7.19317	7.84954	6.98094	6.06293	7.3355	7.55382	8.42247	6.04314	7.40385	8.73818	7.09708	7.14629	5.63264	6.69399	7.01375	7.89131	2.81306	7.6002	13.14	7.21558	9.95334	5.24466	11.6016	14.3882	7.24446
Srd5a1	10.0715	10.7184	11.4121	11.3636	7.71543	5.97455	8.48795	6.96597	7.0842	7.1203	7.99573	9.07076	19.9128	7.76771	7.54153	8.22785	9.03473	10.114	8.10016	6.1716	7.94338	3.91015	8.38537	9.42054	7.01132	14.8628	24.7796	12.5622	9.75007	11.9671
Ripk3	7.52982	10.1053	9.3331	10.2048	10.9497	6.3207	6.85323	7.46496	6.47421	6.34839	7.65509	9.53838	8.26474	9.34446	3.91436	6.92846	5.27772	6.63939	14.1126	5.58503	6.13032	7.15454	7.58994	6.61598	7.43884	9.08237	24.7796	8.85371	11.1755	11.1878
LOC259246	8.41035	5.59416	10.2023	11.2903	10.6404	6.74271	6.48083	7.16058	9.55651	7.73315	8.43763	7.76887	9.2991	7.10854	7.86596	7.59303	6.85805	7.65131	6.24355	7.74697	23.5035	9.59721	6.55844	7.58149	7.54809	12.7266	21.694	12.93	12.2048	11.2681
Pdgfa	6.37244	7.80945	5.60972	7.12229	10.7622	6.74271	8.74428	9.64557	8.56296	3.64436	8.77366	6.59982	7.35775	9.01223	9.66359	8.23281	6.212	5.71525	8.1315	8.67711	9.36827	8.62202	6.08632	19.6319	7.04457	6.26146	5.92125	19.1441	4.99131	6.25272
Acsm2a	8.6509	6.54741	11.5465	12.2934	10.5326	21.4278	9.00545	7.02585	6.37255	7.97642	8.5435	9.02294	7.6431	8.38997	8.84455	9.31895	8.97013	7.84233	6.85067	8.61426	7.2049	9.18932	7.73876	7.21827	8.46963	12.8392	9.14906	12.2636	17.7	12.6282
Nupl1	8.955	6.78013	7.42436	7.19557	9.13571	6.15	7.13375	22.7691	4.53795	6.14722	6.33398	7.09401	7.69405	7.07162	20.2313	5.24718	8.33899	8.58062	5.45233	9.66172	5.24509	7.99377	6.98438	9.15387	6.91631	8.76604	7.06326	9.19124	5.40474	5.03901
Tmsbl1	14.3516	7.30374	5.3588	4.81842	7.03576	8.51137	9.62935	6.28234	16.4697	8.4957	3.58588	6.823	6.6444	8.47435	6.25447	5.8324	6.39588	6.87172	7.24628	5.76938	6.883	5.72926	6.99978	6.56081	3.51041	7.73041	12.4674	8.31712	9.3108	4.84066
Dnase2	7.80669	5.25404	4.69119	5.20316	16.3074	6.62891	17.2129	7.64959	5.99823	6.76475	7.07049	6.2119	6.21129	6.56011	7.50431	5.93655	5.8194	6.77363	3.87774	5.31269	2.91605	5.85116	6.24027	6.5884	5.26324	5.16083	6.89519	5.5433	6.27467	4.39201
Pla1a	10.9248	10.0516	20.203	7.43375	9.63257	9.68257	10.9304	10.938	5.91043	8.39278	7.25461	8.30557	8.42779	7.47768	6.12151	4.14616	8.78128	9.64416	8.64853	6.38528	7.72563	6.05745	8.49313	6.71713	17.1815	11.5566	12.3683	7.86275	5.58992	11.8773
P2ry14	10.9611	5.13768	5.08101	9.24753	9.41696	5.44348	7.00316	6.71148	6.29861	3.41512	8.28112	9.53838	8.16283	9.78742	7.64258	8.48079	7.88179	8.41024	5.20949	6.72885	19.3993	5.27917	6.82017	7.80677	6.95431	10.235	24.7796	14.0378	14.0696	12.3968
Hdgfrp3	4.61593	7.37535	10.2785	6.27952	6.23422	6.76168	16.5987	7.0009	7.11655	6.28757	6.32477	7.69447	8.71313	7.54096	7.13202	2.85173	5.38705	8.04368	6.48248	5.79452	5.35397	6.3997	6.81503	3.60454	19.1861	4.47618	7.9424	4.88555	9.33233	6.90916
Aard	7.97008	5.01237	4.8749	5.62455	5.18425	7.26904	7.17727	7.46995	6.123	20.0978	7.0935	6.03123	6.15015	7.30365	6.53103	6.96317	5.48644	5.6946	5.18598	7.39084	5.70428	7.60932	4.28506	8.88721	8.00886	17.7921	6.77453	6.2876	8.01021	3.62695
Usp15	7.67506	5.25404	24.0967	5.85814	6.55765	4.6611	6.55337	7.67454	20.4485	7.79864	7.03366	6.81237	7.60233	5.96949	8.52013	6.56145	8.73159	8.65806	8.95013	6.335	4.30306	5.51828	7.47704	6.32633	8.63589	8.02507	4.79647	6.9367	4.49175	4.77927
Hmmr	9.55412	6.70405	9.04634	23.1211	9.23415	8.9476	9.35851	6.52685	16.4743	9.17405	6.68842	9.25143	8.35645	10.0353	9.32321	8.78332	9.19376	11.0123	4.23418	5.30012	7.64989	6.66694	6.19409	7.85734	6.86406	12.8176	13.0836	7.50358	12.545	12.5857
Abcb1a	11.8961	10.8303	8.54899	7.47039	6.29516	7.13153	6.57756	4.30633	7.31064	7.23258	19.4669	7.24811	8.58065	7.59369	8.78605	6.83918	7.78736	5.90111	7.35203	7.29866	6.90194	6.8451	7.71823	7.63666	7.72385	12.8392	22.3189	12.4887	11.3349	12.359
Lhx5	8.17433	5.26746	9.34206	5.31309	6.45922	5.90817	20.0422	6.64162	5.6193	6.68522	5.34429	8.37465	7.92334	6.53901	6.66399	6.68544	6.56981	6.88721	4.51619	18.5148	9.60023	10.6755	6.04526	5.85738	8.45063	10.391	12.2217	2.99018	4.4573	8.0048
Np4	4.6477	7.83183	6.58649	9.00935	7.70137	6.34441	7.4723	4.69055	7.90676	6.76007	7.57223	4.74528	8.973	20.8405	8.56267	20.9838	6.92265	7.68745	6.09079	5.79871	6.05458	8.03596	5.7117	8.53779	6.71205	5.89747	9.27404	5.70341	8.1954	7.29641
Prl6a1	5.27859	6.03722	5.30504	3.74664	5.70455	5.27752	5.2959	7.40508	6.71451	5.38467	19.3932	5.70709	6.82783	6.38081	8.40844	6.21924	6.76363	7.19698	6.58824	5.67301	5.3303	6.89199	8.54445	4.37694	8.09436	4.57151	5.93849	6.47368	20.8567	5.30347
Ptpn23	5.46468	7.16053	13.9705	8.0704	4.82332	6.15	5.8666	18.9718	5.88733	6.48873	7.29144	7.09401	6.6393	7.90482	8.69563	3.16914	6.9972	8.85425	4.58278	5.50961	6.59424	7.94688	7.66178	4.57004	6.71205	6.9721	6.18413	5.56061	6.99817	5.13346
Cyp2b3	11.2925	9.69804	10.0231	7.20015	7.87481	11.0387	12.9181	9.19148	23.2073	8.19162	8.35017	6.81237	5.38074	6.79741	6.26511	9.3487	20.5592	8.56513	8.37435	7.83077	10.4523	10.6662	9.95057	11.3929	9.49568	10.7896	13.6697	8.98785	10.086	4.71315
Myo16	4.47523	6.15806	8.32944	8.06582	6.68421	5.62841	5.94398	5.68355	7.44465	7.66765	6.26033	5.83993	6.56287	20.8457	19.9441	6.51682	6.77854	3.25258	6.35714	5.68558	8.84281	7.28582	6.37883	6.65736	6.86406	6.29612	7.02879	9.03978	7.24795	2.5502
Obp3	8.68721	9.51903	12.1917	11.0247	9.27165	8.78639	11.2012	10.7633	22.5696	6.42324	8.3962	7.7423	9.28381	8.59036	8.66372	8.57998	9.09437	8.0695	5.83619	7.88105	6.09245	6.83104	10.1353	8.80905	10.156	11.483	21.694	7.40838	12.2048	11.15
Scnn1b	7.0351	5.50466	6.32213	5.05202	5.68111	5.35339	7.37073	6.00291	17.4402	6.49341	4.85175	5.7496	6.62911	5.96421	6.75441	5.85224	8.85086	4.66203	5.89494	17.7439	5.41078	6.1559	6.2454	7.64585	10.1512	5.29516	6.809	5.08893	5.77941	7.8159
LOC100909451 /// LOC100909493 /// LOC100909534 /// Olr1466 /// Olr1467 /// Olr1468 /// Olr1469 /// Olr1470 /// Olr1481 /// Olr1482	7.05779	7.22766	7.21377	10.7315	8.78416	22.3192	11.6558	8.8372	5.21726	9.17405	4.61699	8.69348	8.98828	5.63199	19.7473	5.07359	5.18329	7.11954	6.03987	5.32945	5.48179	7.99846	6.8099	9.41594	6.52679	5.58981	5.93849	4.561	8.18248	5.59155
Ppp1r32	7.91108	9.15653	4.65535	7.84597	5.91548	7.02247	6.8097	6.01289	17.8283	7.06416	7.83001	3.15112	7.05713	6.19624	6.46721	5.94151	7.07174	5.75139	6.2788	15.54	3.3989	7.72184	5.63472	7.09414	6.08027	4.8965	5.22742	8.94458	4.50898	9.66715
Pcdhb12	6.6493	6.69957	7.33475	7.31008	7.81856	6.02671	6.26802	7.6446	4.26069	5.74957	6.47207	10.2451	7.67876	7.30365	6.74377	6.05558	6.49527	8.63741	6.78408	20.1782	9.24519	8.28914	7.45651	9.14468	7.73335	16.2841	4.87835	7.25692	6.8216	5.79935
Hdc	9.83552	10.1501	6.78364	18.0828	8.74197	3.69379	6.15195	6.62665	5.99361	7.76122	19.6418	7.45535	7.82653	5.44215	8.09465	8.44111	8.94031	9.18467	7.35203	8.42153	9.04163	9.63941	6.09658	9.73317	10.5217	7.86041	7.77864	12.004	6.32635	7.11695
Lilra3 /// Lilrb3l /// LOC100912456 /// LOC683463 /// LOC690948 /// LOC690955	5.51915	9.20576	10.7983	5.90852	10.2279	8.07513	6.81938	7.73941	9.46871	8.56588	8.75065	9.5437	8.17811	9.30227	9.31257	21.4698	7.00217	6.76846	8.57019	5.73167	8.52565	9.02053	8.62656	5.10336	7.40083	7.88207	12.0881	12.0603	12.4934	24.1797
Cyp2c13	5.21959	19.3379	4.76288	5.06576	5.74673	13.291	9.1312	10.7633	23.2258	8.10741	6.43985	6.39258	6.68007	6.2437	7.37134	6.74495	5.84425	7.31572	6.0712	7.71345	7.25698	8.25163	6.35317	7.13092	7.13482	4.82717	6.25739	4.69515	5.40474	4.31173
Cyp2d3	6.61753	19.8884	11.0178	8.90859	10.1482	10.0145	6.71781	9.17651	6.79769	6.86767	7.82081	7.56694	8.88637	9.68196	9.30725	6.6656	5.73492	7.71326	17.7201	5.83223	7.47473	8.98771	8.94986	9.36996	8.66439	10.2697	12.0364	10.3293	6.95941	11.8679
Ube2g1	6.62207	8.28384	6.82844	8.94981	3.38898	5.58099	6.04071	7.25538	9.62583	9.43135	6.03017	7.31187	6.05843	9.40774	7.90851	8.3072	6.18218	5.5552	8.3861	8.32098	6.52323	6.39033	8.7138	3.81603	20.6539	5.12616	7.22272	16.1106	7.15321	4.53841
Adprh	4.09851	7.85421	7.19585	25.2784	11.4185	6.9466	6.5969	7.69949	6.76072	5.34724	5.98414	9.42679	9.06981	7.94701	8.05742	7.27066	9.32297	6.35027	14.4416	6.8294	7.04869	5.47608	10.397	6.08726	8.8069	9.06503	7.0331	9.0268	8.74664	7.86784
Arntl	6.09557	9.53693	22.6853	10.5254	12.9512	7.06515	7.25949	7.445	5.8596	8.54249	8.1062	8.27368	8.5297	7.53568	7.89255	7.92036	6.42072	7.71842	6.42764	6.94672	5.83682	6.58724	7.66178	20.9606	8.04211	5.87147	5.85661	5.72505	8.4624	11.4759
Fgb	8.24241	11.6582	4.44476	9.41241	6.9467	5.26804	6.68879	5.27438	7.34298	20.4814	20.9076	7.95485	4.54509	8.36888	6.20129	5.72825	8.27935	8.7768	6.39631	8.57237	5.67587	6.59662	6.86122	5.82519	6.18003	6.03613	6.45563	6.30491	3.0835	5.64822
Tnrc6b	10.7977	9.47875	4.26554	24.1288	7.30763	6.82806	6.65978	6.69651	6.9964	6.72733	7.83922	7.7051	7.23037	3.77575	8.80732	7.2657	7.82712	8.48252	14.6061	5.9244	7.05816	5.52766	6.69187	5.83898	7.20132	12.6919	12.5923	8.33875	13.3504	10.9706
Slc15a3	10.0171	10.5439	11.8826	10.1224	6.0936	6.2875	7.62223	8.00388	7.39844	7.39164	7.79319	8.58189	7.56667	6.5812	7.99892	7.61783	7.41464	7.39317	7.75547	17.3333	11.6547	10.127	5.78867	7.9401	8.23687	9.31202	24.4392	14.1677	10.9215	12.2646
LOC257650	5.30583	5.4062	4.46268	5.91768	5.30612	5.33442	5.94398	7.27534	6.33558	6.63376	5.77699	6.59982	5.38584	6.57065	6.60017	10.787	5.38208	25.1378	6.32189	5.29593	8.27002	9.32997	7.22045	6.3953	2.98788	13.3202	5.00763	5.46974	5.68467	6.1441
Gcgr	10.6979	9.64881	13.6748	8.62003	5.35299	6.98928	6.21966	18.378	8.09623	8.18694	7.31446	8.26306	6.35906	6.42827	8.05742	4.51813	7.37986	8.19857	5.36224	5.65625	8.84281	10.0004	6.84582	9.83432	8.10862	7.99907	9.50244	24.2373	9.5735	8.4865
Ube2d2	8.56466	10.0963	11.9543	7.17267	9.26227	6.25431	3.92235	7.1007	6.6914	6.0864	19.384	7.83795	9.04433	8.75384	5.85559	7.39465	8.18493	8.85941	7.44212	6.05848	6.08772	8.3876	8.35971	7.46195	6.46504	7.89074	6.96846	9.58935	23.7033	6.98472
Acvr1c	5.04258	5.70157	5.314	15.6003	5.65767	9.40281	3.00343	8.19349	6.40489	6.6478	7.70573	6.29693	6.04314	6.23843	7.9936	4.80578	5.27772	5.47259	3.58397	10.2609	6.89247	15.6547	6.62003	9.14008	5.28699	5.85847	4.46895	4.47013	6.22299	5.75212
Xrcc6	9.88999	7.711	13.6748	6.5864	7.9873	7.86649	7.57386	6.92106	7.33836	6.38113	6.68842	4.81967	7.44947	7.18237	6.36084	10.2563	8.84092	8.46187	6.78408	7.46206	7.04869	6.98107	7.17426	8.31711	18.3121	13.8402	23.435	14.0508	10.3487	8.65652
Ogt	27.4913	6.0954	8.54003	7.12229	5.84048	5.82756	7.61255	7.2005	7.50472	7.39632	17.4046	7.551	7.1998	8.4849	8.802	9.03129	7.31028	6.08697	9.569	7.15621	5.74215	7.09359	9.00631	5.68267	8.23212	4.8705	7.55455	6.5083	9.01795	10.078
Eml2	4.85649	7.85421	5.6142	5.36347	5.80298	7.18843	17.2419	6.26238	5.20802	5.82442	8.92097	9.34708	9.31948	8.15794	7.92978	7.28554	5.71504	3.7637	7.05043	7.94389	5.01787	5.53234	6.87662	6.62978	8.67389	7.95574	10.6832	23.3416	7.33839	9.85133
Pzp	6.90801	5.80898	8.23983	4.83216	5.44674	8.33592	8.34286	11.1725	12.9392	23.017	5.95652	6.89739	6.83293	7.27729	7.02565	7.39465	18.9938	7.00595	4.79821	5.64787	6.17293	6.88261	6.1479	6.79069	8.46963	5.0265	4.80078	4.46147	5.06022	2.97996
Sema6c	11.4422	7.38877	10.5429	6.43983	7.12482	5.6616	7.03702	7.97394	5.83649	16.9259	5.29366	4.54867	6.01257	5.64781	7.47239	6.59617	8.82104	9.43764	8.25292	19.2061	5.14095	6.72789	4.98811	8.41825	6.04227	10.3477	11.1616	5.86785	4.6554	6.95638
Stx2	7.50259	6.33259	19.2845	5.65661	5.22175	7.73373	5.72151	4.47598	7.31064	7.25129	17.2113	6.88677	6.90936	7.82045	6.28638	7.474	8.93534	9.85583	5.59334	5.23727	6.08772	5.09163	6.27619	2.91489	5.94252	5.9408	5.10675	8.63734	6.4297	8.62346
Akr1c14	12.7857	11.5508	13.3388	9.29333	7.63575	18.1228	6.26802	7.1506	6.06755	6.06301	8.56652	8.69348	9.28891	4.47711	7.5894	8.95194	8.59244	6.81493	7.52829	7.95646	5.61433	5.88398	9.64779	7.14471	8.04211	13.8402	9.4852	13.8734	23.1822	13.2374
LOC100365958 /// Rdh16	12.704	5.7687	13.0878	6.77419	10.1482	6.98928	8.79748	7.53981	7.08882	6.41856	7.31906	7.86983	7.93863	7.20346	6.54699	6.72016	7.85197	7.43447	8.69553	6.88806	9.19785	7.56243	26.0336	7.89412	6.53629	13.7449	22.2844	12.1425	12.0369	9.16183
Adra2b	5.56454	6.27889	6.93598	5.9131	6.33734	5.04518	6.2245	5.28436	5.97975	7.33082	20.6269	3.85255	5.68137	8.38997	23.0235	6.85406	6.8829	6.77363	5.29566	5.14091	6.70785	6.01525	5.83486	5.11256	6.39379	4.62351	5.06797	6.30058	5.10328	4.63287
Slco3a1	4.48431	23.9564	7.58566	6.92534	9.71226	7.26904	6.6501	5.8582	7.10731	7.41503	5.22921	9.007	7.73481	7.75189	7.74895	5.75801	5.3622	10.5322	7.45779	16.3361	5.77528	8.69703	7.32308	6.68955	5.17298	5.94514	7.61488	7.88438	4.73292	6.55496
Sardh	7.46174	10.1545	7.89483	7.12229	10.1341	7.21214	6.66461	6.91607	8.04078	7.67701	8.29033	8.50749	9.06471	7.97338	7.90851	8.06419	7.76252	8.1934	16.592	5.02778	6.55637	8.85175	7.11268	7.01598	4.5412	8.76171	12.1829	9.27346	12.0541	19.6791
Cyp2c6v1	5.13335	7.63939	5.47978	7.03984	9.86694	8.65362	5.41681	6.79631	6.47883	20.4814	5.6389	6.16408	6.02786	8.57454	8.35525	5.6489	4.95469	10.0314	6.17304	5.89507	7.19544	8.72985	7.83113	7.747	6.12778	4.60618	5.81351	5.27068	5.93014	15.0604
Abcb1a /// Abcb1b	11.2607	10.7274	5.9592	10.0491	12.7262	8.32644	7.98012	6.23245	6.5805	6.19868	5.94731	8.71473	7.69915	4.89371	8.24889	7.81125	9.12419	9.62867	7.81423	15.3389	7.7493	7.4124	7.75929	8.16079	8.13237	8.54938	12.2864	10.775	9.09116	23.4382
Adora1	8.26964	7.77365	5.0362	5.13446	3.80616	6.50562	7.48197	7.42005	5.64703	6.20804	6.76207	7.72636	8.58575	9.50266	6.60549	6.12005	4.91493	6.24186	7.03868	6.90063	15.4607	5.57923	5.51669	7.03897	18.9296	6.52145	7.02879	6.44771	11.0291	7.4617
Rfc1	7.81123	10.8706	7.2765	11.2812	8.48885	8.87174	9.5568	5.31928	9.14985	17.6651	6.87715	23.8964	9.10038	6.96088	8.44567	7.41945	5.43177	5.56553	7.3677	5.69396	7.01555	6.8076	5.36787	4.85969	6.09452	6.08813	6.41253	5.43945	9.54335	5.81351
Cyp3a2	11.2562	8.67767	9.52129	4.87339	9.61851	8.62043	6.23901	6.67655	6.47883	8.85125	7.68731	8.18335	8.92714	9.69778	9.06261	7.8906	4.95469	8.60643	6.61174	7.46206	8.27949	5.58861	8.84723	7.34241	7.17757	4.54552	5.15847	10.6322	14.7285	14.8431
Ptprc	8.48297	8.86116	12.7249	5.46882	9.14977	6.27328	6.92094	5.52387	8.03153	8.52845	8.50208	8.61908	8.37683	7.34057	8.14252	10.8812	9.34782	7.05242	8.53102	17.8821	5.51492	8.75798	7.3744	8.11941	4.3322	12.6399	11.1659	5.89382	9.84912	23.0699
P2ry1	4.53423	12.9248	5.86959	13.0262	11.2263	6.1737	16.1344	7.67454	4.67197	6.6899	8.16604	5.41483	6.08391	7.70443	6.54699	7.9154	6.70399	9.33439	6.98384	9.59049	6.09719	9.61128	18.7003	9.8849	7.99461	9.31636	9.59725	7.5382	9.28065	9.18073
Slc16a7	5.96849	7.87658	5.66348	5.20774	7.38732	11.7594	9.88568	13.1136	23.4338	8.10741	6.89557	8.33745	5.37055	7.81517	9.31257	6.82927	6.84811	6.79944	14.9469	6.60734	5.68534	4.72125	7.53349	5.29647	9.07291	7.49208	4.54221	7.65504	6.70963	6.87138
Optn	10.2259	5.03922	7.85898	6.2154	6.07954	5.76118	7.34655	5.56379	9.52416	7.62555	19.4254	6.89208	6.84312	4.89371	6.65867	6.0903	5.68025	5.84432	7.36378	6.4607	6.24393	7.84374	26.1876	5.83898	5.45325	10.0487	6.77022	8.99218	5.88277	6.12993
Ccl22	6.12734	3.18644	5.892	5.09324	5.50768	6.71426	6.23417	9.06175	22.9208	16.4721	6.37541	6.24379	6.04824	8.17376	6.46189	7.05244	8.7465	7.58419	5.90669	7.47044	6.13979	5.64955	7.44111	6.97	6.6598	6.06647	7.56317	7.30452	5.44781	6.03075
Cd247	4.36176	7.75127	4.89282	6.31159	7.07326	5.31071	17.6675	5.958	5.7949	4.86538	4.75969	6.24379	5.58965	5.94839	8.46162	4.89505	5.23299	6.52581	13.6661	8.44667	5.22143	6.35751	5.94263	5.71025	7.57184	6.77278	4.73183	5.93276	3.07489	5.44515
Fgl2	10.766	8.44047	22.2328	10.0766	11.7747	9.85327	8.54599	7.23043	7.53707	8.01852	8.56192	9.18767	9.06471	8.22123	8.50949	7.78645	20.599	6.79944	8.68378	8.1869	6.87827	9.8457	9.04737	8.65733	9.46718	13.9095	9.4852	12.8998	12.0282	7.70728
Rhov	3.0319	5.48228	4.63295	17.0065	6.7264	7.34016	6.82905	5.69353	5.74869	8.83254	5.73096	6.67421	7.54119	6.50737	3.49421	8.9321	9.68078	9.9023	14.1126	7.01794	8.40257	9.84101	6.01447	6.46426	6.27978	5.64181	6.48148	4.41387	9.5778	5.10985
Gzmb /// Gzmbl2	5.70524	4.81546	5.44393	3.87031	6.5764	5.21114	7.21113	7.35518	5.63316	6.98931	6.53191	7.90171	6.84821	6.44936	7.16393	4.14616	8.52783	8.90587	5.93803	5.04873	24.1473	8.69234	7.89784	7.14011	6.76431	21.9519	6.92105	5.54763	5.9	5.78046
Fgfr2	21.9177	9.10282	7.63495	7.68108	9.30446	7.39232	6.56305	5.7584	8.05464	16.7481	8.17525	7.22154	7.16413	8.14212	5.77582	6.29364	8.79122	8.28117	4.17151	6.61153	9.00376	7.66089	5.81433	5.83898	5.44375	6.48678	5.75318	4.18885	6.87328	4.67537
Defb22	5.18328	5.0616	4.49405	17.5332	6.05141	5.66634	7.9366	6.39711	8.99735	10.5261	8.2489	21.7656	3.31201	7.11381	5.78645	7.70214	7.36992	6.51032	5.38575	3.41051	6.48063	8.27976	7.56428	6.97	5.46275	6.75111	4.91283	7.63773	5.45642	5.22319
Trpv5	4.57962	20.4209	7.14656	4.72224	5.31549	3.08685	7.20629	6.18754	6.27088	5.96009	5.68493	6.6317	7.02655	6.87124	6.61081	5.97623	8.72165	7.31572	12.7769	5.45933	10.0357	9.98635	6.57897	6.17001	5.03048	4.50652	10.9289	10.7707	8.96197	4.94928
Hyou1	9.74021	8.07797	6.87325	4.95583	6.89983	6.92289	20.6129	4.10673	9.34394	7.34018	8.35017	6.97179	7.36285	7.69916	7.25966	7.76166	7.16616	8.38959	17.3676	6.55287	8.76707	6.6857	7.45138	6.66196	5.41049	4.50218	4.55945	11.7227	7.99299	12.7841
Zfp37	11.4967	12.9695	7.76489	12.2797	12.9512	6.56727	8.10103	7.94899	21.1417	4.57065	8.49287	9.49587	8.88637	10.3464	9.17961	10.8068	9.89944	8.7355	5.65993	8.42153	9.87952	8.71579	6.33778	9.8757	7.6621	13.6755	10.0325	10.7404	5.48226	22.4229
RGD1564614	10.1078	22.3409	5.29159	10.7224	7.89824	8.93338	7.51099	9.29627	7.18124	9.25826	7.99573	8.30557	8.64179	8.89622	8.30739	7.30538	9.88454	9.93328	5.91845	9.43547	23.5035	11.3929	9.54002	9.36996	8.9019	9.57635	11.2564	6.56022	11.0291	11.9246
Maoa	8.2878	8.11378	5.3364	7.91009	8.51229	6.63365	7.23531	22.4847	6.13225	6.72733	6.73445	5.93558	6.00747	5.64253	7.80214	10.534	8.99498	6.64972	17.5595	5.05711	6.20133	5.04944	6.3583	6.17461	5.70501	5.45115	6.82193	4.40522	4.1989	8.92098
Huwe1	7.52528	4.66777	6.95838	5.21233	5.82642	24.6521	9.18923	7.61466	5.54998	7.19983	6.96922	7.10995	5.17183	6.21206	6.70122	6.30356	6.05794	23.8471	6.74883	6.81264	6.34808	6.43721	7.37953	8.11481	5.67176	4.79251	7.40802	5.50436	9.54335	5.07679
Gclc	27.4913	8.80745	9.83045	5.22149	8.69979	6.51511	8.58951	6.33224	6.15997	23.2462	8.17525	8.66691	8.17811	9.00696	8.36057	8.21297	7.32022	8.03336	6.63524	6.5403	5.54806	8.24694	7.29229	8.15619	5.73351	10.4777	7.16238	12.4367	6.96372	13.6861
Hspa9 /// LOC100912578	8.24241	10.6334	6.84636	10.6674	12.0653	7.87124	8.1494	9.59567	9.50105	9.58574	4.9254	9.13984	9.21757	8.00502	8.64777	7.3153	7.98615	6.86139	15.7068	7.79306	7.82504	8.13911	3.59226	7.67804	5.80001	11.132	11.5839	7.66802	9.90941	22.4276
Ugt2b1	9.79921	11.063	11.4121	6.65968	11.7747	12.1814	24.9367	6.94601	9.53802	7.9156	7.40652	8.75724	8.27493	8.42689	8.47226	9.04617	7.13138	7.65647	6.37281	7.9397	7.73983	8.57513	7.23071	6.59759	9.60493	14.8628	10.2221	12.9906	24.7585	11.7309
Cyp2j3	11.6283	7.45143	12.6712	9.90708	24.9791	6.93238	6.73716	6.47196	6.87625	9.03838	5.73556	8.9326	8.92204	8.82767	8.46694	8.21297	10.1728	6.59809	16.733	6.15065	7.88658	7.57181	5.86565	8.04585	5.64325	4.50218	6.09794	4.48744	5.15927	9.70966
Fev	5.29221	4.88259	4.51197	6.61846	4.91707	7.03669	7.3659	5.68854	6.03058	16.8557	4.30397	5.61675	3.34258	7.10854	7.37666	5.24718	5.91382	5.82367	6.24355	6.39366	16.8619	7.35614	9.01658	5.96312	8.62164	5.99713	5.1757	6.30924	7.64416	5.26097
Asmt	11.2879	11.6448	9.93798	5.16652	8.54041	4.31495	7.38524	6.16758	6.59898	5.88056	6.75287	9.79876	5.5336	8.90149	7.07883	6.70528	10.8387	8.98332	7.03868	6.77912	6.49483	18.0317	6.75345	7.63206	7.34383	8.22873	20.7588	6.11451	4.68124	9.10044
St6gal1	6.99879	8.21671	10.1262	7.61238	7.07795	9.16572	9.87601	11.6465	12.9392	11.3962	8.72763	10.0326	9.79335	10.5362	6.56294	10.4299	11.0126	9.42732	17.5595	5.73167	8.03333	5.36825	8.67788	7.79298	7.77135	5.33416	10.2566	8.05315	7.26518	24.293
Ttll5	7.40728	9.11177	8.36081	5.61997	7.86074	7.28801	16.1972	7.22544	8.1563	7.12498	8.5435	5.97278	6.73612	6.85014	6.13215	6.0903	4.09495	9.26727	7.92782	8.24975	4.73384	6.82635	6.88175	17.5445	7.60034	4.73184	10.4764	9.64561	9.10408	5.05318
V1ra14 /// Vom1r103 /// Vom1r105	5.92764	7.54541	17.0711	6.71923	5.89204	5.21588	4.13515	5.46399	7.31988	6.12851	8.51589	7.27468	7.03165	7.0558	6.05237	7.09708	5.5411	6.73749	5.04106	7.72602	5.86523	6.94356	5.49103	7.1631	6.6788	3.75688	4.7663	4.35762	20.5854	6.08743
Il13ra1 /// LOC100360218	8.8733	11.2913	13.9616	12.1697	10.5326	10.0382	9.00545	7.85418	11.2663	9.67462	8.19366	7.79012	7.71953	7.97865	7.6745	12.0467	8.25948	26.7228	8.17458	8.53047	6.42382	8.83769	5.89131	9.21824	7.89486	10.1397	7.95533	6.53859	8.13941	24.293
Prkacb	6.10011	5.46438	21.6234	6.06883	6.84358	6.16422	7.26433	6.86118	7.36609	7.46181	5.80001	8.4703	7.7501	7.89427	8.50949	7.72198	6.52509	25.8761	8.31951	6.02077	7.55521	6.12777	7.77468	7.12632	6.50779	10.6683	9.70499	4.69947	9.16868	4.62814
LOC257642	11.2289	7.52303	8.0382	8.06582	5.22643	9.30323	9.63902	10.8581	5.92892	6.66183	5.88747	9.41085	9.29401	7.3933	5.05783	9.46773	9.60127	8.15726	8.35868	9.72457	8.51618	6.62475	8.31352	8.96537	18.6636	21.9519	8.41214	6.02364	7.69153	9.76633
LOC100910648 /// Olr1079 /// Olr1081 /// Olr1082 /// Olr1083	4.97449	6.34602	14.6202	7.62154	5.42799	3.7744	6.57272	5.59373	3.52593	8.40682	7.06128	7.31719	6.5323	20.2815	8.61054	6.51682	8.29923	7.33121	7.26978	7.08079	6.03565	6.01525	6.66621	5.76542	7.7951	5.98413	5.75318	4.71246	6.23591	9.36018
Kcnk6 /// LOC100909725	6.26351	9.50113	6.19668	24.0097	6.30922	5.43874	6.04071	9.32621	9.71825	9.30036	6.09001	21.3724	6.91445	5.57398	6.23852	7.93524	8.14518	6.05083	3.88165	5.89926	5.33977	5.52297	6.50713	4.86429	5.28224	4.33319	4.11126	4.65187	6.54598	4.5148
Mup5	8.29234	10.517	21.6234	5.66119	10.8794	22.2434	7.58837	6.94601	9.01584	7.92028	8.01414	8.25243	3.81136	7.60951	8.05742	6.96813	7.35998	7.75456	6.42373	6.04172	8.16587	7.58119	8.27247	9.37456	8.05636	11.4873	12.2864	14.3494	13.3504	6.50301
Mapre1	26.4157	6.68167	8.75958	5.22149	5.14206	7.61518	8.39122	6.94601	8.99735	7.73315	7.51239	7.46598	8.99847	9.01223	6.40339	25.1944	9.3677	6.722	5.40533	5.88669	5.91257	5.21822	6.55844	5.55393	5.77151	6.85077	8.67071	9.44222	5.77941	10.8572
Foxe3	5.34214	5.24061	2.60771	5.94975	6.69358	6.30647	6.73232	5.47896	5.75793	5.41274	7.8162	6.65827	7.32718	6.04859	7.89787	7.5484	5.20814	7.31056	15.5697	16.6587	5.17409	4.84783	5.65525	7.51712	3.79542	4.30286	9.30851	10.7837	5.05591	9.60104
Retsat	12.9854	9.84573	10.4622	9.80632	6.97014	7.48242	6.39861	6.13265	7.09344	6.02559	7.6689	8.34276	8.1934	7.66752	9.80187	7.107	7.52398	7.01628	8.88746	6.54449	8.74814	7.65151	5.4859	8.18377	24.2356	9.31202	12.7044	24.259	9.12992	11.7498
Ccnd2	10.362	8.41362	8.34737	5.61081	8.68572	6.35863	6.20515	6.04782	7.5879	4.61743	6.77588	8.64034	7.51571	8.02611	6.07897	7.82613	8.14518	5.80302	5.36616	6.66181	6.17766	5.39638	6.79964	6.04128	16.3645	23.4512	13.2172	5.47839	10.7707	6.53135
Mpst	4.70671	10.3246	4.4582	6.89786	8.55916	7.39232	7.78183	8.86215	9.80605	9.45475	6.78969	8.75193	6.38453	9.49739	8.36589	8.97178	5.77965	7.50675	17.7279	5.94116	6.13506	6.55442	6.11198	9.84811	6.22753	8.19839	12.6958	12.9906	23.1822	7.98119
Nr1d1	8.31503	9.78755	11.2329	5.74363	4.87488	6.57201	7.2208	6.37216	6.76072	18.2171	7.77477	8.55	4.89668	7.79408	6.08428	7.13676	8.55765	7.12986	8.19808	6.13389	8.47357	8.22819	7.19479	6.33553	7.63834	10.235	24.4392	14.1677	12.2048	12.1796
Sec11c	5.57361	12.6652	5.03172	5.09782	5.31549	5.38658	6.45664	24.825	8.79402	5.76828	4.87477	8.20992	6.22658	8.33197	6.98842	6.21428	6.29648	5.27124	3.4743	6.56544	8.09013	7.35145	7.95429	7.64585	8.54564	11.3313	7.99412	5.8116	5.08175	10.248
Fbxo6	21.0644	6.84726	10.7983	9.21088	7.2842	23.8318	9.61484	8.48291	10.8088	6.30628	7.5216	7.42878	8.58575	8.84349	8.81264	7.74678	7.9613	8.74066	5.04889	6.15903	8.71973	8.97834	9.99675	6.55162	8.9684	6.54312	9.78687	12.0603	11.0894	8.05675
Bambi	4.80202	7.21871	4.98243	6.78793	5.18425	5.8892	6.58723	6.20251	6.8208	7.0548	6.43064	5.89307	7.13356	7.04526	17.2743	8.37168	4.76088	7.53256	5.24082	5.12834	24.971	10.0707	6.87148	5.27348	5.76676	10.2957	11.8296	8.43828	5.77941	10.1489
Slc38a3	7.00786	8.59264	10.7266	22.9379	11.6763	6.74271	7.19178	7.06078	7.19973	5.21625	8.58033	10.5586	9.52839	8.47962	8.04147	10.663	10.1976	7.29507	10.4816	5.50123	10.7221	23.9438	6.28646	9.50329	7.39133	8.35006	7.33045	8.91429	8.49255	8.43928
Cyb5r4	8.65998	8.75375	8.7551	7.33756	8.97634	9.46445	8.25096	6.17257	4.50561	9.99742	8.35477	9.13984	9.94112	5.4316	8.67968	9.84962	10.0684	6.3193	15.3621	5.18699	6.68418	10.1645	8.10825	5.44819	7.17757	5.79781	5.82644	16.2015	6.6235	6.04492
Zdhhc2	5.11066	9.34449	5.04516	7.11313	7.13889	7.38758	6.49534	7.12565	6.34482	4.42563	7.03366	6.31287	19.3982	7.57787	7.9936	7.965	9.14903	8.75099	7.31286	6.28054	7.28065	5.01193	8.31865	6.31254	6.88781	11.301	12.7044	10.3293	19.5303	6.70609
Egfr	4.92911	9.03569	4.70912	5.05202	23.7744	5.67108	5.76987	4.05683	5.75331	5.09929	6.83572	5.69646	5.06483	20.8246	6.14811	7.16651	9.23352	5.52422	4.89222	7.13107	9.29726	8.11567	5.49103	4.81371	4.17069	6.51712	4.85249	4.89853	6.17992	4.88316
Mgll	8.31503	18.5681	5.7531	8.43224	4.6077	7.55354	5.71667	6.97595	7.10269	5.47355	18.7764	7.68384	7.80615	7.6517	8.4563	4.26023	8.17002	5.13701	6.54515	8.13662	5.67587	5.89804	8.03127	5.98151	8.58839	11.483	8.11909	6.50397	9.34525	10.1016
Tox4	11.3515	8.64186	11.2105	8.75286	18.7777	7.07937	6.92578	8.17852	6.94095	7.5507	8.13842	7.16309	5.84952	5.81656	7.71172	8.22289	8.84589	4.5691	16.8975	6.94253	7.54574	7.24362	6.06066	6.61598	3.49616	9.04337	12.4932	11.7141	8.60452	8.70374
Serpina4	10.5935	10.8751	9.60194	6.02761	10.931	8.82906	5.95849	6.59671	6.76534	20.182	5.66191	7.2056	9.00357	9.07024	8.71691	8.25761	6.59466	6.64456	6.65482	7.71764	3.48411	6.36688	8.44182	6.36771	8.25587	10.092	11.3038	24.0599	8.78109	8.32594
Sycn	5.52822	5.1153	4.74944	6.75129	5.99985	5.72798	5.86176	8.0438	5.0509	7.56473	7.42953	7.88577	6.98579	5.96949	6.77036	5.40092	6.16727	20.2951	4.81388	6.10875	18.9543	7.2905	7.69257	6.13783	5.99002	8.57105	5.3567	2.89498	8.67773	7.3578
Sptan1	8.39219	9.57721	9.0329	7.66734	7.64044	6.61468	8.67173	8.70247	6.40951	8.47699	19.4254	9.38428	8.93223	10.4888	8.29675	8.44111	6.33127	8.1108	4.5867	6.24283	5.56226	5.88398	6.00421	5.33325	6.21803	5.61148	22.5904	5.62985	7.72167	9.02488
Asic3	5.41022	6.75775	4.61054	4.99247	5.99048	6.16896	6.04071	7.13563	7.26442	6.12851	7.99112	7.59351	6.94503	6.84487	6.55762	5.18766	4.92984	20.6306	3.66231	18.5148	5.34451	4.07424	6.66621	6.21139	5.17773	6.8941	6.28325	7.89737	6.78284	5.7049
Hnrnpf	13.8206	8.54788	26.6775	4.85507	7.69669	7.23585	7.1676	4.89514	6.52966	8.44424	8.06017	7.84326	21.2529	8.30033	6.71718	9.22472	8.71668	7.15568	6.43939	6.43137	8.67239	8.64546	6.48147	6.62058	7.46259	14.0049	14.3075	8.50752	11.6234	9.19017
Spon2	5.27405	6.22071	4.60606	7.43833	8.36698	9.50238	6.37926	6.9011	7.45389	6.19868	5.36271	8.28431	6.60873	4.65641	6.48317	9.49253	6.74872	8.53415	9.14598	7.33637	5.99778	8.85175	5.91697	19.1537	5.92827	6.98077	6.24015	5.73803	8.76386	22.744
LOC171573	5.87771	8.46285	5.90992	7.26428	5.88267	6.86125	6.20031	6.79132	6.00748	16.2943	5.58826	8.6244	7.91315	8.41107	8.03615	10.3406	8.88068	7.82168	5.18207	12.6574	8.94222	5.39638	6.53792	7.09873	7.32008	2.50458	4.95161	4.66053	3.78547	5.81824
Cst3	11.061	7.39325	9.4496	7.72688	7.2842	6.02197	8.23645	6.06279	20.1759	7.29339	7.6735	7.58288	8.66218	10.7735	8.78073	8.79324	8.82104	8.75099	17.7279	6.34338	7.28065	8.89395	8.47261	11.232	8.48388	8.05973	8.38197	8.23057	3.39357	7.13112
Acta2 /// Actc1	10.9974	5.23614	9.56161	7.70856	5.26862	9.18943	8.68141	6.99092	15.4623	9.2068	8.25811	5.60081	5.80875	7.85736	6.84482	8.7734	6.14243	6.24702	15.5384	5.04454	5.24036	6.94825	7.3898	4.86429	6.65505	5.61581	5.82644	9.10902	5.67605	3.11219
Apoe	5.65531	7.18291	5.05412	7.59406	4.82801	6.10258	5.79889	6.49691	10.9521	23.017	5.97033	6.65296	4.2088	21.9584	6.0896	5.24718	8.24954	7.21763	5.94978	7.08498	6.00724	5.56047	6.10171	5.25968	5.34874	9.76268	9.89891	5.51301	9.72423	5.36959
Col1a1	10.9248	22.408	8.33392	6.88412	9.60914	11.2141	8.8265	10.8581	5.39287	8.96821	8.3916	8.75193	8.45836	8.33197	8.09997	9.26935	9.59133	4.47101	6.96034	7.37408	7.75876	6.67163	18.3103	7.3654	7.46734	14.0049	10.9375	6.76361	10.7793	12.1182
Rpl41	11.1109	8.49418	10.9461	8.06582	8.1748	9.29849	10.0259	11.0827	16.0169	6.75072	18.4173	7.94954	9.16662	6.88706	9.55722	10.3456	11.445	10.5683	6.55298	5.54732	10.1778	10.4599	7.32308	9.50329	8.82115	9.90567	6.7142	6.88045	4.76737	9.00127
Prl3b1	5.38752	4.85573	5.03172	5.08408	5.81704	7.28326	5.70216	5.45401	7.93449	3.22799	6.16366	7.01961	5.89538	6.0064	8.14784	10.6183	8.95522	7.388	12.538	6.12551	5.6238	5.61205	6.80477	7.02057	17.1768	6.8811	2.4952	4.39223	7.15751	6.04492
Urod	9.20009	7.00389	12.2186	6.58182	5.17019	22.0964	5.19433	6.48194	5.71172	6.11915	7.47096	6.75392	7.99977	6.48628	6.04706	6.01094	5.39699	7.40349	5.02147	6.5026	22.6041	7.84843	7.15886	5.75623	7.24883	4.8965	6.42115	7.52089	4.7243	11.0273
Dlst	4.83833	5.89849	5.92336	6.52686	6.85764	10.2326	7.8979	7.43502	6.73299	15.7376	6.93699	9.1239	6.08391	8.34251	6.96183	5.31661	2.45498	6.02502	15.3621	8.03188	7.47473	10.6193	8.49827	10.1378	8.18937	6.23546	7.47267	7.98391	5.90861	6.72498
Rnh1	6.19089	4.93182	5.36776	6.2612	8.86853	6.51037	6.40828	6.452	6.79307	6.23611	8.29954	10.0007	8.25964	8.10521	8.17443	8.26257	9.21364	9.82486	4.85696	7.6548	6.84513	9.93478	5.44997	20.8364	8.27012	5.0135	8.86463	6.62513	12.2048	24.3969
Tst	13.2124	9.92628	13.3208	8.99561	7.28888	9.59248	8.77814	9.70046	7.93449	9.29101	8.48366	7.69447	4.93744	8.43216	7.69577	8.18322	8.2396	7.64614	17.0268	7.54167	7.88658	10.3427	8.21602	8.63894	7.72385	24.8725	13.2172	10.5673	9.1127	6.22438
Ctsz	12.999	9.51903	10.1979	9.82464	11.5028	11.6788	11.5543	9.59567	6.70065	8.87464	7.86223	8.13552	7.98449	9.88235	8.00424	11.4565	7.08665	7.31056	17.7945	5.8825	7.14336	9.63472	8.28273	9.4941	8.8544	13.7449	10.2221	12.9906	24.7585	11.7451
Tgfb1i1	6.88986	22.1395	6.20564	6.23372	5.72798	7.7195	7.86405	6.0079	5.67938	3.69114	8.75525	7.20028	8.99847	9.49739	6.5789	9.29911	22.3533	8.27085	8.69553	5.60179	7.23331	9.48938	7.06649	7.99987	8.27487	7.70874	9.15337	5.56494	5.71481	7.32947
Cox5a /// LOC100361008	5.78693	8.96856	2.9348	10.7865	7.09201	8.34541	10.4902	6.33723	22.5696	8.60798	9.41811	10.4258	8.98828	9.32864	7.80214	8.28737	6.41575	20.9559	6.4864	8.82375	6.73152	5.36825	7.32308	5.65508	8.70714	10.352	9.79548	9.33837	7.05846	6.38967
Cyp4v3	4.39807	8.56131	20.4226	5.50088	7.91699	7.03195	7.39975	5.78335	6.88087	5.72618	8.13842	7.80075	7.82144	8.20013	7.23838	5.49515	21.1953	7.54289	4.23809	5.63949	5.11728	7.7781	8.11338	6.09185	6.7168	11.5826	10.7608	7.81947	12.7991	8.07092
Actr3 /// Actr3b /// LOC100910079	8.55559	5.37935	25.9875	16.8599	5.54986	6.72374	7.54484	6.14762	6.89473	4.76246	7.02445	8.21523	7.16922	7.14018	7.74363	6.83423	7.48422	7.77521	5.83227	7.31542	6.8404	5.51828	7.5027	6.95161	7.39133	12.7006	13.6094	10.8702	8.04036	13.2374
Cd48	10.9294	9.61749	6.41175	11.3636	9.12634	7.08411	8.21227	6.88114	9.13136	7.34953	7.90366	7.81138	9.08	6.3439	4.88764	20.2745	8.67195	10.2534	7.99832	7.21487	8.9943	9.04398	9.78122	8.10102	8.11337	21.8393	8.05876	12.1641	5.3143	11.8962
Acaca	25.3717	9.80545	11.3135	4.61231	9.87163	6.3207	5.99718	6.42206	6.89011	8.90271	21.0872	8.79976	5.24826	8.76439	8.38716	6.68048	6.376	7.5274	4.71987	7.00956	7.21911	7.50617	7.3744	10.1562	9.78544	4.9355	5.0809	6.32655	7.32116	6.88554
Cldn7	4.85195	8.90591	5.67245	5.27645	5.48424	5.59522	8.35737	7.8442	7.03799	5.6794	7.06588	9.38428	7.44947	10.1249	6.86078	4.6322	5.26778	8.76648	6.12996	6.31405	7.21911	19.7664	7.63612	5.66887	6.08502	8.47572	9.7136	19.2999	3.88883	6.79109
Col5a2	8.56012	12.6518	12.8504	10.53	10.4904	10.299	12.9181	8.13861	11.5251	10.367	7.79319	7.72636	9.12076	9.62922	8.06274	9.62644	9.31303	8.21922	6.44331	9.81255	7.87238	23.9438	6.86635	9.6918	7.51484	19.5773	7.533	10.048	10.3831	6.93749
Bckdha	6.96702	6.4758	7.06143	7.54825	6.13579	13.291	11.5543	8.48291	22.9208	8.97756	9.72192	7.9336	8.32588	5.47379	6.46721	6.67056	8.69183	6.29348	15.7068	6.89644	8.1422	7.93751	5.49103	10.4228	7.48159	5.0395	7.02448	6.35251	7.24365	8.99654
Dock9	12.999	5.98352	12.1783	7.83681	9.37008	8.53982	8.59919	7.33023	9.1175	8.58459	7.58604	7.76887	9.49273	9.4552	9.06261	12.2004	9.29812	8.83876	8.35476	8.61426	7.68776	9.8832	4.98811	19.7146	8.06111	24.8725	8.98099	6.07556	13.2169	9.24212
Hdac2	5.26951	12.8532	7.83658	12.0277	12.9512	7.35439	7.01767	7.47993	6.98716	6.17529	18.5278	6.45103	15.862	4.33473	8.22229	7.02269	7.85197	9.78872	6.67049	5.86155	6.35281	6.24967	8.3751	7.61367	8.99216	12.3279	11.4633	11.4458	3.81131	8.43928
Nup62	8.41942	20.4209	9.88421	8.48262	7.37794	6.95134	6.15195	7.16058	6.94095	7.41035	6.23271	7.43409	5.13616	8.02084	7.06288	2.99555	7.71779	3.91858	9.25565	8.78186	7.26644	17.0518	5.9375	9.84811	6.90681	7.9254	7.92085	5.0197	6.84313	6.29994
Rfc2	11.2471	5.37935	6.17427	7.98338	9.72164	8.3217	11.4092	9.15156	5.50839	22.2825	8.12922	9.15047	8.37683	10.5521	9.47744	10.2166	8.06566	8.9575	6.37672	7.45368	8.34103	5.04475	6.63542	4.78613	9.34842	9.22103	14.3075	24.259	9.73284	8.85959
Rsad2	7.86569	10.6781	25.871	10.0216	12.8762	7.25007	6.25835	7.27534	3.7616	7.40567	7.40192	7.96017	7.55138	7.98392	9.08388	6.66064	5.79952	7.35186	8.38218	14.1364	6.69838	7.6562	7.70284	8.34009	6.25128	9.32502	12.5837	6.40444	11.0291	8.92571
Hsf1	4.85649	5.08398	5.81134	10.8186	7.74356	8.39757	7.39491	22.1703	8.11471	5.88524	5.98414	8.42247	5.43679	9.4552	8.92433	8.59982	3.6626	7.31056	8.22942	6.92577	5.5954	6.32	8.26733	4.8321	22.6015	7.75208	5.0378	4.92449	7.95854	5.60572
Atp5c1	4.58416	5.7687	8.21295	6.05509	6.4639	3.65586	7.39975	7.69949	6.95019	9.03838	6.52271	7.95485	7.54628	5.89038	8.15847	7.29546	7.75755	5.65329	5.64035	7.22324	5.36817	15.0264	6.98438	7.81596	7.59559	6.07513	9.84289	7.76322	6.7527	23.5421
Srpk2	6.05926	8.92381	6.83292	7.10855	8.98103	6.94186	6.9548	5.4091	6.92708	7.29339	7.54461	7.31719	6.21639	8.23177	6.76504	24.014	5.48147	8.98848	8.20592	8.20785	8.55405	7.26237	10.0891	8.55158	9.52418	19.638	5.78765	5.94574	6.93357	8.01897
Scamp3	5.90494	5.07055	5.71277	7.20015	6.82483	10.0429	11.709	13.1136	23.4338	7.97642	6.88636	7.36501	8.70803	5.71109	6.898	5.87704	7.09659	7.72875	3.33329	7.64642	6.44749	18.5896	6.09658	6.98379	6.6693	7.68274	5.05935	7.42136	6.2316	8.06619
Atp9a	8.18341	9.89943	6.75227	6.00013	7.51856	5.34391	7.3804	6.27236	7.62025	3.5274	7.00604	6.92928	7.83672	6.47573	6.75973	5.49019	6.10267	6.75298	5.58159	13.8809	6.84513	23.6766	6.63029	6.76311	6.26078	5.66348	7.59333	4.91584	4.3927	6.51718
Myo1e	6.86716	10.2351	20.8841	6.48563	7.67325	9.11356	9.01512	9.67551	6.12763	7.45713	5.26604	7.85389	22.6134	9.31809	7.83937	5.95143	7.51404	8.08498	7.74372	7.68831	6.04985	5.48546	9.16027	7.69183	9.16791	10.1613	11.6787	12.1901	13.3504	5.3932
Nup153	5.34667	8.0556	6.15187	16.64	6.45922	6.33966	5.68765	6.8512	6.08604	5.65601	7.03826	24.4013	7.83163	5.62671	3.48357	9.59668	9.62115	11.033	6.80367	5.38391	5.33977	5.28855	8.20062	5.56313	5.90927	4.79684	5.82213	4.3706	6.07657	6.68247
Dmgdh	8.75075	12.6473	18.4959	10.0078	6.50609	9.82482	6.62592	11.2923	11.1185	10.8348	8.57112	7.72104	8.95771	9.23899	7.6479	5.77289	8.90552	5.69976	19.0675	5.60179	7.69249	7.54368	6.21974	9.77915	6.97806	8.1204	8.66209	9.18258	5.34445	7.62227
Pdxp	7.42997	7.33059	5.35432	5.26271	6.82952	5.79437	8.84585	7.09072	8.8541	20.1726	7.70112	5.68052	8.20869	8.02084	6.46189	6.88382	5.62062	5.46227	4.31643	6.02915	5.61433	5.92617	5.61419	8.35389	5.88077	2.97257	5.79627	5.79861	7.35131	20.5575
Pdgfra	11.4967	7.63492	4.32378	5.35431	5.16081	6.34915	6.67912	7.16058	5.85498	6.35774	7.07049	7.5138	6.13486	7.97338	8.36057	7.32522	6.10267	8.26052	7.46954	5.58503	21.7189	5.92617	7.83113	7.98608	5.09698	11.5696	12.2864	12.8998	22.2606	6.39912
Rasa3	6.08196	4.84678	4.09079	6.05967	10.5607	7.03195	8.63304	6.36717	8.60455	6.56359	8.3962	6.92928	5.95142	6.62339	5.15888	6.61105	6.50521	7.32605	5.59334	5.60598	7.31852	8.67359	9.09355	19.4296	10.5787	6.92444	17.2854	4.66918	5.07314	5.80407
Marcks	13.2986	10.2977	8.42802	9.95288	8.35292	7.13627	7.99947	9.04179	8.90031	8.88868	18.4173	9.44805	10.0991	9.90344	7.8766	7.83605	9.23352	5.85464	5.75785	8.82794	9.47715	8.42979	7.72336	10.363	8.15137	11.6909	22.1637	10.8399	6.59766	12.5196
Ppap2b	7.67053	6.18938	4.98243	16.2141	5.1655	5.69953	5.76987	5.87816	6.428	7.05948	3.6135	8.26837	5.92595	7.91537	9.11047	5.66874	4.99942	6.05083	6.94859	6.06267	22.5236	5.12914	5.87078	5.4298	5.76201	8.51038	4.34397	8.42963	5.03007	6.25272
Gstm2	7.36643	5.94772	7.12416	4.58025	22.7432	9.16098	7.71896	6.34222	8.91417	6.85832	5.31667	7.74761	8.44307	6.18042	8.79668	7.16651	8.6471	6.722	8.10016	7.50396	8.07593	9.8035	7.41545	7.82056	7.62409	5.40782	3.66307	19.5595	4.50467	4.93983
Dcn	7.85662	5.76423	10.619	8.3269	5.38112	6.30647	6.16162	6.00291	5.94278	6.49341	8.57573	6.94522	8.40231	4.74606	6.90332	8.16338	21.9159	6.55163	5.27607	9.52345	8.7434	8.31727	6.79964	8.24814	7.39608	7.99473	10.6746	6.79823	7.54941	24.5764
Il6st	6.90801	17.4046	5.87407	7.36962	5.84986	5.34391	5.92947	6.10271	7.77737	7.30743	18.293	4.1023	7.84691	8.63782	8.20634	5.87208	5.85419	6.07665	7.6928	8.76091	6.09245	3.21626	7.25124	8.34469	7.28683	6.91144	6.7185	4.87257	7.26087	5.46877
Col3a1	9.84914	10.2351	12.4606	23.2631	9.12634	10.8917	11.5688	9.93	12.9392	8.6033	9.46874	9.62872	7.8622	10.0089	8.802	11.7194	9.54163	9.73709	9.569	7.61709	7.53154	24.7033	10.3662	10.3676	9.79969	11.7559	10.8556	11.6016	6.43401	12.5857
Ass1	5.81417	7.54988	4.46716	7.93299	5.40924	10.9581	7.74797	11.2623	8.48903	23.017	8.19827	6.75923	7.85201	8.57982	5.63222	5.41084	5.89395	6.82009	7.21886	5.71491	6.57057	8.19068	6.27619	7.31482	6.98757	4.38519	4.72752	5.29664	5.74065	21.1856
LOC680329	5.1152	25.6078	4.09527	9.03683	12.8481	5.45771	7.54968	7.15559	7.18587	7.46649	7.63207	7.3969	7.20999	8.57454	7.89787	5.67866	6.77854	7.81135	5.77352	6.79588	4.36933	5.43858	7.54375	6.42288	19.8416	12.3799	13.0836	8.12671	11.5459	11.1831
Kcnj14	5.36937	4.14416	8.94329	6.10547	5.15612	3.7175	7.24982	21.5366	5.67938	7.64426	7.87604	16.4305	9.24305	8.11048	6.19065	9.39334	8.15511	5.85981	8.26467	7.70507	5.42025	6.36688	8.6009	5.01141	8.52188	6.50845	5.34808	10.9135	12.1402	7.24446
Myh1 /// Myh2 /// Myh8	5.43745	5.23614	7.70664	6.17418	7.78575	4.41453	22.3734	4.62069	7.1489	5.99284	7.32366	6.53605	6.50682	7.31947	6.14811	6.72016	20.3505	6.13344	5.51109	6.61991	6.58004	5.9543	6.27106	6.31714	6.94481	4.65385	10.0067	5.60388	7.16613	4.71315
Vps54	8.4285	5.87611	9.27485	6.25662	5.71861	7.39232	3.72406	6.60669	6.63133	6.96124	7.35128	6.41915	6.15524	6.58647	8.02551	6.92846	7.85197	6.72716	5.69126	7.44949	23.3189	6.61068	6.99465	5.28727	6.19428	6.15313	4.97747	6.66841	14.526	5.54905
Scamp1	4.8111	4.94524	19.7012	4.75888	7.2467	6.60046	7.06604	6.73643	6.7561	8.34132	6.11302	6.1322	19.7141	7.01889	7.733	10.6531	7.52398	5.7772	4.7042	5.16604	6.69365	5.71988	7.33335	8.1286	7.03032	11.4136	10.2781	6.56455	7.00248	5.4546
Rxrg	12.9854	11.6448	12.595	6.08257	8.88259	8.8907	6.03587	7.89909	6.91322	7.35889	8.5435	8.00268	4.94763	8.8804	7.98296	20.4382	6.06788	7.31056	6.52557	6.77912	8.19428	5.51359	8.19036	8.03205	7.23458	8.88737	5.91694	23.757	12.7474	11.0036
Lamc1	12.704	9.73832	12.483	7.0261	13.1856	7.56777	5.79405	5.92307	6.98716	5.96945	7.20398	6.68484	7.13356	8.51126	8.02551	22.0302	7.19598	7.43447	5.87144	7.42017	7.01082	6.15122	5.37813	8.75848	6.83556	6.08813	4.49911	6.52128	6.30912	23.9152
Spag5	10.3711	9.4161	8.86712	7.28718	8.95759	6.65736	10.7756	8.0438	8.6369	9.33311	5.0635	8.42247	7.98958	8.80657	7.70109	5.75801	7.64822	7.95591	4.90397	6.98024	18.514	7.92813	6.97925	7.20448	6.82131	6.55178	8.13633	7.23529	22.3597	8.69902
Map1b	5.9821	5.65234	5.81134	5.9131	4.97331	7.46345	6.96931	6.09772	6.0999	5.61858	7.10271	6.98241	6.12467	7.0769	6.97778	6.00103	6.63939	7.15568	6.74491	7.61709	3.27108	3.45068	7.69257	5.9953	8.23687	4.97017	4.67149	16.3962	4.87073	20.6897
Hacl1	8.29234	11.7209	9.84389	12.9575	8.13261	8.33592	17.5901	8.33321	15.4207	7.88285	7.26382	5.91433	7.36285	7.11381	6.99374	9.26439	6.79344	6.19023	6.80367	5.43	10.2156	10.5443	8.60603	4.36315	10.878	5.98413	5.52046	4.35762	6.41248	5.66239
Mx1	10.1895	6.60111	10.2203	9.29791	7.10139	7.64838	6.78069	9.62062	9.42712	10.077	8.5435	9.53307	8.90166	10.2198	8.88178	8.7238	8.49305	8.26052	7.8534	18.8039	9.09844	9.17056	9.38094	8.97457	5.41524	13.0732	10.6746	23.2897	8.71649	12.6046
LOC290071	12.2365	9.64881	12.3217	6.77877	8.91541	7.08885	17.9722	6.63663	6.2755	5.81974	7.94049	7.78481	7.02655	7.82572	4.46216	6.57633	8.54771	6.66521	7.6458	6.16741	8.56352	9.36748	5.74249	8.31251	6.95906	7.98173	10.8772	24.3758	8.90167	5.92213
Trib1	5.99572	5.29879	6.11154	8.22155	3.73116	5.7754	6.78069	6.64661	5.24499	18.9563	15.8902	5.68583	6.49154	6.53901	6.86609	5.55467	7.42458	5.53971	7.66147	5.88669	7.00135	3.93828	9.42712	5.32865	8.01836	4.73618	4.86973	4.52638	5.82678	5.78046
Rimbp2	5.2559	4.90496	5.70381	6.78793	5.11394	3.28126	8.40573	7.1007	6.62209	7.20451	15.3148	6.38195	8.50931	7.01362	6.35552	5.31661	5.49638	6.21604	7.79464	6.14646	4.05217	6.44659	8.45208	19.9169	6.70255	5.38182	4.55514	5.58225	5.93445	6.86665
Arsb	11.3469	13.3007	11.784	9.03683	27.0462	11.2141	9.10218	10.8581	6.0352	8.05127	7.54461	10.2611	9.28381	10.5626	8.24889	8.5651	9.85472	5.20929	17.5752	6.51517	9.3872	9.92071	6.12737	8.03665	6.20378	3.8782	9.29558	9.08305	10.6932	11.8443
Masp2	5.3966	4.76175	7.08384	5.54668	5.0905	23.8318	9.59549	13.1136	8.48903	11.4196	5.59747	7.75824	7.96411	6.25425	6.79164	5.55963	6.75369	7.00079	4.30468	15.7998	7.09603	7.4968	9.03197	5.74703	6.96381	4.54552	6.8995	10.5933	4.44868	4.29756
Cblb	6.60391	6.05065	7.06143	4.87339	6.86702	6.73323	5.8134	8.49289	15.7303	6.68522	6.8035	8.19929	8.8558	6.27007	8.47758	4.94465	7.48919	6.77879	8.60153	7.64642	7.12916	7.0889	7.13834	21.31	6.46504	6.71644	5.05504	5.50868	5.65883	7.53254
Tgoln2	5.40114	4.94972	4.83009	5.83982	6.33734	6.29699	6.70814	7.9939	5.48991	6.83025	5.56064	5.94621	7.6431	5.64253	8.36057	5.73321	5.5262	18.2403	7.44996	3.13817	7.66409	6.16528	21.2816	7.28724	7.00182	5.99713	5.92987	4.61725	6.26175	3.69779
Mat1a	27.4913	5.36592	6.90013	6.38487	5.4233	22.9119	10.8868	9.12662	12.9392	8.19162	5.60667	6.15345	6.11957	9.01223	7.88723	6.0159	6.63939	8.44122	5.46017	5.24146	5.99778	6.68101	7.03057	5.6091	5.06373	4.35052	4.18883	4.323	4.87503	9.9269
Pros1	8.65544	19.3737	13.8585	6.5635	9.46852	9.40281	9.94855	5.88315	6.35406	8.63605	5.07731	8.40122	8.60613	7.83099	7.14797	8.88747	8.58747	7.49642	5.11548	6.01239	23.5035	10.6193	6.25054	8.7217	6.6503	4.08186	10.6746	10.6322	9.30649	11.8632
Sptbn1	4.77933	8.56578	6.27733	17.6019	9.57633	6.33492	7.83987	7.54979	5.48067	6.43727	7.93128	7.68384	7.14375	6.95034	20.9014	3.07986	5.05905	6.61874	7.54788	4.00128	8.71027	7.07953	5.97342	6.48265	6.37479	8.22439	5.73163	6.5559	5.25401	5.3507
Rab12	8.92323	2.52409	11.0178	6.5635	7.21388	6.46295	7.05153	5.64862	7.04261	6.15658	6.33398	7.04087	6.62911	7.93119	6.60017	3.33776	5.4765	5.90111	6.0242	6.54449	18.4099	18.6834	9.12948	5.65968	8.24637	10.1223	4.39569	4.21481	7.95423	4.97762
Prkar2a	9.47242	7.31269	13.0654	5.80776	8.93884	7.6057	6.88709	5.82826	6.68678	7.02206	6.75287	10.1495	8.06601	7.68861	7.38198	8.75852	11.3555	25.8761	7.00735	5.53894	5.49125	6.18404	25.7155	5.88496	5.22999	4.51952	7.92085	5.51301	5.67605	10.6164
Trim23	9.97168	6.72195	24.0967	5.37263	6.22485	9.54032	6.2777	6.45699	7.40768	7.89221	5.81842	9.5437	5.69156	8.29505	8.31803	5.16287	6.50521	4.63622	17.4694	6.76236	5.62854	7.84374	8.34944	5.37462	8.01361	9.21669	8.1234	4.47013	4.84489	5.6435
Aldh5a1	5.19689	6.14911	5.9144	4.87339	4.91707	5.69953	5.33459	5.93804	7.75889	4.94959	6.44906	6.18534	19.174	5.48433	6.61081	6.14485	5.5262	18.3074	6.5804	4.13954	8.1138	7.89062	6.76885	6.22978	5.70501	4.9225	5.5377	4.53071	8.02744	5.67656
Pcm1	21.9177	4.82888	6.85084	7.91925	6.1311	3.61318	5.7602	5.86818	5.17567	5.95074	6.01175	6.07906	5.50813	6.67612	7.38198	6.61105	6.92265	6.33479	5.99287	5.01521	7.2049	6.90605	20.1167	5.01141	7.31058	7.36642	4.80078	6.21404	8.16094	7.4192
Slc22a23	9.9853	6.59664	8.79991	19.8233	5.4608	6.19741	6.6501	6.66657	6.65906	3.67711	8.72303	7.97079	7.70934	8.15794	6.51508	9.77026	8.23463	9.85067	5.26041	16.7844	5.35397	8.61733	6.18895	8.92859	5.51975	8.9957	5.22311	10.1822	10.9731	12.2646
Gnb4	27.4913	10.2351	9.09115	12.0277	8.17011	7.47293	6.58723	6.41208	4.54258	6.16126	7.78858	7.05681	8.05073	6.08023	7.32348	7.75174	5.99334	19.2677	6.34931	6.57801	7.29958	8.75798	7.15373	7.07115	6.94956	9.31636	10.903	6.78092	11.6363	13.0674
Mcm6	12.2592	11.0183	9.11355	9.98495	5.84986	7.10782	8.38155	5.96299	6.79769	8.85125	5.23382	4.12887	8.51951	7.18764	8.97219	9.47269	7.76252	8.94201	5.27216	6.71209	16.8004	7.51086	6.3583	6.48265	6.25128	11.2793	4.57668	24.2373	7.8035	6.54552
Cyp2b1 /// Cyp2b2 /// LOC100909962	7.92016	9.39372	6.9315	7.53451	4.54676	9.19417	7.81085	6.53683	23.2073	11.4196	7.42033	9.38428	6.22658	9.27063	8.23825	5.40588	7.28046	7.64098	7.28545	6.44394	6.76466	9.07211	7.68231	8.47342	5.18248	14.8628	9.4852	9.44222	24.7585	12.5857
Fcgr2b	9.54504	12.6473	7.93963	8.76202	9.72164	9.14201	11.3898	6.3522	11.2155	10.0348	8.20287	9.40554	4.93744	8.622	9.04665	20.7705	6.92762	7.67712	7.05043	6.20931	6.20606	5.62142	8.955	7.52172	9.25342	24.8725	8.99823	7.73293	11.421	6.24327
LOC299282	5.82325	9.72937	6.81052	10.4155	11.5638	7.2074	9.15054	6.86617	4.7875	20.4814	7.25461	6.77517	5.51322	7.78353	7.05756	7.84101	20.5592	7.24344	6.22788	5.76938	6.13032	7.76872	7.6002	6.14243	8.57889	9.82334	6.29617	8.17432	7.29532	5.21375
Capn9	4.96088	5.43753	5.19302	5.19858	5.26393	5.44348	7.03218	6.91607	5.79028	5.91799	6.00255	5.68052	7.23547	6.14351	2.71772	5.36621	4.90003	7.20214	3.04344	5.29174	6.62738	6.47003	7.05623	5.96312	6.61705	15.4738	4.4948	4.58696	7.05846	18.7723
Gsta3	8.47843	12.8755	9.84837	13.2415	12.8762	3.51361	6.82905	6.93603	7.07958	5.94606	8.95779	8.41716	9.17172	9.2179	8.66904	9.48757	7.35998	9.05043	8.17458	5.35459	6.92561	6.92012	7.57454	6.3815	19.2716	12.7266	24.4392	14.1677	9.75007	11.882
Scamp2	8.55559	23.0972	6.88221	7.12687	7.692	6.34441	6.69847	8.94698	7.7404	7.24661	6.84033	7.21622	6.26734	7.42494	7.83405	7.03261	9.32794	11.9261	9.87844	7.09336	6.31494	7.29519	7.36414	19.1261	7.22508	5.17816	7.81312	5.76832	4.47883	10.9706
Pigr	10.1351	7.92581	9.71395	6.93908	7.01233	6.74745	6.8484	7.14561	19.931	6.16126	6.43064	7.21622	5.69156	6.01167	7.27561	5.63402	5.30753	6.06116	8.12758	9.44804	9.48188	10.1364	6.64568	6.76771	6.24178	5.36449	6.50734	4.38791	4.17737	21.672
LOC100134871 /// LOC689064	11.6374	10.4812	7.77833	10.0078	8.12792	7.24533	6.58239	9.49088	6.67292	6.34371	7.3743	9.59683	7.42399	9.38137	7.4458	10.172	9.85472	7.06274	5.68343	17.0526	5.54806	5.71988	7.164	7.3516	6.68355	12.6832	11.4633	11.4501	18.9963	6.75331
Rab6a	4.77479	7.34402	5.20646	7.89177	8.2123	9.10882	5.71183	9.24138	6.67754	8.24776	8.2489	6.7486	6.82783	7.53041	7.63195	7.83109	8.42844	4.63622	16.4745	6.81683	7.56941	5.6308	7.56941	8.26193	16.07	7.34042	8.42937	7.94497	4.75014	9.34602
Itgb7	5.11974	5.86716	5.11685	6.00929	5.52643	9.9813	5.12662	8.30327	8.98811	5.57648	4.97604	7.24279	6.2011	2.91619	6.40871	16.6293	7.42955	7.99205	6.39631	5.59341	6.16346	16.3485	6.86122	4.76314	5.07798	2.25326	5.30499	7.43434	6.25313	5.88435
Tfrc	24.2734	8.90591	10.7266	6.31159	7.66387	6.63839	6.85323	7.25538	6.12763	7.19983	7.20398	9.49056	8.4125	7.29311	8.96687	12.1806	11.9668	11.6731	9.89411	6.03753	8.00019	7.59525	8.07746	23.0387	7.54334	11.7559	10.2781	8.0921	7.23934	12.7841
LOC100910195 /// Masp1	9.36349	9.73832	21.8922	9.99411	8.57323	5.51935	6.68879	8.73241	9.11288	3.39173	7.68271	9.72968	7.94373	8.23705	8.8605	8.45103	18.5664	6.70651	5.33874	7.55005	6.5327	6.27312	5.30115	4.75854	6.7168	4.61051	5.67561	5.43512	9.25481	6.72498
LOC360231	7.06233	5.26299	5.51562	19.8645	6.93733	6.82806	5.58125	5.79832	7.02413	5.79635	6.0716	6.52011	6.12467	5.95894	6.07365	7.93524	11.5344	8.84392	5.93803	8.9285	7.63568	8.25632	20.2501	6.10565	7.26783	6.19213	4.14143	6.4607	5.52963	4.60925
Bmp1	5.20597	11.1749	6.04882	8.15743	27.0462	6.47717	6.73716	7.6446	6.52504	8.43489	5.77239	4.34674	7.59214	6.4019	7.15329	8.89243	8.72165	6.78912	6.91726	16.9059	8.50671	7.30926	6.40962	9.36536	4.86422	7.11076	5.8523	5.81592	5.44781	6.4369
Cpg1	5.9004	6.91886	5.02276	6.36655	5.36237	20.6027	5.96333	4.25643	7.13965	4.61743	5.75858	7.19497	7.42399	6.5021	6.04706	7.57319	5.7548	7.82684	5.61293	5.71072	5.42498	5.84647	6.67134	6.74012	16.1507	4.95717	5.11106	4.16721	5.0473	4.87372
Acox2	5.2559	5.45543	4.59262	7.15435	6.11235	5.24907	5.69249	6.04782	5.42983	7.20451	18.5278	7.18966	6.67497	4.50875	6.16938	6.38291	6.56981	6.23669	5.69126	5.46771	9.21205	9.69567	5.79381	5.50796	6.11353	4.36352	21.6552	4.09365	5.26693	4.85011
Treh	5.64169	5.84478	9.79012	5.05202	6.04673	7.34965	5.54256	9.07173	8.57683	7.52731	8.59414	8.81038	6.29282	9.89289	8.19038	21.321	5.37711	20.7133	3.96391	8.50114	5.73741	4.88065	4.74692	9.78375	7.02557	7.8994	4.74476	11.1515	7.52357	7.30586
Tfec	7.81577	7.90344	9.52129	7.22764	5.56393	6.95134	6.24868	6.80629	6.23853	6.50745	4.82874	8.29494	22.435	7.5515	8.5999	9.05113	7.45937	7.67712	4.3556	3.24711	9.45821	9.83163	5.9221	7.84355	6.10878	17.7921	11.2392	9.23884	7.20058	9.9694
Serpina3m	10.1033	19.1947	8.06061	10.6491	11.1044	3.97355	6.66461	6.97595	7.2598	6.26418	8.28112	7.00898	8.56536	7.30893	7.62663	7.08716	7.53391	8.69936	5.79702	5.25822	15.4134	6.62006	7.70284	6.15622	6.40804	11.158	11.3038	7.14008	7.69583	11.8018
Adam18	5.41022	18.2415	2.93032	4.57567	5.84517	4.52359	6.59207	17.9987	6.25702	6.29225	7.34668	6.52011	6.38453	5.63726	6.95119	5.24222	6.84314	8.09531	7.97874	8.22042	6.18713	6.33875	6.31725	7.85734	7.52434	7.76508	6.14534	4.38358	4.40992	5.32709
Cpa3	8.83245	6.57874	5.13029	5.76654	6.81546	7.08885	3.37583	6.65659	6.72375	6.99866	5.36731	5.31386	6.32848	6.53901	19.274	5.58443	6.93756	5.76688	6.0007	7.92294	7.63095	7.34677	7.79008	21.3744	6.6218	4.52818	5.02056	7.73293	5.61146	7.4192
Glra2 /// LOC100910572	14.5241	5.1153	7.94411	7.61696	5.07175	5.53357	6.21966	7.62963	6.61284	8.06998	3.84366	8.00799	5.99728	8.62728	7.43517	20.835	8.57256	7.89396	4.15975	6.63248	8.88542	10.1176	10.8281	8.55158	8.79265	6.9981	6.01606	10.6366	10.7664	8.37316
Glra1	5.7597	6.20728	2.96616	5.5421	8.18886	5.82756	6.33573	6.43204	5.96126	6.39049	6.25572	7.822	6.99089	5.8271	6.92991	10.8713	7.67306	8.17275	13.1021	7.35313	7.57888	5.65424	6.20435	6.40449	17.2385	5.86281	7.72262	2.42763	6.48138	7.11223
Epha8	8.32865	9.13863	8.06509	6.89786	5.86392	2.86399	6.99349	6.64162	6.15535	5.61858	6.74366	7.7051	5.56417	7.20873	8.29143	6.9235	6.212	6.16441	4.67287	4.4454	6.32441	6.46534	5.88105	7.31482	5.90927	4.46319	4.51635	12.7007	5.32722	19.8538
Ppp1r3b	8.54651	8.7985	5.54699	7.52993	9.58101	8.76742	6.23417	8.34818	5.95202	8.41617	9.57462	9.78813	8.67237	8.24232	7.31284	10.9655	8.25948	11.6473	17.8298	9.40614	5.95044	6.1981	18.7003	7.9309	7.00657	7.24076	8.99392	8.2349	4.5908	4.57147
Mcpt10 /// RGD1565970	7.08049	8.97304	18.021	9.38035	12.8762	5.73747	8.34769	6.13764	6.80231	6.85832	7.88525	8.35339	9.04943	9.23372	6.07365	8.75852	8.16008	11.5854	16.592	5.82385	6.78833	7.15454	6.79451	6.593	6.6883	6.63845	7.88207	4.69082	5.92153	9.176
Atp2b3	5.79147	4.24709	7.72904	5.82608	7.92168	20.2329	6.03587	5.62367	5.90581	4.40223	7.70112	8.50218	9.06471	5.89038	6.7225	8.73372	6.01322	7.59452	6.09862	7.70088	6.13032	5.41513	23.3754	7.08034	5.11598	7.82574	5.32654	4.55667	11.266	7.11223
Cacna1b /// LOC100911781	4.62047	14.4643	4.7584	5.73905	5.92485	5.48141	8.57984	5.99792	9.41325	8.4536	6.27414	6.02592	6.45077	6.52847	6.64272	5.84232	7.12641	6.60325	8.56627	6.07104	6.57057	2.88807	6.09145	6.93322	6.91631	5.75881	4.95592	3.62197	6.13255	21.3178
Nfic	3.32692	9.09835	2.65252	11.4873	9.72164	20.9915	7.13375	7.21047	6.73762	7.9156	5.3489	7.34907	7.13356	7.45131	6.56294	8.64445	8.77631	9.07625	6.92509	7.02632	7.7493	7.33739	7.04083	17.3606	7.09682	7.1151	5.59804	5.46108	5.55978	6.96111
Cask	5.34667	8.21223	19.2532	8.64293	5.15144	5.81808	5.76987	6.91607	7.31526	17.7306	7.26382	5.72303	7.44438	4.94117	8.16379	6.17461	6.16727	8.63224	7.91215	3.17588	7.66882	9.4378	8.06206	7.28264	7.31533	5.0265	6.43839	5.49137	6.36941	7.2728
Grm1	9.33172	7.75127	11.0805	15.7057	5.63424	5.98878	5.52321	5.42906	6.58512	5.73086	3.09334	6.20659	5.29412	7.80463	22.1991	6.61105	5.35226	9.32406	10.1957	7.05984	7.01555	5.62611	7.22045	8.87342	6.53629	4.27252	7.70107	4.2754	6.58905	10.0166
Nfib	13.2214	9.44295	11.2822	7.82307	6.22016	8.79113	9.27629	7.50987	11.3911	10.3389	8.70922	11.3398	8.8558	10.589	9.90824	11.1639	9.3677	8.37927	19.0675	8.41734	7.4984	5.29323	10.2585	7.39758	9.9422	7.86041	11.5107	23.757	13.3504	10.7108
Drp2	9.30448	3.19091	8.68789	5.27187	7.83731	7.26904	9.38269	5.60371	6.74686	5.81039	20.1481	7.92828	7.71953	5.96421	6.64272	7.03757	6.68908	17.6259	5.35441	10.9145	9.16471	6.60599	7.50783	6.49185	7.89011	6.86811	6.12379	4.9894	6.41678	5.2468
LOC100362769 /// Mt1a /// Ttr	10.2349	10.0068	8.20847	5.32683	5.97173	5.76118	5.82307	6.75639	5.75331	6.68522	6.39382	8.65628	18.7969	7.21928	7.30752	8.27249	8.05075	6.66004	7.00343	5.52218	9.60023	10.0707	5.60906	6.96081	6.75005	6.71211	24.4392	9.27778	4.41854	4.79343
Aprt	4.76571	9.99341	5.24679	8.23071	7.23732	8.73897	5.30074	9.03181	10.7719	10.6664	8.71382	6.07374	7.4189	7.4724	7.29157	5.45052	8.90552	6.35027	17.7279	6.03334	7.00135	5.96368	7.8106	10.3079	7.33908	9.52002	10.2221	23.1815	12.2909	4.46758
Nutf2 /// RGD1565456	6.96702	9.78307	8.86712	7.58489	8.40448	6.44872	7.05636	7.97394	6.35406	5.74489	6.15906	10.1229	7.00617	9.12298	9.30193	5.68858	7.36992	5.73074	17.3676	8.54304	7.63568	8.05003	6.8099	9.95386	6.44604	9.57635	3.78805	8.90563	10.8353	19.9719
Tnnt3	9.7629	6.52503	12.1066	5.30393	5.77954	4.22486	21.8752	6.80629	6.13687	5.81974	7.6689	7.8592	5.93104	4.52457	7.88191	6.17957	20.3505	7.23312	6.47465	5.77776	5.78475	6.08089	6.22488	5.039	5.89977	4.65385	4.92144	8.04017	5.89569	5.84657
Xbp1	11.3832	23.0972	14.0557	6.83831	5.71392	6.26854	6.1326	6.70649	17.7128	6.82557	7.26382	6.55199	5.18202	8.05248	8.12656	6.80447	7.76749	9.45313	4.15192	7.75116	7.38006	7.09359	7.31795	8.46423	7.8236	4.96584	9.86444	10.4072	5.21525	11.2634
Pf4	14.043	6.60111	5.50666	9.98953	8.99509	6.09309	5.54256	5.91309	7.60639	7.25129	5.84144	6.10563	3.48525	5.81656	5.83964	6.34819	19.446	7.39317	7.8299	8.60588	5.0226	5.41513	8.85749	6.54702	8.75939	6.19213	6.13241	5.24039	9.10839	8.7368
Galt	5.05165	7.00389	6.88221	3.81077	7.66387	6.19741	6.14228	19.1165	6.43262	6.41388	6.73906	5.85588	7.53609	6.09605	6.25447	5.29181	4.89009	6.72716	3.17269	5.04873	5.65694	5.54172	8.07746	6.68495	7.8711	14.2909	4.77492	5.24039	4.81474	5.61517
Socs1	4.96088	5.60759	4.736	4.81842	7.00764	5.2633	4.12065	23.2881	5.80877	5.81974	6.57795	9.23018	7.12337	8.20013	6.4938	6.64576	5.16838	7.35703	6.54123	5.71491	7.07236	6.16528	18.5001	5.39302	5.5815	2.47858	6.90381	6.35684	4.82335	4.60453
Hras /// LOC367858	10.3212	8.61054	6.78364	5.98639	8.82166	9.98604	10.2049	9.94497	20.6981	5.7215	5.59287	9.67654	9.7475	9.49211	7.52558	6.33331	7.77246	8.9575	8.76995	5.78614	7.47473	23.9063	6.75858	8.75388	6.09928	11.5826	11.2219	4.47445	11.0894	5.47821
Ptpn18	22.4715	9.71147	7.77385	5.01537	5.67642	3.65112	6.29221	8.73241	9.24227	7.62087	7.70112	5.58487	7.57176	6.09605	8.19038	9.6066	8.38869	7.26409	13.1608	6.58639	5.8747	6.2403	6.5841	9.23663	5.65751	7.82574	10.666	9.42058	9.78021	6.5833
Ngf	6.59938	8.22118	7.39748	7.04901	24.5619	20.745	5.77471	5.86818	6.49732	4.41159	8.09239	7.53506	5.49284	8.4849	7.97765	7.89556	8.27438	8.95234	4.82955	5.11577	5.2877	7.35145	7.22558	7.04356	8.42213	10.5686	4.07678	12.1381	10.5812	6.07326
IgG-2a /// Igha /// LOC100359993 /// LOC100360169 /// LOC100360344 /// LOC100364193 /// RGD1565478	5.76424	7.50513	5.16166	7.73604	7.64981	7.18369	8.06234	7.33522	6.11838	7.05012	7.71954	7.18434	6.22658	9.66086	6.30766	5.79273	7.21089	6.23669	11.7155	6.64924	6.31494	5.39169	24.3709	6.57461	5.71926	13.1122	9.29127	5.55628	5.25401	8.9446
Afm	10.3439	7.59016	10.6997	6.64594	8.80291	11.0387	10.94	8.77233	20.9106	10.8161	20.01	6.53605	8.79466	7.38803	7.31816	7.20619	5.02924	8.9162	5.06456	7.93132	5.49599	6.32469	9.87872	7.20908	9.9422	7.49208	6.92536	7.85842	3.41941	4.70843
Ly49s7	5.12881	5.02132	6.19668	5.73447	19.5089	6.14051	6.03587	6.29232	5.12946	5.1835	7.63207	9.90504	6.09919	9.69778	8.98283	5.58938	8.12033	6.21088	7.54396	6.59477	5.99778	6.13246	6.83556	5.92634	3.09714	6.1228	7.93378	8.56377	7.38576	19.6791
Cyss	4.8111	3.43705	8.51315	6.04135	5.92017	5.84178	5.69732	6.66657	6.20618	3.30752	7.34207	21.8825	5.82914	7.28256	6.20661	6.6904	5.50135	6.88205	5.60509	18.1	6.13979	6.91543	9.90951	5.86657	8.98266	8.11606	6.92105	5.50436	5.40043	7.38142
Plaur	8.83699	9.1431	5.892	5.71157	6.00454	6.09309	6.28737	18.0486	5.48067	5.70747	7.30065	5.70177	7.9692	21.853	5.829	8.70893	7.77246	8.13661	5.16248	5.8029	10.3908	10.4083	8.85749	6.01829	7.60509	4.97883	7.29167	7.62907	6.51153	7.51365
LOC100359951 /// LOC100362149 /// LOC100362684 /// RGD1562259 /// Rps20	14.0248	11.0362	12.6712	12.9575	10.2044	6.41079	7.58837	7.58472	6.56663	7.20451	4.6308	7.65728	8.1883	8.84349	9.46149	8.3568	7.0618	7.58419	14.4691	7.08498	8.25108	8.45792	6.93307	7.49873	7.28683	10.235	14.6652	14.5571	24.7585	13.7475
LOC100361311 /// LOC100910109 /// LOC100911966 /// LOC100912746 /// LOC100912819 /// LOC305779 /// LOC684838 /// RGD1560194 /// Rpl7a	11.8144	5.35697	11.6316	5.99097	5.26862	9.0045	9.14087	11.3072	5.51764	11.0641	18.8178	10.3036	6.84821	9.60286	5.68008	9.90913	8.99498	9.11239	11.1083	5.84061	5.91257	6.70914	6.92793	9.43433	7.48634	10.235	12.963	14.3494	23.712	7.66477
H19	14.5558	6.54741	13.0878	22.5257	8.63885	8.36911	8.64755	3.87719	6.11376	8.90271	7.32826	8.41184	8.76408	7.53041	8.41908	9.6314	20.3505	8.61159	8.68378	6.16741	6.75992	7.45929	10.0327	7.1585	8.94465	7.03277	9.84289	11.6016	10.2712	10.8195
Rps3	7.4799	21.4279	5.18854	5.25813	5.13269	7.83804	7.28851	7.90907	6.94095	7.05012	6.06239	8.59251	7.73991	8.26869	7.9351	8.10386	7.52398	6.27283	8.15892	5.32945	6.45696	6.82635	6.9382	8.64813	7.32008	11.7776	9.3947	11.4458	16.7482	5.89852
Rpl3	14.5558	10.0963	13.3432	6.44899	9.44977	11.2947	9.00545	9.57072	10.661	6.06301	19.4254	10.091	9.60483	5.09937	6.74377	8.38656	10.0634	9.82486	7.81031	6.26378	6.67471	4.94629	8.7138	7.72861	8.37938	10.4257	8.54142	13.8128	23.7033	9.18545
Serf2	6.49498	12.9248	4.84801	8.67499	27.0462	7.18843	8.01881	6.22247	5.42983	6.00687	5.9289	9.28332	6.5323	7.38803	7.40857	6.91358	10.128	7.10921	5.44842	4.43283	21.1603	8.33134	8.70867	7.77459	8.10862	4.60185	10.2997	8.06613	7.43744	9.99773
LOC100360117 /// LOC100910370 /// Rpl8	10.2485	6.82936	7.20929	7.7223	5.7233	6.29699	7.77699	6.41208	6.58974	6.23143	4.73667	8.01862	8.28002	9.31809	9.4934	5.98615	10.2722	9.84551	15.225	5.98306	6.35281	15.0592	6.82017	5.67347	6.37004	8.27639	9.70068	10.7274	4.50467	5.34598
LOC100360522 /// RGD1564744 /// RGD1565054 /// Rplp1	7.32104	9.40267	5.65452	8.68874	13.1294	5.77066	8.29449	8.66754	10.8181	20.4814	8.46065	9.75094	6.82274	9.41829	10.0359	6.59617	9.39751	9.40667	17.3676	6.49003	7.88658	8.84706	6.78937	5.99071	6.37954	6.41312	7.1236	7.04921	3.39357	5.48766
LOC100362640 /// Rps4x	9.7629	5.20929	4.69567	4.98789	5.85923	5.87498	5.84242	6.8013	7.24594	8.75301	6.14525	6.2491	7.23547	6.08023	4.2122	18.3602	6.52509	6.1386	12.8083	6.28473	5.9315	6.43721	7.23584	6.95161	6.22278	8.43672	6.68403	8.48588	5.95598	5.42154
Chchd2	7.58883	13.0411	9.08667	25.2784	9.16384	6.38234	6.74199	6.17756	3.22555	6.17997	8.05557	7.15246	7.12846	7.85736	6.39807	7.37977	8.25451	9.19499	6.88984	6.44394	22.7792	8.70172	9.47331	6.90104	9.78544	9.42469	7.80881	8.25653	6.08949	9.10989
Rpl23a	9.61312	6.44895	9.34206	9.32997	9.78726	11.0434	6.03587	5.71848	22.5696	7.34018	8.29954	5.89839	8.69784	8.42689	8.09997	5.17774	7.81718	23.7903	6.98384	5.54732	9.51028	10.1692	7.45651	8.39067	6.94481	8.28506	9.4852	8.14835	6.85605	8.35899
Nedd4	8.74168	7.60359	20.9065	11.73	8.44198	6.89919	8.68624	7.16557	10.5454	8.97289	7.39731	8.42247	5.26864	4.56676	8.78605	8.31712	7.74761	25.1997	7.01126	6.09199	6.73152	6.52629	7.31795	4.8413	6.18953	7.73908	9.7136	4.53504	13.2169	8.38733
Fau /// LOC100360647 /// LOC687780	8.54651	7.53198	4.84353	11.4186	7.93105	9.55928	6.46632	8.43301	4.38546	8.47699	8.8197	7.32782	8.73861	6.16987	7.81277	8.82795	8.60735	6.21088	17.3676	7.0766	7.02975	5.57923	6.54305	5.28267	5.64325	9.82334	9.92477	6.22269	21.3261	6.19605
Rps16	9.61312	5.16453	9.33758	5.72073	5.59674	7.49664	6.40828	7.98891	6.25702	5.70747	6.77128	6.80174	8.20359	6.85014	7.50431	6.91854	6.85805	18.7307	6.08687	5.50961	6.43802	6.28718	6.09145	3.82522	7.98511	11.9943	10.2221	12.0646	23.7033	10.6495
Itm2b	4.93818	7.87211	5.86511	6.90244	8.14199	11.2663	9.63902	7.59969	6.83004	23.017	7.56763	7.0143	6.36925	6.41772	8.49885	6.16469	3.54333	6.35027	5.31132	7.02632	5.52439	6.4419	6.5995	5.6137	20.0459	6.72511	6.11518	5.58225	6.37372	4.87844
Sf3b5	8.79614	8.18538	6.1922	5.73905	7.87012	7.44922	8.06234	8.38311	10.1619	7.93431	4.93001	7.66259	7.76029	7.4724	6.83418	6.36803	9.14903	7.24344	17.3676	7.04727	6.18713	17.3894	9.03197	8.21136	9.94695	5.85847	4.15435	9.13065	6.8862	7.5042
Ctsa	12.4135	9.89496	12.6129	6.2612	7.89356	22.9119	7.5255	11.0527	11.3125	8.10741	5.14636	8.54469	8.35645	7.83099	8.96687	9.14536	8.32905	9.26727	8.33518	12.5485	7.46053	8.57982	7.25637	6.65276	6.72155	6.68178	9.28696	5.78563	4.94825	12.5102
Csnk2a2	6.71284	11.1749	3.94293	22.6997	7.67794	9.47867	9.344	6.29731	9.07591	5.21625	8.03255	6.31287	8.56536	7.52514	8.41908	7.21115	5.63056	6.51549	5.37791	6.89644	6.8688	19.171	7.87732	5.65048	7.10632	11.2706	7.97257	5.46108	7.7389	5.46404
Actg1	13.5482	10.8303	13.3432	6.10089	9.96069	7.07937	6.97414	6.951	6.67754	6.76943	8.63097	24.0187	7.46476	8.81712	7.733	7.32026	10.4213	10.8264	9.87452	7.73859	4.31726	5.81834	6.84069	9.34238	6.38904	7.81274	22.5904	11.766	7.73029	5.601
Amfr	26.4157	10.2888	12.8504	8.69332	9.46852	9.4929	9.48909	8.17353	6.95943	7.81736	7.78858	8.30557	9.09019	9.33919	8.03083	4.62228	9.38758	8.98848	7.35987	5.75681	8.98483	19.8508	8.78051	4.79532	7.10157	5.60715	5.63251	11.6838	10.3831	11.6318
Eif5a	7.41635	7.14263	9.79908	7.0032	6.44047	11.5935	9.63418	6.63663	11.2525	8.36471	9.57462	9.71905	8.34626	9.49739	7.62663	11.4615	11.0921	11.6318	17.3676	7.60452	7.27118	8.44855	6.18382	5.97232	5.41999	5.83247	12.0321	10.6409	19.9308	10.3661
Rpl11	11.8144	4.86916	10.4443	7.89177	7.12951	6.63839	6.87742	7.83921	6.59436	6.54955	9.01303	8.73599	8.11697	7.96283	9.80187	5.19758	5.86413	8.05401	17.3676	7.64642	7.60255	8.08754	6.30185	5.56313	6.73105	10.235	14.3075	14.3234	24.7585	5.1004
Itm2c	8.72806	5.83136	25.8128	7.16809	8.17949	7.6057	8.06234	6.12766	5.98437	7.28872	8.12922	6.36069	8.15264	8.22123	8.74882	21.8963	7.86191	6.04567	5.18207	6.95091	7.02502	8.1016	8.60603	7.17689	7.31533	9.40302	12.0924	11.6059	14.0696	13.0155
Hn1	10.1895	23.9878	12.9489	9.33913	10.7013	9.5498	7.21113	7.90907	7.59253	7.84075	7.42493	7.15246	8.34626	6.86069	7.76491	8.31712	7.6184	8.3741	17.8102	7.92294	7.27118	6.30125	9.44765	6.48265	9.67619	12.7266	7.00293	12.1381	11.1196	6.19132
Psenen	12.704	7.15158	9.66915	8.3498	6.73108	5.57625	6.96931	6.90609	6.58974	7.86414	7.0843	9.71905	9.23796	20.6823	8.15315	5.92663	8.21972	7.64098	6.75275	7.97741	3.53144	6.57317	9.20132	5.17693	9.53843	10.1093	24.4392	9.56771	13.3504	9.176
Tnni1	4.46161	5.21376	5.08101	6.61388	5.59205	22.2434	5.01539	5.44902	5.40673	5.65133	6.28795	7.822	8.39722	7.66225	6.35552	6.02086	17.7216	6.86656	5.89886	5.76519	7.26171	8.37822	6.56358	5.02521	5.22049	2.8859	6.52027	8.08344	4.81474	7.9623
LOC100911575	8.37857	4.85573	4.99587	7.73604	8.32011	9.77266	8.88937	8.8871	4.7875	7.1203	5.59747	6.36069	7.10298	7.3142	7.66386	9.85458	12.4141	25.8761	7.00735	5.02778	7.5126	7.07484	7.12807	8.16998	6.42704	9.62401	5.90832	8.94891	21.0419	5.47821
Cyc1	4.70217	6.91439	4.77632	8.3498	5.48893	24.6521	12.9181	11.1775	8.10547	9.0992	5.59287	7.26936	6.64949	8.25814	6.37148	6.12005	9.76526	6.67037	17.8298	7.84334	6.24393	5.7949	5.50642	8.55158	5.572	7.0111	9.50244	11.9997	10.7707	5.41209
Rpl27a	4.59778	4.77965	6.77915	8.34064	8.79353	8.20316	8.52664	6.11768	5.33279	10.0723	7.17636	9.52775	10.5831	5.95894	6.16938	7.24091	9.16394	22.2415	5.90669	5.29174	6.74572	5.05881	7.15373	6.33093	5.53875	5.28216	5.24035	4.89853	19.8274	7.4192
Col6a1	8.24241	11.1033	9.9559	19.8645	11.095	7.90443	8.60402	11.427	9.49181	7.81736	7.40652	8.23117	10.0379	9.37083	8.2808	8.28737	9.76526	9.30857	14.4416	6.63248	11.9956	7.05608	8.43668	9.42054	9.07766	12.6746	6.11948	12.2593	13.0532	6.93749
Mat2a	6.61299	10.2888	4.90178	10.1315	16.8793	9.23685	6.50017	6.77136	7.53245	6.58698	3.30508	7.69447	7.84691	6.74995	21.8002	7.09212	6.6692	6.34511	6.01245	3.82111	8.60612	8.22819	9.22185	6.85966	6.95431	7.60908	4.84387	5.02402	9.48737	11.339
Rpo1-3	10.1078	5.77318	11.2822	10.0491	10.0216	6.56252	7.02251	6.94601	7.74502	6.53084	8.34557	7.13652	9.45196	8.05775	8.21166	10.1869	10.3169	10.94	5.56984	6.35595	5.99778	7.35614	6.8099	6.18381	19.4996	9.27736	10.3169	8.54214	21.8687	7.80173
Hmgn2	11.3379	4.92286	10.6952	8.30857	7.74825	8.02771	5.73602	5.88315	7.54169	5.58583	7.3743	8.68816	6.59344	8.622	3.54207	8.9817	5.06899	5.24027	7.61055	16.9855	7.88184	6.02463	5.8092	8.08722	6.98281	11.3616	9.71791	5.68178	20.5854	5.86074
Tnnc1	6.69923	4.95867	9.3331	7.20473	7.49044	21.9731	5.27172	5.93804	5.98899	5.30982	4.62159	8.87415	7.73991	23.609	6.96714	5.2075	7.55379	7.73391	6.06337	5.42581	6.10192	6.1184	7.08702	5.74703	5.93777	4.36785	8.10185	7.72427	5.34445	7.40975
Ndufa8	5.32398	9.30869	9.46752	7.46123	10.2091	5.6616	7.92692	7.23043	7.24594	8.16823	7.90827	7.64133	8.1985	16.9012	6.08428	8.59486	11.1319	9.07108	4.86871	6.73304	6.44749	5.62611	8.16983	6.10565	6.6788	8.20273	20.19	6.27895	10.9171	8.75569
Tenc1	18.8722	4.46191	9.74532	8.3727	5.71861	10.0335	11.1432	9.72541	7.28753	18.3107	9.5562	7.23217	8.26983	8.47435	8.04147	6.34819	7.37489	7.57386	7.4147	7.73021	6.65104	6.73258	7.74902	7.82976	5.81426	11.1363	4.77061	11.0433	8.97058	5.25153
Igfbp7	9.87637	7.57674	5.64108	25.2784	11.6763	9.31746	8.88937	9.18649	7.70343	7.47585	5.36731	8.28962	9.05962	10.1671	7.27561	11.9029	10.8735	11.9003	9.54942	9.98433	5.95044	8.20475	8.50853	22.3445	7.8236	5.0135	10.1833	10.6149	6.11532	8.67069
Mlf2	7.00786	8.36887	6.58649	7.52993	8.5451	11.418	24.9367	6.68653	7.93449	10.4372	6.45366	6.53605	6.71064	8.32142	6.27575	7.08716	11.2114	9.34988	8.12366	9.50251	8.19901	6.00588	7.66178	22.1743	5.45325	14.6895	11.1056	11.7227	8.60021	5.94575
Ube2s	8.8733	10.705	14.4186	8.7895	11.8169	7.28801	9.70673	11.0527	9.08515	8.97289	8.50668	9.1239	8.70294	7.5726	8.52013	9.39334	9.96405	5.26608	10.513	8.41734	7.1339	18.81	7.30256	10.2803	8.62639	21.5143	9.4852	12.229	10.9215	13.1619
Arhgdia	8.96861	11.1749	6.46551	8.43682	11.3669	11.3896	11.5639	9.94497	8.72008	17.7165	6.77128	8.86884	7.29151	6.62339	8.64245	8.56014	8.27438	5.7772	18.0804	5.06549	10.5091	11.4351	6.44041	6.94701	6.20853	4.95717	9.44211	5.22741	9.5735	6.21494
Tardbp	10.8114	8.00637	25.0376	6.11463	4.37333	6.18793	6.20031	5.85321	7.26905	7.48052	7.30065	9.29394	7.6431	25.3281	5.57372	8.332	5.12366	8.24503	7.50871	7.45787	6.07825	5.77614	8.2776	7.02517	8.22737	6.38712	7.24426	7.73293	6.8173	7.03194
Sec61a1	6.35428	6.74432	6.63578	10.0216	9.28571	6.02671	21.9139	8.5877	8.88182	6.71797	7.33747	8.32682	6.55268	6.94506	8.69563	5.85224	5.63553	7.84233	5.46017	5.83642	10.76	24.7502	5.95802	8.64813	7.20607	7.98173	8.33457	6.5256	10.0128	5.82296
Col6a2	4.7884	25.6078	8.97017	12.243	9.16384	8.73897	9.42622	7.57973	6.80693	9.65123	8.18906	7.09932	6.60364	7.59896	8.67436	10.4547	9.02976	8.16759	4.19109	5.96211	10.689	11.5429	18.3103	9.55846	9.56218	14.7328	11.1616	9.61964	8.30306	7.60338
Rnf181	10.8931	5.3525	21.359	10.8094	10.3216	6.32544	5.67314	7.38512	6.80231	6.37178	7.2316	8.50749	5.49284	7.3933	7.71704	7.14172	20.6984	7.43963	5.94978	5.62692	5.99304	6.77478	7.18452	5.9953	6.70255	7.95574	4.36552	9.24749	9.10839	11.1973
Dstn /// Dstnl1	8.5692	7.94371	9.56609	11.4323	27.0462	6.65736	7.74797	7.27035	6.98716	9.45942	5.5054	6.42446	7.16922	5.88511	8.23293	11.1639	10.8635	6.50516	9.92936	8.46343	23.5035	7.20142	6.46094	9.01594	6.30828	6.47378	4.80078	6.11018	4.87934	5.95992
LOC100360843 /// LOC100362339 /// LOC100910073 /// LOC100910336 /// Rps19	11.5058	10.3112	13.6793	7.03526	7.37326	6.91341	6.13744	7.02086	5.77642	7.07819	7.49858	4.54867	8.50422	9.08606	8.18506	7.02765	6.52012	7.22796	17.8102	5.89507	7.00135	5.1057	5.65525	8.39067	7.14432	14.7328	12.963	9.56771	23.712	8.60929
Pdha1	12.7857	11.5956	13.3432	12.9575	10.5982	6.34441	8.85068	24.8899	5.32355	5.72618	8.35477	9.44273	9.9615	9.87707	7.40857	10.7225	9.63606	8.03336	3.77981	5.59341	6.01671	6.1184	6.98438	6.64357	8.42688	9.53735	12.5923	13.8128	14.0265	14.0592
Uqcr10	19.6347	9.47875	8.04269	12.898	7.32169	7.5488	9.61	5.55381	6.44186	7.40099	3.24524	5.62207	6.22658	6.67085	7.6479	9.45781	8.13027	5.79785	6.54907	5.27498	24.1473	7.20142	6.2454	6.68955	6.11353	5.77181	5.92987	10.338	5.04299	9.51131
Flna	6.71738	9.28631	6.12499	8.01544	9.74507	7.63889	7.17244	9.93	6.19694	7.15772	9.257	7.49255	7.32718	4.07106	8.11061	7.60791	8.50299	9.15885	7.8534	7.94808	23.5509	10.1082	7.52835	7.38379	7.88536	13.0776	11.1013	9.55473	12.7819	23.4382
LOC306766	27.4913	5.97457	14.0557	4.823	4.64051	9.2084	6.08908	6.12267	7.45851	4.26657	17.3356	9.007	8.40741	7.68861	8.65309	5.65386	6.65926	7.49642	5.96937	5.73586	7.30905	5.94961	7.4719	6.15622	6.96856	13.7449	13.4068	14.2932	9.88788	8.07092
Tubb4b	8.59644	17.512	11.4121	7.88261	9.2154	6.60046	7.05153	6.73643	8.67849	4.87474	8.23049	8.24711	19.8262	6.57065	9.48808	9.6314	7.3898	6.95433	10.5756	7.6548	8.80021	8.60795	9.42199	5.82059	10.1797	5.37749	9.73946	8.21759	6.56751	9.01071
Txndc5	23.4655	8.07797	6.34454	4.99247	5.39518	11.5698	11.0464	4.64065	9.98627	10.9799	18.1596	10.4417	9.5182	9.78215	7.21179	7.56824	6.71393	5.46743	5.37008	8.27908	5.89836	6.37157	8.28786	6.68955	8.16562	5.35582	9.3947	4.31867	9.2462	7.44753
Gpi	26.688	6.0775	13.6793	7.08565	5.36237	11.7594	6.1713	9.4809	8.48903	23.017	7.92668	7.84857	7.33737	8.40052	8.802	6.34819	7.87682	7.80103	4.72379	5.88669	6.47589	5.13852	9.75556	8.60676	9.9422	7.18009	9.78687	9.07873	6.12824	13.3933
Cbx3 /// LOC100360453	13.8206	10.7274	13.1147	8.42308	11.7278	7.27378	6.93545	6.16259	4.35773	8.35536	7.74715	23.3279	8.20359	7.81517	9.17429	8.91723	7.88676	8.33796	6.50206	7.27771	7.1623	9.63941	8.20062	6.95161	7.43409	10.287	8.74397	13.8128	23.7033	10.8195
LOC100365504	5.2332	6.84726	2.85863	6.92534	7.35919	5.93188	6.11326	9.51583	6.3402	22.7457	17.9754	6.69547	6.65459	5.7691	6.74909	6.23908	5.25287	6.58776	5.25649	6.75817	8.85701	8.40166	8.43155	6.43208	7.29158	4.77517	7.54593	5.47407	4.81905	6.29522
Rnf5	10.1033	18.5547	4.37307	8.40018	8.92009	8.35963	6.67912	7.82424	6.95481	5.90863	7.71954	10.0698	8.1934	6.25425	9.61572	6.249	8.45329	10.6819	18.0217	6.59058	5.6522	5.86053	8.68814	7.41597	5.00198	12.6182	11.3167	6.46502	9.95678	7.8584
Cct3	8.02455	4.87364	22.3493	4.85049	5.50768	9.61144	6.1713	5.62866	10.0695	9.41732	8.40541	23.5404	8.01506	5.13629	7.63195	6.9235	6.47539	6.13344	4.82171	7.94808	5.71374	7.19674	6.70213	7.40678	7.7381	14.7328	14.3075	9.2172	11.5631	4.97289
Coa5	7.97008	5.83136	6.03537	5.63829	8.14199	17.9948	6.94029	7.18553	6.28012	7.86414	8.56652	6.62639	8.09659	6.70249	8.21697	7.19131	3.63278	7.1247	5.45233	6.7079	9.15051	8.10629	6.17356	6.01829	8.59789	24.8725	12.3381	4.6086	8.95766	5.59155
RGD1562987	5.08796	19.508	4.11768	7.27344	6.2436	7.90917	7.18211	21.347	4.38546	6.31564	8.14763	7.65728	6.99089	9.31282	6.35552	6.4573	5.40693	6.81493	4.43394	7.04308	7.42266	7.38896	7.76442	8.89641	7.34858	9.45502	6.53751	8.73687	6.94649	5.29403
Wdr83os	5.3376	21.8083	6.64474	6.33907	10.1107	10.1188	7.10956	9.27132	9.38553	8.57056	6.77128	8.56595	6.73612	7.48822	6.13215	6.35315	6.1474	7.2073	5.10373	16.4744	7.54101	8.93614	6.64568	3.72867	3.73367	5.23883	5.50754	5.88516	5.31	6.47468
Nrep	13.2623	10.4857	8.60724	12.1697	11.4982	9.0946	7.39008	10.7234	10.929	11.2325	6.97382	9.01762	19.3829	7.40912	6.66399	9.16024	10.7741	8.90587	5.77744	9.54859	12.0524	10.5818	7.14347	5.63209	8.62164	12.7006	12.5967	10.6495	18.9963	13.5444
Cct2	11.2471	8.21671	7.15553	5.14362	7.10139	6.74745	6.64527	5.69353	7.34298	8.08402	6.84953	8.44904	4.73872	8.22123	6.86609	9.65124	5.97843	10.2172	8.42918	6.06686	6.14452	5.387	7.45651	17.2549	7.8331	13.6755	12.2217	24.2373	7.95854	9.77577
Oxct1	7.79307	6.45343	4.81665	5.99097	5.82642	21.0911	4.23672	6.86617	6.81155	7.21854	6.75287	5.62738	5.8648	4.99918	5.89282	21.812	7.67306	5.30222	8.99713	5.61017	6.2392	7.03264	10.7973	5.35164	8.45538	8.0034	8.57159	8.884	4.35394	8.49123
Morf4l2	13.3168	7.08892	13.1819	7.40627	9.55758	6.58149	7.08538	6.59172	6.90398	6.87235	9.3997	10.378	9.60992	9.61868	8.99347	6.6904	5.90389	7.37251	17.3676	9.10028	7.25698	7.21549	8.40589	7.17689	8.17512	8.06407	6.45563	23.9388	6.41678	7.61282
Srrm1	11.8961	10.0247	6.62681	7.03068	6.37016	6.08835	5.81824	7.46995	6.24778	7.89689	6.58255	8.66691	9.67107	9.74524	6.53103	6.18949	7.10653	20.8113	3.50171	18.7955	4.05217	7.17329	10.4791	8.23435	8.49338	7.9254	6.45563	9.46819	6.52876	10.0827
Spcs1	8.62367	3.24014	6.32213	5.81234	5.34362	7.10782	7.14342	5.85321	5.89657	7.08755	5.51461	8.40653	7.87239	6.86069	6.46721	5.27693	5.8194	6.6807	5.88319	4.97331	16.1708	5.65893	9.81714	16.579	8.38413	4.82284	6.70989	5.66879	6.09379	4.74621
Pex5	14.7465	6.90991	5.37225	8.59255	5.48424	7.38284	5.2427	8.36315	7.7173	7.60216	6.67922	8.18335	7.71953	6.09077	7.90851	5.99607	23.2031	5.30738	3.67797	5.53894	6.10665	5.7949	6.57384	6.53323	6.98757	12.6876	11.4676	11.7617	9.67686	7.49004
Sec13	10.1215	6.99047	11.8109	6.70091	5.44674	9.0377	9.46007	7.23542	5.82725	10.8021	7.97731	10.7127	9.57425	8.82767	6.0311	7.9154	6.0977	8.9988	16.2121	6.28054	11.2476	10.2208	8.2776	5.77462	8.7879	9.31202	14.6652	24.259	12.0756	12.7463
Pea15	11.2471	22.0902	8.0382	6.91618	5.81236	6.03619	7.19178	6.13265	7.03799	8.58927	5.05429	9.25143	7.83163	9.41829	9.74868	9.4231	5.43674	7.23312	5.46017	9.00811	6.91614	7.82967	6.45068	18.9376	8.32238	13.6495	9.60587	4.63889	11.1196	8.93043
Mapkapk2	4.63863	15.7576	6.66714	6.06883	6.39828	7.62467	7.04185	4.59574	6.95019	6.5168	5.09572	6.90802	6.18072	5.64781	6.64804	5.80264	6.70896	5.45194	16.592	9.53602	6.86407	6.00588	6.74832	10.2297	5.76201	5.42949	5.15847	5.19279	5.1808	5.72851
LOC100910270 /// Plac8	8.42396	7.96161	11.1029	11.2903	12.1872	11.1572	8.24613	9.66054	7.01488	11.0641	7.82081	9.03357	8.58065	8.9595	7.87128	9.33879	7.35998	9.32923	9.14598	6.36014	9.96947	10.2536	9.82227	8.34009	24.6394	25.0762	13.2819	14.2932	9.75007	12.2268
Pin1	5.60538	5.47333	7.45573	14.4965	5.80298	6.05042	8.72493	9.10666	5.57771	9.11323	8.93017	6.0578	6.20619	7.00307	6.91928	6.95821	6.1474	6.41739	5.69126	6.53192	14.8169	5.19947	8.57524	4.18384	8.41263	5.68948	4.24916	8.37337	4.54773	5.66711
Ubl7	4.77025	7.94371	5.20646	25.2784	11.3669	11.5271	9.17956	11.4869	9.1822	12.5751	6.13144	6.67952	6.7565	6.51792	7.62663	8.332	5.28269	7.90429	15.3621	5.54732	10.2393	7.17329	7.95943	5.88036	7.80935	6.75978	4.62409	5.33992	4.38839	8.28343
Cox14	7.74315	15.4399	3.23948	5.70241	6.04204	10.8253	9.79379	10.1795	8.221	8.08402	4.25794	8.05581	7.17942	6.20151	7.80746	5.76297	5.26281	6.39158	6.28272	6.26378	6.53743	15.4296	8.94986	7.00678	8.05161	6.44779	7.32614	7.52522	5.58992	8.93515
Mtfr1l	4.62955	18.0669	5.39017	7.6307	9.26227	6.31121	5.94882	6.94102	6.50656	4.23382	5.47318	7.19497	8.50422	7.3933	7.66386	7.08716	9.22358	25.8761	6.23571	5.76519	10.1446	9.89258	6.43015	7.3516	5.47225	5.74581	8.11047	5.89382	8.63036	5.15707
Igfbp4	7.20303	5.7329	7.50501	22.6722	5.32956	9.28901	10.6353	9.62062	11.1323	12.5751	7.71033	8.98043	7.98449	6.74467	6.29702	9.12553	5.48147	8.37927	7.62622	9.32234	8.31736	8.93614	9.17566	21.0709	8.34613	8.28072	5.29637	8.67196	6.8173	10.6447
Phf5a	8.08809	6.44895	4.99139	5.7986	5.203	6.64313	6.0262	6.86118	9.15909	17.6557	4.20731	6.823	7.51062	9.05442	6.55231	7.96004	8.60238	6.01469	5.54634	15.9381	3.60719	5.48546	7.79521	5.20911	6.77856	7.8864	5.01194	8.46857	5.07744	6.88554
Zfand6	9.7629	4.94524	6.60889	6.60472	6.17797	11.8969	11.0948	9.74038	12.9392	9.60913	7.64128	5.83462	6.196	8.24232	7.91914	9.41318	6.73381	7.95591	14.379	7.31123	3.58352	6.38564	5.52182	6.06427	24.5776	11.522	6.3522	8.09642	8.34182	9.10516
Chp1 /// RGD1564956 /// RGD1565588	4.29368	8.07797	4.86594	6.15586	7.36857	8.31696	6.23901	6.76637	17.4633	6.17529	7.99112	7.96548	5.40112	6.79213	6.20661	4.94465	5.35723	6.04051	8.76604	7.92713	8.7292	18.463	5.46024	10.5837	5.36299	5.85847	6.56336	6.52128	2.95	6.92805
Adh5	13.8206	5.71052	14.0557	7.63986	4.93113	9.86749	23.3261	7.42005	7.33374	7.52731	6.34779	7.81138	6.72593	4.39801	7.16924	5.06863	5.72001	6.5826	6.25138	7.24	6.225	6.12309	7.06136	6.87805	6.6883	9.03903	13.2172	10.1649	24.7585	9.81355
Gltscr2	7.77946	6.58769	18.4959	10.0124	12.4497	7.50138	4.12548	7.2005	6.39565	6.7975	7.77477	8.19929	8.1934	7.00307	7.59472	6.64576	8.10542	6.55679	4.64545	6.24702	16.0903	6.66226	7.19479	6.66656	6.62655	5.82814	7.79588	8.29115	8.4624	8.18426
Clptm1	5.60085	8.18091	7.04799	9.12386	17.034	7.42077	11.4092	8.49289	3.29949	8.72962	5.45017	6.1322	6.89917	6.60229	7.11074	10.7671	7.19598	9.18467	19.0675	7.16459	6.5327	6.35751	6.55844	6.34472	6.21328	4.50218	4.82664	10.2774	7.05846	7.26335
Mtch1	6.18635	8.86116	9.24797	8.85362	5.03425	6.37286	9.62935	12.1006	6.83928	7.62555	8.2443	7.3225	6.54759	8.47962	9.15834	7.97988	7.64822	7.61	7.56746	5.51799	7.47473	24.7033	6.65595	9.07112	8.18462	9.29469	7.22703	14.2932	11.0205	15.5421
Cops4	9.84914	7.3664	4.88834	4.73598	6.85296	7.76692	7.72379	8.50287	6.61747	20.0978	8.57112	9.53307	8.5246	9.50793	8.42439	5.44556	6.09273	6.04567	5.15465	7.83077	6.03091	6.56849	4.17729	6.31714	7.77135	7.94707	10.1747	4.48311	17.5708	10.2528
RGD1307752	13.2986	5.01685	13.1192	21.6142	7.59356	7.42077	9.08767	6.3522	20.9892	9.02435	7.12572	7.40221	8.06601	8.16849	6.20129	6.08038	6.42569	7.28991	4.39085	6.98861	10.5423	10.2255	7.14347	6.34932	8.67389	5.9408	4.6758	4.20183	7.96284	10.5975
Mettl7a	8.0654	9.71147	24.8898	9.24753	7.02639	6.57675	9.03447	9.00686	8.55834	6.05834	8.61255	8.15678	21.5586	8.57982	8.14252	4.61732	6.72884	9.21048	8.34693	6.02496	7.86764	6.42783	8.02614	6.94701	7.57659	11.5696	8.49402	12.4324	11.2832	11.9671
Reep5	7.13495	5.71947	6.04434	6.35739	5.52174	10.868	23.4664	8.48291	12.9392	9.19276	7.19938	6.73266	6.70045	6.02749	6.16938	6.17461	5.27772	8.94201	8.08841	6.29311	9.14578	6.92012	6.49686	20.0778	5.94252	7.29709	5.2662	4.35762	4.60372	5.51599
Nnt	7.19395	12.6473	18.4959	10.443	6.50609	6.39656	6.46148	7.62464	6.06293	7.66298	7.25461	8.84227	7.76539	8.66946	8.02019	10.291	25.0518	6.88205	5.99678	7.26933	7.26171	8.00783	8.70867	9.35157	6.16103	14.0049	12.5967	9.33404	10.4994	11.8537
LOC685273 /// Snrpc	8.80976	3.89354	8.66549	10.4155	8.49823	9.45971	7.06604	7.75438	7.50472	7.05948	5.02667	6.61576	15.862	6.4019	8.23293	6.98797	5.96849	20.5842	5.53851	8.08216	8.05226	6.55442	7.83113	7.5447	7.02557	9.74534	11.6313	4.35762	5.82248	7.2728
Sh3bgrl3	11.9687	9.02674	12.1783	13.0262	11.5028	9.51187	9.70189	7.50987	11.6268	9.27697	8.29033	8.88478	8.04563	7.77826	8.802	5.71833	8.29426	7.15051	19.0675	7.19392	7.10076	7.92813	8.88828	9.94007	8.8544	10.235	13.2172	23.757	14.0265	9.24684
LOC100909548 /// M6pr	8.32411	10.338	11.8557	12.0277	23.451	11.5603	10.0066	10.5388	8.51675	12.5751	8.67239	10.1495	10.3691	9.10716	9.17961	10.8961	11.9668	10.3773	8.34693	8.79443	7.19544	23.9438	7.86705	9.81133	7.96611	4.9355	10.61	13.8691	11.6062	12.1701
Smim24	6.59938	8.06902	23.456	7.46123	7.69669	21.6554	6.55337	9.60066	9.62583	11.429	7.35588	10.0326	9.27872	9.38665	8.20102	5.29181	8.77631	9.34988	4.89222	6.77074	7.4842	6.16997	7.08702	6.06427	8.08011	6.04047	7.95102	5.47839	6.04211	7.04611
Aimp2	5.85502	6.4579	11.0805	7.2597	5.02019	6.33492	6.32122	3.66761	5.8596	6.52148	13.5564	5.92496	8.32588	8.03666	5.98323	6.88878	5.39202	7.17633	4.90397	5.74843	5.25456	6.0762	6.21974	15.0067	6.54104	4.58885	12.0321	8.1397	4.97408	10.7864
Cd9	8.26057	4.84231	11.7168	5.55584	5.36706	7.67683	9.49393	6.58673	5.65627	6.60569	4.93001	7.15777	7.92844	7.64643	6.84482	8.5403	6.73878	6.26767	17.3676	7.32799	8.80968	5.66362	6.97412	10.7906	8.04211	25.0762	8.99392	8.77149	13.0532	13.0674
Ltbp4	8.21064	15.5294	4.34171	9.12386	9.0279	4.29599	9.61968	9.2314	10.9567	6.52148	6.6562	7.49255	7.40361	8.73802	6.35552	10.2017	9.63606	6.03534	7.4382	7.99417	5.02734	22.7295	6.55844	6.49645	7.46734	7.98607	11.1961	8.65898	5.76649	7.03194
Rbm42	8.02455	8.77165	11.8467	6.32991	8.64354	9.7205	8.62337	7.78931	4.50561	6.91913	15.4207	6.67952	5.73742	6.423	6.52571	11.5111	10.625	10.4702	8.34693	8.89079	6.87827	24.7502	8.69327	8.62515	8.33663	9.12136	9.19216	11.6145	6.6235	5.03901
Arpc2	5.51461	7.87211	4.50301	4.31002	5.22175	6.61468	6.86774	9.65056	6.89473	5.65133	5.41794	7.04087	6.99598	5.89566	7.75427	8.43615	7.92651	16.2319	12.1072	5.50542	5.86523	6.40439	6.08632	5.08038	6.69305	5.9148	3.83545	5.3529	9.65963	5.44515
Mrpl33	6.82178	7.23661	4.49405	5.08408	7.31232	6.5483	6.19548	9.37611	6.44186	7.56473	7.25922	19.3212	6.88898	7.86263	7.28093	5.86216	5.23796	6.19539	16.2512	7.81401	11.9293	11.8101	9.43739	10.9194	4.94972	8.00773	5.12399	6.36549	8.18248	7.2114
Kdelr1	11.5058	6.33707	9.69155	7.48871	10.9497	11.6978	12.9181	9.70545	23.2073	8.19162	6.28334	8.10364	7.0826	8.03666	6.42998	5.57451	5.29759	9.21048	8.14717	6.54449	11.9293	7.54368	7.70284	10.3676	21.0672	9.02603	13.8464	5.61687	11.7914	13.0674
Elof1	4.98811	4.51113	5.66348	3.00464	6.03735	6.05042	2.95506	6.87116	5.42983	6.42792	5.36271	7.08869	5.79856	6.77104	6.73313	5.50507	5.85916	6.86139	5.53851	5.79452	7.02975	5.58861	9.09869	18.2802	7.32483	5.76748	7.38648	14.2932	6.56321	4.96345
Xpo7	7.0351	9.4161	4.95555	8.94981	8.72791	5.72798	8.19293	8.85217	5.89195	5.74489	19.2873	8.59783	8.5297	6.57593	7.91914	10.9159	9.57642	10.2017	7.90432	7.01794	5.23563	5.71519	18.7003	4.74015	6.12778	6.90277	9.5283	7.40838	6.24022	8.93043
Grb10	12.2411	10.6379	11.9139	10.6216	8.14199	5.71376	6.91611	5.79832	6.2524	6.22675	7.57684	8.06644	7.50043	7.70443	3.82395	8.42127	8.62226	7.1247	15.6872	7.36151	6.15399	7.17798	7.19479	7.37919	6.21803	5.68948	10.2264	23.2897	12.278	7.10278
Gtl3	9.8219	8.70004	13.2447	11.1758	6.91858	9.14675	7.49164	9.49088	8.36888	6.38581	5.96112	8.3959	7.40361	8.44798	9.79123	8.25761	9.8746	6.32962	10.2505	8.89917	8.84281	5.87929	20.2501	6.27116	6.85456	7.77808	5.03349	23.6315	10.7793	12.9682
Rnf10	10.9475	7.76022	9.23453	10.214	6.83889	11.7215	12.9181	10.0248	8.31804	23.2462	6.82652	7.56163	8.10168	6.2648	9.12111	7.02269	5.27275	9.00913	5.41708	5.19118	6.79306	24.9237	7.63612	7.31482	7.88061	8.30672	7.352	5.69909	5.68467	5.88908
Fkbp8	8.86422	4.82441	5.09445	8.09788	7.39669	13.291	11.7235	10.2843	8.31804	23.017	5.17858	5.66989	7.7552	8.41634	7.95105	8.54526	8.88068	8.85425	7.80248	7.39922	5.92677	23.9063	6.52765	5.94933	7.05407	7.47042	7.23564	5.33126	7.24365	5.65767
LOC678880	12.5179	7.06655	11.7571	7.82307	18.0511	5.67582	7.59804	9.69547	9.12212	5.33788	7.79319	6.6317	6.08391	7.58842	6.25447	10.6035	10.4213	7.39317	8.35476	19.2355	7.65462	9.53157	8.44695	6.86885	7.96611	5.42515	5.03349	7.52954	5.96029	11.0934
Dctn6	8.28326	5.57626	8.93433	4.95583	6.03266	7.12205	6.08424	8.50287	3.68304	5.84781	8.35938	6.76455	7.64819	5.95894	7.82341	8.94202	6.32133	7.42931	7.89648	8.19109	7.46527	5.65893	7.19479	9.39755	18.1601	5.89747	18.449	8.19595	9.5089	10.6683
LOC100911440 /// Slc25a22	13.462	6.64587	11.4703	8.47804	9.44977	7.75743	20.816	6.67156	9.73211	6.5168	5.15556	6.46697	7.5259	8.68528	8.98283	8.26753	9.91932	6.04051	6.14954	19.2355	10.5707	10.4505	8.19036	6.98379	8.78315	4.79684	7.26581	10.8962	8.31598	6.48412
Pmm2	10.0216	6.19386	10.5832	8.96813	8.30605	6.719	7.45779	9.19647	6.74224	6.83025	5.58826	10.2876	9.52839	9.57121	9.40298	10.7225	8.18493	9.1795	9.79618	8.79862	24.971	7.56243	7.03057	11.5906	7.35808	23.4296	11.8296	8.5681	7.49343	8.65652
B4galt5	5.9231	23.4686	4.70912	6.53602	9.95132	5.80385	6.09875	5.77836	3.12389	6.02559	7.77938	7.49255	5.39603	5.72691	7.80746	8.02947	7.04689	5.47259	8.78954	6.0082	6.93981	15.8188	6.4866	10.0136	4.74071	4.43719	5.18863	3.74746	4.94394	6.7722
LOC100910210 /// Nhp2	12.0731	4.91391	7.54086	6.47189	7.14357	7.71002	8.7201	6.0079	5.48991	6.74604	8.06477	8.22586	7.638	7.26147	6.36616	5.92167	5.02924	4.02184	8.63286	5.25822	20.5496	5.673	6.23514	10.0366	6.39379	25.0762	8.99823	14.0378	8.34613	13.7475
Mylk	8.51474	5.77765	8.36081	5.70699	6.19672	7.14575	7.63674	6.04782	8.93728	5.95074	6.25572	7.84857	7.09789	6.54956	7.36603	26.0177	8.25948	11.2188	7.90432	6.0082	5.55279	6.9295	7.06136	7.38838	6.53154	12.4189	9.18785	11.6102	6.70963	24.1466
Tuba4a	4.8111	5.28984	4.8749	6.59098	6.63734	7.35913	5.96333	6.76637	6.95481	7.34485	7.62747	6.87082	7.77048	3.33279	6.86609	7.11196	5.23796	7.21247	4.79038	5.0613	5.82736	16.9018	5.94776	3.4896	7.11107	8.1074	4.68442	5.9068	13.514	6.09215
Erh	8.72806	5.26746	25.8128	6.19708	7.5045	9.38858	11.7767	24.8899	6.59898	6.13319	7.28223	7.08869	7.66348	8.25814	8.96687	9.24951	10.0833	8.30699	5.77744	7.34056	8.01912	7.71715	7.27176	6.68495	9.03491	9.57635	12.0321	11.766	6.71824	10.8478
Pecam1	4.40715	18.5055	8.15022	4.96499	7.78575	5.55254	7.41426	6.36717	6.7561	7.32614	7.5308	5.60081	6.9807	21.5471	7.5894	4.28999	7.27053	7.388	6.6039	6.6241	6.72679	5.26979	8.40589	7.63206	6.6598	5.39049	12.0881	7.40838	11.3349	4.48647
Mrps25	7.37097	5.66129	6.22804	4.41536	22.0026	5.93662	8.44442	8.5877	11.405	9.90386	7.01065	8.0877	6.62402	6.69194	6.55231	6.73503	23.4366	9.71127	6.5804	5.761	6.31494	5.98243	3.7924	6.64817	5.85701	5.32982	7.79157	5.54763	6.10241	5.1618
Dcaf11	7.48897	8.67767	6.32661	7.56657	5.72798	10.9581	6.61141	9.66553	20.6241	8.24776	3.64572	8.26837	6.22658	7.63061	6.85546	6.73503	8.78625	9.26211	6.86634	16.9017	6.44749	8.63139	6.66108	5.75163	5.79526	7.9514	6.91674	6.44771	3.41941	5.87019
Sprtn	5.51461	6.61006	5.99953	6.64594	6.59515	7.62467	7.45295	17.6345	5.98437	5.53905	7.60906	5.68583	5.79856	21.1252	6.61613	6.56145	6.45551	7.35186	6.58432	4.50405	6.60371	7.5343	8.78565	5.039	6.85456	3.0289	4.54221	6.002	4.71138	5.96464
LOC100910528 /// Mrpl36	4.92457	9.34449	5.27367	5.67493	9.32789	5.64263	5.64412	6.04283	5.78104	6.48873	19.7062	6.42977	3.92346	6.10132	7.19584	6.24404	7.33513	21.5393	9.37316	6.05848	6.31968	5.25573	6.40962	9.78835	5.57675	10.534	9.24818	4.53504	4.66401	7.9009
Tcap	6.94432	10.3649	7.05695	5.23065	8.48885	4.64687	21.8752	19.0416	5.23575	5.37999	7.39731	7.21091	5.6457	4.52457	8.84987	5.47036	7.55379	7.95591	4.85305	5.78614	5.12201	6.26843	6.67648	6.60219	5.82851	6.42179	4.48188	6.96699	8.27722	4.84538
Pias4	4.58416	5.41515	5.15718	5.47798	6.45453	17.2219	5.94398	6.71647	7.51859	8.59395	5.97953	8.21523	5.82914	7.29838	9.15302	7.22603	6.7835	7.14535	6.31405	5.60598	6.30074	15.2936	5.49103	3.12639	5.88077	5.13483	4.46464	6.08422	4.70277	5.25153
Thap4	5.60992	15.7576	5.39465	9.19256	8.75603	9.13253	5.65863	10.0597	4.14516	8.79979	5.17858	5.82399	7.13356	5.93784	6.35021	5.31165	10.0883	8.97815	16.4549	6.51936	5.49125	5.47139	8.68301	6.20679	8.8449	5.45115	4.64133	5.94574	7.65277	5.62461
Nadk	13.462	12.2579	8.70581	8.91317	10.0498	9.42652	7.03218	9.52581	6.27088	7.57409	16.553	8.91666	10.3691	8.68001	9.03601	5.95143	8.69183	7.23828	10.1448	9.66591	7.8061	7.9797	6.56358	11.5906	6.94481	8.84404	19.2764	11.7011	9.4443	6.51246
Kti12	6.07288	5.25404	3.64721	18.1744	6.0936	5.49564	7.01284	5.84323	6.82542	5.90395	5.46858	7.94954	4.17823	6.27007	6.46721	9.05113	7.57864	5.77204	6.33755	16.1853	6.98241	8.3032	7.21531	7.48953	6.94956	5.17816	6.36082	4.56533	6.15839	8.03313
Aldh7a1	6.54037	5.41515	6.66266	7.25054	4.51864	11.2758	6.9548	11.8861	8.48903	23.017	5.91969	5.54767	9.7424	16.7958	7.47239	5.08847	5.38705	6.60325	6.59999	4.96074	6.71732	8.54231	7.65152	10.3722	5.87126	5.35582	4.69304	3.29742	4.86211	8.28343
App	12.2592	10.7318	13.3925	9.99411	6.86233	6.68581	7.56903	7.87913	9.36704	7.22322	7.0843	7.73698	7.531	9.1177	8.81796	6.44738	6.89284	8.00238	6.33755	7.97322	5.10781	6.12309	10.0789	20.0732	8.51713	11.249	23.4221	7.93199	7.31255	11.8018
LOC100910291 /// LOC100912182 /// Rpl36a /// Rpl36al	4.85649	6.95914	7.40644	8.3956	5.13737	6.89919	7.41426	7.62464	5.08325	8.67816	5.58366	8.73599	8.02525	8.07357	9.06792	7.45913	7.13635	6.89753	6.95251	5.40486	7.35165	6.37157	9.0679	18.7537	9.20116	13.8402	14.6652	9.56771	23.7033	10.248
Ghitm	6.75369	25.6078	9.60642	7.78185	10.8794	6.68581	8.16391	6.34721	6.85314	6.57294	7.12112	6.68484	7.36285	7.84154	6.7225	5.37117	9.32297	10.8264	7.78681	6.90063	21.1224	6.65288	11.5466	5.63209	6.53629	6.45212	5.52908	5.65149	7.28671	5.32236
Erlin1	5.90494	6.0417	6.84188	7.27344	7.23732	6.44872	7.31269	24.7651	6.428	11.1857	8.73224	6.56262	6.70045	9.15462	6.27043	7.76166	8.25948	8.2915	8.59761	7.76792	6.11612	7.78279	6.72266	7.88953	7.42458	5.37315	5.86522	8.1397	22.6655	8.2551
Srsf1	12.5815	7.94371	22.3493	5.22607	8.59198	9.36013	8.24613	8.72243	9.59348	4.50048	17.2942	8.85289	8.10678	8.00502	8.74882	5.53483	9.63109	10.5528	8.7347	6.5403	5.66167	6.20279	8.42129	7.7516	6.72155	7.99907	10.4376	14.3234	5.9043	9.176
Ilf2	8.9323	7.04417	8.92536	7.29176	5.45143	4.63739	8.39122	6.41208	5.80415	6.80218	8.96239	8.03987	9.19719	9.34446	8.83923	5.5993	6.0977	5.5552	15.3229	6.80845	5.83682	3.19282	5.95289	7.25505	6.7168	12.5662	7.94671	14.0941	13.3934	10.2669
Rbm3	12.999	11.1033	13.1237	7.79559	13.659	10.0809	7.13858	8.54279	9.62583	9.83836	19.4669	8.84227	4.74382	7.85209	7.42453	9.93393	9.24843	6.36576	6.8115	7.24838	7.81557	8.47668	7.01517	8.41825	9.52893	10.235	24.7796	12.2593	14.0265	9.11933
Gspt1 /// LOC100911685	9.8219	5.50466	26.6775	5.40928	6.19203	5.60944	7.06604	5.53385	8.17479	5.97413	5.98414	8.56595	19.388	8.50072	6.15342	7.9402	6.39588	6.97498	7.90823	6.4188	6.39542	10.985	10.6023	7.46195	10.745	5.99713	6.68403	10.4202	7.10584	10.9564
Ubl5	7.23026	11.7209	7.35267	11.7987	12.4497	8.33592	9.35367	13.1136	22.9208	11.1717	4.86556	7.10463	8.81504	8.7222	6.24384	7.76662	8.71171	5.42613	5.64818	6.98443	10.2582	7.43585	10.1199	19.733	9.99445	7.75208	9.14044	5.76832	7.35992	7.19724
Csk	22.3535	6.01485	6.22356	7.68108	7.57481	6.35863	6.33573	7.83921	7.97608	6.97995	9.44113	9.03888	8.89656	8.55872	8.43503	6.56641	6.18218	8.62192	6.75275	18.7955	5.76108	4.73062	8.79591	5.90795	9.74744	12.6442	11.3167	9.38597	9.34525	4.59509
LOC100912446	4.4253	4.18443	4.84801	7.41543	7.65919	7.3212	6.89676	6.8512	6.5805	5.6794	5.77239	5.91964	7.68386	7.06635	6.74377	6.38787	6.12255	7.89396	17.3871	7.34056	8.48304	9.48	6.1325	9.79294	5.69076	21.7136	5.18001	9.76677	6.4943	8.01424
Rnps1	27.2054	8.80298	8.57588	4.96957	6.32797	7.41129	3.86431	22.2701	6.54353	6.41856	7.18096	9.74031	8.37683	5.86402	7.13202	7.86085	6.6692	8.48768	5.84794	8.18271	8.32682	6.55442	10.6741	6.07806	8.57889	9.19503	10.2437	12.0646	5.99905	9.10516
LOC294154	10.2259	6.67272	23.8637	7.42459	5.89204	9.48342	6.23417	6.53683	7.81896	7.28872	17.957	5.37231	7.94373	10.531	8.96156	6.17461	6.376	5.5139	5.72652	6.06267	7.8061	5.56985	6.2454	6.36771	6.22753	10.222	4.43016	11.4588	11.1411	10.6353
Tspan9	8.02001	9.51903	8.84023	7.09023	20.4229	6.15	7.12407	8.97193	9.36242	8.65476	5.31207	7.86983	5.87499	7.36694	4.4728	7.04748	7.77742	7.25893	6.18088	6.60734	10.7553	10.8256	8.98065	20.0548	6.08502	5.54215	5.78765	10.3683	7.7389	11.8018
Mrpl34	8.90961	5.52256	6.46103	5.04744	23.3854	8.92389	7.14342	5.77337	9.64431	9.15066	9.30763	8.06644	6.4202	6.30698	8.00424	5.68858	5.10875	5.42097	6.741	18.8961	8.98956	9.22214	8.83696	11.1538	7.30108	5.05683	9.71791	4.9721	9.6424	7.30113
LOC100910710 /// Ndufa12	6.11373	5.7866	5.68141	5.50546	5.21706	11.7215	10.1275	7.98891	12.9392	23.6018	5.98414	7.07806	7.94882	7.08217	7.07883	6.83918	5.57589	6.87688	6.12212	7.70926	6.52323	22.556	7.07162	7.88033	5.23949	6.68178	4.7663	7.66802	7.68722	7.68839
Dgat2	10.0534	6.3684	6.82396	6.55892	6.57171	23.4999	8.91839	10.938	6.20618	7.69572	7.0889	6.56262	6.34377	9.12298	9.22216	6.16965	5.22802	7.7907	6.56082	6.34757	6.93981	15.0592	6.66621	6.61139	5.53875	7.22343	9.36023	5.66879	9.47875	7.57032
Psmd13	5.12881	7.61254	4.86594	5.194	7.96387	9.88172	11.2882	9.12662	11.2525	3.78938	6.87715	7.52974	7.78577	18.7364	7.11606	6.62593	7.9613	6.3193	8.20984	12.3097	6.71258	7.54368	6.34291	5.816	7.14432	11.6346	8.04152	11.4025	5.27985	13.2374
Srp68	5.22413	5.57179	6.17427	23.5975	4.81863	15.2683	5.44099	5.8083	6.45111	6.14254	5.94271	6.39258	6.01257	6.28062	6.85014	8.19809	7.18604	5.91143	6.47465	6.51936	7.21911	6.26374	5.88618	6.85046	7.42458	7.00677	4.55945	3.66524	5.65452	5.04845
Ceacam11	7.35281	5.26746	4.74944	5.37263	5.77017	5.51461	5.79889	24.8899	7.51397	10.8863	4.93921	6.87614	7.3119	5.9062	5.91409	8.06915	8.01597	2.917	5.38575	5.69396	10.2488	8.35947	5.93236	7.31482	5.74776	5.49015	8.65347	7.77187	6.64503	19.0179
Cxxc5	13.8206	7.438	13.6748	6.69633	7.10139	9.61144	9.49393	7.18553	6.84852	15.5458	8.46065	6.67952	9.90036	9.6134	8.64777	8.39152	7.17113	8.31215	3.87382	7.00537	9.6523	7.50617	7.46677	6.59759	8.08011	12.5662	22.1077	8.50752	10.1549	7.70255
Eif1ad	9.60404	7.3843	9.62434	7.15435	10.3216	8.10832	6.26319	7.58971	8.68311	5.80571	6.6516	7.72636	20.1778	6.13296	6.85546	5.63402	7.61343	6.26251	7.61838	6.21769	6.20606	5.80896	8.02101	2.9011	7.34383	4.91817	4.1285	19.0619	5.49949	10.7581
Tmem126a	5.26498	23.0972	6.74779	6.41693	6.75921	6.69529	8.68624	8.98191	7.15814	6.70393	8.14763	5.81868	9.44177	7.83099	8.93496	9.34375	8.70177	8.79229	8.7347	7.34894	6.21553	24.6096	8.08259	6.84127	6.25128	6.53012	7.27874	7.97093	6.03781	8.82653
Zfp706	9.96714	7.72442	5.48874	6.10089	5.46549	5.87498	6.05038	6.28234	7.16738	7.00334	8.60795	8.38527	6.70554	7.59369	6.41935	9.29911	8.72165	11.224	15.7068	5.11158	19.5129	5.74332	6.27106	8.06883	4.05668	6.27446	7.36493	8.16133	6.14978	6.92332
Cct7	4.75209	5.00342	8.30256	6.2841	9.14977	6.45346	7.14342	6.63663	6.40951	5.98348	9.10049	7.3597	7.24056	7.99447	6.64272	8.22289	8.21475	5.5965	6.56473	9.65334	6.72679	6.69039	7.33848	23.0387	7.10632	5.06983	5.57218	19.3388	8.07051	9.27518
Eif4a2	7.50259	7.80498	5.51114	5.98639	23.7135	6.39656	5.02022	7.33023	5.95202	5.79635	6.01175	9.83064	7.46476	6.35444	7.82341	8.80316	4.86524	8.96266	4.58278	6.46908	8.51144	23.9063	5.87591	8.11021	5.82376	7.57008	4.54221	9.48549	4.51759	5.74268
Sdf2	10.7887	6.0954	5.17958	5.52378	5.62955	9.38858	7.51582	9.70545	5.06014	7.35889	18.4173	8.99105	7.44947	7.95228	6.79164	8.69901	8.68189	9.08657	6.01245	5.70234	4.93266	5.23228	8.47774	8.97916	8.08486	8.0554	7.01586	7.76755	21.3993	9.95051
Tm9sf3	9.47242	7.76918	4.95107	5.37263	5.95767	20.2329	9.14087	9.67551	7.29215	9.80561	6.42144	6.73266	7.00108	6.30171	7.9936	7.84101	9.14903	4.84273	7.84165	7.06822	8.35049	8.41104	6.8099	6.28495	19.9081	5.23016	13.506	10.814	8.5916	10.98
Senp3	7.20757	15.9277	4.97795	5.92226	6.21547	3.62267	6.67428	7.48492	5.1387	7.86414	6.26493	5.94621	9.04433	7.6517	6.80227	9.15032	8.73656	11.033	4.25376	5.61017	23.5035	8.3876	7.22558	6.06427	6.51254	12.4493	10.8901	12.004	8.17817	5.13346
Cct4	6.29982	5.47781	7.37059	8.90401	8.30605	9.34117	7.96078	8.73241	9.87075	6.91446	7.25001	8.35871	7.88768	20.503	8.93496	8.20305	8.82601	7.61	6.90551	8.44248	6.5469	6.07151	9.47331	4.28499	8.50288	10.625	4.78354	14.0508	21.3993	10.7722
Uba2	7.25296	6.31469	11.2866	6.86122	7.2092	9.30323	9.90019	5.94303	6.62209	7.41503	7.5262	8.87415	4.48395	7.44604	21.8002	9.39334	10.7045	8.81811	6.67833	7.04727	6.00724	6.32	7.18966	6.51484	6.54104	12.9996	8.69225	22.0867	10.5985	9.48769
Emc8	13.8206	5.30327	9.11355	5.77112	4.83269	9.56403	9.62451	9.84018	7.5001	8.16823	6.73445	7.21622	20.6058	7.14545	6.15874	7.04253	5.30753	5.35385	5.86361	5.40486	10.5091	9.49875	8.3751	6.18381	4.21344	13.6495	11.2219	22.0867	9.80605	5.36015
Rhoc	4.18929	10.5573	7.21825	8.18949	8.29198	6.43924	5.36361	6.29232	6.48807	7.67233	6.56874	5.28198	5.97181	6.15933	7.55749	5.54971	5.55601	19.8356	14.3946	5.02359	5.86523	3.61478	3.80267	5.37003	5.30599	4.25086	4.62409	4.95911	4.96116	5.79462
Znhit1	4.99265	9.161	4.65535	5.90394	6.39359	5.58099	6.34057	6.27735	6.05369	14.9049	9.18335	5.84525	6.72593	6.27534	6.25979	8.81804	6.26667	8.79745	6.79975	8.04864	20.0525	9.48	6.48147	10.3079	8.57889	8.31972	10.5367	9.68455	4.56927	5.686
Kars	5.62808	4.35897	11.7168	5.61539	5.59674	17.0939	7.33204	6.71647	6.95943	7.61151	4.21651	7.97079	7.68896	6.62866	7.2437	9.19992	7.52398	5.80818	7.36378	9.26369	7.57414	8.19537	6.1479	7.83895	6.11353	25.1065	14.2989	9.2172	10.3788	10.5928
Mfsd5	5.55546	10.0247	8.46834	8.85362	12.3372	22.9119	10.8868	8.51285	11.3911	8.19162	6.96001	6.93459	8.3055	6.86069	9.40298	6.82927	5.84922	6.4019	9.04414	7.26933	9.73751	21.1401	5.67064	10.9194	6.39854	10.417	4.28364	8.15268	4.42284	11.2256
Dhx38	5.22867	5.65234	4.46716	8.17117	9.90444	5.73273	5.74569	6.57675	7.34298	6.83493	5.74477	19.64	6.16543	5.88511	3.49421	9.81986	11.0325	8.21922	9.92936	5.29593	6.11612	10.2911	6.55331	6.3815	5.18248	5.0915	4.91283	13.8647	7.38576	8.62818
Vps72	12.8356	10.1948	11.2911	17.2813	10.7013	6.04568	6.83389	7.28532	4.57955	7.1203	7.79779	6.71672	9.01376	8.44271	7.13733	21.4698	8.38372	8.45671	6.54907	8.42991	9.67597	9.17994	7.74389	6.68495	5.58625	5.42949	6.96846	8.36039	5.94737	6.32828
Chd2	5.19689	6.7309	5.74414	8.66583	7.53731	19.0237	5.72634	5.87317	5.84574	5.35192	6.18668	3.90037	5.41641	4.99918	6.4353	21.812	7.93645	6.90786	10.2701	5.99144	7.04869	5.54641	6.26593	8.45503	6.10878	9.00003	7.24857	7.18769	8.70357	7.65533
Urm1	5.01988	5.65234	4.36859	8.82614	9.16384	11.418	24.5207	8.20347	5.90119	6.50277	7.36969	6.83363	8.06601	6.43882	7.41921	9.51733	6.39588	8.43089	8.74253	8.99135	9.28779	5.65424	7.66178	5.05279	9.42442	6.94177	4.81371	18.5642	7.06708	5.7474
Gabarapl1	7.72499	11.0406	10.7266	7.7223	12.9512	6.97031	6.74199	7.70947	7.59253	9.53428	8.83351	7.60945	21.7421	7.70971	6.18002	8.31216	7.95633	8.7355	9.26348	7.15202	6.8404	6.53098	3.99254	9.25502	6.7263	23.2346	10.778	14.3234	7.64846	11.0981
Lsm4	9.39072	8.34649	6.91805	5.08408	7.51856	6.99402	5.6151	9.31623	7.11655	15.3868	3.14858	8.07176	5.48774	5.95366	6.05237	8.93706	6.43066	6.73232	4.6337	5.75262	5.15042	3.48819	6.27619	6.51484	4.99248	4.62785	6.23153	4.24511	4.96547	20.0427
Pelo	12.5951	4.60512	8.97017	5.55126	9.42633	5.71376	20.3517	6.14263	6.21081	3.96716	6.26493	8.41716	8.64179	9.24954	7.33943	6.73503	7.74264	8.31731	6.72924	6.60315	5.33977	7.37021	5.54748	7.34241	6.5838	11.7473	4.74045	24.3758	7.6054	7.39086
Arl1	4.63863	7.4201	5.42153	25.2784	10.1248	4.09209	6.71781	6.56178	6.98254	6.93317	8.72763	7.50849	7.04694	7.62006	7.55217	6.03078	6.11758	6.36576	6.18871	5.26241	16.1755	5.98243	6.66108	8.5148	8.19887	7.89074	5.92987	11.1991	10.8612	7.89618
Rarres2	14.1655	8.73137	12.7652	11.1071	7.01233	6.26854	7.33688	6.91607	23.2258	8.86061	8.28573	6.72204	5.85971	7.61478	7.21179	7.71206	5.38208	6.62907	6.88592	5.31688	10.1967	10.1739	6.18895	7.78838	6.36054	6.63411	5.89539	8.0921	4.54773	25.6484
Ahsa1	4.63863	8.1451	5.86063	7.27344	5.77017	8.49714	4.54625	7.38512	6.66368	6.67119	16.0697	7.07275	7.55138	6.59175	7.96701	6.89374	6.12255	5.5965	4.37518	6.19674	6.34808	7.12172	7.34874	19.2916	6.13253	7.70874	7.06326	6.25298	4.65109	5.3082
Dpysl2	11.8326	12.0521	12.4874	11.1254	13.1856	9.31271	8.79264	7.98891	9.51492	6.5823	8.92557	8.36933	8.73351	9.10716	7.92446	9.6562	9.83484	7.8888	6.81933	5.99563	9.05584	6.94825	8.83183	8.17918	21.8557	14.7328	9.18785	14.1677	12.7474	24.1466
Eftud2	10.5118	7.12025	11.1477	7.93299	9.75913	7.61518	6.03104	7.64959	7.67108	7.67701	19.8259	8.50218	6.22658	5.49488	6.71718	10.0381	10.0783	8.82843	8.86788	5.54732	8.78127	7.58588	5.39866	10.1286	6.46504	8.51472	6.10656	17.6555	4.62956	9.01543
LOC102553715 /// Mfap4	10.1033	5.7687	8.06061	10.8002	10.0404	7.54406	10.9304	8.22343	6.0121	7.8735	7.89446	8.69879	9.30929	7.89427	9.8125	8.33696	5.06402	8.4154	19.2673	7.54167	8.62979	6.05276	8.0364	9.19985	8.04686	12.6919	10.3816	5.75967	21.9161	9.47353
Tspan7	6.93071	5.715	5.4753	22.4157	7.94512	8.31696	5.74085	9.02682	6.35868	8.5612	5.17858	7.86452	7.24566	6.33335	7.91382	20.5622	9.02976	8.69936	9.78443	9.10447	11.2476	10.6662	10.5253	5.91255	9.9992	5.80647	5.21018	5.77265	4.99562	9.10044
Ahnak	6.85355	8.02874	4.85698	7.7223	5.19362	5.67108	3.22107	7.58971	7.35223	5.46888	5.60667	8.44373	8.78956	8.80657	3.58462	5.69849	8.84092	5.69976	7.27761	5.40067	6.67945	5.61674	7.95943	8.70331	18.6636	8.03373	5.12399	4.62591	7.70875	15.679
LOC100363321 /// RGD1562289 /// Sdccag3	4.65224	5.54046	4.85698	5.02453	5.97642	5.59996	5.92947	6.52186	6.88549	7.26532	5.27525	25.6978	6.03295	8.05248	7.73832	7.61287	7.55379	4.89952	4.74729	5.9663	5.638	3.79763	6.33778	4.90107	5.75726	4.18586	13.9628	4.02874	5.86124	6.98
Tnpo2	7.05779	4.97657	18.7782	4.7314	16.0027	5.36287	6.87742	5.2145	5.88271	6.46067	6.31096	7.67322	7.03165	6.20679	3.72822	6.38291	7.47925	6.71167	6.79192	7.41598	7.36585	6.50754	10.6793	6.63437	8.31287	11.6866	11.0108	8.79312	3.20409	5.3932
Mrpl3	11.6783	25.6078	5.29607	13.0262	9.16384	7.96133	8.24613	9.45595	6.67754	6.43727	8.13382	9.48524	7.9743	9.22844	8.49353	9.66611	9.90938	8.25536	5.34658	9.1757	6.87827	24.6096	8.24681	9.39755	8.8829	11.6866	9.84289	11.29	8.66912	11.8962
Lsm2	4.68855	7.85421	9.45408	11.7025	27.0462	9.41703	7.23531	6.7514	7.19049	5.65601	8.09239	9.16641	6.83802	8.42689	8.40844	9.19496	9.11922	6.78912	18.0804	5.91183	10.4523	11.0647	9.30396	6.94701	9.02066	11.2923	9.39901	6.80688	11.5028	8.08981
Sptssa	9.8219	10.4186	27.0046	9.95288	6.40765	7.27378	8.64271	11.5467	9.28848	9.04306	8.02795	8.91666	8.91185	7.84154	8.40312	9.26935	9.97896	8.35345	7.46171	5.60179	5.9031	23.6766	8.56498	7.3608	8.41263	11.7429	10.6401	10.4721	11.9766	12.7841
Ypel5	10.7977	9.4161	21.6682	6.50854	10.1482	7.38758	7.92209	7.83422	7.33836	5.98816	7.49398	8.42779	8.10678	7.77826	8.04147	6.54161	8.83098	7.26409	6.18088	7.32799	7.20964	5.6308	6.58923	20.9606	7.78085	12.6919	11.0366	6.40444	10.7879	11.7451
Mest	11.1336	17.6328	8.74166	9.90708	8.6201	11.1478	11.6897	12.1006	7.56018	8.10741	8.9716	7.88577	8.36155	9.59231	8.42971	8.62461	18.641	8.17791	7.81031	8.30003	9.26886	8.12036	10.2636	7.07575	6.37004	5.9538	10.5496	12.2507	11.2918	12.6707
Dpt	4.0622	6.16253	6.82396	6.53144	6.43578	7.15998	7.22564	9.39607	5.26347	3.44319	8.65858	7.79012	9.53349	10.6206	9.13706	7.52856	14.9237	8.21405	5.85186	6.82102	5.50546	7.68902	9.85306	6.30794	9.76169	9.52435	16.1434	4.43551	8.51839	5.80407
Arl8a	7.13041	5.45095	5.40361	5.27187	5.07175	6.10732	5.45067	8.57273	18.7618	8.83722	7.80239	6.48291	7.39342	7.95756	6.00451	10.0926	8.95025	9.82486	5.21732	6.03334	7.56468	6.61068	9.48357	6.01369	9.00641	7.92974	6.06777	23.0257	9.20744	5.05318
Trim27	9.46334	9.70699	4.49405	7.24596	11.7231	7.02721	7.4723	8.19349	5.2912	7.67701	3.42937	7.0143	7.87749	20.7403	6.59485	11.2532	9.54163	6.80977	8.05316	9.54859	24.5544	7.58588	9.33475	9.8803	8.33663	10.5686	7.98981	6.89775	6.87328	7.71672
Letm1	5.37391	7.07102	7.67528	10.2918	6.32328	11.5271	23.4664	8.48291	12.9392	9.59977	7.21319	8.62971	6.24696	10.5521	7.73832	6.24404	10.8387	10.7593	8.70728	5.53894	15.9672	7.37021	5.52695	6.66656	6.99232	6.50412	7.89069	10.9438	8.527	8.23148
Actr1a	5.57815	7.01732	8.50419	5.41386	5.15144	13.291	24.9367	8.11865	9.60734	11.0407	8.58493	6.46697	6.2011	6.60229	6.38212	7.69222	6.25673	6.07665	14.9469	7.61709	5.82736	4.72125	8.90881	5.88496	10.061	5.9148	9.45934	8.07479	5.01715	7.08862
Guk1	9.75382	5.97457	11.8467	5.29935	5.40455	8.78639	11.6461	10.0248	22.5696	6.66651	7.12112	7.73167	6.38453	7.50932	6.2332	5.76793	6.41575	6.20055	4.54753	5.76519	6.90667	18.3552	6.64568	7.41597	6.6313	8.29372	6.78315	10.3466	6.98956	5.34126
Cwc15	21.187	6.8204	5.85167	6.68259	4.91238	11.3754	24.5207	5.56379	9.88923	8.19162	8.42843	9.24081	8.27493	7.83627	9.31257	7.11692	8.26942	7.24861	7.27369	7.41598	9.21205	7.78279	6.72779	6.71713	5.98052	14.0742	8.76982	11.766	5.12051	8.39205
Rangrf	4.85195	5.15111	4.97347	5.55584	6.00923	3.0584	5.54256	5.92806	3.76623	5.38935	5.86445	7.42347	6.33867	6.57065	5.57903	6.8987	6.04303	7.10921	13.5564	5.52218	5.50072	5.03537	6.20435	5.70565	5.65275	6.59078	13.2172	6.6987	4.89226	4.65176
Rpl34	5.4783	6.58769	7.2317	6.60472	5.67642	6.51511	6.01169	6.70649	6.23391	6.68054	6.78049	6.23847	8.48384	8.13158	7.79682	21.0681	5.82437	3.86696	6.12212	5.06549	5.70428	6.7654	7.95429	7.23666	6.34629	10.235	14.2989	11.4458	24.7585	5.46404
Rbp4	5.82778	7.58121	4.7136	7.44749	5.09987	10.9581	5.31525	8.67253	8.48903	23.017	5.89207	5.98341	6.29791	8.0683	8.33398	5.80264	4.95469	9.56671	6.70183	6.05848	7.45106	9.07211	7.54375	7.38379	6.41754	4.66251	6.30048	5.26203	5.33153	15.0604
RGD1309534	9.96261	7.45143	11.4121	8.43682	24.7447	5.38184	6.38893	5.88814	5.91967	5.62326	7.91287	7.60945	9.47744	8.75384	6.49912	7.5236	8.91049	5.94241	6.99168	5.12834	23.3189	5.76677	7.01004	6.36311	7.92811	4.51085	8.13202	9.46386	4.75445	8.67069
Pfdn6	12.8402	4.50666	10.6056	5.4734	5.07644	21.276	7.8979	5.93305	5.67475	9.25826	7.07969	6.84957	8.48384	6.8185	4.94082	7.41449	5.43177	7.03177	5.15465	7.05565	22.3911	7.60932	8.49827	5.97691	9.11566	7.0631	12.0924	3.73448	9.98693	10.4086
[truncated: 4,659 more rows]

## Sheet: local network _4 weeks
1	3437	6157
[truncated: 4,017 more rows]
[truncated: 16 more columns]

[truncated: 10 more sheets: degree matrix_8 weeks, local network _8 weeks, degree matrix_12 weeks, local network _12 weeks, degree matrix_16 weeks, local network _16 weeks, degree matrix_20 weeks, local network _20 weeks, degree matrix_reference, local network _reference]
