# Supplementary material for: Detecting the Critical States of Type 2 Diabetes Mellitus Based on Degree Matrix Network Entropy by Cross-Tissue Analysis
Source: Entropy (Basel). 2022 Sep 5;24(9):1249. doi: 10.3390/e24091249 (PMC9498060; doi:10.3390/e24091249)
Supplement: Supplementary file 1 [file entropy-24-01249-s001.zip › Supplementary Table S5.xlsx]

## Sheet: Name
The function enrichment of DNBs from GSE13268 (rat adipose tissue), GSE13269 (rat gastrocnemius muscle tissue) and GSE13270 (rat liver tissue)

## Sheet: GSE13268_8 weeks
#term ID	term description	matching proteins in your network (labels)	observed gene count	background gene count	strength	false discovery rate
GO:0033993	Response to lipid	Alas2,Aif1,Ran,Acads,Abcc5,Cxcl1,Gc,Col1a1,Cst3,Fkbp4,Serpina1,Nos3,S100a8,Prkcb,Col1a2,C1qb,Sparc,Cyba,Idh1,Rbp4,Cd4,Vim,Ccnb1,Bckdha,ND3,Eef2,Comt,Apoe,Plscr1,Scarb1,Spp1,Cebpa,Pros1,Lox,Mest,Birc5,Ccr5,Slpi	38	1199	0.58	3.37e-09
GO:0050896	Response to stimulus	Alas2,Psmb9,Cdk1,Aif1,Ran,Acads,Pfkl,Gna12,Pcolce,Por,Abcc5,Ugt2b15,Cxcl1,Alb,Nfia,Gc,Col3a1,Pttg1,Col1a1,C4bpa,Lum,Rhot1,Cst3,Vapb,Lyz2,Arhgdib,Aurkb,Fkbp4,Fabp1,Rap1b,Adrm1,Oxr1,Phip,Arpc4,Tnfaip1,Serpina1,Lmo2,Depdc1,Dpysl2,Mapk6,Nos3,Glud1,Mark3,Dap,RGD1309676,Laptm5,Cmbl,S100a8,Prkcb,Col1a2,C1qb,Fgl2,Sparc,Cyba,Pdcl3,Rnf111,Ect2,Mvd,Tgm2,Ifitm2,Idh1,Rbp4,Ccna2,Epn1,Hyal3,Rgs14,Cd4,Ttr,Gnai2,…	127	9725	0.2	1.33e-08
GO:0042493	Response to drug	Alas2,Psmb9,Cdk1,Gna12,Por,Ugt2b15,Col1a1,Cst3,Rap1b,Dpysl2,Nos3,Prkcb,Cyba,Mvd,Coq7,Ccnb1,Gnas,Atp8b1,Eef2,Comt,CYTB,Ece1,Cebpa,Lox,Birc5	25	616	0.69	1.3e-07
GO:0009725	Response to hormone	Aif1,Ran,Acads,Por,Abcc5,Cxcl1,Gc,Col1a1,Fkbp4,Rap1b,Phip,Lmo2,Nos3,Col1a2,C1qb,Sparc,Cyba,Idh1,Rbp4,Bckdha,Gnas,ND3,Comt,CYTB,Gpam,Apoe,Prlr,Spp1,Cebpa,Ccnd3,Lox,Birc5	32	1105	0.54	7.84e-07
GO:0048583	Regulation of response to stimulus	Rnf115,Aif1,Gna12,Por,Cxcl1,Col3a1,Col1a1,C4bpa,Arhgdib,Rap1b,Adrm1,Oxr1,Phip,Arpc4,Tnfaip1,Nos3,Mark3,S100a8,Furin,Prkcb,Ywhab,C1qb,Fgl2,Cyba,Rnf111,Tgm2,Rgs14,Cd4,Fam92a1,Letm1,Gnai2,Plg,Hpx,Cd74,Dvl1,Ctss,Nfam1,Pld4,Fgg,Gnas,Slc24a6,Fcer1g,Smad3,Hbb,Agrn,Lcp2,Apoe,Atp6ap1,Plscr1,Grina,Prlr,Ptpn6,Cdk16,Spp1,Aaed1,Ece1,Igg-2a,Cebpa,Rgs7,Ccnd3,Pros1,Pea15,Ube2n,Lox,Birc5,Ccr5	66	4193	0.28	2.51e-05
GO:0048545	Response to steroid hormone	Aif1,Ran,Acads,Cxcl1,Gc,Col1a1,Fkbp4,Nos3,C1qb,Sparc,Cyba,Idh1,Bckdha,ND3,Spp1,Cebpa,Lox,Birc5	18	476	0.66	6.1e-05
GO:0002376	Immune system process	Alas2,Psmb8,Psmb9,Aif1,Cxcl1,C4bpa,Adrm1,Arpc4,Tnfaip1,Lmo2,S100a8,Prkcb,C1qb,Fgl2,Cyba,Ifitm2,Cd4,Plg,Vim,Cd74,Coro1a,Ctss,Nfam1,Pld4,Fcer1g,Smad3,Eef2,Ifitm1,ENSRNOP00000047118,Hbb,Gpam,Lcp2,Plscr1,Ptpn6,Spp1,Igg-2a,Cebpa,Ccnd3,Ube2n,Apoa4,Ccr5,Slpi	42	2465	0.31	0.00095
GO:0031323	Regulation of cellular metabolic process	Ring1,Cdk1,Aif1,Gna12,Pcolce,Por,Cxcl1,Nfia,Pttg1,Col1a1,Lum,Dazap2,Cst3,Aurkb,Eif1ax,Fabp1,Ambp,Rap1b,Adrm1,Oxr1,Phip,Tnfaip1,Serpina1,Lmo2,Depdc1,Nos3,Dap,Ankrd13c,S100a8,Furin,Prkcb,Ywhab,Rbl2,Cyba,Pdcl3,Rnf111,Ect2,Idh1,Ctdsp1,Ccna2,Rgs14,Cd4,Mlf2,Gnai2,Coq7,Vim,Hpx,Ccnb1,Cd74,RGD1303130,Dvl1,Nfam1,Fgg,Gnas,Smad3,Atp8b1,Eef2,Comt,ENSRNOP00000047118,Hbb,Gpam,Agrn,Lcp2,Apoe,Ap1ar,Atp6ap1,Plscr1…	82	6753	0.17	0.0044
GO:0071704	Organic substance metabolic process	Rnf115,Alas2,Psmb8,Psmb9,Ring1,Cdk1,Aif1,Ran,Acads,Pfkl,Plbd2,Pcolce,Por,Nfia,Gc,Col3a1,Pttg1,Aurkb,Eif1ax,Fkbp4,Ambp,Ubl7,Adrm1,Tnfaip1,Lmo2,Hsd17b12,Mapk6,Nos3,Dpagt1,Glud1,Mark3,Mrps25,S100a8,Furin,Prkcb,Fgl2,Mrpl3,Rnf111,Mvd,Tgm2,Tinagl1,Psat1,Retsat,Idh1,Ctdsp1,Cdca3,Rbp4,Ccna2,Hyal3,Tkt,Cd4,Ttr,Coq7,Plg,Hpx,Ahcyl2,Ccnb1,Cd74,Dvl1,Napsa,Ubl5,Bckdha,Mrpl16,Ctss,Pld4,Fgg,Gnas,Rpl23a,Fcer1g,Atp…	99	8697	0.14	0.0049
GO:0008202	Steroid metabolic process	Gc,Hsd17b12,Mvd,Atp8b1,Comt,Apoe,Scarb1,Spp1,Cebpa,Apoa4	10	248	0.69	0.006
GO:0015914	Phospholipid transport	Fabp1,Atp8b1,Apoe,Plscr1,Scarb1,Apoa4	6	92	0.9	0.0139
GO:0006955	Immune response	Aif1,Cxcl1,C4bpa,Tnfaip1,S100a8,Prkcb,C1qb,Fgl2,Cyba,Ifitm2,Cd4,Vim,Cd74,Coro1a,Ctss,Pld4,Fcer1g,Smad3,Ifitm1,ENSRNOP00000047118,Plscr1,Ptpn6,Igg-2a,Apoa4,Ccr5,Slpi	26	1466	0.33	0.0175
GO:0046889	Positive regulation of lipid biosynthetic process	Por,Cd74,Gpam,Apoe,Scarb1,Apoa4	6	103	0.85	0.0211
GO:0006629	Lipid metabolic process	Acads,Plbd2,Por,Gc,Hsd17b12,Dpagt1,Mvd,Retsat,Rbp4,Ttr,Cd74,Atp8b1,Cbr4,Comt,ENSRNOP00000047118,Gpam,Apoe,Plscr1,Scarb1,Spp1,Cebpa,Apoa4	22	1176	0.36	0.0238
GO:0050796	Regulation of insulin secretion	Pfkl,Glud1,Rbp4,Slc24a6,Cdk16,Birc5,Glul,Kcnb1	8	201	0.68	0.0238
GO:0045834	Positive regulation of lipid metabolic process	Por,Fabp1,Cd74,Gpam,Apoe,Scarb1,Apoa4	7	177	0.68	0.0428
GO:0010033	Response to organic substance	Alas2,Psmb9,Cdk1,Aif1,Ran,Acads,Pfkl,Gna12,Pcolce,Por,Abcc5,Cxcl1,Alb,Nfia,Gc,Col3a1,Col1a1,Lum,Cst3,Vapb,Fkbp4,Rap1b,Phip,Serpina1,Lmo2,Dpysl2,Nos3,Laptm5,S100a8,Prkcb,Col1a2,C1qb,Sparc,Cyba,Ifitm2,Idh1,Rbp4,Hyal3,Cd4,Gnai2,Epg5,Vim,Ccnb1,Cd74,Rab14,Coro1a,Bckdha,Dync1li2,Fgg,Gnas,Fcer1g,Smad3,ND3,Eef2,Ifitm1,Comt,CYTB,Gpam,Apoe,Plscr1,Prlr,Anxa7,Scarb1,Spp1,Cebpa,Rgs7,Ccnd3,Pros1,Pea15,Lox,Mest…	77	3512	0.42	7.29e-13
GO:0014070	Response to organic cyclic compound	Alas2,Psmb9,Cdk1,Aif1,Ran,Acads,Gna12,Cxcl1,Nfia,Gc,Col1a1,Lum,Cst3,Fkbp4,Rap1b,Serpina1,Dpysl2,Nos3,Prkcb,Col1a2,C1qb,Sparc,Cyba,Idh1,Cd4,Epg5,Vim,Ccnb1,Bckdha,Gnas,ND3,Eef2,Comt,CYTB,Apoe,Anxa7,Spp1,Cebpa,Pea15,Lox,Apoa4,Birc5,Ccr5	43	1313	0.6	6.7e-11
GO:0042221	Response to chemical	Alas2,Psmb9,Cdk1,Aif1,Ran,Acads,Pfkl,Gna12,Pcolce,Por,Abcc5,Ugt2b15,Cxcl1,Alb,Nfia,Gc,Col3a1,Col1a1,Lum,Cst3,Vapb,Fkbp4,Fabp1,Rap1b,Oxr1,Phip,Serpina1,Lmo2,Dpysl2,Nos3,Glud1,RGD1309676,Laptm5,Cmbl,S100a8,Prkcb,Col1a2,C1qb,Sparc,Cyba,Ect2,Mvd,Ifitm2,Idh1,Rbp4,Hyal3,Cd4,Gnai2,Epg5,Coq7,Vim,Ccnb1,Cd74,Rab14,Dvl1,Coro1a,Bckdha,Nucb1,Dync1li2,Fgg,Gnas,Fcer1g,Smad3,Atp8b1,ND3,Eef2,Ifitm1,Comt,ENSRNOP00…	95	5773	0.3	7.27e-10
GO:1901700	Response to oxygen-containing compound	Alas2,Cdk1,Aif1,Pfkl,Gna12,Por,Abcc5,Cxcl1,Gc,Col3a1,Col1a1,Cst3,Fabp1,Rap1b,Oxr1,Phip,Serpina1,Dpysl2,Nos3,S100a8,Prkcb,Col1a2,Sparc,Cyba,Ect2,Rbp4,Cd4,Gnai2,Vim,Ccnb1,Bckdha,Gnas,Eef2,Comt,CYTB,Hbb,Gpam,Apoe,Plscr1,Scarb1,Spp1,Cebpa,Rgs7,Ccnd3,Pros1,Mest,Apoa4,Birc5,Glul,Kcnb1,Ccr5,Slpi	52	2048	0.49	7.27e-10
GO:0070887	Cellular response to chemical stimulus	Psmb9,Cdk1,Aif1,Ran,Gna12,Pcolce,Por,Cxcl1,Col3a1,Col1a1,Cst3,Vapb,Fkbp4,Fabp1,Rap1b,Oxr1,Phip,Lmo2,Nos3,RGD1309676,Laptm5,Cmbl,S100a8,Prkcb,Col1a2,Sparc,Cyba,Ect2,Ifitm2,Hyal3,Cd4,Gnai2,Epg5,Coq7,Vim,Ccnb1,Cd74,Rab14,Coro1a,Dync1li2,Fgg,Gnas,Fcer1g,Smad3,ND3,Eef2,Ifitm1,Hbb,Gpam,Apoe,Atp6ap1,Plscr1,Prlr,Scarb1,Spp1,Aaed1,Cebpa,Lox,Apoa4,Birc5,Kcnb1,Ccr5	62	3000	0.4	7.42e-09
GO:0009605	Response to external stimulus	Psmb9,Aif1,Acads,Por,Abcc5,Cxcl1,Alb,Gc,Col3a1,Col1a1,C4bpa,Cst3,Lyz2,Serpina1,Dpysl2,Nos3,Dap,S100a8,Prkcb,C1qb,Sparc,Cyba,Ifitm2,Rbp4,Hyal3,Cd4,Vim,Ccnb1,Rab14,Dvl1,Coro1a,Bckdha,Pld4,Fcer1g,Eef2,Ifitm1,Comt,ENSRNOP00000047118,CYTB,Gpam,Agrn,Apoe,Plscr1,Ccdc80,Prlr,Ptpn6,Scarb1,Spp1,Ece1,Igg-2a,Cebpa,Pros1,Lox,Apoa4,Glul,Kcnb1,Ccr5,Slpi	58	2753	0.41	1.75e-08
GO:0006950	Response to stress	Alas2,Cdk1,Aif1,Acads,Cxcl1,Alb,Col3a1,Pttg1,Col1a1,C4bpa,Cst3,Vapb,Lyz2,Fabp1,Oxr1,Tnfaip1,Serpina1,Nos3,Dap,S100a8,Prkcb,C1qb,Sparc,Cyba,Pdcl3,Rnf111,Ect2,Ifitm2,Idh1,Hyal3,Rgs14,Cd4,Coq7,Plg,Vim,Ccnb1,Cd74,Rab14,Coro1a,Pld4,Fgg,Gnas,Fcer1g,Smad3,ND3,Eef2,Ifitm1,Comt,CYTB,Hbb,Gpam,Apoe,Plscr1,Anxa7,Ptpn6,Spp1,Ece1,Igg-2a,Cebpa,Rgs7,Pros1,Pea15,Ube2n,Lox,Apoa4,Glul,Ccr5,Slpi	68	3683	0.35	4.6e-08
GO:0032879	Regulation of localization	Cdk1,Aif1,Ran,Pfkl,Gna12,Cxcl1,Col3a1,Col1a1,C4bpa,Rhot1,Arhgdib,Aurkb,Rap1b,Dpysl2,Nos3,Glud1,S100a8,Furin,Prkcb,Sparc,Cyba,Ect2,Rbp4,Hyal3,Cd4,Letm1,Gnai2,Plg,Vim,Cd74,Rab14,Dvl1,Coro1a,Nucb1,Fxyd5,Ctss,Fgg,Gnas,Slc24a6,Fcer1g,Smad3,Comt,ENSRNOP00000047118,Gpam,Agrn,Apoe,Ap1ar,Atp6ap1,Ptpn6,Cdk16,Scarb1,Spp1,Rgs7,Pros1,Pea15,Mest,Apoa4,Birc5,Glul,Kcnb1,Ccr5	61	3105	0.38	5.9e-08
GO:0065008	Regulation of biological quality	Alas2,Pfkl,Gna12,Por,Cxcl1,Alb,Gc,Rhot1,Vapb,Aurkb,Rap1b,Phip,Arpc4,Lmo2,Hsd17b12,Dpysl2,Nos3,Glud1,Ankrd13c,Furin,Prkcb,Col1a2,Ywhab,Sparc,Cyba,Pdcl3,Tgm2,Retsat,Rbp4,Rgs14,Cd4,Ttr,Letm1,Gnai2,Plg,Vim,Hpx,Cd74,Rab14,Dvl1,Coro1a,Napsa,Ctss,Fgg,Gnas,Slc24a6,Fcer1g,Smad3,Atp8b1,Comt,Hbb,Gpam,Agrn,Apoe,Ap1ar,Atp6ap1,Plscr1,Grina,Prlr,Anxa7,Ptpn6,Cdk16,Scarb1,Spp1,Papd5,Ece1,Cebpa,Rgs7,Pros1,Lox,Mest…	76	4532	0.31	1.3e-07
GO:0048522	Positive regulation of cellular process	Cdk1,Aif1,Ran,Pcolce,Por,Cxcl1,Nfia,Col3a1,Col1a1,Pfdn2,Lum,Dazap2,Cst3,Surf4,Aurkb,Fabp1,Rap1b,Adrm1,Phip,Arpc4,Tnfaip1,Lmo2,Hsd17b12,Dpysl2,Mapk6,Nos3,Glud1,Dap,S100a8,Furin,Prkcb,Sparc,Cyba,Pdcl3,Rnf111,Ect2,Mvd,Tgm2,Rbp4,Ccna2,Epn1,Hyal3,Rgs14,Cd4,Fam92a1,Gnai2,Coq7,Plg,Cd53,Vim,Hpx,Ccnb1,Cd74,RGD1303130,Dvl1,Coro1a,Ctss,Nfam1,Fgg,Gnas,Fcer1g,Tspan31,Smad3,Eef2,Comt,ENSRNOP00000047118,Hbb,Gpa…	92	6252	0.25	4.13e-07
GO:0048518	Positive regulation of biological process	Cdk1,Aif1,Ran,Pcolce,Por,Cxcl1,Alb,Nfia,Col3a1,Col1a1,Pfdn2,C4bpa,Lum,Dazap2,Cst3,Vapb,Surf4,Aurkb,Fabp1,Rap1b,Adrm1,Phip,Arpc4,Tnfaip1,Lmo2,Hsd17b12,Dpysl2,Mapk6,Nos3,Glud1,Dap,S100a8,Furin,Prkcb,C1qb,Sparc,Cyba,Pdcl3,Rnf111,Ect2,Mvd,Tgm2,Rbp4,Ccna2,Epn1,Hyal3,Rgs14,Cd4,Fam92a1,Gnai2,Coq7,Plg,Cd53,Vim,Hpx,Ccnb1,Cd74,RGD1303130,Dvl1,Coro1a,Ctss,Nfam1,Fgg,Gnas,Fcer1g,Tspan31,Smad3,Eef2,Comt,ENSRNO…	97	6791	0.24	4.21e-07
GO:0009719	Response to endogenous stimulus	Aif1,Ran,Acads,Gna12,Por,Abcc5,Cxcl1,Gc,Col3a1,Col1a1,Fkbp4,Rap1b,Phip,Lmo2,Nos3,Col1a2,C1qb,Sparc,Cyba,Idh1,Rbp4,Vim,Rab14,Coro1a,Bckdha,Dync1li2,Gnas,Fcer1g,Smad3,ND3,Eef2,Comt,CYTB,Gpam,Apoe,Prlr,Spp1,Cebpa,Ccnd3,Lox,Birc5	41	1761	0.45	1.31e-06
GO:0008152	Metabolic process	Rnf115,Alas2,Psmb8,Psmb9,Ring1,Cdk1,Aif1,Ran,Acads,Ndufv3,Pfkl,Plbd2,Pcolce,Por,Ugt2b15,Nfia,Gc,Col3a1,Pttg1,Col1a1,Lyz2,Aurkb,Eif1ax,Fkbp4,Ambp,Ubl7,Adrm1,Oxr1,Tnfaip1,Lmo2,Hsd17b12,Mapk6,Nos3,Dpagt1,Glud1,Mark3,Dap,RGD1309676,Mrps25,Cmbl,S100a8,Furin,Prkcb,Col1a2,Fgl2,Mrpl3,Cyba,Rnf111,Mvd,Tgm2,Tinagl1,Psat1,Retsat,Idh1,Ctdsp1,Cdca3,Rbp4,Ccna2,Lyrm5,Hyal3,Tkt,Cd4,Ttr,Epg5,Coq7,Plg,Hpx,Ahcyl2,Cc…	118	9342	0.18	1.44e-06
GO:0051049	Regulation of transport	Cdk1,Ran,Pfkl,Cxcl1,C4bpa,Rhot1,Rap1b,Dpysl2,Nos3,Glud1,S100a8,Prkcb,Cyba,Ect2,Rbp4,Hyal3,Cd4,Gnai2,Cd74,Dvl1,Coro1a,Nucb1,Fxyd5,Ctss,Fgg,Gnas,Slc24a6,Fcer1g,Comt,Gpam,Agrn,Apoe,Atp6ap1,Ptpn6,Cdk16,Scarb1,Spp1,Rgs7,Pros1,Pea15,Apoa4,Birc5,Glul,Kcnb1	44	2063	0.41	3.58e-06
GO:0071310	Cellular response to organic substance	Psmb9,Aif1,Ran,Gna12,Pcolce,Por,Cxcl1,Col3a1,Col1a1,Vapb,Fkbp4,Rap1b,Phip,Lmo2,Nos3,Laptm5,Prkcb,Col1a2,Sparc,Cyba,Ifitm2,Hyal3,Cd4,Epg5,Vim,Ccnb1,Cd74,Rab14,Coro1a,Dync1li2,Fgg,Gnas,Fcer1g,Smad3,ND3,Eef2,Ifitm1,Gpam,Apoe,Plscr1,Prlr,Scarb1,Spp1,Cebpa,Lox,Birc5,Kcnb1,Ccr5	48	2385	0.39	3.58e-06
GO:0051239	Regulation of multicellular organismal process	Cdk1,Aif1,Por,Cxcl1,Alb,Col3a1,Col1a1,Lum,Cst3,Arhgdib,Fkbp4,Adrm1,Lmo2,Dpysl2,Mapk6,Nos3,RGD1309676,Furin,Prkcb,Fgl2,Sparc,Cyba,Pdcl3,Ect2,Ctdsp1,Rbp4,Epn1,Hyal3,Rgs14,Cd4,Gnai2,Plg,Vim,Ccnb1,Cd74,Rab14,Dvl1,Ctss,Nfam1,Pld4,Fgg,Gnas,Fcer1g,Smad3,Comt,ENSRNOP00000047118,Gpam,Agrn,Apoe,Atp6ap1,Prlr,Ptpn6,Spp1,Ece1,Cebpa,Pros1,Lox,Apoa4,Glul,Ccr5	60	3488	0.32	7.82e-06
GO:0009991	Response to extracellular stimulus	Aif1,Acads,Por,Alb,Gc,Col1a1,Cst3,Nos3,Dap,Prkcb,Sparc,Cyba,Cd4,Vim,Bckdha,Eef2,Comt,CYTB,Gpam,Apoe,Spp1,Cebpa,Glul,Kcnb1	24	729	0.6	8.7e-06
GO:0034097	Response to cytokine	Psmb9,Aif1,Pcolce,Cxcl1,Col3a1,Col1a1,Serpina1,Nos3,Laptm5,Sparc,Cyba,Ifitm2,Hyal3,Cd4,Vim,Cd74,Coro1a,Fgg,Fcer1g,Ifitm1,Apoe,Plscr1,Prlr,Spp1,Cebpa,Lox,Birc5,Ccr5	28	986	0.54	1.04e-05
GO:0044419	Interspecies interaction between organisms	Psmb9,Aif1,Abcc5,Cxcl1,C4bpa,Vapb,Lyz2,Serpina1,Nos3,S100a8,Furin,C1qb,Sparc,Cyba,Pdcl3,Ifitm2,Hyal3,Cd4,Plg,Vim,Rab14,Coro1a,Pld4,Fcer1g,Ifitm1,Comt,Gpam,Apoe,Plscr1,Ccdc80,Prlr,Ptpn6,Scarb1,Igg-2a,Pros1,Apoa4,Ccr5,Slpi	38	1700	0.43	1.16e-05
GO:0051046	Regulation of secretion	Pfkl,Rhot1,Rap1b,Dpysl2,Glud1,S100a8,Prkcb,Cyba,Rbp4,Hyal3,Gnai2,Cd74,Dvl1,Fgg,Gnas,Slc24a6,Fcer1g,Comt,Gpam,Apoe,Atp6ap1,Cdk16,Spp1,Birc5,Glul,Kcnb1	26	866	0.56	1.16e-05
GO:0031667	Response to nutrient levels	Acads,Por,Alb,Gc,Col1a1,Cst3,Nos3,Dap,Prkcb,Sparc,Cyba,Cd4,Vim,Bckdha,Eef2,Comt,CYTB,Gpam,Apoe,Spp1,Cebpa,Glul,Kcnb1	23	693	0.6	1.3e-05
GO:0010035	Response to inorganic substance	Alas2,Cdk1,Alb,Col1a1,Cst3,Fabp1,Serpina1,Nos3,Glud1,S100a8,Sparc,Ect2,Vim,Ccnb1,Fgg,Eef2,CYTB,Hbb,Gpam,Apoe,Anxa7,Ece1,Cebpa,Apoa4	24	775	0.57	2.16e-05
GO:0071345	Cellular response to cytokine stimulus	Psmb9,Aif1,Pcolce,Cxcl1,Col1a1,Nos3,Laptm5,Cyba,Ifitm2,Hyal3,Cd4,Vim,Cd74,Coro1a,Fgg,Fcer1g,Ifitm1,Apoe,Plscr1,Prlr,Spp1,Cebpa,Lox,Birc5,Ccr5	25	850	0.55	2.68e-05
GO:0048519	Negative regulation of biological process	Rnf115,Ring1,Cdk1,Aif1,Pfkl,Por,Alb,Nfia,Col3a1,Pttg1,Col1a1,C4bpa,Cst3,Vapb,Arhgdib,Aurkb,Fkbp4,Fabp1,Ambp,Rap1b,Oxr1,Phip,Tnfaip1,Serpina1,Lmo2,Depdc1,Nos3,Mark3,Dap,Furin,Prkcb,Ywhab,Fgl2,Rbl2,Sparc,Cyba,Pdcl3,Ifitm2,Ctdsp1,Rbp4,Epn1,Hyal3,Rgs14,Letm1,Gnai2,Coq7,Plg,Vim,Ccnb1,Cd74,Dvl1,Coro1a,Fgg,Gnas,Slc24a6,Fcer1g,Smad3,Atp8b1,Ifitm1,Comt,Gpam,Agrn,Apoe,Ap1ar,Plscr1,Grina,Prlr,Anxa7,Ptpn6,Sp…	81	5794	0.23	5.72e-05
GO:0050793	Regulation of developmental process	Cdk1,Gna12,Por,Cxcl1,Col3a1,Col1a1,Cst3,Arhgdib,Fkbp4,Adrm1,Phip,Lmo2,Dpysl2,Mapk6,Nos3,RGD1309676,Prkcb,Fgl2,Sparc,Pdcl3,Ect2,Ctdsp1,Rbp4,Epn1,Hyal3,Rgs14,Cd4,Cd53,Vim,Ccnb1,Cd74,Rab14,Dvl1,Coro1a,Nfam1,Gnas,Smad3,ENSRNOP00000047118,Gpam,Agrn,Apoe,Ap1ar,Atp6ap1,Prlr,Anxa7,Ptpn6,Spp1,Cebpa,Lox,Glul,Ccr5	51	2912	0.33	5.81e-05
GO:1901698	Response to nitrogen compound	Psmb9,Cdk1,Aif1,Gna12,Por,Abcc5,Cxcl1,Col3a1,Col1a1,Rap1b,Phip,Dpysl2,Nos3,Col1a2,Sparc,Cyba,Rbp4,Gnai2,Epg5,Vim,Bckdha,Gnas,Fcer1g,Eef2,CYTB,Gpam,Apoe,Cebpa,Rgs7,Ccnd3,Pea15,Birc5	32	1410	0.44	9.82e-05
GO:0051707	Response to other organism	Psmb9,Aif1,Abcc5,Cxcl1,C4bpa,Lyz2,Serpina1,Nos3,S100a8,C1qb,Sparc,Cyba,Ifitm2,Hyal3,Cd4,Vim,Rab14,Coro1a,Pld4,Fcer1g,Ifitm1,Comt,Gpam,Plscr1,Ccdc80,Prlr,Ptpn6,Scarb1,Igg-2a,Pros1,Apoa4,Ccr5,Slpi	33	1493	0.43	0.00011
GO:0051246	Regulation of protein metabolic process	Psmb8,Psmb9,Aif1,Gna12,Pcolce,Por,Pttg1,C4bpa,Dazap2,Cst3,Eif1ax,Fabp1,Ambp,Rap1b,Adrm1,Oxr1,Phip,Serpina1,Dap,S100a8,Furin,Ywhab,Pdcl3,Rnf111,Ect2,Ctdsp1,Ccna2,Rgs14,Cd4,Gnai2,Vim,Hpx,Ccnb1,Cd74,Dvl1,Fgg,Gnas,Smad3,Eef2,ENSRNOP00000047118,Hbb,Agrn,Lcp2,Apoe,Atp6ap1,Prlr,Ptpn6,Aaed1,Ece1,Ccnd3,Ube2n,Lox,Birc5,Slpi	54	3278	0.3	0.00013
GO:1901701	Cellular response to oxygen-containing compound	Cdk1,Aif1,Gna12,Por,Cxcl1,Col3a1,Col1a1,Cst3,Fabp1,Rap1b,Oxr1,Phip,Nos3,Prkcb,Col1a2,Cyba,Ect2,Gnai2,Vim,Ccnb1,Gnas,Gpam,Apoe,Plscr1,Scarb1,Spp1,Apoa4,Birc5,Kcnb1,Ccr5	30	1291	0.45	0.00014
GO:0010038	Response to metal ion	Alas2,Cdk1,Alb,Serpina1,Nos3,Glud1,S100a8,Sparc,Ect2,Vim,Ccnb1,Fgg,CYTB,Gpam,Apoe,Anxa7,Ece1,Cebpa	18	516	0.63	0.00016
GO:0010243	Response to organonitrogen compound	Psmb9,Cdk1,Aif1,Gna12,Por,Abcc5,Cxcl1,Col3a1,Col1a1,Rap1b,Phip,Dpysl2,Nos3,Col1a2,Sparc,Cyba,Rbp4,Vim,Bckdha,Gnas,Fcer1g,Eef2,CYTB,Gpam,Apoe,Cebpa,Rgs7,Ccnd3,Pea15,Birc5	30	1313	0.44	0.00018
GO:0050790	Regulation of catalytic activity	Psmb8,Psmb9,Ring1,Pcolce,Por,Pttg1,Dazap2,Cst3,Arhgdib,Aurkb,Fabp1,Ambp,Adrm1,Serpina1,Depdc1,Nos3,Dap,S100a8,Furin,Ywhab,Rbl2,Cyba,Ect2,Ccna2,Rgs14,Cd4,Gnai2,Ccnb1,Cd74,Dvl1,Gnas,Smad3,Agrn,Lcp2,Apoe,Plscr1,Prlr,Ptpn6,Scarb1,Rgs7,Ccnd3,Ube2n,Apoa4,Birc5,Slpi	45	2518	0.34	0.00018
GO:0010817	Regulation of hormone levels	Pfkl,Por,Hsd17b12,Glud1,Furin,Retsat,Rbp4,Ttr,Fgg,Gnas,Slc24a6,Comt,Cdk16,Scarb1,Spp1,Ece1,Birc5,Glul,Kcnb1	19	584	0.6	0.00019
GO:1903530	Regulation of secretion by cell	Pfkl,Rhot1,Rap1b,Dpysl2,Glud1,Prkcb,Rbp4,Hyal3,Gnai2,Dvl1,Fgg,Gnas,Slc24a6,Fcer1g,Gpam,Apoe,Atp6ap1,Cdk16,Spp1,Birc5,Glul,Kcnb1	22	786	0.53	0.00027
GO:2000026	Regulation of multicellular organismal development	Cdk1,Por,Cxcl1,Col3a1,Col1a1,Arhgdib,Fkbp4,Adrm1,Lmo2,Dpysl2,Mapk6,Nos3,RGD1309676,Prkcb,Fgl2,Sparc,Pdcl3,Ect2,Ctdsp1,Rbp4,Epn1,Hyal3,Rgs14,Cd4,Vim,Ccnb1,Cd74,Rab14,Dvl1,Nfam1,Gnas,Smad3,ENSRNOP00000047118,Agrn,Apoe,Atp6ap1,Prlr,Ptpn6,Spp1,Lox,Glul,Ccr5	42	2319	0.34	0.00031
GO:0032268	Regulation of cellular protein metabolic process	Aif1,Gna12,Pcolce,Por,Pttg1,Dazap2,Cst3,Eif1ax,Fabp1,Ambp,Rap1b,Adrm1,Oxr1,Phip,Serpina1,Dap,S100a8,Furin,Ywhab,Pdcl3,Rnf111,Ect2,Ctdsp1,Ccna2,Rgs14,Cd4,Gnai2,Vim,Hpx,Ccnb1,Cd74,Dvl1,Fgg,Gnas,Smad3,Eef2,ENSRNOP00000047118,Hbb,Agrn,Lcp2,Apoe,Atp6ap1,Prlr,Ptpn6,Aaed1,Ece1,Ccnd3,Ube2n,Lox,Birc5,Slpi	51	3128	0.3	0.00035
GO:0048584	Positive regulation of response to stimulus	Aif1,Por,Cxcl1,Col3a1,Col1a1,C4bpa,Rap1b,Adrm1,Phip,Arpc4,S100a8,Furin,Prkcb,C1qb,Cyba,Rnf111,Tgm2,Cd4,Fam92a1,Gnai2,Plg,Hpx,Cd74,Dvl1,Ctss,Nfam1,Fgg,Gnas,Fcer1g,Smad3,Lcp2,Apoe,Atp6ap1,Plscr1,Prlr,Ptpn6,Aaed1,Ece1,Igg-2a,Cebpa,Pea15,Ube2n,Ccr5	43	2438	0.33	0.00041
GO:0050789	Regulation of biological process	Rnf115,Psmb8,Psmb9,Ring1,Cdk1,Aif1,Ran,Pfkl,Gna12,Pcolce,Por,Cxcl1,Alb,Nfia,Col3a1,Pttg1,Col1a1,Pfdn2,C4bpa,Lum,Rhot1,Dazap2,Cst3,Vapb,Surf4,Arhgdib,Aurkb,Eif1ax,Fkbp4,Fabp1,Ambp,Rap1b,Adrm1,Oxr1,Phip,Arpc4,Tnfaip1,Serpina1,Lmo2,Depdc1,Hsd17b12,Dpysl2,Mapk6,Nos3,Glud1,Mark3,Dap,RGD1309676,Ankrd13c,S100a8,Furin,Prkcb,Col1a2,Ywhab,C1qb,Fgl2,Rbl2,Sparc,Cyba,Pdcl3,Rnf111,Ect2,Mvd,Tgm2,Ifitm2,Idh1,Ctd…	143	13540	0.11	0.00041
GO:0051179	Localization	Alas2,Cdk1,Aif1,Ran,Abcc5,Nuf2,Cxcl1,Alb,Gc,Col1a1,Rhot1,Vapb,Aurkb,Fkbp4,Fabp1,Nup210,Phip,Arpc4,Slco2a1,Tnfaip1,Dpysl2,Nos3,Ankrd13c,S100a8,Furin,Prkcb,Ywhab,Ect2,Tgm2,Rbp4,Epn1,Rgs14,Cd4,Ttr,Letm1,Epg5,Plg,Hpx,Ccnb1,Cd74,Rab14,Dvl1,Coro1a,Selenbp1,Fxyd5,Dync1li2,Pld4,Fgg,Slc24a6,LOC685707,Fcer1g,Atp8b1,Tst,ENSRNOP00000047118,CYTB,Hbb,Agrn,Lcp2,Apoe,Ap1ar,Atp6ap1,Plscr1,Grina,Prlr,Cdk16,Scarb1,…	75	5492	0.22	0.00041
GO:0098869	Cellular oxidant detoxification	Fabp1,Nos3,RGD1309676,S100a8,Hbb,Apoe,Aaed1,Apoa4	8	91	1.03	0.00043
GO:0023051	Regulation of signaling	Rnf115,Pfkl,Gna12,Por,Col3a1,Col1a1,Rhot1,Arhgdib,Rap1b,Adrm1,Phip,Tnfaip1,Glud1,Mark3,S100a8,Furin,Prkcb,Ywhab,Cyba,Rnf111,Tgm2,Rbp4,Rgs14,Cd4,Fam92a1,Gnai2,Plg,Hpx,Cd74,Dvl1,Nfam1,Fgg,Gnas,Slc24a6,Smad3,Gpam,Agrn,Apoe,Ap1ar,Atp6ap1,Plscr1,Grina,Prlr,Ptpn6,Cdk16,Spp1,Aaed1,Ece1,Rgs7,Ccnd3,Pea15,Ube2n,Lox,Birc5,Glul,Kcnb1	56	3633	0.27	0.00045
GO:0044237	Cellular metabolic process	Rnf115,Alas2,Psmb8,Psmb9,Ring1,Cdk1,Ran,Acads,Ndufv3,Pfkl,Por,Ugt2b15,Nfia,Col3a1,Pttg1,Aurkb,Eif1ax,Fkbp4,Ambp,Ubl7,Adrm1,Tnfaip1,Lmo2,Hsd17b12,Mapk6,Nos3,Dpagt1,Glud1,Mark3,Dap,Mrps25,Cmbl,S100a8,Furin,Prkcb,Mrpl3,Cyba,Rnf111,Mvd,Tgm2,Psat1,Retsat,Idh1,Ctdsp1,Cdca3,Rbp4,Ccna2,Lyrm5,Hyal3,Tkt,Ttr,Epg5,Coq7,Plg,Hpx,Ahcyl2,Ccnb1,Cd74,Dvl1,Ubl5,Bckdha,Mrpl16,Ctss,Pld4,Gnas,Rpl23a,Fcer1g,Atp8b1,Cbr4…	100	8245	0.17	0.00045
GO:0010647	Positive regulation of cell communication	Por,Col3a1,Col1a1,Rap1b,Adrm1,Phip,Glud1,S100a8,Furin,Prkcb,Cyba,Rnf111,Tgm2,Rbp4,Rgs14,Cd4,Fam92a1,Gnai2,Hpx,Cd74,Dvl1,Nfam1,Fgg,Gnas,Smad3,Apoe,Atp6ap1,Plscr1,Prlr,Ptpn6,Spp1,Aaed1,Ece1,Pea15,Ube2n,Glul,Kcnb1	37	1969	0.36	0.00056
GO:0048513	Animal organ development	Alas2,Psmb9,Ring1,Cdk1,Aif1,Ran,Nfia,Gc,Col3a1,Col1a1,Lum,Cst3,Fkbp4,Adrm1,Lmo2,Dpysl2,Nos3,Glud1,Col1a2,C1qb,Lrig1,Sparc,Tgm2,Idh1,Rbp4,Epn1,Hyal3,Cd4,Plg,Vim,Ccnb1,Cd74,Dvl1,Coro1a,Lrig3,Nfam1,Pld4,Gnas,Fcer1g,Smad3,Atp8b1,Mki67,Eef2,CYTB,Hbb,Agrn,Plscr1,Prlr,Ubn1,Ptpn6,Spp1,Ece1,Cebpa,Rgs7,Pros1,Lox,Ccr5	57	3758	0.26	0.00056
GO:0051240	Positive regulation of multicellular organismal process	Cdk1,Aif1,Por,Cxcl1,Alb,Col1a1,Lum,Mapk6,Nos3,Furin,Prkcb,Sparc,Cyba,Pdcl3,Ect2,Rgs14,Cd4,Gnai2,Plg,Vim,Ccnb1,Cd74,Dvl1,Nfam1,Fgg,Gnas,Fcer1g,Smad3,ENSRNOP00000047118,Gpam,Agrn,Apoe,Atp6ap1,Prlr,Spp1,Ece1,Cebpa,Ccr5	38	2053	0.35	0.00056
GO:0023056	Positive regulation of signaling	Por,Col3a1,Col1a1,Rap1b,Adrm1,Phip,Glud1,S100a8,Furin,Prkcb,Cyba,Rnf111,Tgm2,Rbp4,Rgs14,Cd4,Fam92a1,Gnai2,Hpx,Cd74,Dvl1,Nfam1,Fgg,Gnas,Smad3,Apoe,Atp6ap1,Plscr1,Prlr,Ptpn6,Spp1,Aaed1,Ece1,Pea15,Ube2n,Glul,Kcnb1	37	1976	0.36	0.00059
GO:0009893	Positive regulation of metabolic process	Cdk1,Aif1,Pcolce,Por,Cxcl1,Nfia,Col1a1,C4bpa,Lum,Dazap2,Cst3,Aurkb,Fabp1,Rap1b,Adrm1,Phip,Tnfaip1,Lmo2,Nos3,Dap,S100a8,Furin,Prkcb,Cyba,Pdcl3,Rnf111,Ect2,Ccna2,Cd4,Gnai2,Coq7,Vim,Hpx,Ccnb1,Cd74,RGD1303130,Dvl1,Nfam1,Fgg,Gnas,Fcer1g,Smad3,Eef2,Comt,ENSRNOP00000047118,Gpam,Agrn,Lcp2,Apoe,Atp6ap1,Plscr1,Prlr,Scarb1,Spp1,Aaed1,Papd5,Ece1,Cebpa,Ccnd3,Ube2n,Apoa4,Ccr5	62	4260	0.25	0.0006
GO:0031960	Response to corticosteroid	Aif1,Ran,Acads,Cxcl1,Col1a1,Nos3,C1qb,Sparc,Cyba,Bckdha,ND3,Cebpa,Birc5	13	308	0.71	0.00062
GO:0009628	Response to abiotic stimulus	Alas2,Psmb9,Aif1,Cxcl1,Col3a1,Col1a1,Cst3,Aurkb,Fabp1,Serpina1,Nos3,Prkcb,Sparc,Cyba,Pdcl3,Ect2,Rbp4,Hyal3,Rgs14,Vim,Ccnb1,Ctss,Smad3,ND3,CYTB,Atp6ap1,Anxa7,Ece1,Rgs7,Ccr5	30	1428	0.41	0.00063
GO:0043085	Positive regulation of catalytic activity	Pcolce,Por,Dazap2,Arhgdib,Aurkb,Fabp1,Adrm1,Depdc1,Nos3,Dap,S100a8,Ywhab,Cyba,Ect2,Rgs14,Cd4,Gnai2,Ccnb1,Cd74,Gnas,Smad3,Agrn,Lcp2,Apoe,Plscr1,Prlr,Scarb1,Rgs7,Ccnd3,Ube2n,Apoa4	31	1503	0.4	0.00063
GO:0044093	Positive regulation of molecular function	Ran,Pcolce,Por,Dazap2,Arhgdib,Aurkb,Fabp1,Adrm1,Depdc1,Nos3,Mark3,Dap,S100a8,Prkcb,Ywhab,Cyba,Ect2,Rgs14,Cd4,Gnai2,Ccnb1,Cd74,Ctss,Nfam1,Gnas,Smad3,Agrn,Lcp2,Apoe,Plscr1,Prlr,Scarb1,Rgs7,Ccnd3,Ube2n,Apoa4	36	1905	0.36	0.00063
GO:0010646	Regulation of cell communication	Rnf115,Pfkl,Gna12,Por,Col3a1,Col1a1,Rhot1,Arhgdib,Rap1b,Adrm1,Phip,Tnfaip1,Glud1,Mark3,S100a8,Furin,Prkcb,Ywhab,Cyba,Rnf111,Tgm2,Rbp4,Rgs14,Cd4,Fam92a1,Gnai2,Plg,Hpx,Cd74,Dvl1,Nfam1,Fgg,Gnas,Slc24a6,Smad3,Gpam,Agrn,Apoe,Atp6ap1,Plscr1,Grina,Prlr,Ptpn6,Cdk16,Spp1,Aaed1,Ece1,Rgs7,Ccnd3,Pea15,Ube2n,Lox,Birc5,Glul,Kcnb1	55	3618	0.26	0.00073
GO:0006979	Response to oxidative stress	Cdk1,Aif1,Col1a1,Cst3,Fabp1,Oxr1,Nos3,Ect2,Idh1,Rgs14,Coq7,ND3,Eef2,Hbb,Apoe,Apoa4	16	484	0.6	0.00085
GO:0065007	Biological regulation	Rnf115,Alas2,Psmb8,Psmb9,Ring1,Cdk1,Aif1,Ran,Pfkl,Gna12,Pcolce,Por,Cxcl1,Alb,Nfia,Gc,Col3a1,Pttg1,Col1a1,Pfdn2,C4bpa,Lum,Rhot1,Dazap2,Cst3,Vapb,Surf4,Arhgdib,Aurkb,Eif1ax,Fkbp4,Fabp1,Ambp,Rap1b,Adrm1,Oxr1,Phip,Arpc4,Tnfaip1,Serpina1,Lmo2,Depdc1,Hsd17b12,Dpysl2,Mapk6,Nos3,Glud1,Mark3,Dap,RGD1309676,Ankrd13c,S100a8,Furin,Prkcb,Col1a2,Ywhab,C1qb,Fgl2,Rbl2,Sparc,Cyba,Pdcl3,Rnf111,Ect2,Mvd,Tgm2,Retsat…	147	14272	0.1	0.00085
GO:0009617	Response to bacterium	Psmb9,Abcc5,Cxcl1,C4bpa,Lyz2,Serpina1,Nos3,S100a8,Sparc,Cd4,Vim,Rab14,Fcer1g,Comt,Plscr1,Ccdc80,Prlr,Scarb1,Igg-2a,Pros1,Ccr5,Slpi	22	871	0.49	0.00089
GO:0019220	Regulation of phosphate metabolic process	Cdk1,Aif1,Dazap2,Rap1b,Phip,Nos3,Ywhab,Rbl2,Pdcl3,Ect2,Idh1,Ctdsp1,Ccna2,Rgs14,Cd4,Gnai2,Hpx,Ccnb1,Cd74,Dvl1,Fgg,Gnas,Smad3,ENSRNOP00000047118,Hbb,Agrn,Lcp2,Apoe,Atp6ap1,Prlr,Ptpn6,Scarb1,Aaed1,Ece1,Ccnd3,Lox	36	1953	0.35	0.00095
GO:0051716	Cellular response to stimulus	Psmb9,Cdk1,Aif1,Ran,Gna12,Pcolce,Por,Cxcl1,Alb,Col3a1,Pttg1,Col1a1,Rhot1,Cst3,Vapb,Arhgdib,Aurkb,Fkbp4,Fabp1,Rap1b,Adrm1,Oxr1,Phip,Arpc4,Tnfaip1,Lmo2,Depdc1,Mapk6,Nos3,Mark3,Dap,RGD1309676,Laptm5,Cmbl,S100a8,Prkcb,Col1a2,Sparc,Cyba,Pdcl3,Rnf111,Ect2,Tgm2,Ifitm2,Ccna2,Epn1,Hyal3,Rgs14,Cd4,Ttr,Gnai2,Epg5,Coq7,Vim,Ccnb1,Cd74,Rab14,Dvl1,Coro1a,Nucb1,Dync1li2,Nfam1,Fgg,Gnas,Fcer1g,Smad3,ND3,Eef2,Ifitm…	94	7732	0.17	0.00095
GO:0032101	Regulation of response to external stimulus	Aif1,Cxcl1,S100a8,Fgl2,Cyba,Tgm2,Plg,Hpx,Cd74,Dvl1,Ctss,Pld4,Fgg,Slc24a6,Fcer1g,Smad3,Agrn,Apoe,Plscr1,Spp1,Cebpa,Pros1,Ccr5	23	951	0.47	0.00099
GO:0002682	Regulation of immune system process	Aif1,Cxcl1,Col3a1,C4bpa,Adrm1,Arpc4,Lmo2,RGD1309676,Prkcb,C1qb,Fgl2,Rbp4,Cd4,Hpx,Cd74,Coro1a,Nfam1,Gnas,Slc24a6,Fcer1g,Smad3,Gpam,Lcp2,Apoe,Atp6ap1,Plscr1,Ptpn6,Igg-2a,Cebpa,Ube2n,Lox	31	1557	0.38	0.001
GO:0044281	Small molecule metabolic process	Ran,Acads,Pfkl,Por,Gc,Hsd17b12,Nos3,Dpagt1,Glud1,Prkcb,Mvd,Psat1,Retsat,Idh1,Rbp4,Hyal3,Ttr,Coq7,Ahcyl2,Cd74,Bckdha,Atp8b1,Cbr4,Tst,Comt,Gpam,Apoe,Mmadhc,Scarb1,Spp1,Cebpa,Ccnd3,Apoa4,Glul	34	1796	0.36	0.001
GO:0009636	Response to toxic substance	Cdk1,Cst3,Fabp1,Nos3,RGD1309676,S100a8,Ccnb1,CYTB,Hbb,Apoe,Aaed1,Apoa4	12	290	0.7	0.0014
GO:0034754	Cellular hormone metabolic process	Hsd17b12,Retsat,Rbp4,Ttr,Comt,Scarb1,Spp1,Ece1	8	115	0.93	0.0014
GO:0007584	Response to nutrient	Por,Alb,Col1a1,Prkcb,Sparc,Cd4,Vim,Bckdha,Eef2,CYTB,Spp1,Cebpa	12	292	0.7	0.0015
GO:0009611	Response to wounding	Cdk1,Aif1,Col3a1,Col1a1,Cst3,Nos3,S100a8,Sparc,Plg,Fgg,Gnas,Apoe,Ptpn6,Pros1,Lox	15	460	0.6	0.0015
GO:0048731	System development	Alas2,Psmb9,Ring1,Cdk1,Aif1,Ran,Nfia,Gc,Col3a1,Col1a1,Lum,Cst3,Fkbp4,Adrm1,Lmo2,Dpysl2,Mapk6,Nos3,Glud1,S100a8,Col1a2,C1qb,Lrig1,Sparc,Pdcl3,Ect2,Tgm2,Idh1,Ctdsp1,Rbp4,Epn1,Hyal3,Rgs14,Cd4,Coq7,Plg,Vim,Ccnb1,Cd74,Dvl1,Coro1a,Lrig3,Nfam1,Pld4,Gnas,LOC685707,Fcer1g,Smad3,Atp8b1,Mki67,Eef2,CYTB,Hbb,Agrn,Apoe,Plscr1,Prlr,Ubn1,Ptpn6,Cdk16,Spp1,Ece1,Cebpa,Rgs7,Pros1,Lox,Glul,Ccr5	68	5030	0.21	0.0015
GO:0051234	Establishment of localization	Alas2,Aif1,Ran,Abcc5,Nuf2,Gc,Col1a1,Rhot1,Vapb,Fkbp4,Fabp1,Nup210,Phip,Arpc4,Slco2a1,Dpysl2,Furin,Prkcb,Ywhab,Ect2,Tgm2,Rbp4,Epn1,Rgs14,Ttr,Letm1,Epg5,Hpx,Ccnb1,Cd74,Rab14,Dvl1,Coro1a,Selenbp1,Fxyd5,Pld4,Fgg,Slc24a6,Fcer1g,Atp8b1,Tst,ENSRNOP00000047118,CYTB,Hbb,Lcp2,Apoe,Ap1ar,Atp6ap1,Plscr1,Grina,Prlr,Cdk16,Scarb1,Magt1,Igg-2a,Pea15,Apoa4,Birc5,Kcnb1,Ccr5	60	4227	0.24	0.0015
GO:0052547	Regulation of peptidase activity	Psmb8,Psmb9,Pcolce,Por,Pttg1,Cst3,Fabp1,Ambp,Adrm1,Serpina1,Dap,S100a8,Furin,Smad3,Birc5,Slpi	16	519	0.57	0.0015
GO:0016043	Cellular component organization	Ring1,Cdk1,Aif1,Ran,Pfkl,Nuf2,Nfia,Col3a1,Pttg1,Col1a1,Lum,Rhot1,Cst3,Vapb,Surf4,Aurkb,Fkbp4,Nup210,Adrm1,Phip,Arpc4,Tnfaip1,Hsd17b12,Dpysl2,Mark3,Prkcb,Col1a2,C1qb,Rbl2,Cyba,Pdcl3,Ect2,Ccna2,Epn1,Rgs14,Fam92a1,Letm1,Epg5,Coq7,Plg,Vim,Ccnb1,Cd74,Rab14,Dvl1,Coro1a,Ctss,Dync1li2,Fgg,LOC685707,Rpl23a,Fcer1g,Smad3,Atp8b1,Cbr4,Tst,Agrn,Apoe,Ap1ar,Plscr1,Ccdc80,Prlr,Ubn1,Anxa7,Cdk16,Scarb1,Spp1,Igg-2a,…	75	5777	0.2	0.0016
GO:0031325	Positive regulation of cellular metabolic process	Cdk1,Aif1,Pcolce,Por,Cxcl1,Nfia,Col1a1,Lum,Dazap2,Cst3,Aurkb,Fabp1,Rap1b,Adrm1,Phip,Tnfaip1,Lmo2,Nos3,Dap,S100a8,Prkcb,Cyba,Rnf111,Ect2,Ccna2,Cd4,Gnai2,Coq7,Vim,Hpx,Ccnb1,Cd74,RGD1303130,Dvl1,Fgg,Gnas,Smad3,Eef2,Comt,ENSRNOP00000047118,Gpam,Agrn,Lcp2,Apoe,Atp6ap1,Plscr1,Prlr,Scarb1,Spp1,Aaed1,Ece1,Cebpa,Ccnd3,Ube2n,Apoa4	55	3762	0.25	0.0017
GO:0032502	Developmental process	Alas2,Psmb8,Psmb9,Ring1,Cdk1,Aif1,Ran,Gna12,Nfia,Gc,Col3a1,Col1a1,Lum,Cst3,Aurkb,Fkbp4,Rap1b,Adrm1,Lmo2,Dpysl2,Mapk6,Nos3,Glud1,S100a8,Furin,Col1a2,C1qb,Rbl2,Lrig1,Sparc,Pdcl3,Rnf111,Ect2,Tgm2,Idh1,Ctdsp1,Rbp4,Epn1,Hyal3,Rgs14,Cd4,Fam92a1,Coq7,Plg,Vim,Ccnb1,Cd74,Dvl1,Coro1a,Selenbp1,Lrig3,Nfam1,Pld4,Fgg,Gnas,LOC685707,Fcer1g,Smad3,Atp8b1,Mki67,Tst,Eef2,Comt,CYTB,Hbb,Agrn,Apoe,Atp6ap1,Plscr1,Prlr,…	82	6549	0.18	0.0017
GO:0033273	Response to vitamin	Col1a1,Prkcb,Sparc,Cd4,Vim,Eef2,CYTB,Spp1,Cebpa	9	160	0.83	0.0017
GO:0048523	Negative regulation of cellular process	Rnf115,Ring1,Cdk1,Aif1,Pfkl,Por,Alb,Nfia,Col3a1,Pttg1,Col1a1,Cst3,Arhgdib,Aurkb,Fkbp4,Fabp1,Ambp,Rap1b,Oxr1,Phip,Tnfaip1,Serpina1,Lmo2,Depdc1,Nos3,Mark3,Dap,Furin,Prkcb,Ywhab,Fgl2,Rbl2,Sparc,Pdcl3,Ctdsp1,Rbp4,Rgs14,Letm1,Gnai2,Coq7,Plg,Vim,Ccnb1,Cd74,Dvl1,Coro1a,Fgg,Slc24a6,Fcer1g,Smad3,Atp8b1,Comt,Gpam,Agrn,Apoe,Ap1ar,Grina,Prlr,Ptpn6,Spp1,Papd5,Cebpa,Rgs7,Ccnd3,Pea15,Apoa4,Birc5,Kcnb1,Ccr5,Slpi	70	5264	0.21	0.0017
GO:0050794	Regulation of cellular process	Rnf115,Ring1,Cdk1,Aif1,Ran,Pfkl,Gna12,Pcolce,Por,Cxcl1,Alb,Nfia,Col3a1,Pttg1,Col1a1,Pfdn2,C4bpa,Lum,Rhot1,Dazap2,Cst3,Vapb,Surf4,Arhgdib,Aurkb,Eif1ax,Fkbp4,Fabp1,Ambp,Rap1b,Adrm1,Oxr1,Phip,Arpc4,Tnfaip1,Serpina1,Lmo2,Depdc1,Hsd17b12,Dpysl2,Mapk6,Nos3,Glud1,Mark3,Dap,RGD1309676,Ankrd13c,S100a8,Furin,Prkcb,Col1a2,Ywhab,Fgl2,Rbl2,Sparc,Cyba,Pdcl3,Rnf111,Ect2,Mvd,Tgm2,Ifitm2,Idh1,Ctdsp1,Rbp4,Ccna2,Ep…	136	12977	0.1	0.0017
GO:0050878	Regulation of body fluid levels	Alas2,Gc,Cyba,Gnai2,Plg,Rab14,Fgg,Gnas,Fcer1g,Apoe,Prlr,Anxa7,Ptpn6,Pros1	14	409	0.62	0.0017
GO:0097305	Response to alcohol	Cdk1,Serpina1,Nos3,S100a8,Prkcb,Sparc,Cyba,Rbp4,Eef2,CYTB,Apoe,Rgs7,Birc5,Ccr5	14	408	0.62	0.0017
GO:0045471	Response to ethanol	Cdk1,Nos3,S100a8,Prkcb,Sparc,Rbp4,Eef2,CYTB,Apoe,Rgs7,Birc5	11	253	0.72	0.0018
GO:0019222	Regulation of metabolic process	Psmb8,Psmb9,Ring1,Cdk1,Aif1,Gna12,Pcolce,Por,Cxcl1,Nfia,Pttg1,Col1a1,C4bpa,Lum,Dazap2,Cst3,Aurkb,Eif1ax,Fabp1,Ambp,Rap1b,Adrm1,Oxr1,Phip,Tnfaip1,Serpina1,Lmo2,Depdc1,Mapk6,Nos3,Dap,Ankrd13c,S100a8,Furin,Prkcb,Ywhab,Rbl2,Cyba,Pdcl3,Rnf111,Ect2,Idh1,Ctdsp1,Ccna2,Rgs14,Cd4,Mlf2,Gnai2,Coq7,Vim,Hpx,Ccnb1,Cd74,RGD1303130,Dvl1,Nfam1,Pld4,Fgg,Gnas,Fcer1g,Smad3,Atp8b1,Eef2,Comt,ENSRNOP00000047118,Hbb,Gpam…	90	7460	0.16	0.0019
GO:0051241	Negative regulation of multicellular organismal process	Col3a1,Cst3,Arhgdib,Fkbp4,Lmo2,Nos3,Furin,Fgl2,Sparc,Cyba,Ctdsp1,Rbp4,Epn1,Hyal3,Gnai2,Plg,Vim,Cd74,Fgg,Gnas,Smad3,Comt,Apoe,Ptpn6,Spp1,Pros1,Apoa4,Ccr5	28	1386	0.39	0.0019
GO:0060255	Regulation of macromolecule metabolic process	Psmb8,Psmb9,Ring1,Cdk1,Aif1,Gna12,Pcolce,Por,Nfia,Pttg1,Col1a1,C4bpa,Lum,Dazap2,Cst3,Aurkb,Eif1ax,Fabp1,Ambp,Rap1b,Adrm1,Oxr1,Phip,Tnfaip1,Serpina1,Lmo2,Depdc1,Mapk6,Nos3,Dap,Ankrd13c,S100a8,Furin,Prkcb,Ywhab,Rbl2,Cyba,Pdcl3,Rnf111,Ect2,Ctdsp1,Ccna2,Rgs14,Cd4,Mlf2,Gnai2,Coq7,Vim,Hpx,Ccnb1,Cd74,RGD1303130,Dvl1,Nfam1,Pld4,Fgg,Gnas,Fcer1g,Smad3,Atp8b1,Eef2,ENSRNOP00000047118,Hbb,Gpam,Agrn,Lcp2,Apoe,…	85	6903	0.17	0.0019
GO:1901564	Organonitrogen compound metabolic process	Rnf115,Alas2,Psmb8,Psmb9,Ring1,Cdk1,Ran,Pfkl,Pcolce,Por,Col3a1,Aurkb,Eif1ax,Fkbp4,Ambp,Ubl7,Adrm1,Tnfaip1,Mapk6,Nos3,Dpagt1,Glud1,Mark3,Mrps25,S100a8,Furin,Prkcb,Fgl2,Mrpl3,Rnf111,Mvd,Tgm2,Tinagl1,Psat1,Idh1,Ctdsp1,Cdca3,Ccna2,Hyal3,Ttr,Plg,Hpx,Ccnb1,Napsa,Ubl5,Bckdha,Mrpl16,Ctss,Fgg,Rpl23a,Tst,Eef2,Comt,ENSRNOP00000047118,Hbb,Gpam,Apoe,Plscr1,Prlr,Mmadhc,Ptpn6,Cdk16,Ppil1,Spp1,Magt1,Ece1,Cebpa,C…	74	5723	0.19	0.0019
GO:0016572	Histone phosphorylation	Cdk1,Aurkb,Prkcb,Ccna2,Ccnb1	5	33	1.26	0.002
GO:0042445	Hormone metabolic process	Hsd17b12,Furin,Retsat,Rbp4,Ttr,Comt,Scarb1,Spp1,Ece1	9	171	0.8	0.0025
GO:0048856	Anatomical structure development	Alas2,Psmb9,Ring1,Cdk1,Aif1,Ran,Gna12,Nfia,Gc,Col3a1,Col1a1,Lum,Cst3,Aurkb,Fkbp4,Rap1b,Adrm1,Lmo2,Dpysl2,Mapk6,Nos3,Glud1,S100a8,Furin,Col1a2,C1qb,Lrig1,Sparc,Pdcl3,Rnf111,Ect2,Tgm2,Idh1,Ctdsp1,Rbp4,Epn1,Hyal3,Rgs14,Cd4,Fam92a1,Coq7,Plg,Vim,Ccnb1,Cd74,Dvl1,Coro1a,Lrig3,Nfam1,Pld4,Fgg,Gnas,LOC685707,Fcer1g,Smad3,Atp8b1,Mki67,Tst,Eef2,CYTB,Hbb,Agrn,Apoe,Plscr1,Prlr,Ubn1,Anxa7,Ptpn6,Cdk16,Spp1,Ece1,…	77	6089	0.19	0.0025
GO:0048878	Chemical homeostasis	Alas2,Cxcl1,Vapb,Prkcb,Cyba,Tgm2,Rbp4,Cd4,Letm1,Hpx,Napsa,Gnas,Slc24a6,Smad3,Gpam,Apoe,Atp6ap1,Grina,Anxa7,Scarb1,Spp1,Papd5,Cebpa,Apoa4,Kcnb1,Ccr5	26	1255	0.4	0.0025
GO:0009743	Response to carbohydrate	Pfkl,Cst3,Rap1b,Nos3,Prkcb,Sparc,Cyba,Gpam,Ccnd3,Glul,Kcnb1	11	267	0.7	0.0026
GO:0043067	Regulation of programmed cell death	Cdk1,Aif1,Por,Alb,Cst3,Aurkb,Fabp1,Oxr1,Phip,Nos3,Dap,Ankrd13c,S100a8,Ect2,Tgm2,Gnai2,Cd74,Coro1a,Fgg,Fcer1g,Smad3,Gpam,Agrn,Apoe,Plscr1,Grina,Prlr,Pea15,Lox,Birc5,Kcnb1,Ccr5	32	1748	0.35	0.0027
GO:0052548	Regulation of endopeptidase activity	Psmb8,Psmb9,Por,Pttg1,Cst3,Fabp1,Ambp,Adrm1,Serpina1,Dap,S100a8,Furin,Smad3,Birc5,Slpi	15	492	0.57	0.0027
GO:0006952	Defense response	Aif1,Cxcl1,C4bpa,Cst3,Lyz2,Serpina1,S100a8,C1qb,Cyba,Ifitm2,Hyal3,Cd4,Vim,Cd74,Rab14,Coro1a,Pld4,Fcer1g,Ifitm1,Gpam,Plscr1,Ptpn6,Spp1,Igg-2a,Cebpa,Apoa4,Ccr5,Slpi	28	1429	0.38	0.0029
GO:0032103	Positive regulation of response to external stimulus	Aif1,Cxcl1,S100a8,Cyba,Tgm2,Plg,Hpx,Cd74,Ctss,Fcer1g,Smad3,Plscr1,Cebpa,Ccr5	14	440	0.59	0.0031
GO:0007275	Multicellular organism development	Alas2,Psmb9,Ring1,Cdk1,Aif1,Ran,Gna12,Nfia,Gc,Col3a1,Col1a1,Lum,Cst3,Aurkb,Fkbp4,Adrm1,Lmo2,Dpysl2,Mapk6,Nos3,Glud1,S100a8,Furin,Col1a2,C1qb,Lrig1,Sparc,Pdcl3,Rnf111,Ect2,Tgm2,Idh1,Ctdsp1,Rbp4,Epn1,Hyal3,Rgs14,Cd4,Fam92a1,Coq7,Plg,Vim,Ccnb1,Cd74,Dvl1,Coro1a,Lrig3,Nfam1,Pld4,Gnas,LOC685707,Fcer1g,Smad3,Atp8b1,Mki67,Eef2,CYTB,Hbb,Agrn,Apoe,Plscr1,Prlr,Ubn1,Ptpn6,Cdk16,Spp1,Ece1,Cebpa,Rgs7,Pros1,Lox…	73	5716	0.19	0.0033
GO:0071840	Cellular component organization or biogenesis	Ring1,Cdk1,Aif1,Ran,Pfkl,Nuf2,Nfia,Col3a1,Pttg1,Col1a1,Lum,Rhot1,Cst3,Vapb,Surf4,Aurkb,Fkbp4,Nup210,Adrm1,Phip,Arpc4,Tnfaip1,Hsd17b12,Dpysl2,Mark3,Prkcb,Col1a2,C1qb,Rbl2,Cyba,Pdcl3,Ect2,Ccna2,Epn1,Rgs14,Fam92a1,Letm1,Epg5,Coq7,Plg,Vim,Ccnb1,Cd74,Rab14,Dvl1,Coro1a,Ctss,Dync1li2,Fgg,LOC685707,Rpl23a,Fcer1g,Smad3,Atp8b1,Cbr4,Tst,Agrn,Apoe,Ap1ar,Plscr1,Ccdc80,Prlr,Ubn1,Anxa7,Cdk16,Scarb1,Spp1,Papd5,I…	77	6148	0.18	0.0033
GO:0006810	Transport	Alas2,Aif1,Ran,Abcc5,Gc,Col1a1,Rhot1,Vapb,Fkbp4,Fabp1,Nup210,Phip,Arpc4,Slco2a1,Dpysl2,Furin,Prkcb,Ywhab,Ect2,Tgm2,Rbp4,Epn1,Rgs14,Ttr,Letm1,Epg5,Hpx,Cd74,Rab14,Dvl1,Coro1a,Selenbp1,Fxyd5,Pld4,Fgg,Slc24a6,Fcer1g,Atp8b1,Tst,ENSRNOP00000047118,CYTB,Hbb,Lcp2,Apoe,Ap1ar,Atp6ap1,Plscr1,Grina,Prlr,Cdk16,Scarb1,Magt1,Igg-2a,Pea15,Apoa4,Kcnb1,Ccr5	57	4083	0.23	0.0034
GO:0051336	Regulation of hydrolase activity	Psmb8,Psmb9,Pcolce,Por,Pttg1,Cst3,Arhgdib,Fabp1,Ambp,Adrm1,Serpina1,Depdc1,Nos3,Dap,S100a8,Furin,Ect2,Rgs14,Gnai2,Gnas,Smad3,Agrn,Plscr1,Rgs7,Apoa4,Birc5,Slpi	27	1373	0.38	0.0037
GO:0080090	Regulation of primary metabolic process	Psmb8,Psmb9,Ring1,Aif1,Gna12,Pcolce,Por,Nfia,Pttg1,Col1a1,C4bpa,Lum,Dazap2,Cst3,Aurkb,Eif1ax,Fabp1,Ambp,Rap1b,Adrm1,Oxr1,Phip,Tnfaip1,Serpina1,Lmo2,Depdc1,Nos3,Dap,S100a8,Furin,Prkcb,Ywhab,Rbl2,Pdcl3,Rnf111,Ect2,Idh1,Ctdsp1,Ccna2,Rgs14,Cd4,Mlf2,Gnai2,Coq7,Vim,Hpx,Ccnb1,Cd74,RGD1303130,Dvl1,Nfam1,Fgg,Gnas,Smad3,Atp8b1,Eef2,Comt,ENSRNOP00000047118,Hbb,Gpam,Agrn,Lcp2,Apoe,Atp6ap1,Plscr1,Prlr,Ptpn6,C…	80	6520	0.17	0.0043
GO:0009987	Cellular process	Rnf115,Alas2,Psmb8,Psmb9,Ring1,Cdk1,Aif1,Ran,Acads,Ndufv3,Pfkl,Gna12,Pcolce,Por,Abcc5,Ugt2b15,Nuf2,Cxcl1,Alb,Nfia,Gc,Col3a1,Pttg1,Col1a1,Pfdn2,C4bpa,Lum,Rhot1,Cst3,Vapb,Surf4,Lyz2,Arhgdib,Aurkb,Eif1ax,Fkbp4,Fabp1,Nup210,Ambp,Rap1b,Ubl7,Adrm1,Oxr1,Phip,Arpc4,Slco2a1,Tnfaip1,Lmo2,Depdc1,Hsd17b12,Dpysl2,Mapk6,Nos3,Dpagt1,Glud1,Mark3,Dap,RGD1309676,Mrps25,Ankrd13c,Laptm5,Cmbl,S100a8,Furin,Prkcb,Col1a…	170	18050	0.06	0.0044
GO:0010604	Positive regulation of macromolecule metabolic process	Cdk1,Aif1,Pcolce,Nfia,Col1a1,C4bpa,Lum,Dazap2,Cst3,Aurkb,Rap1b,Adrm1,Phip,Tnfaip1,Lmo2,Nos3,Dap,S100a8,Furin,Prkcb,Cyba,Pdcl3,Rnf111,Ect2,Ccna2,Cd4,Gnai2,Coq7,Vim,Hpx,Ccnb1,Cd74,RGD1303130,Dvl1,Nfam1,Fgg,Gnas,Fcer1g,Smad3,Eef2,ENSRNOP00000047118,Agrn,Lcp2,Apoe,Atp6ap1,Plscr1,Prlr,Spp1,Aaed1,Papd5,Ece1,Cebpa,Ccnd3,Ube2n,Ccr5	55	3927	0.23	0.0044
GO:0042592	Homeostatic process	Alas2,Cxcl1,Rhot1,Vapb,Nos3,Prkcb,Cyba,Tgm2,Rbp4,Cd4,Letm1,Plg,Hpx,Coro1a,Napsa,Ctss,Gnas,Slc24a6,Smad3,Hbb,Gpam,Apoe,Atp6ap1,Grina,Anxa7,Scarb1,Spp1,Papd5,Cebpa,Lox,Apoa4,Kcnb1,Ccr5	33	1887	0.33	0.0044
GO:0042981	Regulation of apoptotic process	Cdk1,Aif1,Por,Alb,Aurkb,Fabp1,Oxr1,Phip,Nos3,Dap,Ankrd13c,S100a8,Ect2,Tgm2,Gnai2,Cd74,Coro1a,Fgg,Fcer1g,Smad3,Gpam,Agrn,Apoe,Plscr1,Grina,Prlr,Pea15,Lox,Birc5,Kcnb1,Ccr5	31	1720	0.34	0.0044
GO:0043903	Regulation of symbiotic process	Cxcl1,Vapb,Ifitm2,Cd4,Cd74,Ifitm1,Apoe,Plscr1,Ccr5,Slpi	10	239	0.7	0.0048
GO:0001932	Regulation of protein phosphorylation	Aif1,Dazap2,Rap1b,Phip,Pdcl3,Ect2,Ctdsp1,Ccna2,Rgs14,Cd4,Gnai2,Hpx,Ccnb1,Cd74,Dvl1,Fgg,Gnas,ENSRNOP00000047118,Hbb,Agrn,Lcp2,Apoe,Atp6ap1,Prlr,Ptpn6,Aaed1,Ece1,Ccnd3,Lox	29	1567	0.35	0.0049
GO:0030162	Regulation of proteolysis	Psmb8,Psmb9,Gna12,Pcolce,Por,Pttg1,Cst3,Fabp1,Ambp,Adrm1,Serpina1,Dap,S100a8,Furin,Pdcl3,Dvl1,Smad3,Apoe,Birc5,Slpi	20	868	0.45	0.0049
GO:0042325	Regulation of phosphorylation	Cdk1,Aif1,Dazap2,Rap1b,Phip,Rbl2,Pdcl3,Ect2,Ctdsp1,Ccna2,Rgs14,Cd4,Gnai2,Hpx,Ccnb1,Cd74,Dvl1,Fgg,Gnas,ENSRNOP00000047118,Hbb,Agrn,Lcp2,Apoe,Atp6ap1,Prlr,Ptpn6,Aaed1,Ece1,Ccnd3,Lox	31	1732	0.34	0.0049
GO:0002684	Positive regulation of immune system process	Aif1,Cxcl1,C4bpa,Arpc4,Prkcb,C1qb,Rbp4,Cd4,Hpx,Cd74,Coro1a,Nfam1,Gnas,Fcer1g,Gpam,Lcp2,Atp6ap1,Plscr1,Ptpn6,Igg-2a,Cebpa,Ube2n	22	1018	0.42	0.0051
GO:0009967	Positive regulation of signal transduction	Por,Col3a1,Col1a1,Rap1b,Adrm1,Phip,S100a8,Furin,Prkcb,Cyba,Rnf111,Tgm2,Cd4,Fam92a1,Gnai2,Hpx,Cd74,Dvl1,Nfam1,Fgg,Gnas,Smad3,Apoe,Atp6ap1,Plscr1,Prlr,Ptpn6,Aaed1,Ece1,Pea15,Ube2n	31	1743	0.33	0.0053
GO:0010941	Regulation of cell death	Cdk1,Aif1,Por,Alb,Cst3,Aurkb,Fabp1,Oxr1,Phip,Nos3,Dap,Ankrd13c,S100a8,Ect2,Tgm2,Gnai2,Cd74,Coro1a,Fgg,Fcer1g,Smad3,Hbb,Gpam,Agrn,Apoe,Plscr1,Grina,Prlr,Pea15,Lox,Birc5,Kcnb1,Ccr5	33	1915	0.32	0.0053
GO:0055114	Oxidation-reduction process	Acads,Ndufv3,Pfkl,Por,Oxr1,Hsd17b12,Nos3,Glud1,RGD1309676,Cyba,Retsat,Idh1,Lyrm5,Tkt,Coq7,Bckdha,Selenbp1,Gnas,Cbr4,ND3,ND2,CYTB,Aaed1,Lox	24	1177	0.39	0.0054
GO:1901615	Organic hydroxy compound metabolic process	Gc,Dpagt1,Mvd,Retsat,Idh1,Rbp4,Ttr,Atp8b1,Cbr4,Comt,Apoe,Scarb1,Cebpa,Apoa4	14	477	0.55	0.006
GO:0042127	Regulation of cell population proliferation	Cdk1,Aif1,Por,Cxcl1,Pttg1,Cst3,Phip,Nos3,Sparc,Cyba,Pdcl3,Mvd,Tgm2,Rbp4,Cd4,Gnai2,Vim,Ccnb1,Cd74,Coro1a,Gnas,Tspan31,Smad3,Comt,Gpam,Apoe,Ptpn6,Cebpa,Ccnd3,Birc5,Glul,Ccr5	32	1853	0.32	0.0066
GO:0019725	Cellular homeostasis	Alas2,Cxcl1,Rhot1,Vapb,Prkcb,Cyba,Tgm2,Cd4,Letm1,Plg,Hpx,Slc24a6,Smad3,Apoe,Atp6ap1,Grina,Anxa7,Spp1,Lox,Kcnb1,Ccr5	21	968	0.42	0.0068
GO:0051050	Positive regulation of transport	Cdk1,Ran,Cxcl1,Dpysl2,Glud1,S100a8,Cyba,Ect2,Rbp4,Hyal3,Cd4,Gnai2,Ctss,Fgg,Gnas,Fcer1g,Apoe,Atp6ap1,Spp1,Rgs7,Pros1,Glul,Kcnb1	23	1122	0.39	0.0069
GO:0002791	Regulation of peptide secretion	Pfkl,Glud1,S100a8,Rbp4,Cd74,Fgg,Slc24a6,Gpam,Apoe,Cdk16,Birc5,Glul,Kcnb1	13	430	0.56	0.0081
GO:0030155	Regulation of cell adhesion	Aif1,Col1a1,Hsd17b12,Fgl2,Tgm2,Cd4,Plg,Cd74,Coro1a,Fgg,Smad3,Gpam,Ap1ar,Ccdc80,Prlr,Ptpn6,Spp1,Ccr5	18	762	0.46	0.0081
GO:0032496	Response to lipopolysaccharide	Abcc5,Cxcl1,Serpina1,Nos3,S100a8,Sparc,Vim,Comt,Plscr1,Scarb1,Pros1,Ccr5,Slpi	13	431	0.56	0.0081
GO:0051171	Regulation of nitrogen compound metabolic process	Psmb8,Psmb9,Ring1,Aif1,Gna12,Pcolce,Por,Nfia,Pttg1,Col1a1,C4bpa,Lum,Dazap2,Cst3,Aurkb,Eif1ax,Fabp1,Ambp,Rap1b,Adrm1,Oxr1,Phip,Tnfaip1,Serpina1,Lmo2,Depdc1,Nos3,Dap,S100a8,Furin,Prkcb,Ywhab,Rbl2,Pdcl3,Rnf111,Ect2,Ctdsp1,Ccna2,Rgs14,Cd4,Mlf2,Gnai2,Coq7,Vim,Hpx,Ccnb1,Cd74,RGD1303130,Dvl1,Nfam1,Fgg,Gnas,Smad3,Atp8b1,Eef2,Comt,ENSRNOP00000047118,Hbb,Agrn,Lcp2,Apoe,Atp6ap1,Plscr1,Prlr,Ptpn6,Cdk16,Scarb…	77	6337	0.17	0.0081
GO:0040008	Regulation of growth	Cdk1,Por,Pttg1,Phip,Dpysl2,Prkcb,Cyba,Rbp4,Tkt,Cd53,Ccnb1,Gnas,Smad3,Gpam,Agrn,Apoe,Spp1,Ccr5	18	767	0.45	0.0085
GO:0030199	Collagen fibril organization	Col3a1,Col1a1,Lum,Col1a2,Lox	5	50	1.08	0.0087
GO:0006875	Cellular metal ion homeostasis	Alas2,Cxcl1,Vapb,Prkcb,Tgm2,Cd4,Letm1,Hpx,Slc24a6,Smad3,Apoe,Atp6ap1,Grina,Anxa7,Spp1,Ccr5	16	631	0.49	0.0089
GO:0007166	Cell surface receptor signaling pathway	Cxcl1,Col3a1,Col1a1,Phip,Arpc4,Nos3,Prkcb,Col1a2,Rnf111,Ifitm2,Epn1,Rgs14,Cd4,Gnai2,Vim,Cd74,Rab14,Dvl1,Coro1a,Nfam1,Fcer1g,Smad3,Ifitm1,Lcp2,Prlr,Ptpn6,Scarb1,Igg-2a,Cebpa,Ube2n,Lox,Kcnb1,Ccr5	33	1982	0.3	0.0092
GO:0055065	Metal ion homeostasis	Alas2,Cxcl1,Vapb,Prkcb,Tgm2,Cd4,Letm1,Hpx,Gnas,Slc24a6,Smad3,Apoe,Atp6ap1,Grina,Anxa7,Spp1,Ccr5	17	708	0.46	0.01
GO:0046883	Regulation of hormone secretion	Pfkl,Glud1,Rbp4,Fgg,Gnas,Slc24a6,Cdk16,Spp1,Birc5,Glul,Kcnb1	11	327	0.61	0.011
GO:0098542	Defense response to other organism	Aif1,C4bpa,Lyz2,S100a8,C1qb,Cyba,Ifitm2,Cd4,Vim,Rab14,Coro1a,Pld4,Fcer1g,Ifitm1,Gpam,Plscr1,Ptpn6,Igg-2a,Apoa4,Ccr5,Slpi	21	1011	0.4	0.0113
GO:0045937	Positive regulation of phosphate metabolic process	Cdk1,Aif1,Dazap2,Rap1b,Phip,Nos3,Ect2,Cd4,Gnai2,Hpx,Ccnb1,Cd74,Dvl1,Fgg,Gnas,Smad3,ENSRNOP00000047118,Agrn,Lcp2,Apoe,Atp6ap1,Prlr,Aaed1,Ccnd3	24	1249	0.37	0.0116
GO:1903035	Negative regulation of response to wounding	Plg,Fgg,Smad3,Apoe,Spp1,Pros1	6	89	0.91	0.0123
GO:0043434	Response to peptide hormone	Por,Abcc5,Col1a1,Rap1b,Phip,Nos3,Sparc,Cyba,Rbp4,CYTB,Gpam,Apoe,Ccnd3,Birc5	14	519	0.51	0.0124
GO:0045785	Positive regulation of cell adhesion	Aif1,Hsd17b12,Tgm2,Cd4,Cd74,Coro1a,Fgg,Smad3,Gpam,Ccdc80,Ptpn6,Spp1,Ccr5	13	456	0.54	0.0126
GO:0055074	Calcium ion homeostasis	Cxcl1,Vapb,Prkcb,Tgm2,Cd4,Letm1,Gnas,Slc24a6,Smad3,Apoe,Grina,Anxa7,Spp1,Ccr5	14	520	0.51	0.0126
GO:0009056	Catabolic process	Rnf115,Psmb8,Psmb9,Acads,Pfkl,Plbd2,Por,Ugt2b15,Ambp,Ubl7,Adrm1,Tnfaip1,Nos3,Glud1,Dap,S100a8,Rnf111,Hyal3,Epg5,Plg,Napsa,Bckdha,Ctss,Comt,ENSRNOP00000047118,Hbb,Apoe,Anxa7,Scarb1,Spp1,Papd5,Ece1,Ube2n,Apoa4	34	2117	0.29	0.0129
GO:0051384	Response to glucocorticoid	Aif1,Acads,Cxcl1,Nos3,C1qb,Sparc,Bckdha,ND3,Cebpa,Birc5	10	279	0.64	0.0129
GO:0090087	Regulation of peptide transport	Cdk1,Ran,Pfkl,Glud1,S100a8,Ect2,Rbp4,Cd74,Nucb1,Fgg,Slc24a6,Gpam,Apoe,Cdk16,Birc5,Glul,Kcnb1	17	731	0.45	0.0134
GO:0006066	Alcohol metabolic process	Dpagt1,Mvd,Retsat,Idh1,Rbp4,Ttr,Cbr4,Apoe,Scarb1,Cebpa,Apoa4	11	340	0.59	0.014
GO:0070482	Response to oxygen levels	Alas2,Col1a1,Cst3,Fabp1,Serpina1,Nos3,Prkcb,Cyba,Ccnb1,Smad3,CYTB,Atp6ap1,Ece1	13	463	0.53	0.014
GO:0034284	Response to monosaccharide	Pfkl,Nos3,Prkcb,Sparc,Cyba,Gpam,Ccnd3,Glul,Kcnb1	9	231	0.67	0.0147
GO:0031399	Regulation of protein modification process	Aif1,Dazap2,Rap1b,Oxr1,Phip,Ywhab,Pdcl3,Rnf111,Ect2,Ctdsp1,Ccna2,Rgs14,Cd4,Gnai2,Hpx,Ccnb1,Cd74,Dvl1,Fgg,Gnas,ENSRNOP00000047118,Hbb,Agrn,Lcp2,Apoe,Atp6ap1,Prlr,Ptpn6,Aaed1,Ece1,Ccnd3,Ube2n,Lox	33	2048	0.29	0.0148
GO:0022900	Electron transport chain	Ndufv3,Por,Cyba,Lyrm5,Coq7,ND2,CYTB	7	135	0.8	0.0149
GO:0051301	Cell division	Cdk1,Ran,Nuf2,Pttg1,Aurkb,Ect2,Cdca3,Ccna2,Rgs14,Gnai2,Ccnb1,Papd5,Ccnd3,Birc5	14	533	0.5	0.015
GO:0051247	Positive regulation of protein metabolic process	Aif1,Pcolce,C4bpa,Dazap2,Rap1b,Adrm1,Phip,Dap,S100a8,Rnf111,Ect2,Cd4,Gnai2,Vim,Hpx,Ccnb1,Cd74,Dvl1,Fgg,Gnas,Smad3,Eef2,ENSRNOP00000047118,Agrn,Lcp2,Apoe,Atp6ap1,Prlr,Aaed1,Ccnd3,Ube2n	31	1875	0.3	0.0151
GO:0051047	Positive regulation of secretion	Dpysl2,Glud1,S100a8,Cyba,Rbp4,Hyal3,Gnai2,Fgg,Fcer1g,Atp6ap1,Spp1,Glul,Kcnb1	13	470	0.52	0.0155
GO:0061024	Membrane organization	Aif1,Rhot1,Vapb,Aurkb,Arpc4,Epn1,Fam92a1,Letm1,Dvl1,Fcer1g,Atp8b1,Agrn,Apoe,Plscr1,Anxa7,Igg-2a,Apoa4	17	746	0.44	0.0158
GO:0032270	Positive regulation of cellular protein metabolic process	Aif1,Pcolce,Dazap2,Rap1b,Adrm1,Phip,Dap,S100a8,Rnf111,Ect2,Cd4,Gnai2,Vim,Hpx,Ccnb1,Cd74,Dvl1,Fgg,Gnas,Smad3,Eef2,ENSRNOP00000047118,Agrn,Lcp2,Apoe,Atp6ap1,Prlr,Aaed1,Ccnd3,Ube2n	30	1795	0.31	0.0159
GO:0070372	Regulation of erk1 and erk2 cascade	Rap1b,Rgs14,Cd4,Gnai2,Cd74,Fgg,Apoe,Atp6ap1,Ptpn6,Aaed1,Ece1	11	348	0.58	0.0159
GO:0032355	Response to estradiol	Cxcl1,Gc,Col1a1,Cst3,Serpina1,Nos3,Cd4,Vim,Eef2	9	238	0.66	0.0171
GO:0051353	Positive regulation of oxidoreductase activity	Por,Cyba,Gnai2,Apoe,Scarb1	5	61	1	0.0171
GO:0035556	Intracellular signal transduction	Aif1,Gna12,Arhgdib,Rap1b,Depdc1,Mapk6,Nos3,Mark3,Prkcb,Col1a2,Ect2,Ccna2,Rgs14,Gnai2,Rab14,Dvl1,Nucb1,Nfam1,Gnas,Lcp2,Apoe,Plscr1,Dgkh,Ptpn6,Rgs7,Lox,Ccr5	27	1548	0.32	0.0173
GO:0043066	Negative regulation of apoptotic process	Cdk1,Aif1,Por,Alb,Aurkb,Fabp1,Oxr1,Phip,Gnai2,Cd74,Coro1a,Fgg,Fcer1g,Smad3,Gpam,Apoe,Grina,Prlr,Pea15,Birc5,Ccr5	21	1057	0.38	0.0173
GO:0051270	Regulation of cellular component movement	Aif1,Gna12,Col3a1,Col1a1,Rhot1,Arhgdib,Nos3,Furin,Sparc,Gnai2,Plg,Vim,Cd74,Coro1a,Slc24a6,Smad3,ENSRNOP00000047118,Agrn,Apoe,Ap1ar,Glul,Ccr5	22	1138	0.37	0.0175
GO:0002923	Regulation of humoral immune response mediated by circulating immunoglobulin	C4bpa,Hpx,Ptpn6	3	12	1.48	0.0181
GO:0015748	Organophosphate ester transport	Fabp1,Epg5,Atp8b1,Apoe,Plscr1,Scarb1,Apoa4	7	143	0.77	0.0191
GO:0031349	Positive regulation of defense response	Cxcl1,S100a8,Cyba,Tgm2,Hpx,Ctss,Fcer1g,Plscr1,Cebpa,Ccr5	10	299	0.61	0.0191
GO:0002449	Lymphocyte mediated immunity	C4bpa,C1qb,Fgl2,Cd74,Coro1a,Fcer1g,Ptpn6,Igg-2a	8	192	0.7	0.0196
GO:1901652	Response to peptide	Por,Abcc5,Col1a1,Rap1b,Phip,Nos3,Sparc,Cyba,Rbp4,Vim,CYTB,Gpam,Apoe,Ccnd3,Birc5	15	622	0.47	0.0196
GO:0055082	Cellular chemical homeostasis	Alas2,Cxcl1,Vapb,Prkcb,Cyba,Tgm2,Cd4,Letm1,Hpx,Slc24a6,Smad3,Apoe,Atp6ap1,Grina,Anxa7,Spp1,Kcnb1,Ccr5	18	843	0.41	0.0203
GO:2000107	Negative regulation of leukocyte apoptotic process	Aurkb,Cd74,Fcer1g,Gpam,Ccr5	5	65	0.97	0.0208
GO:0043691	Reverse cholesterol transport	Apoe,Scarb1,Apoa4	3	13	1.45	0.0211
GO:0042327	Positive regulation of phosphorylation	Cdk1,Aif1,Dazap2,Rap1b,Phip,Ect2,Cd4,Gnai2,Hpx,Ccnb1,Cd74,Dvl1,Fgg,Gnas,ENSRNOP00000047118,Agrn,Lcp2,Apoe,Atp6ap1,Prlr,Aaed1,Ccnd3	22	1164	0.36	0.0219
GO:0022603	Regulation of anatomical structure morphogenesis	Gna12,Por,Cst3,Phip,Dpysl2,Nos3,Prkcb,Sparc,Pdcl3,Epn1,Cd53,Vim,Dvl1,Coro1a,ENSRNOP00000047118,Agrn,Apoe,Ap1ar,Anxa7,Spp1,Glul,Ccr5	22	1166	0.36	0.0223
GO:0001934	Positive regulation of protein phosphorylation	Aif1,Dazap2,Rap1b,Phip,Ect2,Cd4,Gnai2,Hpx,Ccnb1,Cd74,Dvl1,Fgg,Gnas,ENSRNOP00000047118,Agrn,Lcp2,Apoe,Atp6ap1,Prlr,Aaed1,Ccnd3	21	1089	0.37	0.023
GO:0046596	Regulation of viral entry into host cell	Ifitm2,Cd4,Cd74,Ifitm1	4	36	1.13	0.023
GO:0090276	Regulation of peptide hormone secretion	Pfkl,Glud1,Rbp4,Fgg,Slc24a6,Cdk16,Birc5,Glul,Kcnb1	9	253	0.63	0.0233
GO:0006874	Cellular calcium ion homeostasis	Cxcl1,Vapb,Prkcb,Tgm2,Cd4,Letm1,Slc24a6,Smad3,Apoe,Grina,Anxa7,Spp1,Ccr5	13	500	0.5	0.0235
GO:0040012	Regulation of locomotion	Aif1,Gna12,Col3a1,Col1a1,Arhgdib,Nos3,Furin,Sparc,Gnai2,Plg,Vim,Cd74,Coro1a,Slc24a6,Smad3,ENSRNOP00000047118,Agrn,Apoe,Ap1ar,Glul,Ccr5	21	1094	0.37	0.0237
GO:0045071	Negative regulation of viral genome replication	Vapb,Ifitm2,Ifitm1,Plscr1,Slpi	5	68	0.95	0.0237
GO:0002429	Immune response-activating cell surface receptor signaling pathway	Arpc4,Prkcb,Nfam1,Fcer1g,Lcp2,Ptpn6,Igg-2a,Ube2n	8	203	0.68	0.0248
GO:0022604	Regulation of cell morphogenesis	Gna12,Phip,Dpysl2,Sparc,Vim,Dvl1,Coro1a,ENSRNOP00000047118,Agrn,Apoe,Ap1ar,Anxa7,Spp1,Ccr5	14	573	0.47	0.0248
GO:0050801	Ion homeostasis	Alas2,Cxcl1,Vapb,Prkcb,Tgm2,Cd4,Letm1,Hpx,Gnas,Slc24a6,Smad3,Gpam,Apoe,Atp6ap1,Grina,Anxa7,Spp1,Ccr5	18	865	0.4	0.0248
GO:0043393	Regulation of protein binding	Ran,Aurkb,Mark3,Dvl1,Agrn,Apoe,Plscr1,Lox,Slpi	9	258	0.63	0.0253
GO:0061045	Negative regulation of wound healing	Plg,Fgg,Smad3,Apoe,Pros1	5	70	0.94	0.0256
GO:0030198	Extracellular matrix organization	Col3a1,Col1a1,Lum,Hsd17b12,Col1a2,Plg,Ctss,Ccdc80,Lox	9	259	0.62	0.0257
GO:0014805	Smooth muscle adaptation	Nos3,Cyba	2	2	2.08	0.0262
GO:0099093	Calcium export from the mitochondrion	Letm1,Slc24a6	2	2	2.08	0.0262
GO:0042730	Fibrinolysis	Plg,Fgg,Pros1	3	15	1.38	0.0264
GO:0051988	Regulation of attachment of spindle microtubules to kinetochore	Aurkb,Ect2,Ccnb1	3	15	1.38	0.0264
GO:0008284	Positive regulation of cell population proliferation	Cdk1,Aif1,Cxcl1,Cst3,Phip,Cyba,Pdcl3,Mvd,Tgm2,Cd4,Gnai2,Vim,Ccnb1,Cd74,Coro1a,Gnas,Tspan31,Gpam,Ptpn6,Ccnd3,Glul	21	1111	0.36	0.0265
GO:0042060	Wound healing	Col3a1,Col1a1,S100a8,Sparc,Plg,Fgg,Gnas,Ptpn6,Pros1,Lox	10	320	0.58	0.0265
GO:0051983	Regulation of chromosome segregation	Pttg1,Aurkb,Ect2,Ccnb1,Mki67,Birc5	6	111	0.82	0.0265
GO:1903706	Regulation of hemopoiesis	Cxcl1,Adrm1,Lmo2,RGD1309676,Fgl2,Cd4,Cd74,Nfam1,Gnas,Atp6ap1,Ptpn6,Lox	12	445	0.51	0.0265
GO:0050708	Regulation of protein secretion	Pfkl,Glud1,Rbp4,Fgg,Slc24a6,Gpam,Apoe,Cdk16,Birc5,Glul,Kcnb1	11	383	0.54	0.0271
GO:0043269	Regulation of ion transport	Cxcl1,Dpysl2,Nos3,Prkcb,Cyba,Cd4,Gnai2,Coro1a,Fxyd5,Ctss,Gnas,Slc24a6,Agrn,Apoe,Ptpn6,Rgs7,Kcnb1	17	802	0.41	0.0272
GO:0072593	Reactive oxygen species metabolic process	Por,Nos3,Cyba,ND2,Hbb,Apoa4	6	112	0.81	0.0272
GO:1901565	Organonitrogen compound catabolic process	Rnf115,Psmb8,Psmb9,Ambp,Ubl7,Adrm1,Tnfaip1,Nos3,Glud1,Rnf111,Hyal3,Plg,Napsa,Bckdha,Ctss,Comt,ENSRNOP00000047118,Apoe,Ece1,Ube2n	20	1035	0.37	0.0272
GO:0060627	Regulation of vesicle-mediated transport	C4bpa,Rap1b,Prkcb,Cyba,Hyal3,Gnai2,Dvl1,Coro1a,Fgg,Fcer1g,Apoe,Atp6ap1,Scarb1,Pros1,Kcnb1	15	659	0.44	0.0287
GO:0060548	Negative regulation of cell death	Cdk1,Aif1,Por,Alb,Cst3,Aurkb,Fabp1,Oxr1,Phip,Gnai2,Cd74,Coro1a,Fgg,Fcer1g,Smad3,Gpam,Apoe,Grina,Prlr,Pea15,Birc5,Ccr5	22	1205	0.34	0.0293
GO:0065003	Protein-containing complex assembly	Cdk1,Aif1,Pfkl,Fkbp4,Nup210,Adrm1,Arpc4,Tnfaip1,Col1a2,Cyba,Ect2,Letm1,Ccnb1,Cd74,Fgg,Rpl23a,Smad3,Cbr4,Apoe,Prlr,Ubn1,Apoa4,Kcnb1	23	1288	0.33	0.0293
GO:2000145	Regulation of cell motility	Aif1,Gna12,Col3a1,Col1a1,Arhgdib,Nos3,Furin,Sparc,Gnai2,Plg,Vim,Cd74,Coro1a,Slc24a6,Smad3,ENSRNOP00000047118,Apoe,Ap1ar,Glul,Ccr5	20	1045	0.36	0.0299
GO:0050776	Regulation of immune response	Col3a1,C4bpa,Arpc4,Prkcb,C1qb,Fgl2,Cd4,Hpx,Cd74,Nfam1,Fcer1g,Smad3,Lcp2,Apoe,Plscr1,Ptpn6,Igg-2a,Ube2n	18	889	0.39	0.0303
GO:0006909	Phagocytosis	Aif1,Arpc4,Tgm2,Rab14,Coro1a,Pld4,Fcer1g,Scarb1,Igg-2a	9	269	0.61	0.0304
GO:0009966	Regulation of signal transduction	Rnf115,Gna12,Por,Col3a1,Col1a1,Arhgdib,Rap1b,Adrm1,Phip,Tnfaip1,Mark3,S100a8,Furin,Prkcb,Ywhab,Cyba,Rnf111,Tgm2,Rgs14,Cd4,Fam92a1,Gnai2,Hpx,Cd74,Dvl1,Nfam1,Fgg,Gnas,Smad3,Agrn,Apoe,Atp6ap1,Plscr1,Grina,Prlr,Ptpn6,Aaed1,Ece1,Rgs7,Ccnd3,Pea15,Ube2n,Lox	43	3130	0.22	0.0312
GO:0009746	Response to hexose	Pfkl,Nos3,Prkcb,Cyba,Gpam,Ccnd3,Glul,Kcnb1	8	215	0.65	0.0314
GO:0000302	Response to reactive oxygen species	Cdk1,Col1a1,Cst3,Fabp1,Nos3,Ect2,Eef2,Hbb,Apoa4	9	272	0.6	0.0322
GO:0001775	Cell activation	Aif1,Cst3,Prkcb,Fgl2,Cd4,Cd74,Coro1a,Nfam1,Fgg,Gnas,Fcer1g,Smad3,Lcp2,Ptpn6,Ccnd3	15	670	0.43	0.0324
GO:0050792	Regulation of viral process	Vapb,Ifitm2,Cd4,Cd74,Ifitm1,Apoe,Plscr1,Slpi	8	219	0.65	0.0348
GO:0030334	Regulation of cell migration	Aif1,Gna12,Col3a1,Col1a1,Arhgdib,Nos3,Furin,Sparc,Gnai2,Plg,Vim,Cd74,Coro1a,Slc24a6,Smad3,ENSRNOP00000047118,Apoe,Glul,Ccr5	19	982	0.37	0.035
GO:0048678	Response to axon injury	Cdk1,Aif1,Cst3,Nos3,Apoe	5	78	0.89	0.0356
GO:0043933	Protein-containing complex subunit organization	Cdk1,Aif1,Pfkl,Fkbp4,Nup210,Adrm1,Arpc4,Tnfaip1,Col1a2,Cyba,Ect2,Letm1,Epg5,Ccnb1,Cd74,Fgg,Rpl23a,Smad3,Cbr4,Apoe,Prlr,Ubn1,Scarb1,Apoa4,Kcnb1	25	1483	0.31	0.0357
GO:0010959	Regulation of metal ion transport	Cxcl1,Nos3,Cyba,Cd4,Gnai2,Coro1a,Fxyd5,Gnas,Slc24a6,Agrn,Ptpn6,Rgs7	12	467	0.49	0.036
GO:0002253	Activation of immune response	C4bpa,Arpc4,Prkcb,C1qb,Nfam1,Fcer1g,Lcp2,Ptpn6,Igg-2a,Ube2n	10	338	0.55	0.0361
GO:1903900	Regulation of viral life cycle	Vapb,Ifitm2,Cd4,Cd74,Ifitm1,Plscr1,Slpi	7	169	0.7	0.0367
GO:0034599	Cellular response to oxidative stress	Cdk1,Aif1,Cst3,Fabp1,Oxr1,Nos3,Ect2,Coq7,Apoa4	9	279	0.59	0.0368
GO:0051223	Regulation of protein transport	Cdk1,Ran,Pfkl,Glud1,Ect2,Rbp4,Nucb1,Fgg,Slc24a6,Gpam,Apoe,Cdk16,Birc5,Glul,Kcnb1	15	681	0.43	0.0368
GO:0098801	Regulation of renal system process	Cyba,Gnai2,Gnas,Comt	4	44	1.04	0.0368
GO:0014738	Regulation of muscle hyperplasia	Aif1,Nos3	2	3	1.91	0.0371
GO:0042542	Response to hydrogen peroxide	Cdk1,Col1a1,Cst3,Fabp1,Ect2,Eef2,Hbb	7	171	0.7	0.0381
GO:0071407	Cellular response to organic cyclic compound	Aif1,Ran,Gna12,Col1a1,Fkbp4,Rap1b,Nos3,Cyba,Epg5,Ccnb1,Gnas,ND3,Apoe,Spp1,Cebpa	15	685	0.42	0.0381
GO:0001666	Response to hypoxia	Alas2,Cst3,Fabp1,Serpina1,Nos3,Prkcb,Cyba,Ccnb1,Smad3,CYTB,Ece1	11	407	0.51	0.0387
GO:0030193	Regulation of blood coagulation	Plg,Fgg,Fcer1g,Apoe,Pros1	5	81	0.87	0.0394
GO:0046686	Response to cadmium ion	Cdk1,Sparc,CYTB,Gpam,Ece1	5	81	0.87	0.0394
GO:0045595	Regulation of cell differentiation	Por,Col3a1,Col1a1,Fkbp4,Adrm1,Lmo2,Dpysl2,Mapk6,RGD1309676,Fgl2,Ect2,Ctdsp1,Rgs14,Cd4,Cd53,Vim,Cd74,Dvl1,Nfam1,Gnas,Smad3,Agrn,Apoe,Ap1ar,Atp6ap1,Prlr,Ptpn6,Spp1,Cebpa,Lox,Ccr5	31	2037	0.27	0.0397
GO:0080134	Regulation of response to stress	Cxcl1,Oxr1,S100a8,Fgl2,Cyba,Tgm2,Letm1,Plg,Hpx,Cd74,Ctss,Pld4,Fgg,Fcer1g,Smad3,Hbb,Apoe,Plscr1,Grina,Spp1,Cebpa,Pros1,Ube2n,Ccr5	24	1415	0.31	0.0397
GO:0051051	Negative regulation of transport	Pfkl,Rap1b,Nos3,Prkcb,Gnai2,Cd74,Coro1a,Gnas,Comt,Agrn,Apoe,Pea15,Kcnb1	13	546	0.46	0.0401
GO:0019048	Modulation by virus of host process	Vapb,Cd4,Ccr5	3	19	1.28	0.0402
GO:0033194	Response to hydroperoxide	Aif1,Oxr1,Apoa4	3	19	1.28	0.0402
GO:0017157	Regulation of exocytosis	Rap1b,Prkcb,Hyal3,Gnai2,Dvl1,Fgg,Fcer1g,Atp6ap1,Kcnb1	9	286	0.58	0.0407
GO:0071495	Cellular response to endogenous stimulus	Aif1,Ran,Gna12,Por,Col3a1,Col1a1,Fkbp4,Rap1b,Phip,Lmo2,Nos3,Col1a2,Cyba,Vim,Rab14,Coro1a,Dync1li2,Gnas,Smad3,ND3,Eef2,Gpam,Prlr	23	1338	0.32	0.042
GO:0048638	Regulation of developmental growth	Cdk1,Por,Dpysl2,Rbp4,Ccnb1,Gnas,Gpam,Agrn,Apoe,Spp1,Ccr5	11	414	0.51	0.0423
GO:0050778	Positive regulation of immune response	C4bpa,Arpc4,Prkcb,C1qb,Cd4,Hpx,Cd74,Nfam1,Fcer1g,Lcp2,Plscr1,Ptpn6,Igg-2a,Ube2n	14	623	0.43	0.0424
GO:0010288	Response to lead ion	Alas2,Serpina1,Nos3,Sparc	4	47	1.01	0.0425
GO:0030195	Negative regulation of blood coagulation	Plg,Fgg,Apoe,Pros1	4	47	1.01	0.0425
GO:0031347	Regulation of defense response	Cxcl1,S100a8,Fgl2,Cyba,Tgm2,Hpx,Ctss,Pld4,Fcer1g,Smad3,Apoe,Plscr1,Cebpa,Ccr5	14	624	0.43	0.0426
GO:0002520	Immune system development	Alas2,Psmb9,Adrm1,Lmo2,Cd4,Cd74,Coro1a,Nfam1,Pld4,Fcer1g,Smad3,Eef2,Hbb,Plscr1,Ptpn6,Cebpa	16	774	0.4	0.0428
GO:1901990	Regulation of mitotic cell cycle phase transition	Cdk1,Aif1,Aurkb,Rbl2,Ctdsp1,Ccnb1,Ptpn6,Ccnd3,Birc5	9	291	0.57	0.0442
GO:0022904	Respiratory electron transport chain	Ndufv3,Lyrm5,Coq7,ND2,CYTB	5	85	0.85	0.0448
GO:0045931	Positive regulation of mitotic cell cycle	Cdk1,Aif1,Aurkb,Phip,Ccnb1,Ccnd3,Birc5	7	179	0.68	0.0448
GO:0062013	Positive regulation of small molecule metabolic process	Por,Fabp1,Nos3,Cd74,Comt,Aaed1,Apoa4	7	179	0.68	0.0448
GO:0007599	Hemostasis	Plg,Fgg,Gnas,Anxa7,Ptpn6,Pros1	6	131	0.74	0.047
GO:0017158	Regulation of calcium ion-dependent exocytosis	Rap1b,Hyal3,Gnai2,Kcnb1	4	49	0.99	0.047
GO:0033280	Response to vitamin d	Prkcb,Cd4,Vim,Spp1	4	49	0.99	0.047
GO:0002526	Acute inflammatory response	Cxcl1,Serpina1,S100a8,Plscr1,Cebpa	5	87	0.84	0.0474
GO:0050865	Regulation of cell activation	Aif1,Adrm1,Fgl2,Cd4,Cd74,Coro1a,Nfam1,Fgg,Fcer1g,Gpam,Apoe,Plscr1,Ptpn6,Igg-2a,Cebpa	15	709	0.41	0.0474
GO:0060341	Regulation of cellular localization	Cdk1,Ran,Rhot1,Aurkb,Rap1b,Prkcb,Cyba,Ect2,Cd4,Letm1,Dvl1,Coro1a,Nucb1,Slc24a6,Fcer1g,Ptpn6,Cdk16,Birc5,Glul,Kcnb1,Ccr5	21	1188	0.33	0.0474
GO:0071636	Positive regulation of transforming growth factor beta production	Lum,Furin,Smad3	3	21	1.24	0.0474
GO:0044248	Cellular catabolic process	Rnf115,Psmb8,Psmb9,Acads,Por,Ugt2b15,Ubl7,Adrm1,Tnfaip1,Nos3,Glud1,Dap,S100a8,Rnf111,Hyal3,Epg5,Plg,Bckdha,Ctss,Comt,ENSRNOP00000047118,Hbb,Anxa7,Papd5,Ece1,Ube2n,Apoa4	27	1712	0.28	0.048
GO:0031401	Positive regulation of protein modification process	Aif1,Dazap2,Rap1b,Phip,Rnf111,Ect2,Cd4,Gnai2,Hpx,Ccnb1,Cd74,Dvl1,Fgg,Gnas,ENSRNOP00000047118,Agrn,Lcp2,Apoe,Atp6ap1,Prlr,Aaed1,Ccnd3,Ube2n	23	1362	0.31	0.0484
GO:0090207	Regulation of triglyceride metabolic process	Gpam,Apoe,Scarb1,Apoa4	4	50	0.99	0.0484
GO:0010951	Negative regulation of endopeptidase activity	Por,Pttg1,Cst3,Fabp1,Ambp,Serpina1,Furin,Birc5,Slpi	9	298	0.56	0.0485
GO:0051048	Negative regulation of secretion	Pfkl,Rap1b,Gnai2,Cd74,Gnas,Comt,Apoe,Kcnb1	8	239	0.61	0.0486
GO:0044403	Symbiotic process	Vapb,Furin,Pdcl3,Hyal3,Cd4,Plg,Apoe,Scarb1,Ccr5	9	299	0.56	0.0491
GO:0065009	Regulation of molecular function	Psmb8,Psmb9,Ring1,Ran,Pcolce,Por,Cxcl1,Nfia,Pttg1,Dazap2,Cst3,Arhgdib,Aurkb,Fabp1,Ambp,Adrm1,Serpina1,Lmo2,Depdc1,Nos3,Mark3,Dap,S100a8,Furin,Prkcb,Ywhab,Rbl2,Cyba,Ect2,Ccna2,Rgs14,Cd4,Ttr,Gnai2,Ccnb1,Cd74,RGD1303130,Dvl1,Nucb1,Fxyd5,Ctss,Nfam1,Gnas,Smad3,Agrn,Lcp2,Apoe,Plscr1,Prlr,Ptpn6,Scarb1,Spp1,Cebpa,Rgs7,Ccnd3,Ube2n,Lox,Apoa4,Birc5,Slpi	60	4992	0.16	0.0492
GO:0005319	Lipid transporter activity	Fabp1,Slco2a1,Rbp4,Atp8b1,Apoe,Plscr1,Scarb1,Apoa4	8	149	0.81	0.0157
GO:0097367	Carbohydrate derivative binding	Cdk1,Ran,Acads,Pfkl,Gna12,Pcolce,Por,Abcc5,Rhot1,Aurkb,Fkbp4,Rap1b,Hsd17b12,Mapk6,Nos3,Glud1,Mark3,Prkcb,Mvd,Tgm2,Gnai2,Rab14,Ctss,Dync1li2,Gnas,Atp8b1,Mki67,Eef2,Agrn,Apoe,Atp6ap1,Dgkh,Ccdc80,Cdk16,Scarb1,Ube2n,Glul	37	2423	0.27	0.0394
rno01100	Metabolic pathways	Acads,Pfkl,Ugt2b15,Hsd17b12,Nos3,Dpagt1,Glud1,Cmbl,Mvd,Psat1,Idh1,Hyal3,Tkt,Coq7,Ahcyl2,Bckdha,Selenbp1,Pld4,Tst,ND3,Comt,ND2,CYTB,Gpam,Atp6ap1,Dgkh,Glul	27	1450	0.35	0.0074
rno01230	Biosynthesis of amino acids	Pfkl,Psat1,Idh1,Tkt,Glul	5	71	0.93	0.0178

## Sheet: GSE13269_4 weeks
#term ID	term description		matching proteins in your network (labels)	observed gene count	background gene count	strength	false discovery rate
GO:0003012	Muscle system process		Cav3,Fkbp1a,Myl1,Tpm4,Tpm2,Actn3,Myl9,Aldoa,Cacna2d1,rCG_42402,Myh4,Tnnt3,Dlg1,ENSRNOP00000067246,Tnni2,Mef2c	16	293	0.82	1.05e-05
GO:0050896	Response to stimulus		Cd24,Arpc1b,Col6a1,Col6a2,Pcolce,Zak,St3gal6,Mfap4,Pgk1,Spag9,Serpinf1,Asb11,Itgb1bp2,Col3a1,Col5a2,Cd55,Dnajb9,Eno3,Elk3,Lum,Pxdn,Cd48,Sos2,Actr2,Ubxn2a,Strn3,Mgp,Cav3,Sec61b,Cav1,Casq1,Psme4,Plin2,Mnat1,Cul5,Ywhaq,Ifi27,Fkbp1a,Skil,Lgals1,Car3,Slc25a4,Ipo5,Rnf146,Col1a2,Txn1,Zfp91,Uaca,Postn,Ldha,Sparc,Arf4,Tgm2,Ctsh,Ifitm3,Sparcl1,Nol3,Sorbs1,Tab2,Slc12a2,Neu2,Cox4i1,Eno1,Dnajb2,Lamp1,Actn3,My…	109	9725	0.13	0.0067
GO:0009749	Response to glucose		Col6a2,Serpinf1,Lgals1,Rnf146,Txn1,Ldha,Kcnj11,Ensa,Mef2c	9	205	0.72	0.0121
GO:0003015	Heart process		Cav3,Cav1,Myl1,Cacna2d1,Tnnt3,Tnni2	6	104	0.84	0.0334
GO:0071333	Cellular response to glucose stimulus		Serpinf1,Lgals1,Rnf146,Txn1,Kcnj11,Mef2c	6	106	0.83	0.0351
GO:0042593	Glucose homeostasis		Serpinf1,Cav3,Lgals1,Rnf146,Txn1,Kcnj11,Fbn1,Fabp5,Mef2c	9	266	0.61	0.0458
GO:0097435	Supramolecular fiber organization		Arpc1b,Mfap4,Col3a1,Col5a2,Lum,Pxdn,Actr2,Cav3,Cav1,Casq1,Fkbp1a,Col1a2,Arpc5l,Mfap5,Tpm4,Sorbs1,Tpm2,Serpinh1,Nrap,Anxa2,Tnnt3,Dlg1,Tmsb4x,Dpt	24	515	0.75	2.59e-07
GO:0010033	Response to organic substance		Cd24,Arpc1b,Col6a1,Col6a2,Pcolce,St3gal6,Serpinf1,Col3a1,Col5a2,Dnajb9,Lum,Actr2,Ubxn2a,Strn3,Mgp,Cav3,Sec61b,Cav1,Casq1,Plin2,Fkbp1a,Skil,Lgals1,Car3,Slc25a4,Ipo5,Rnf146,Col1a2,Txn1,Postn,Ldha,Sparc,Ctsh,Ifitm3,Sorbs1,Tab2,Slc12a2,Neu2,Eno1,Dnajb2,Cd81,Kcnj11,Aldoa,Riok3,Cacna2d1,Pfkfb1,Six1,Anxa2,ND3,Ramp2,CYTB,ND1,Fbn1,Col4a1,Upf2,Kat2b,Rab12,Atf4,Anxa3,Calm1,Ensa,Rab10,Tmsb4x,ENSRNOP000000672…	65	3512	0.35	8.36e-07
GO:0030198	Extracellular matrix organization		Mfap4,Col3a1,Col5a2,Lum,Pxdn,Cav1,Col1a2,Col15a1,Postn,Serpinh1,Col6a3,Anxa2,Ramp2,Col4a1,Ccdc80,Dpt	16	259	0.87	5.27e-06
GO:0061061	Muscle structure development		Spag9,Popdc2,Itgb1bp2,Col3a1,Cav3,Cav1,Casq1,Fkbp1a,Skil,Lgals1,Nol3,Col6a3,Sypl2,Cd81,Nrap,Six1,rCG_42402,Ramp2,Myh4,Tnnt3,Ptpla,Mef2c	22	555	0.68	6.86e-06
GO:0046034	ATP metabolic process		Pgk1,Eno3,Ndufb9,Cox6c,Ldha,Cox4i1,Eno1,Cox5a,Cox6a2,Aldoa,COX1,ND2,COX2,CYTB,Atp5c1,LOC108351137,Ak1	17	326	0.8	8.92e-06
GO:0048513	Animal organ development		Cd24,Col6a1,Col6a2,Igfbp7,Popdc2,Tapt1,Serpinf1,Itgb1bp2,Col3a1,Col5a2,Dnajb9,Lum,Mgp,Cav3,Cav1,Casq1,Mnat1,C1galt1,Cul5,Fkbp1a,Skil,Lgals1,Slc25a4,Col1a2,Ldha,Sparc,Arf4,Tgm2,Ctsh,Mfap5,Tab2,Slc12a2,Ppib,Serpinh1,Cdh22,Col6a3,Actn3,Sypl2,Cd81,Nrap,Pfkfb1,Six1,Anxa2,Heca,COX1,rCG_42402,Ramp2,Mitf,COX2,CYTB,Fbn1,Col4a1,Upf2,Dlg1,Kat2b,Pvalb,Ptpla,Rb1cc1,Atf4,Anxa3,Cdkn1c,Jhdm1d,Dtnbp1,Mef2c	64	3758	0.31	1.05e-05
GO:0006091	Generation of precursor metabolites and energy		Ppp1r2,Pgk1,Eno3,Ndufb9,Cox6c,Ldha,Cox4i1,Eno1,Ppp1r3c,Cox5a,Cox6a2,Aldoa,COX1,ND2,COX2,CYTB,ND1,Atp5c1,Rb1cc1,LOC108351137	20	490	0.69	1.32e-05
GO:0006936	Muscle contraction		Cav3,Fkbp1a,Myl1,Tpm4,Tpm2,Actn3,Myl9,Aldoa,Cacna2d1,rCG_42402,Myh4,Tnnt3,Dlg1,Tnni2	14	227	0.87	1.82e-05
GO:0030199	Collagen fibril organization		Col3a1,Col5a2,Lum,Pxdn,Col1a2,Serpinh1,Anxa2,Dpt	8	50	1.28	2.93e-05
GO:0006119	Oxidative phosphorylation		Ndufb9,Cox6c,Cox4i1,Cox5a,Cox6a2,COX1,ND2,COX2,CYTB,Atp5c1	10	107	1.05	5.13e-05
GO:0048856	Anatomical structure development		Cd24,Rilpl1,Suds3,Col6a1,Col6a2,Zak,Igfbp7,Pgk1,Spag9,Popdc2,Tapt1,Serpinf1,Itgb1bp2,Col3a1,Col5a2,Dnajb9,Eno3,Elk3,Lum,Actr2,Mgp,Cav3,Trim54,Cav1,Casq1,Psme4,Mnat1,C1galt1,Cul5,Fkbp1a,Skil,Lgals1,Slc25a4,Col1a2,Postn,Ldha,Sparc,Arf4,Tgm2,Ctsh,Bzw1,Sparcl1,Mfap5,Nol3,Tab2,Slc12a2,Ppib,Serpinh1,Eno1,Cdh22,Col6a3,Actn3,Sypl2,Cd81,Nrap,Pfkfb1,Six1,Anxa2,Heca,COX1,Golga4,rCG_42402,Ramp2,Mitf,Myh4,COX…	85	6089	0.23	6.57e-05
GO:0015980	Energy derivation by oxidation of organic compounds		Ppp1r2,Ndufb9,Ldha,Cox4i1,Ppp1r3c,Cox5a,Cox6a2,COX1,ND2,COX2,CYTB,ND1,Rb1cc1	13	219	0.85	6.62e-05
GO:0032502	Developmental process		Cd24,Rilpl1,Suds3,Col6a1,Col6a2,Zak,Igfbp7,Pgk1,Spag9,Popdc2,Tapt1,Serpinf1,Itgb1bp2,Col3a1,Col5a2,Dnajb9,Eno3,Elk3,Lum,Actr2,Mgp,Cav3,Trim54,Cav1,Casq1,Psme4,Mnat1,C1galt1,Cul5,Fkbp1a,Skil,Lgals1,Slc25a4,Col1a2,Postn,Ldha,Sparc,Arf4,Tgm2,Ctsh,Bzw1,Sparcl1,Mfap5,Nol3,Tab2,Slc12a2,Ppib,Serpinh1,Eno1,Cdh22,Col6a3,Actn3,Sypl2,Cd81,Ddx3x,Nrap,Alkbh5,Pfkfb1,Six1,Anxa2,Heca,COX1,Golga4,Adig,rCG_42402,R…	89	6549	0.21	7.45e-05
GO:1901698	Response to nitrogen compound		Col6a1,Col3a1,Col5a2,Dnajb9,Actr2,Cav3,Sec61b,Cav1,Fkbp1a,Ipo5,Col1a2,Txn1,Ldha,Sparc,Sorbs1,Dnajb2,Cd81,Kcnj11,Riok3,Cacna2d1,Pfkfb1,Six1,CYTB,Atp5c1,Fbn1,Col4a1,Kat2b,Rab12,Atf4,Calm1,Rab10,ENSRNOP00000067246,Mef2c	33	1410	0.45	7.45e-05
GO:0090257	Regulation of muscle system process		Cav3,Cav1,Casq1,Slc25a4,Nol3,Eno1,Actn3,Myl9,Tnnt3,Dlg1,Calm1,ENSRNOP00000067246,Tnni2,Mef2c	14	268	0.8	7.62e-05
GO:0042773	ATP synthesis coupled electron transport		Ndufb9,Cox4i1,Cox5a,Cox6a2,COX1,ND2,COX2,CYTB	8	65	1.17	0.00011
GO:0009719	Response to endogenous stimulus		Cd24,Arpc1b,Col6a1,Serpinf1,Col3a1,Col5a2,Actr2,Mgp,Cav3,Cav1,Skil,Ipo5,Col1a2,Txn1,Postn,Ldha,Sparc,Ctsh,Sorbs1,Cd81,Aldoa,Cacna2d1,Pfkfb1,Six1,Anxa2,ND3,Ramp2,CYTB,Fbn1,Col4a1,Kat2b,Rab12,Atf4,Anxa3,Rab10,ENSRNOP00000067246,Mef2c	37	1761	0.4	0.00012
GO:0010243	Response to organonitrogen compound		Col6a1,Col3a1,Col5a2,Dnajb9,Actr2,Cav3,Sec61b,Cav1,Fkbp1a,Ipo5,Col1a2,Txn1,Ldha,Sparc,Sorbs1,Dnajb2,Cd81,Kcnj11,Cacna2d1,Pfkfb1,Six1,CYTB,Fbn1,Col4a1,Kat2b,Rab12,Atf4,Calm1,Rab10,ENSRNOP00000067246,Mef2c	31	1313	0.45	0.00012
GO:0001501	Skeletal system development		Col6a1,Col6a2,Tapt1,Col3a1,Col5a2,Lum,Mgp,Col1a2,Sparc,Ppib,Serpinh1,Col6a3,Actn3,Six1,Anxa2,Fbn1,Dlg1,Cdkn1c,Mef2c	19	541	0.63	0.00013
GO:0006950	Response to stress		Cd24,Zak,Pgk1,Spag9,Col3a1,Cd55,Dnajb9,Elk3,Pxdn,Actr2,Cav3,Sec61b,Cav1,Casq1,Psme4,Mnat1,Cul5,Ifi27,Lgals1,Car3,Rnf146,Txn1,Uaca,Postn,Ldha,Sparc,Arf4,Ifitm3,Nol3,Sorbs1,Slc12a2,Eno1,Dnajb2,Myl9,Cd81,Kcnj11,Aldoa,Riok3,Alkbh5,Pfkfb1,COX1,Arpp21,ND3,Ramp2,Rexo4,COX2,CYTB,ND1,Atp5c1,Vezf1,Upf2,Rab12,Atf4,Anxa3,Fbxo31,Fabp5,Dtnbp1,ENSRNOP00000067246,Mef2c	59	3683	0.29	0.00015
GO:0048731	System development		Cd24,Col6a1,Col6a2,Igfbp7,Spag9,Popdc2,Tapt1,Serpinf1,Itgb1bp2,Col3a1,Col5a2,Dnajb9,Elk3,Lum,Actr2,Mgp,Cav3,Cav1,Casq1,Mnat1,C1galt1,Cul5,Fkbp1a,Skil,Lgals1,Slc25a4,Col1a2,Postn,Ldha,Sparc,Arf4,Tgm2,Ctsh,Bzw1,Mfap5,Tab2,Slc12a2,Ppib,Serpinh1,Cdh22,Col6a3,Actn3,Sypl2,Cd81,Nrap,Pfkfb1,Six1,Anxa2,Heca,COX1,Golga4,rCG_42402,Ramp2,Mitf,COX2,CYTB,Vezf1,Fbn1,Col4a1,Upf2,Dlg1,Kat2b,Pvalb,Ptpla,Rb1cc1,Atf…	73	5030	0.24	0.00015
GO:0006937	Regulation of muscle contraction		Cav3,Cav1,Casq1,Eno1,Actn3,Myl9,Tnnt3,Dlg1,Calm1,ENSRNOP00000067246,Tnni2	11	170	0.89	0.00018
GO:1901700	Response to oxygen-containing compound		Arpc1b,Col6a1,Col6a2,Serpinf1,Col3a1,Col5a2,Actr2,Strn3,Cav1,Lgals1,Car3,Ipo5,Rnf146,Col1a2,Txn1,Postn,Ldha,Sparc,Ctsh,Sorbs1,Tab2,Neu2,Kcnj11,Aldoa,Cacna2d1,Pfkfb1,Six1,Ramp2,CYTB,ND1,Atp5c1,Fbn1,Col4a1,Kat2b,Rab12,Atf4,Ensa,Rab10,ENSRNOP00000067246,Mef2c	40	2048	0.37	0.00018
GO:0048518	Positive regulation of biological process		Cd24,Nek7,Rabgef1,Arpc1b,Suds3,Sumo3,Pcolce,Zak,Pgk1,Tfb2m,Spag9,Tapt1,Serpinf1,Asb11,Col3a1,Cd55,Elk3,Lum,Sos2,Actr2,Strn3,Cav3,Cav1,Casq1,Psme4,Plin2,Mnat1,Faf1,Fkbp1a,Pabpc1,Skil,Lgals1,Slc25a4,Ipo5,Rnf146,Txn1,Zfp91,Uaca,Postn,Ldha,Sparc,Arf4,Tgm2,Ctsh,Arpc5l,Sorbs1,Tab2,Slc12a2,Neu2,Ppib,Eno1,Dnajb2,Lamp1,Actn3,Cd81,Kcnj11,Aldoa,Riok3,Pkn2,Cacna2d1,Pfkfb1,Six1,Anxa2,Gpbp1,Golga4,Adig,Ramp2,M…	89	6791	0.2	0.00025
GO:0007275	Multicellular organism development		Cd24,Suds3,Col6a1,Col6a2,Zak,Igfbp7,Spag9,Popdc2,Tapt1,Serpinf1,Itgb1bp2,Col3a1,Col5a2,Dnajb9,Elk3,Lum,Actr2,Mgp,Cav3,Trim54,Cav1,Casq1,Psme4,Mnat1,C1galt1,Cul5,Fkbp1a,Skil,Lgals1,Slc25a4,Col1a2,Postn,Ldha,Sparc,Arf4,Tgm2,Ctsh,Bzw1,Mfap5,Tab2,Slc12a2,Ppib,Serpinh1,Eno1,Cdh22,Col6a3,Actn3,Sypl2,Cd81,Nrap,Pfkfb1,Six1,Anxa2,Heca,COX1,Golga4,rCG_42402,Ramp2,Mitf,COX2,CYTB,Vezf1,Fbn1,Col4a1,Upf2,Dlg1,…	78	5716	0.22	0.00046
GO:0042775	Mitochondrial atp synthesis coupled electron transport		Ndufb9,Cox4i1,Cox5a,Cox6a2,COX1,ND2,CYTB	7	60	1.15	0.00059
GO:0006942	Regulation of striated muscle contraction		Cav3,Cav1,Casq1,Actn3,Tnnt3,Dlg1,Calm1,ENSRNOP00000067246	8	94	1.01	0.0009
GO:0048522	Positive regulation of cellular process		Cd24,Nek7,Arpc1b,Suds3,Sumo3,Pcolce,Zak,Pgk1,Tfb2m,Spag9,Tapt1,Serpinf1,Col3a1,Elk3,Lum,Sos2,Actr2,Strn3,Cav3,Cav1,Casq1,Psme4,Mnat1,Faf1,Fkbp1a,Pabpc1,Skil,Lgals1,Slc25a4,Ipo5,Rnf146,Txn1,Zfp91,Uaca,Postn,Ldha,Sparc,Arf4,Tgm2,Ctsh,Arpc5l,Sorbs1,Tab2,Slc12a2,Neu2,Eno1,Dnajb2,Lamp1,Actn3,Cd81,Kcnj11,Aldoa,Pkn2,Cacna2d1,Pfkfb1,Six1,Anxa2,Gpbp1,Golga4,Adig,Ramp2,Mitf,COX2,Vezf1,Fbn1,Dlg1,Ccdc80,Kat2…	82	6252	0.2	0.0009
GO:0009628	Response to abiotic stimulus		Cd24,Zak,Mfap4,Pgk1,Serpinf1,Col3a1,Mgp,Cav3,Cav1,Casq1,Cul5,Rnf146,Txn1,Uaca,Postn,Ldha,Sparc,Nol3,Slc12a2,Eno1,Aldoa,Alkbh5,COX1,Arpp21,ND3,Ramp2,Myh4,COX2,CYTB,Atf4	30	1428	0.4	0.0013
GO:0022900	Electron transport chain		Ndufb9,Cox6c,Cox4i1,Cox5a,Cox6a2,COX1,ND2,COX2,CYTB	9	135	0.9	0.0013
GO:0045333	Cellular respiration		Ndufb9,Cox4i1,Cox5a,Cox6a2,COX1,ND2,COX2,CYTB,ND1	9	147	0.87	0.0023
GO:0019725	Cellular homeostasis		Cd24,Serpinf1,Cav3,Cav1,Casq1,Cul5,Fkbp1a,Lgals1,Rnf146,Txn1,Tgm2,Nol3,Slc12a2,Sypl2,Kcnj11,Aldoa,Tmx4,Cacna2d1,Fth1,Atf4,Calm1,ENSRNOP00000067246,Mef2c	23	968	0.46	0.0028
GO:0022898	Regulation of transmembrane transporter activity		Cav3,Cav1,Casq1,Fkbp1a,Slc25a4,Kcnj11,Cacna2d1,Dlg1,Calm1,Tmsb4x,ENSRNOP00000067246,Mef2c	12	291	0.7	0.0031
GO:0055082	Cellular chemical homeostasis		Cd24,Serpinf1,Cav3,Cav1,Casq1,Cul5,Fkbp1a,Lgals1,Rnf146,Txn1,Tgm2,Nol3,Slc12a2,Sypl2,Kcnj11,Cacna2d1,Fth1,Atf4,Calm1,ENSRNOP00000067246,Mef2c	21	843	0.48	0.0034
GO:0042692	Muscle cell differentiation		Spag9,Popdc2,Cav3,Casq1,Sypl2,Cd81,Nrap,Six1,Ramp2,Tnnt3,Ptpla,Mef2c	12	298	0.69	0.0037
GO:0065008	Regulation of biological quality		Cd24,Nek7,Tubb5,Arpc1b,Popdc2,Tapt1,Serpinf1,Sos2,Actr2,Cav3,Cav1,Casq1,Plin2,Cul5,Faf1,Fkbp1a,Skil,Lgals1,Slc25a4,Rnf146,Col1a2,Txn1,Postn,Sparc,Arf4,Tgm2,Ctsh,Arpc5l,Sparcl1,Nol3,Sorbs1,Slc12a2,Ppib,Lamp1,Actn3,Sypl2,Myl9,Cd81,Kcnj11,Aldoa,Tmx4,Alkbh5,Cacna2d1,Six1,Fth1,Anxa2,Golga4,Ramp2,COX2,Pnpla8,Fbn1,Dlg1,Kat2b,Rb1cc1,Atf4,Calm1,Ensa,LOC108351137,Fabp5,Tmsb4x,Dtnbp1,ENSRNOP00000067246,Mef2c	63	4532	0.22	0.0037
GO:0072359	Circulatory system development		Popdc2,Col3a1,Elk3,Cav3,Cav1,Mnat1,C1galt1,Fkbp1a,Slc25a4,Col1a2,Sparc,Tab2,Sypl2,Nrap,Six1,Anxa2,Ramp2,Vezf1,Fbn1,Col4a1,Kat2b,Rb1cc1,Mef2c	23	993	0.45	0.0037
GO:1902600	Proton transmembrane transport		Cox6c,Cox4i1,Cox5a,Cox6a2,COX1,COX2,CYTB,Atp5c1,ENSRNOP00000067246	9	159	0.83	0.0037
GO:0010939	Regulation of necrotic cell death		Cav1,Slc25a4,Nol3,Fth1,COX2	5	33	1.26	0.0043
GO:0051239	Regulation of multicellular organismal process		Cd24,Rabgef1,Pgk1,Spag9,Popdc2,Tapt1,Serpinf1,Col3a1,Col5a2,Lum,Sos2,Actr2,Mgp,Cav3,Cav1,Casq1,Skil,Lgals1,Slc25a4,Postn,Sparc,Ctsh,Nol3,Slc12a2,Ppib,Eno1,Actn3,Myl9,Cd81,Riok3,Cacna2d1,Six1,Anxa2,Golga4,Ramp2,Mitf,Tnnt3,Vezf1,Fbn1,Dlg1,Kat2b,Atf4,Anxa3,Fbxo31,Calm1,Fabp5,Tmsb4x,Cdkn1c,Dtnbp1,ENSRNOP00000067246,Tnni2,Mef2c	52	3488	0.25	0.0043
GO:0009888	Tissue development		Cd24,Rilpl1,Col6a1,Col6a2,Pgk1,Popdc2,Tapt1,Col3a1,Eno3,Lum,Mgp,Cav3,Cav1,Casq1,C1galt1,Fkbp1a,Skil,Col1a2,Postn,Tgm2,Ctsh,Slc12a2,Serpinh1,Col6a3,Cd81,Nrap,Six1,rCG_42402,Vezf1,Col4a1,Dlg1,Ptpla,Atf4,Rab10,Mef2c	35	1966	0.33	0.0046
GO:1901699	Cellular response to nitrogen compound		Col6a1,Col3a1,Col5a2,Actr2,Cav3,Cav1,Ipo5,Col1a2,Sorbs1,Riok3,Cacna2d1,Six1,Atp5c1,Fbn1,Col4a1,Kat2b,Rab12,Atf4,Rab10,Mef2c	20	803	0.48	0.0046
GO:0009725	Response to hormone		Cd24,Arpc1b,Serpinf1,Mgp,Cav1,Col1a2,Txn1,Ldha,Sparc,Ctsh,Sorbs1,Aldoa,Pfkfb1,Anxa2,ND3,Ramp2,CYTB,Fbn1,Kat2b,Rab12,Anxa3,Rab10,ENSRNOP00000067246,Mef2c	24	1105	0.42	0.0056
GO:0044093	Positive regulation of molecular function		Cd24,Nek7,Pcolce,Zak,Spag9,Cav1,Casq1,Psme4,Mnat1,Fkbp1a,Slc25a4,Txn1,Zfp91,Uaca,Arf4,Ctsh,Tab2,Eno1,Dnajb2,Cd81,Kcnj11,Cacna2d1,Pfkfb1,Anxa2,Ramp2,Lrrfip1,Fbn1,Dlg1,Kat2b,Anxa3,Calm1,Tmsb4x,ENSRNOP00000067246,Mef2c	34	1905	0.33	0.0056
GO:0071230	Cellular response to amino acid stimulus		Col6a1,Col3a1,Col5a2,Ipo5,Col1a2,Six1,Col4a1	7	94	0.95	0.0056
GO:0014819	Regulation of skeletal muscle contraction		Cav3,Casq1,Actn3,ENSRNOP00000067246	4	17	1.45	0.0061
GO:0042221	Response to chemical		Cd24,Arpc1b,Col6a1,Col6a2,Pcolce,St3gal6,Pgk1,Serpinf1,Col3a1,Col5a2,Dnajb9,Eno3,Lum,Pxdn,Actr2,Ubxn2a,Strn3,Mgp,Cav3,Sec61b,Cav1,Casq1,Plin2,Mnat1,Fkbp1a,Skil,Lgals1,Car3,Slc25a4,Ipo5,Rnf146,Col1a2,Txn1,Uaca,Postn,Ldha,Sparc,Ctsh,Ifitm3,Nol3,Sorbs1,Tab2,Slc12a2,Neu2,Cox4i1,Eno1,Dnajb2,Cd81,Kcnj11,Aldoa,Riok3,Cacna2d1,Pfkfb1,Six1,Anxa2,COX1,ND3,Ramp2,CYTB,ND1,Atp5c1,Fbn1,Col4a1,Upf2,Kat2b,Rab12,A…	74	5773	0.19	0.0061
GO:1904062	Regulation of cation transmembrane transport		Cav3,Cav1,Casq1,Fkbp1a,Slc25a4,Nol3,Kcnj11,Cacna2d1,Dlg1,Calm1,Tmsb4x,ENSRNOP00000067246,Mef2c	13	379	0.62	0.0061
GO:0016310	Phosphorylation		Nek7,Zak,Pgk1,Spag9,Eno3,Mnat1,Ndufb9,Cox6c,Ctsh,Cox4i1,Eno1,Cox5a,Cox6a2,Aldoa,Riok3,Pkn2,Pfkfb1,COX1,ND2,COX2,CYTB,Atp5c1,Socs6,LOC108351137,Ak1,Mef2c	26	1284	0.39	0.007
GO:0032412	Regulation of ion transmembrane transporter activity		Cav3,Cav1,Casq1,Fkbp1a,Kcnj11,Cacna2d1,Dlg1,Calm1,Tmsb4x,ENSRNOP00000067246,Mef2c	11	279	0.68	0.0072
GO:0051235	Maintenance of location		Tapt1,Cav1,Plin2,Faf1,Txn1,Fth1,Fbn1,Tmsb4x,ENSRNOP00000067246	9	182	0.77	0.0072
GO:0034284	Response to monosaccharide		Col6a2,Serpinf1,Lgals1,Rnf146,Txn1,Ldha,Sparc,Kcnj11,Ensa,Mef2c	10	231	0.72	0.0076
GO:0005975	Carbohydrate metabolic process		St3gal6,Ppp1r2,Pgk1,Eno3,Ldha,Neu2,Eno1,Ppp1r3c,Kcnj11,Aldoa,Pfkfb1,Fbn1,Rb1cc1,Atf4,LOC108351137,Fabp5	16	579	0.52	0.0081
GO:0051146	Striated muscle cell differentiation		Spag9,Popdc2,Cav3,Casq1,Cd81,Nrap,Six1,Tnnt3,Ptpla,Mef2c	10	235	0.71	0.0083
GO:0006123	Mitochondrial electron transport, cytochrome c to oxygen		Cox4i1,Cox5a,Cox6a2,COX1	4	20	1.38	0.0089
GO:0014070	Response to organic cyclic compound		Arpc1b,Serpinf1,Lum,Actr2,Strn3,Mgp,Cav1,Plin2,Fkbp1a,Lgals1,Col1a2,Txn1,Postn,Ldha,Sparc,Kcnj11,Riok3,Pfkfb1,Six1,ND3,Ramp2,CYTB,ND1,Atf4,Anxa3,Mef2c	26	1313	0.38	0.0089
GO:0070482	Response to oxygen levels		Cd24,Pgk1,Cav1,Rnf146,Txn1,Postn,Ldha,Nol3,Eno1,Aldoa,Alkbh5,Ramp2,CYTB,Atf4	14	463	0.56	0.009
GO:2001257	Regulation of cation channel activity		Cav1,Casq1,Fkbp1a,Kcnj11,Cacna2d1,Dlg1,Calm1,Tmsb4x,Mef2c	9	191	0.75	0.009
GO:0009653	Anatomical structure morphogenesis		Rilpl1,Col6a1,Col6a2,Zak,Col3a1,Col5a2,Elk3,Mgp,Cav3,Cav1,Casq1,C1galt1,Fkbp1a,Skil,Col1a2,Postn,Tgm2,Ctsh,Mfap5,Slc12a2,Serpinh1,Col6a3,Actn3,Cd81,Nrap,Six1,Anxa2,Ramp2,Tnnt3,Vezf1,Fbn1,Col4a1,Dlg1,Ptpla,Atf4,Rab10,Cdkn1c,Dtnbp1,Mef2c	39	2427	0.29	0.0093
GO:0044057	Regulation of system process		Popdc2,Cav3,Cav1,Casq1,Slc25a4,Nol3,Eno1,Actn3,Myl9,Cacna2d1,Tnnt3,Dlg1,Calm1,Fabp5,ENSRNOP00000067246,Tnni2,Mef2c	17	659	0.49	0.0093
GO:0050790	Regulation of catalytic activity		Cd24,Nek7,Cstb,Pcolce,Zak,Ppp1r2,Spag9,Serpinf1,Cd55,Cav3,Cav1,Psme4,Mnat1,Fkbp1a,Zfp91,Uaca,Arf4,Ctsh,Nol3,Tab2,Tpm2,Serpinh1,Dnajb2,Col6a3,Cox6a2,Cd81,Pfkfb1,Anxa2,Tnnt3,Fbn1,Socs6,Dlg1,Kat2b,Anxa3,Calm1,Ensa,Tmsb4x,Cdkn1c,Dtnbp1,Mef2c	40	2518	0.28	0.0093
GO:0071417	Cellular response to organonitrogen compound		Col6a1,Col3a1,Col5a2,Actr2,Cav3,Cav1,Ipo5,Col1a2,Sorbs1,Cacna2d1,Six1,Fbn1,Col4a1,Kat2b,Rab12,Atf4,Rab10,Mef2c	18	730	0.47	0.0094
GO:0048878	Chemical homeostasis		Cd24,Serpinf1,Cav3,Cav1,Casq1,Cul5,Fkbp1a,Lgals1,Rnf146,Txn1,Tgm2,Ctsh,Nol3,Slc12a2,Sypl2,Kcnj11,Cacna2d1,Fth1,Pnpla8,Fbn1,Atf4,Calm1,Fabp5,ENSRNOP00000067246,Mef2c	25	1255	0.38	0.0101
GO:0055114	Oxidation-reduction process		Ppp1r2,Pgk1,Pxdn,Ndufb9,Cox6c,Txn1,Ldha,Cox4i1,Eno1,Ppp1r3c,Cox5a,Cox6a2,Tmx4,Alkbh5,Fth1,COX1,ND3,ND2,COX2,CYTB,ND1,Rb1cc1,LOC108351137,Jhdm1d	24	1177	0.39	0.0101
GO:0080134	Regulation of response to stress		Cd24,Rabgef1,Zak,Spag9,Serpinf1,Dnajb9,Actr2,Cav3,Cav1,Skil,Rnf146,Txn1,Uaca,Tgm2,Nol3,Slc12a2,Eno1,Lamp1,Cd81,Riok3,Anxa2,Dlg1,Rb1cc1,Atf4,Tmsb4x,Dtnbp1,Mef2c	27	1415	0.36	0.0101
GO:0060547	Negative regulation of necrotic cell death		Cav1,Slc25a4,Nol3,Fth1	4	22	1.34	0.0104
GO:0043270	Positive regulation of ion transport		Cav1,Casq1,Slc25a4,Slc12a2,Kcnj11,Cacna2d1,Dlg1,Atf4,Calm1,Tmsb4x,Dtnbp1,ENSRNOP00000067246	12	358	0.61	0.0108
GO:0098903	Regulation of membrane repolarization during action potential		Cav1,Cacna2d1,Dlg1	3	7	1.71	0.011
GO:0007507	Heart development		Popdc2,Col3a1,Cav3,Mnat1,Fkbp1a,Slc25a4,Sparc,Tab2,Sypl2,Nrap,Six1,Ramp2,Fbn1,Kat2b,Rb1cc1,Mef2c	16	610	0.5	0.0113
GO:0060537	Muscle tissue development		Popdc2,Col3a1,Cav3,Cav1,Casq1,Fkbp1a,Skil,Nrap,Six1,rCG_42402,Dlg1,Mef2c	12	361	0.6	0.0113
GO:0036293	Response to decreased oxygen levels		Cd24,Pgk1,Cav1,Rnf146,Postn,Ldha,Nol3,Eno1,Aldoa,Alkbh5,Ramp2,CYTB,Atf4	13	424	0.57	0.012
GO:0071310	Cellular response to organic substance		Col6a1,Pcolce,St3gal6,Serpinf1,Col3a1,Col5a2,Actr2,Ubxn2a,Cav3,Cav1,Fkbp1a,Skil,Lgals1,Ipo5,Rnf146,Col1a2,Txn1,Postn,Sparc,Ctsh,Ifitm3,Sorbs1,Slc12a2,Eno1,Kcnj11,Riok3,Cacna2d1,Six1,ND3,Ramp2,Fbn1,Col4a1,Kat2b,Rab12,Atf4,Rab10,Tmsb4x,Mef2c	38	2385	0.28	0.012
GO:0007517	Muscle organ development		Popdc2,Itgb1bp2,Col3a1,Cav1,Casq1,Fkbp1a,Skil,Col6a3,Six1,rCG_42402,Mef2c	11	311	0.63	0.0126
GO:0019318	Hexose metabolic process		Pgk1,Ldha,Eno1,Kcnj11,Aldoa,Pfkfb1,Fbn1,Atf4,LOC108351137,Fabp5	10	260	0.67	0.0137
GO:0003433	Chondrocyte development involved in endochondral bone morphogenesis		Col6a1,Col6a2,Serpinh1,Col6a3	4	25	1.28	0.0142
GO:0031579	Membrane raft organization		Cav3,Cav1,Anxa2,Dlg1	4	25	1.28	0.0142
GO:0072659	Protein localization to plasma membrane		Rilpl1,Cav3,Cd81,Anxa2,Golga4,Ramp2,Dlg1,Rab12,Rab10	9	211	0.71	0.0142
GO:0034762	Regulation of transmembrane transport		Cav3,Cav1,Casq1,Ywhaq,Fkbp1a,Slc25a4,Nol3,Sorbs1,Kcnj11,Cacna2d1,Dlg1,Calm1,Fabp5,Tmsb4x,ENSRNOP00000067246,Mef2c	16	630	0.49	0.0144
GO:0007015	Actin filament organization		Arpc1b,Actr2,Cav3,Arpc5l,Tpm4,Sorbs1,Tpm2,Nrap,Dlg1,Tmsb4x	10	268	0.65	0.016
GO:0051641	Cellular localization		Cd24,Rabgef1,Rilpl1,Sumo3,Spag9,Tapt1,Actr2,Cav3,Sec61b,Cav1,Ywhaq,Fkbp1a,Ipo5,Txn1,Arf4,Xpo7,Nol3,Ppib,Lamp1,Cd81,Kpna3,Alkbh5,Cacna2d1,Six1,Fth1,Anxa2,Golga4,Ramp2,Atp5c1,Dlg1,Rab12,Anxa3,Calm1,Rab10,Tmsb4x,Mia3,Dtnbp1,ENSRNOP00000067246	38	2434	0.27	0.016
GO:0051098	Regulation of binding		Sumo3,Ppp1r2,Cav1,Fkbp1a,Txn1,Eno1,Dnajb2,Anxa2,Ramp2,Kat2b,Calm1,Tmsb4x,Dtnbp1	13	449	0.54	0.0181
GO:0055001	Muscle cell development		Popdc2,Cav3,Casq1,Sypl2,Nrap,Six1,Ramp2,Tnnt3	8	172	0.75	0.0181
GO:1903580	Positive regulation of atp metabolic process		Pgk1,Eno1,Actn3,COX2,Tmsb4x	5	54	1.05	0.0181
GO:0032501	Multicellular organismal process		Cd24,Suds3,Cstb,Col6a1,Col6a2,Zak,Igfbp7,Spag9,Popdc2,Tapt1,Serpinf1,Itgb1bp2,Col3a1,Col5a2,Dnajb9,Elk3,Lum,Actr2,Mgp,Cav3,Trim54,Cav1,Casq1,Psme4,Mnat1,C1galt1,Cul5,Fkbp1a,Skil,Lgals1,Slc25a4,Col1a2,Postn,Ldha,Sparc,Arf4,Myl1,Tgm2,Ctsh,Bzw1,Mfap5,Nol3,Tpm4,Tab2,Slc12a2,Tpm2,Ppib,Serpinh1,Eno1,Cdh22,Col6a3,Actn3,Sypl2,Myl9,Cd81,Kcnj11,Ddx3x,Nrap,Aldoa,Pkn2,Alkbh5,Cacna2d1,Pfkfb1,Six1,Anxa2,Heca,C…	96	8527	0.13	0.0191
GO:0010498	Proteasomal protein catabolic process		Dnajb9,Ubxn2a,Trim54,Sec61b,Psme4,Cul5,Ube2g1,Dnajb2,Socs6,Fbxl4,Fbxo31	11	335	0.6	0.0203
GO:0034765	Regulation of ion transmembrane transport		Cav3,Cav1,Casq1,Ywhaq,Fkbp1a,Slc25a4,Nol3,Kcnj11,Cacna2d1,Dlg1,Calm1,Tmsb4x,ENSRNOP00000067246,Mef2c	14	523	0.51	0.021
GO:0009611	Response to wounding		Col3a1,Elk3,Cav3,Cav1,Lgals1,Txn1,Sparc,Arf4,Nol3,Myl9,Cd81,Fabp5,Dtnbp1	13	460	0.53	0.0214
GO:0009987	Cellular process		Cd24,Nek7,Tubb5,Rabgef1,Arpc1b,Rilpl1,Suds3,Sumo3,Col6a1,Col6a2,Pcolce,Zak,St3gal6,Ppp1r2,Igfbp7,Mfap4,Pgk1,Tfb2m,Spag9,Popdc2,Tapt1,Serpinf1,Asb11,Itgb1bp2,Col3a1,Col5a2,Ttc1,Dnajb9,Eno3,Ebag9,Elk3,Lum,Pxdn,Cd48,Sos2,Actr2,Ubxn2a,Mgp,Cav3,Trim54,Sec61b,Ppia,Slc38a4,Cav1,Casq1,Psme4,Mnat1,C1galt1,Cul5,Ywhaq,Faf1,Ifi27,Nudt4,Fkbp1a,Ndufb9,Pabpc1,Skil,Ube2g1,Lgals1,Eif4b,Car3,Cox6c,Slc25a4,Ipo5,Rnf…	169	18050	0.05	0.024
GO:0001666	Response to hypoxia		Cd24,Pgk1,Cav1,Rnf146,Postn,Ldha,Nol3,Eno1,Aldoa,Alkbh5,Ramp2,CYTB	12	407	0.55	0.0248
GO:0001765	Membrane raft assembly		Cav3,Cav1,Anxa2	3	11	1.52	0.0248
GO:0031295	T cell costimulation		Cd24,Cav1,Lgals1,Cd81	4	31	1.19	0.0248
GO:0032411	Positive regulation of transporter activity		Casq1,Slc25a4,Kcnj11,Cacna2d1,Calm1,Tmsb4x,ENSRNOP00000067246	7	136	0.79	0.0248
GO:0043200	Response to amino acid		Col6a1,Col3a1,Col5a2,Ipo5,Col1a2,Txn1,Six1,Col4a1	8	184	0.72	0.0248
GO:0060348	Bone development		Col6a1,Col6a2,Sparc,Ppib,Serpinh1,Col6a3,Actn3,Anxa2,Mef2c	9	233	0.67	0.0248
GO:0060536	Cartilage morphogenesis		Col6a1,Col6a2,Col6a3,Mef2c	4	31	1.19	0.0248
GO:1901019	Regulation of calcium ion transmembrane transporter activity		Cav3,Casq1,Fkbp1a,Cacna2d1,Calm1,ENSRNOP00000067246	6	96	0.88	0.0248
GO:0009057	Macromolecule catabolic process		Dnajb9,Ubxn2a,Trim54,Sec61b,Psme4,Cul5,Pabpc1,Ube2g1,Rnf146,Ctsh,Dnajb2,Anxa2,Rexo4,Csde1,Upf2,Socs6,Fbxl4,Rab12,Rb1cc1,Fbxo31	20	972	0.39	0.0254
GO:0065009	Regulation of molecular function		Cd24,Nek7,Rabgef1,Cstb,Sumo3,Pcolce,Zak,Ppp1r2,Tfb2m,Spag9,Serpinf1,Cd55,Elk3,Sos2,Strn3,Cav3,Cav1,Casq1,Psme4,Mnat1,Faf1,Fkbp1a,Skil,Slc25a4,Txn1,Zfp91,Uaca,Arf4,Ctsh,Nol3,Tab2,Tpm2,Serpinh1,Eno1,Dnajb2,Col6a3,Cox6a2,Cd81,Kcnj11,Cacna2d1,Pfkfb1,Rfx7,Six1,Anxa2,Gpbp1,Ramp2,Mitf,Lrrfip1,Tnnt3,Vezf1,Fbn1,Socs6,Dlg1,Kat2b,Atf4,Anxa3,Calm1,Ensa,Tmsb4x,Cdkn1c,Dtnbp1,ENSRNOP00000067246,Mef2c	63	4992	0.18	0.0259
GO:0070887	Cellular response to chemical stimulus		Col6a1,Pcolce,St3gal6,Pgk1,Serpinf1,Col3a1,Col5a2,Pxdn,Actr2,Ubxn2a,Cav3,Cav1,Fkbp1a,Skil,Lgals1,Ipo5,Rnf146,Col1a2,Txn1,Uaca,Postn,Sparc,Ctsh,Ifitm3,Nol3,Sorbs1,Slc12a2,Eno1,Kcnj11,Riok3,Cacna2d1,Six1,ND3,Ramp2,Atp5c1,Fbn1,Col4a1,Kat2b,Rab12,Atf4,Rab10,Tmsb4x,Mef2c	43	3000	0.24	0.0279
GO:0030029	Actin filament-based process		Arpc1b,Actr2,Cav3,Casq1,Arpc5l,Tpm4,Sorbs1,Tpm2,Nrap,Cacna2d1,rCG_42402,Tnnt3,Dlg1,Tmsb4x,Dtnbp1	15	616	0.47	0.0285
GO:0045185	Maintenance of protein location		Tapt1,Cav1,Faf1,Txn1,Fbn1,Tmsb4x	6	100	0.86	0.0288
GO:0032879	Regulation of localization		Rabgef1,Sumo3,Spag9,Serpinf1,Col3a1,Cav3,Cav1,Casq1,Plin2,Ywhaq,Fkbp1a,Slc25a4,Ipo5,Txn1,Uaca,Postn,Sparc,Ctsh,Nol3,Sorbs1,Slc12a2,Dnajb2,Lamp1,Cd81,Kcnj11,Aldoa,Pkn2,Cacna2d1,Six1,Anxa2,Mitf,Dlg1,Rab12,Atf4,Anxa3,Fbxo31,Calm1,Ensa,Fabp5,Rab10,Tmsb4x,Dtnbp1,ENSRNOP00000067246,Mef2c	44	3105	0.23	0.029
GO:0071236	Cellular response to antibiotic		Actr2,Txn1,Rab10,Mef2c	4	34	1.15	0.0301
GO:0034613	Cellular protein localization		Cd24,Rabgef1,Rilpl1,Sumo3,Tapt1,Cav3,Sec61b,Cav1,Ywhaq,Ipo5,Txn1,Arf4,Xpo7,Lamp1,Cd81,Kpna3,Alkbh5,Six1,Anxa2,Golga4,Ramp2,Dlg1,Rab12,Calm1,Rab10,Tmsb4x,Mia3	27	1571	0.32	0.0328
GO:0060306	Regulation of membrane repolarization		Cav3,Cav1,Cacna2d1,Dlg1	4	35	1.14	0.0328
GO:0006875	Cellular metal ion homeostasis		Cd24,Cav3,Cav1,Casq1,Cul5,Fkbp1a,Tgm2,Nol3,Slc12a2,Sypl2,Cacna2d1,Fth1,Atf4,Calm1,ENSRNOP00000067246	15	631	0.46	0.0338
GO:0051216	Cartilage development		Col6a1,Col6a2,Tapt1,Lum,Mgp,Serpinh1,Col6a3,Mef2c	8	197	0.69	0.0338
GO:0098662	Inorganic cation transmembrane transport		Fkbp1a,Cox6c,Nol3,Slc12a2,Cox4i1,Cox5a,Cox6a2,Kcnj11,Cacna2d1,Anxa2,COX1,COX2,CYTB,Atp5c1,ENSRNOP00000067246	15	632	0.46	0.0341
GO:1901575	Organic substance catabolic process		Pgk1,Dnajb9,Eno3,Ubxn2a,Trim54,Sec61b,Psme4,Cul5,Nudt4,Pabpc1,Ube2g1,Rnf146,Ldha,Ctsh,Neu2,Eno1,Dnajb2,Aldoa,Anxa2,Rexo4,Pnpla8,Csde1,Upf2,Socs6,Fbxl4,Rab12,Rb1cc1,Fbxo31,LOC108351137	29	1756	0.3	0.0348
GO:0006874	Cellular calcium ion homeostasis		Cd24,Cav3,Cav1,Casq1,Cul5,Fkbp1a,Tgm2,Nol3,Sypl2,Cacna2d1,Atf4,Calm1,ENSRNOP00000067246	13	500	0.5	0.0361
GO:0051651	Maintenance of location in cell		Tapt1,Cav1,Txn1,Fth1,Tmsb4x,ENSRNOP00000067246	6	107	0.83	0.0362
GO:0006812	Cation transport		Slc38a4,Cav1,Fkbp1a,Cox6c,Nol3,Slc12a2,Cox4i1,Cox5a,Cox6a2,Kcnj11,Cacna2d1,Fth1,Anxa2,COX1,Ramp2,COX2,CYTB,Atp5c1,ENSRNOP00000067246	19	937	0.39	0.0368
GO:0071495	Cellular response to endogenous stimulus		Col6a1,Serpinf1,Col3a1,Col5a2,Actr2,Cav3,Cav1,Skil,Ipo5,Col1a2,Postn,Ctsh,Sorbs1,Cacna2d1,Six1,ND3,Ramp2,Fbn1,Col4a1,Kat2b,Rab12,Atf4,Rab10,Mef2c	24	1338	0.33	0.0368
GO:0009887	Animal organ morphogenesis		Col6a1,Col6a2,Col3a1,Col5a2,Cav3,Cav1,Fkbp1a,Col1a2,Tgm2,Ctsh,Mfap5,Slc12a2,Serpinh1,Col6a3,Actn3,Six1,Fbn1,Dlg1,Ptpla,Atf4,Mef2c	21	1099	0.36	0.0386
GO:0044265	Cellular macromolecule catabolic process		Dnajb9,Ubxn2a,Trim54,Sec61b,Psme4,Cul5,Pabpc1,Ube2g1,Rnf146,Ctsh,Dnajb2,Rexo4,Csde1,Upf2,Socs6,Fbxl4,Rab12,Fbxo31	18	865	0.4	0.0386
GO:0034118	Regulation of erythrocyte aggregation		Cd24,Lgals1	2	2	2.08	0.0394
GO:0043269	Regulation of ion transport		Cav3,Cav1,Casq1,Ywhaq,Fkbp1a,Slc25a4,Nol3,Slc12a2,Kcnj11,Cacna2d1,Dlg1,Atf4,Calm1,Tmsb4x,Dtnbp1,ENSRNOP00000067246,Mef2c	17	802	0.41	0.0447
GO:0043502	Regulation of muscle adaptation		Cav3,Casq1,Slc25a4,Nol3,Actn3,Mef2c	6	113	0.81	0.0449
GO:0014902	Myotube differentiation		Cav3,Cd81,Six1,Ptpla,Mef2c	5	74	0.91	0.0463
GO:0071560	Cellular response to transforming growth factor beta stimulus		Col3a1,Cav1,Skil,Col1a2,Postn,Fbn1,Mef2c	7	161	0.72	0.0463
GO:0072657	Protein localization to membrane		Cd24,Rabgef1,Rilpl1,Cav3,Cd81,Anxa2,Golga4,Ramp2,Dlg1,Rab12,Calm1,Rab10	12	454	0.5	0.0466
GO:0007519	Skeletal muscle tissue development		Popdc2,Cav1,Casq1,Skil,Six1,rCG_42402,Mef2c	7	162	0.72	0.0469
GO:0015672	Monovalent inorganic cation transport		Slc38a4,Cox6c,Slc12a2,Cox4i1,Cox5a,Cox6a2,Kcnj11,COX1,COX2,CYTB,Atp5c1,ENSRNOP00000067246	12	455	0.5	0.0469
GO:1901701	Cellular response to oxygen-containing compound		Col6a1,Serpinf1,Col3a1,Col5a2,Actr2,Cav1,Lgals1,Ipo5,Rnf146,Col1a2,Txn1,Sorbs1,Kcnj11,Cacna2d1,Six1,Atp5c1,Fbn1,Col4a1,Kat2b,Rab12,Atf4,Rab10,Mef2c	23	1291	0.33	0.0471
GO:0051155	Positive regulation of striated muscle cell differentiation		Cav3,Slc25a4,Neu2,Actn3,Mef2c	5	76	0.9	0.0491
GO:0034314	Arp2/3 complex-mediated actin nucleation		Arpc1b,Actr2,Arpc5l	3	17	1.33	0.0497
rno04260	Cardiac muscle contraction		Atp1b4,Cox6c,Tpm4,Tpm2,Cox4i1,Cox5a,Cox6a2,Cacna2d1,COX1,COX2,CYTB	11	83	1.2	3.72e-08
rno04151	PI3K-Akt signaling pathway		Col6a1,Col6a2,Sos2,Ywhaq,Eif4b,Col1a2,Col6a3,Pkn2,Col4a1,Atf4	10	325	0.57	0.0123
rno05012	Parkinson disease		Tubb5,Ndufb9,Ube2g1,Cox6c,Slc25a4,Txn1,Cox4i1,Cox5a,Cox6a2,COX1,ND3,ND2,COX2,CYTB,ND1,Atp5c1,Atf4	17	229	0.95	8.1e-09
rno05020	Prion disease		Tubb5,Cav3,Cav1,Ndufb9,Cox6c,Slc25a4,Cox4i1,Cox5a,Cox6a2,COX1,ND3,ND2,COX2,CYTB,ND1,Atp5c1,Atf4	17	258	0.9	2.33e-08
rno00190	Oxidative phosphorylation		Ndufb9,Cox6c,Cox4i1,Cox5a,Cox6a2,COX1,ND3,ND2,COX2,CYTB,ND1,Atp5c1	12	130	1.05	1.95e-07
rno05016	Huntington disease		Tubb5,Ndufb9,Cox6c,Slc25a4,Tgm2,Cox4i1,Cox5a,Cox6a2,COX1,ND3,ND2,COX2,CYTB,ND1,Atp5c1,Rb1cc1	16	283	0.83	2.67e-07
rno05010	Alzheimer disease		Tubb5,Ndufb9,Cox6c,Slc25a4,Cox4i1,Cox5a,Cox6a2,COX1,ND3,ND2,COX2,CYTB,ND1,Atp5c1,Rb1cc1,Atf4	16	349	0.74	3.64e-06
rno04714	Thermogenesis		Sos2,Ndufb9,Cox6c,Cox4i1,Cox5a,Cox6a2,COX1,ND3,ND2,COX2,CYTB,ND1,Atp5c1	13	224	0.84	4.3e-06
rno04974	Protein digestion and absorption		Col6a1,Col6a2,Col3a1,Col5a2,Atp1b4,Col1a2,Col15a1,Col6a3,Col4a1	9	99	1.04	1.14e-05
rno05014	Amyotrophic lateral sclerosis		Tubb5,Ndufb9,Cox6c,Cox4i1,Cox5a,Cox6a2,COX1,ND3,ND2,COX2,CYTB,ND1,Atp5c1,Rb1cc1,Atf4	15	340	0.73	1.14e-05
rno04932	Non-alcoholic fatty liver disease		Ndufb9,Cox6c,Cox4i1,Cox5a,Cox6a2,COX1,COX2,CYTB,Atf4	9	146	0.87	0.00019
rno04510	Focal adhesion		Col6a1,Col6a2,Sos2,Cav3,Cav1,Col1a2,Col6a3,Myl9,Col4a1	9	186	0.77	0.0011
rno00010	Glycolysis / Gluconeogenesis		Pgk1,Eno3,Ldha,Eno1,Aldoa	5	58	1.02	0.0047
rno04512	ECM-receptor interaction		Col6a1,Col6a2,Col1a2,Col6a3,Col4a1	5	78	0.89	0.0147
rno05132	Salmonella infection		Arpc1b,Txn1,Arpc5l,Tab2,Myl9,Kpna3,Anxa2	7	203	0.62	0.0404
rno01100	Metabolic pathways		St3gal6,Pgk1,Eno3,C1galt1,Ndufb9,Car3,Cox6c,Ldha,Neu2,Cox4i1,Eno1,Cox5a,Cox6a2,Aldoa,Pfkfb1,COX1,ND3,ND2,COX2,CYTB,ND1,Atp5c1,Ptpla	23	1450	0.28	0.0472
rno04066	HIF-1 signaling pathway		Pgk1,Eno3,Ldha,Eno1,Aldoa	5	106	0.75	0.0472

## Sheet: GSE13269_16 weeks
#term ID	term description	matching proteins in your network (labels)	observed gene count	background gene count	strength	false discovery rate
GO:0052547	Regulation of peptidase activity	Pcolce,Timp2,Serpinf1,Ppp2ca,Cav1,Arl6ip5,Nrd1,Uaca,Ctsh,Nol3,Serpinh1,Park7,Col6a3,Gpi,Anxa2	15	519	0.55	0.0048
GO:0043549	Regulation of kinase activity	Cd24,Zak,Hexim1,Mapt,Cav3,Ppp2ca,Cav1,Mnat1,Zfp91,Tab2,Park7,Cd81,Ttn,Pfkfb1,Actb,Socs6,Dlg1,Kat2b,Lmo4,Cdkn1c,Dtnbp1	21	936	0.44	0.0052
GO:0042326	Negative regulation of phosphorylation	Rabgef1,Hexim1,Mapt,Cav3,Ppp2ca,Cav1,Fkbp1a,Park7,Actn3,Dlg1,Kat2b,Dynll1,Cdkn1c,Dtnbp1	14	514	0.52	0.0117
GO:0051592	Response to calcium ion	Mgp,Ppp2ca,Cav1,Mnat1,Sparc,Ttn,CYTB,Calm1	8	179	0.74	0.0141
GO:0034284	Response to monosaccharide	Col6a2,Serpinf1,Ppp2ca,Lgals1,Txn1,Ldha,Sparc,Kcnj11,Ensa	9	231	0.68	0.0145
GO:0010939	Regulation of necrotic cell death	Cav1,Nol3,Fth1,COX2	4	33	1.17	0.0176
GO:0050896	Response to stimulus	Cd24,Psap,Rhobtb1,Tpt1,Col6a2,Pcolce,Zak,Mfap4,Pgk1,Hexim1,Timp2,Serpinf1,Asb11,Itgb1bp2,Col3a1,Col5a2,Cd55,Dnajb9,Eno3,Lum,Sos2,Actr2,Ubxn2a,Mapt,Strn3,Mgp,Cav3,Ppp2ca,Cav1,Casq1,Atp5g1,Mnat1,Arl6ip5,Ifi27,Fkbp1a,Akr1b1,Acadm,Lgals1,Car3,Slc25a5,Col1a2,Txn1,Zfp91,Uaca,Postn,Ldha,Sparc,Ctsh,Ifitm3,Ogn,Nol3,Sorbs1,Cul3,Tab2,Slc12a2,Eno1,Tpm1,Park7,Ampd1,Ap3d1,Lamp1,Actn3,Nrep,Cd81,Kcnj11,Gpi,Slc38…	104	9725	0.11	0.0199
GO:0005975	Carbohydrate metabolic process	Phkg1,Pgk1,Eno3,Akr1b1,Acadm,Ldha,Eno1,Ppp1r3c,Kcnj11,Gpi,Aldoa,Pfkfb1,Atf4,LOC108351137	14	579	0.47	0.0239
GO:0002863	Positive regulation of inflammatory response to antigenic stimulus	Cd24,Park7,Cd81	3	19	1.28	0.0382
GO:0097435	Supramolecular fiber organization	Mfap4,Col3a1,Col5a2,Lum,Actr2,Mapt,Cav3,Dstn,Cav1,Casq1,Fkbp1a,Col1a2,Arpc5l,Mfap5,Sorbs1,Cul3,Serpinh1,Tpm1,Nrap,Ttn,Anxa2,Tnnt3,Six4,Dlg1,Tmsb4x,Dpt	26	515	0.79	4.8e-09
GO:0032502	Developmental process	Cd24,Psap,Tpt1,Rilpl1,Suds3,Col6a2,Zak,Igfbp7,Pgk1,Popdc2,Hexim1,Tapt1,Timp2,Serpinf1,Itgb1bp2,Col3a1,Col5a2,Dnajb9,Eno3,Lum,Actr2,Mapt,Mgp,Cav3,Ppp2ca,Hectd1,Cav1,Casq1,Atp5g1,Mnat1,C1galt1,Fkbp1a,Akr1b1,Acadm,Lgals1,Cnn3,Col1a2,Postn,Ldha,Sparc,Ctsh,Bzw1,Mfap5,Nol3,Mreg,Cul3,Tab2,Slc12a2,Ppib,Serpinh1,Eno1,Tpm1,Park7,Ap3d1,Trak1,Eif4e2,Col6a3,Actn3,Sypl2,Nrep,Cd81,Gpi,Ddx3x,Nrap,Slc38a2,Alkbh5,…	96	6549	0.25	4.37e-07
GO:0046034	ATP metabolic process	Pgk1,Eno3,Atp5g1,Ndufb9,Ldha,Eno1,Cox5a,Cox6a2,Atp5j2,Gpi,Aldoa,COX1,ND2,COX2,CYTB,LOC685596,Atp5g3,LOC108351137,Ak1	19	326	0.85	4.37e-07
GO:0010033	Response to organic substance	Cd24,Psap,Col6a2,Pcolce,Timp2,Serpinf1,Col3a1,Col5a2,Dnajb9,Lum,Actr2,Ubxn2a,Mapt,Strn3,Mgp,Cav3,Ppp2ca,Cav1,Casq1,Atp5g1,Fkbp1a,Akr1b1,Acadm,Lgals1,Car3,Slc25a5,Col1a2,Txn1,Postn,Ldha,Sparc,Ctsh,Ifitm3,Sorbs1,Cul3,Tab2,Slc12a2,Eno1,Park7,Ampd1,Cd81,Kcnj11,Gpi,Aldoa,Riok3,Cacna2d1,Pfkfb1,Six1,Anxa2,ND3,Actb,CYTB,ND1,Col4a1,Atp5g3,Kat2b,Rab12,Atf4,Calm1,Ensa,Tmsb4x,ENSRNOP00000067246,Rps4x	63	3512	0.34	2.05e-06
GO:0006091	Generation of precursor metabolites and energy	Phkg1,Pgk1,Eno3,Ndufa4,Ndufb9,Acadm,Ldha,Eno1,Ppp1r3c,Cox5a,Cox6a2,Atp5j2,Gpi,Aldoa,COX1,ND2,COX2,CYTB,LOC685596,ND1,LOC108351137	21	490	0.72	3.42e-06
GO:0048513	Animal organ development	Cd24,Psap,Col6a2,Igfbp7,Popdc2,Hexim1,Tapt1,Serpinf1,Itgb1bp2,Col3a1,Col5a2,Dnajb9,Lum,Mapt,Mgp,Cav3,Ppp2ca,Hectd1,Cav1,Casq1,Mnat1,C1galt1,Fkbp1a,Akr1b1,Acadm,Lgals1,Col1a2,Ldha,Sparc,Ctsh,Mfap5,Cul3,Tab2,Slc12a2,Ppib,Serpinh1,Tpm1,Col6a3,Actn3,Sypl2,Cd81,Nrap,Slc38a2,Ttn,Pfkfb1,Six1,Anxa2,Heca,COX1,Actb,COX2,CYTB,Six4,Col4a1,Dlg1,Kat2b,Pvalb,Ptpla,Atf4,Cpe,Palld,Lmo4,Rpl24,Cdkn1c,Dtnbp1	65	3758	0.32	3.42e-06
GO:0048856	Anatomical structure development	Cd24,Psap,Rilpl1,Suds3,Col6a2,Zak,Igfbp7,Pgk1,Popdc2,Hexim1,Tapt1,Timp2,Serpinf1,Itgb1bp2,Col3a1,Col5a2,Dnajb9,Eno3,Lum,Actr2,Mapt,Mgp,Cav3,Ppp2ca,Hectd1,Cav1,Casq1,Atp5g1,Mnat1,C1galt1,Fkbp1a,Akr1b1,Acadm,Lgals1,Cnn3,Col1a2,Postn,Ldha,Sparc,Ctsh,Bzw1,Mfap5,Nol3,Cul3,Tab2,Slc12a2,Ppib,Serpinh1,Eno1,Tpm1,Trak1,Eif4e2,Col6a3,Actn3,Sypl2,Nrep,Cd81,Gpi,Nrap,Slc38a2,Ttn,Pfkfb1,Six1,Anxa2,Heca,COX1,Gol…	87	6089	0.24	1.23e-05
GO:0009888	Tissue development	Cd24,Psap,Rilpl1,Col6a2,Pgk1,Popdc2,Tapt1,Col3a1,Eno3,Lum,Mgp,Cav3,Ppp2ca,Hectd1,Cav1,Casq1,C1galt1,Fkbp1a,Akr1b1,Acadm,Cnn3,Col1a2,Postn,Ctsh,Slc12a2,Serpinh1,Tpm1,Col6a3,Cd81,Gpi,Nrap,Ttn,Six1,Actb,Six4,Vezf1,Col4a1,Dlg1,Ptpla,Atf4,Palld,Lmo4	42	1966	0.42	1.6e-05
GO:0048518	Positive regulation of biological process	Cd24,Psap,Nek7,Rabgef1,Suds3,Sumo3,Pcolce,Zak,Pgk1,Hexim1,Tapt1,Timp2,Serpinf1,Asb11,Col3a1,Cd55,Lum,Sos2,Actr2,Mapt,Strn3,Cav3,Ppp2ca,Dstn,Cav1,Casq1,Atp5g1,Mnat1,Arl6ip5,Nrd1,Faf1,Fkbp1a,Pabpc1,Akr1b1,Lgals1,Slc25a5,Txn1,Zfp91,Uaca,Postn,Ldha,Sparc,Ctsh,Arpc5l,Sorbs1,Cul3,Tab2,Slc12a2,Ppib,Eno1,Tpm1,Park7,Ap3d1,Trak1,Lamp1,Actn3,Cd81,Kcnj11,Gpi,Tmed9,Slc38a2,Aldoa,Riok3,Pkn2,Cacna2d1,Ttn,Pfkfb1…	92	6791	0.22	3.61e-05
GO:0048522	Positive regulation of cellular process	Cd24,Psap,Nek7,Suds3,Sumo3,Pcolce,Zak,Pgk1,Hexim1,Tapt1,Timp2,Serpinf1,Col3a1,Lum,Sos2,Actr2,Mapt,Strn3,Cav3,Ppp2ca,Dstn,Cav1,Casq1,Atp5g1,Mnat1,Arl6ip5,Nrd1,Faf1,Fkbp1a,Pabpc1,Akr1b1,Lgals1,Slc25a5,Txn1,Zfp91,Uaca,Postn,Ldha,Sparc,Ctsh,Arpc5l,Sorbs1,Cul3,Tab2,Slc12a2,Eno1,Tpm1,Park7,Ap3d1,Trak1,Lamp1,Actn3,Cd81,Kcnj11,Gpi,Tmed9,Slc38a2,Aldoa,Pkn2,Cacna2d1,Ttn,Pfkfb1,Ube2v1,Six1,Anxa2,Gpbp1,Golga…	87	6252	0.23	3.61e-05
GO:0015980	Energy derivation by oxidation of organic compounds	Phkg1,Ndufb9,Acadm,Ldha,Ppp1r3c,Cox5a,Cox6a2,COX1,ND2,COX2,CYTB,LOC685596,ND1	13	219	0.86	6.56e-05
GO:0030198	Extracellular matrix organization	Mfap4,Col3a1,Col5a2,Lum,Cav1,Col1a2,Col15a1,Postn,Serpinh1,Col6a3,Anxa2,Col4a1,Ccdc80,Dpt	14	259	0.82	6.56e-05
GO:0048731	System development	Cd24,Psap,Col6a2,Igfbp7,Popdc2,Hexim1,Tapt1,Timp2,Serpinf1,Itgb1bp2,Col3a1,Col5a2,Dnajb9,Lum,Actr2,Mapt,Mgp,Cav3,Ppp2ca,Hectd1,Cav1,Casq1,Atp5g1,Mnat1,C1galt1,Fkbp1a,Akr1b1,Acadm,Lgals1,Col1a2,Postn,Ldha,Sparc,Ctsh,Bzw1,Mfap5,Cul3,Tab2,Slc12a2,Ppib,Serpinh1,Tpm1,Trak1,Col6a3,Actn3,Sypl2,Nrep,Cd81,Nrap,Slc38a2,Ttn,Pfkfb1,Six1,Anxa2,Heca,COX1,Golga4,Actb,COX2,CYTB,Six4,Vezf1,Col4a1,Dlg1,Kat2b,Pvalb…	74	5030	0.25	6.56e-05
GO:0061061	Muscle structure development	Popdc2,Itgb1bp2,Col3a1,Cav3,Cav1,Casq1,Fkbp1a,Acadm,Lgals1,Nol3,Tpm1,Col6a3,Sypl2,Cd81,Nrap,Ttn,Six1,Tnnt3,Six4,Ptpla	20	555	0.64	6.56e-05
GO:0009628	Response to abiotic stimulus	Cd24,Zak,Mfap4,Pgk1,Serpinf1,Col3a1,Mgp,Cav3,Cav1,Casq1,Atp5g1,Akr1b1,Acadm,Txn1,Uaca,Postn,Ldha,Sparc,Nol3,Slc12a2,Eno1,Gpi,Slc38a2,Aldoa,Alkbh5,Ttn,COX1,ND3,Actb,COX2,CYTB,Atp5g3,Atf4	33	1428	0.45	7.19e-05
GO:0007275	Multicellular organism development	Cd24,Psap,Suds3,Col6a2,Zak,Igfbp7,Popdc2,Hexim1,Tapt1,Timp2,Serpinf1,Itgb1bp2,Col3a1,Col5a2,Dnajb9,Lum,Actr2,Mapt,Mgp,Cav3,Ppp2ca,Hectd1,Cav1,Casq1,Atp5g1,Mnat1,C1galt1,Fkbp1a,Akr1b1,Acadm,Lgals1,Col1a2,Postn,Ldha,Sparc,Ctsh,Bzw1,Mfap5,Cul3,Tab2,Slc12a2,Ppib,Serpinh1,Eno1,Tpm1,Trak1,Eif4e2,Col6a3,Actn3,Sypl2,Nrep,Cd81,Gpi,Nrap,Slc38a2,Ttn,Pfkfb1,Six1,Anxa2,Heca,COX1,Golga4,Actb,COX2,CYTB,Six4,Vez…	80	5716	0.23	9.08e-05
GO:0042773	ATP synthesis coupled electron transport	Ndufb9,Cox5a,Cox6a2,COX1,ND2,COX2,CYTB,LOC685596	8	65	1.18	0.0001
GO:0009653	Anatomical structure morphogenesis	Psap,Rilpl1,Col6a2,Zak,Col3a1,Col5a2,Mapt,Mgp,Cav3,Hectd1,Cav1,Casq1,C1galt1,Fkbp1a,Col1a2,Postn,Ctsh,Mfap5,Cul3,Slc12a2,Serpinh1,Tpm1,Trak1,Col6a3,Actn3,Cd81,Gpi,Nrap,Ttn,Six1,Anxa2,Actb,Tnnt3,Six4,Vezf1,Col4a1,Dlg1,Ptpla,Atf4,Cpe,Palld,Lmo4,Rpl24,Cdkn1c,Dtnbp1	45	2427	0.35	0.00011
GO:0050790	Regulation of catalytic activity	Cd24,Psap,Nek7,Pcolce,Zak,Hexim1,Timp2,Serpinf1,Cd55,Mapt,Cav3,Ppp2ca,Cav1,Mnat1,Arl6ip5,Nrd1,Fkbp1a,Cnn3,Zfp91,Uaca,Ctsh,Nol3,Tab2,Serpinh1,Tpm1,Park7,Col6a3,Cox6a2,Cd81,Gpi,Ttn,Pfkfb1,Anxa2,Actb,Tnnt3,Socs6,Dlg1,Kat2b,Dynll1,Pfn2,Lmo4,Calm1,Ensa,Tmsb4x,Cdkn1c,Dtnbp1	46	2518	0.35	0.00011
GO:0030036	Actin cytoskeleton organization	Actr2,Cav3,Dstn,Casq1,Cnn3,Arpc5l,Sorbs1,Cul3,Tpm1,Nrap,Ttn,Actb,Tnnt3,Six4,Dlg1,Pfn2,Palld,Tmsb4x,Dtnbp1	19	551	0.62	0.00014
GO:1901700	Response to oxygen-containing compound	Col6a2,Serpinf1,Col3a1,Col5a2,Actr2,Strn3,Ppp2ca,Cav1,Atp5g1,Akr1b1,Lgals1,Car3,Col1a2,Txn1,Postn,Ldha,Sparc,Ctsh,Sorbs1,Tab2,Tpm1,Park7,Kcnj11,Gpi,Slc38a2,Aldoa,Cacna2d1,Pfkfb1,Six1,Actb,CYTB,ND1,Col4a1,Atp5g3,Kat2b,Rab12,Atf4,Ensa,ENSRNOP00000067246,Rps4x	40	2048	0.38	0.00015
GO:0030029	Actin filament-based process	Actr2,Cav3,Dstn,Casq1,Cnn3,Arpc5l,Sorbs1,Cul3,Tpm1,Nrap,Cacna2d1,Ttn,Actb,Tnnt3,Six4,Dlg1,Pfn2,Palld,Tmsb4x,Dtnbp1	20	616	0.6	0.00016
GO:0030199	Collagen fibril organization	Col3a1,Col5a2,Lum,Col1a2,Serpinh1,Anxa2,Dpt	7	50	1.23	0.00021
GO:0051239	Regulation of multicellular organismal process	Cd24,Rabgef1,Pgk1,Popdc2,Tapt1,Timp2,Serpinf1,Col3a1,Col5a2,Lum,Sos2,Actr2,Mapt,Mgp,Cav3,Ppp2ca,Cav1,Casq1,Atp5g1,Nrd1,Lgals1,Postn,Sparc,Ctsh,Nol3,Slc12a2,Ppib,Eno1,Tpm1,Park7,Ap3d1,Trak1,Actn3,Nrep,Cd81,Gpi,Riok3,Cacna2d1,Ttn,Six1,Anxa2,Golga4,Tnnt3,Six4,Vezf1,Dlg1,Kat2b,Atf4,Cpe,Pfn2,Calm1,Tmsb4x,Cdkn1c,Dtnbp1,ENSRNOP00000067246,Tnni2	56	3488	0.29	0.00021
GO:0006119	Oxidative phosphorylation	Ndufb9,Cox5a,Cox6a2,Atp5j2,COX1,ND2,COX2,CYTB,LOC685596	9	107	1.01	0.00024
GO:0010243	Response to organonitrogen compound	Col3a1,Col5a2,Dnajb9,Actr2,Cav3,Ppp2ca,Cav1,Atp5g1,Fkbp1a,Akr1b1,Col1a2,Txn1,Ldha,Sparc,Sorbs1,Cd81,Kcnj11,Gpi,Cacna2d1,Pfkfb1,Six1,Actb,CYTB,Col4a1,Atp5g3,Kat2b,Rab12,Atf4,Calm1,ENSRNOP00000067246	30	1313	0.44	0.00024
GO:1901698	Response to nitrogen compound	Col3a1,Col5a2,Dnajb9,Actr2,Cav3,Ppp2ca,Cav1,Atp5g1,Fkbp1a,Akr1b1,Col1a2,Txn1,Ldha,Sparc,Sorbs1,Cd81,Kcnj11,Gpi,Riok3,Cacna2d1,Pfkfb1,Six1,Actb,CYTB,Col4a1,Atp5g3,Kat2b,Rab12,Atf4,Calm1,ENSRNOP00000067246	31	1410	0.43	0.00031
GO:0072359	Circulatory system development	Popdc2,Hexim1,Col3a1,Cav3,Ppp2ca,Hectd1,Cav1,Mnat1,C1galt1,Fkbp1a,Acadm,Col1a2,Sparc,Tab2,Tpm1,Sypl2,Nrap,Ttn,Six1,Anxa2,Vezf1,Col4a1,Kat2b,Cpe,Lmo4	25	993	0.49	0.0004
GO:0051146	Striated muscle cell differentiation	Popdc2,Cav3,Casq1,Acadm,Tpm1,Cd81,Nrap,Ttn,Six1,Tnnt3,Six4,Ptpla	12	235	0.79	0.00041
GO:0007507	Heart development	Popdc2,Hexim1,Col3a1,Cav3,Ppp2ca,Hectd1,Mnat1,Fkbp1a,Acadm,Sparc,Tab2,Tpm1,Sypl2,Nrap,Ttn,Six1,Kat2b,Cpe,Lmo4	19	610	0.58	0.00042
GO:0031032	Actomyosin structure organization	Casq1,Cnn3,Sorbs1,Cul3,Tpm1,Nrap,Ttn,Tnnt3,Six4	9	119	0.96	0.00043
GO:0009719	Response to endogenous stimulus	Cd24,Timp2,Serpinf1,Col3a1,Col5a2,Actr2,Mgp,Cav3,Ppp2ca,Cav1,Atp5g1,Akr1b1,Acadm,Col1a2,Txn1,Postn,Ldha,Sparc,Ctsh,Sorbs1,Cd81,Gpi,Aldoa,Cacna2d1,Pfkfb1,Six1,Anxa2,ND3,Actb,CYTB,Col4a1,Kat2b,Rab12,Atf4,ENSRNOP00000067246	35	1761	0.38	0.00044
GO:0042775	Mitochondrial atp synthesis coupled electron transport	Ndufb9,Cox5a,Cox6a2,COX1,ND2,CYTB,LOC685596	7	60	1.15	0.00046
GO:1902600	Proton transmembrane transport	Ndufa4,Atp5g1,Cox5a,Cox6a2,Atp5j2,COX1,COX2,CYTB,Atp5g3,ENSRNOP00000067246	10	159	0.88	0.00048
GO:0022898	Regulation of transmembrane transporter activity	Cav3,Ppp2ca,Cav1,Casq1,Fkbp1a,Park7,Kcnj11,Cacna2d1,Actb,Dlg1,Calm1,Tmsb4x,ENSRNOP00000067246	13	291	0.74	0.00049
GO:0019220	Regulation of phosphate metabolic process	Cd24,Psap,Rabgef1,Zak,Pgk1,Hexim1,Timp2,Mapt,Cav3,Ppp2ca,Cav1,Mnat1,Arl6ip5,Fkbp1a,Txn1,Zfp91,Tab2,Eno1,Park7,Actn3,Cd81,Ttn,Pfkfb1,Anxa2,Actb,COX2,Socs6,Dlg1,Kat2b,Dynll1,Pfn2,Lmo4,Calm1,Ensa,Tmsb4x,Cdkn1c,Dtnbp1	37	1953	0.36	0.00056
GO:0042692	Muscle cell differentiation	Popdc2,Cav3,Casq1,Acadm,Tpm1,Sypl2,Cd81,Nrap,Ttn,Six1,Tnnt3,Six4,Ptpla	13	298	0.73	0.00058
GO:0006942	Regulation of striated muscle contraction	Cav3,Cav1,Casq1,Actn3,Tnnt3,Dlg1,Calm1,ENSRNOP00000067246	8	94	1.02	0.0006
GO:0010038	Response to metal ion	Serpinf1,Mapt,Mgp,Ppp2ca,Cav1,Mnat1,Fkbp1a,Acadm,Sparc,Slc12a2,Park7,Gpi,Ttn,COX1,CYTB,Atf4,Calm1	17	516	0.6	0.0006
GO:0060341	Regulation of cellular localization	Rabgef1,Sumo3,Mapt,Cav3,Ppp2ca,Hectd1,Cav1,Casq1,Fkbp1a,Txn1,Uaca,Nol3,Sorbs1,Park7,Ap3d1,Lamp1,Cd81,Kcnj11,Cacna2d1,Anxa2,Actb,Dlg1,Dynll1,Pfn2,Calm1,Dtnbp1,ENSRNOP00000067246	27	1188	0.44	0.00062
GO:0006937	Regulation of muscle contraction	Cav3,Cav1,Casq1,Eno1,Actn3,Tnnt3,Dlg1,Calm1,ENSRNOP00000067246,Tnni2	10	170	0.85	0.00068
GO:0010035	Response to inorganic substance	Serpinf1,Mapt,Mgp,Ppp2ca,Cav1,Mnat1,Fkbp1a,Akr1b1,Acadm,Txn1,Ldha,Sparc,Slc12a2,Park7,Gpi,Slc38a2,Ttn,COX1,CYTB,Atf4,Calm1	21	775	0.52	0.00068
GO:0055001	Muscle cell development	Popdc2,Cav3,Casq1,Tpm1,Sypl2,Nrap,Ttn,Six1,Tnnt3,Six4	10	172	0.85	0.00072
GO:0022900	Electron transport chain	Ndufa4,Ndufb9,Cox5a,Cox6a2,COX1,ND2,COX2,CYTB,LOC685596	9	135	0.91	0.00079
GO:0051641	Cellular localization	Cd24,Psap,Rabgef1,Rilpl1,Sumo3,Tapt1,Actr2,Mapt,Cav3,Cav1,Fkbp1a,Txn1,Xpo7,Nol3,Mreg,Cul3,Ppib,Park7,Ap3d1,Trak1,Lamp1,Cd81,Atp5j2,Tmed9,Kpna3,Alkbh5,Cacna2d1,Six1,Fth1,Anxa2,Golga4,Actb,Six4,Dlg1,Rab12,Cpe,Dynll1,Calm1,Tmsb4x,Mia3,Dtnbp1,ENSRNOP00000067246	42	2434	0.32	0.0008
GO:0030154	Cell differentiation	Cd24,Psap,Rilpl1,Col6a2,Pgk1,Popdc2,Tapt1,Timp2,Serpinf1,Col3a1,Dnajb9,Actr2,Mapt,Mgp,Cav3,Hectd1,Cav1,Casq1,Atp5g1,C1galt1,Akr1b1,Acadm,Lgals1,Cnn3,Postn,Bzw1,Nol3,Mreg,Cul3,Serpinh1,Tpm1,Ap3d1,Trak1,Col6a3,Sypl2,Nrep,Cd81,Ddx3x,Nrap,Alkbh5,Ttn,Six1,Anxa2,Golga4,Adig,Actb,Tnnt3,Six4,Vezf1,Col4a1,Kat2b,Ptpla,Atf4,Dynll1,Palld,Lmo4,Rpl24,Tmsb4x,Cdkn1c,Dtnbp1	60	4114	0.25	0.00081
GO:0043254	Regulation of protein-containing complex assembly	Cd24,Actr2,Mapt,Cav3,Cav1,Faf1,Arpc5l,Nol3,Tpm1,Park7,Riok3,Dlg1,Pfn2,Palld,Lmo4,Tmsb4x	16	479	0.61	0.00083
GO:0001501	Skeletal system development	Col6a2,Tapt1,Col3a1,Col5a2,Lum,Mgp,Col1a2,Sparc,Ppib,Serpinh1,Col6a3,Actn3,Six1,Anxa2,Six4,Dlg1,Cdkn1c	17	541	0.58	0.00087
GO:0090257	Regulation of muscle system process	Cav3,Cav1,Casq1,Nol3,Eno1,Actn3,Ttn,Tnnt3,Dlg1,Calm1,ENSRNOP00000067246,Tnni2	12	268	0.74	0.00087
GO:0003015	Heart process	Cav3,Cav1,Myl1,Tpm1,Cacna2d1,Ttn,Tnnt3,Tnni2	8	104	0.97	0.00094
GO:0006936	Muscle contraction	Cav3,Fkbp1a,Myl1,Tpm1,Actn3,Aldoa,Cacna2d1,Ttn,Tnnt3,Dlg1,Tnni2	11	227	0.77	0.001
GO:0032412	Regulation of ion transmembrane transporter activity	Cav3,Ppp2ca,Cav1,Casq1,Fkbp1a,Park7,Kcnj11,Cacna2d1,Dlg1,Calm1,Tmsb4x,ENSRNOP00000067246	12	279	0.72	0.0012
GO:0045333	Cellular respiration	Ndufb9,Cox5a,Cox6a2,COX1,ND2,COX2,CYTB,LOC685596,ND1	9	147	0.87	0.0013
GO:0009987	Cellular process	Cd24,Psap,Rhobtb1,Nek7,Rabgef1,Phkg1,Tpt1,Rilpl1,Suds3,Sumo3,Col6a2,Pcolce,Zak,Igfbp7,Mfap4,Pgk1,Popdc2,Tapt1,Timp2,Serpinf1,Asb11,Itgb1bp2,Col3a1,Col5a2,Dnajb9,Eno3,Ebag9,Lum,Sos2,Actr2,Ubxn2a,Mapt,Ndufa4,Mgp,Cav3,Ppp2ca,Dstn,Hectd1,Ppia,Slc38a4,Cav1,Casq1,Atp5g1,Mnat1,Arl6ip5,C1galt1,Nrd1,Tmem43,Faf1,Chrac1,Ifi27,Nudt4,Fkbp1a,Ndufb9,Pabpc1,Akr1b1,Acadm,Ube2g1,Lgals1,Eif4b,Car3,Hadhb,Cnn3,Slc25a…	171	18050	0.06	0.0014
GO:0003012	Muscle system process	Cav3,Fkbp1a,Myl1,Tpm1,Actn3,Aldoa,Cacna2d1,Ttn,Tnnt3,Dlg1,ENSRNOP00000067246,Tnni2	12	293	0.7	0.0017
GO:0042221	Response to chemical	Cd24,Psap,Col6a2,Pcolce,Pgk1,Timp2,Serpinf1,Col3a1,Col5a2,Dnajb9,Eno3,Lum,Actr2,Ubxn2a,Mapt,Strn3,Mgp,Cav3,Ppp2ca,Cav1,Casq1,Atp5g1,Mnat1,Arl6ip5,Fkbp1a,Akr1b1,Acadm,Lgals1,Car3,Slc25a5,Col1a2,Txn1,Uaca,Postn,Ldha,Sparc,Ctsh,Ifitm3,Nol3,Sorbs1,Cul3,Tab2,Slc12a2,Eno1,Tpm1,Park7,Ampd1,Cd81,Kcnj11,Gpi,Slc38a2,Aldoa,Riok3,Cacna2d1,Ttn,Pfkfb1,Six1,Anxa2,COX1,ND3,Actb,CYTB,ND1,Col4a1,Atp5g3,Kat2b,Rab12…	75	5773	0.2	0.0017
GO:0060048	Cardiac muscle contraction	Cav3,Myl1,Tpm1,Cacna2d1,Ttn,Tnnt3,Tnni2	7	81	1.02	0.0017
GO:0065008	Regulation of biological quality	Cd24,Nek7,Popdc2,Tapt1,Serpinf1,Sos2,Actr2,Mapt,Cav3,Ppp2ca,Dstn,Cav1,Casq1,Atp5g1,Arl6ip5,Nrd1,Faf1,Fkbp1a,Akr1b1,Lgals1,Slc25a5,Col1a2,Txn1,Postn,Sparc,Ctsh,Arpc5l,Nol3,Sorbs1,Cul3,Slc12a2,Ppib,Tpm1,Park7,Ap3d1,Lamp1,Actn3,Sypl2,Cd81,Kcnj11,Gpi,Aldoa,Alkbh5,Cacna2d1,Six1,Fth1,Anxa2,Golga4,COX2,Pnpla8,Six4,Dlg1,Kat2b,Atf4,Cpe,Dynll1,Pfn2,Calm1,Ensa,LOC108351137,Tmsb4x,Dtnbp1,ENSRNOP00000067246	63	4532	0.23	0.0017
GO:0031334	Positive regulation of protein-containing complex assembly	Cd24,Actr2,Mapt,Cav3,Cav1,Faf1,Arpc5l,Park7,Dlg1,Pfn2,Palld	11	246	0.74	0.0018
GO:0044092	Negative regulation of molecular function	Sumo3,Hexim1,Timp2,Serpinf1,Cd55,Mapt,Cav3,Ppp2ca,Cav1,Mnat1,Faf1,Fkbp1a,Cnn3,Nol3,Serpinh1,Park7,Col6a3,Gpi,Anxa2,Actb,Kat2b,Dynll1,Calm1,Ensa,Tmsb4x,Cdkn1c,Dtnbp1	27	1291	0.41	0.0019
GO:0055002	Striated muscle cell development	Popdc2,Cav3,Casq1,Tpm1,Nrap,Ttn,Six1,Tnnt3,Six4	9	158	0.84	0.0019
GO:1903580	Positive regulation of atp metabolic process	Pgk1,Eno1,Park7,Actn3,COX2,Tmsb4x	6	54	1.13	0.0019
GO:0006950	Response to stress	Cd24,Zak,Pgk1,Hexim1,Col3a1,Cd55,Dnajb9,Actr2,Mapt,Cav3,Cav1,Casq1,Atp5g1,Mnat1,Arl6ip5,Ifi27,Akr1b1,Acadm,Lgals1,Car3,Txn1,Uaca,Postn,Ldha,Sparc,Ifitm3,Nol3,Sorbs1,Cul3,Slc12a2,Eno1,Tpm1,Park7,Nrep,Cd81,Kcnj11,Gpi,Slc38a2,Aldoa,Riok3,Alkbh5,Pfkfb1,Ube2v1,COX1,ND3,Actb,COX2,CYTB,ND1,Vezf1,Rab12,Atf4,Dtnbp1,ENSRNOP00000067246	54	3683	0.25	0.002
GO:0006812	Cation transport	Ndufa4,Slc38a4,Cav1,Atp5g1,Fkbp1a,Nol3,Slc12a2,Park7,Cox5a,Ap3d1,Cox6a2,Kcnj11,Atp5j2,Slc38a2,Cacna2d1,Fth1,Anxa2,COX1,COX2,CYTB,Atp5g3,ENSRNOP00000067246	22	937	0.46	0.0023
GO:0032268	Regulation of cellular protein metabolic process	Cd24,Psap,Rabgef1,Sumo3,Pcolce,Zak,Hexim1,Timp2,Serpinf1,Ubxn2a,Mapt,Cav3,Ppp2ca,Cav1,Mnat1,Arl6ip5,Nrd1,Faf1,Fkbp1a,Eif4b,Txn1,Zfp91,Uaca,Ctsh,Nol3,Cul3,Tab2,Serpinh1,Eno1,Park7,Hhatl,Eif4e2,Col6a3,Cd81,Gpi,Ttn,Anxa2,Actb,Dlg1,Kat2b,Atf4,Pfn2,Calm1,Ensa,LOC108351137,Cdkn1c,Dtnbp1,Rps4x	48	3128	0.27	0.0023
GO:0060537	Muscle tissue development	Popdc2,Col3a1,Cav3,Cav1,Casq1,Fkbp1a,Acadm,Tpm1,Nrap,Ttn,Six1,Six4,Dlg1	13	361	0.64	0.0024
GO:0006941	Striated muscle contraction	Cav3,Myl1,Tpm1,Aldoa,Cacna2d1,Ttn,Tnnt3,Tnni2	8	127	0.88	0.0028
GO:0016043	Cellular component organization	Cd24,Psap,Rilpl1,Suds3,Zak,Mfap4,Tapt1,Col3a1,Col5a2,Lum,Actr2,Ubxn2a,Mapt,Mgp,Cav3,Dstn,Cav1,Casq1,Atp5g1,Tmem43,Fkbp1a,Ndufb9,Eif4b,Cnn3,Slc25a5,Col1a2,Col15a1,Postn,Arpc5l,Mfap5,Nol3,Mreg,Sorbs1,Cul3,Slc12a2,Serpinh1,Tpm1,Park7,Ap3d1,Trak1,Col6a3,Sypl2,Nrep,Nrap,Tmed9,Aldoa,Pkn2,Ttn,Anxa2,Golga4,Actb,LOC685596,Tnnt3,Six4,Csde1,Col4a1,Atp5g3,Dlg1,Ccdc80,Kat2b,Rab12,Ptpla,Dynll1,Pfn2,Palld,Calm1…	74	5777	0.19	0.0028
GO:0042325	Regulation of phosphorylation	Cd24,Psap,Rabgef1,Zak,Pgk1,Hexim1,Timp2,Mapt,Cav3,Ppp2ca,Cav1,Mnat1,Arl6ip5,Fkbp1a,Txn1,Zfp91,Tab2,Park7,Actn3,Cd81,Ttn,Pfkfb1,Anxa2,Actb,Socs6,Dlg1,Kat2b,Dynll1,Pfn2,Lmo4,Cdkn1c,Dtnbp1	32	1732	0.35	0.0028
GO:0044093	Positive regulation of molecular function	Cd24,Psap,Nek7,Pcolce,Zak,Timp2,Ppp2ca,Cav1,Casq1,Mnat1,Arl6ip5,Fkbp1a,Txn1,Zfp91,Uaca,Ctsh,Tab2,Eno1,Tpm1,Park7,Cd81,Kcnj11,Cacna2d1,Pfkfb1,Ube2v1,Anxa2,Dlg1,Kat2b,Dynll1,Pfn2,Lmo4,Calm1,Tmsb4x,ENSRNOP00000067246	34	1905	0.34	0.0028
GO:0055114	Oxidation-reduction process	Phkg1,Pgk1,Ndufa4,Ndufb9,Akr1b1,Acadm,Hadhb,Txn1,Ldha,Eno1,Park7,Ppp1r3c,Cox5a,Cox6a2,Alkbh5,Fth1,COX1,ND3,ND2,COX2,CYTB,LOC685596,ND1,LOC108351137,Aldh1l1	25	1177	0.41	0.0028
GO:0080134	Regulation of response to stress	Cd24,Psap,Rabgef1,Tpt1,Zak,Hexim1,Serpinf1,Dnajb9,Actr2,Mapt,Cav3,Cav1,Arl6ip5,Txn1,Uaca,Nol3,Slc12a2,Eno1,Park7,Lamp1,Cd81,Slc38a2,Riok3,Anxa2,Dlg1,Atf4,Tmsb4x,Dtnbp1	28	1415	0.38	0.0028
GO:0048519	Negative regulation of biological process	Cd24,Psap,Rabgef1,Tpt1,Suds3,Zak,Pgk1,Hexim1,Timp2,Serpinf1,Col3a1,Col5a2,Cd55,Dnajb9,Mapt,Strn3,Cav3,Ppp2ca,Hectd1,Cav1,Atp5g1,Mnat1,Arl6ip5,Nrd1,Faf1,Fkbp1a,Pabpc1,Akr1b1,Naa38,Lgals1,Slc25a5,Txn1,Uaca,Postn,Sparc,Ctsh,Ifitm3,Nol3,Cul3,Slc12a2,Serpinh1,Eno1,Tpm1,Park7,Hhatl,Eif4e2,Col6a3,Actn3,Kcnj11,Gpi,Riok3,Six1,Fth1,Anxa2,Heca,Six4,Csde1,Socs6,Dlg1,Kat2b,Atf4,Cpe,Dynll1,Pfn2,Lmo4,Calm1,Ensa…	74	5794	0.19	0.0029
GO:0007015	Actin filament organization	Actr2,Cav3,Dstn,Arpc5l,Sorbs1,Cul3,Tpm1,Nrap,Ttn,Dlg1,Tmsb4x	11	268	0.7	0.0031
GO:0051246	Regulation of protein metabolic process	Cd24,Psap,Rabgef1,Sumo3,Pcolce,Zak,Hexim1,Timp2,Serpinf1,Asb11,Ubxn2a,Mapt,Cav3,Ppp2ca,Cav1,Mnat1,Arl6ip5,Nrd1,Faf1,Fkbp1a,Eif4b,Txn1,Zfp91,Uaca,Ctsh,Nol3,Cul3,Tab2,Serpinh1,Eno1,Park7,Hhatl,Eif4e2,Col6a3,Cd81,Gpi,Ttn,Anxa2,Actb,Dlg1,Kat2b,Atf4,Pfn2,Calm1,Ensa,LOC108351137,Cdkn1c,Dtnbp1,Rps4x	49	3278	0.26	0.0031
GO:0032879	Regulation of localization	Rabgef1,Sumo3,Serpinf1,Col3a1,Mapt,Cav3,Ppp2ca,Hectd1,Cav1,Casq1,Arl6ip5,Fkbp1a,Slc25a5,Txn1,Uaca,Postn,Sparc,Ctsh,Nol3,Sorbs1,Slc12a2,Tpm1,Park7,Ap3d1,Lamp1,Cd81,Kcnj11,Gpi,Aldoa,Pkn2,Cacna2d1,Ttn,Six1,Anxa2,Actb,Six4,Dlg1,Rab12,Atf4,Dynll1,Pfn2,Lmo4,Calm1,Ensa,Tmsb4x,Dtnbp1,ENSRNOP00000067246	47	3105	0.27	0.0034
GO:1901019	Regulation of calcium ion transmembrane transporter activity	Cav3,Ppp2ca,Casq1,Fkbp1a,Cacna2d1,Calm1,ENSRNOP00000067246	7	96	0.95	0.0034
GO:1904062	Regulation of cation transmembrane transport	Cav3,Ppp2ca,Cav1,Casq1,Fkbp1a,Nol3,Park7,Kcnj11,Cacna2d1,Dlg1,Calm1,Tmsb4x,ENSRNOP00000067246	13	379	0.62	0.0034
GO:0014819	Regulation of skeletal muscle contraction	Cav3,Casq1,Actn3,ENSRNOP00000067246	4	17	1.46	0.0035
GO:0043086	Negative regulation of catalytic activity	Hexim1,Timp2,Serpinf1,Cd55,Mapt,Cav3,Cav1,Mnat1,Fkbp1a,Cnn3,Nol3,Serpinh1,Park7,Col6a3,Gpi,Anxa2,Kat2b,Dynll1,Ensa,Cdkn1c,Dtnbp1	21	903	0.45	0.0035
GO:0016310	Phosphorylation	Nek7,Phkg1,Zak,Pgk1,Eno3,Mnat1,Ndufb9,Ctsh,Eno1,Cox5a,Cox6a2,Atp5j2,Gpi,Aldoa,Riok3,Pkn2,Ttn,Pfkfb1,COX1,ND2,COX2,CYTB,LOC685596,Socs6,LOC108351137,Ak1	26	1284	0.39	0.0036
GO:0030239	Myofibril assembly	Casq1,Tpm1,Nrap,Ttn,Tnnt3,Six4	6	65	1.05	0.0037
GO:0098662	Inorganic cation transmembrane transport	Ndufa4,Atp5g1,Fkbp1a,Nol3,Slc12a2,Cox5a,Cox6a2,Kcnj11,Atp5j2,Slc38a2,Cacna2d1,Anxa2,COX1,COX2,CYTB,Atp5g3,ENSRNOP00000067246	17	632	0.52	0.0037
GO:0015672	Monovalent inorganic cation transport	Ndufa4,Slc38a4,Atp5g1,Slc12a2,Cox5a,Cox6a2,Kcnj11,Atp5j2,Slc38a2,COX1,COX2,CYTB,Atp5g3,ENSRNOP00000067246	14	455	0.57	0.0047
GO:0048468	Cell development	Cd24,Psap,Rilpl1,Col6a2,Popdc2,Tapt1,Mapt,Cav3,Casq1,C1galt1,Akr1b1,Postn,Cul3,Serpinh1,Tpm1,Trak1,Col6a3,Sypl2,Nrep,Nrap,Ttn,Six1,Anxa2,Actb,Tnnt3,Six4,Vezf1,Atf4,Dynll1,Palld,Rpl24,Cdkn1c,Dtnbp1	33	1887	0.33	0.0047
GO:0050789	Regulation of biological process	Cd24,Psap,Rhobtb1,Nek7,Rabgef1,Tpt1,Rilpl1,Suds3,Sumo3,Pcolce,Zak,Igfbp7,Mfap4,Pgk1,Popdc2,Hexim1,Tapt1,Timp2,Serpinf1,Asb11,Itgb1bp2,Col3a1,Col5a2,Cd55,Dnajb9,Eno3,Lum,Sos2,Actr2,Ubxn2a,Mapt,Strn3,Mgp,Phf20l1,Cav3,Ppp2ca,Dstn,Hectd1,Ppia,Cav1,Casq1,Atp5g1,Mnat1,Arl6ip5,Nrd1,Faf1,Ifi27,Fkbp1a,Pabpc1,Akr1b1,Naa38,Acadm,Lgals1,Eif4b,Slc25a5,Col1a2,Txn1,Zfp91,Uaca,Postn,Ldha,Sparc,Ctsh,Arpc5l,Ifitm3…	138	13540	0.09	0.0047
GO:0014070	Response to organic cyclic compound	Serpinf1,Lum,Actr2,Strn3,Mgp,Ppp2ca,Cav1,Atp5g1,Fkbp1a,Acadm,Lgals1,Col1a2,Txn1,Postn,Ldha,Sparc,Kcnj11,Gpi,Riok3,Pfkfb1,Six1,ND3,Actb,CYTB,ND1,Atf4	26	1313	0.38	0.0048
GO:0051128	Regulation of cellular component organization	Cd24,Nek7,Rabgef1,Igfbp7,Tapt1,Serpinf1,Eno3,Actr2,Mapt,Cav3,Dstn,Cav1,Atp5g1,Mnat1,Faf1,Lgals1,Slc25a5,Sparc,Arpc5l,Nol3,Sorbs1,Cul3,Eno1,Tpm1,Park7,Trak1,Tmed9,Riok3,Six1,Anxa2,Golga4,Six4,Dlg1,Kat2b,Dynll1,Pfn2,Palld,Lmo4,Calm1,Tmsb4x,Cdkn1c,Dtnbp1	42	2704	0.28	0.0052
GO:0034613	Cellular protein localization	Cd24,Psap,Rabgef1,Rilpl1,Sumo3,Tapt1,Cav3,Cav1,Txn1,Xpo7,Park7,Ap3d1,Trak1,Lamp1,Cd81,Tmed9,Kpna3,Alkbh5,Six1,Anxa2,Golga4,Six4,Dlg1,Rab12,Cpe,Dynll1,Calm1,Tmsb4x,Mia3	29	1571	0.35	0.0055
GO:2001257	Regulation of cation channel activity	Cav1,Casq1,Fkbp1a,Park7,Kcnj11,Cacna2d1,Dlg1,Calm1,Tmsb4x	9	191	0.76	0.0055
GO:0051651	Maintenance of location in cell	Tapt1,Cav1,Txn1,Park7,Fth1,Tmsb4x,ENSRNOP00000067246	7	107	0.9	0.0056
GO:0065009	Regulation of molecular function	Cd24,Psap,Nek7,Rabgef1,Sumo3,Pcolce,Zak,Hexim1,Timp2,Serpinf1,Cd55,Sos2,Mapt,Strn3,Cav3,Ppp2ca,Cav1,Casq1,Mnat1,Arl6ip5,Nrd1,Faf1,Fkbp1a,Cnn3,Txn1,Zfp91,Uaca,Ctsh,Ogn,Nol3,Tab2,Serpinh1,Eno1,Tpm1,Park7,Col6a3,Cox6a2,Cd81,Kcnj11,Gpi,Cacna2d1,Ttn,Pfkfb1,Ube2v1,Rfx7,Six1,Anxa2,Gpbp1,Actb,Tnnt3,Six4,Vezf1,Socs6,Dlg1,Kat2b,Atf4,Dynll1,Pfn2,Lmo4,Calm1,Ensa,Tmsb4x,Cdkn1c,Dtnbp1,ENSRNOP00000067246	65	4992	0.2	0.0056
GO:0070887	Cellular response to chemical stimulus	Psap,Pcolce,Pgk1,Timp2,Serpinf1,Col3a1,Col5a2,Actr2,Ubxn2a,Mapt,Cav3,Ppp2ca,Cav1,Atp5g1,Arl6ip5,Fkbp1a,Akr1b1,Lgals1,Slc25a5,Col1a2,Txn1,Uaca,Postn,Sparc,Ctsh,Ifitm3,Nol3,Sorbs1,Cul3,Slc12a2,Eno1,Tpm1,Park7,Kcnj11,Slc38a2,Riok3,Cacna2d1,Six1,ND3,Actb,Col4a1,Kat2b,Rab12,Atf4,Tmsb4x	45	3000	0.26	0.0056
GO:0006796	Phosphate-containing compound metabolic process	Nek7,Phkg1,Zak,Pgk1,Eno3,Ppp2ca,Atp5g1,Mnat1,Nudt4,Ndufb9,Car3,Ctsh,Eno1,Park7,Ppp1r3c,Ampd1,Cox5a,Cox6a2,Atp5j2,Gpi,Aldoa,Riok3,Pkn2,Ttn,Pfkfb1,COX1,ND2,COX2,CYTB,LOC685596,Pnpla8,Socs6,Atp5g3,LOC108351137,Ak1	35	2094	0.31	0.0058
GO:0032501	Multicellular organismal process	Cd24,Psap,Tpt1,Suds3,Col6a2,Zak,Igfbp7,Popdc2,Hexim1,Tapt1,Timp2,Serpinf1,Itgb1bp2,Col3a1,Col5a2,Dnajb9,Lum,Actr2,Mapt,Mgp,Cav3,Ppp2ca,Hectd1,Cav1,Casq1,Atp5g1,Mnat1,C1galt1,Fkbp1a,Akr1b1,Acadm,Lgals1,Col1a2,Postn,Ldha,Sparc,Myl1,Ctsh,Bzw1,Mfap5,Nol3,Cul3,Tab2,Slc12a2,Ppib,Serpinh1,Eno1,Tpm1,Park7,Ap3d1,Trak1,Eif4e2,Col6a3,Actn3,Sypl2,Nrep,Cd81,Kcnj11,Gpi,Ddx3x,Nrap,Slc38a2,Aldoa,Pkn2,Alkbh5,Cacn…	97	8527	0.14	0.0058
GO:0009725	Response to hormone	Cd24,Timp2,Serpinf1,Mgp,Ppp2ca,Cav1,Akr1b1,Acadm,Col1a2,Txn1,Ldha,Sparc,Ctsh,Sorbs1,Gpi,Aldoa,Pfkfb1,Anxa2,ND3,CYTB,Kat2b,Rab12,ENSRNOP00000067246	23	1105	0.4	0.0061
GO:0045214	Sarcomere organization	Casq1,Tpm1,Ttn,Tnnt3,Six4	5	45	1.13	0.0066
GO:0043270	Positive regulation of ion transport	Cav1,Casq1,Slc12a2,Park7,Kcnj11,Cacna2d1,Dlg1,Atf4,Calm1,Tmsb4x,Dtnbp1,ENSRNOP00000067246	12	358	0.61	0.0067
GO:0061024	Membrane organization	Cd24,Psap,Rilpl1,Ubxn2a,Cav3,Cav1,Tmem43,Slc25a5,Nol3,Cul3,Ap3d1,Sypl2,Tmed9,Anxa2,Dlg1,Rab12,Calm1,Mia3	18	746	0.47	0.0068
GO:0071310	Cellular response to organic substance	Psap,Pcolce,Timp2,Serpinf1,Col3a1,Col5a2,Actr2,Ubxn2a,Cav3,Ppp2ca,Cav1,Atp5g1,Fkbp1a,Akr1b1,Lgals1,Slc25a5,Col1a2,Txn1,Postn,Sparc,Ctsh,Ifitm3,Sorbs1,Cul3,Slc12a2,Eno1,Park7,Kcnj11,Riok3,Cacna2d1,Six1,ND3,Actb,Col4a1,Kat2b,Rab12,Atf4,Tmsb4x	38	2385	0.29	0.0068
GO:0010638	Positive regulation of organelle organization	Nek7,Tapt1,Actr2,Mapt,Cav3,Dstn,Cav1,Arpc5l,Cul3,Tpm1,Tmed9,Anxa2,Dlg1,Kat2b,Dynll1,Pfn2,Palld	17	679	0.48	0.007
GO:0098903	Regulation of membrane repolarization during action potential	Cav1,Cacna2d1,Dlg1	3	7	1.72	0.0072
GO:0009612	Response to mechanical stimulus	Col3a1,Mgp,Cav3,Cav1,Postn,Slc12a2,Gpi,Slc38a2,Ttn,Actb,Atp5g3	11	307	0.64	0.0074
GO:0007517	Muscle organ development	Popdc2,Itgb1bp2,Col3a1,Cav1,Casq1,Fkbp1a,Tpm1,Col6a3,Ttn,Six1,Six4	11	311	0.63	0.0082
GO:0071840	Cellular component organization or biogenesis	Cd24,Psap,Rilpl1,Suds3,Zak,Mfap4,Tapt1,Col3a1,Col5a2,Lum,Actr2,Ubxn2a,Mapt,Mgp,Cav3,Dstn,Cav1,Casq1,Atp5g1,Tmem43,Fkbp1a,Ndufb9,Eif4b,Cnn3,Slc25a5,Col1a2,Col15a1,Postn,Arpc5l,Mfap5,Nol3,Mreg,Sorbs1,Cul3,Slc12a2,Serpinh1,Tpm1,Park7,Ap3d1,Trak1,Col6a3,Sypl2,Nrep,Nrap,Tmed9,Aldoa,Riok3,Pkn2,Ttn,Anxa2,Golga4,Actb,LOC685596,Tnnt3,Six4,Csde1,Col4a1,Atp5g3,Dlg1,Ccdc80,Kat2b,Rab12,Ptpla,Dynll1,Pfn2,Palld…	75	6148	0.17	0.0086
GO:0016051	Carbohydrate biosynthetic process	Phkg1,Pgk1,Akr1b1,Acadm,Ppp1r3c,Gpi,Atf4	7	119	0.85	0.009
GO:0034762	Regulation of transmembrane transport	Cav3,Ppp2ca,Cav1,Casq1,Arl6ip5,Fkbp1a,Nol3,Sorbs1,Park7,Kcnj11,Cacna2d1,Actb,Dlg1,Calm1,Tmsb4x,ENSRNOP00000067246	16	630	0.49	0.0093
GO:0065007	Biological regulation	Cd24,Psap,Rhobtb1,Nek7,Rabgef1,Tpt1,Rilpl1,Suds3,Sumo3,Pcolce,Zak,Igfbp7,Mfap4,Pgk1,Popdc2,Hexim1,Tapt1,Timp2,Serpinf1,Asb11,Itgb1bp2,Col3a1,Col5a2,Cd55,Dnajb9,Eno3,Lum,Sos2,Actr2,Ubxn2a,Mapt,Strn3,Mgp,Phf20l1,Cav3,Ppp2ca,Dstn,Hectd1,Ppia,Cav1,Casq1,Atp5g1,Mnat1,Arl6ip5,Nrd1,Faf1,Ifi27,Fkbp1a,Pabpc1,Akr1b1,Naa38,Acadm,Lgals1,Eif4b,Cnn3,Slc25a5,Col1a2,Txn1,Zfp91,Uaca,Postn,Ldha,Sparc,Ctsh,Arpc5l,I…	142	14272	0.08	0.0094
GO:0031579	Membrane raft organization	Cav3,Cav1,Anxa2,Dlg1	4	25	1.29	0.0095
GO:0097066	Response to thyroid hormone	Akr1b1,Col1a2,Txn1,Ctsh,Anxa2	5	51	1.08	0.0101
GO:1902905	Positive regulation of supramolecular fiber organization	Actr2,Mapt,Cav3,Dstn,Cav1,Arpc5l,Tpm1,Dlg1,Pfn2	9	214	0.71	0.0101
GO:0051338	Regulation of transferase activity	Cd24,Nek7,Zak,Hexim1,Mapt,Cav3,Ppp2ca,Cav1,Mnat1,Zfp91,Tab2,Park7,Cd81,Ttn,Pfkfb1,Actb,Socs6,Dlg1,Kat2b,Lmo4,Cdkn1c,Dtnbp1	22	1081	0.39	0.0107
GO:1902532	Negative regulation of intracellular signal transduction	Rabgef1,Tpt1,Timp2,Cav3,Cav1,Uaca,Nol3,Cul3,Eno1,Park7,Actn3,Riok3,Dlg1,Calm1,Tmsb4x	15	575	0.5	0.0112
GO:0006811	Ion transport	Psap,Ndufa4,Slc38a4,Cav1,Atp5g1,Arl6ip5,Fkbp1a,Slc25a5,Nol3,Slc12a2,Park7,Cox5a,Ap3d1,Cox6a2,Kcnj11,Atp5j2,Slc38a2,Cacna2d1,Fth1,Anxa2,COX1,COX2,CYTB,Pnpla8,Atp5g3,ENSRNOP00000067246	26	1408	0.35	0.0113
GO:0043462	Regulation of atpase activity	Mnat1,Cnn3,Tpm1,Tnnt3,Dynll1,Pfn2	6	86	0.93	0.0113
GO:0045937	Positive regulation of phosphate metabolic process	Cd24,Psap,Zak,Pgk1,Timp2,Ppp2ca,Cav1,Mnat1,Arl6ip5,Txn1,Zfp91,Tab2,Eno1,Park7,Cd81,Pfkfb1,Anxa2,COX2,Dlg1,Pfn2,Lmo4,Calm1,Tmsb4x,Dtnbp1	24	1249	0.37	0.0117
GO:0051098	Regulation of binding	Sumo3,Ppp2ca,Cav1,Fkbp1a,Txn1,Eno1,Park7,Anxa2,Actb,Kat2b,Calm1,Tmsb4x,Dtnbp1	13	449	0.55	0.0117
GO:1903206	Negative regulation of hydrogen peroxide-induced cell death	Psap,Txn1,Nol3,Park7	4	27	1.26	0.0117
GO:0048878	Chemical homeostasis	Cd24,Serpinf1,Cav3,Ppp2ca,Cav1,Casq1,Fkbp1a,Akr1b1,Lgals1,Txn1,Ctsh,Nol3,Slc12a2,Park7,Ap3d1,Sypl2,Kcnj11,Gpi,Cacna2d1,Fth1,Pnpla8,Atf4,Calm1,ENSRNOP00000067246	24	1255	0.37	0.0119
GO:0009887	Animal organ morphogenesis	Col6a2,Col3a1,Col5a2,Cav3,Cav1,Fkbp1a,Col1a2,Ctsh,Mfap5,Cul3,Slc12a2,Serpinh1,Tpm1,Col6a3,Actn3,Ttn,Six1,Six4,Dlg1,Ptpla,Atf4,Cpe	22	1099	0.39	0.0122
GO:0034765	Regulation of ion transmembrane transport	Cav3,Ppp2ca,Cav1,Casq1,Arl6ip5,Fkbp1a,Nol3,Park7,Kcnj11,Cacna2d1,Dlg1,Calm1,Tmsb4x,ENSRNOP00000067246	14	523	0.51	0.0133
GO:0051099	Positive regulation of binding	Ppp2ca,Cav1,Fkbp1a,Txn1,Eno1,Park7,Anxa2,Kat2b,Calm1	9	226	0.69	0.0133
GO:0071417	Cellular response to organonitrogen compound	Col3a1,Col5a2,Actr2,Cav3,Ppp2ca,Cav1,Atp5g1,Akr1b1,Col1a2,Sorbs1,Cacna2d1,Six1,Actb,Col4a1,Kat2b,Rab12,Atf4	17	730	0.45	0.0133
GO:1901699	Cellular response to nitrogen compound	Col3a1,Col5a2,Actr2,Cav3,Ppp2ca,Cav1,Atp5g1,Akr1b1,Col1a2,Sorbs1,Riok3,Cacna2d1,Six1,Actb,Col4a1,Kat2b,Rab12,Atf4	18	803	0.44	0.0133
GO:1903202	Negative regulation of oxidative stress-induced cell death	Psap,Txn1,Nol3,Park7,Atf4	5	56	1.04	0.0133
GO:0051130	Positive regulation of cellular component organization	Cd24,Nek7,Tapt1,Serpinf1,Actr2,Mapt,Cav3,Dstn,Cav1,Atp5g1,Faf1,Arpc5l,Cul3,Tpm1,Park7,Trak1,Tmed9,Anxa2,Golga4,Dlg1,Kat2b,Dynll1,Pfn2,Palld,Dtnbp1	25	1356	0.35	0.014
GO:1903169	Regulation of calcium ion transmembrane transport	Cav3,Ppp2ca,Casq1,Fkbp1a,Nol3,Cacna2d1,Calm1,ENSRNOP00000067246	8	179	0.74	0.0141
GO:0031325	Positive regulation of cellular metabolic process	Cd24,Psap,Nek7,Sumo3,Pcolce,Zak,Pgk1,Timp2,Lum,Actr2,Mapt,Strn3,Ppp2ca,Cav1,Mnat1,Arl6ip5,Nrd1,Faf1,Fkbp1a,Pabpc1,Txn1,Zfp91,Uaca,Ctsh,Sorbs1,Cul3,Tab2,Eno1,Park7,Ap3d1,Actn3,Cd81,Slc38a2,Pfkfb1,Six1,Anxa2,Gpbp1,COX2,Six4,Vezf1,Dlg1,Kat2b,Rab12,Atf4,Pfn2,Lmo4,Calm1,Tmsb4x,Dtnbp1,Rps4x,Tnni2	51	3762	0.22	0.0142
GO:0032273	Positive regulation of protein polymerization	Actr2,Mapt,Cav3,Cav1,Arpc5l,Dlg1,Pfn2	7	134	0.8	0.0144
GO:0014706	Striated muscle tissue development	Popdc2,Cav3,Cav1,Casq1,Fkbp1a,Acadm,Tpm1,Nrap,Ttn,Six1,Six4	11	343	0.59	0.0145
GO:0035994	Response to muscle stretch	Cav3,Gpi,Ttn,Atp5g3	4	30	1.21	0.0145
GO:0051235	Maintenance of location	Tapt1,Cav1,Faf1,Txn1,Park7,Fth1,Tmsb4x,ENSRNOP00000067246	8	182	0.73	0.0149
GO:0071230	Cellular response to amino acid stimulus	Col3a1,Col5a2,Atp5g1,Col1a2,Six1,Col4a1	6	94	0.89	0.0149
GO:0080090	Regulation of primary metabolic process	Cd24,Psap,Nek7,Rabgef1,Suds3,Sumo3,Pcolce,Zak,Igfbp7,Hexim1,Timp2,Serpinf1,Asb11,Lum,Actr2,Ubxn2a,Mapt,Strn3,Phf20l1,Cav3,Ppp2ca,Cav1,Mnat1,Arl6ip5,Nrd1,Faf1,Fkbp1a,Pabpc1,Acadm,Eif4b,Txn1,Zfp91,Uaca,Ctsh,Nol3,Sorbs1,Cul3,Tab2,Serpinh1,Eno1,Park7,Ppp1r3c,Ap3d1,Hhatl,Eif4e2,Col6a3,Actn3,Cd81,Gpi,Slc38a2,Alkbh5,Ttn,Pfkfb1,Ube2v1,Rfx7,Six1,Anxa2,Gpbp1,Actb,COX2,Six4,Vezf1,Socs6,Dlg1,Kat2b,Atf4,Pfn2,…	77	6520	0.16	0.0149
GO:0032411	Positive regulation of transporter activity	Casq1,Park7,Kcnj11,Cacna2d1,Calm1,Tmsb4x,ENSRNOP00000067246	7	136	0.8	0.015
GO:0051049	Regulation of transport	Rabgef1,Mapt,Cav3,Ppp2ca,Cav1,Casq1,Arl6ip5,Fkbp1a,Slc25a5,Txn1,Uaca,Nol3,Sorbs1,Slc12a2,Park7,Lamp1,Cd81,Kcnj11,Gpi,Cacna2d1,Ttn,Anxa2,Actb,Dlg1,Rab12,Atf4,Dynll1,Pfn2,Calm1,Ensa,Tmsb4x,Dtnbp1,ENSRNOP00000067246	33	2063	0.29	0.0151
GO:0001765	Membrane raft assembly	Cav3,Cav1,Anxa2	3	11	1.52	0.0153
GO:0031295	T cell costimulation	Cd24,Cav1,Lgals1,Cd81	4	31	1.2	0.0153
GO:0031323	Regulation of cellular metabolic process	Cd24,Psap,Nek7,Rabgef1,Suds3,Sumo3,Pcolce,Zak,Pgk1,Hexim1,Timp2,Serpinf1,Lum,Actr2,Ubxn2a,Mapt,Strn3,Phf20l1,Cav3,Ppp2ca,Cav1,Atp5g1,Mnat1,Arl6ip5,Nrd1,Faf1,Fkbp1a,Pabpc1,Acadm,Eif4b,Txn1,Zfp91,Uaca,Ctsh,Nol3,Sorbs1,Cul3,Tab2,Serpinh1,Eno1,Park7,Ppp1r3c,Ap3d1,Hhatl,Eif4e2,Col6a3,Actn3,Cd81,Gpi,Slc38a2,Alkbh5,Ttn,Pfkfb1,Ube2v1,Rfx7,Six1,Anxa2,Gpbp1,Actb,COX2,Six4,Vezf1,Socs6,Dlg1,Kat2b,Rab12,Atf4,…	79	6753	0.15	0.0153
GO:0051336	Regulation of hydrolase activity	Psap,Pcolce,Timp2,Serpinf1,Ppp2ca,Cav1,Mnat1,Arl6ip5,Nrd1,Fkbp1a,Cnn3,Uaca,Ctsh,Nol3,Serpinh1,Tpm1,Park7,Col6a3,Gpi,Anxa2,Tnnt3,Dynll1,Pfn2,Calm1,Ensa	25	1373	0.35	0.0153
GO:0032387	Negative regulation of intracellular transport	Mapt,Ppp2ca,Txn1,Nol3,Park7	5	60	1.01	0.0156
GO:0005996	Monosaccharide metabolic process	Pgk1,Akr1b1,Ldha,Eno1,Kcnj11,Gpi,Aldoa,Pfkfb1,Atf4,LOC108351137	10	292	0.62	0.0159
GO:0032880	Regulation of protein localization	Sumo3,Mapt,Ppp2ca,Hectd1,Fkbp1a,Txn1,Uaca,Nol3,Sorbs1,Slc12a2,Park7,Cd81,Kcnj11,Gpi,Ttn,Six1,Actb,Six4,Dlg1,Dynll1,Ensa	21	1056	0.38	0.0159
GO:0050793	Regulation of developmental process	Cd24,Tpt1,Pgk1,Tapt1,Timp2,Serpinf1,Col3a1,Col5a2,Sos2,Actr2,Mapt,Mgp,Cav3,Ppp2ca,Cav1,Atp5g1,Lgals1,Postn,Sparc,Ctsh,Slc12a2,Ppib,Tpm1,Ap3d1,Trak1,Actn3,Nrep,Aldoa,Six1,Anxa2,Golga4,Adig,Six4,Vezf1,Dlg1,Kat2b,Atf4,Cpe,Lmo4,Hmgn2,Cdkn1c,Dtnbp1	42	2912	0.24	0.0159
GO:0007010	Cytoskeleton organization	Zak,Actr2,Mapt,Cav3,Dstn,Cav1,Casq1,Cnn3,Arpc5l,Sorbs1,Cul3,Tpm1,Nrap,Ttn,Actb,Tnnt3,Six4,Dlg1,Pfn2,Palld,Calm1,LOC108351137,Tmsb4x,Dtnbp1	24	1304	0.35	0.0169
GO:0032269	Negative regulation of cellular protein metabolic process	Rabgef1,Hexim1,Timp2,Serpinf1,Mapt,Cav3,Ppp2ca,Cav1,Fkbp1a,Nol3,Serpinh1,Park7,Hhatl,Eif4e2,Col6a3,Gpi,Anxa2,Dlg1,Kat2b,Atf4,Ensa,Cdkn1c,Dtnbp1	23	1222	0.36	0.0169
GO:0019222	Regulation of metabolic process	Cd24,Psap,Nek7,Rabgef1,Suds3,Sumo3,Pcolce,Zak,Igfbp7,Mfap4,Pgk1,Hexim1,Timp2,Serpinf1,Asb11,Lum,Actr2,Ubxn2a,Mapt,Strn3,Phf20l1,Cav3,Ppp2ca,Cav1,Atp5g1,Mnat1,Arl6ip5,Nrd1,Faf1,Fkbp1a,Pabpc1,Acadm,Eif4b,Txn1,Zfp91,Uaca,Postn,Ctsh,Nol3,Sorbs1,Cul3,Tab2,Serpinh1,Eno1,Park7,Ppp1r3c,Ap3d1,Hhatl,Eif4e2,Col6a3,Actn3,Cd81,Gpi,Slc38a2,Riok3,Alkbh5,Ttn,Pfkfb1,Ube2v1,Rfx7,Six1,Anxa2,Gpbp1,Actb,COX2,Six4,Csd…	85	7460	0.14	0.0172
GO:0048523	Negative regulation of cellular process	Cd24,Psap,Rabgef1,Tpt1,Suds3,Zak,Hexim1,Timp2,Serpinf1,Col3a1,Col5a2,Dnajb9,Mapt,Strn3,Cav3,Ppp2ca,Hectd1,Cav1,Atp5g1,Mnat1,Arl6ip5,Fkbp1a,Pabpc1,Akr1b1,Naa38,Lgals1,Slc25a5,Txn1,Uaca,Postn,Sparc,Ctsh,Nol3,Cul3,Serpinh1,Eno1,Tpm1,Park7,Hhatl,Eif4e2,Col6a3,Actn3,Kcnj11,Gpi,Riok3,Six1,Fth1,Anxa2,Heca,Six4,Socs6,Dlg1,Kat2b,Atf4,Dynll1,Pfn2,Lmo4,Calm1,Ensa,Hmgn2,Rpl24,Tmsb4x,Cdkn1c,Dtnbp1,Dpt	65	5264	0.18	0.0172
GO:0048729	Tissue morphogenesis	Col6a2,Col3a1,Mgp,Hectd1,Fkbp1a,Ctsh,Slc12a2,Tpm1,Col6a3,Gpi,Ttn,Six1,Actb,Col4a1,Dlg1,Lmo4	16	687	0.45	0.0172
GO:0009150	Purine ribonucleotide metabolic process	Pgk1,Eno3,Atp5g1,Nudt4,Eno1,Ampd1,Atp5j2,Gpi,Aldoa,Atp5g3,LOC108351137,Ak1	12	418	0.54	0.0174
GO:0010941	Regulation of cell death	Cd24,Psap,Tpt1,Rilpl1,Suds3,Zak,Serpinf1,Mapt,Ppp2ca,Cav1,Atp5g1,Mnat1,Arl6ip5,Faf1,Akr1b1,Naa38,Slc25a5,Txn1,Uaca,Ldha,Ctsh,Nol3,Eno1,Park7,Gpi,Six1,Fth1,COX2,Six4,Atf4,Dtnbp1	31	1915	0.29	0.0179
GO:0045185	Maintenance of protein location	Tapt1,Cav1,Faf1,Txn1,Park7,Tmsb4x	6	100	0.86	0.0179
GO:0097190	Apoptotic signaling pathway	Cd24,Mapt,Cav1,Arl6ip5,Ifi27,Uaca,Nol3,Lamp1,Atf4,ENSRNOP00000067246	10	299	0.61	0.0179
GO:0007423	Sensory organ development	Psap,Igfbp7,Serpinf1,Col5a2,Sparc,Mfap5,Six1,Actb,Six4,Col4a1,Dlg1,Pvalb,Atf4,Rpl24,Cdkn1c,Dtnbp1	16	695	0.45	0.0187
GO:0051495	Positive regulation of cytoskeleton organization	Actr2,Mapt,Cav3,Dstn,Cav1,Arpc5l,Tpm1,Dlg1,Pfn2	9	245	0.65	0.0187
GO:0051649	Establishment of localization in cell	Cd24,Psap,Rabgef1,Rilpl1,Actr2,Mapt,Fkbp1a,Xpo7,Nol3,Mreg,Cul3,Ppib,Park7,Ap3d1,Trak1,Lamp1,Atp5j2,Tmed9,Kpna3,Alkbh5,Cacna2d1,Actb,Dlg1,Rab12,Dynll1,Calm1,Mia3,Dtnbp1,ENSRNOP00000067246	29	1745	0.31	0.0187
GO:0055082	Cellular chemical homeostasis	Cd24,Serpinf1,Cav3,Ppp2ca,Cav1,Casq1,Fkbp1a,Lgals1,Txn1,Nol3,Slc12a2,Sypl2,Kcnj11,Cacna2d1,Fth1,Atf4,Calm1,ENSRNOP00000067246	18	843	0.41	0.0187
GO:0080135	Regulation of cellular response to stress	Psap,Tpt1,Zak,Dnajb9,Actr2,Mapt,Cav3,Cav1,Arl6ip5,Txn1,Nol3,Eno1,Park7,Slc38a2,Dlg1,Atf4,Dtnbp1	17	769	0.43	0.0187
GO:0044087	Regulation of cellular component biogenesis	Cd24,Tapt1,Actr2,Mapt,Cav3,Cav1,Faf1,Arpc5l,Nol3,Tpm1,Park7,Riok3,Six1,Six4,Dlg1,Kat2b,Dynll1,Pfn2,Palld,Lmo4,Tmsb4x	21	1079	0.37	0.019
GO:0052548	Regulation of endopeptidase activity	Timp2,Serpinf1,Ppp2ca,Arl6ip5,Nrd1,Uaca,Ctsh,Nol3,Serpinh1,Park7,Col6a3,Gpi,Anxa2	13	492	0.51	0.0195
GO:0009893	Positive regulation of metabolic process	Cd24,Psap,Nek7,Sumo3,Pcolce,Zak,Pgk1,Timp2,Asb11,Lum,Actr2,Mapt,Strn3,Ppp2ca,Cav1,Mnat1,Arl6ip5,Nrd1,Faf1,Fkbp1a,Pabpc1,Txn1,Zfp91,Uaca,Postn,Ctsh,Sorbs1,Cul3,Tab2,Eno1,Park7,Ap3d1,Actn3,Cd81,Slc38a2,Riok3,Ttn,Pfkfb1,Six1,Anxa2,Gpbp1,COX2,Six4,Vezf1,Dlg1,Kat2b,Rab12,Atf4,Pfn2,Lmo4,Calm1,Tmsb4x,Dtnbp1,Rps4x,Tnni2	55	4260	0.2	0.02
GO:0060306	Regulation of membrane repolarization	Cav3,Cav1,Cacna2d1,Dlg1	4	35	1.14	0.02
GO:0006915	Apoptotic process	Cd24,Suds3,Ebag9,Mapt,Cav1,Arl6ip5,Faf1,Ifi27,Lgals1,Uaca,Ctsh,Nol3,Cul3,Lamp1,Pkn2,Six1,Atf4,Dynll1,LOC108351137,ENSRNOP00000067246	20	1007	0.38	0.0201
GO:0032271	Regulation of protein polymerization	Actr2,Mapt,Cav3,Cav1,Arpc5l,Tpm1,Dlg1,Pfn2,Tmsb4x	9	250	0.64	0.0201
GO:0033043	Regulation of organelle organization	Nek7,Tapt1,Eno3,Actr2,Mapt,Cav3,Dstn,Cav1,Mnat1,Slc25a5,Arpc5l,Nol3,Cul3,Eno1,Tpm1,Park7,Tmed9,Anxa2,Dlg1,Kat2b,Dynll1,Pfn2,Palld,Tmsb4x,Cdkn1c	25	1415	0.33	0.0201
GO:1902531	Regulation of intracellular signal transduction	Cd24,Psap,Rabgef1,Tpt1,Zak,Hexim1,Timp2,Col3a1,Sos2,Mapt,Cav3,Cav1,Arl6ip5,Fkbp1a,Zfp91,Uaca,Nol3,Cul3,Tab2,Eno1,Park7,Actn3,Cd81,Riok3,Ube2v1,Dlg1,Calm1,Tmsb4x,Dtnbp1	29	1762	0.3	0.0202
GO:0034220	Ion transmembrane transport	Ndufa4,Slc38a4,Atp5g1,Arl6ip5,Fkbp1a,Slc25a5,Nol3,Slc12a2,Cox5a,Cox6a2,Kcnj11,Atp5j2,Slc38a2,Cacna2d1,Anxa2,COX1,COX2,CYTB,Atp5g3,ENSRNOP00000067246	20	1010	0.38	0.0204
GO:0048646	Anatomical structure formation involved in morphogenesis	Psap,Cav3,Hectd1,Cav1,Casq1,C1galt1,Fkbp1a,Cul3,Tpm1,Cd81,Gpi,Nrap,Ttn,Six1,Anxa2,Tnnt3,Six4,Vezf1,Col4a1,Lmo4	20	1010	0.38	0.0204
GO:0006900	Vesicle budding from membrane	Cul3,Ap3d1,Tmed9,Anxa2,Mia3	5	67	0.96	0.0209
GO:0050794	Regulation of cellular process	Cd24,Psap,Rhobtb1,Nek7,Rabgef1,Tpt1,Rilpl1,Suds3,Sumo3,Pcolce,Zak,Igfbp7,Pgk1,Hexim1,Tapt1,Timp2,Serpinf1,Asb11,Itgb1bp2,Col3a1,Col5a2,Dnajb9,Eno3,Lum,Sos2,Actr2,Ubxn2a,Mapt,Strn3,Phf20l1,Cav3,Ppp2ca,Dstn,Hectd1,Cav1,Casq1,Atp5g1,Mnat1,Arl6ip5,Nrd1,Faf1,Ifi27,Fkbp1a,Pabpc1,Akr1b1,Naa38,Acadm,Lgals1,Eif4b,Slc25a5,Col1a2,Txn1,Zfp91,Uaca,Postn,Ldha,Sparc,Ctsh,Arpc5l,Ifitm3,Ogn,Nol3,Sorbs1,Cul3,Tab2,…	130	12977	0.09	0.0211
GO:0002027	Regulation of heart rate	Popdc2,Cav3,Cav1,Tpm1,Cacna2d1,Calm1	6	107	0.83	0.0222
GO:1904396	Regulation of neuromuscular junction development	Sorbs1,Six1,Six4	3	14	1.42	0.0222
GO:0071709	Membrane assembly	Psap,Cav3,Cav1,Anxa2	4	37	1.12	0.0225
GO:0030162	Regulation of proteolysis	Sumo3,Pcolce,Timp2,Serpinf1,Ppp2ca,Cav1,Arl6ip5,Nrd1,Uaca,Ctsh,Nol3,Cul3,Serpinh1,Eno1,Park7,Col6a3,Gpi,Anxa2	18	868	0.4	0.0228
GO:0032507	Maintenance of protein location in cell	Tapt1,Cav1,Txn1,Park7,Tmsb4x	5	69	0.95	0.0228
GO:0045936	Negative regulation of phosphate metabolic process	Rabgef1,Hexim1,Mapt,Cav3,Ppp2ca,Cav1,Fkbp1a,Park7,Actn3,Dlg1,Kat2b,Dynll1,Ensa,Cdkn1c,Dtnbp1	15	645	0.45	0.0228
GO:0051247	Positive regulation of protein metabolic process	Cd24,Psap,Sumo3,Pcolce,Zak,Timp2,Asb11,Ppp2ca,Cav1,Mnat1,Arl6ip5,Nrd1,Faf1,Fkbp1a,Txn1,Zfp91,Uaca,Ctsh,Cul3,Tab2,Eno1,Park7,Cd81,Anxa2,Dlg1,Kat2b,Pfn2,Calm1,Dtnbp1,Rps4x	30	1875	0.29	0.0232
GO:0009749	Response to glucose	Col6a2,Serpinf1,Ppp2ca,Lgals1,Txn1,Ldha,Kcnj11,Ensa	8	205	0.68	0.0237
GO:0019318	Hexose metabolic process	Pgk1,Ldha,Eno1,Kcnj11,Gpi,Aldoa,Pfkfb1,Atf4,LOC108351137	9	260	0.62	0.0239
GO:0034766	Negative regulation of ion transmembrane transport	Cav3,Ppp2ca,Cav1,Arl6ip5,Park7,Calm1	6	110	0.82	0.0239
GO:0008219	Cell death	Cd24,Suds3,Ebag9,Mapt,Cav1,Arl6ip5,Faf1,Ifi27,Lgals1,Uaca,Ctsh,Nol3,Cul3,Lamp1,Pkn2,Six1,Pnpla8,Atf4,Dynll1,LOC108351137,ENSRNOP00000067246	21	1114	0.36	0.0243
GO:0032270	Positive regulation of cellular protein metabolic process	Cd24,Psap,Sumo3,Pcolce,Zak,Timp2,Ppp2ca,Cav1,Mnat1,Arl6ip5,Nrd1,Faf1,Fkbp1a,Txn1,Zfp91,Uaca,Ctsh,Cul3,Tab2,Eno1,Park7,Cd81,Anxa2,Dlg1,Kat2b,Pfn2,Calm1,Dtnbp1,Rps4x	29	1795	0.29	0.0243
GO:0032535	Regulation of cellular component size	Actr2,Mapt,Cav3,Dstn,Atp5g1,Arpc5l,Slc12a2,Tpm1,Golga4,Dlg1,Pfn2,Tmsb4x	12	446	0.52	0.0243
GO:0034118	Regulation of erythrocyte aggregation	Cd24,Lgals1	2	2	2.09	0.0243
GO:0044089	Positive regulation of cellular component biogenesis	Cd24,Tapt1,Actr2,Mapt,Cav3,Cav1,Faf1,Arpc5l,Tpm1,Park7,Dlg1,Dynll1,Pfn2,Palld	14	582	0.47	0.0243
GO:0043269	Regulation of ion transport	Cav3,Ppp2ca,Cav1,Casq1,Arl6ip5,Fkbp1a,Nol3,Slc12a2,Park7,Kcnj11,Cacna2d1,Dlg1,Atf4,Calm1,Tmsb4x,Dtnbp1,ENSRNOP00000067246	17	802	0.41	0.0245
GO:0009142	Nucleoside triphosphate biosynthetic process	Atp5g1,Atp5j2,Aldoa,Atp5g3,Ak1	5	72	0.93	0.0253
GO:0044057	Regulation of system process	Popdc2,Cav3,Cav1,Casq1,Nol3,Eno1,Tpm1,Actn3,Cacna2d1,Ttn,Tnnt3,Dlg1,Calm1,ENSRNOP00000067246,Tnni2	15	659	0.44	0.0258
GO:0051050	Positive regulation of transport	Cav3,Cav1,Casq1,Uaca,Sorbs1,Slc12a2,Park7,Lamp1,Cd81,Kcnj11,Gpi,Cacna2d1,Ttn,Anxa2,Dlg1,Atf4,Dynll1,Calm1,Tmsb4x,Dtnbp1,ENSRNOP00000067246	21	1122	0.36	0.0258
GO:0048585	Negative regulation of response to stimulus	Cd24,Psap,Rabgef1,Tpt1,Timp2,Serpinf1,Col3a1,Cd55,Dnajb9,Strn3,Cav3,Cav1,Slc25a5,Txn1,Uaca,Nol3,Cul3,Slc12a2,Eno1,Park7,Actn3,Riok3,Anxa2,Socs6,Dlg1,Atf4,Calm1,Tmsb4x	28	1719	0.3	0.026
GO:1901701	Cellular response to oxygen-containing compound	Serpinf1,Col3a1,Col5a2,Actr2,Ppp2ca,Cav1,Atp5g1,Akr1b1,Lgals1,Col1a2,Txn1,Sorbs1,Tpm1,Park7,Kcnj11,Slc38a2,Cacna2d1,Six1,Actb,Col4a1,Kat2b,Rab12,Atf4	23	1291	0.34	0.0266
GO:0072657	Protein localization to membrane	Cd24,Rabgef1,Rilpl1,Cav3,Ap3d1,Cd81,Anxa2,Golga4,Dlg1,Rab12,Cpe,Calm1	12	454	0.51	0.0269
GO:0014902	Myotube differentiation	Cav3,Cd81,Six1,Six4,Ptpla	5	74	0.92	0.0272
GO:0019725	Cellular homeostasis	Cd24,Serpinf1,Cav3,Ppp2ca,Cav1,Casq1,Fkbp1a,Lgals1,Txn1,Nol3,Slc12a2,Sypl2,Kcnj11,Aldoa,Cacna2d1,Fth1,Atf4,Calm1,ENSRNOP00000067246	19	968	0.38	0.0272
GO:0042176	Regulation of protein catabolic process	Sumo3,Timp2,Asb11,Ubxn2a,Ppp2ca,Cav1,Nrd1,Faf1,Cul3,Park7,Cd81,Anxa2	12	456	0.51	0.0276
GO:0009117	Nucleotide metabolic process	Pgk1,Eno3,Atp5g1,Nudt4,Eno1,Park7,Ampd1,Atp5j2,Gpi,Aldoa,Atp5g3,LOC108351137,Ak1	13	524	0.48	0.0277
GO:0045859	Regulation of protein kinase activity	Cd24,Zak,Hexim1,Cav3,Ppp2ca,Cav1,Mnat1,Zfp91,Tab2,Park7,Cd81,Ttn,Actb,Dlg1,Kat2b,Cdkn1c,Dtnbp1	17	816	0.4	0.0279
GO:0001655	Urogenital system development	Cd24,Psap,Serpinf1,C1galt1,Akr1b1,Ctsh,Six1,Six4,Col4a1,Dlg1,Cdkn1c	11	395	0.53	0.0296
GO:0010917	Negative regulation of mitochondrial membrane potential	Mapt,Atp5g1,Arl6ip5	3	17	1.33	0.0308
GO:0070482	Response to oxygen levels	Cd24,Pgk1,Cav1,Txn1,Postn,Ldha,Nol3,Eno1,Aldoa,Alkbh5,CYTB,Atf4	12	463	0.5	0.0308
GO:0032413	Negative regulation of ion transmembrane transporter activity	Cav3,Ppp2ca,Cav1,Park7,Calm1	5	77	0.9	0.0312
GO:0072384	Organelle transport along microtubule	Mapt,Mreg,Ap3d1,Trak1,Dtnbp1	5	77	0.9	0.0312
GO:0001101	Response to acid chemical	Col3a1,Col5a2,Atp5g1,Akr1b1,Col1a2,Txn1,Six1,Col4a1	8	220	0.65	0.0322
GO:0046031	ADP metabolic process	Pgk1,Eno3,Eno1,Gpi,Aldoa,LOC108351137,Ak1	7	168	0.71	0.0327
GO:0090066	Regulation of anatomical structure size	Actr2,Mapt,Cav3,Dstn,Cav1,Atp5g1,Arpc5l,Slc12a2,Tpm1,Golga4,Dlg1,Kat2b,Pfn2,Tmsb4x	14	608	0.45	0.033
GO:2001171	Positive regulation of atp biosynthetic process	Eno1,COX2,Tmsb4x	3	18	1.31	0.0344
GO:0031448	Positive regulation of fast-twitch skeletal muscle fiber contraction	Actn3,ENSRNOP00000067246	2	3	1.91	0.035
GO:0061055	Myotome development	Six1,Six4	2	3	1.91	0.035
GO:0009060	Aerobic respiration	Cox5a,Cox6a2,COX1,LOC685596,ND1	5	80	0.88	0.0351
GO:0070534	Protein k63-linked ubiquitination	Hectd1,Ube2g1,Zfp91,Ube2v1	4	45	1.03	0.036
GO:0051051	Negative regulation of transport	Rabgef1,Mapt,Cav3,Ppp2ca,Cav1,Arl6ip5,Slc25a5,Txn1,Nol3,Park7,Kcnj11,Atf4,Calm1	13	546	0.46	0.0371
GO:0031399	Regulation of protein modification process	Cd24,Psap,Rabgef1,Zak,Hexim1,Timp2,Ubxn2a,Mapt,Cav3,Ppp2ca,Cav1,Mnat1,Arl6ip5,Fkbp1a,Txn1,Zfp91,Cul3,Tab2,Park7,Hhatl,Cd81,Ttn,Anxa2,Actb,Dlg1,Kat2b,Pfn2,Calm1,Ensa,Cdkn1c,Dtnbp1	31	2048	0.27	0.038
GO:0072001	Renal system development	Cd24,Serpinf1,C1galt1,Akr1b1,Ctsh,Six1,Six4,Col4a1,Dlg1,Cdkn1c	10	347	0.55	0.0381
GO:0010256	Endomembrane system organization	Psap,Ubxn2a,Cav3,Cav1,Casq1,Tmem43,Ap3d1,Sypl2,Tmed9,Mia3,Dtnbp1	11	412	0.51	0.0382
GO:0062012	Regulation of small molecule metabolic process	Cav1,Acadm,Sorbs1,Eno1,Park7,Ppp1r3c,Actn3,Pfkfb1,COX2,Kat2b,Tmsb4x	11	412	0.51	0.0382
GO:0090317	Negative regulation of intracellular protein transport	Ppp2ca,Txn1,Nol3,Park7	4	46	1.02	0.0382
GO:1901021	Positive regulation of calcium ion transmembrane transporter activity	Casq1,Cacna2d1,Calm1,ENSRNOP00000067246	4	46	1.02	0.0382
GO:1903427	Negative regulation of reactive oxygen species biosynthetic process	Cav1,Atp5g1,Park7,Dynll1	4	46	1.02	0.0382
GO:0006754	ATP biosynthetic process	Atp5g1,Atp5j2,Aldoa,Atp5g3	4	47	1.02	0.04
GO:0006979	Response to oxidative stress	Mapt,Arl6ip5,Car3,Txn1,Uaca,Ldha,Tpm1,Park7,COX1,ND3,ND1,Atf4	12	484	0.48	0.0403
GO:0032414	Positive regulation of ion transmembrane transporter activity	Casq1,Kcnj11,Cacna2d1,Calm1,Tmsb4x,ENSRNOP00000067246	6	128	0.76	0.0408
GO:1903828	Negative regulation of cellular protein localization	Mapt,Ppp2ca,Hectd1,Txn1,Nol3,Park7	6	128	0.76	0.0408
GO:0006165	Nucleoside diphosphate phosphorylation	Pgk1,Eno3,Eno1,Gpi,Aldoa,LOC108351137,Ak1	7	178	0.68	0.0409
GO:0006123	Mitochondrial electron transport, cytochrome c to oxygen	Cox5a,Cox6a2,COX1	3	20	1.26	0.0412
GO:0062013	Positive regulation of small molecule metabolic process	Sorbs1,Eno1,Park7,Actn3,COX2,Kat2b,Tmsb4x	7	179	0.68	0.0416
GO:0023051	Regulation of signaling	Cd24,Psap,Rabgef1,Tpt1,Zak,Hexim1,Timp2,Col3a1,Dnajb9,Sos2,Mapt,Strn3,Cav3,Ppp2ca,Cav1,Arl6ip5,Faf1,Fkbp1a,Akr1b1,Slc25a5,Zfp91,Uaca,Postn,Ctsh,Nol3,Sorbs1,Cul3,Tab2,Slc12a2,Eno1,Park7,Actn3,Nrep,Cd81,Kcnj11,Riok3,Ube2v1,Anxa2,Socs6,Dlg1,Atf4,Dynll1,Pfn2,Calm1,Ensa,Tmsb4x,Dtnbp1	47	3633	0.2	0.0426
GO:0032386	Regulation of intracellular transport	Mapt,Ppp2ca,Txn1,Uaca,Nol3,Park7,Lamp1,Cd81,Anxa2,ENSRNOP00000067246	10	357	0.53	0.0432
GO:0036293	Response to decreased oxygen levels	Cd24,Pgk1,Cav1,Postn,Ldha,Nol3,Eno1,Aldoa,Alkbh5,CYTB,Atf4	11	424	0.5	0.0439
GO:0000079	Regulation of cyclin-dependent protein serine/threonine kinase activity	Hexim1,Mnat1,Actb,Kat2b,Cdkn1c	5	88	0.84	0.0457
GO:0009605	Response to external stimulus	Cd24,Tpt1,Hexim1,Col3a1,Cd55,Actr2,Mapt,Mgp,Cav3,Cav1,Ifi27,Acadm,Car3,Postn,Ldha,Sparc,Ifitm3,Sorbs1,Tab2,Slc12a2,Eno1,Park7,Ap3d1,Gpi,Slc38a2,Aldoa,Riok3,Ttn,Pfkfb1,Actb,CYTB,Atp5g3,Ccdc80,Rab12,Atf4,Palld,Hmgn2,Rpl24	38	2753	0.23	0.0457
GO:0030910	Olfactory placode formation	Six1,Six4	2	4	1.78	0.0457
GO:0032768	Regulation of monooxygenase activity	Cav3,Cav1,Park7,Calm1	4	50	0.99	0.0457
GO:0043200	Response to amino acid	Col3a1,Col5a2,Atp5g1,Col1a2,Txn1,Six1,Col4a1	7	184	0.67	0.0457
GO:0051173	Positive regulation of nitrogen compound metabolic process	Cd24,Psap,Nek7,Sumo3,Pcolce,Zak,Timp2,Asb11,Lum,Actr2,Strn3,Ppp2ca,Cav1,Mnat1,Arl6ip5,Nrd1,Faf1,Fkbp1a,Pabpc1,Txn1,Zfp91,Uaca,Ctsh,Cul3,Tab2,Eno1,Park7,Ap3d1,Cd81,Slc38a2,Six1,Anxa2,Gpbp1,COX2,Six4,Vezf1,Dlg1,Kat2b,Atf4,Pfn2,Lmo4,Calm1,Tmsb4x,Dtnbp1,Rps4x,Tnni2	46	3548	0.2	0.0457
GO:0051924	Regulation of calcium ion transport	Cav3,Ppp2ca,Cav1,Casq1,Fkbp1a,Nol3,Cacna2d1,Calm1,ENSRNOP00000067246	9	299	0.56	0.0457
GO:0070836	Caveola assembly	Cav3,Cav1	2	4	1.78	0.0457
GO:0072095	Regulation of branch elongation involved in ureteric bud branching	Six1,Six4	2	4	1.78	0.0457
GO:0072107	Positive regulation of ureteric bud formation	Six1,Six4	2	4	1.78	0.0457
GO:1904064	Positive regulation of cation transmembrane transport	Casq1,Park7,Kcnj11,Cacna2d1,Calm1,Tmsb4x,ENSRNOP00000067246	7	184	0.67	0.0457
GO:2001259	Positive regulation of cation channel activity	Casq1,Kcnj11,Cacna2d1,Calm1,Tmsb4x	5	88	0.84	0.0457
GO:0005978	Glycogen biosynthetic process	Phkg1,Acadm,Ppp1r3c	3	22	1.22	0.0477
GO:0008631	Intrinsic apoptotic signaling pathway in response to oxidative stress	Mapt,Arl6ip5,Uaca	3	22	1.22	0.0477
GO:0022607	Cellular component assembly	Psap,Mfap4,Actr2,Ubxn2a,Mapt,Mgp,Cav3,Cav1,Casq1,Atp5g1,Fkbp1a,Ndufb9,Eif4b,Col1a2,Nol3,Sorbs1,Cul3,Tpm1,Nrap,Aldoa,Pkn2,Ttn,Anxa2,Actb,LOC685596,Tnnt3,Six4,Csde1,Atp5g3,Dlg1,Ptpla,Dynll1,Sh3bgr,Rpl24	34	2384	0.24	0.0477
GO:0051171	Regulation of nitrogen compound metabolic process	Cd24,Psap,Nek7,Rabgef1,Suds3,Sumo3,Pcolce,Zak,Hexim1,Timp2,Serpinf1,Asb11,Lum,Actr2,Ubxn2a,Mapt,Strn3,Phf20l1,Cav3,Ppp2ca,Cav1,Mnat1,Arl6ip5,Nrd1,Faf1,Fkbp1a,Pabpc1,Eif4b,Txn1,Zfp91,Uaca,Ctsh,Nol3,Cul3,Tab2,Serpinh1,Eno1,Park7,Ap3d1,Hhatl,Eif4e2,Col6a3,Actn3,Cd81,Gpi,Slc38a2,Alkbh5,Ttn,Ube2v1,Rfx7,Six1,Anxa2,Gpbp1,Actb,COX2,Six4,Vezf1,Dlg1,Kat2b,Atf4,Dynll1,Pfn2,Lmo4,Calm1,Ensa,Hmgn2,LOC108351137…	72	6337	0.14	0.0477
GO:0060547	Negative regulation of necrotic cell death	Cav1,Nol3,Fth1	3	22	1.22	0.0477
rno05012	Parkinson disease	Ndufa4,Atp5g1,Ndufb9,Ube2g1,Slc25a5,Txn1,Park7,Cox5a,Cox6a2,COX1,ND3,ND2,COX2,CYTB,ND1,Atp5g3,Atf4	17	229	0.96	6.84e-09
rno00190	Oxidative phosphorylation	Ndufa4,Atp5g1,Ndufb9,Cox5a,Cox6a2,Atp5j2,COX1,ND3,ND2,COX2,CYTB,ND1,Atp5g3	13	130	1.09	2.9e-08
rno04714	Thermogenesis	Sos2,Ndufa4,Atp5g1,Ndufb9,Cox5a,Cox6a2,Atp5j2,COX1,ND3,ND2,Actb,COX2,CYTB,ND1,Atp5g3	15	224	0.91	1.08e-07
rno05020	Prion disease	Ndufa4,Cav3,Cav1,Atp5g1,Ndufb9,Slc25a5,Cox5a,Cox6a2,COX1,ND3,ND2,COX2,CYTB,ND1,Atp5g3,Atf4	16	258	0.88	1.08e-07
rno05014	Amyotrophic lateral sclerosis	Ndufa4,Atp5g1,Ndufb9,Cox5a,Cox6a2,COX1,ND3,ND2,Actb,COX2,CYTB,ND1,Atp5g3,Atf4,Pfn2	15	340	0.73	1.59e-05
rno05016	Huntington disease	Ndufa4,Atp5g1,Ndufb9,Slc25a5,Cox5a,Cox6a2,COX1,ND3,ND2,COX2,CYTB,ND1,Atp5g3	13	283	0.75	5.63e-05
rno05010	Alzheimer disease	Ndufa4,Atp5g1,Ndufb9,Slc25a5,Cox5a,Cox6a2,COX1,ND3,ND2,COX2,CYTB,ND1,Atp5g3,Atf4	14	349	0.69	8.55e-05
rno04974	Protein digestion and absorption	Col6a2,Col3a1,Col5a2,Col1a2,Col15a1,Col6a3,Slc38a2,Col4a1	8	99	0.99	0.00011
rno04260	Cardiac muscle contraction	Tpm1,Cox5a,Cox6a2,Cacna2d1,COX1,COX2,CYTB	7	83	1.01	0.00033
rno00010	Glycolysis / Gluconeogenesis	Pgk1,Eno3,Ldha,Eno1,Gpi,Aldoa	6	58	1.1	0.00045
rno04932	Non-alcoholic fatty liver disease	Ndufa4,Ndufb9,Cox5a,Cox6a2,COX1,COX2,CYTB,Atf4	8	146	0.82	0.0012
rno01100	Metabolic pathways	Pgk1,Eno3,Ndufa4,Atp5g1,C1galt1,Ndufb9,Akr1b1,Acadm,Car3,Hadhb,Ldha,Eno1,Ampd1,Cox5a,Cox6a2,Atp5j2,Gpi,Aldoa,Pfkfb1,COX1,ND3,ND2,COX2,CYTB,ND1,Atp5g3,Ptpla	27	1450	0.36	0.0019
rno04510	Focal adhesion	Col6a2,Sos2,Cav3,Cav1,Col1a2,Col6a3,Actb,Col4a1	8	186	0.72	0.0051
rno04066	HIF-1 signaling pathway	Pgk1,Eno3,Ldha,Eno1,Eif4e2,Aldoa	6	106	0.84	0.0075
rno05132	Salmonella infection	Txn1,Arpc5l,Tab2,Kpna3,Anxa2,Actb,Dynll1,Pfn2	8	203	0.68	0.0077
rno04151	PI3K-Akt signaling pathway	Col6a2,Sos2,Ppp2ca,Eif4b,Col1a2,Eif4e2,Col6a3,Pkn2,Col4a1,Atf4	10	325	0.57	0.0092
rno05205	Proteoglycans in cancer	Lum,Sos2,Cav3,Cav1,Eif4b,Col1a2,Actb	7	187	0.66	0.0213
rno01200	Carbon metabolism	Pgk1,Eno3,Eno1,Gpi,Aldoa	5	109	0.75	0.045

## Sheet: GSE13270_4 weeks
#term ID	term description	matching proteins in your network (labels)	observed gene count	background gene count	strength	false discovery rate
GO:0033993	Response to lipid	Alas2,Aif1,Ran,Rplp0,Ugt2b1,Cd38,Ephx1,Prdx2,Ahr,Tfpi,Mgp,Lyn,Serpina1,Il18,Serpina3n,Fdx1,Col1a2,C1qb,Sparc,Cyba,Rbp1,B2m,Anxa1,Vim,Ccnb1,Il18bp,Pcna,Agtr1a,Lrat,Maob,LOC259244,Pam,Plscr1,Cd68,Acat2,Anxa3,Lox,Mest,Acp5,C3,Slpi	41	1199	0.63	1.63e-11
GO:0009725	Response to hormone	Gatm,Aif1,Ran,Por,Ugt2b1,Cd38,Ephx1,Ahr,Tfpi,Mgp,Lyn,Bsg,Il18,Serpina3n,Fdx1,Col1a2,C1qb,Ldha,Sparc,Cyba,Spink3,Sord,Anxa1,Bbs2,Pcna,Agtr1a,Maob,Sts,LOC259244,Pam,Fbn1,Ahsg,Anxa3,Lox,C3	35	1105	0.6	5.36e-09
GO:0050896	Response to stimulus	Alas2,Gatm,Psmb9,Cdk1,Fabp7,Aif1,Ran,Rplp0,Col6a1,Por,Ugt2b1,Afp,Alb,Cd38,Ephx1,Prdx2,Col3a1,Pttg1,Col5a2,Lum,A1bg,Rtn4,Ahr,Tfpi,Crip1,Abcg5,Rbm3,Mgp,Lyz2,Arhgdib,Aurkb,Lgmn,Vamp7,Lyn,Bsg,Cyp2d4,Gsta4,Serpina1,Dpysl2,Il18,Serpina3n,Dap,Il17ra,Laptm5,Inmt,Adh7,Fdx1,Col1a2,C1qb,Dbnl,C1qa,Ldha,Sparc,Cyba,Ect2,Spink3,Rbp1,Nox4,Gja4,Ifitm2,Hyal3,Cdh17,B2m,Sord,Irf7,Anxa1,Plvap,Vim,Slc22a8,Ccnb1,Cd74,B…	120	9725	0.19	1.67e-07
GO:0031960	Response to corticosteroid	Aif1,Ran,Ugt2b1,Ephx1,Ahr,Mgp,Serpina3n,C1qb,Sparc,Cyba,Anxa1,Pcna,Agtr1a,Maob,Pam,Anxa3,C3	17	308	0.84	4.95e-07
GO:0051384	Response to glucocorticoid	Aif1,Ugt2b1,Ephx1,Ahr,Mgp,Serpina3n,C1qb,Sparc,Anxa1,Pcna,Agtr1a,Maob,Pam,Anxa3,C3	15	279	0.83	5.2e-06
GO:0010817	Regulation of hormone levels	Por,Scpep1,Afp,Cd38,Vamp7,Lyn,Cyp2d4,Cel,Furin,Adh7,Fdx1,Spink3,Rbp1,Anxa1,Aldh1a7,Agtr1a,Lrat,LOC259244,Glul,Sri	20	584	0.63	2.27e-05
GO:0006629	Lipid metabolic process	Ipmk,Por,Scpep1,Afp,Ephx1,Sptssa,Eci1,Cyp2d4,Plbd1,Cel,Adh7,Fdx1,Rbp1,Acsm2a,Aldh1a7,Agpat6,Cd74,Fdft1,Lrat,Pla1a,Lss,Sts,Pam,ENSRNOP00000047118,Pmp22,Plscr1,Ddhd2,Acat2,C3	29	1176	0.49	2.47e-05
GO:0032496	Response to lipopolysaccharide	Ugt2b1,Prdx2,Tfpi,Lyn,Serpina1,Il18,Serpina3n,Sparc,B2m,Vim,Il18bp,Maob,Plscr1,Cd68,Acp5,Slpi	16	431	0.67	0.00013
GO:0006954	Inflammatory response	Aif1,Prdx2,Rtn4,Lyn,Serpina1,Il18,Serpina3n,C1qa,Cyba,Hyal3,Anxa1,Pld4,Agtr1a,Fcer1g,Plscr1,Cd68,Ahsg,C3	18	568	0.6	0.0002
GO:0002443	Leukocyte mediated immunity	A1bg,Vamp7,Lyn,Il18,C1qb,C1qa,Irf7,Cd74,Coro1a,Fcer1g,Mettl7a,Anxa3,C3	13	307	0.72	0.00033
GO:0043434	Response to peptide hormone	Gatm,Por,Ugt2b1,Lyn,Bsg,Il18,Serpina3n,Sparc,Cyba,Spink3,Anxa1,Agtr1a,Sts,LOC259244,Fbn1,Ahsg	16	519	0.59	0.00094
GO:0002682	Regulation of immune system process	Aif1,Cd38,Prdx2,Col3a1,Rtn4,Ahr,Lgmn,Vamp7,Lyn,Il18,C1qb,C1qa,Rbp1,B2m,Irf7,Anxa1,Plvap,Cd74,Ap3d1,Coro1a,Dak,Fcer1g,Lcp2,Cdc37,Fbn1,Plscr1,Cd68,Lox,Sh2b3,C3	30	1557	0.38	0.0012
GO:0002366	Leukocyte activation involved in immune response	A1bg,Vamp7,Lyn,Cdh17,Cd74,Coro1a,Fcer1g,Mettl7a,Anxa3	9	194	0.76	0.0044
GO:0043393	Regulation of protein binding	Ran,Aurkb,B2m,Amfr,Ptprf,Hopx,Plscr1,Lox,Ctsz,Slpi	10	258	0.69	0.0065
GO:0006631	Fatty acid metabolic process	Por,Ephx1,Eci1,Cyp2d4,Adh7,Acsm2a,Agpat6,Cd74,Pam,Acat2,C3	11	350	0.59	0.015
GO:2000106	Regulation of leukocyte apoptotic process	Aurkb,Lyn,Il18,Anxa1,Cd74,Fcer1g	6	110	0.83	0.025
GO:0070555	Response to interleukin-1	Psmb9,Cd38,Tfpi,Serpina3n,Cyba,Hyal3,Anxa1	7	162	0.73	0.0292
GO:0002532	Production of molecular mediator involved in inflammatory response	Prdx2,Lyn,Fcer1g	3	21	1.25	0.0484
GO:0050727	Regulation of inflammatory response	Vamp7,Lyn,Il17ra,Anxa1,Pld4,Fcer1g,Pmp22,Ahsg,Acp5,C3	10	368	0.53	0.0497
rno00980	Metabolism of xenobiotics by cytochrome P450	Ugt2b1,Ephx1,Gsta4,Adh7,Akr7a2	5	64	0.99	0.0172
rno00982	Drug metabolism - cytochrome P450	Ugt2b1,Fmo3,Gsta4,Adh7,Maob	5	63	1	0.0172
rno04933	AGE-RAGE signaling pathway in diabetic complications	Col3a1,Col1a2,Nox4,Agtr1a,Col4a1	5	93	0.83	0.0369
rno04974	Protein digestion and absorption	Col6a1,Col3a1,Col5a2,Col1a2,Col4a1	5	99	0.8	0.0438
rno05204	Chemical carcinogenesis	Cyp3a62,Ugt2b1,Ephx1,Gsta4,Adh7	5	82	0.88	0.0291
rno04976	Bile secretion	Ugt2b1,Ephx1,Abcg5,Slc22a8,Kcnn2	5	87	0.86	0.0309
rno04610	Complement and coagulation cascades	Tfpi,Serpina1,C1qb,C1qa,C3	5	78	0.9	0.029
rno04142	Lysosome	Lgmn,Laptm5,Manba,Hyal3,Ap3d1,Napsa,Cd68,Acp5,Ctsz	9	124	0.96	0.0004
rno01100	Metabolic pathways	Gatm,Ipmk,Cyp3a62,Ugt2b1,Cd38,Gsta4,Cel,Aldh1b1,Inmt,Adh7,Oplah,Ldha,Psat1,Acsm2a,Hyal3,Sord,Agpat6,Cyp8b1,Dak,Fdft1,Pld4,Maob,Acat2,Gys2,Ddc,Dpyd,Glul,Acp5	28	1450	0.38	0.0026
rno00561	Glycerolipid metabolism	Cel,Aldh1b1,Agpat6,Dak	4	61	0.91	0.0492
rno00380	Tryptophan metabolism	Aldh1b1,Inmt,Maob,Acat2,Ddc	5	47	1.12	0.0063
rno00071	Fatty acid degradation	Eci1,Aldh1b1,Adh7,Acat2	4	45	1.05	0.0291
GO:2000145	Regulation of cell motility	Aif1,Col3a1,Rtn4,Arhgdib,Lgmn,Lyn,Il18,Furin,Sparc,Nox4,Anxa1,Plvap,Vim,Cd74,Bbs2,Coro1a,ENSRNOP00000047118,Anxa3,Glul,Acp5	20	1045	0.38	0.0245
GO:2000026	Regulation of multicellular organismal development	Marcks,Cdk1,Por,Cd38,Prdx2,Col3a1,Col5a2,Rtn4,Mgp,Arhgdib,Vamp7,Lyn,Dpysl2,Il18,Dbnl,Sparc,Ect2,Rbp1,Hyal3,B2m,Anxa1,Vim,Ccnb1,Cd74,Ap3d1,Ptprf,Nrep,Agtr1a,Prtg,Lphn1,Hopx,ENSRNOP00000047118,Pmp22,Fbn1,Ahsg,Nfib,Anxa3,Lox,Glul,Ctsz,Sh2b3,C3	42	2319	0.36	9.13e-05
GO:1905448	Positive regulation of mitochondrial atp synthesis coupled electron transport	Cdk1,Iscu,Ccnb1	3	5	1.88	0.0035
GO:1903034	Regulation of response to wounding	Prdx2,Rtn4,Tfpi,Lyn,Anxa1,Ptprf,Fcer1g,Sh2b3	8	192	0.72	0.0182
GO:1901701	Cellular response to oxygen-containing compound	Cdk1,Aif1,Rplp0,Col6a1,Por,Ugt2b1,Prdx2,Col3a1,Col5a2,Ahr,Tfpi,Lgmn,Lyn,Il18,Serpina3n,Fdx1,Col1a2,Cyba,Ect2,Spink3,Nox4,B2m,Anxa1,Vim,Ccnb1,Il18bp,Pcna,Agtr1a,LOC259244,Fbn1,Plscr1,Cd68,Col4a1,Ahsg,Hnrnph1,Acat2	36	1291	0.54	6.17e-08
GO:1901700	Response to oxygen-containing compound	Alas2,Gatm,Cdk1,Aif1,Rplp0,Col6a1,Por,Ugt2b1,Cd38,Prdx2,Col3a1,Col5a2,Ahr,Tfpi,Lgmn,Lyn,Bsg,Serpina1,Dpysl2,Il18,Serpina3n,Adh7,Fdx1,Col1a2,Ldha,Sparc,Cyba,Ect2,Spink3,Nox4,B2m,Anxa1,Vim,Slc22a8,Ccnb1,Il18bp,Pcna,Agtr1a,Lrat,Maob,Sts,LOC259244,Pam,Fbn1,Plscr1,Cd68,Col4a1,Ahsg,Hnrnph1,Acat2,Gys2,Mest,Glul,Acp5,C3,Slpi	56	2048	0.53	9.4e-13
GO:1901654	Response to ketone	Rplp0,Ugt2b1,Cd38,Ahr,Fdx1,Cyba,Pcna,Agtr1a,Maob,C3	10	347	0.56	0.0367
GO:1901653	Cellular response to peptide	Por,Ugt2b1,Lgmn,Il18,Cyba,Spink3,Vim,Agtr1a,LOC259244,Fbn1,Ahsg,Hnrnph1	12	389	0.59	0.0095
GO:1901652	Response to peptide	Gatm,Por,Ugt2b1,Lgmn,Lyn,Bsg,Il18,Serpina3n,Sparc,Cyba,Spink3,Anxa1,Vim,Agtr1a,Sts,LOC259244,Fbn1,Ahsg,Hnrnph1	19	622	0.58	0.00018
GO:1901617	Organic hydroxy compound biosynthetic process	Ipmk,Ephx1,Cyp2d4,Fdft1,Agtr1a,Lss,Acat2,Ddc	8	194	0.71	0.0187
GO:1901615	Organic hydroxy compound metabolic process	Ipmk,Ephx1,Cyp2d4,Cel,Aldh1b1,Adh7,Fdx1,Ldha,Rbp1,Sord,Akr7a2,Aldh1a7,Dak,Fdft1,Agtr1a,Lrat,Lss,Pmp22,Acat2,Ddc	20	477	0.72	1.26e-06
GO:0098542	Defense response to other organism	Aif1,Lyz2,Vamp7,Lyn,Il18,Serpina3n,Il17ra,C1qb,C1qa,Cyba,Ifitm2,B2m,Irf7,Anxa1,Vim,Coro1a,Pld4,Fcer1g,Ifitm1,Mx1,Plscr1,Anxa3,Acp5,C3,Slpi	25	1011	0.49	0.00015
GO:0097305	Response to alcohol	Cdk1,Rplp0,Ugt2b1,Ahr,Serpina1,Adh7,Fdx1,Sparc,Cyba,Spink3,Agtr1a,Maob,Acp5	13	408	0.6	0.0042
GO:0090087	Regulation of peptide transport	Cdk1,Ran,Cd38,Vamp7,Lyn,Ect2,Spink3,Anxa1,Cd74,Bcap31,Agtr1a,Mdfic,LOC259244,Pam,Glul,Sri	16	731	0.44	0.0244
GO:0080134	Regulation of response to stress	Prdx2,Rtn4,Tfpi,Vamp7,Lyn,Il17ra,Cyba,B2m,Irf7,Anxa1,Cd74,Bcap31,Ptprf,Dak,Pcna,Pld4,Fcer1g,Mdfic,Pmp22,Cdc37,Plscr1,Ahsg,Acp5,Sh2b3,C3	25	1415	0.34	0.0172
GO:0072359	Circulatory system development	Marcks,Cdk1,Col3a1,Rtn4,Ahr,Il18,Col1a2,Sparc,Nox4,Gja4,Ccnb1,Pcna,Emcn,Agtr1a,Hopx,Pam,Fbn1,Col4a1,Lox,Glul,Sri,C3	22	993	0.44	0.0026
GO:0071704	Organic substance metabolic process	Alas2,Gatm,Psmb9,Ipmk,Cdk1,Aif1,Ran,Rplp0,Por,Ugt2b1,Scpep1,Afp,Ephx1,Col3a1,Pttg1,Sptssa,Ahr,Rbm3,Aurkb,Eif1ax,Lgmn,Lyn,Eci1,Cyp2d4,Plbd1,Gsta4,Il18,Cel,Aldh1b1,Inmt,Uhrf2,Furin,Adh7,Fam111a,Fdx1,Oplah,Dpp7,Ldha,Manba,Tinagl1,Rbp1,Psat1,Nox4,Acsm2a,Cdca3,Hyal3,Ube2s,B2m,Sord,Irf7,Anxa1,Plvap,Akr7a2,Aldh1a7,Agpat6,Ccnb1,Cd74,Ap3d1,Amfr,Napsa,Ptprf,Dak,Pcna,Fdft1,Pld4,Agtr1a,Lrat,Pla1a,Fcer1g,Lss,…	97	8697	0.14	0.0036
GO:0071495	Cellular response to endogenous stimulus	Aif1,Ran,Rplp0,Col6a1,Por,Ugt2b1,Ephx1,Col3a1,Col5a2,Ahr,Tfpi,Lgmn,Il18,Serpina3n,Fdx1,Col1a2,Cyba,Spink3,Nox4,Anxa1,Vim,Bbs2,Coro1a,Dync1li2,Agtr1a,LOC259244,Fbn1,Col4a1,Ahsg,Hnrnph1,Ddc	31	1338	0.46	3.06e-05
GO:0071417	Cellular response to organonitrogen compound	Aif1,Rplp0,Col6a1,Por,Ugt2b1,Col3a1,Col5a2,Ahr,Lgmn,Il18,Serpina3n,Fdx1,Col1a2,Cyba,Spink3,Nox4,Vim,Agtr1a,LOC259244,Fbn1,Col4a1,Ahsg,Hnrnph1,Ddc	24	730	0.61	2.9e-06
GO:0071407	Cellular response to organic cyclic compound	Aif1,Ran,Rplp0,Ugt2b1,Ephx1,Ahr,Tfpi,Il18,Serpina3n,Fdx1,Cyba,Nox4,Anxa1,Ccnb1,Agtr1a	15	685	0.44	0.0328
GO:0071396	Cellular response to lipid	Ran,Rplp0,Ugt2b1,Ephx1,Ahr,Tfpi,Lyn,Il18,Serpina3n,Fdx1,Col1a2,B2m,Anxa1,Vim,Ccnb1,Agtr1a,LOC259244,Plscr1,Cd68,Acat2	20	658	0.58	0.00011
GO:0071385	Cellular response to glucocorticoid stimulus	Ugt2b1,Ephx1,Ahr,Serpina3n,Anxa1,Agtr1a	6	107	0.85	0.0225
GO:0071384	Cellular response to corticosteroid stimulus	Ran,Ugt2b1,Ephx1,Ahr,Serpina3n,Anxa1,Agtr1a	7	114	0.89	0.0058
GO:0071383	Cellular response to steroid hormone stimulus	Ran,Ugt2b1,Ephx1,Ahr,Tfpi,Serpina3n,Anxa1,Agtr1a	8	224	0.65	0.0354
GO:0071375	Cellular response to peptide hormone stimulus	Por,Ugt2b1,Il18,Cyba,Spink3,Agtr1a,LOC259244,Fbn1,Ahsg	9	304	0.57	0.0498
GO:0071345	Cellular response to cytokine stimulus	Psmb9,Aif1,Rplp0,Tfpi,Il18,Serpina3n,Il17ra,Laptm5,Cyba,Ifitm2,Hyal3,Irf7,Plvap,Vim,Cd74,Bbs2,Coro1a,Il18bp,Lrat,Fcer1g,Ifitm1,Plscr1,Hnrnph1,Lox,Sh2b3	25	850	0.57	1.06e-05
GO:0071320	Cellular response to camp	Rplp0,Ahr,Il18,Serpina3n,Fdx1,Nox4	6	79	0.98	0.0065
GO:0071310	Cellular response to organic substance	Psmb9,Aif1,Ran,Rplp0,Col6a1,Por,Ugt2b1,Ephx1,Col3a1,Col5a2,Ahr,Tfpi,Lgmn,Lyn,Il18,Serpina3n,Il17ra,Laptm5,Fdx1,Col1a2,Sparc,Cyba,Spink3,Nox4,Ifitm2,Hyal3,B2m,Irf7,Anxa1,Plvap,Vim,Ccnb1,Cd74,Bbs2,Amfr,Coro1a,Il18bp,Dync1li2,Agtr1a,Lrat,Fcer1g,Ifitm1,LOC259244,Pmp22,Fbn1,Plscr1,Cd68,Col4a1,Ahsg,Hnrnph1,Acat2,Ddc,Lox,Sh2b3	54	2385	0.45	1.74e-09
GO:0071283	Cellular response to iron(iii) ion	B2m,Ccnb1	2	4	1.8	0.0498
GO:0071230	Cellular response to amino acid stimulus	Col6a1,Col3a1,Col5a2,Col1a2,Cyba,Col4a1	6	94	0.9	0.0146
GO:0070887	Cellular response to chemical stimulus	Psmb9,Cdk1,Aif1,Ran,Rplp0,Col6a1,Por,Ugt2b1,Ephx1,Prdx2,Col3a1,Col5a2,Rtn4,Ahr,Tfpi,Crip1,Lgmn,Lyn,Cyp2d4,Gsta4,Il18,Serpina3n,Il17ra,Laptm5,Fdx1,Col1a2,Sparc,Cyba,Ect2,Spink3,Nox4,Ifitm2,Hyal3,B2m,Irf7,Anxa1,Plvap,Vim,Ccnb1,Cd74,Bbs2,Amfr,Coro1a,Il18bp,Pcna,Dync1li2,Agtr1a,Lrat,Fcer1g,Ifitm1,LOC259244,Pmp22,Fbn1,Plscr1,Cd68,Col4a1,Ahsg,Hnrnph1,Acat2,Ddc,Lox,Sh2b3	62	3000	0.41	1.12e-09
GO:0070665	Positive regulation of leukocyte proliferation	Aif1,Cd38,Lyn,Il18,Anxa1,Cd74,Coro1a	7	162	0.73	0.0292
GO:0070301	Cellular response to hydrogen peroxide	Cdk1,Il18,Ect2,Anxa1,Il18bp,Pcna	6	102	0.87	0.019
GO:0065008	Regulation of biological quality	Alas2,Gatm,Marcks,Iscu,Tubb5,Rplp0,Por,Scpep1,Afp,Alb,Cd38,Rogdi,Prdx2,Rtn4,Ahr,Tfpi,Abcg5,Aurkb,Lgmn,Vamp7,Lyn,Cyp2d4,Dpysl2,Il18,Cel,Furin,Adh7,Fdx1,Col1a2,Mkln1,Dbnl,Sparc,Cyba,Spink3,Rbp1,Nox4,Ube2s,B2m,Anxa1,Aldh1a7,Agpat6,Vim,Cd74,Bcap31,Ap3d1,Bbs2,Ifi30,Coro1a,Gmfg,Napsa,Ptprf,Pcna,Agtr1a,Lrat,Fcer1g,Lss,Lphn1,Mx1,Maob,LOC259244,Pam,Pmp22,Cdc37,Fbn1,Plscr1,Ahsg,Kcnn2,Lox,Mest,Glul,Acp5,Sri…	74	4532	0.31	1.09e-07
GO:0065007	Biological regulation	Alas2,Gatm,Psmb9,Marcks,Cdk1,Iscu,Fabp7,Tubb5,Aif1,Ran,Rplp0,Por,Scpep1,Afp,Alb,Cd38,Rogdi,Prdx2,Col3a1,Pttg1,Col5a2,Lum,Rtn4,Ahr,Tfpi,Crip1,Abcg5,Rbm3,Mgp,Arhgdib,Aurkb,Eif1ax,Lgmn,Vamp7,Lyn,Bsg,Cyp2d4,Serpina1,Dpysl2,Il18,Serpina3n,Dap,Cel,Il17ra,Uhrf2,Furin,Adh7,Fam111a,Fdx1,Col1a2,Mkln1,C1qb,Dbnl,C1qa,Ldha,Sparc,Cyba,Ect2,Spink3,Vdac2,Rbp1,Nox4,Ifitm2,Hyal3,Cdh17,Ninj1,Ube2s,B2m,Irf7,Anxa1,Pl…	135	14272	0.07	0.0406
GO:0060337	Type i interferon signaling pathway	Ifitm2,Irf7,Ifitm1	3	18	1.32	0.0367
GO:0055114	Oxidation-reduction process	Cyp3a62,Por,Prdx2,Fmo3,Eci1,Cyp2d4,Aldh1b1,Adh7,Fdx1,Ldha,Cyba,Nox4,Sh3bgrl3,Sord,Akr7a2,Aldh1a7,Ifi30,Cyp8b1,Maob,LOC259244,Pam,Acat2,Gys2,Lox,Dpyd	25	1177	0.42	0.0015
GO:0052548	Regulation of endopeptidase activity	Psmb9,Por,Pttg1,Tfpi,Lgmn,Lyn,Serpina1,Serpina3n,Dap,Furin,Spink3,Bcap31,Ahsg,C3,Slpi	15	492	0.58	0.0019
GO:0051988	Regulation of attachment of spindle microtubules to kinetochore	Aurkb,Ect2,Ccnb1	3	15	1.4	0.0267
GO:0051716	Cellular response to stimulus	Psmb9,Cdk1,Aif1,Ran,Rplp0,Col6a1,Por,Ugt2b1,Afp,Alb,Cd38,Ephx1,Prdx2,Col3a1,Pttg1,Col5a2,Rtn4,Ahr,Tfpi,Crip1,Abcg5,Arhgdib,Aurkb,Lgmn,Lyn,Cyp2d4,Gsta4,Il18,Serpina3n,Dap,Il17ra,Laptm5,Fdx1,Col1a2,Dbnl,Ldha,Sparc,Cyba,Ect2,Spink3,Nox4,Ifitm2,Hyal3,Cdh17,B2m,Irf7,Anxa1,Plvap,Vim,Ccnb1,Cd74,Bcap31,Ap3d1,Bbs2,Amfr,Coro1a,Gmfg,Ptprf,Il18bp,Nrep,Pcna,Dync1li2,Agtr1a,Lrat,Fcer1g,Lphn1,Ifitm1,Mdfic,LOC25…	85	7732	0.14	0.0218
GO:0051707	Response to other organism	Psmb9,Aif1,Ugt2b1,Prdx2,Tfpi,Lyz2,Vamp7,Lyn,Serpina1,Il18,Serpina3n,Il17ra,Adh7,C1qb,C1qa,Sparc,Cyba,Ifitm2,Hyal3,B2m,Irf7,Anxa1,Vim,Coro1a,Il18bp,Pld4,Lrat,Fcer1g,Ifitm1,Mx1,Maob,Pmp22,Plscr1,Cd68,Anxa3,Acp5,C3,Slpi	38	1493	0.5	1.62e-07
GO:0051591	Response to camp	Rplp0,Ahr,Bsg,Il18,Serpina3n,Fdx1,Ldha,Sparc,Nox4	9	152	0.87	0.00091
GO:0051347	Positive regulation of transferase activity	Marcks,Prdx2,Aurkb,Lyn,Il18,Ect2,Nox4,Ube2s,Ccnb1,Cd74,Pcna,Agtr1a,Mdfic,Stradb,Lcp2,Fbn1	16	718	0.45	0.0212
GO:0051338	Regulation of transferase activity	Marcks,Prdx2,Aurkb,Lyn,Il18,Ect2,Nox4,Ube2s,Ccnb1,Cd74,Gmfg,Pcna,Agtr1a,Mdfic,Stradb,Lcp2,Pmp22,Cdc37,Fbn1,Ahsg,Sh2b3	21	1081	0.39	0.0172
GO:0051336	Regulation of hydrolase activity	Psmb9,Marcks,Por,Pttg1,Ahr,Tfpi,Arhgdib,Lgmn,Lyn,Serpina1,Serpina3n,Dap,Furin,Ect2,Spink3,Anxa1,Bcap31,Pcna,Agtr1a,Plscr1,Ahsg,C3,Slpi	23	1373	0.32	0.0405
GO:0051270	Regulation of cellular component movement	Aif1,Col3a1,Rtn4,Arhgdib,Lgmn,Lyn,Il18,Furin,Sparc,Nox4,Anxa1,Plvap,Vim,Cd74,Bbs2,Coro1a,ENSRNOP00000047118,Anxa3,Glul,Acp5,Sri	21	1138	0.36	0.0267
GO:0051241	Negative regulation of multicellular organismal process	Cd38,Prdx2,Col3a1,Col5a2,Rtn4,Ahr,Tfpi,Abcg5,Arhgdib,Lgmn,Lyn,Furin,Sparc,Cyba,Hyal3,B2m,Anxa1,Vim,Cd74,Bbs2,Prtg,Pmp22,Fbn1,Ahsg,Nfib,Acp5,Sri,Ctsz,Sh2b3	29	1386	0.42	0.00042
GO:0051240	Positive regulation of multicellular organismal process	Gatm,Marcks,Cdk1,Aif1,Por,Alb,Cd38,Prdx2,Lum,Rtn4,Lgmn,Vamp7,Lyn,Bsg,Il18,Il17ra,Furin,Dbnl,Sparc,Cyba,Ect2,Spink3,B2m,Irf7,Anxa1,Vim,Ccnb1,Cd74,Ap3d1,Bbs2,Ptprf,Agtr1a,Fcer1g,Lphn1,ENSRNOP00000047118,Ahsg,Acat2,Anxa3,C3	39	2053	0.38	8.4e-05
GO:0051239	Regulation of multicellular organismal process	Gatm,Marcks,Cdk1,Aif1,Por,Alb,Cd38,Prdx2,Col3a1,Col5a2,Lum,Rtn4,Ahr,Tfpi,Abcg5,Mgp,Arhgdib,Lgmn,Vamp7,Lyn,Bsg,Dpysl2,Il18,Il17ra,Furin,Dbnl,Sparc,Cyba,Ect2,Spink3,Rbp1,Hyal3,B2m,Irf7,Anxa1,Agpat6,Vim,Ccnb1,Cd74,Ap3d1,Bbs2,Ptprf,Nrep,Dak,Pld4,Agtr1a,Prtg,Fcer1g,Lphn1,Hopx,ENSRNOP00000047118,Pmp22,Fbn1,Ahsg,Acat2,Kcnn2,Nfib,Anxa3,Lox,Glul,Acp5,Sri,Ctsz,Sh2b3,C3	65	3488	0.37	1.5e-08
GO:0051128	Regulation of cellular component organization	Marcks,Tubb5,Cd38,Pttg1,Rtn4,Ahr,Arhgdib,Aurkb,Vamp7,Lyn,Dpysl2,Mkln1,Dbnl,Sparc,Cyba,Ect2,Vdac2,Nox4,Cdh17,B2m,Anxa1,Cd53,Vim,Ccnb1,Coro1a,Gmfg,Ptprf,Mki67,Lphn1,Pam,ENSRNOP00000047118,Pmp22,Cdc37,Ahsg,Ddhd2,Ctsz,C3	37	2704	0.23	0.0447
GO:0051100	Negative regulation of binding	Aurkb,Cyp2d4,B2m,Ptprf,Plscr1,Sri,Ctsz,Slpi	8	192	0.72	0.0182
GO:0051098	Regulation of binding	Ran,Aurkb,Cyp2d4,B2m,Amfr,Ptprf,Hopx,Plscr1,Lox,Sri,Ctsz,Slpi	12	449	0.52	0.025
GO:0051093	Negative regulation of developmental process	Cd38,Prdx2,Col3a1,Col5a2,Rtn4,Ahr,Arhgdib,Lgmn,Lyn,Il18,Sparc,Hyal3,B2m,Anxa1,Vim,Cd74,Bbs2,Prtg,Hopx,Pmp22,Fbn1,Ahsg,Nfib,Ctsz,Sh2b3	25	1133	0.44	0.00085
GO:0051050	Positive regulation of transport	Cdk1,Ran,Cd38,Rtn4,Vamp7,Dpysl2,Cyba,Ect2,Spink3,Hyal3,B2m,Anxa1,Bcap31,Agtr1a,Lrat,Fcer1g,Ahsg,Acat2,Glul,Sri,C3	21	1122	0.37	0.0234
GO:0051049	Regulation of transport	Cdk1,Iscu,Ran,Cd38,Rtn4,Ahr,Abcg5,Vamp7,Lyn,Dpysl2,Mkln1,Cyba,Ect2,Spink3,Hyal3,B2m,Anxa1,Cd74,Bcap31,Coro1a,Agtr1a,Lrat,Fcer1g,Maob,Mdfic,LOC259244,Pam,Ahsg,Acat2,Kcnn2,Glul,Sri,C3	33	2063	0.3	0.0107
GO:0051046	Regulation of secretion	Cd38,Rtn4,Vamp7,Lyn,Dpysl2,Cyba,Spink3,Hyal3,Anxa1,Cd74,Agtr1a,Fcer1g,Maob,LOC259244,Pam,Glul,Sri	17	866	0.39	0.0399
GO:0050878	Regulation of body fluid levels	Alas2,Rplp0,Prdx2,Tfpi,Lyn,Cel,Cyba,Spink3,Agpat6,Fcer1g,Pam,Sh2b3,C3	13	409	0.6	0.0043
GO:0050793	Regulation of developmental process	Marcks,Cdk1,Por,Cd38,Prdx2,Col3a1,Col5a2,Rtn4,Ahr,Mgp,Arhgdib,Lgmn,Vamp7,Lyn,Dpysl2,Il18,Mkln1,Dbnl,Sparc,Ect2,Rbp1,Hyal3,B2m,Anxa1,Cd53,Agpat6,Vim,Plekhb1,Ccnb1,Cd74,Ap3d1,Bbs2,Coro1a,Ptprf,Nrep,Agtr1a,Prtg,Lphn1,Hopx,ENSRNOP00000047118,Pmp22,Fbn1,Ahsg,Ddhd2,Nfib,Anxa3,Lox,Glul,Ctsz,Sh2b3,C3	51	2912	0.34	1.41e-05
GO:0050790	Regulation of catalytic activity	Psmb9,Marcks,Iscu,Por,Prdx2,Pttg1,Ahr,Tfpi,Arhgdib,Aurkb,Lgmn,Lyn,Serpina1,Il18,Serpina3n,Dap,Furin,Fdx1,Cyba,Ect2,Spink3,Nox4,Ube2s,Anxa1,Ccnb1,Cd74,Bcap31,Gmfg,Pcna,Agtr1a,Mdfic,Stradb,Lcp2,Pmp22,Cdc37,Fbn1,Plscr1,Ahsg,Anxa3,Sh2b3,C3,Slpi	42	2518	0.32	0.00058
GO:0050778	Positive regulation of immune response	Cd38,Rtn4,Vamp7,Lyn,Il18,C1qb,C1qa,B2m,Irf7,Anxa1,Cd74,Fcer1g,Lcp2,Plscr1,C3	15	623	0.48	0.0172
GO:0050776	Regulation of immune response	Cd38,Col3a1,Rtn4,Vamp7,Lyn,Il18,C1qb,C1qa,B2m,Irf7,Anxa1,Cd74,Dak,Fcer1g,Lcp2,Cdc37,Plscr1,C3	18	889	0.4	0.0251
GO:0050670	Regulation of lymphocyte proliferation	Aif1,Cd38,Ahr,Lyn,Il18,Anxa1,Cd74,Coro1a	8	242	0.62	0.0489
GO:0048856	Anatomical structure development	Alas2,Gatm,Psmb9,Marcks,Ipmk,Cdk1,Fabp7,Aif1,Ran,Rplp0,Col6a1,Afp,Cd38,Rogdi,Ephx1,Prdx2,Col3a1,Col5a2,Lum,Rtn4,Ahr,Crip1,Mgp,Aurkb,Vamp7,Lyn,Tagln2,Bsg,Dpysl2,Il18,Cel,Furin,Fdx1,Col1a2,C1qb,Dbnl,C1qa,Ldha,Sparc,Ect2,Spink3,Nox4,Gja4,Hyal3,Cdh17,Ninj1,B2m,Anxa1,Agpat6,Vim,Plekhb1,Ccnb1,Cd74,Bbs2,Coro1a,Ptprf,Nrep,Pcna,Pld4,Emcn,Marveld1,Agtr1a,Prtg,Fcer1g,Mki67,Lphn1,Sts,LOC259244,Hopx,Pam,Strad…	87	6089	0.25	5.94e-07
GO:0048732	Gland development	Alas2,Psmb9,Rplp0,Afp,Ephx1,Prdx2,Ahr,Crip1,Il18,Fdx1,Anxa1,Agpat6,Pcna,Mki67,Pam,Acat2	16	610	0.52	0.0048
GO:0048731	System development	Alas2,Gatm,Psmb9,Marcks,Ipmk,Cdk1,Fabp7,Aif1,Ran,Rplp0,Col6a1,Afp,Cd38,Rogdi,Ephx1,Prdx2,Col3a1,Col5a2,Lum,Rtn4,Ahr,Crip1,Mgp,Vamp7,Lyn,Bsg,Dpysl2,Il18,Cel,Fdx1,Col1a2,C1qb,Dbnl,C1qa,Ldha,Sparc,Ect2,Nox4,Gja4,Hyal3,Cdh17,Ninj1,B2m,Anxa1,Agpat6,Vim,Ccnb1,Cd74,Bbs2,Coro1a,Ptprf,Nrep,Pcna,Pld4,Emcn,Marveld1,Agtr1a,Prtg,Fcer1g,Mki67,Lphn1,Sts,Hopx,Pam,Pmp22,Fbn1,Plscr1,Col4a1,Ahsg,Acat2,Nfib,Anxa3,Lo…	79	5030	0.29	1.09e-07
GO:0048638	Regulation of developmental growth	Cdk1,Por,Rtn4,Lgmn,Dpysl2,Dbnl,Agpat6,Ccnb1,Bbs2,Hopx,C3	11	414	0.52	0.0372
GO:0048583	Regulation of response to stimulus	Marcks,Fabp7,Aif1,Por,Cd38,Prdx2,Col3a1,Rtn4,Tfpi,Arhgdib,Lgmn,Vamp7,Lyn,Il18,Il17ra,Furin,Adh7,C1qb,C1qa,Cyba,Spink3,Vdac2,Nox4,B2m,Irf7,Anxa1,Cd74,Bcap31,Bbs2,Amfr,Ptprf,Nrep,Dak,Pcna,Pld4,Agtr1a,Fcer1g,Mdfic,LOC259244,Hopx,Stradb,Lcp2,Pmp22,Cdc37,Fbn1,Plscr1,Ahsg,Lox,Acp5,Sri,Sh2b3,C3	52	4193	0.19	0.0366
GO:0048545	Response to steroid hormone	Aif1,Ran,Ugt2b1,Cd38,Ephx1,Ahr,Tfpi,Mgp,Serpina3n,C1qb,Sparc,Cyba,Anxa1,Pcna,Agtr1a,Maob,Pam,Anxa3,Lox,C3	20	476	0.72	1.25e-06
GO:0048534	Hematopoietic or lymphoid organ development	Alas2,Psmb9,Rogdi,Prdx2,Ahr,Lyn,Cdh17,B2m,Anxa1,Cd74,Coro1a,Pld4,Fcer1g,Plscr1,Acp5,Sh2b3	16	738	0.43	0.0261
GO:0048522	Positive regulation of cellular process	Marcks,Cdk1,Iscu,Aif1,Ran,Por,Cd38,Rogdi,Prdx2,Col3a1,Lum,Rtn4,Ahr,Rbm3,Aurkb,Lgmn,Vamp7,Lyn,Dpysl2,Il18,Dap,Uhrf2,Furin,Dbnl,C1qa,Ldha,Sparc,Cyba,Ect2,Spink3,Nox4,Hyal3,Cdh17,Ninj1,Ube2s,B2m,Irf7,Anxa1,Plvap,Cd53,Vim,Ccnb1,Cd74,Bcap31,Ap3d1,Coro1a,Ptprf,Pcna,Agtr1a,Fcer1g,Tspan31,Lphn1,Maob,Sts,Mdfic,LOC259244,Hopx,Sumo2,ENSRNOP00000047118,Stradb,Lcp2,Cdc37,Fbn1,Plscr1,Ahsg,Ddhd2,Nfib,Anxa3,Glul…	73	6252	0.16	0.0156
GO:0048519	Negative regulation of biological process	Cdk1,Iscu,Fabp7,Aif1,Por,Alb,Cd38,Prdx2,Col3a1,Pttg1,Col5a2,Rtn4,Ahr,Tfpi,Abcg5,Rbm3,Arhgdib,Aurkb,Lgmn,Lyn,Cyp2d4,Serpina1,Il18,Serpina3n,Dap,Furin,Fam111a,Sparc,Cyba,Spink3,Vdac2,Nox4,Ifitm2,Hyal3,B2m,Anxa1,Vim,Ccnb1,Cd74,Bbs2,Ifi30,Amfr,Coro1a,Gmfg,Ptprf,Dak,Pcna,Agtr1a,Prtg,Fcer1g,Ifitm1,Maob,Mdfic,LOC259244,Hopx,Sumo2,Stradb,Pmp22,Fbn1,Plscr1,Cd68,Ahsg,Nfib,Acp5,Sri,Ctsz,Sh2b3,C3,Slpi	69	5794	0.17	0.015
GO:0048518	Positive regulation of biological process	Gatm,Marcks,Cdk1,Iscu,Aif1,Ran,Por,Alb,Cd38,Rogdi,Prdx2,Col3a1,Lum,Rtn4,Ahr,Rbm3,Aurkb,Lgmn,Vamp7,Lyn,Bsg,Dpysl2,Il18,Dap,Il17ra,Uhrf2,Furin,Fdx1,C1qb,Dbnl,C1qa,Ldha,Sparc,Cyba,Ect2,Spink3,Nox4,Hyal3,Cdh17,Ninj1,Ube2s,B2m,Irf7,Anxa1,Plvap,Cd53,Vim,Ccnb1,Cd74,Bcap31,Ap3d1,Bbs2,Coro1a,Ptprf,Pcna,Agtr1a,Lrat,Fcer1g,Tspan31,Lphn1,Maob,Sts,Mdfic,LOC259244,Hopx,Sumo2,ENSRNOP00000047118,Stradb,Lcp2,Pmp2…	83	6791	0.18	0.00091
GO:0048513	Animal organ development	Alas2,Gatm,Psmb9,Marcks,Cdk1,Fabp7,Aif1,Ran,Rplp0,Col6a1,Afp,Rogdi,Ephx1,Prdx2,Col3a1,Col5a2,Lum,Rtn4,Ahr,Crip1,Mgp,Lyn,Bsg,Dpysl2,Il18,Fdx1,Col1a2,C1qb,Ldha,Sparc,Nox4,Hyal3,Cdh17,Ninj1,B2m,Anxa1,Agpat6,Vim,Ccnb1,Cd74,Bbs2,Coro1a,Pcna,Pld4,Agtr1a,Fcer1g,Mki67,Lphn1,Sts,Hopx,Pam,Pmp22,Fbn1,Plscr1,Col4a1,Ahsg,Acat2,Nfib,Anxa3,Lox,Acp5,Sri,Ctsz,Sh2b3,C3	65	3758	0.34	1.99e-07
GO:0046903	Secretion	Alas2,Rplp0,A1bg,Vamp7,Lyn,Cel,Furin,Anxa1,Agpat6,Coro1a,Agtr1a,Fcer1g,Mettl7a,Pam,Lcp2,Anxa3	16	618	0.51	0.0055
GO:0046686	Response to cadmium ion	Cdk1,Sparc,B2m,Sord,Pcna	5	81	0.89	0.0373
GO:0046164	Alcohol catabolic process	Cel,Aldh1b1,Adh7,Sord,Dak	5	58	1.03	0.0145
GO:0045927	Positive regulation of growth	Cdk1,Cd38,Rtn4,Ahr,Dbnl,Cyba,Ccnb1,Bbs2,Hopx,C3	10	330	0.58	0.0289
GO:0045861	Negative regulation of proteolysis	Por,Pttg1,Tfpi,Serpina1,Serpina3n,Furin,Spink3,Ahsg,Ctsz,C3,Slpi	11	433	0.5	0.0483
GO:0045859	Regulation of protein kinase activity	Marcks,Prdx2,Lyn,Il18,Ect2,Nox4,Ccnb1,Cd74,Agtr1a,Mdfic,Stradb,Lcp2,Pmp22,Cdc37,Fbn1,Ahsg,Sh2b3	17	816	0.42	0.0265
GO:0045596	Negative regulation of cell differentiation	Cd38,Prdx2,Col3a1,Col5a2,Rtn4,Ahr,Lyn,Il18,B2m,Anxa1,Vim,Cd74,Prtg,Hopx,Pmp22,Fbn1,Ctsz	17	818	0.41	0.0267
GO:0045595	Regulation of cell differentiation	Marcks,Por,Cd38,Prdx2,Col3a1,Col5a2,Rtn4,Ahr,Vamp7,Lyn,Dpysl2,Il18,Dbnl,Ect2,Rbp1,B2m,Anxa1,Cd53,Vim,Plekhb1,Cd74,Ap3d1,Ptprf,Nrep,Prtg,Hopx,Pmp22,Fbn1,Lox,Ctsz,Sh2b3	31	2037	0.28	0.0292
GO:0045321	Leukocyte activation	Aif1,Prdx2,A1bg,Vamp7,Lyn,Il18,C1qa,Clec4f,Cdh17,B2m,Anxa1,Cd74,Coro1a,Fcer1g,Mettl7a,Lcp2,Anxa3	17	566	0.57	0.00073
GO:0045087	Innate immune response	Aif1,Vamp7,Lyn,Il18,Serpina3n,C1qb,C1qa,Cyba,Ifitm2,B2m,Irf7,Anxa1,Vim,Coro1a,Pld4,Fcer1g,Ifitm1,Mx1,C3,Slpi	20	779	0.51	0.00093
GO:0045071	Negative regulation of viral genome replication	Fam111a,Ifitm2,Ifitm1,Plscr1,Slpi	5	68	0.96	0.0225
GO:0045055	Regulated exocytosis	A1bg,Vamp7,Lyn,Coro1a,Fcer1g,Mettl7a,Anxa3	7	170	0.71	0.0353
GO:0044419	Interspecies interaction between organisms	Psmb9,Aif1,Ugt2b1,Prdx2,Tfpi,Lyz2,Vamp7,Lyn,Serpina1,Il18,Serpina3n,Il17ra,Furin,Adh7,C1qb,C1qa,Sparc,Cyba,Ifitm2,Hyal3,B2m,Irf7,Anxa1,Vim,Coro1a,Il18bp,Pld4,Lrat,Fcer1g,Ifitm1,Mx1,Maob,Pmp22,Plscr1,Cd68,Anxa3,Acp5,C3,Slpi	39	1700	0.46	1.09e-06
GO:0044283	Small molecule biosynthetic process	Gatm,Ipmk,Ephx1,Rbp1,Psat1,Acsm2a,Sord,Cd74,Fdft1,Lss,Acat2,Dpyd,Glul	13	550	0.47	0.0366
GO:0044281	Small molecule metabolic process	Gatm,Ipmk,Ran,Por,Ugt2b1,Scpep1,Afp,Ephx1,Eci1,Cyp2d4,Cel,Aldh1b1,Adh7,Fdx1,Ldha,Rbp1,Psat1,Nox4,Acsm2a,Hyal3,Sord,Akr7a2,Aldh1a7,Agpat6,Cd74,Dak,Fdft1,Lrat,Lss,Pam,Pmp22,Fbn1,Acat2,Ddc,Dpyd,Glul,C3	37	1796	0.41	2.88e-05
GO:0044255	Cellular lipid metabolic process	Ipmk,Por,Scpep1,Ephx1,Sptssa,Eci1,Cyp2d4,Cel,Adh7,Rbp1,Acsm2a,Aldh1a7,Agpat6,Cd74,Fdft1,Lrat,Lss,Pam,ENSRNOP00000047118,Pmp22,Plscr1,Ddhd2,Acat2,C3	24	913	0.52	9.55e-05
GO:0044237	Cellular metabolic process	Alas2,Gatm,Psmb9,Ipmk,Cdk1,Iscu,Ran,Rplp0,Por,Ugt2b1,Scpep1,Afp,Ephx1,Prdx2,Fmo3,Col3a1,Pttg1,Sptssa,Ahr,Rbm3,Aurkb,Eif1ax,Lgmn,Lyn,Eci1,Cyp2d4,Gsta4,Il18,Dap,Cel,Uhrf2,Furin,Adh7,Fam111a,Fdx1,Oplah,Ldha,Cyba,Manba,Rbp1,Psat1,Nox4,Acsm2a,Cdca3,Hyal3,Sh3bgrl3,Ube2s,Sord,Anxa1,Plvap,Akr7a2,Aldh1a7,Agpat6,Ccnb1,Cd74,Amfr,Ptprf,Dak,Pcna,Fdft1,Pld4,Agtr1a,Lrat,Fcer1g,Lss,Mx1,Eif4h,Maob,Mdfic,LOC259244…	90	8245	0.14	0.0172
GO:0044093	Positive regulation of molecular function	Marcks,Iscu,Ran,Por,Prdx2,Arhgdib,Aurkb,Lgmn,Lyn,Il18,Dap,Fdx1,Cyba,Ect2,Nox4,Ube2s,B2m,Ccnb1,Cd74,Bcap31,Amfr,Pcna,Agtr1a,Mdfic,Stradb,Lcp2,Fbn1,Plscr1,Anxa3	29	1905	0.28	0.0381
GO:0044092	Negative regulation of molecular function	Por,Prdx2,Pttg1,Ahr,Tfpi,Aurkb,Lyn,Cyp2d4,Serpina1,Serpina3n,Dap,Furin,Adh7,Spink3,B2m,Anxa1,Ptprf,Plscr1,Ahsg,Anxa3,Sri,Ctsz,Sh2b3,C3,Slpi	25	1291	0.38	0.0051
GO:0043549	Regulation of kinase activity	Marcks,Prdx2,Lyn,Il18,Ect2,Nox4,Ccnb1,Cd74,Gmfg,Agtr1a,Mdfic,Stradb,Lcp2,Pmp22,Cdc37,Fbn1,Ahsg,Sh2b3	18	936	0.38	0.0372
GO:0043320	Natural killer cell degranulation	Vamp7,Coro1a	2	4	1.8	0.0498
GO:0043312	Neutrophil degranulation	A1bg,Vamp7,Mettl7a,Anxa3	4	33	1.18	0.0182
GO:0043299	Leukocyte degranulation	A1bg,Vamp7,Lyn,Coro1a,Mettl7a,Anxa3	6	59	1.1	0.0018
GO:0043200	Response to amino acid	Col6a1,Col3a1,Col5a2,Lyn,Col1a2,Cyba,Pcna,Col4a1	8	184	0.74	0.015
GO:0043085	Positive regulation of catalytic activity	Marcks,Iscu,Por,Prdx2,Arhgdib,Aurkb,Lgmn,Lyn,Il18,Dap,Fdx1,Cyba,Ect2,Nox4,Ube2s,Ccnb1,Cd74,Bcap31,Pcna,Agtr1a,Mdfic,Stradb,Lcp2,Fbn1,Plscr1	25	1503	0.32	0.0311
GO:0042981	Regulation of apoptotic process	Cdk1,Aif1,Por,Alb,Cd38,Prdx2,Aurkb,Lgmn,Lyn,Il18,Dap,Ldha,Ect2,Vdac2,Nox4,Anxa1,Cd74,Bcap31,Coro1a,Ptprf,Agtr1a,Fcer1g,Stradb,Pmp22,Plscr1,Lox,Ctsz	27	1720	0.29	0.038
GO:0042592	Homeostatic process	Alas2,Iscu,Cd38,Rogdi,Prdx2,Rtn4,Ahr,Abcg5,Lyn,Il18,Cyba,Spink3,Rbp1,Nox4,Ube2s,B2m,Anxa1,Bcap31,Ap3d1,Bbs2,Coro1a,Napsa,Pcna,Agtr1a,LOC259244,Fbn1,Lox,Acp5,Sri,Sh2b3	30	1887	0.3	0.0208
GO:0042572	Retinol metabolic process	Cyp2d4,Cel,Adh7,Rbp1,Aldh1a7,Lrat	6	48	1.19	0.00073
GO:0042542	Response to hydrogen peroxide	Cdk1,Il18,Ldha,Ect2,Anxa1,Il18bp,Pcna	7	171	0.71	0.0358
GO:0042493	Response to drug	Alas2,Psmb9,Cdk1,Por,Cd38,Abcg5,Lyn,Cyp2d4,Dpysl2,Ldha,Cyba,B2m,Sord,Anxa1,Ccnb1,Maob,Pam,Ddc,Lox,Dpyd	20	616	0.61	4.51e-05
GO:0042445	Hormone metabolic process	Scpep1,Afp,Cyp2d4,Cel,Furin,Adh7,Fdx1,Rbp1,Aldh1a7,Lrat	10	171	0.86	0.00035
GO:0042427	Serotonin biosynthetic process	Cyp2d4,Ddc	2	4	1.8	0.0498
GO:0042416	Dopamine biosynthetic process	Cyp2d4,Agtr1a,Ddc	3	13	1.46	0.0209
GO:0042267	Natural killer cell mediated cytotoxicity	Vamp7,Il18,Coro1a	3	16	1.37	0.03
GO:0042246	Tissue regeneration	Gatm,Ninj1,Anxa1,Vim,Ccnb1	5	83	0.88	0.0399
GO:0042221	Response to chemical	Alas2,Gatm,Psmb9,Cdk1,Aif1,Ran,Rplp0,Col6a1,Por,Ugt2b1,Afp,Alb,Cd38,Ephx1,Prdx2,Col3a1,Col5a2,Lum,Rtn4,Ahr,Tfpi,Crip1,Abcg5,Mgp,Lgmn,Lyn,Bsg,Cyp2d4,Gsta4,Serpina1,Dpysl2,Il18,Serpina3n,Il17ra,Laptm5,Inmt,Adh7,Fdx1,Col1a2,C1qb,C1qa,Ldha,Sparc,Cyba,Ect2,Spink3,Rbp1,Nox4,Ifitm2,Hyal3,B2m,Sord,Irf7,Anxa1,Plvap,Vim,Slc22a8,Ccnb1,Cd74,Bbs2,Amfr,Coro1a,Il18bp,Pcna,Dync1li2,Agtr1a,Lrat,Fcer1g,Ifitm1,Maob…	94	5773	0.31	8.87e-11
GO:0042127	Regulation of cell population proliferation	Cdk1,Aif1,Por,Cd38,Rogdi,Pttg1,Rtn4,Ahr,Lgmn,Lyn,Il18,Sparc,Cyba,Spink3,Nox4,B2m,Anxa1,Vim,Ccnb1,Cd74,Ifi30,Coro1a,Ptprf,Agtr1a,Tspan31,Sts,Pmp22,Nfib,Glul,Ctsz,Sh2b3	31	1853	0.32	0.0083
GO:0042119	Neutrophil activation	A1bg,Vamp7,Il18,Fcer1g,Mettl7a,Anxa3	6	49	1.19	0.0008
GO:0040008	Regulation of growth	Cdk1,Por,Cd38,Pttg1,Rtn4,Ahr,Lgmn,Dpysl2,Dbnl,Cyba,Cd53,Agpat6,Ccnb1,Bbs2,Hopx,Ahsg,C3	17	767	0.44	0.0168
GO:0034754	Cellular hormone metabolic process	Scpep1,Afp,Cyp2d4,Cel,Adh7,Rbp1,Aldh1a7,Lrat	8	115	0.94	0.00097
GO:0034614	Cellular response to reactive oxygen species	Cdk1,Prdx2,Il18,Ect2,Anxa1,Il18bp,Pcna	7	173	0.7	0.037
GO:0034308	Primary alcohol metabolic process	Cyp2d4,Cel,Aldh1b1,Adh7,Rbp1,Akr7a2,Aldh1a7,Lrat	8	77	1.11	8.83e-05
GO:0034097	Response to cytokine	Psmb9,Aif1,Rplp0,Cd38,Col3a1,Tfpi,Serpina1,Il18,Serpina3n,Il17ra,Laptm5,Sparc,Cyba,Ifitm2,Hyal3,Irf7,Anxa1,Plvap,Vim,Cd74,Bbs2,Coro1a,Il18bp,Lrat,Fcer1g,Ifitm1,Plscr1,Hnrnph1,Lox,Acp5,Sh2b3	31	986	0.59	8.31e-08
GO:0033076	Isoquinoline alkaloid metabolic process	Cyp2d4,Ddc	2	3	1.92	0.0373
GO:0032928	Regulation of superoxide anion generation	Il18,Cyba,Agtr1a,Acp5	4	33	1.18	0.0182
GO:0032879	Regulation of localization	Cdk1,Iscu,Aif1,Ran,Cd38,Col3a1,Rtn4,Ahr,Abcg5,Arhgdib,Aurkb,Lgmn,Vamp7,Lyn,Dpysl2,Il18,Furin,Mkln1,Sparc,Cyba,Ect2,Spink3,Nox4,Hyal3,B2m,Anxa1,Plvap,Vim,Cd74,Bcap31,Ap3d1,Bbs2,Coro1a,Agtr1a,Lrat,Fcer1g,Maob,Mdfic,LOC259244,Pam,ENSRNOP00000047118,Ahsg,Acat2,Kcnn2,Anxa3,Mest,Glul,Acp5,Sri,C3	50	3105	0.3	0.00016
GO:0032870	Cellular response to hormone stimulus	Aif1,Ran,Por,Ugt2b1,Ephx1,Ahr,Tfpi,Il18,Serpina3n,Fdx1,Col1a2,Cyba,Spink3,Anxa1,Bbs2,Agtr1a,LOC259244,Fbn1,Ahsg	19	629	0.58	0.0002
GO:0032787	Monocarboxylic acid metabolic process	Gatm,Por,Ugt2b1,Scpep1,Ephx1,Eci1,Cyp2d4,Adh7,Ldha,Rbp1,Acsm2a,Agpat6,Cd74,Pam,Acat2,C3	16	638	0.5	0.0075
GO:0032502	Developmental process	Alas2,Gatm,Psmb9,Marcks,Ipmk,Cdk1,Fabp7,Aif1,Ran,Rplp0,Col6a1,Afp,Cd38,Rogdi,Ephx1,Prdx2,Col3a1,Col5a2,Lum,Rtn4,Ahr,Crip1,Mgp,Aurkb,Vamp7,Lyn,Tagln2,Bsg,Dpysl2,Il18,Cel,Uhrf2,Furin,Fdx1,Col1a2,C1qb,Dbnl,C1qa,Ldha,Sparc,Ect2,Spink3,Nox4,Gja4,Hyal3,Cdh17,Ninj1,B2m,Anxa1,Plvap,Agpat6,Vim,Plekhb1,Ccnb1,Cd74,Bcap31,Ap3d1,Bbs2,Amfr,Coro1a,Ptprf,Nrep,Pcna,Pld4,Emcn,Marveld1,Agtr1a,Prtg,Fcer1g,Mki67,Lphn…	94	6549	0.25	7.71e-08
GO:0032501	Multicellular organismal process	Alas2,Gatm,Psmb9,Marcks,Ipmk,Cdk1,Fabp7,Aif1,Ran,Rplp0,Col6a1,Scpep1,Afp,Alb,Cd38,Rogdi,Ephx1,Prdx2,Col3a1,Col5a2,Lum,Rtn4,Ahr,Tfpi,Crip1,Abcg5,Mgp,Aurkb,Lgmn,Vamp7,Lyn,Bsg,Cyp2d4,Dpysl2,Il18,Cel,Furin,Fdx1,Col1a2,C1qb,Dbnl,C1qa,Ldha,Sparc,Cyba,Ect2,Spink3,Nox4,Gja4,Hyal3,Cdh17,Ninj1,B2m,Irf7,Anxa1,Agpat6,Vim,Plekhb1,Ccnb1,Cd74,Bcap31,Ap3d1,Bbs2,Amfr,Coro1a,Napsa,Ptprf,Nrep,Pcna,Pld4,Emcn,Marveld…	101	8527	0.17	0.00014
GO:0032355	Response to estradiol	Cd38,Ahr,Tfpi,Serpina1,Anxa1,Vim,Pcna,Pam,C3	9	238	0.67	0.0158
GO:0032101	Regulation of response to external stimulus	Fabp7,Aif1,Prdx2,Rtn4,Tfpi,Lgmn,Vamp7,Lyn,Il17ra,Cyba,Irf7,Anxa1,Cd74,Bbs2,Ptprf,Dak,Pld4,Fcer1g,Hopx,Pmp22,Cdc37,Plscr1,Ahsg,Acp5,Sh2b3,C3	26	951	0.53	1.9e-05
GO:0032091	Negative regulation of protein binding	Aurkb,B2m,Ptprf,Plscr1,Ctsz,Slpi	6	122	0.79	0.0357
GO:0031667	Response to nutrient levels	Gatm,Por,Alb,Abcg5,Mgp,Serpina3n,Dap,Ldha,Sparc,Cyba,Spink3,Rbp1,Sord,Vim,Bbs2,Lrat,Cd68,Acat2,Dpyd,Glul,Acp5	21	693	0.58	6.35e-05
GO:0031347	Regulation of defense response	Vamp7,Lyn,Il17ra,Cyba,Irf7,Anxa1,Dak,Pld4,Fcer1g,Pmp22,Cdc37,Plscr1,Ahsg,Acp5,C3	15	624	0.48	0.0172
GO:0031100	Animal organ regeneration	Alas2,Cdk1,Afp,Il18,Pcna,Ahsg,Anxa3	7	165	0.72	0.0311
GO:0031099	Regeneration	Alas2,Gatm,Cdk1,Afp,Il18,Ninj1,Anxa1,Vim,Ccnb1,Ptprf,Nrep,Pcna,Ahsg,Anxa3	14	274	0.81	2.29e-05
GO:0030335	Positive regulation of cell migration	Aif1,Rtn4,Lgmn,Lyn,Il18,Furin,Sparc,Nox4,Anxa1,Plvap,Cd74,Coro1a,ENSRNOP00000047118,Anxa3,Acp5	15	600	0.5	0.0124
GO:0030334	Regulation of cell migration	Aif1,Col3a1,Rtn4,Arhgdib,Lgmn,Lyn,Il18,Furin,Sparc,Nox4,Anxa1,Plvap,Vim,Cd74,Coro1a,ENSRNOP00000047118,Anxa3,Glul,Acp5	19	982	0.38	0.0286
GO:0030199	Collagen fibril organization	Col3a1,Col5a2,Lum,Col1a2,Lox	5	50	1.1	0.0079
GO:0030193	Regulation of blood coagulation	Prdx2,Tfpi,Lyn,Fcer1g,Sh2b3	5	81	0.89	0.0373
GO:0030162	Regulation of proteolysis	Psmb9,Por,Pttg1,Tfpi,Lgmn,Lyn,Serpina1,Serpina3n,Dap,Furin,Spink3,Bcap31,Sumo2,Ahsg,Ctsz,C3,Slpi	17	868	0.39	0.0405
GO:0022603	Regulation of anatomical structure morphogenesis	Marcks,Por,Col5a2,Rtn4,Vamp7,Dpysl2,Il18,Mkln1,Dbnl,Sparc,Anxa1,Cd53,Vim,Coro1a,Ptprf,Agtr1a,ENSRNOP00000047118,Ddhd2,Nfib,Anxa3,Glul,Sh2b3,C3	23	1166	0.39	0.0076
GO:0019884	Antigen processing and presentation of exogenous antigen	B2m,Cd74,Ap3d1,Ifi30,Fcer1g	5	43	1.16	0.0046
GO:0019882	Antigen processing and presentation	Psmb9,B2m,Cd74,Ap3d1,Ifi30,Fcer1g	6	119	0.8	0.033
GO:0019752	Carboxylic acid metabolic process	Gatm,Por,Ugt2b1,Scpep1,Ephx1,Eci1,Cyp2d4,Adh7,Ldha,Rbp1,Psat1,Nox4,Acsm2a,Hyal3,Agpat6,Cd74,Pam,Acat2,Ddc,Dpyd,Glul,C3	22	985	0.45	0.0024
GO:0019221	Cytokine-mediated signaling pathway	Il18,Il17ra,Ifitm2,Irf7,Plvap,Cd74,Bbs2,Fcer1g,Ifitm1,Sh2b3	10	313	0.6	0.0218
GO:0014070	Response to organic cyclic compound	Alas2,Psmb9,Cdk1,Aif1,Ran,Rplp0,Ugt2b1,Cd38,Ephx1,Lum,Ahr,Tfpi,Mgp,Lyn,Bsg,Serpina1,Dpysl2,Il18,Serpina3n,Fdx1,Col1a2,C1qb,Ldha,Sparc,Cyba,Nox4,Anxa1,Vim,Slc22a8,Ccnb1,Pcna,Agtr1a,Maob,Sts,Pam,Anxa3,Lox,Dpyd,Acp5,C3	40	1313	0.58	6.13e-10
GO:0010951	Negative regulation of endopeptidase activity	Por,Pttg1,Tfpi,Serpina1,Serpina3n,Furin,Spink3,Ahsg,C3,Slpi	10	298	0.62	0.0172
GO:0010941	Regulation of cell death	Cdk1,Aif1,Por,Alb,Cd38,Prdx2,Ahr,Aurkb,Lgmn,Lyn,Il18,Dap,C1qa,Ldha,Ect2,Vdac2,Nox4,Anxa1,Cd74,Bcap31,Coro1a,Ptprf,Agtr1a,Fcer1g,Stradb,Pmp22,Plscr1,Lox,Ctsz	29	1915	0.28	0.0402
GO:0010243	Response to organonitrogen compound	Gatm,Psmb9,Cdk1,Aif1,Rplp0,Col6a1,Por,Ugt2b1,Col3a1,Col5a2,Ahr,Lgmn,Lyn,Bsg,Dpysl2,Il18,Serpina3n,Fdx1,Col1a2,Ldha,Sparc,Cyba,Spink3,Nox4,Anxa1,Vim,Slc22a8,Amfr,Pcna,Agtr1a,Fcer1g,Sts,LOC259244,Fbn1,Cd68,Col4a1,Ahsg,Hnrnph1,Ddc	39	1313	0.57	1.93e-09
GO:0010043	Response to zinc ion	Crip1,Gsta4,Vim,Pam,Acp5	5	70	0.95	0.0249
GO:0010038	Response to metal ion	Alas2,Gatm,Cdk1,Alb,Crip1,Mgp,Lgmn,Bsg,Gsta4,Serpina1,C1qa,Sparc,Ect2,B2m,Sord,Vim,Ccnb1,Pcna,Maob,Pam,Acp5,C3	22	516	0.73	1.98e-07
GO:0010035	Response to inorganic substance	Alas2,Gatm,Cdk1,Rplp0,Alb,Prdx2,Crip1,Mgp,Lgmn,Bsg,Gsta4,Serpina1,Il18,C1qa,Ldha,Sparc,Ect2,B2m,Sord,Anxa1,Vim,Ccnb1,Il18bp,Pcna,Maob,Pam,Acp5,C3	28	775	0.66	4.28e-08
GO:0010033	Response to organic substance	Alas2,Gatm,Psmb9,Cdk1,Aif1,Ran,Rplp0,Col6a1,Por,Ugt2b1,Afp,Alb,Cd38,Ephx1,Prdx2,Col3a1,Col5a2,Lum,Ahr,Tfpi,Crip1,Mgp,Lgmn,Lyn,Bsg,Cyp2d4,Serpina1,Dpysl2,Il18,Serpina3n,Il17ra,Laptm5,Adh7,Fdx1,Col1a2,C1qb,Ldha,Sparc,Cyba,Spink3,Rbp1,Nox4,Ifitm2,Hyal3,B2m,Sord,Irf7,Anxa1,Plvap,Vim,Slc22a8,Ccnb1,Cd74,Bbs2,Amfr,Coro1a,Il18bp,Pcna,Dync1li2,Agtr1a,Lrat,Fcer1g,Ifitm1,Maob,Sts,LOC259244,Pam,Pmp22,Fbn1,Pl…	86	3512	0.49	1.29e-19
GO:0009991	Response to extracellular stimulus	Gatm,Aif1,Por,Alb,Abcg5,Mgp,Lyn,Serpina3n,Dap,Ldha,Sparc,Cyba,Spink3,Rbp1,Sord,Vim,Bbs2,Lrat,Cd68,Acat2,Dpyd,Glul,Acp5	23	729	0.6	1.14e-05
GO:0009987	Cellular process	Alas2,Gatm,Psmb9,Marcks,Ipmk,Cdk1,Iscu,Fabp7,Tubb5,Aif1,Ran,Rplp0,Col6a1,Por,Ugt2b1,Scpep1,Afp,Alb,Cd38,Rogdi,Ephx1,Prdx2,Fmo3,Col3a1,Pttg1,Col5a2,Sptssa,Lum,A1bg,Rtn4,Ahr,Tfpi,Crip1,Abcg5,Rbm3,Mgp,Lyz2,Arhgdib,Aurkb,Eif1ax,Lgmn,Vamp7,Lyn,Tagln2,Bsg,Lgals2,Eci1,Cyp2d4,Gsta4,Dpysl2,Il18,Serpina3n,Dap,Cel,Il17ra,Laptm5,Uhrf2,Furin,Adh7,Fam111a,Fdx1,Col1a2,Oplah,Mkln1,C1qb,Dbnl,C1qa,Ldha,Sparc,Cyba,…	162	18050	0.05	0.0293
GO:0009719	Response to endogenous stimulus	Gatm,Aif1,Ran,Rplp0,Col6a1,Por,Ugt2b1,Cd38,Ephx1,Col3a1,Col5a2,Ahr,Tfpi,Mgp,Lgmn,Lyn,Bsg,Il18,Serpina3n,Fdx1,Col1a2,C1qb,Ldha,Sparc,Cyba,Spink3,Nox4,Sord,Anxa1,Vim,Bbs2,Coro1a,Pcna,Dync1li2,Agtr1a,Fcer1g,Maob,Sts,LOC259244,Pam,Fbn1,Cd68,Col4a1,Ahsg,Hnrnph1,Anxa3,Ddc,Lox,C3	49	1761	0.54	3.48e-11
GO:0009653	Anatomical structure morphogenesis	Ipmk,Col6a1,Rogdi,Col3a1,Col5a2,Rtn4,Ahr,Crip1,Mgp,Bsg,Dpysl2,Il18,Furin,Col1a2,Dbnl,Ect2,Nox4,Cdh17,Ninj1,Bbs2,Emcn,Mki67,LOC259244,Hopx,Pam,Stradb,Pmp22,Fbn1,Col4a1,Nfib,Lox,Glul,Acp5,Ctsz	34	2427	0.24	0.0497
GO:0009636	Response to toxic substance	Cdk1,Ephx1,Prdx2,Ahr,Lyn,Gsta4,Inmt,Slc22a8,Ccnb1,Maob,Ddc	11	290	0.68	0.0039
GO:0009628	Response to abiotic stimulus	Alas2,Psmb9,Aif1,Cd38,Col3a1,Rtn4,Crip1,Abcg5,Rbm3,Mgp,Aurkb,Lgmn,Lyn,Serpina1,Il18,Ldha,Sparc,Cyba,Ect2,Nox4,Hyal3,Sord,Anxa1,Vim,Ccnb1,Pcna,Agtr1a,Sts,Pam,Pmp22,Ddhd2	31	1428	0.43	0.0001
GO:0009617	Response to bacterium	Psmb9,Ugt2b1,Prdx2,Tfpi,Lyz2,Lyn,Serpina1,Il18,Serpina3n,Adh7,Sparc,B2m,Vim,Il18bp,Lrat,Fcer1g,Maob,Pmp22,Plscr1,Cd68,Anxa3,Acp5,C3,Slpi	24	871	0.54	4.64e-05
GO:0009605	Response to external stimulus	Gatm,Psmb9,Fabp7,Aif1,Por,Ugt2b1,Alb,Prdx2,Col3a1,Tfpi,Abcg5,Mgp,Lyz2,Vamp7,Lyn,Bsg,Serpina1,Dpysl2,Il18,Serpina3n,Dap,Il17ra,Adh7,C1qb,C1qa,Ldha,Sparc,Cyba,Spink3,Rbp1,Ifitm2,Hyal3,B2m,Sord,Irf7,Anxa1,Vim,Ccnb1,Ap3d1,Bbs2,Coro1a,Il18bp,Pld4,Agtr1a,Lrat,Fcer1g,Ifitm1,Mx1,Maob,ENSRNOP00000047118,Pmp22,Plscr1,Cd68,Acat2,Nfib,Anxa3,Lox,Dpyd,Glul,Acp5,C3,Slpi	62	2753	0.45	3.93e-11
GO:0009314	Response to radiation	Col3a1,Crip1,Abcg5,Aurkb,Il18,Cyba,Ect2,Nox4,Hyal3,Anxa1,Vim,Pcna,Ddhd2	13	545	0.47	0.035
GO:0008299	Isoprenoid biosynthetic process	Rbp1,Fdft1,Lss,Acat2	4	40	1.1	0.0289
GO:0008284	Positive regulation of cell population proliferation	Cdk1,Aif1,Cd38,Rogdi,Rtn4,Lgmn,Lyn,Il18,Cyba,Spink3,Anxa1,Vim,Ccnb1,Cd74,Coro1a,Agtr1a,Tspan31,Sts,Glul,Ctsz	20	1111	0.35	0.0399
GO:0008203	Cholesterol metabolic process	Cel,Fdx1,Fdft1,Lss,Pmp22,Acat2	6	127	0.77	0.0399
GO:0008202	Steroid metabolic process	Afp,Cyp2d4,Cel,Fdx1,Fdft1,Lss,Sts,Pmp22,Acat2	9	248	0.66	0.0189
GO:0008152	Metabolic process	Alas2,Gatm,Psmb9,Ipmk,Cdk1,Iscu,Aif1,Ran,Rplp0,Cyp3a62,Por,Ugt2b1,Scpep1,Afp,Ephx1,Prdx2,Fmo3,Col3a1,Pttg1,Sptssa,Ahr,Rbm3,Lyz2,Aurkb,Eif1ax,Lgmn,Lyn,Eci1,Cyp2d4,Plbd1,Gsta4,Il18,Dap,Cel,Aldh1b1,Inmt,Uhrf2,Furin,Adh7,Fam111a,Fdx1,Col1a2,Oplah,Dpp7,Ldha,Cyba,Manba,Tinagl1,Rbp1,Psat1,Nox4,Acsm2a,Cdca3,Hyal3,Sh3bgrl3,Ube2s,B2m,Sord,Irf7,Anxa1,Plvap,Akr7a2,Aldh1a7,Agpat6,Ccnb1,Cd74,Ap3d1,Ifi30,Amfr,C…	111	9342	0.17	1.64e-05
GO:0007584	Response to nutrient	Gatm,Por,Alb,Abcg5,Mgp,Serpina3n,Ldha,Sparc,Rbp1,Vim,Lrat,Acat2,Dpyd,Acp5	14	292	0.78	4.34e-05
GO:0007568	Aging	Cdk1,Rtn4,Aurkb,Furin,C1qb,C1qa,Nox4,B2m,Vim,Amfr,Agtr1a,Pmp22,Cd68,Ddc	14	463	0.58	0.0038
GO:0007507	Heart development	Marcks,Cdk1,Col3a1,Rtn4,Ahr,Sparc,Nox4,Ccnb1,Pcna,Agtr1a,Hopx,Pam,Fbn1,Lox,Sri	15	610	0.49	0.0146
GO:0007275	Multicellular organism development	Alas2,Gatm,Psmb9,Marcks,Ipmk,Cdk1,Fabp7,Aif1,Ran,Rplp0,Col6a1,Afp,Cd38,Rogdi,Ephx1,Prdx2,Col3a1,Col5a2,Lum,Rtn4,Ahr,Crip1,Mgp,Aurkb,Vamp7,Lyn,Bsg,Dpysl2,Il18,Cel,Furin,Fdx1,Col1a2,C1qb,Dbnl,C1qa,Ldha,Sparc,Ect2,Nox4,Gja4,Hyal3,Cdh17,Ninj1,B2m,Anxa1,Agpat6,Vim,Plekhb1,Ccnb1,Cd74,Bbs2,Coro1a,Ptprf,Nrep,Pcna,Pld4,Emcn,Marveld1,Agtr1a,Prtg,Fcer1g,Mki67,Lphn1,Sts,Hopx,Pam,Pmp22,Fbn1,Plscr1,Col4a1,Ahsg…	83	5716	0.26	8.97e-07
GO:0006955	Immune response	Aif1,A1bg,Crip1,Vamp7,Lyn,Il18,Serpina3n,C1qb,Dbnl,C1qa,Cyba,Ifitm2,Cdh17,B2m,Irf7,Anxa1,Vim,Cd74,Coro1a,Il18bp,Pld4,Fcer1g,Mettl7a,Ifitm1,Mx1,ENSRNOP00000047118,Pmp22,Plscr1,Cd68,Anxa3,C3,Slpi	32	1466	0.44	6.35e-05
GO:0006952	Defense response	Aif1,Prdx2,Rtn4,Lyz2,Vamp7,Lyn,Serpina1,Il18,Serpina3n,Il17ra,C1qb,C1qa,Cyba,Nox4,Ifitm2,Hyal3,B2m,Irf7,Anxa1,Vim,Cd74,Coro1a,Pld4,Agtr1a,Fcer1g,Ifitm1,Mx1,Plscr1,Cd68,Ahsg,Anxa3,Acp5,C3,Slpi	34	1429	0.47	5.05e-06
GO:0006950	Response to stress	Alas2,Gatm,Cdk1,Aif1,Alb,Cd38,Prdx2,Col3a1,Pttg1,Rtn4,Tfpi,Crip1,Rbm3,Lyz2,Vamp7,Lyn,Gsta4,Serpina1,Il18,Serpina3n,Dap,Il17ra,C1qb,C1qa,Ldha,Sparc,Cyba,Ect2,Nox4,Gja4,Ifitm2,Hyal3,B2m,Sord,Irf7,Anxa1,Vim,Ccnb1,Cd74,Amfr,Coro1a,Ptprf,Il18bp,Nrep,Pcna,Pld4,Agtr1a,Fcer1g,Ifitm1,Mx1,Mdfic,Pam,Stradb,Pmp22,Cdc37,Plscr1,Cd68,Ahsg,Anxa3,Lox,Glul,Acp5,C3,Slpi	64	3683	0.34	2.33e-07
GO:0006776	Vitamin a metabolic process	Rbp1,Lrat	2	3	1.92	0.0373
GO:0006721	Terpenoid metabolic process	Scpep1,Cyp2d4,Cel,Adh7,Rbp1,Aldh1a7,Fdft1,Lrat,Lss	9	91	1.09	2.85e-05
GO:0006720	Isoprenoid metabolic process	Scpep1,Cyp2d4,Cel,Adh7,Rbp1,Aldh1a7,Fdft1,Lrat,Lss,Acat2	10	113	1.04	1.64e-05
GO:0006066	Alcohol metabolic process	Ipmk,Ephx1,Cyp2d4,Cel,Aldh1b1,Adh7,Fdx1,Rbp1,Sord,Akr7a2,Aldh1a7,Dak,Fdft1,Lrat,Lss,Pmp22,Acat2	17	340	0.8	1.67e-06
GO:0002720	Positive regulation of cytokine production involved in immune response	Rtn4,Il18,B2m,Cd74,Fcer1g	5	66	0.98	0.0209
GO:0002699	Positive regulation of immune effector process	Rtn4,Vamp7,Lyn,Il18,B2m,Anxa1,Cd74,Fcer1g,C3	9	266	0.63	0.0267
GO:0002684	Positive regulation of immune system process	Aif1,Cd38,Rtn4,Lgmn,Vamp7,Lyn,Il18,C1qb,C1qa,B2m,Irf7,Anxa1,Plvap,Cd74,Ap3d1,Coro1a,Fcer1g,Lcp2,Plscr1,C3	20	1018	0.39	0.0192
GO:0002576	Platelet degranulation	A1bg,Lyn,Fcer1g	3	17	1.34	0.0335
GO:0002520	Immune system development	Alas2,Psmb9,Rogdi,Prdx2,Ahr,Lyn,Cdh17,B2m,Anxa1,Cd74,Coro1a,Pld4,Fcer1g,Plscr1,Acp5,Sh2b3,C3	17	774	0.44	0.0178
GO:0002478	Antigen processing and presentation of exogenous peptide antigen	B2m,Cd74,Ifi30,Fcer1g	4	36	1.14	0.0222
GO:0002460	Adaptive immune response based on somatic recombination of immune receptors built from immunoglobulin superfamily domains	Il18,C1qb,C1qa,Irf7,Cd74,Il18bp,Fcer1g,C3	8	222	0.65	0.0339
GO:0002449	Lymphocyte mediated immunity	Vamp7,Il18,C1qb,C1qa,Irf7,Cd74,Coro1a,Fcer1g,C3	9	192	0.77	0.0042
GO:0002444	Myeloid leukocyte mediated immunity	A1bg,Vamp7,Lyn,Mettl7a,Anxa3	5	79	0.9	0.0355
GO:0002376	Immune system process	Alas2,Psmb9,Aif1,Cd38,Rogdi,Prdx2,A1bg,Rtn4,Ahr,Crip1,Vamp7,Lyn,Il18,Serpina3n,Il17ra,C1qb,Dbnl,C1qa,Cyba,Clec4f,Ifitm2,Cdh17,B2m,Irf7,Anxa1,Vim,Cd74,Ap3d1,Ifi30,Coro1a,Il18bp,Pld4,Fcer1g,Mettl7a,Ifitm1,Mx1,ENSRNOP00000047118,Lcp2,Pmp22,Plscr1,Cd68,Anxa3,Acp5,Sh2b3,C3,Slpi	46	2465	0.37	1.32e-05
GO:0002283	Neutrophil activation involved in immune response	A1bg,Vamp7,Fcer1g,Mettl7a,Anxa3	5	38	1.22	0.003
GO:0002275	Myeloid cell activation involved in immune response	A1bg,Vamp7,Lyn,Fcer1g,Mettl7a,Anxa3	6	81	0.97	0.0074
GO:0002274	Myeloid leukocyte activation	Aif1,A1bg,Vamp7,Lyn,Il18,C1qa,Fcer1g,Mettl7a,Lcp2,Anxa3	10	158	0.9	0.00019
GO:0002252	Immune effector process	Prdx2,A1bg,Vamp7,Lyn,Il18,C1qb,C1qa,Ifitm2,Cdh17,Irf7,Cd74,Coro1a,Fcer1g,Mettl7a,Ifitm1,Mx1,Plscr1,Anxa3,C3	19	608	0.59	0.00013
GO:0002019	Regulation of renal output by angiotensin	Cyba,Agtr1a	2	4	1.8	0.0498
GO:0001889	Liver development	Alas2,Psmb9,Afp,Ephx1,Ahr,Il18,Anxa1,Pcna,Mki67,Acat2	10	239	0.72	0.004
GO:0001819	Positive regulation of cytokine production	Aif1,Lum,Rtn4,Bsg,Il18,Il17ra,Furin,Cyba,B2m,Irf7,Anxa1,Cd74,Agtr1a,Fcer1g,C3	15	480	0.59	0.0015
GO:0001817	Regulation of cytokine production	Aif1,Lum,Rtn4,Lyn,Bsg,Il18,Il17ra,Furin,Cyba,B2m,Irf7,Anxa1,Cd74,Dak,Pld4,Agtr1a,Fcer1g,Acp5,C3	19	771	0.49	0.0025
GO:0001816	Cytokine production	Aif1,Lyn,Il18,Irf7,Ap3d1,Fcer1g,Lcp2	7	180	0.69	0.0423
GO:0001775	Cell activation	Aif1,Prdx2,A1bg,Vamp7,Lyn,Il18,Il17ra,C1qa,Clec4f,Cdh17,B2m,Anxa1,Cd74,Coro1a,Fcer1g,Mettl7a,Lcp2,Anxa3	18	670	0.53	0.0015
GO:0001523	Retinoid metabolic process	Scpep1,Cyp2d4,Cel,Adh7,Rbp1,Aldh1a7,Lrat	7	70	1.1	0.00046
GO:0001501	Skeletal system development	Col6a1,Col3a1,Col5a2,Lum,Mgp,Col1a2,Sparc,Hyal3,Bbs2,Fbn1,Nfib,Acp5,Sh2b3	13	541	0.48	0.0333

## Sheet: GSE13270_16 weeks
#term ID	term description	matching proteins in your network (labels)	observed gene count	background gene count	strength	false discovery rate
GO:0033993	Response to lipid	Alas2,Aif1,Rplp0,Bdh1,Ugt2b1,Cd38,Gc,Apoa2,Prdx2,Tfpi,Cst3,Mgp,Mgst1,Cat,Igfbp3,Cyp4a8,Serpina1,Acadm,Col1a2,C1qb,Fabp3,Sparc,Rbp1,B2m,Anxa1,Acta1,Ucp2,Vim,Tgfb1,Lrat,Eef2,Maob,Pam,Hp,Anxa3,Lox,Mest,C3,Slpi	39	1199	0.62	6.5e-11
GO:0050896	Response to stimulus	Alas2,Psmb9,Cdk1,Fabp7,Aif1,Rplp0,Bdh1,Ugt2b15,Ugt2b1,Sec31a,Alb,Cd38,Gc,Apoa2,Prdx2,Col3a1,Pttg1,Col5a2,Sod3,Rtn4,Tfpi,Cst3,Mgp,Lyz2,Nnmt,Ncstn,Aurkb,Fabp1,Tm2d1,Adrm1,Mgst1,Oxr1,Vamp7,Cat,Igfbp3,Cyp4a8,Serpina1,Fkbp1a,Dpysl2,Acadm,Shfm1,Laptm5,Inmt,Col1a2,Cyp2e1,C1qb,C1qc,RGD1564614,Fabp3,C1qa,Ldha,Sparc,Rnf111,Spink3,Pgam2,Sepw1,Rbp1,Nox4,Evl,Ak3,Epn1,Hyal3,Rgs14,Cdh17,Ttr,Ckm,B2m,Sord,Plg,Irf…	117	9725	0.19	1.34e-07
GO:0048732	Gland development	Alas2,Psmb9,Rplp0,Bdh1,Gc,Prdx2,Cst3,Adrm1,Acadm,Ak3,Anxa1,Ucp2,Tgfb1,Cdc42,Lsr,Vtn,Pam,Hp,Prlr	19	610	0.61	0.00011
GO:0001889	Liver development	Alas2,Psmb9,Bdh1,Acadm,Ak3,Anxa1,Ucp2,Tgfb1,Lsr,Vtn,Hp	11	239	0.77	0.00075
GO:0008152	Metabolic process	Alas2,Psmb8,Psmb9,Pcbd1,Cdk1,Iscu,Aif1,Rplp0,Cyp3a62,Plbd2,Bdh1,Ugt2b15,Ugt2b1,Gc,Apoa2,Prdx2,Col3a1,Pttg1,Sod3,Sptssa,Lyz2,Nnmt,Ncstn,Aurkb,Ubl7,Adrm1,Mgst1,Oxr1,Cat,Igfbp3,Eci1,Cyp4a8,Fkbp1a,Hsd17b12,Acadm,Shfm1,Cel,Inmt,Furin,Tmem150a,Col1a2,Oplah,Cyp2e1,RGD1564614,Fabp3,Ldha,Rnf111,Pgam2,Rbp1,Nox4,Irf2bp1,Mcfd2,Ak3,Hyal3,Sh3bgrl3,Ttr,Ckm,Ube2s,B2m,Sord,Plg,Irf7,Anxa1,Akr7a2,Ucp2,Cd74,Ap3d1,Ap…	101	9342	0.15	0.0015
GO:0034284	Response to monosaccharide	Apoa2,Cat,Ldha,Sparc,Nox4,Ucp2,Tgfb1,Cdc42,Hp,Glul	10	231	0.75	0.0024
GO:0051046	Regulation of secretion	Cd38,Rtn4,Vamp7,Igfbp3,Dpysl2,Spink3,Hyal3,Anxa1,Ucp2,Cd74,Tgfb1,Cdc42,Fcer1g,Ptbp1,Maob,Pam,Arf1,Glul,Sri	19	866	0.45	0.0056
GO:0042592	Homeostatic process	Alas2,Iscu,Cd38,Apoa2,Prdx2,Rtn4,Ncstn,Fkbp1a,Fabp3,Spink3,Rbp1,Nox4,Slc4a2,Ube2s,B2m,Plg,Anxa1,Ucp2,Bcap31,Ap3d1,Coro1a,Tgfb1,Slc4a1,Hpn,Lsr,Fbn1,Tm9sf4,Arf1,Lox,Sri,ENSRNOP00000067246	31	1887	0.33	0.0059
GO:0002684	Positive regulation of immune system process	Aif1,Cd38,Rtn4,Vamp7,C1qb,C1qc,RGD1564614,C1qa,B2m,Irf7,Anxa1,Cd99l2,Cd74,Ap3d1,Coro1a,Tgfb1,Slc4a1,Fcer1g,Ube2n,C3	20	1018	0.4	0.012
GO:0006954	Inflammatory response	Aif1,Apoa2,Prdx2,Rtn4,Serpina1,RGD1564614,C1qa,Hyal3,Anxa1,Tgfb1,Fcer1g,Hp,Ahsg,C3	14	568	0.5	0.0132
GO:0009056	Catabolic process	Psmb8,Psmb9,Plbd2,Ugt2b15,Ugt2b1,Apoa2,Prdx2,Ubl7,Adrm1,Cat,Eci1,Acadm,Cel,Tmem150a,Cyp2e1,Fabp3,Ldha,Rnf111,Pgam2,Hyal3,Ube2s,Sord,Plg,Tgfb1,Hibch,Ptbp1,Maob,ENSRNOP00000047118,Aadac,Ube2n,Dpyd,Ctsz	32	2117	0.29	0.015
GO:0044255	Cellular lipid metabolic process	Apoa2,Sptssa,Cat,Eci1,Cyp4a8,Hsd17b12,Acadm,Cel,Tmem150a,Cyp2e1,Fabp3,Rbp1,Ttr,Cd74,Lrat,Pam,ENSRNOP00000047118,C3	18	913	0.41	0.0208
GO:0051246	Regulation of protein metabolic process	Psmb8,Psmb9,Aif1,Prdx2,Pttg1,Tfpi,Cst3,Ncstn,Fabp1,Adrm1,Oxr1,Igfbp3,Serpina1,Fkbp1a,Furin,Rnf111,Spink3,Nox4,Rgs14,Ube2s,Vim,Cd74,Bcap31,Ltbr,Tgfb1,Hpn,Cdc42,Eef2,Eif4h,Ptbp1,Sumo2,Vtn,ENSRNOP00000047118,Cdc37,Fbn1,Ahsg,Prlr,Eif4g2,Ube2n,Lox,Ctsz,C3,Slpi	43	3278	0.23	0.0211
GO:0045834	Positive regulation of lipid metabolic process	Apoa2,Fabp1,Anxa1,Cd74,Tgfb1,Cdc42,Aadac	7	177	0.71	0.0329
GO:0006776	Vitamin a metabolic process	Rbp1,Lrat	2	3	1.94	0.0336
GO:0032268	Regulation of cellular protein metabolic process	Aif1,Prdx2,Pttg1,Tfpi,Cst3,Fabp1,Adrm1,Oxr1,Igfbp3,Serpina1,Fkbp1a,Furin,Rnf111,Spink3,Nox4,Rgs14,Ube2s,Vim,Cd74,Bcap31,Ltbr,Tgfb1,Hpn,Cdc42,Eef2,Eif4h,Ptbp1,Sumo2,Vtn,ENSRNOP00000047118,Cdc37,Fbn1,Ahsg,Prlr,Eif4g2,Ube2n,Lox,Ctsz,C3,Slpi	40	3128	0.22	0.0473
rno00140	Steroid hormone biosynthesis	Cyp3a62,Ugt2b15,Ugt2b1,Hsd17b12,Cyp2e1,Sts	6	72	1.03	0.0034
rno03320	PPAR signaling pathway	Fabp7,Apoa2,Fabp1,Cyp4a8,Acadm,Fabp3	6	78	1	0.0039
rno04933	AGE-RAGE signaling pathway in diabetic complications	Col3a1,Col1a2,Nox4,Tgfb1,Cdc42,Col4a1	6	93	0.92	0.0077
rno00982	Drug metabolism - cytochrome P450	Ugt2b15,Ugt2b1,Mgst1,Cyp2e1,Maob	5	63	1.01	0.0098
rno00983	Drug metabolism - other enzymes	Ugt2b15,Ugt2b1,Mgst1,Cyp2e1,Dpyd	5	81	0.9	0.0195
rno05150	Staphylococcus aureus infection	C1qb,C1qc,C1qa,Plg,C3	5	88	0.87	0.0195
rno05204	Chemical carcinogenesis	Cyp3a62,Ugt2b15,Ugt2b1,Mgst1,Cyp2e1	5	82	0.9	0.0195
rno00040	Pentose and glucuronate interconversions	Ugt2b15,Ugt2b1,Sord	3	28	1.14	0.0377
GO:0010033	Response to organic substance	Alas2,Psmb9,Cdk1,Aif1,Rplp0,Bdh1,Ugt2b1,Alb,Cd38,Gc,Apoa2,Prdx2,Col3a1,Col5a2,Tfpi,Cst3,Mgp,Nnmt,Ncstn,Mgst1,Cat,Igfbp3,Cyp4a8,Serpina1,Fkbp1a,Dpysl2,Acadm,Laptm5,Col1a2,Cyp2e1,C1qb,RGD1564614,Fabp3,Ldha,Sparc,Spink3,Rbp1,Nox4,Evl,Hyal3,B2m,Sord,Irf7,Anxa1,Acta1,Ucp2,Vim,Cd74,Coro1a,Tgfb1,Slc4a1,Hpn,Dync1li2,Cdc42,Lrat,Fcer1g,Eef2,Ifitm1,Maob,Sts,Pam,Hp,Arhgdia,Fbn1,Col4a1,Ahsg,Hnrnph1,Prlr,Mfge8…	78	3512	0.46	1.76e-15
GO:0010035	Response to inorganic substance	Alas2,Cdk1,Rplp0,Bdh1,Sec31a,Alb,Prdx2,Sod3,Cst3,Mgp,Ncstn,Fabp1,Cat,Serpina1,Fkbp1a,Acadm,Cyp2e1,C1qa,Ldha,Sparc,Pgam2,Sepw1,B2m,Sord,Anxa1,Acta1,Ucp2,Vim,Slc4a1,Eef2,Maob,Pam,Hp,C3	34	775	0.75	2.92e-12
GO:1901700	Response to oxygen-containing compound	Alas2,Cdk1,Aif1,Rplp0,Bdh1,Ugt2b1,Cd38,Gc,Apoa2,Prdx2,Col3a1,Col5a2,Sod3,Tfpi,Cst3,Ncstn,Fabp1,Mgst1,Oxr1,Cat,Igfbp3,Cyp4a8,Serpina1,Dpysl2,Col1a2,Cyp2e1,Fabp3,Ldha,Sparc,Spink3,Nox4,B2m,Anxa1,Ucp2,Vim,Tpm1,Tgfb1,Slc4a1,Cdc42,Lrat,Eef2,Maob,Sts,Pam,Hp,Fbn1,Col4a1,Ahsg,Hnrnph1,Mest,Glul,C3,ENSRNOP00000067246,Slpi	54	2048	0.53	2.92e-12
GO:0009605	Response to external stimulus	Psmb9,Fabp7,Aif1,Bdh1,Ugt2b1,Alb,Gc,Prdx2,Col3a1,Tfpi,Cst3,Mgp,Lyz2,Mgst1,Vamp7,Cat,Igfbp3,Serpina1,Dpysl2,Acadm,Cyp2e1,C1qb,C1qc,RGD1564614,C1qa,Ldha,Sparc,Spink3,Rbp1,Evl,Ak3,Hyal3,B2m,Sord,Irf7,Anxa1,Acta1,Ucp2,Vim,Ap3d1,Ltbr,Coro1a,Tgfb1,Slc4a1,Hpn,Cdc42,Lrat,Fcer1g,Eef2,Ifitm1,Maob,ENSRNOP00000047118,Hp,Arhgdia,Prlr,Anxa3,Arf1,Lox,Dpyd,Glul,C3,Slpi	62	2753	0.46	8.33e-12
GO:0009719	Response to endogenous stimulus	Aif1,Rplp0,Bdh1,Ugt2b1,Cd38,Gc,Apoa2,Col3a1,Col5a2,Tfpi,Mgp,Ncstn,Cat,Igfbp3,Acadm,Col1a2,C1qb,Fabp3,Ldha,Sparc,Spink3,Nox4,Sord,Anxa1,Acta1,Ucp2,Vim,Coro1a,Tgfb1,Hpn,Dync1li2,Fcer1g,Eef2,Maob,Sts,Pam,Hp,Fbn1,Col4a1,Ahsg,Hnrnph1,Prlr,Mfge8,Anxa3,Ddc,Lox,C3,ENSRNOP00000067246	48	1761	0.55	2.99e-11
GO:0014070	Response to organic cyclic compound	Alas2,Psmb9,Cdk1,Aif1,Rplp0,Bdh1,Ugt2b1,Cd38,Gc,Apoa2,Tfpi,Cst3,Mgp,Ncstn,Cat,Igfbp3,Cyp4a8,Serpina1,Fkbp1a,Dpysl2,Acadm,Col1a2,C1qb,Ldha,Sparc,Nox4,Anxa1,Acta1,Vim,Tgfb1,Eef2,Maob,Sts,Pam,Hp,Arhgdia,Anxa3,Lox,Dpyd,C3	40	1313	0.6	1.92e-10
GO:0042493	Response to drug	Alas2,Psmb9,Cdk1,Bdh1,Ugt2b15,Cd38,Apoa2,Cst3,Nnmt,Mgst1,Cat,Igfbp3,Dpysl2,Acadm,Cyp2e1,Fabp3,Ldha,B2m,Sord,Anxa1,Tgfb1,Eef2,Maob,Pam,Hp,Ddc,Lox,Dpyd	28	616	0.77	1.92e-10
GO:0042221	Response to chemical	Alas2,Psmb9,Cdk1,Aif1,Rplp0,Bdh1,Ugt2b15,Ugt2b1,Sec31a,Alb,Cd38,Gc,Apoa2,Prdx2,Col3a1,Col5a2,Sod3,Rtn4,Tfpi,Cst3,Mgp,Nnmt,Ncstn,Fabp1,Mgst1,Oxr1,Cat,Igfbp3,Cyp4a8,Serpina1,Fkbp1a,Dpysl2,Acadm,Laptm5,Inmt,Col1a2,Cyp2e1,C1qb,RGD1564614,Fabp3,C1qa,Ldha,Sparc,Spink3,Pgam2,Sepw1,Rbp1,Nox4,Evl,Hyal3,B2m,Sord,Irf7,Anxa1,Acta1,Ucp2,Vim,Tpm1,Cd74,Coro1a,Tgfb1,Slc4a1,Hpn,Dync1li2,Cdc42,Lrat,Fcer1g,Eef2,Ifi…	90	5773	0.3	4.22e-10
GO:0048731	System development	Alas2,Psmb9,Cdk1,Fabp7,Aif1,Rplp0,Bdh1,Cd38,Gc,Apoa2,Prdx2,Col3a1,Col5a2,Rtn4,Cst3,Mgp,Nnmt,Ncstn,Adrm1,Mgst1,Vamp7,Cat,Csrp1,Cyp4a8,Fkbp1a,Dpysl2,Acadm,Cel,Col1a2,C1qb,RGD1564614,C1qa,Ldha,Sparc,Nox4,Evl,Slc4a2,Mcfd2,Ak3,Epn1,Hyal3,Rgs14,Cdh17,Ninj1,B2m,Plg,Anxa1,Acta1,Ucp2,Vim,Tpm1,Cd74,Apoa1bp,Ltbr,Coro1a,Ptprf,Tgfb1,Slc4a1,Hpn,Cdc42,Fcer1g,Gamt,Lsr,Eef2,Ptbp1,Sts,Vtn,Pam,Hp,Fbn1,Col4a1,Ahsg,P…	82	5030	0.32	1.03e-09
GO:0032502	Developmental process	Alas2,Psmb8,Psmb9,Cdk1,Fabp7,Aif1,Rplp0,Bdh1,Cd38,Gc,Apoa2,Prdx2,Col3a1,Col5a2,Rtn4,Fbln5,Cst3,Mgp,Nnmt,Ncstn,Aurkb,Adrm1,Mgst1,Vamp7,Tagln2,Cat,Igfbp3,Csrp1,Cyp4a8,Fkbp1a,Dpysl2,Acadm,Cel,Furin,Col1a2,C1qb,RGD1564614,Fabp3,C1qa,Ldha,Sparc,Rnf111,Spink3,Pgam2,Nox4,Evl,Slc4a2,Mcfd2,Ak3,Epn1,Hyal3,Rgs14,Cdh17,Ninj1,B2m,Plg,Anxa1,Acta1,Ucp2,Vim,Tpm1,Cd74,Bcap31,Ap3d1,Apoa1bp,Ltbr,Coro1a,Ptprf,Tgfb1,…	96	6549	0.28	1.16e-09
GO:0009725	Response to hormone	Aif1,Bdh1,Ugt2b1,Cd38,Gc,Apoa2,Tfpi,Mgp,Cat,Igfbp3,Acadm,Col1a2,C1qb,Fabp3,Ldha,Sparc,Spink3,Sord,Anxa1,Acta1,Ucp2,Tgfb1,Hpn,Maob,Sts,Pam,Hp,Fbn1,Ahsg,Prlr,Mfge8,Anxa3,Lox,C3,ENSRNOP00000067246	35	1105	0.61	1.8e-09
GO:0048513	Animal organ development	Alas2,Psmb9,Cdk1,Fabp7,Aif1,Rplp0,Bdh1,Gc,Apoa2,Prdx2,Col3a1,Col5a2,Rtn4,Cst3,Mgp,Nnmt,Ncstn,Adrm1,Mgst1,Cat,Cyp4a8,Fkbp1a,Dpysl2,Acadm,Col1a2,C1qb,RGD1564614,Ldha,Sparc,Nox4,Mcfd2,Ak3,Epn1,Hyal3,Cdh17,Ninj1,B2m,Plg,Anxa1,Acta1,Ucp2,Vim,Tpm1,Cd74,Ltbr,Coro1a,Tgfb1,Slc4a1,Hpn,Cdc42,Fcer1g,Gamt,Lsr,Eef2,Ptbp1,Sts,Vtn,Pam,Hp,Fbn1,Col4a1,Ahsg,Prlr,Anxa3,Lox,Sri,Ctsz,C3	68	3758	0.37	2.47e-09
GO:0006950	Response to stress	Alas2,Cdk1,Aif1,Bdh1,Alb,Cd38,Apoa2,Prdx2,Col3a1,Pttg1,Sod3,Rtn4,Tfpi,Cst3,Lyz2,Fabp1,Mgst1,Oxr1,Vamp7,Cat,Igfbp3,Serpina1,Acadm,Shfm1,Cyp2e1,C1qb,C1qc,RGD1564614,C1qa,Ldha,Sparc,Rnf111,Nox4,Evl,Ak3,Hyal3,Rgs14,Ckm,B2m,Sord,Plg,Irf7,Anxa1,Ucp2,Vim,Tpm1,Cd74,Coro1a,Ptprf,Tgfb1,Slc4a1,Cdc42,Fcer1g,Eef2,Ifitm1,Pam,Hp,Cdc37,Ahsg,Tm9sf4,Anxa3,Ube2n,Lox,Glul,C3,ENSRNOP00000067246,Slpi	67	3683	0.37	2.87e-09
GO:0010243	Response to organonitrogen compound	Psmb9,Cdk1,Aif1,Rplp0,Bdh1,Ugt2b1,Col3a1,Col5a2,Nnmt,Ncstn,Mgst1,Cat,Igfbp3,Fkbp1a,Dpysl2,Col1a2,Cyp2e1,Fabp3,Ldha,Sparc,Spink3,Nox4,Anxa1,Acta1,Ucp2,Vim,Tgfb1,Fcer1g,Eef2,Sts,Hp,Fbn1,Col4a1,Ahsg,Hnrnph1,Ddc,ENSRNOP00000067246	37	1313	0.56	8.46e-09
GO:0007275	Multicellular organism development	Alas2,Psmb9,Cdk1,Fabp7,Aif1,Rplp0,Bdh1,Cd38,Gc,Apoa2,Prdx2,Col3a1,Col5a2,Rtn4,Cst3,Mgp,Nnmt,Ncstn,Aurkb,Adrm1,Mgst1,Vamp7,Cat,Csrp1,Cyp4a8,Fkbp1a,Dpysl2,Acadm,Cel,Furin,Col1a2,C1qb,RGD1564614,C1qa,Ldha,Sparc,Rnf111,Nox4,Evl,Slc4a2,Mcfd2,Ak3,Epn1,Hyal3,Rgs14,Cdh17,Ninj1,B2m,Plg,Anxa1,Acta1,Ucp2,Vim,Tpm1,Cd74,Apoa1bp,Ltbr,Coro1a,Ptprf,Tgfb1,Slc4a1,Hpn,Cdc42,Fcer1g,Gamt,Lsr,Eef2,Ptbp1,Sts,Vtn,Pam,Hp…	86	5716	0.29	1.03e-08
GO:0010038	Response to metal ion	Alas2,Cdk1,Bdh1,Sec31a,Alb,Sod3,Mgp,Ncstn,Cat,Serpina1,Fkbp1a,Acadm,C1qa,Sparc,Pgam2,B2m,Sord,Acta1,Vim,Maob,Pam,Hp,C3	23	516	0.76	2.24e-08
GO:0048856	Anatomical structure development	Alas2,Psmb9,Cdk1,Fabp7,Aif1,Rplp0,Bdh1,Cd38,Gc,Apoa2,Prdx2,Col3a1,Col5a2,Rtn4,Cst3,Mgp,Nnmt,Ncstn,Aurkb,Adrm1,Mgst1,Vamp7,Tagln2,Cat,Csrp1,Cyp4a8,Fkbp1a,Dpysl2,Acadm,Cel,Furin,Col1a2,C1qb,RGD1564614,C1qa,Ldha,Sparc,Rnf111,Spink3,Nox4,Evl,Slc4a2,Mcfd2,Ak3,Epn1,Hyal3,Rgs14,Cdh17,Ninj1,B2m,Plg,Anxa1,Acta1,Ucp2,Vim,Tpm1,Cd74,Apoa1bp,Ltbr,Coro1a,Ptprf,Tgfb1,Slc4a1,Hpn,Cdc42,Fcer1g,Gamt,Lsr,Eef2,Ptbp1,…	88	6089	0.27	4.02e-08
GO:0009991	Response to extracellular stimulus	Aif1,Bdh1,Alb,Gc,Cst3,Mgp,Cat,Igfbp3,Acadm,RGD1564614,Ldha,Sparc,Spink3,Rbp1,Ak3,Sord,Acta1,Ucp2,Vim,Tgfb1,Slc4a1,Lrat,Eef2,Hp,Dpyd,Glul	26	729	0.66	9.84e-08
GO:0044419	Interspecies interaction between organisms	Psmb9,Aif1,Ugt2b1,Prdx2,Tfpi,Lyz2,Mgst1,Vamp7,Igfbp3,Serpina1,Furin,Cyp2e1,C1qb,C1qc,RGD1564614,C1qa,Sparc,Evl,Hyal3,B2m,Plg,Irf7,Anxa1,Vim,Coro1a,Tgfb1,Hpn,Cdc42,Lrat,Fcer1g,Ifitm1,Ptbp1,Maob,Hp,Prlr,Anxa3,Arf1,C3,Slpi	39	1700	0.47	5.42e-07
GO:0009628	Response to abiotic stimulus	Alas2,Psmb9,Aif1,Cd38,Col3a1,Sod3,Rtn4,Cst3,Mgp,Aurkb,Fabp1,Cat,Igfbp3,Serpina1,Acadm,Ldha,Sparc,Nox4,Hyal3,Rgs14,Ckm,Sord,Anxa1,Acta1,Ucp2,Vim,Ltbr,Tgfb1,Slc4a1,Hpn,Sts,Pam,Hp,Arhgdia,Tm9sf4	35	1428	0.5	8.2e-07
GO:0031667	Response to nutrient levels	Bdh1,Alb,Gc,Cst3,Mgp,Cat,Igfbp3,Acadm,RGD1564614,Ldha,Sparc,Spink3,Rbp1,Ak3,Sord,Ucp2,Vim,Tgfb1,Slc4a1,Lrat,Eef2,Hp,Dpyd,Glul	24	693	0.65	8.2e-07
GO:0048545	Response to steroid hormone	Aif1,Bdh1,Ugt2b1,Cd38,Gc,Apoa2,Tfpi,Mgp,Acadm,C1qb,Sparc,Anxa1,Acta1,Tgfb1,Maob,Pam,Hp,Anxa3,Lox,C3	20	476	0.74	8.65e-07
GO:0070887	Cellular response to chemical stimulus	Psmb9,Cdk1,Aif1,Rplp0,Ugt2b1,Prdx2,Col3a1,Col5a2,Sod3,Rtn4,Tfpi,Cst3,Ncstn,Fabp1,Mgst1,Oxr1,Cat,Igfbp3,Fkbp1a,Laptm5,Col1a2,Cyp2e1,Sparc,Spink3,Sepw1,Nox4,Evl,Hyal3,B2m,Irf7,Anxa1,Acta1,Ucp2,Vim,Tpm1,Cd74,Coro1a,Tgfb1,Dync1li2,Cdc42,Lrat,Fcer1g,Eef2,Ifitm1,Hp,Arhgdia,Fbn1,Col4a1,Ahsg,Hnrnph1,Prlr,Ddc,Lox	53	3000	0.36	2.22e-06
GO:0051707	Response to other organism	Psmb9,Aif1,Ugt2b1,Prdx2,Tfpi,Lyz2,Mgst1,Vamp7,Igfbp3,Serpina1,Cyp2e1,C1qb,C1qc,RGD1564614,C1qa,Sparc,Evl,Hyal3,B2m,Irf7,Anxa1,Vim,Coro1a,Tgfb1,Cdc42,Lrat,Fcer1g,Ifitm1,Maob,Hp,Prlr,Anxa3,Arf1,C3,Slpi	35	1493	0.48	2.25e-06
GO:0031099	Regeneration	Alas2,Cdk1,Apoa2,Nnmt,Ninj1,Plg,Anxa1,Ucp2,Vim,Ptprf,Tgfb1,Vtn,Hp,Ahsg,Anxa3	15	274	0.85	3.26e-06
GO:0048518	Positive regulation of biological process	Pcbd1,Cdk1,Iscu,Aif1,Alb,Cd38,Apoa2,Prdx2,Col3a1,Rtn4,Fbln5,Cst3,Ncstn,Aurkb,Fabp1,Adrm1,Vamp7,Cat,Igfbp3,Fkbp1a,Hsd17b12,Dpysl2,Furin,C1qb,C1qc,RGD1564614,Fabp3,C1qa,Ldha,Sparc,Rnf111,Spink3,Nox4,Tomm22,Evl,Epn1,Hyal3,Rgs14,Cdh17,Ninj1,Ube2s,B2m,Plg,Irf7,Anxa1,Acta1,Ucp2,Cd53,Cd99l2,Vim,Tpm1,Cd74,Bcap31,Ap3d1,Ltbr,Coro1a,Ptprf,Tgfb1,Slc4a1,Hpn,Cdc42,Lrat,Fcer1g,Tspan31,Eef2,Ptbp1,Maob,Sts,Sumo2,…	89	6791	0.23	3.51e-06
GO:0051384	Response to glucocorticoid	Aif1,Bdh1,Ugt2b1,Apoa2,Mgp,Acadm,C1qb,Sparc,Anxa1,Tgfb1,Maob,Pam,Hp,Anxa3,C3	15	279	0.84	3.72e-06
GO:0065008	Regulation of biological quality	Alas2,Iscu,Rplp0,Alb,Cd38,Gc,Apoa2,Prdx2,Rtn4,Tfpi,Ncstn,Aurkb,Vamp7,Igfbp3,Fkbp1a,Hsd17b12,Dpysl2,Cel,Furin,Col1a2,RGD1564614,Fabp3,Sparc,Spink3,Rbp1,Nox4,Evl,Slc4a2,Rgs14,Ttr,Ube2s,B2m,Plg,Anxa1,Ucp2,Vim,Tpm1,Cd74,Bcap31,Ap3d1,Coro1a,Ptprf,Tgfb1,Slc4a1,Hpn,Cdc42,Lrat,Fcer1g,Lsr,Ptbp1,Maob,Pam,Cdc37,Arhgdia,Fbn1,Ahsg,Prlr,Afm,Kcnn2,Eif4g2,Tm9sf4,Arf1,Lox,Mest,Glul,Sri,C3,ENSRNOP00000067246	68	4532	0.29	3.79e-06
GO:0032355	Response to estradiol	Bdh1,Cd38,Gc,Tfpi,Cst3,Cat,Igfbp3,Serpina1,Anxa1,Vim,Tgfb1,Eef2,Pam,C3	14	238	0.88	3.81e-06
GO:0006979	Response to oxidative stress	Cdk1,Aif1,Cd38,Prdx2,Sod3,Cst3,Fabp1,Mgst1,Oxr1,Cat,Cyp2e1,Ldha,Rgs14,Anxa1,Ucp2,Tpm1,Slc4a1,Eef2,Hp	19	484	0.71	4.66e-06
GO:0032501	Multicellular organismal process	Alas2,Psmb9,Cdk1,Fabp7,Aif1,Rplp0,Bdh1,Alb,Cd38,Gc,Apoa2,Prdx2,Col3a1,Col5a2,Rtn4,Tfpi,Fbln5,Cst3,Mgp,Nnmt,Ncstn,Aurkb,Fabp1,Adrm1,Mgst1,Oxr1,Vamp7,Cat,Igfbp3,Csrp1,Cyp4a8,Fkbp1a,Dpysl2,Acadm,Cel,Furin,Col1a2,C1qb,RGD1564614,C1qa,Ldha,Sparc,Rnf111,Spink3,Pgam2,Nox4,Evl,Slc4a2,Mcfd2,Ak3,Epn1,Hyal3,Rgs14,Cdh17,Ninj1,B2m,Plg,Irf7,Anxa1,Acta1,Ucp2,Vim,Tpm1,Scamp4,Cd74,Bcap31,Ap3d1,Apoa1bp,Ltbr,Coro1a…	103	8527	0.19	4.99e-06
GO:0051239	Regulation of multicellular organismal process	Cdk1,Aif1,Alb,Cd38,Apoa2,Prdx2,Col3a1,Col5a2,Rtn4,Tfpi,Fbln5,Cst3,Mgp,Adrm1,Vamp7,Dpysl2,Furin,C1qc,Sparc,Spink3,Rbp1,Evl,Epn1,Hyal3,Rgs14,B2m,Plg,Irf7,Anxa1,Ucp2,Vim,Tpm1,Cd74,Ap3d1,Apoa1bp,Ptprf,Tgfb1,Hpn,Cdc42,Fcer1g,Gamt,Ptbp1,ENSRNOP00000047118,Fbn1,Ahsg,Prlr,Kcnn2,Eif4g2,Anxa3,Arf1,Lox,Glul,Sri,Ctsz,C3,ENSRNOP00000067246,Tnni2	57	3488	0.33	5.34e-06
GO:0032879	Regulation of localization	Cdk1,Iscu,Aif1,Cd38,Apoa2,Col3a1,Rtn4,Aurkb,Vamp7,Igfbp3,Fkbp1a,Dpysl2,Furin,Fabp3,Sparc,Spink3,Nox4,Evl,Hyal3,B2m,Plg,Anxa1,Ucp2,Cd99l2,Vim,Tpm1,Cd74,Bcap31,Ap3d1,Apoa1bp,Coro1a,Tgfb1,Cdc42,Lrat,Fcer1g,Ptbp1,Maob,Vtn,Pam,ENSRNOP00000047118,Arhgdia,Ahsg,Mfge8,Kcnn2,Tm9sf4,Anxa3,Arf1,Mest,Glul,Sri,C3,ENSRNOP00000067246	52	3105	0.34	1.3e-05
GO:0000302	Response to reactive oxygen species	Cdk1,Prdx2,Sod3,Cst3,Fabp1,Cat,Cyp2e1,Ldha,Anxa1,Ucp2,Tpm1,Slc4a1,Eef2,Hp	14	272	0.82	1.59e-05
GO:0048522	Positive regulation of cellular process	Pcbd1,Cdk1,Iscu,Aif1,Cd38,Apoa2,Prdx2,Col3a1,Rtn4,Fbln5,Cst3,Ncstn,Aurkb,Fabp1,Adrm1,Vamp7,Cat,Igfbp3,Fkbp1a,Hsd17b12,Dpysl2,Furin,C1qa,Ldha,Sparc,Rnf111,Spink3,Nox4,Tomm22,Evl,Epn1,Hyal3,Rgs14,Cdh17,Ninj1,Ube2s,B2m,Plg,Irf7,Anxa1,Ucp2,Cd53,Cd99l2,Vim,Tpm1,Cd74,Bcap31,Ap3d1,Ltbr,Coro1a,Ptprf,Tgfb1,Slc4a1,Hpn,Cdc42,Fcer1g,Tspan31,Eef2,Ptbp1,Maob,Sts,Sumo2,Vtn,ENSRNOP00000047118,Hp,Cdc37,Fbn1,Ahsg,…	82	6252	0.23	1.79e-05
GO:0007584	Response to nutrient	Bdh1,Alb,Mgp,Cat,Acadm,Ldha,Sparc,Rbp1,Vim,Tgfb1,Lrat,Eef2,Hp,Dpyd	14	292	0.79	3.49e-05
GO:0051179	Localization	Slc26a1,Alas2,Cdk1,Aif1,Rplp0,Sec31a,Alb,Gc,Apoa2,Sptssa,Tcn2,Rtn4,Fbln5,Aurkb,Fabp1,Vamp7,Sec24c,Fkbp1a,Dpysl2,Rabgap1,Shfm1,Cel,Furin,Tmem150a,RGD1564614,Fabp3,Clec4f,Vdac2,Tomm22,Slc4a2,Mcfd2,Epn1,Rgs14,Cdh17,Ttr,B2m,Sord,Plg,Anxa1,Ucp2,Cd99l2,Scamp4,Cd74,Bcap31,Ap3d1,Apoa1bp,Coro1a,Cox6a2,Ptprf,Tgfb1,Slc4a1,Hpn,Dync1li2,Cdc42,Fcer1g,Sys1,Lsr,Sumo2,Vtn,Pam,ENSRNOP00000047118,Fbn1,Prlr,Afm,Mfge…	74	5492	0.24	4.43e-05
GO:0001666	Response to hypoxia	Alas2,Cd38,Sod3,Rtn4,Cst3,Fabp1,Cat,Igfbp3,Serpina1,Ldha,Nox4,Ucp2,Tgfb1,Pam,Hp,Tm9sf4	16	407	0.71	5.46e-05
GO:0007568	Aging	Cdk1,Rtn4,Aurkb,Cat,Igfbp3,Furin,C1qb,RGD1564614,C1qa,Nox4,B2m,Ucp2,Vim,Tgfb1,Eef2,Hp,Ddc	17	463	0.68	5.53e-05
GO:0034097	Response to cytokine	Psmb9,Aif1,Rplp0,Cd38,Col3a1,Tfpi,Serpina1,Fkbp1a,Laptm5,RGD1564614,Sparc,Evl,Hyal3,Irf7,Anxa1,Vim,Cd74,Coro1a,Cdc42,Lrat,Fcer1g,Ifitm1,Hnrnph1,Prlr,Lox	25	986	0.52	6.93e-05
GO:0050790	Regulation of catalytic activity	Psmb8,Psmb9,Iscu,Apoa2,Prdx2,Pttg1,Tfpi,Cst3,Ncstn,Aurkb,Fabp1,Adrm1,Igfbp3,Serpina1,Fkbp1a,Rabgap1,Furin,Spink3,Nox4,Rgs14,Ube2s,Anxa1,Tpm1,Cd74,Bcap31,Cox6a2,Tgfb1,Slc4a1,Hpn,Cdc42,Vtn,Hp,Cdc37,Arhgdia,Fbn1,Ahsg,Prlr,Arhgef1,Anxa3,Arf1,Ube2n,C3,Slpi	43	2518	0.34	0.00014
GO:0006952	Defense response	Aif1,Apoa2,Prdx2,Rtn4,Cst3,Lyz2,Vamp7,Serpina1,C1qb,C1qc,RGD1564614,C1qa,Nox4,Evl,Hyal3,B2m,Irf7,Anxa1,Vim,Cd74,Coro1a,Tgfb1,Cdc42,Fcer1g,Ifitm1,Hp,Ahsg,Anxa3,C3,Slpi	30	1429	0.43	0.00018
GO:0009636	Response to toxic substance	Cdk1,Bdh1,Prdx2,Sod3,Cst3,Fabp1,Mgst1,Cat,Inmt,Sepw1,Maob,Hp,Ddc	13	290	0.76	0.00018
GO:0051050	Positive regulation of transport	Cdk1,Cd38,Apoa2,Rtn4,Vamp7,Dpysl2,Fabp3,Spink3,Hyal3,B2m,Anxa1,Bcap31,Tgfb1,Cdc42,Lrat,Fcer1g,Ptbp1,Vtn,Ahsg,Mfge8,Tm9sf4,Arf1,Glul,Sri,C3,ENSRNOP00000067246	26	1122	0.48	0.00018
GO:0002376	Immune system process	Alas2,Psmb8,Psmb9,Aif1,Cd38,Prdx2,Rtn4,Ncstn,Adrm1,Vamp7,Sec24c,Fkbp1a,C1qb,C1qc,RGD1564614,C1qa,Clec4f,Evl,Cdh17,B2m,Plg,Irf7,Anxa1,Cd99l2,Vim,Cd74,Ap3d1,Ltbr,Coro1a,Tgfb1,Slc4a1,Cdc42,Fcer1g,Eef2,Ifitm1,Vtn,ENSRNOP00000047118,Hp,Anxa3,Ube2n,C3,Slpi	42	2465	0.34	0.00019
GO:0097435	Supramolecular fiber organization	Aif1,Col3a1,Col5a2,Fbln5,Cst3,Csrp1,Fkbp1a,Col1a2,Evl,B2m,Acta1,Vim,Tpm1,Coro1a,Cdc42,Arf1,Lox	17	515	0.63	0.00019
GO:0071310	Cellular response to organic substance	Psmb9,Aif1,Rplp0,Ugt2b1,Col3a1,Col5a2,Tfpi,Ncstn,Cat,Igfbp3,Fkbp1a,Laptm5,Col1a2,Sparc,Spink3,Nox4,Evl,Hyal3,B2m,Irf7,Anxa1,Acta1,Ucp2,Vim,Cd74,Coro1a,Tgfb1,Dync1li2,Cdc42,Lrat,Fcer1g,Eef2,Ifitm1,Arhgdia,Fbn1,Col4a1,Ahsg,Hnrnph1,Prlr,Ddc,Lox	41	2385	0.35	0.00021
GO:1901701	Cellular response to oxygen-containing compound	Cdk1,Aif1,Rplp0,Ugt2b1,Prdx2,Col3a1,Col5a2,Sod3,Tfpi,Cst3,Ncstn,Fabp1,Mgst1,Oxr1,Igfbp3,Col1a2,Spink3,Nox4,B2m,Anxa1,Ucp2,Vim,Tpm1,Tgfb1,Fbn1,Col4a1,Ahsg,Hnrnph1	28	1291	0.45	0.00022
GO:0031100	Animal organ regeneration	Alas2,Cdk1,Apoa2,Nnmt,Ucp2,Tgfb1,Vtn,Hp,Ahsg,Anxa3	10	165	0.89	0.00024
GO:0050878	Regulation of body fluid levels	Alas2,Rplp0,Gc,Prdx2,Tfpi,Cel,RGD1564614,Spink3,Plg,Slc4a1,Fcer1g,Lsr,Pam,Prlr,C3	15	409	0.68	0.00024
GO:0044281	Small molecule metabolic process	Pcbd1,Ugt2b1,Gc,Apoa2,Cat,Eci1,Cyp4a8,Hsd17b12,Acadm,Cel,Cyp2e1,Fabp3,Ldha,Pgam2,Rbp1,Nox4,Mcfd2,Ak3,Hyal3,Ttr,Sord,Akr7a2,Cd74,Apoa1bp,Tgfb1,Hibch,Lrat,Gamt,Pam,Fbn1,Ddc,Dpyd,Glul,C3	34	1796	0.39	0.00025
GO:0051241	Negative regulation of multicellular organismal process	Cd38,Apoa2,Prdx2,Col3a1,Col5a2,Rtn4,Tfpi,Fbln5,Cst3,Furin,C1qc,Sparc,Evl,Epn1,Hyal3,B2m,Plg,Anxa1,Vim,Cd74,Apoa1bp,Tgfb1,Hpn,Ptbp1,Fbn1,Ahsg,Sri,Ctsz,ENSRNOP00000067246	29	1386	0.43	0.00026
GO:0050793	Regulation of developmental process	Cdk1,Cd38,Prdx2,Col3a1,Col5a2,Rtn4,Fbln5,Cst3,Mgp,Adrm1,Vamp7,Igfbp3,Dpysl2,C1qc,Sparc,Rbp1,Epn1,Hyal3,Rgs14,B2m,Anxa1,Cd53,Vim,Tpm1,Cd74,Ap3d1,Apoa1bp,Coro1a,Ptprf,Tgfb1,Hpn,Cdc42,Gamt,Ptbp1,ENSRNOP00000047118,Arhgdia,Fbn1,Ahsg,Prlr,Eif4g2,Anxa3,Arf1,Lox,Glul,Ctsz,C3	46	2912	0.31	0.00034
GO:2000026	Regulation of multicellular organismal development	Cdk1,Cd38,Prdx2,Col3a1,Col5a2,Rtn4,Fbln5,Mgp,Adrm1,Vamp7,Dpysl2,C1qc,Sparc,Rbp1,Epn1,Hyal3,Rgs14,B2m,Anxa1,Vim,Cd74,Ap3d1,Apoa1bp,Ptprf,Tgfb1,Hpn,Cdc42,Ptbp1,ENSRNOP00000047118,Fbn1,Ahsg,Prlr,Eif4g2,Anxa3,Arf1,Lox,Glul,Ctsz,C3	39	2319	0.34	0.00061
GO:0006810	Transport	Slc26a1,Alas2,Aif1,Rplp0,Sec31a,Gc,Apoa2,Tcn2,Fbln5,Fabp1,Vamp7,Sec24c,Fkbp1a,Dpysl2,Rabgap1,Shfm1,Cel,Furin,Fabp3,Clec4f,Vdac2,Tomm22,Slc4a2,Mcfd2,Epn1,Rgs14,Cdh17,Ttr,B2m,Anxa1,Ucp2,Scamp4,Cd74,Bcap31,Ap3d1,Coro1a,Cox6a2,Tgfb1,Slc4a1,Hpn,Cdc42,Fcer1g,Sys1,Vtn,Pam,ENSRNOP00000047118,Prlr,Afm,Mfge8,Kcnn2,Tm9sf4,Anxa3,Syngr2,Ddc,Arf1,Sri,ENSRNOP00000067246	57	4083	0.26	0.00062
GO:0019752	Carboxylic acid metabolic process	Pcbd1,Ugt2b1,Eci1,Cyp4a8,Hsd17b12,Acadm,Cyp2e1,Fabp3,Ldha,Pgam2,Rbp1,Nox4,Mcfd2,Hyal3,Cd74,Tgfb1,Hibch,Gamt,Pam,Ddc,Dpyd,Glul,C3	23	985	0.48	0.00062
GO:0051049	Regulation of transport	Cdk1,Iscu,Cd38,Apoa2,Rtn4,Vamp7,Igfbp3,Fkbp1a,Dpysl2,Fabp3,Spink3,Hyal3,B2m,Anxa1,Ucp2,Cd74,Bcap31,Apoa1bp,Coro1a,Tgfb1,Cdc42,Lrat,Fcer1g,Ptbp1,Maob,Vtn,Pam,Ahsg,Mfge8,Kcnn2,Tm9sf4,Arf1,Glul,Sri,C3,ENSRNOP00000067246	36	2063	0.35	0.00068
GO:0072359	Circulatory system development	Cdk1,Col3a1,Rtn4,Fkbp1a,Acadm,Col1a2,RGD1564614,Sparc,Nox4,Plg,Tpm1,Apoa1bp,Tgfb1,Cdc42,Ptbp1,Pam,Fbn1,Col4a1,Mfge8,Lox,Glul,Sri,C3	23	993	0.48	0.00068
GO:0009617	Response to bacterium	Psmb9,Ugt2b1,Prdx2,Tfpi,Lyz2,Mgst1,Igfbp3,Serpina1,Cyp2e1,Sparc,B2m,Vim,Tgfb1,Lrat,Fcer1g,Maob,Hp,Prlr,Anxa3,C3,Slpi	21	871	0.49	0.00098
GO:0055114	Oxidation-reduction process	Pcbd1,Cyp3a62,Bdh1,Apoa2,Prdx2,Sod3,Mgst1,Oxr1,Cat,Eci1,Cyp4a8,Hsd17b12,Acadm,Cyp2e1,Fabp3,Ldha,Nox4,Sh3bgrl3,Sord,Akr7a2,Cox6a2,Maob,Pam,Lox,Dpyd	25	1177	0.44	0.001
GO:0001775	Cell activation	Aif1,Prdx2,Cst3,Ncstn,Vamp7,Fkbp1a,RGD1564614,C1qa,Clec4f,Cdh17,B2m,Anxa1,Cd74,Ltbr,Coro1a,Tgfb1,Fcer1g,Anxa3	18	670	0.54	0.0011
GO:0044706	Multi-multicellular organism process	Alas2,Cd38,Gc,Cst3,Igfbp3,Epn1,Hyal3,Ucp2,Vim,Tgfb1,Sts,Pam	12	303	0.71	0.0011
GO:0061024	Membrane organization	Aif1,Sec31a,Apoa2,Rtn4,Aurkb,Vamp7,Sec24c,Cel,Tomm22,Epn1,Ap3d1,Apoa1bp,Slc4a1,Cdc42,Fcer1g,Reep3,Mfge8,Syngr2,Arf1	19	746	0.52	0.0013
GO:0030198	Extracellular matrix organization	Col3a1,Col5a2,Fbln5,Hsd17b12,Col1a2,Plg,Tgfb1,Hpn,Vtn,Col4a1,Lox	11	259	0.74	0.0014
GO:0051240	Positive regulation of multicellular organismal process	Cdk1,Aif1,Alb,Cd38,Apoa2,Prdx2,Rtn4,Vamp7,Furin,Sparc,Spink3,Rgs14,B2m,Plg,Irf7,Anxa1,Ucp2,Vim,Tpm1,Cd74,Ap3d1,Ptprf,Tgfb1,Hpn,Cdc42,Fcer1g,Ptbp1,ENSRNOP00000047118,Ahsg,Prlr,Eif4g2,Anxa3,Arf1,C3,ENSRNOP00000067246	35	2053	0.34	0.0014
GO:0044092	Negative regulation of molecular function	Apoa2,Prdx2,Pttg1,Tfpi,Cst3,Aurkb,Fabp1,Cat,Serpina1,Fkbp1a,Furin,Spink3,Rgs14,B2m,Anxa1,Ptprf,Slc4a1,Hpn,Vtn,Hp,Ahsg,Anxa3,Sri,Ctsz,C3,Slpi	26	1291	0.42	0.0015
GO:0052548	Regulation of endopeptidase activity	Psmb8,Psmb9,Pttg1,Tfpi,Cst3,Fabp1,Adrm1,Serpina1,Furin,Spink3,Bcap31,Vtn,Ahsg,C3,Slpi	15	492	0.6	0.0015
GO:1901652	Response to peptide	Bdh1,Ugt2b1,Cat,Igfbp3,Fabp3,Sparc,Spink3,Anxa1,Ucp2,Vim,Tgfb1,Sts,Hp,Fbn1,Ahsg,Hnrnph1,ENSRNOP00000067246	17	622	0.55	0.0015
GO:0002682	Regulation of immune system process	Aif1,Cd38,Apoa2,Prdx2,Col3a1,Rtn4,Adrm1,Vamp7,Fkbp1a,C1qb,C1qc,RGD1564614,C1qa,Rbp1,B2m,Irf7,Anxa1,Cd99l2,Cd74,Ap3d1,Coro1a,Tgfb1,Slc4a1,Fcer1g,Cdc37,Fbn1,Ube2n,Lox,C3	29	1557	0.38	0.0017
GO:0007565	Female pregnancy	Alas2,Cd38,Gc,Cst3,Igfbp3,Epn1,Ucp2,Vim,Tgfb1,Sts,Pam	11	270	0.72	0.0017
GO:0009743	Response to carbohydrate	Apoa2,Cst3,Cat,Ldha,Sparc,Nox4,Ucp2,Tgfb1,Cdc42,Hp,Glul	11	267	0.73	0.0017
GO:0042542	Response to hydrogen peroxide	Cdk1,Cst3,Fabp1,Cat,Ldha,Anxa1,Slc4a1,Eef2,Hp	9	171	0.83	0.0017
GO:0045321	Leukocyte activation	Aif1,Prdx2,Ncstn,Vamp7,Fkbp1a,C1qa,Clec4f,Cdh17,B2m,Anxa1,Cd74,Ltbr,Coro1a,Tgfb1,Fcer1g,Anxa3	16	566	0.56	0.0017
GO:0010941	Regulation of cell death	Cdk1,Aif1,Alb,Cd38,Prdx2,Cst3,Aurkb,Fabp1,Oxr1,Cat,Igfbp3,C1qa,Ldha,Vdac2,Nox4,Tomm22,Mcfd2,Anxa1,Ucp2,Cd74,Bcap31,Ltbr,Coro1a,Ptprf,Tgfb1,Hpn,Cdc42,Fcer1g,Hp,Prlr,Arhgef1,Lox,Ctsz	33	1915	0.35	0.0018
GO:0022603	Regulation of anatomical structure morphogenesis	Col5a2,Rtn4,Fbln5,Cst3,Vamp7,Dpysl2,Sparc,Epn1,Anxa1,Cd53,Vim,Tpm1,Apoa1bp,Coro1a,Ptprf,Tgfb1,Hpn,Cdc42,ENSRNOP00000047118,Arhgdia,Eif4g2,Anxa3,Glul,C3	24	1166	0.43	0.002
GO:0051346	Negative regulation of hydrolase activity	Apoa2,Pttg1,Tfpi,Cst3,Fabp1,Serpina1,Fkbp1a,Furin,Spink3,Anxa1,Hpn,Vtn,Ahsg,C3,Slpi	15	511	0.58	0.002
GO:0099024	Plasma membrane invagination	Aif1,Aurkb,Vamp7,Cdc42,Fcer1g,Mfge8,Arf1	7	95	0.98	0.002
GO:0010817	Regulation of hormone levels	Cd38,Vamp7,Igfbp3,Hsd17b12,Cel,Furin,Spink3,Rbp1,Ttr,Anxa1,Ucp2,Hpn,Lrat,Ptbp1,Glul,Sri	16	584	0.55	0.0023
GO:0043434	Response to peptide hormone	Bdh1,Ugt2b1,Cat,Igfbp3,Fabp3,Sparc,Spink3,Anxa1,Ucp2,Tgfb1,Sts,Hp,Fbn1,Ahsg,ENSRNOP00000067246	15	519	0.57	0.0023
GO:0071417	Cellular response to organonitrogen compound	Aif1,Rplp0,Ugt2b1,Col3a1,Col5a2,Ncstn,Col1a2,Spink3,Nox4,Acta1,Ucp2,Vim,Tgfb1,Fbn1,Col4a1,Ahsg,Hnrnph1,Ddc	18	730	0.5	0.0025
GO:0002449	Lymphocyte mediated immunity	Vamp7,C1qb,C1qc,C1qa,Irf7,Cd74,Coro1a,Fcer1g,C3	9	192	0.78	0.0034
GO:0033194	Response to hydroperoxide	Aif1,Cd38,Mgst1,Oxr1	4	19	1.44	0.0034
GO:0010951	Negative regulation of endopeptidase activity	Pttg1,Tfpi,Cst3,Fabp1,Serpina1,Furin,Spink3,Vtn,Ahsg,C3,Slpi	11	298	0.68	0.0036
GO:0030334	Regulation of cell migration	Aif1,Col3a1,Rtn4,Igfbp3,Furin,Sparc,Nox4,Evl,Plg,Anxa1,Cd99l2,Vim,Tpm1,Cd74,Coro1a,Tgfb1,Vtn,ENSRNOP00000047118,Arhgdia,Anxa3,Glul	21	982	0.44	0.0038
GO:0019884	Antigen processing and presentation of exogenous antigen	Sec24c,B2m,Cd74,Ap3d1,Fcer1g	5	43	1.18	0.0041
GO:0061061	Muscle structure development	Cdk1,Col3a1,Csrp1,Fkbp1a,Acadm,RGD1564614,Nox4,Ak3,Plg,Acta1,Tpm1,Tgfb1,Eef2,Lox,C3	15	555	0.54	0.0043
GO:0098883	Synapse pruning	C1qb,C1qc,C1qa	3	6	1.81	0.0043
GO:0032496	Response to lipopolysaccharide	Ugt2b1,Prdx2,Tfpi,Mgst1,Igfbp3,Serpina1,Sparc,B2m,Vim,Tgfb1,Maob,Hp,Slpi	13	431	0.59	0.0049
GO:0071345	Cellular response to cytokine stimulus	Psmb9,Aif1,Rplp0,Tfpi,Fkbp1a,Laptm5,Evl,Hyal3,Irf7,Vim,Cd74,Coro1a,Cdc42,Lrat,Fcer1g,Ifitm1,Hnrnph1,Prlr,Lox	19	850	0.46	0.0049
GO:0043393	Regulation of protein binding	Pcbd1,Aurkb,Fkbp1a,B2m,Ptprf,Cdc42,Vtn,Lox,Ctsz,Slpi	10	258	0.7	0.0052
GO:0045087	Innate immune response	Aif1,Vamp7,C1qb,C1qc,RGD1564614,C1qa,Evl,B2m,Irf7,Anxa1,Vim,Coro1a,Tgfb1,Cdc42,Fcer1g,Ifitm1,C3,Slpi	18	779	0.48	0.0052
GO:0048878	Chemical homeostasis	Alas2,Iscu,Cd38,Apoa2,Rtn4,Fkbp1a,Fabp3,Spink3,Rbp1,Nox4,Slc4a2,B2m,Ucp2,Bcap31,Ap3d1,Tgfb1,Slc4a1,Hpn,Lsr,Fbn1,Tm9sf4,Arf1,Sri,ENSRNOP00000067246	24	1255	0.39	0.0052
GO:0098542	Defense response to other organism	Aif1,Lyz2,Vamp7,C1qb,C1qc,RGD1564614,C1qa,Evl,B2m,Irf7,Anxa1,Vim,Coro1a,Tgfb1,Cdc42,Fcer1g,Ifitm1,Hp,Anxa3,C3,Slpi	21	1011	0.43	0.0052
GO:0033273	Response to vitamin	Cat,Sparc,Rbp1,Vim,Tgfb1,Lrat,Eef2,Hp	8	160	0.81	0.0054
GO:0010269	Response to selenium ion	Rplp0,Sepw1,Vim,Maob	4	23	1.35	0.0055
GO:0010288	Response to lead ion	Alas2,Cat,Serpina1,Sparc,Hp	5	47	1.14	0.0055
GO:0051641	Cellular localization	Cdk1,Sec31a,Alb,Rtn4,Fbln5,Aurkb,Vamp7,Sec24c,Fkbp1a,Dpysl2,Rabgap1,Shfm1,Cel,Tmem150a,RGD1564614,Fabp3,Tomm22,Rgs14,Cd74,Bcap31,Ap3d1,Apoa1bp,Coro1a,Tgfb1,Slc4a1,Dync1li2,Cdc42,Fcer1g,Sys1,Sumo2,Kcnn2,Tm9sf4,Anxa3,Syngr2,Ddc,Arf1,ENSRNOP00000067246	37	2434	0.29	0.0055
GO:1903530	Regulation of secretion by cell	Cd38,Rtn4,Vamp7,Igfbp3,Dpysl2,Spink3,Hyal3,Anxa1,Ucp2,Tgfb1,Cdc42,Fcer1g,Ptbp1,Maob,Pam,Arf1,Glul,Sri	18	786	0.47	0.0055
GO:0019882	Antigen processing and presentation	Psmb8,Psmb9,Sec24c,B2m,Cd74,Ap3d1,Fcer1g	7	119	0.88	0.0058
GO:0022414	Reproductive process	Alas2,Cd38,Gc,Pttg1,Cst3,Adrm1,Mgst1,Igfbp3,Spink3,Pgam2,Vdac2,Slc4a2,Epn1,Hyal3,Sord,Plg,Anxa1,Ucp2,Vim,Scamp4,Bcap31,Tgfb1,Gamt,Eif4h,Sts,LOC367746,Pam,Hp,Ahsg,Prlr,Mfge8	31	1882	0.33	0.0058
GO:0046686	Response to cadmium ion	Cdk1,Bdh1,Cat,Sparc,B2m,Sord	6	81	0.98	0.0059
GO:0051336	Regulation of hydrolase activity	Psmb8,Psmb9,Apoa2,Pttg1,Tfpi,Cst3,Fabp1,Adrm1,Igfbp3,Serpina1,Fkbp1a,Rabgap1,Furin,Spink3,Rgs14,Anxa1,Tpm1,Bcap31,Hpn,Vtn,Arhgdia,Ahsg,Arhgef1,C3,Slpi	25	1373	0.37	0.0068
GO:0019725	Cellular homeostasis	Alas2,Iscu,Cd38,Prdx2,Rtn4,Fkbp1a,Spink3,Nox4,Slc4a2,Ube2s,Plg,Ucp2,Bcap31,Tgfb1,Slc4a1,Tm9sf4,Arf1,Lox,Sri,ENSRNOP00000067246	20	968	0.43	0.0073
GO:0050776	Regulation of immune response	Cd38,Apoa2,Col3a1,Rtn4,Vamp7,Fkbp1a,C1qb,C1qc,RGD1564614,C1qa,B2m,Irf7,Anxa1,Cd74,Tgfb1,Fcer1g,Cdc37,Ube2n,C3	19	889	0.44	0.0073
GO:0009611	Response to wounding	Cdk1,Aif1,Col3a1,Tfpi,Cst3,RGD1564614,Sparc,Plg,Tpm1,Tgfb1,Slc4a1,Lox,C3	13	460	0.56	0.0075
GO:0051093	Negative regulation of developmental process	Cd38,Prdx2,Col3a1,Col5a2,Rtn4,Fbln5,Cst3,C1qc,Sparc,Epn1,Hyal3,B2m,Anxa1,Vim,Cd74,Apoa1bp,Tgfb1,Hpn,Ptbp1,Fbn1,Ahsg,Ctsz	22	1133	0.4	0.0075
GO:0034599	Cellular response to oxidative stress	Cdk1,Aif1,Prdx2,Sod3,Cst3,Fabp1,Mgst1,Oxr1,Anxa1,Tpm1	10	279	0.67	0.0079
GO:0051270	Regulation of cellular component movement	Aif1,Col3a1,Rtn4,Igfbp3,Furin,Sparc,Nox4,Evl,Plg,Anxa1,Cd99l2,Vim,Tpm1,Cd74,Coro1a,Tgfb1,Vtn,ENSRNOP00000047118,Arhgdia,Anxa3,Glul,Sri	22	1138	0.4	0.0079
GO:0043067	Regulation of programmed cell death	Cdk1,Aif1,Alb,Cd38,Prdx2,Cst3,Aurkb,Fabp1,Oxr1,Cat,Igfbp3,Ldha,Vdac2,Nox4,Tomm22,Anxa1,Ucp2,Cd74,Bcap31,Ltbr,Coro1a,Ptprf,Tgfb1,Hpn,Cdc42,Fcer1g,Prlr,Lox,Ctsz	29	1748	0.33	0.0082
GO:0043086	Negative regulation of catalytic activity	Apoa2,Pttg1,Tfpi,Cst3,Fabp1,Serpina1,Fkbp1a,Furin,Spink3,Rgs14,Anxa1,Slc4a1,Hpn,Vtn,Hp,Ahsg,Anxa3,C3,Slpi	19	903	0.43	0.0084
GO:0042110	T cell activation	Prdx2,Ncstn,Fkbp1a,Clec4f,B2m,Anxa1,Cd74,Coro1a,Tgfb1,Fcer1g	10	284	0.66	0.0088
GO:0007589	Body fluid secretion	Alas2,Rplp0,Gc,Cel,Pam,Prlr	6	90	0.94	0.009
GO:0007507	Heart development	Cdk1,Col3a1,Rtn4,Fkbp1a,Acadm,Sparc,Nox4,Tpm1,Tgfb1,Cdc42,Ptbp1,Pam,Fbn1,Lox,Sri	15	610	0.5	0.0091
GO:0085029	Extracellular matrix assembly	Fbln5,Col1a2,Tgfb1,Lox	4	28	1.27	0.0092
GO:0097305	Response to alcohol	Cdk1,Rplp0,Bdh1,Ugt2b1,Cat,Serpina1,Cyp2e1,Sparc,Spink3,Tgfb1,Eef2,Maob	12	408	0.58	0.0092
GO:1901615	Organic hydroxy compound metabolic process	Pcbd1,Gc,Apoa2,Cat,Cel,Cyp2e1,Ldha,Rbp1,Ttr,Sord,Akr7a2,Lrat,Ddc	13	477	0.55	0.0099
GO:0009888	Tissue development	Cdk1,Bdh1,Col3a1,Rtn4,Cst3,Mgp,Adrm1,Tagln2,Cat,Csrp1,Fkbp1a,Acadm,Col1a2,RGD1564614,Nox4,Hyal3,Ninj1,Plg,Anxa1,Acta1,Vim,Tpm1,Tgfb1,Hpn,Cdc42,Eef2,Vtn,Col4a1,Prlr,Lox,Ctsz	31	1966	0.31	0.0106
GO:0071447	Cellular response to hydroperoxide	Aif1,Mgst1,Oxr1	3	10	1.59	0.0106
GO:0071495	Cellular response to endogenous stimulus	Aif1,Rplp0,Ugt2b1,Col3a1,Col5a2,Tfpi,Ncstn,Col1a2,Spink3,Nox4,Anxa1,Acta1,Ucp2,Vim,Coro1a,Tgfb1,Dync1li2,Eef2,Fbn1,Col4a1,Ahsg,Hnrnph1,Prlr,Ddc	24	1338	0.37	0.0106
GO:0003012	Muscle system process	Psmb9,Cd38,Fkbp1a,Pgam2,Acta1,Tpm1,Eef2,Kcnn2,ENSRNOP00000067246,Tnni2	10	293	0.64	0.0107
GO:0046688	Response to copper ion	Cdk1,Sod3,Acadm,Sord,Pam	5	58	1.05	0.0107
GO:0050778	Positive regulation of immune response	Cd38,Rtn4,Vamp7,C1qb,C1qc,RGD1564614,C1qa,B2m,Irf7,Anxa1,Cd74,Tgfb1,Fcer1g,Ube2n,C3	15	623	0.49	0.0108
GO:0002718	Regulation of cytokine production involved in immune response	Apoa2,Rtn4,B2m,Cd74,Tgfb1,Fcer1g	6	95	0.91	0.0111
GO:0006629	Lipid metabolic process	Plbd2,Gc,Apoa2,Sptssa,Cat,Eci1,Cyp4a8,Hsd17b12,Acadm,Cel,Tmem150a,Cyp2e1,Fabp3,Rbp1,Ttr,Cd74,Lrat,Sts,Pam,ENSRNOP00000047118,Aadac,C3	22	1176	0.38	0.0113
GO:1903532	Positive regulation of secretion by cell	Cd38,Rtn4,Vamp7,Dpysl2,Spink3,Hyal3,Tgfb1,Fcer1g,Ptbp1,Arf1,Glul,Sri	12	420	0.57	0.0113
GO:0010632	Regulation of epithelial cell migration	Rtn4,Sparc,Evl,Plg,Anxa1,Tgfb1,ENSRNOP00000047118,Anxa3,Glul	9	242	0.68	0.012
GO:0030154	Cell differentiation	Alas2,Psmb8,Cdk1,Fabp7,Cd38,Col3a1,Rtn4,Cst3,Mgp,Ncstn,Adrm1,Mgst1,Vamp7,Tagln2,Igfbp3,Csrp1,Dpysl2,Acadm,RGD1564614,Fabp3,C1qa,Spink3,Nox4,Evl,Rgs14,Cdh17,B2m,Plg,Anxa1,Acta1,Vim,Tpm1,Cd74,Ap3d1,Ltbr,Coro1a,Ptprf,Tgfb1,Slc4a1,Cdc42,Fcer1g,Lsr,Eef2,Ptbp1,Vtn,Col4a1,Prlr,Eif4g2,Arf1,Lox,Ctsz,C3	52	4114	0.21	0.0122
GO:0060537	Muscle tissue development	Cdk1,Col3a1,Csrp1,Fkbp1a,Acadm,Nox4,Acta1,Tpm1,Tgfb1,Cdc42,Eef2	11	361	0.6	0.0122
GO:0016064	Immunoglobulin mediated immune response	C1qb,C1qc,C1qa,Irf7,Cd74,Fcer1g,C3	7	142	0.8	0.0126
GO:0042981	Regulation of apoptotic process	Cdk1,Aif1,Alb,Cd38,Prdx2,Aurkb,Fabp1,Oxr1,Cat,Igfbp3,Ldha,Vdac2,Nox4,Tomm22,Anxa1,Ucp2,Cd74,Bcap31,Ltbr,Coro1a,Ptprf,Tgfb1,Hpn,Cdc42,Fcer1g,Prlr,Lox,Ctsz	28	1720	0.32	0.0129
GO:0048519	Negative regulation of biological process	Cdk1,Iscu,Fabp7,Aif1,Alb,Cd38,Apoa2,Prdx2,Col3a1,Pttg1,Col5a2,Rtn4,Tfpi,Fbln5,Cst3,Aurkb,Fabp1,Oxr1,Cat,Igfbp3,Serpina1,Fkbp1a,Furin,C1qc,Sparc,Spink3,Vdac2,Nox4,Irf2bp1,Evl,Mcfd2,Epn1,Hyal3,Rgs14,B2m,Plg,Anxa1,Ucp2,Vim,Tpm1,Cd74,Apoa1bp,Coro1a,Ptprf,Tgfb1,Slc4a1,Hpn,Cdc42,Fcer1g,Ifitm1,Ptbp1,Maob,Sumo2,Vtn,Hp,Arhgdia,Fbn1,Ahsg,Prlr,Arhgef1,Eif4g2,Arf1,Sri,Ctsz,C3,ENSRNOP00000067246,Slpi	67	5794	0.17	0.013
GO:0022607	Cellular component assembly	Cdk1,Iscu,Aif1,Rplp0,Apoa2,Rtn4,Fbln5,Mgp,Aurkb,Adrm1,Vamp7,Csrp1,Sec24c,Fkbp1a,Shfm1,Cel,Col1a2,Evl,Cdh17,Ube2s,B2m,Acta1,Tpm1,Cd74,Coro1a,Tgfb1,Cdc42,Lsr,Vtn,Puf60,Ahsg,Prlr,Tm9sf4,Arf1,Lox	35	2384	0.28	0.0132
GO:0030162	Regulation of proteolysis	Psmb8,Psmb9,Pttg1,Tfpi,Cst3,Fabp1,Adrm1,Serpina1,Furin,Spink3,Bcap31,Hpn,Sumo2,Vtn,Ahsg,Ctsz,C3,Slpi	18	868	0.43	0.0132
GO:0002443	Leukocyte mediated immunity	Vamp7,C1qb,C1qc,C1qa,Irf7,Cd74,Coro1a,Fcer1g,Anxa3,C3	10	307	0.62	0.0137
GO:0007595	Lactation	Alas2,Rplp0,Gc,Pam,Prlr	5	63	1.01	0.0137
GO:0045861	Negative regulation of proteolysis	Pttg1,Tfpi,Cst3,Fabp1,Serpina1,Furin,Spink3,Vtn,Ahsg,Ctsz,C3,Slpi	12	433	0.55	0.0137
GO:0065003	Protein-containing complex assembly	Cdk1,Aif1,Rplp0,Apoa2,Rtn4,Mgp,Adrm1,Vamp7,Sec24c,Fkbp1a,Shfm1,Col1a2,Evl,Ube2s,B2m,Cd74,Tgfb1,Vtn,Puf60,Ahsg,Prlr,Tm9sf4,Arf1	23	1288	0.36	0.0138
GO:0022604	Regulation of cell morphogenesis	Rtn4,Vamp7,Dpysl2,Sparc,Anxa1,Vim,Tpm1,Coro1a,Ptprf,Hpn,Cdc42,ENSRNOP00000047118,Arhgdia,Eif4g2	14	573	0.5	0.0139
GO:0045471	Response to ethanol	Cdk1,Bdh1,Ugt2b1,Cat,Cyp2e1,Sparc,Spink3,Eef2,Maob	9	253	0.66	0.015
GO:0046649	Lymphocyte activation	Prdx2,Ncstn,Vamp7,Fkbp1a,Clec4f,Cdh17,B2m,Anxa1,Cd74,Coro1a,Tgfb1,Fcer1g	12	440	0.55	0.015
GO:0051128	Regulation of cellular component organization	Cd38,Apoa2,Pttg1,Rtn4,Fbln5,Cst3,Aurkb,Vamp7,Igfbp3,Dpysl2,Sparc,Vdac2,Nox4,Evl,Epn1,Cdh17,B2m,Anxa1,Cd53,Vim,Tpm1,Coro1a,Ptprf,Tgfb1,Hpn,Cdc42,Ptbp1,Vtn,Pam,ENSRNOP00000047118,Cdc37,Arhgdia,Ahsg,Eif4g2,Arf1,Ube2n,Ctsz,C3	38	2704	0.26	0.015
GO:0090087	Regulation of peptide transport	Cdk1,Cd38,Vamp7,Spink3,Anxa1,Ucp2,Cd74,Bcap31,Tgfb1,Cdc42,Ptbp1,Pam,Tm9sf4,Arf1,Glul,Sri	16	731	0.45	0.016
GO:0042060	Wound healing	Col3a1,Tfpi,RGD1564614,Sparc,Plg,Tpm1,Tgfb1,Slc4a1,Lox,C3	10	320	0.61	0.0177
GO:0051098	Regulation of binding	Pcbd1,Aurkb,Fkbp1a,B2m,Ptprf,Tgfb1,Cdc42,Vtn,Lox,Sri,Ctsz,Slpi	12	449	0.54	0.0177
GO:0002478	Antigen processing and presentation of exogenous peptide antigen	Sec24c,B2m,Cd74,Fcer1g	4	36	1.16	0.0178
GO:0070848	Response to growth factor	Col3a1,Cat,Col1a2,Sparc,Nox4,Anxa1,Vim,Coro1a,Tgfb1,Dync1li2,Eef2,Fbn1,Anxa3,Ddc	14	593	0.48	0.0185
GO:0010634	Positive regulation of epithelial cell migration	Rtn4,Sparc,Plg,Anxa1,Tgfb1,ENSRNOP00000047118,Anxa3	7	155	0.77	0.0186
GO:0050764	Regulation of phagocytosis	Apoa2,Tgfb1,Fcer1g,Ahsg,Mfge8,C3	6	109	0.85	0.0187
GO:0016043	Cellular component organization	Cdk1,Iscu,Aif1,Rplp0,Sec31a,Apoa2,Col3a1,Pttg1,Col5a2,Rtn4,Fbln5,Cst3,Mgp,Aurkb,Adrm1,Vamp7,Csrp1,Sec24c,Fkbp1a,Hsd17b12,Dpysl2,Shfm1,Cel,Col1a2,C1qb,C1qc,RGD1564614,C1qa,Tomm22,Evl,Epn1,Rgs14,Cdh17,Ube2s,B2m,Plg,Anxa1,Acta1,Vim,Tpm1,Cd74,Ap3d1,Apoa1bp,Coro1a,Ptprf,Tgfb1,Slc4a1,Hpn,Dync1li2,Cdc42,Fcer1g,Lsr,Vtn,Puf60,Col4a1,Ahsg,Prlr,Reep3,Mfge8,Eif4g2,Tm9sf4,Syngr2,Arf1,Ube2n,Lox,ENSRNOP00000067…	66	5777	0.17	0.0191
GO:0016192	Vesicle-mediated transport	Aif1,Sec31a,Vamp7,Sec24c,Dpysl2,Cel,Clec4f,Mcfd2,Epn1,Anxa1,Bcap31,Ap3d1,Coro1a,Cdc42,Fcer1g,Sys1,Vtn,ENSRNOP00000047118,Mfge8,Tm9sf4,Anxa3,Syngr2,Ddc,Arf1	24	1413	0.34	0.0191
GO:0010935	Regulation of macrophage cytokine production	Rtn4,Cd74,Tgfb1	3	14	1.44	0.0194
GO:0045785	Positive regulation of cell adhesion	Aif1,Hsd17b12,Ninj1,Anxa1,Tpm1,Cd74,Ap3d1,Coro1a,Tgfb1,Slc4a1,Cdc42,Vtn	12	456	0.53	0.0194
GO:0002274	Myeloid leukocyte activation	Aif1,Vamp7,C1qa,Ltbr,Tgfb1,Fcer1g,Anxa3	7	158	0.76	0.02
GO:0030335	Positive regulation of cell migration	Aif1,Rtn4,Furin,Sparc,Nox4,Plg,Anxa1,Cd99l2,Cd74,Coro1a,Tgfb1,Vtn,ENSRNOP00000047118,Anxa3	14	600	0.48	0.02
GO:0006909	Phagocytosis	Aif1,Vamp7,Anxa1,Coro1a,Cdc42,Fcer1g,Mfge8,Tm9sf4,Anxa3	9	269	0.64	0.021
GO:0002252	Immune effector process	Prdx2,Vamp7,C1qb,C1qc,RGD1564614,C1qa,Cdh17,Irf7,Cd74,Coro1a,Fcer1g,Ifitm1,Anxa3,C3	14	608	0.47	0.0222
GO:0033591	Response to l-ascorbic acid	Cat,Sparc,Hp	3	15	1.41	0.0222
GO:0044703	Multi-organism reproductive process	Alas2,Cd38,Gc,Cst3,Adrm1,Igfbp3,Spink3,Pgam2,Vdac2,Slc4a2,Epn1,Hyal3,Ucp2,Vim,Bcap31,Tgfb1,Gamt,Eif4h,Sts,LOC367746,Pam,Hp,Mfge8	23	1344	0.35	0.0222
GO:0044248	Cellular catabolic process	Psmb8,Psmb9,Ugt2b15,Ugt2b1,Apoa2,Prdx2,Ubl7,Adrm1,Cat,Eci1,Acadm,Cel,Cyp2e1,Fabp3,Rnf111,Hyal3,Ube2s,Sord,Plg,Tgfb1,Hibch,Ptbp1,Maob,ENSRNOP00000047118,Ube2n,Dpyd,Ctsz	27	1712	0.31	0.023
GO:0045765	Regulation of angiogenesis	Rtn4,Fbln5,Sparc,Epn1,Anxa1,Apoa1bp,ENSRNOP00000047118,Anxa3,Glul,C3	10	335	0.59	0.023
GO:0051659	Maintenance of mitochondrion location	Alb,ENSRNOP00000067246	2	2	2.11	0.023
GO:0060416	Response to growth hormone	Bdh1,Ugt2b1,Igfbp3,Hp	4	40	1.11	0.0233
GO:0048523	Negative regulation of cellular process	Cdk1,Iscu,Aif1,Alb,Cd38,Apoa2,Prdx2,Col3a1,Pttg1,Col5a2,Rtn4,Tfpi,Fbln5,Cst3,Aurkb,Fabp1,Oxr1,Cat,Igfbp3,Serpina1,Fkbp1a,Furin,C1qc,Sparc,Spink3,Vdac2,Nox4,Irf2bp1,Evl,Mcfd2,Rgs14,B2m,Plg,Anxa1,Ucp2,Vim,Tpm1,Cd74,Coro1a,Ptprf,Tgfb1,Slc4a1,Hpn,Cdc42,Fcer1g,Ptbp1,Maob,Sumo2,Vtn,Hp,Arhgdia,Fbn1,Ahsg,Prlr,Arhgef1,Eif4g2,Arf1,Sri,Ctsz,C3,Slpi	61	5264	0.18	0.0236
GO:0044093	Positive regulation of molecular function	Iscu,Apoa2,Prdx2,Ncstn,Aurkb,Fabp1,Adrm1,Cat,Igfbp3,Fkbp1a,Rabgap1,Nox4,Rgs14,Ube2s,B2m,Tpm1,Cd74,Bcap31,Tgfb1,Cdc42,Vtn,Arhgdia,Fbn1,Prlr,Arhgef1,Anxa3,Arf1,Ube2n,ENSRNOP00000067246	29	1905	0.29	0.0237
GO:0051130	Positive regulation of cellular component organization	Rtn4,Aurkb,Vamp7,Igfbp3,Nox4,Evl,Epn1,Cdh17,B2m,Anxa1,Cd53,Tpm1,Ptprf,Tgfb1,Cdc42,Ptbp1,Vtn,ENSRNOP00000047118,Cdc37,Eif4g2,Arf1,Ube2n,C3	23	1356	0.34	0.0239
GO:0065007	Biological regulation	Alas2,Psmb8,Psmb9,Pcbd1,Cdk1,Iscu,Fabp7,Aif1,Rplp0,Alb,Cd38,Gc,Apoa2,Prdx2,Col3a1,Pttg1,Col5a2,Rtn4,Tfpi,Fbln5,Cst3,Mgp,Ncstn,Aurkb,Fabp1,Tm2d1,Adrm1,Oxr1,Vamp7,Cat,Igfbp3,Serpina1,Fkbp1a,Hsd17b12,Dpysl2,Acadm,Rabgap1,Cel,Furin,Tmem150a,Col1a2,C1qb,C1qc,RGD1564614,Fabp3,C1qa,Ldha,Sparc,Rnf111,Spink3,Pgam2,Vdac2,Rbp1,Nox4,Irf2bp1,Tomm22,Evl,Slc4a2,Mcfd2,Epn1,Hyal3,Rgs14,Cdh17,Ttr,Ninj1,Ube2s,B2m,P…	132	14272	0.08	0.0239
GO:0046903	Secretion	Alas2,Rplp0,Gc,Fbln5,Vamp7,Cel,Furin,Anxa1,Coro1a,Fcer1g,Pam,Prlr,Anxa3,Syngr2	14	618	0.47	0.0245
GO:0007399	Nervous system development	Fabp7,Aif1,Bdh1,Cd38,Col3a1,Rtn4,Cst3,Ncstn,Vamp7,Csrp1,Dpysl2,Cel,C1qb,RGD1564614,C1qa,Evl,Mcfd2,Ak3,Rgs14,B2m,Anxa1,Vim,Ptprf,Tgfb1,Cdc42,Lsr,Eef2,Ptbp1,Vtn,Pam,Col4a1,Ahsg,Eif4g2,Anxa3,Arf1,Ctsz,C3	37	2697	0.25	0.0247
GO:0009987	Cellular process	Slc26a1,Alas2,Psmb8,Psmb9,Pcbd1,Cdk1,Iscu,Fabp7,Aif1,Rplp0,Ugt2b15,Ugt2b1,Sec31a,Alb,Cd38,Gc,Apoa2,Prdx2,Col3a1,Pttg1,Col5a2,Sod3,Sptssa,Rtn4,Tfpi,Fbln5,Cst3,Mgp,Lyz2,Ncstn,Aurkb,Fabp1,Tm2d1,Ubl7,Adrm1,Mgst1,Oxr1,Vamp7,Tagln2,Cat,Igfbp3,Lgals2,Eci1,Csrp1,Sec24c,Cyp4a8,Fkbp1a,Hsd17b12,Dpysl2,Acadm,Rabgap1,Shfm1,Cel,Laptm5,Furin,Tmem150a,Col1a2,Oplah,Cyp2e1,C1qb,C1qc,RGD1564614,Fabp3,C1qa,Ldha,Spar…	157	18050	0.05	0.0247
GO:0019216	Regulation of lipid metabolic process	Apoa2,Fabp1,Fabp3,Anxa1,Cd74,Tgfb1,Cdc42,Lsr,Aadac,Arf1,C3	11	406	0.54	0.0247
GO:0002460	Adaptive immune response based on somatic recombination of immune receptors built from immunoglobulin superfamily domains	C1qb,C1qc,C1qa,Irf7,Cd74,Tgfb1,Fcer1g,C3	8	222	0.67	0.0256
GO:0034308	Primary alcohol metabolic process	Cel,Rbp1,Ttr,Akr7a2,Lrat	5	77	0.92	0.026
GO:0007417	Central nervous system development	Fabp7,Aif1,Bdh1,Col3a1,Rtn4,Cst3,Ncstn,Dpysl2,C1qb,C1qa,Evl,Mcfd2,Ak3,Vim,Tgfb1,Lsr,Vtn,Pam,Col4a1,Ahsg,Anxa3	21	1197	0.36	0.027
GO:0008284	Positive regulation of cell population proliferation	Cdk1,Aif1,Cd38,Rtn4,Fbln5,Cst3,Spink3,Anxa1,Vim,Cd74,Coro1a,Tgfb1,Slc4a1,Hpn,Cdc42,Tspan31,Sts,Mfge8,Glul,Ctsz	20	1111	0.37	0.027
GO:0071363	Cellular response to growth factor stimulus	Col3a1,Cat,Col1a2,Sparc,Nox4,Anxa1,Vim,Coro1a,Tgfb1,Dync1li2,Eef2,Fbn1,Ddc	13	553	0.48	0.027
GO:0006955	Immune response	Aif1,Vamp7,C1qb,C1qc,RGD1564614,C1qa,Evl,Cdh17,B2m,Irf7,Anxa1,Vim,Cd74,Ltbr,Coro1a,Tgfb1,Cdc42,Fcer1g,Ifitm1,Vtn,ENSRNOP00000047118,Anxa3,C3,Slpi	24	1466	0.33	0.0275
GO:0050766	Positive regulation of phagocytosis	Apoa2,Fcer1g,Ahsg,Mfge8,C3	5	79	0.91	0.0283
GO:0034614	Cellular response to reactive oxygen species	Cdk1,Prdx2,Sod3,Cst3,Fabp1,Anxa1,Tpm1	7	173	0.72	0.0292
GO:0008104	Protein localization	Cdk1,Sec31a,Sptssa,Rtn4,Fbln5,Aurkb,Vamp7,Sec24c,Rabgap1,Shfm1,Tmem150a,Tomm22,Mcfd2,Anxa1,Scamp4,Cd74,Bcap31,Ap3d1,Tgfb1,Slc4a1,Cdc42,Fcer1g,Sys1,Lsr,Sumo2,Fbn1,Afm,Tm9sf4,Syngr2,Arf1,Sri	31	2141	0.27	0.0311
GO:0032787	Monocarboxylic acid metabolic process	Ugt2b1,Eci1,Cyp4a8,Hsd17b12,Acadm,Cyp2e1,Fabp3,Ldha,Pgam2,Rbp1,Cd74,Gamt,Pam,C3	14	638	0.45	0.0311
GO:0048499	Synaptic vesicle membrane organization	Ap3d1,Syngr2	2	3	1.94	0.0336
GO:1903335	Regulation of vacuolar transport	Vamp7,Arf1	2	3	1.94	0.0336
GO:0002791	Regulation of peptide secretion	Cd38,Spink3,Anxa1,Ucp2,Cd74,Tgfb1,Ptbp1,Pam,Arf1,Glul,Sri	11	430	0.52	0.0358
GO:0042692	Muscle cell differentiation	Cdk1,Csrp1,Acadm,RGD1564614,Nox4,Acta1,Tpm1,Lox,C3	9	298	0.59	0.0359
GO:0006911	Phagocytosis, engulfment	Aif1,Vamp7,Cdc42,Fcer1g,Mfge8	5	85	0.88	0.0368
GO:0042572	Retinol metabolic process	Cel,Rbp1,Ttr,Lrat	4	48	1.03	0.0383
GO:0000303	Response to superoxide	Prdx2,Sod3,Ucp2	3	20	1.29	0.0393
GO:0060627	Regulation of vesicle-mediated transport	Apoa2,Vamp7,Hyal3,B2m,Anxa1,Coro1a,Tgfb1,Cdc42,Fcer1g,Vtn,Ahsg,Mfge8,Arf1,C3	14	659	0.44	0.0401
GO:0001944	Vasculature development	Col3a1,Rtn4,Col1a2,RGD1564614,Plg,Apoa1bp,Tgfb1,Cdc42,Col4a1,Mfge8,Lox,Glul,C3	13	585	0.46	0.0413
GO:0030199	Collagen fibril organization	Col3a1,Col5a2,Col1a2,Lox	4	50	1.01	0.0432
GO:0048738	Cardiac muscle tissue development	Cdk1,Fkbp1a,Acadm,Nox4,Tpm1,Tgfb1,Cdc42	7	189	0.68	0.0445
GO:0044282	Small molecule catabolic process	Eci1,Acadm,Cel,Fabp3,Ldha,Hyal3,Sord,Tgfb1,Hibch,Dpyd	10	376	0.54	0.0449
GO:1903706	Regulation of hemopoiesis	Prdx2,Adrm1,C1qc,Rbp1,B2m,Anxa1,Cd74,Ap3d1,Tgfb1,Fbn1,Lox	11	445	0.5	0.0449
GO:0043320	Natural killer cell degranulation	Vamp7,Coro1a	2	4	1.81	0.0464
GO:0006721	Terpenoid metabolic process	Cel,Cyp2e1,Rbp1,Ttr,Lrat	5	91	0.85	0.0469
GO:1903034	Regulation of response to wounding	Prdx2,Rtn4,Tfpi,Plg,Anxa1,Ptprf,Fcer1g	7	192	0.67	0.0475
GO:1905952	Regulation of lipid localization	Apoa2,Igfbp3,Fabp3,Apoa1bp,Lrat,Mest,C3	7	192	0.67	0.0475
GO:0019886	Antigen processing and presentation of exogenous peptide antigen via mhc class ii	Sec24c,Cd74,Fcer1g	3	22	1.25	0.0477
GO:0071840	Cellular component organization or biogenesis	Cdk1,Iscu,Aif1,Rplp0,Sec31a,Apoa2,Col3a1,Pttg1,Col5a2,Rtn4,Fbln5,Cst3,Mgp,Aurkb,Adrm1,Vamp7,Csrp1,Sec24c,Fkbp1a,Hsd17b12,Dpysl2,Shfm1,Cel,Col1a2,C1qb,C1qc,RGD1564614,C1qa,Tomm22,Evl,Epn1,Rgs14,Cdh17,Ube2s,B2m,Plg,Anxa1,Acta1,Vim,Tpm1,Cd74,Ap3d1,Apoa1bp,Coro1a,Ptprf,Tgfb1,Slc4a1,Hpn,Dync1li2,Cdc42,Fcer1g,Lsr,Vtn,Puf60,Col4a1,Ahsg,Prlr,Reep3,Mfge8,Eif4g2,Tm9sf4,Syngr2,Arf1,Ube2n,Lox,Glul,ENSRNOP000…	67	6148	0.15	0.0497
rno04610	Complement and coagulation cascades	Tfpi,Serpina1,C1qb,C1qc,C1qa,Plg,Vtn,C3	8	78	1.12	0.00011
rno01100	Metabolic pathways	Pcbd1,Cyp3a62,Bdh1,Ugt2b15,Ugt2b1,Cd38,Nnmt,Mgst1,Cat,Cyp4a8,Hsd17b12,Acadm,Cel,Inmt,Oplah,Cyp2e1,Ldha,Pgam2,Hyal3,Ckm,Sord,Cox6a2,Hibch,Gamt,Maob,Ddc,Dpyd,Glul	28	1450	0.4	0.0014
rno00980	Metabolism of xenobiotics by cytochrome P450	Ugt2b15,Ugt2b1,Mgst1,Cyp2e1,Akr7a2	5	64	1	0.0098
rno00830	Retinol metabolism	Cyp3a62,Ugt2b15,Ugt2b1,Cyp4a8,Lrat	5	71	0.96	0.0124
rno00380	Tryptophan metabolism	Cat,Inmt,Maob,Ddc	4	47	1.04	0.0195
rno03050	Proteasome	Psmb8,Psmb9,Adrm1,Shfm1	4	46	1.05	0.0195
rno05142	Chagas disease	C1qb,C1qc,C1qa,Tgfb1,C3	5	98	0.82	0.0284
rno05133	Pertussis	C1qb,C1qc,C1qa,C3	4	68	0.88	0.0476
