# Supplementary material for: Detecting the Critical States of Type 2 Diabetes Mellitus Based on Degree Matrix Network Entropy by Cross-Tissue Analysis
Source: Entropy (Basel). 2022 Sep 5;24(9):1249. doi: 10.3390/e24091249 (PMC9498060; doi:10.3390/e24091249)
Supplement: Supplementary file 1 [file entropy-24-01249-s001.zip › Supplementary Table S6.xlsx]

## Sheet: Name
The ‘dark genes’, which involve Type 2 Diabetes, in rat adipose, gastrocnemius muscle and liver tissue

## Sheet: Dark Genes
The ‘dark genes’
adipose tissue	muscle tissue	liver tissue
DEPDC1	SPAG9	EPN1
CCDC80	IPO5	ROGDI
HPX	PKN2	STS
UBL7	ALKBH5	MKLN1
NDUFV3	PCOLCE	ACTA1
MVD	PPP2CA	SLC26A1
COL1A1	SIX1	NNMT
RGS7	UBE2G1	IFITM1
IFITM1	PNPLA8	ATP2A1
HYAL3	IFITM3
FAM92A1	SYPL2
RING1	ITGB1BP2
BCKDHA	MIA3
	UBXN2A
